# Supplementary material for: Connecting Anxiety and Genomic Copy Number Variation: A Genome-Wide Analysis in CD-1 Mice
Source: PubMed Central journal article supplement (PMC4444327; doi:10.1371/journal.pone.0128465), 2015-05-26

# Q-Q plots of the association of CNVs with EPM parameter...

...percent time on open arm

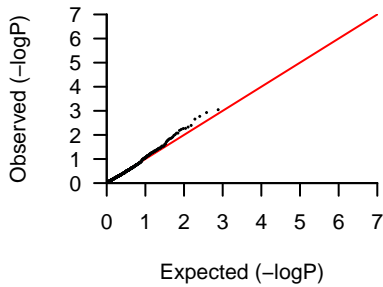

...time immobile

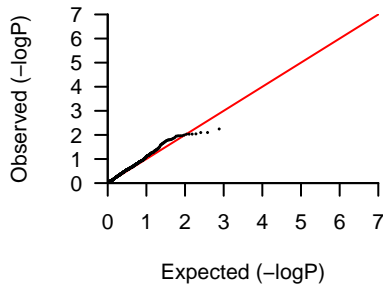

...entries closed arm

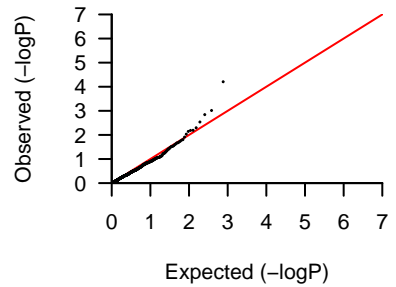

...latency to first entry closed arm

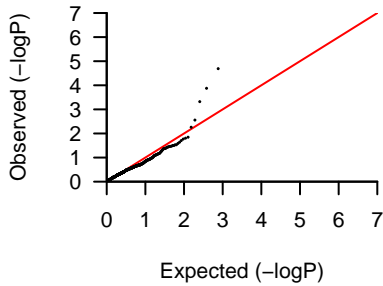

...entries open arm

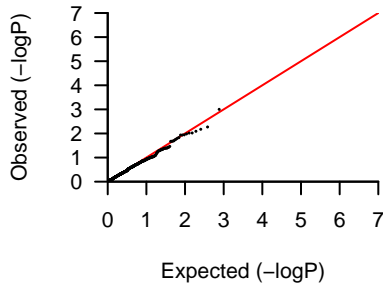

...time on open arm

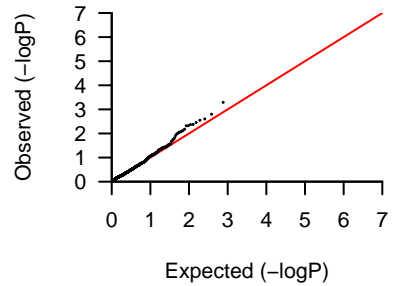

...full entries open arm

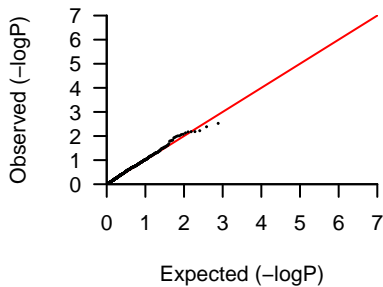

...percent entries open arm

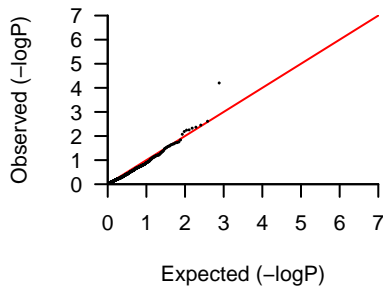

...total entries

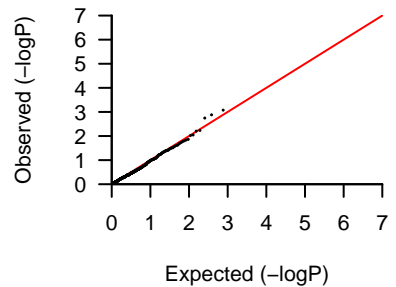

# Q-Q plots of the association of CNVs with transf. OF parameter...

## ...total distance travelled

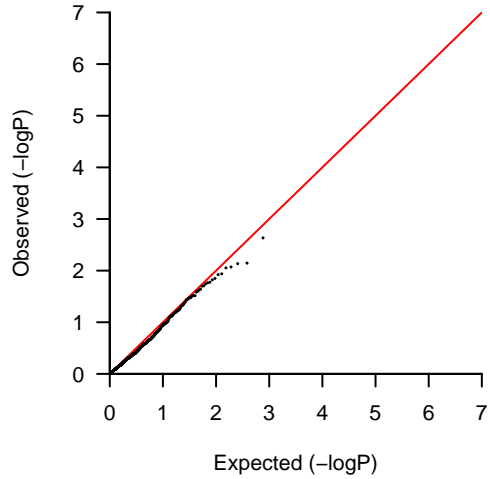

## ...time immobile

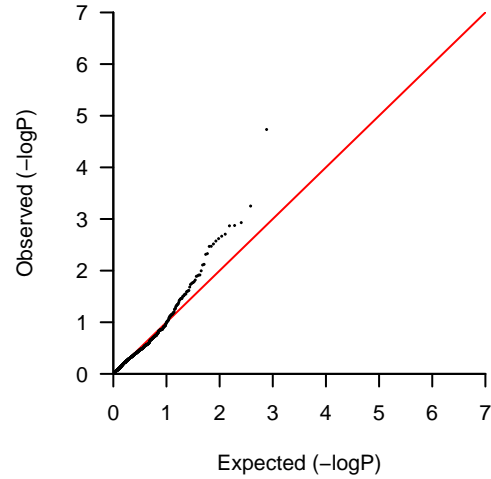

## ...entries inner zone

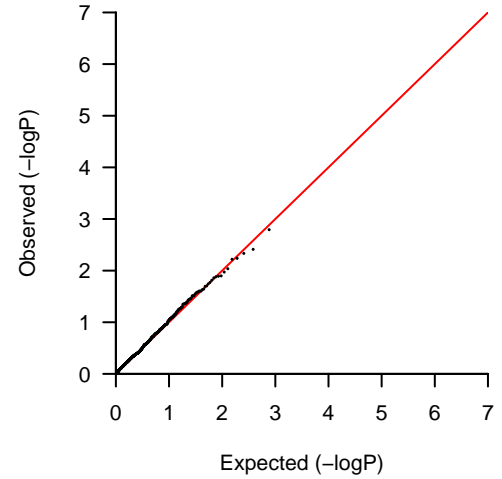

## ...distance travelled inner zone

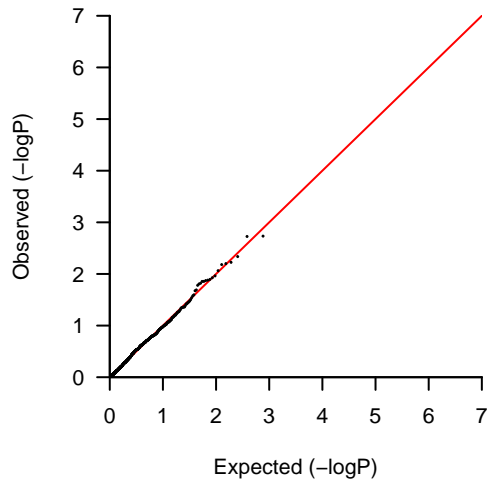

## ...distance travelled outer zone

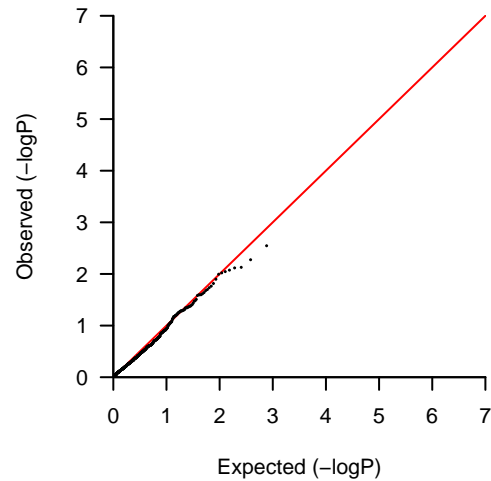

# Q-Q plots of the association of CNVs with transf. FST parameter...

## ...swimming frequency

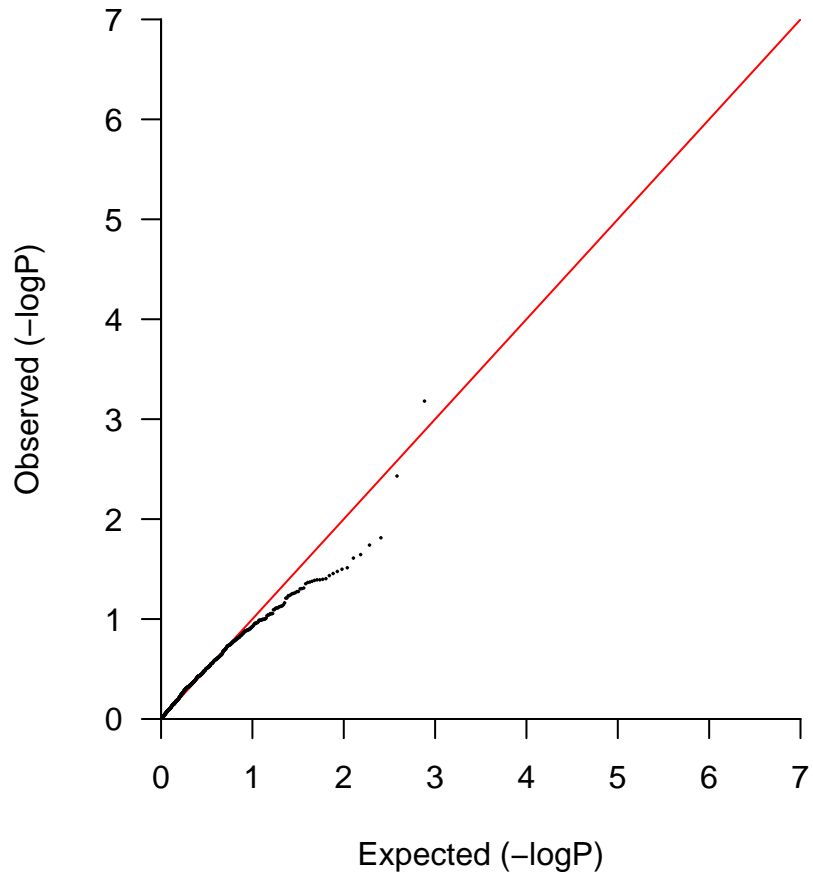

## ...floating latency

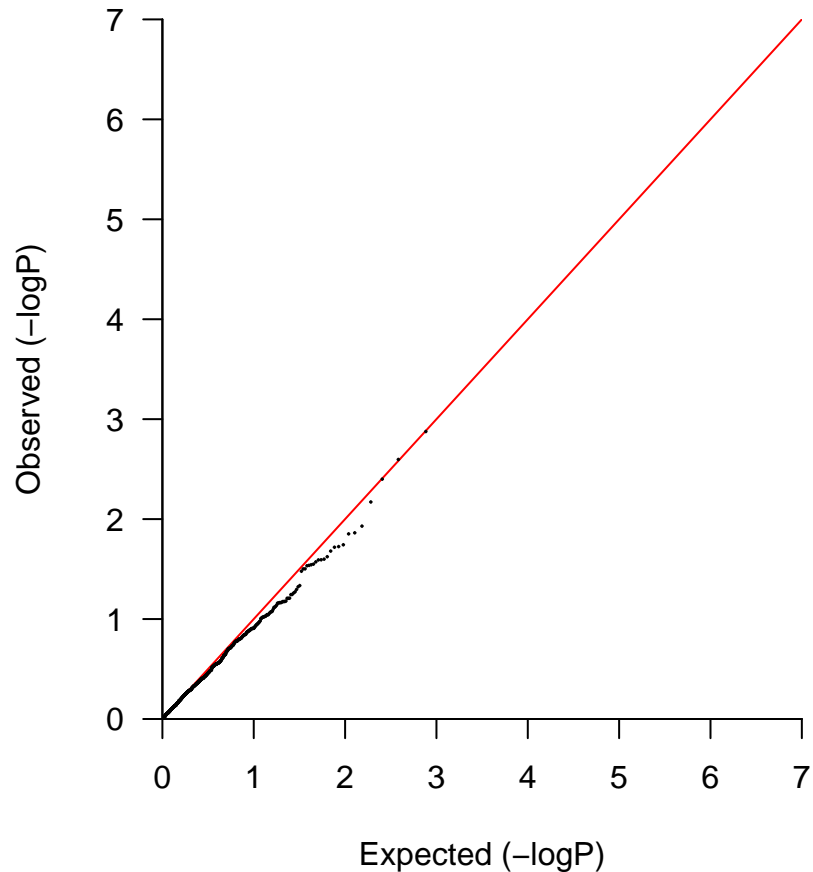

Q-Q plots of the association of CNVs with transf. SRT parameter...

...initial CORT

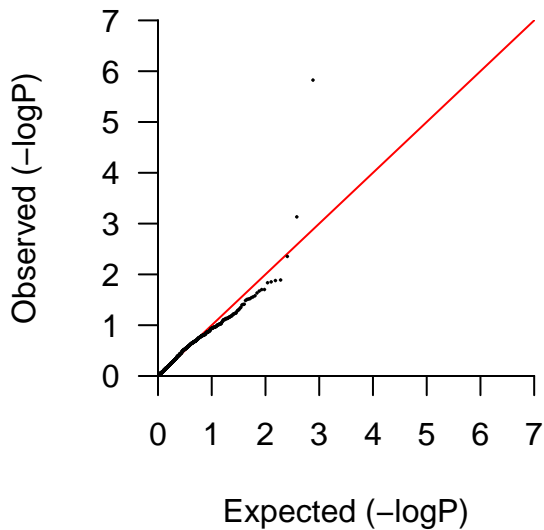

# Q-Q plots of the association of CNVs with transf. TST parameter...

## ...immobility frequency

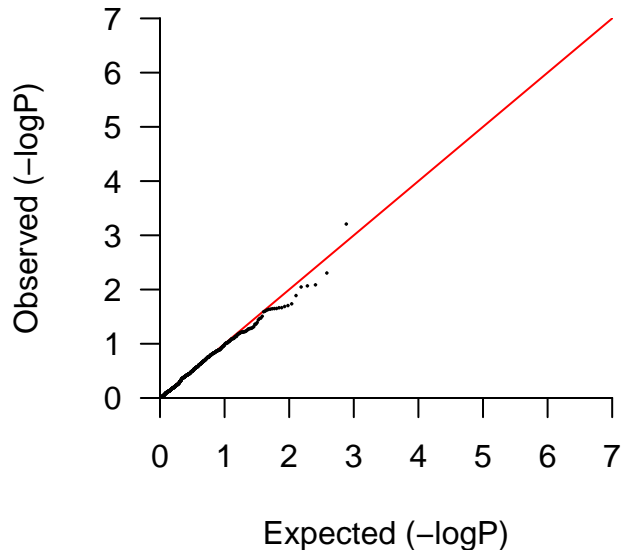

## ...immobility latency

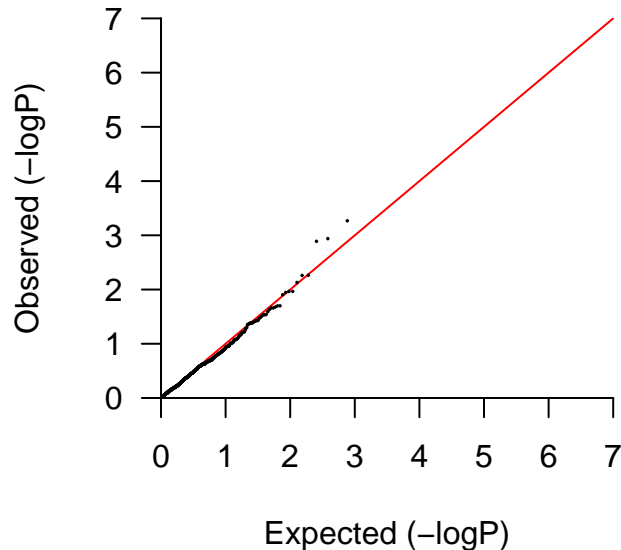

Supplement: pone.0128465.s002.pdf [file pone.0128465.s002.pdf]
