# Supplementary material for: Connecting Anxiety and Genomic Copy Number Variation: A Genome-Wide Analysis in CD-1 Mice
Source: PubMed Central journal article supplement (PMC4444327; doi:10.1371/journal.pone.0128465), 2015-05-26

A)

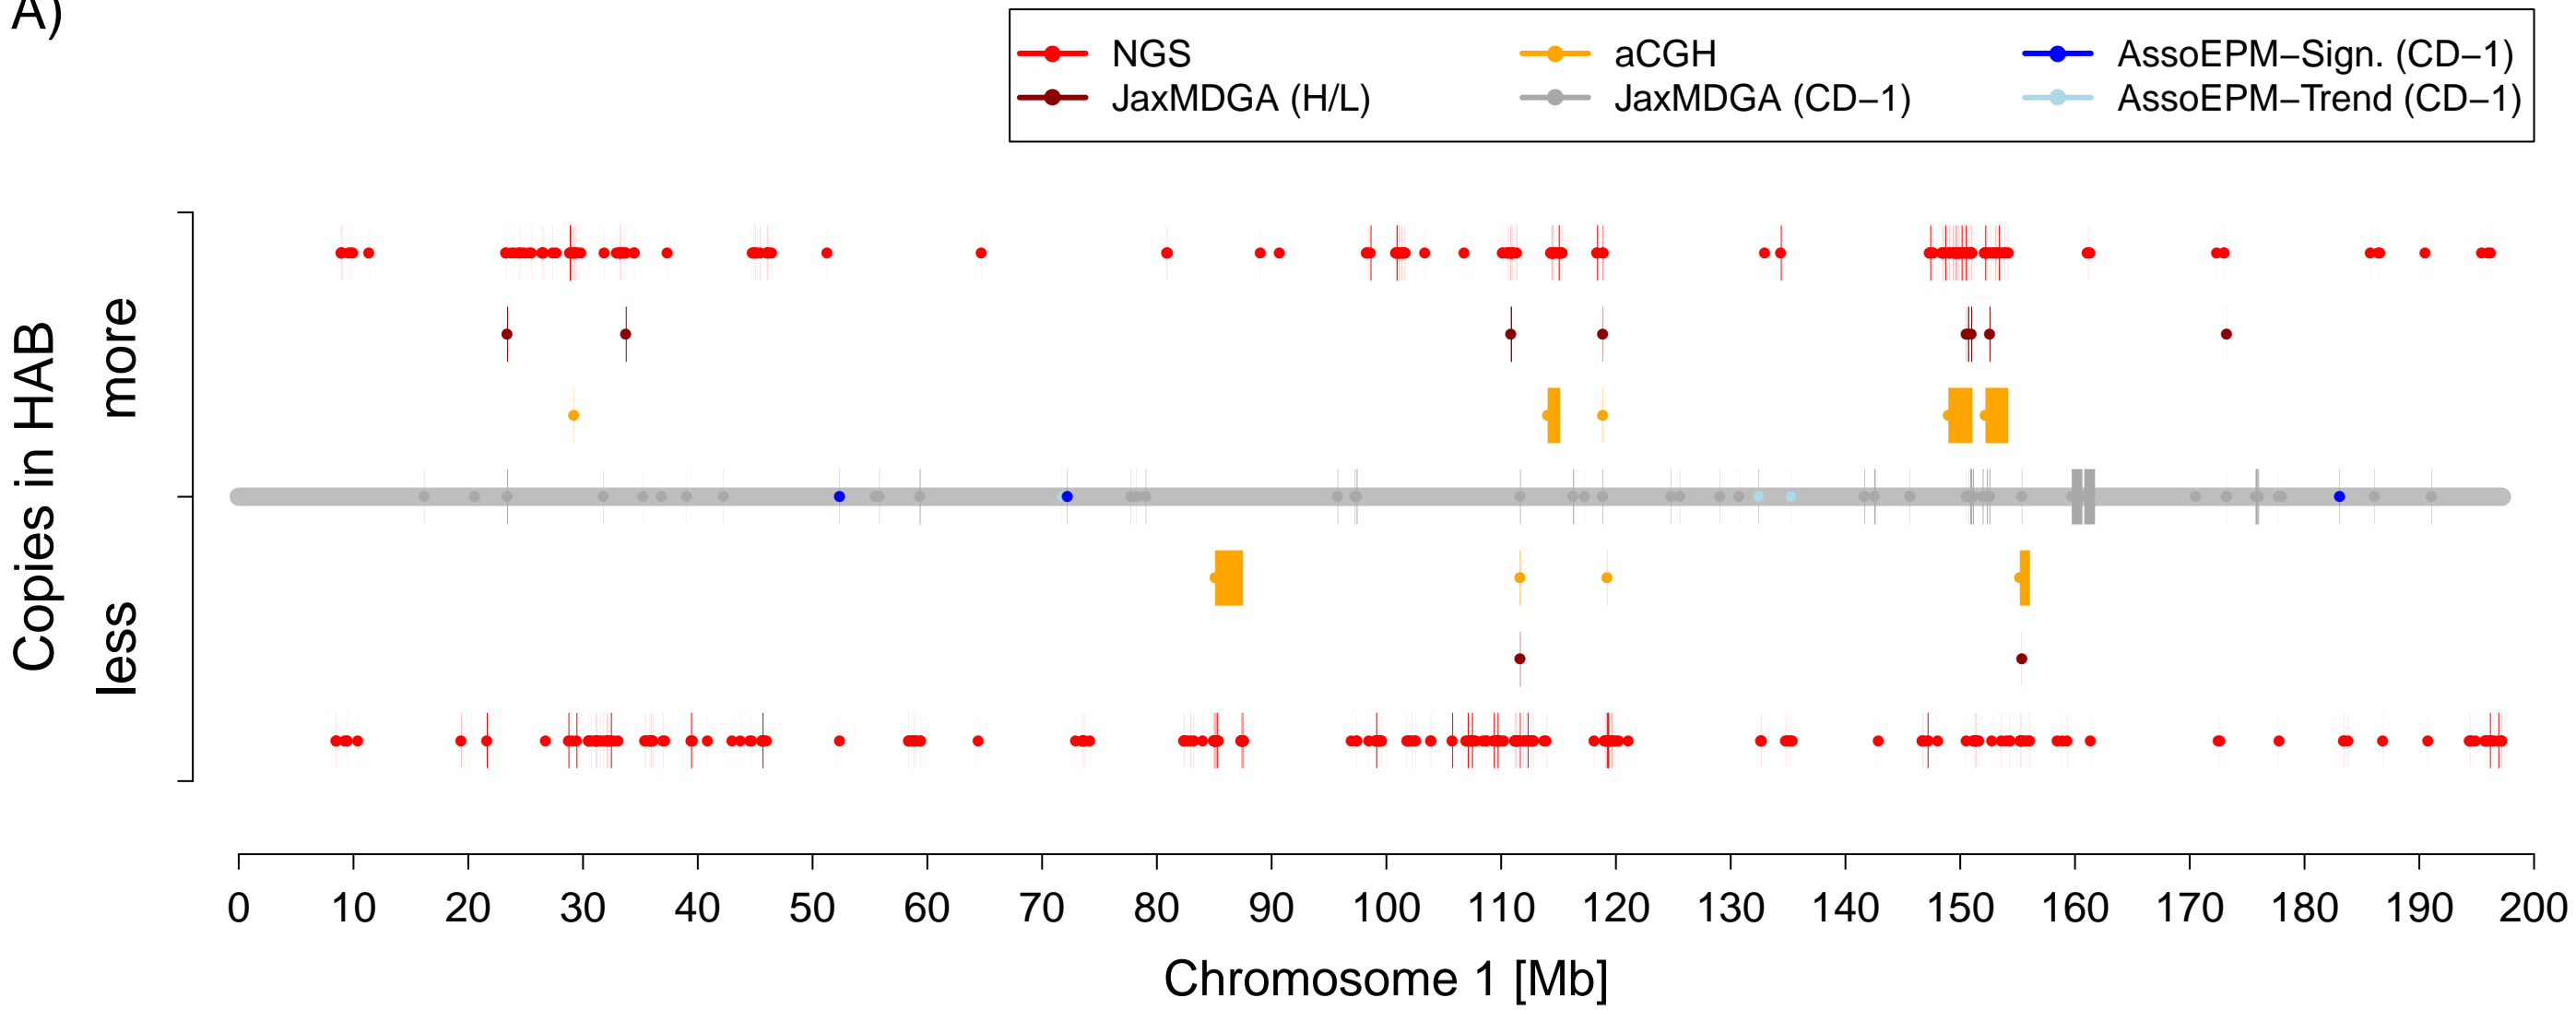

B)

Copies in HAB

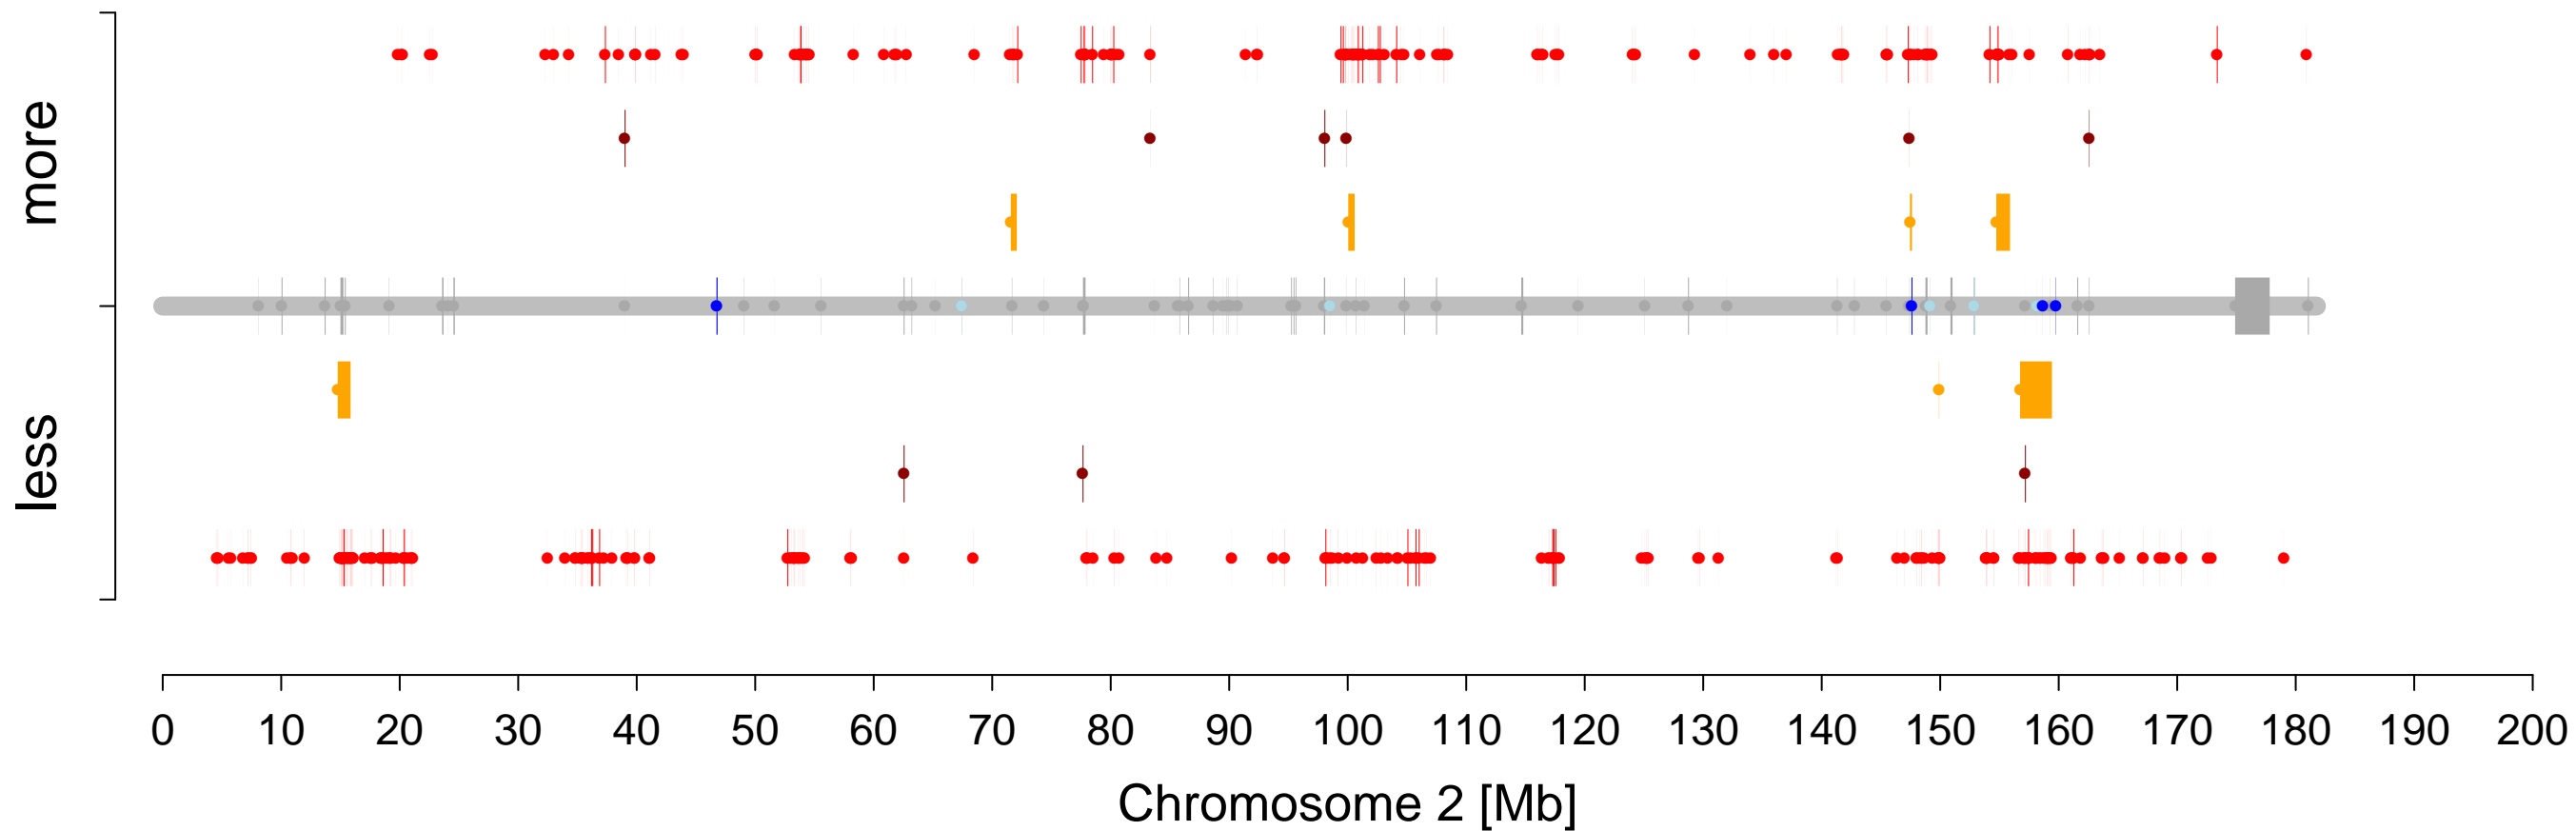

C)

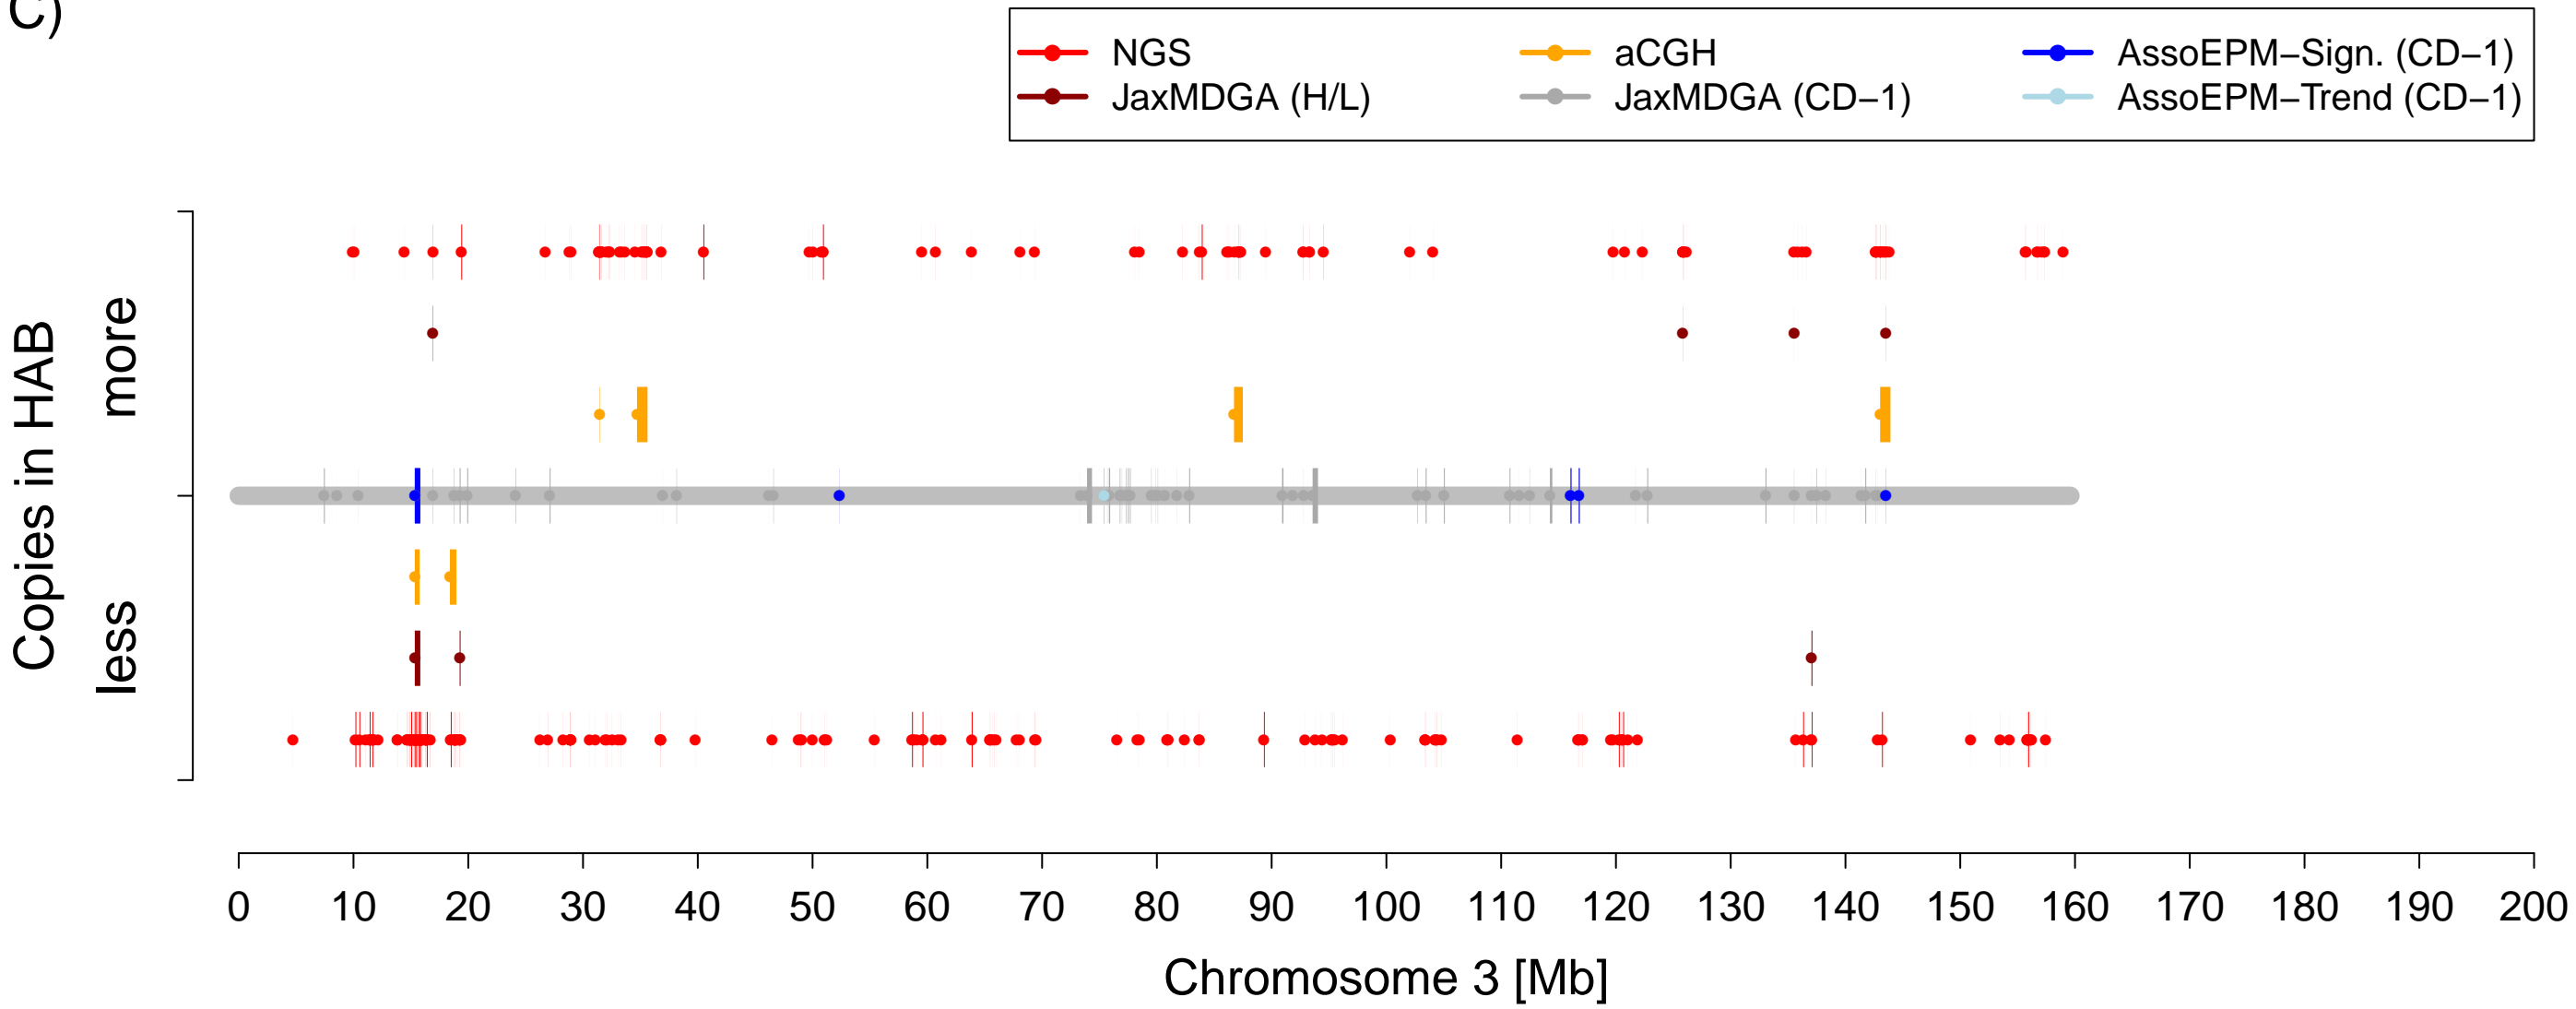

D)

Copies in HAB

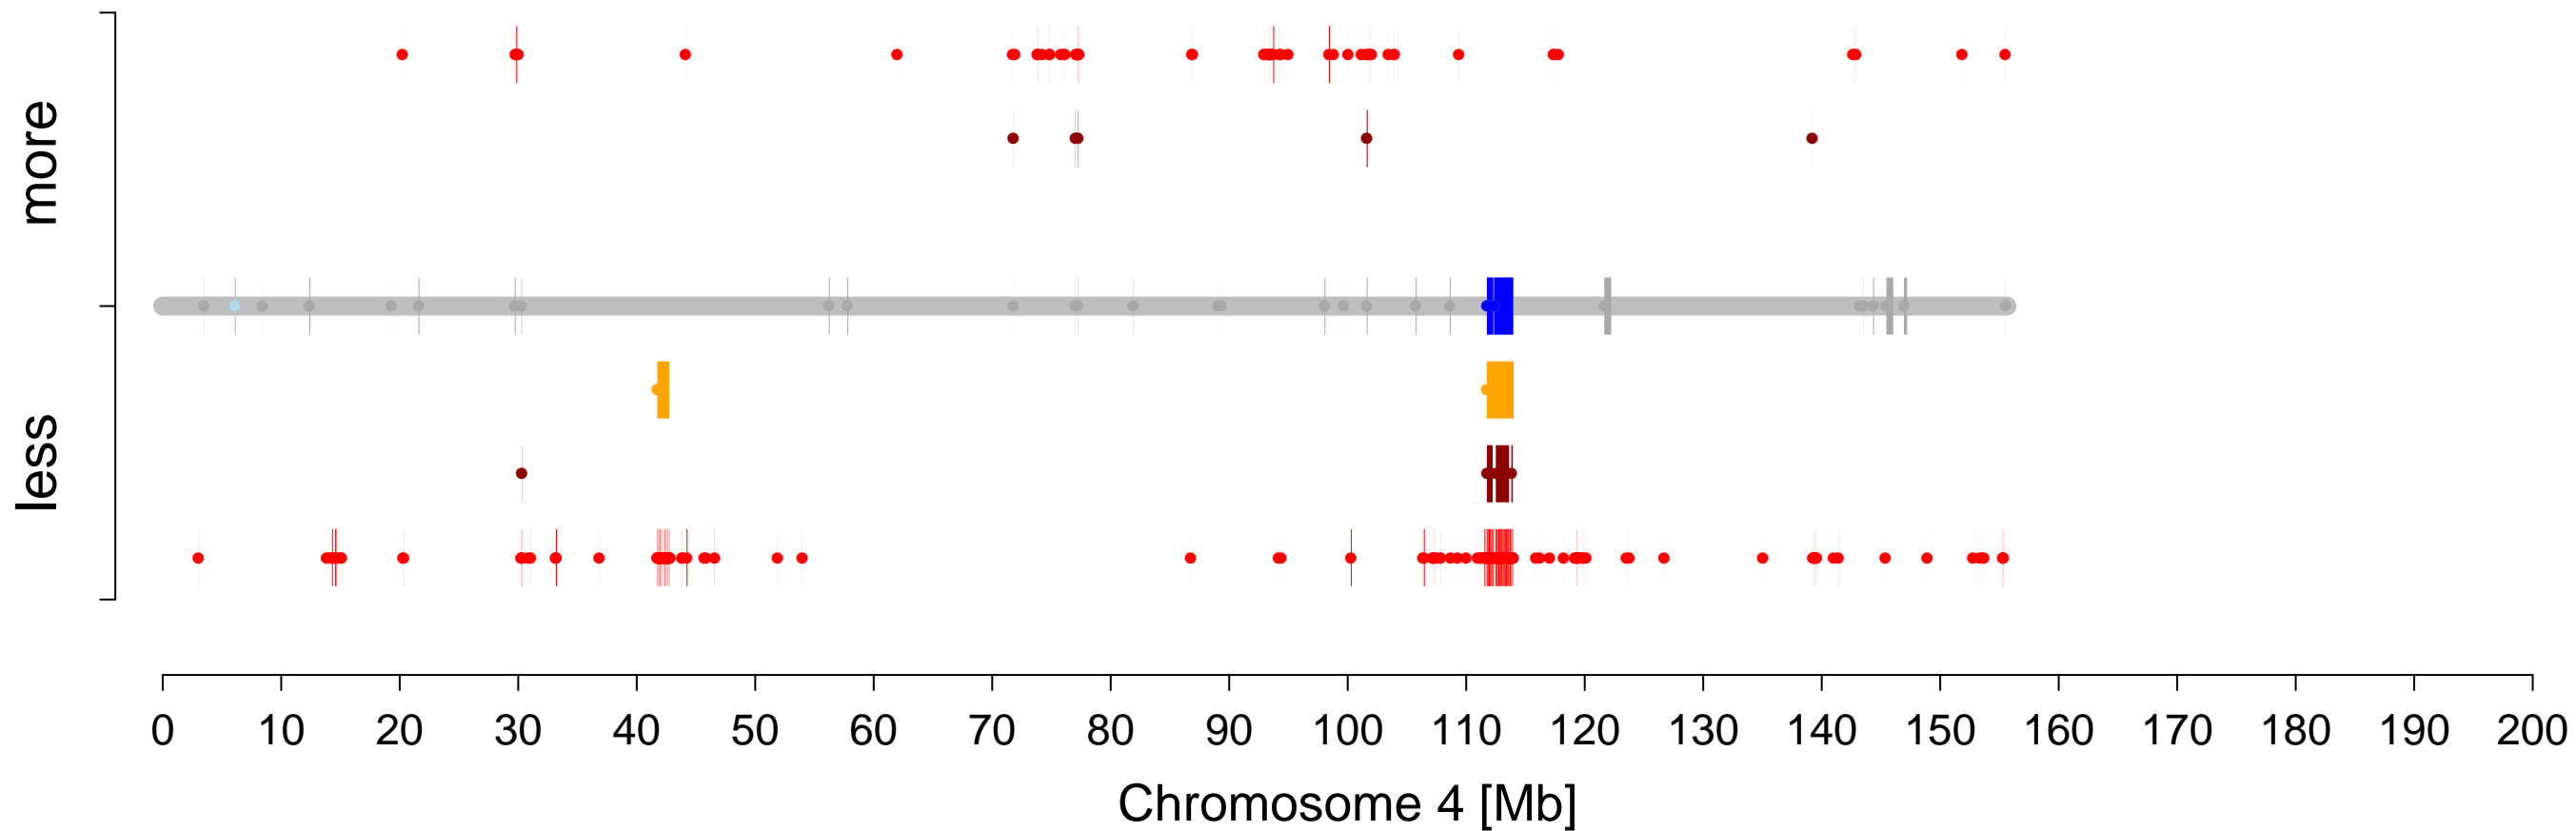

E)

Copies in HAB

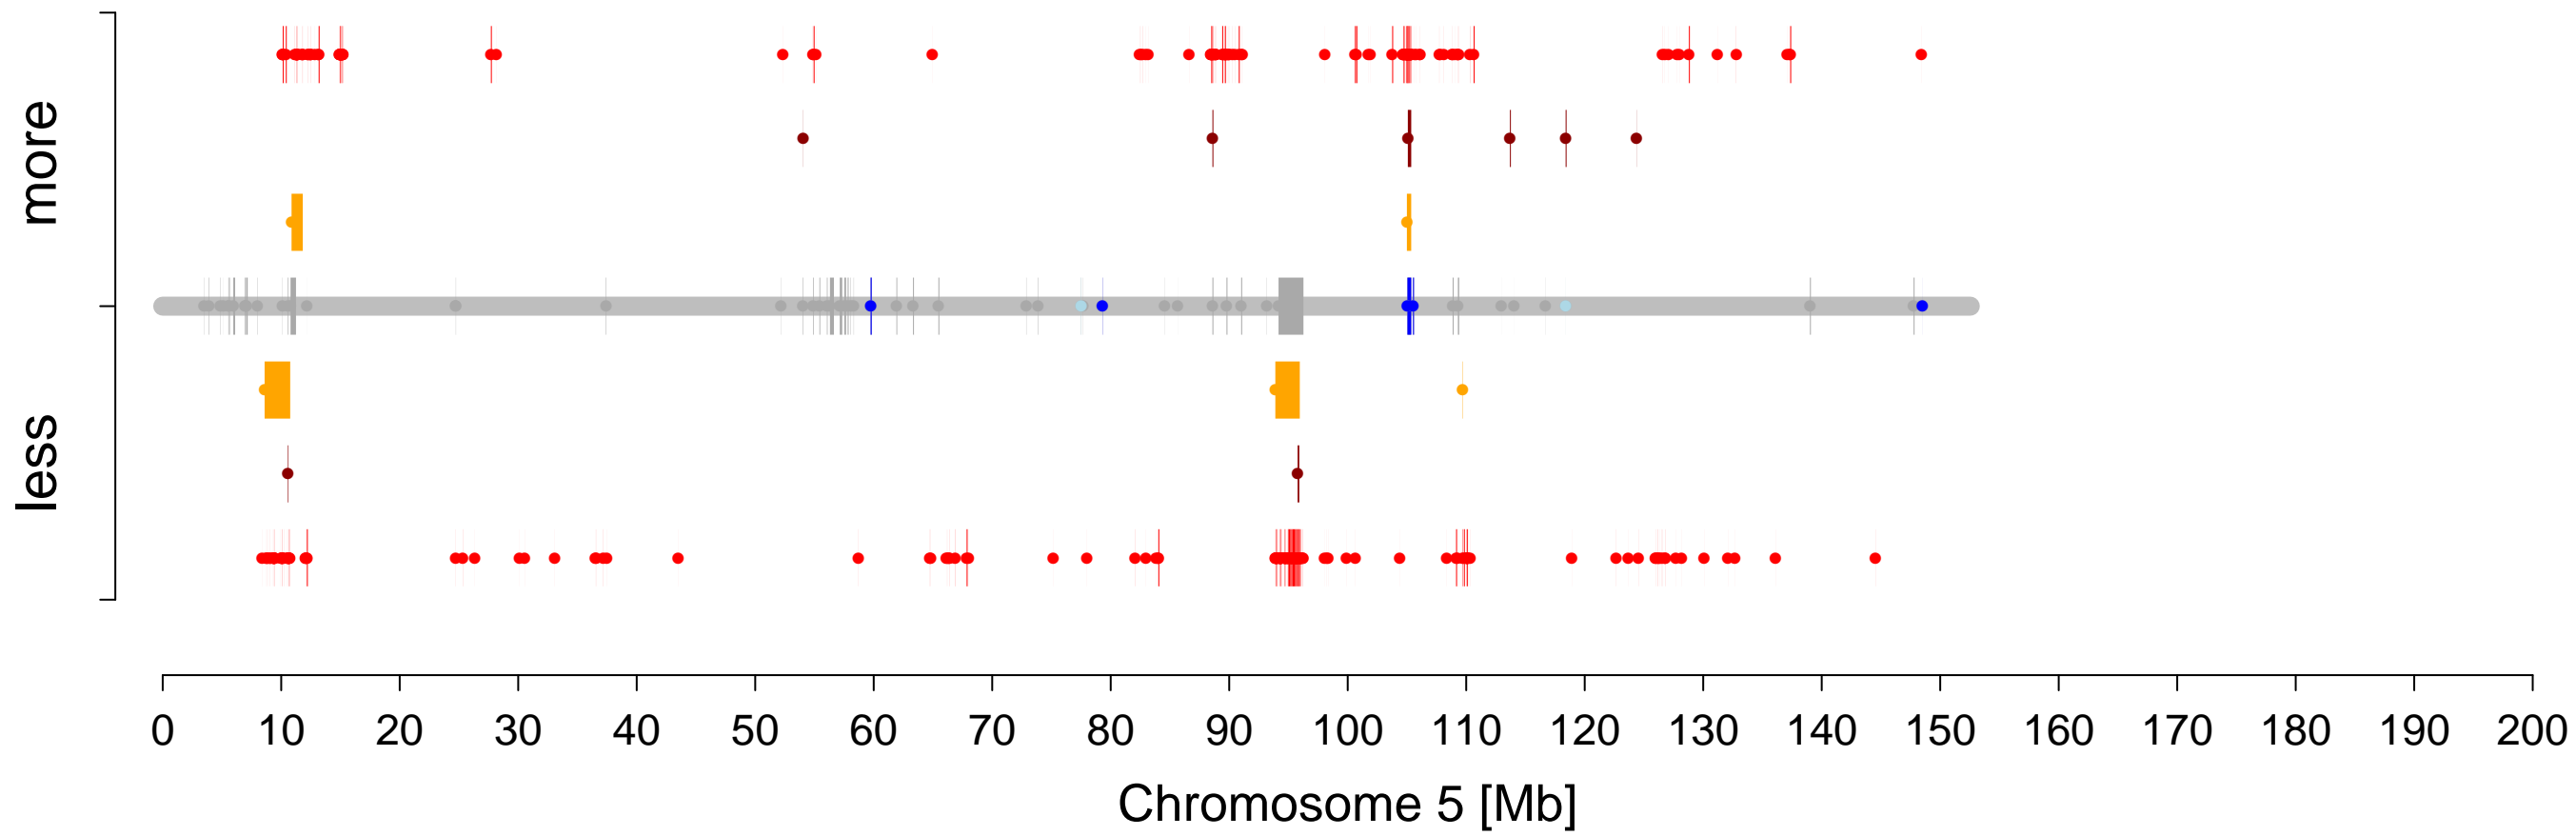

F)

Copies in HAB

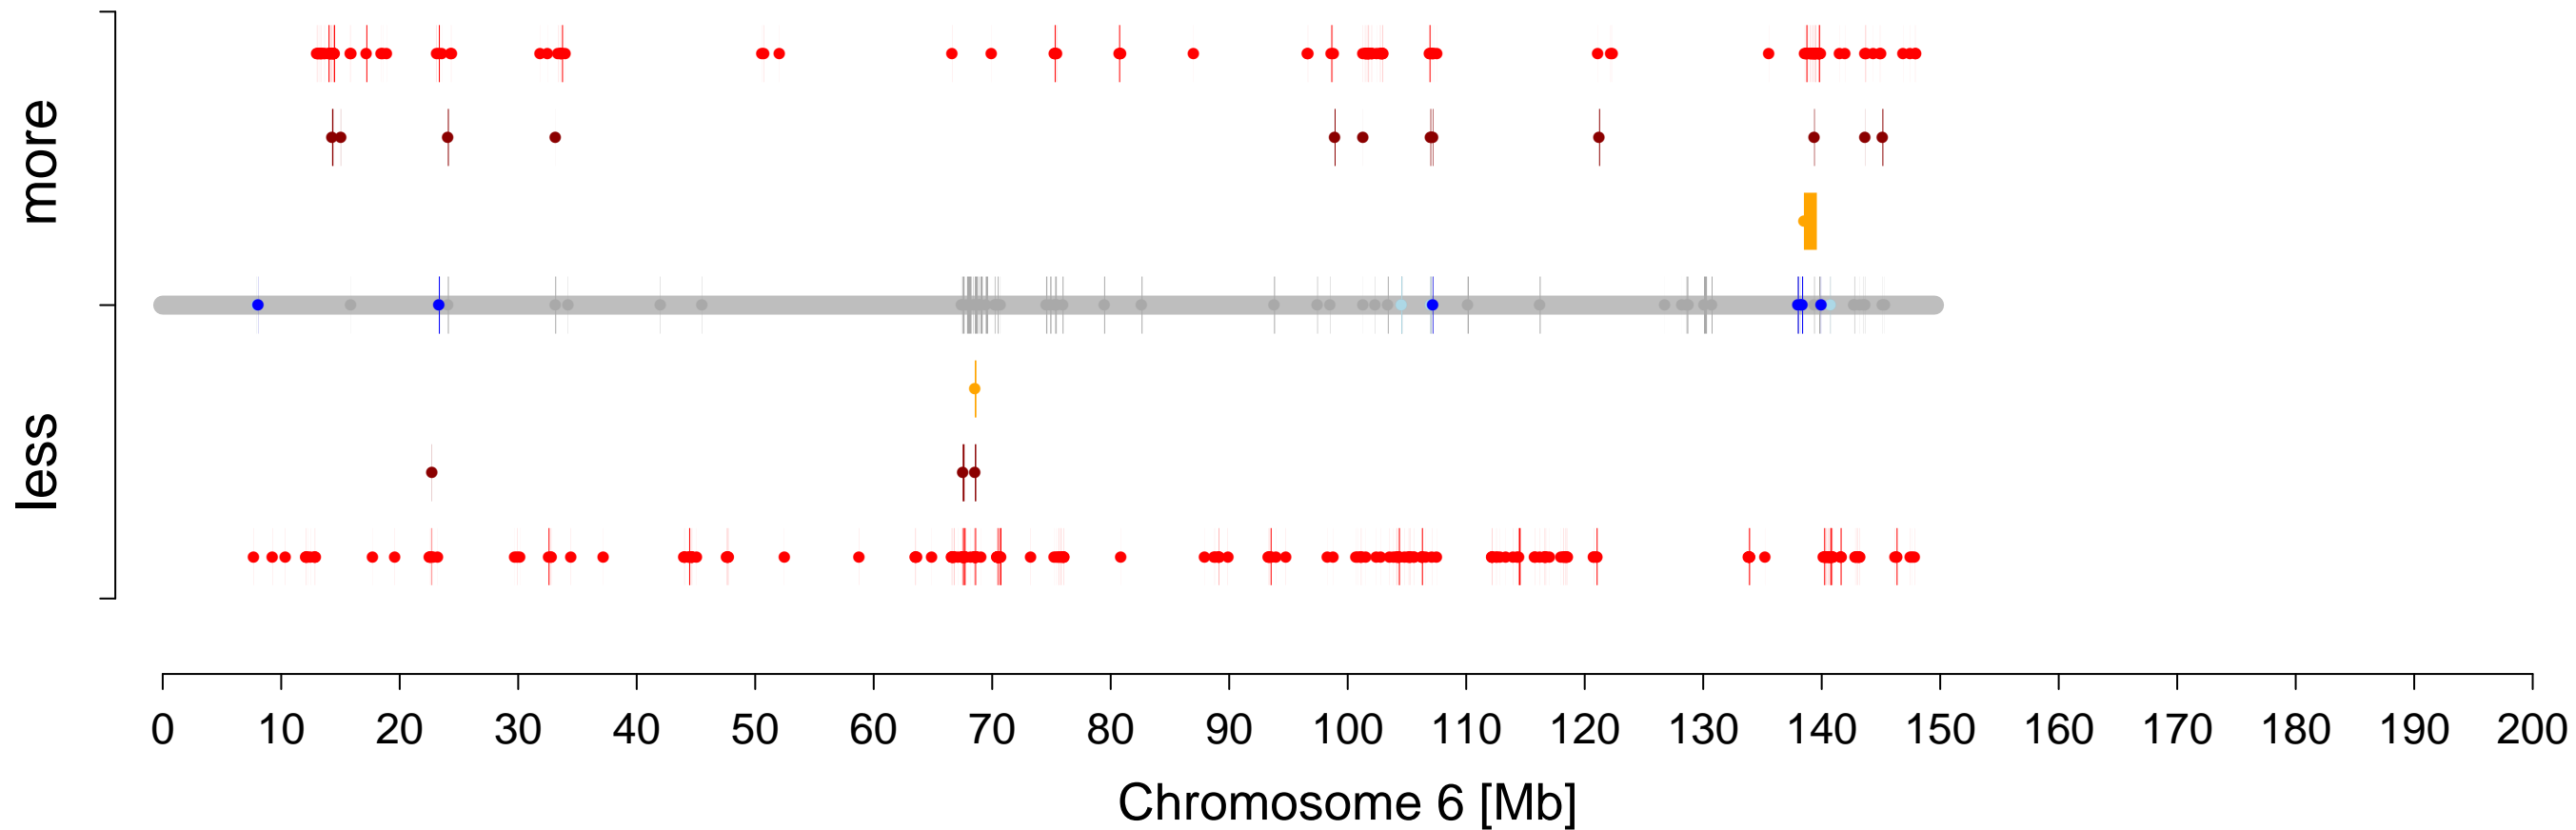

G)

Copies in HAB

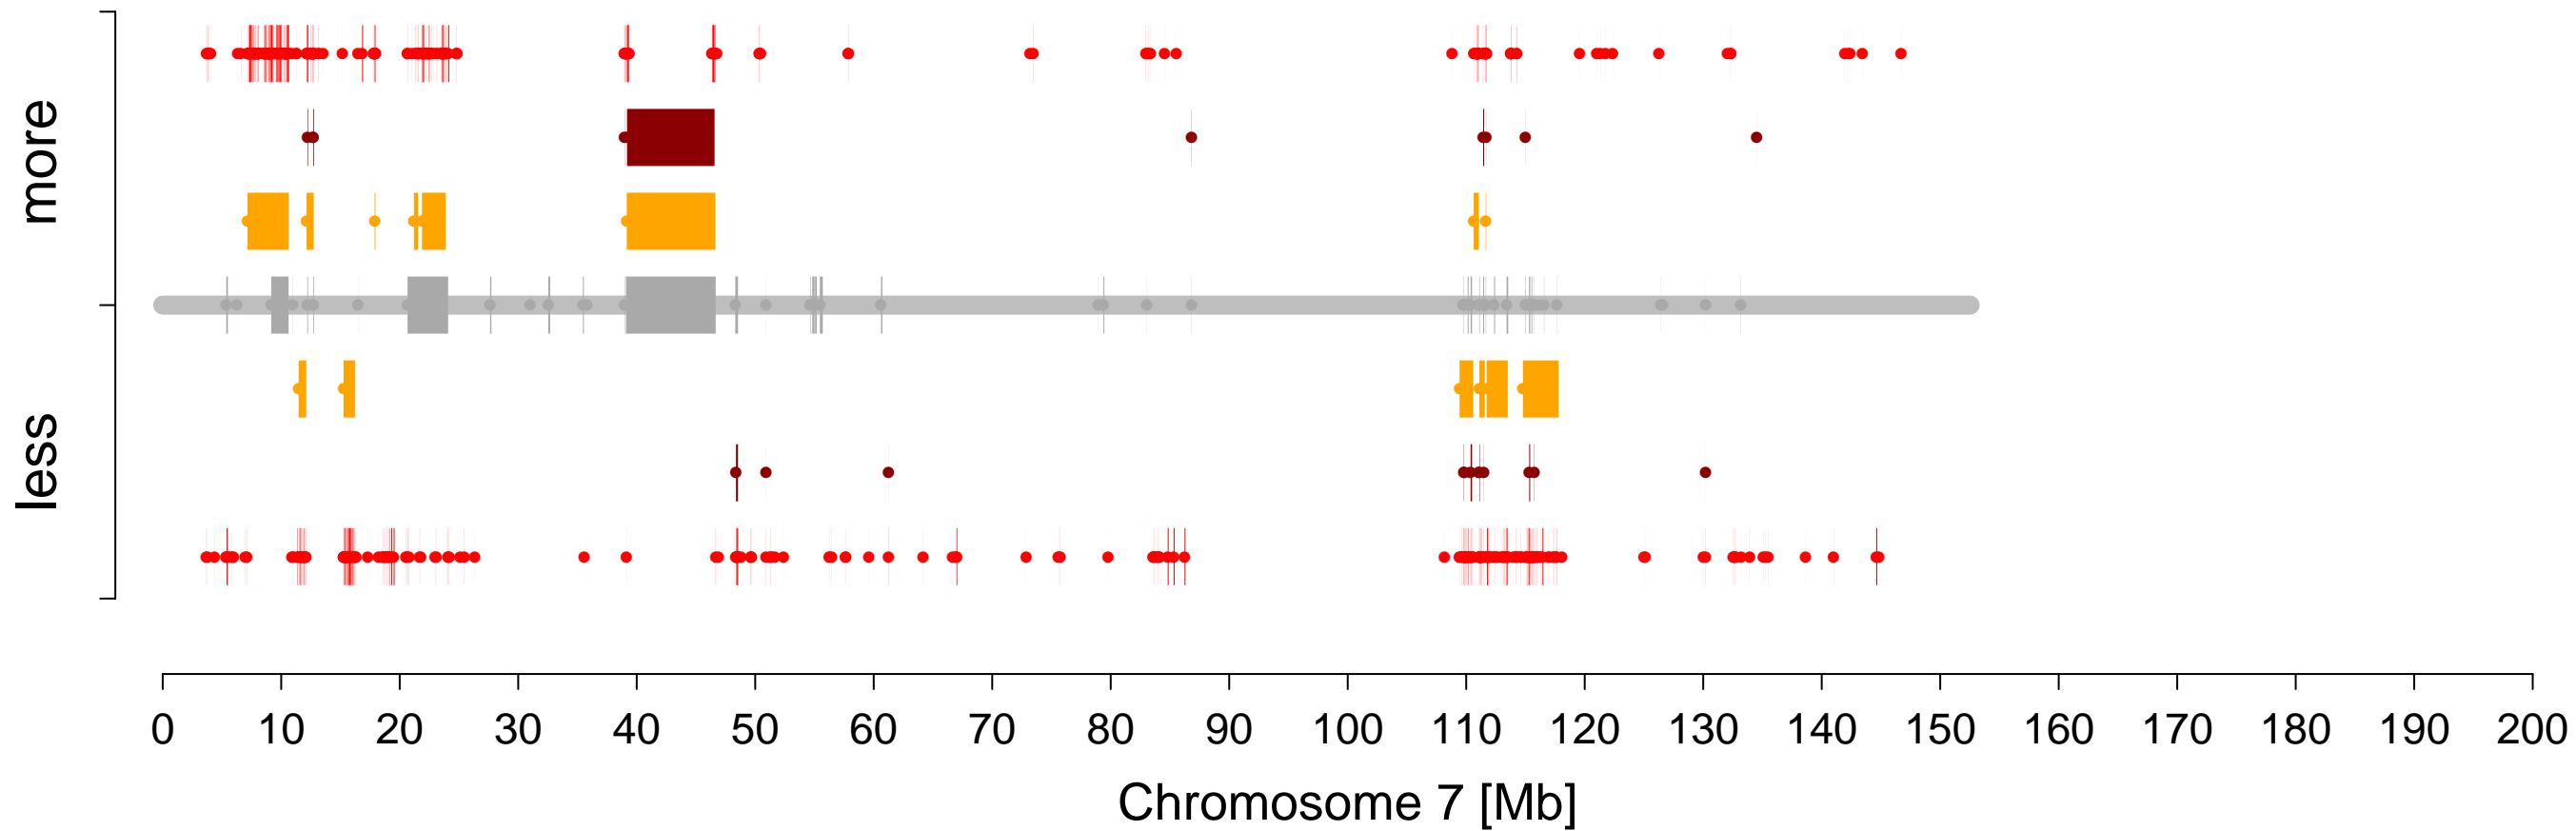

I)

Copies in HAB

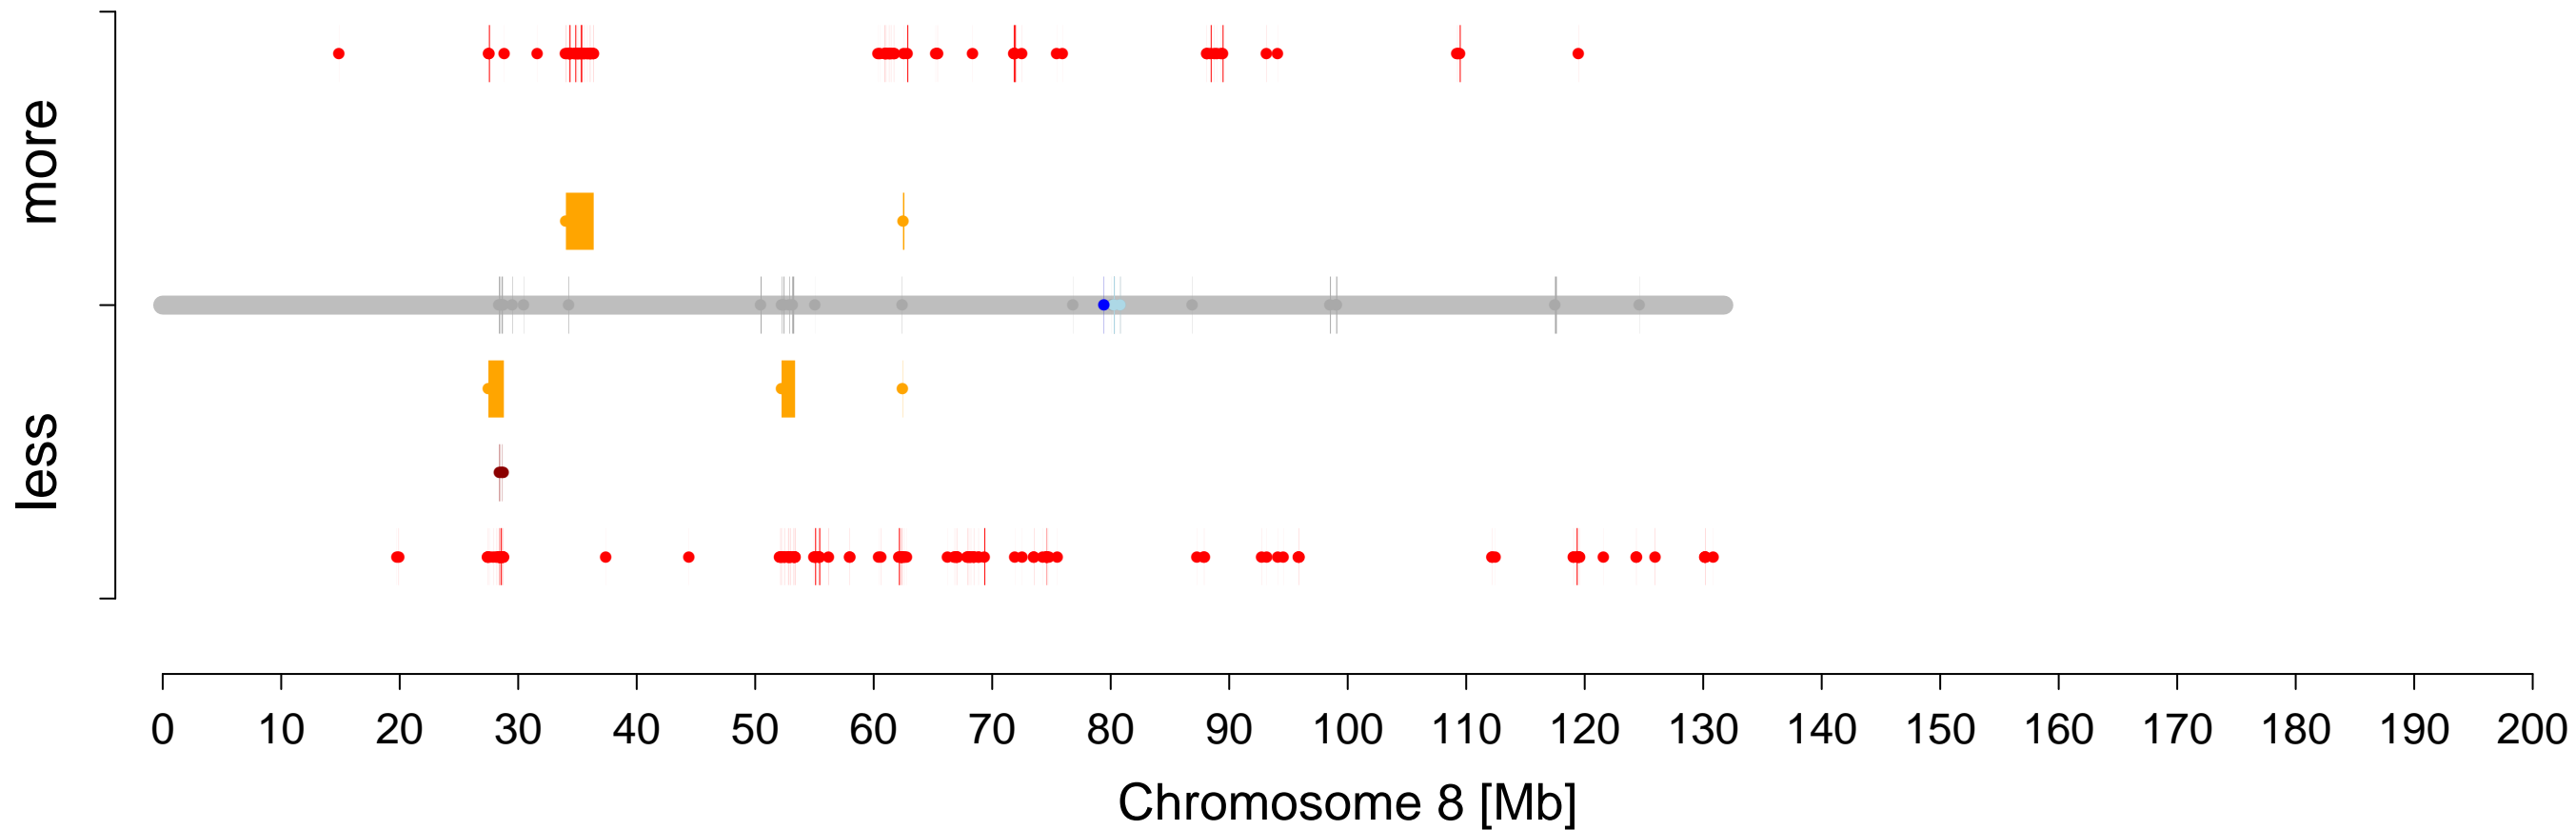



I)

Copies in HAB

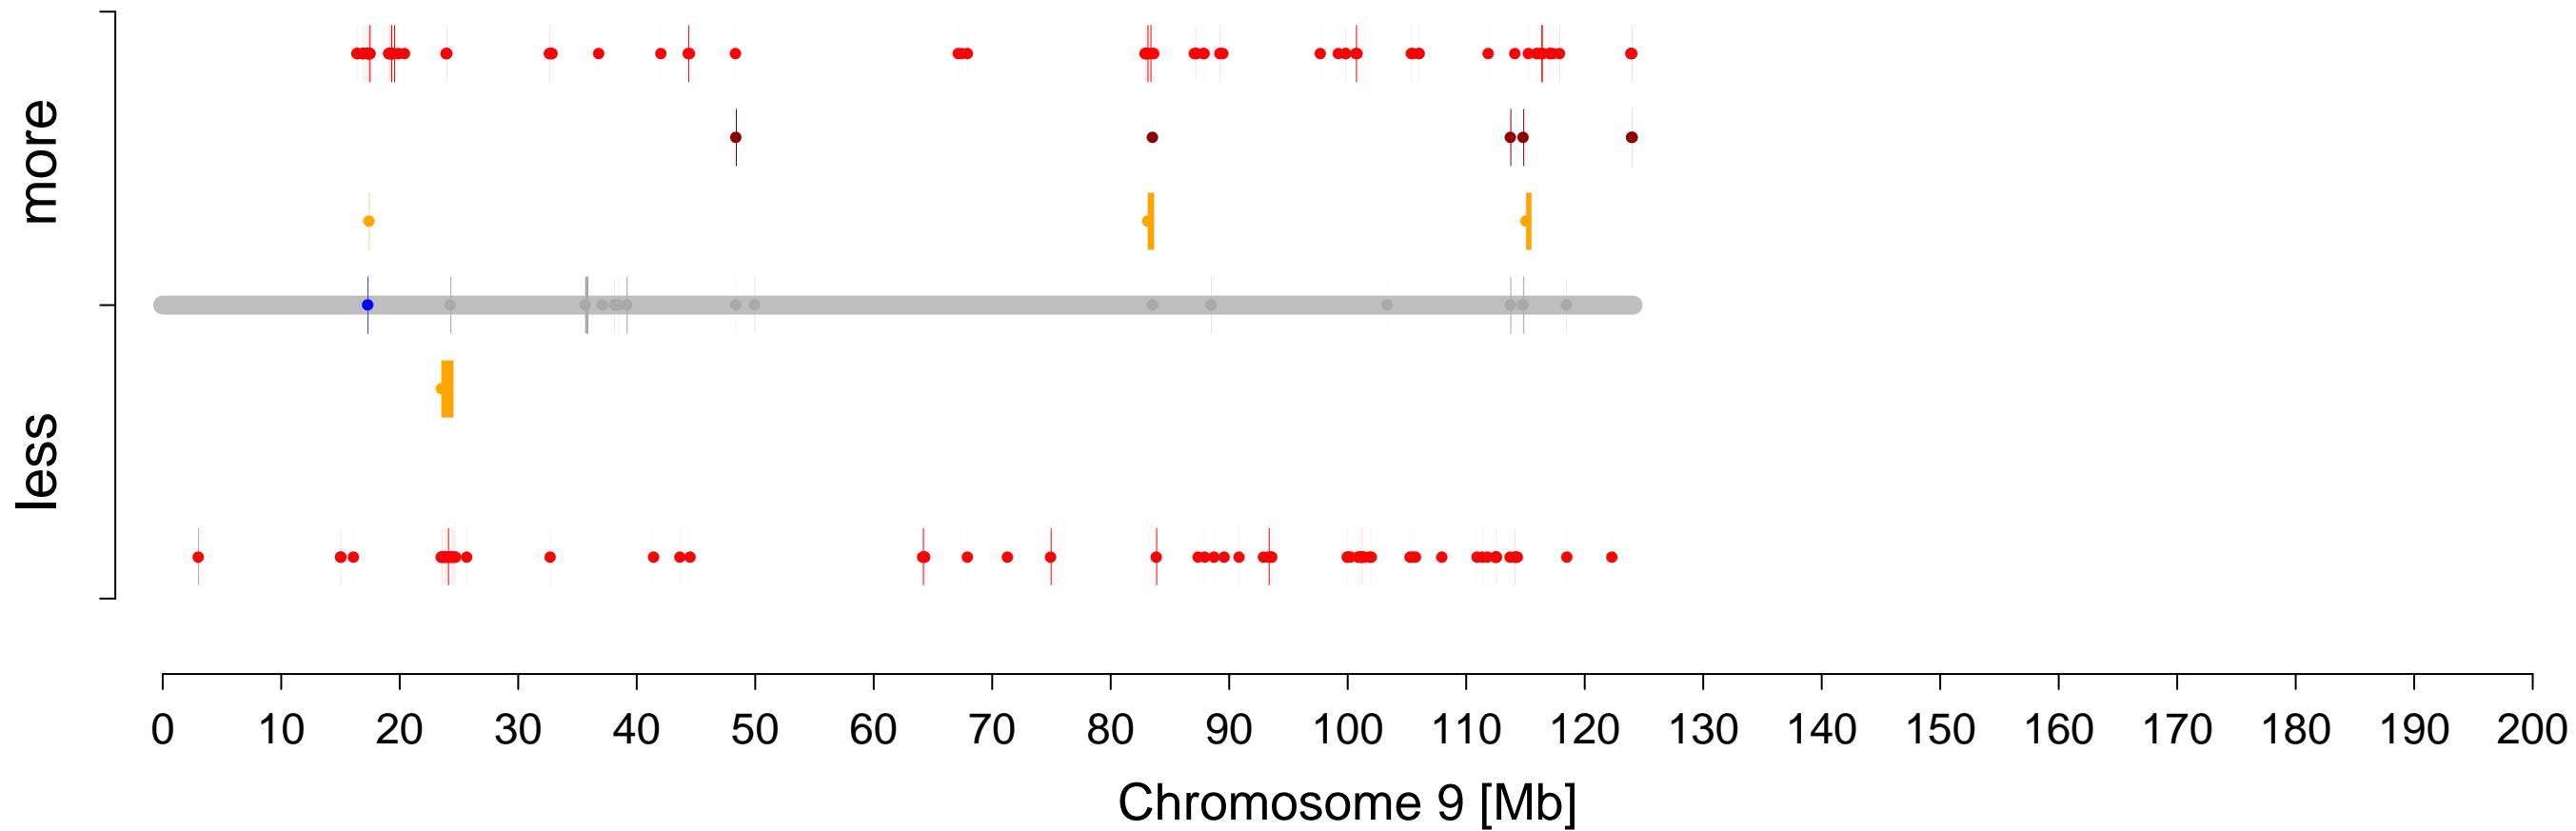

c)

Copies in HAB

more  
less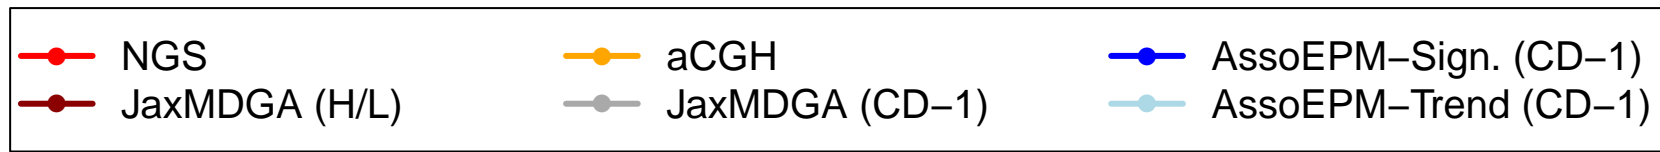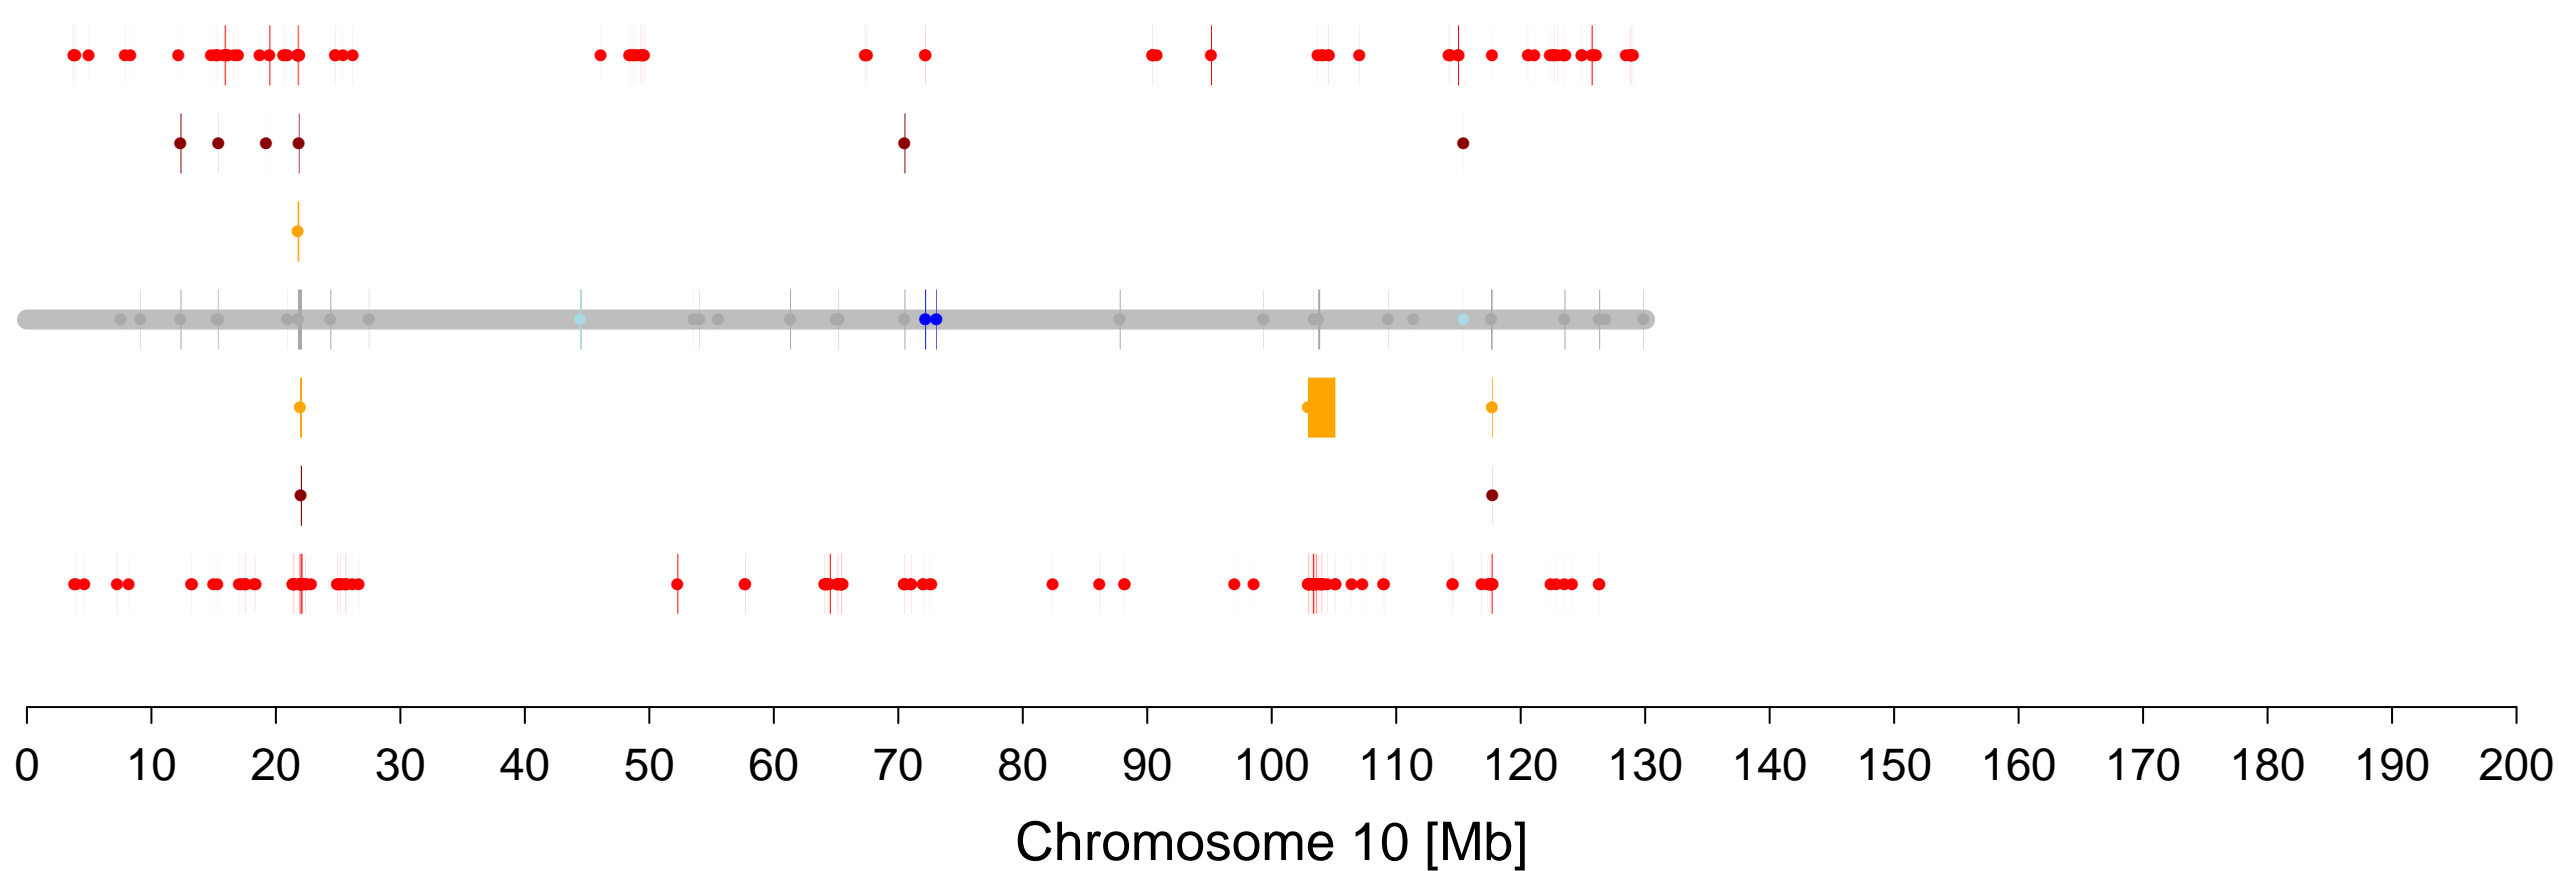

K)

Copies in HAB

less  
more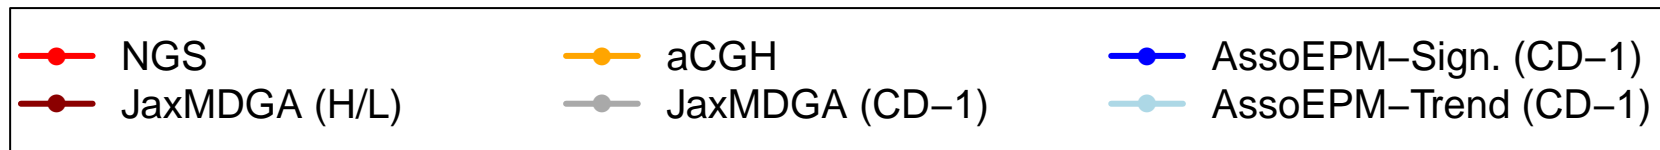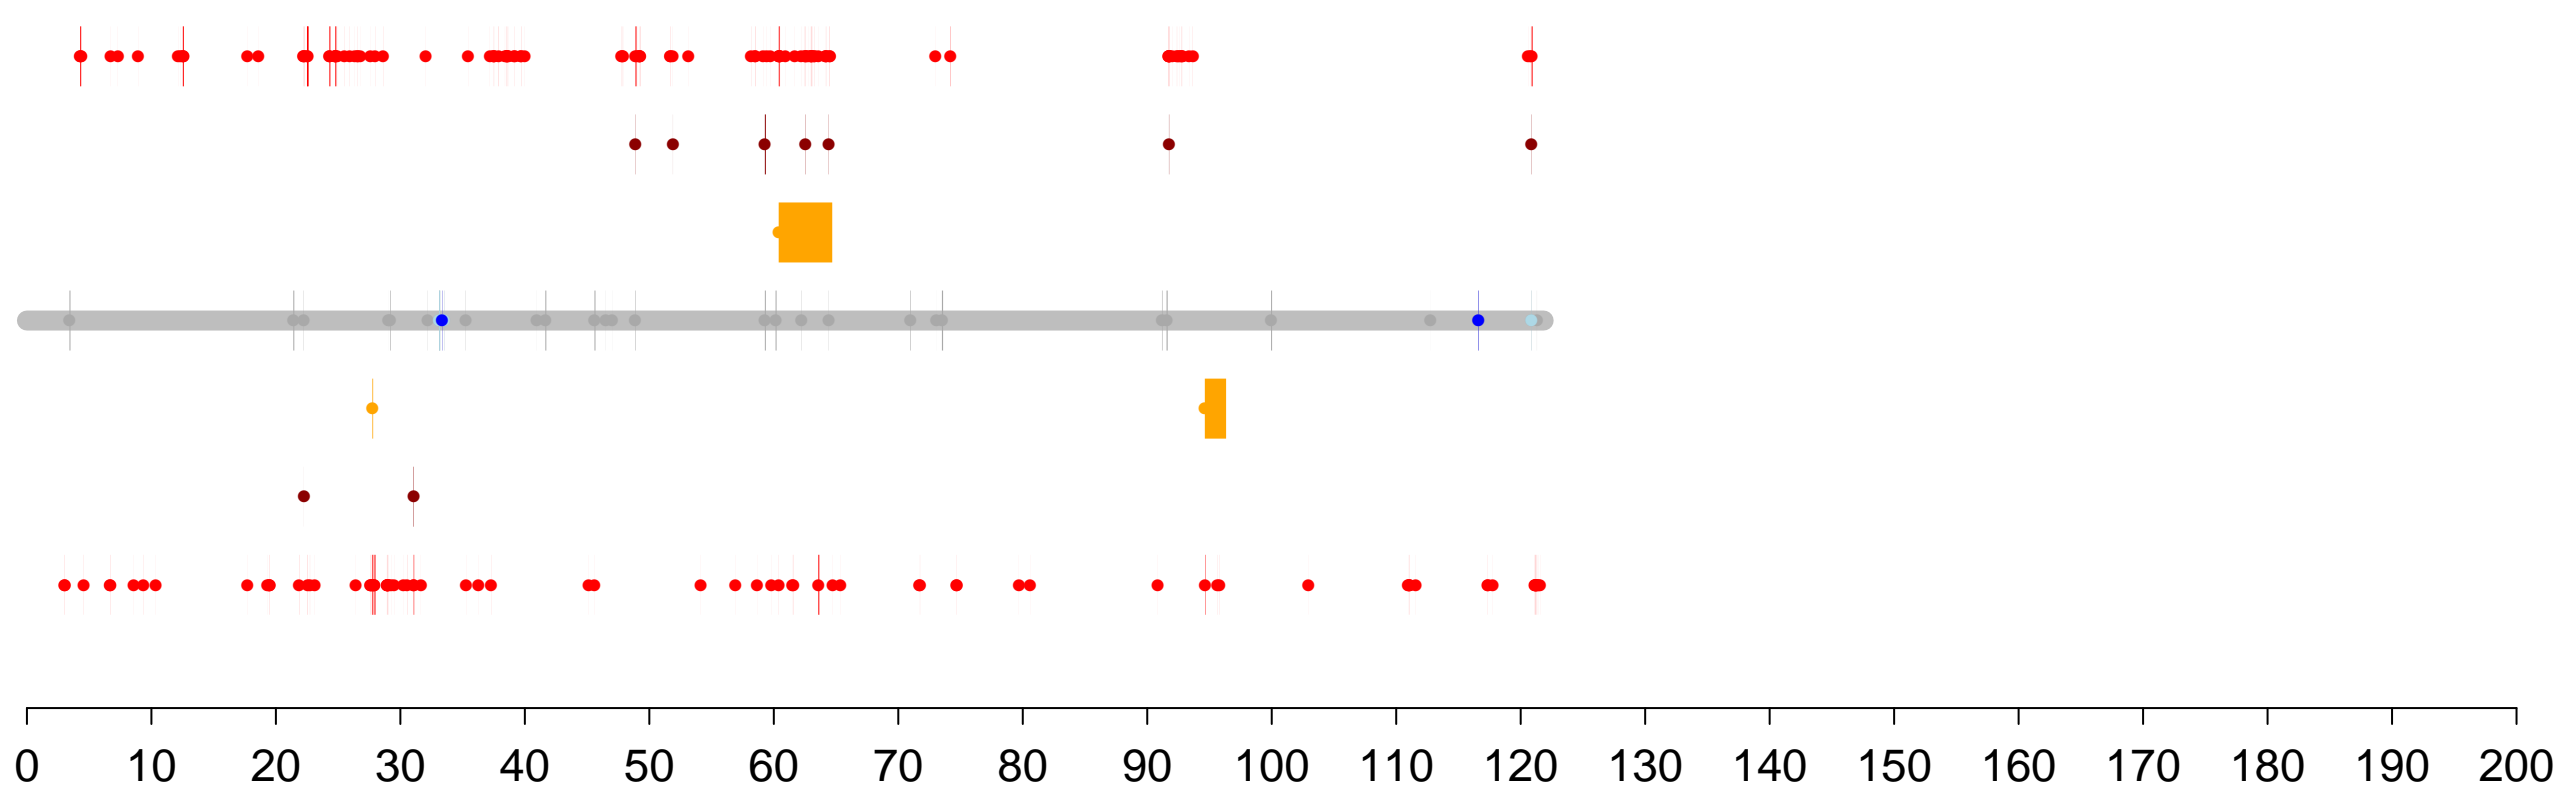

Γ)

Copies in HAB

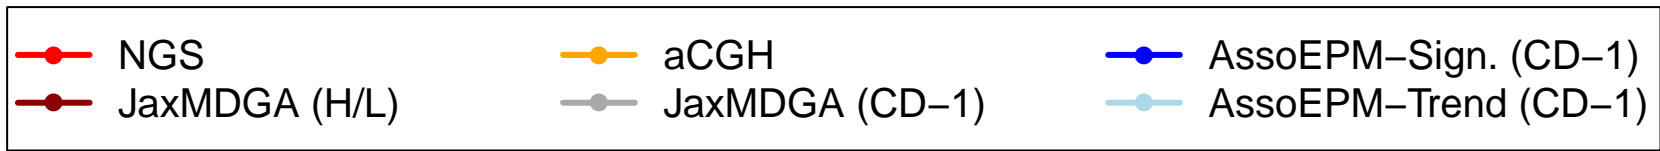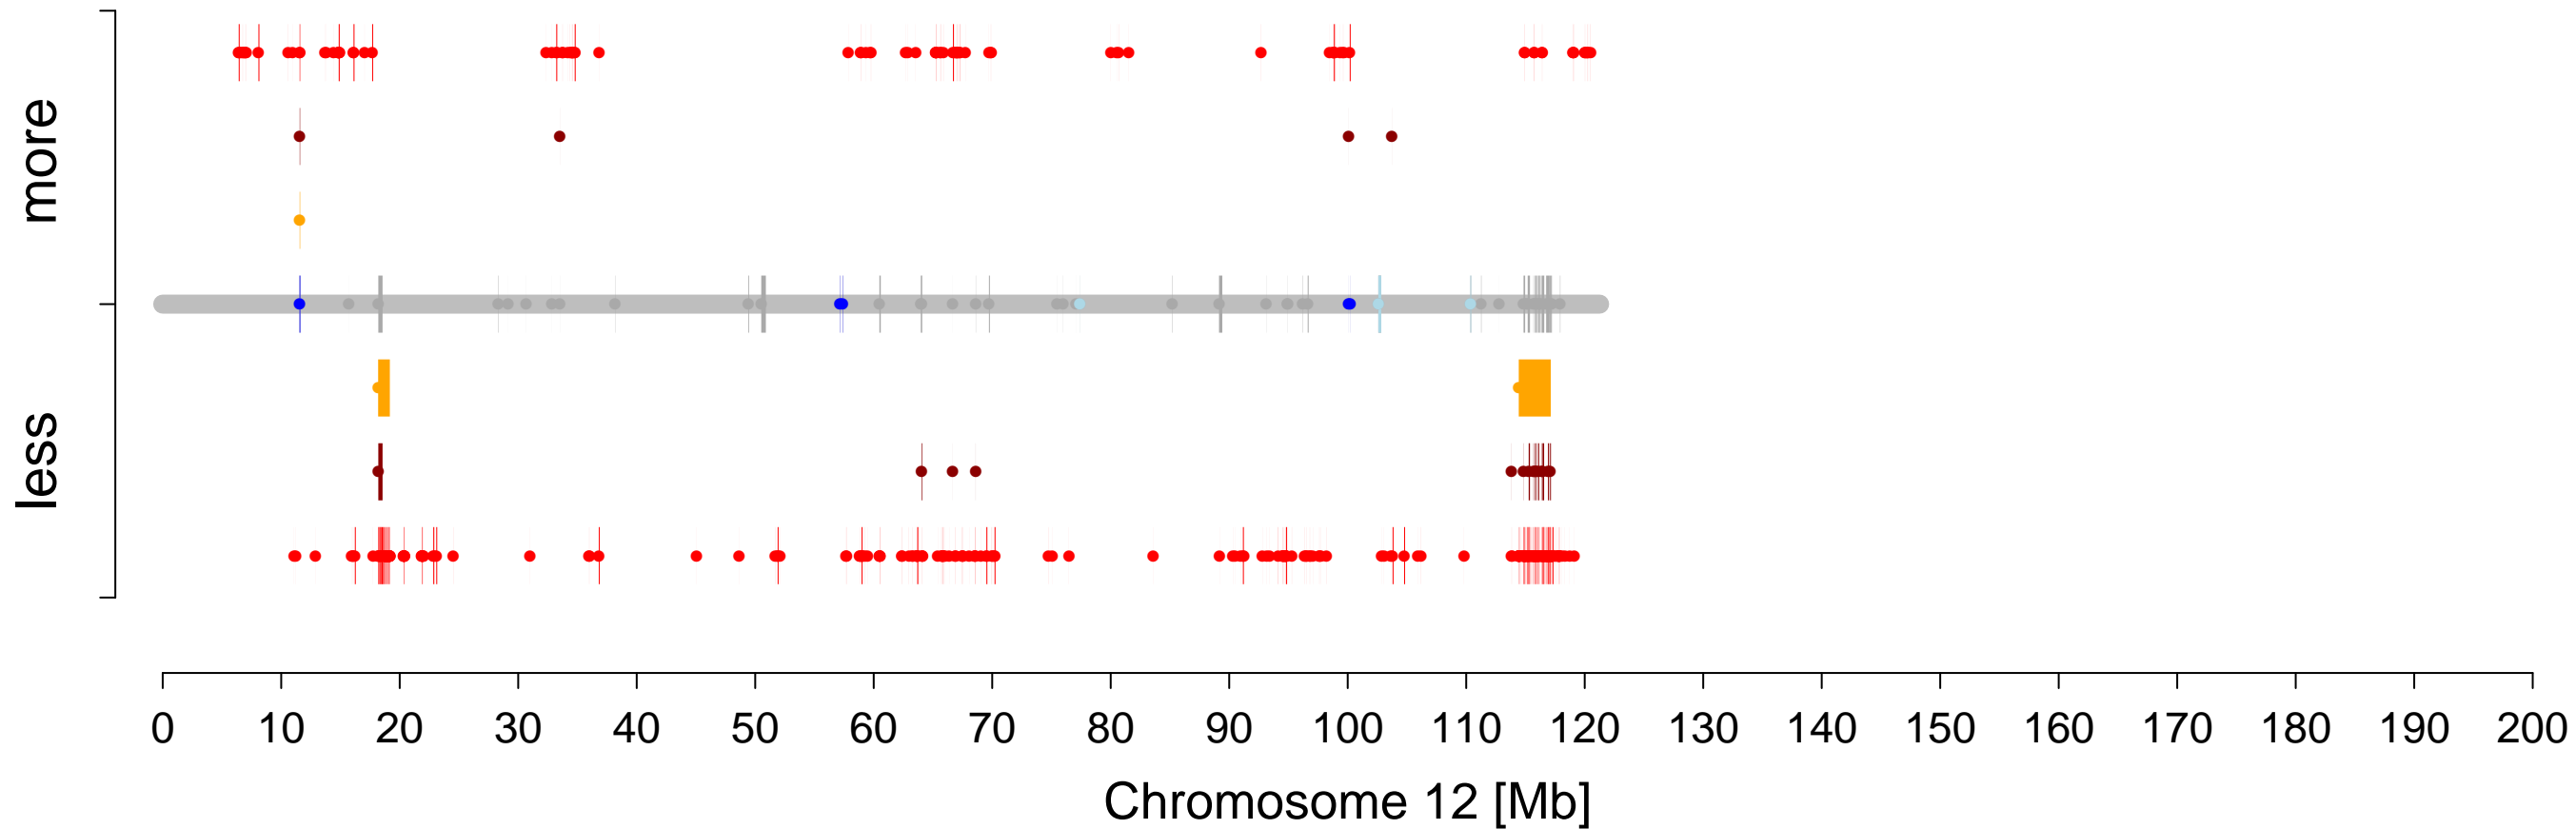

M)

Copies in HAB

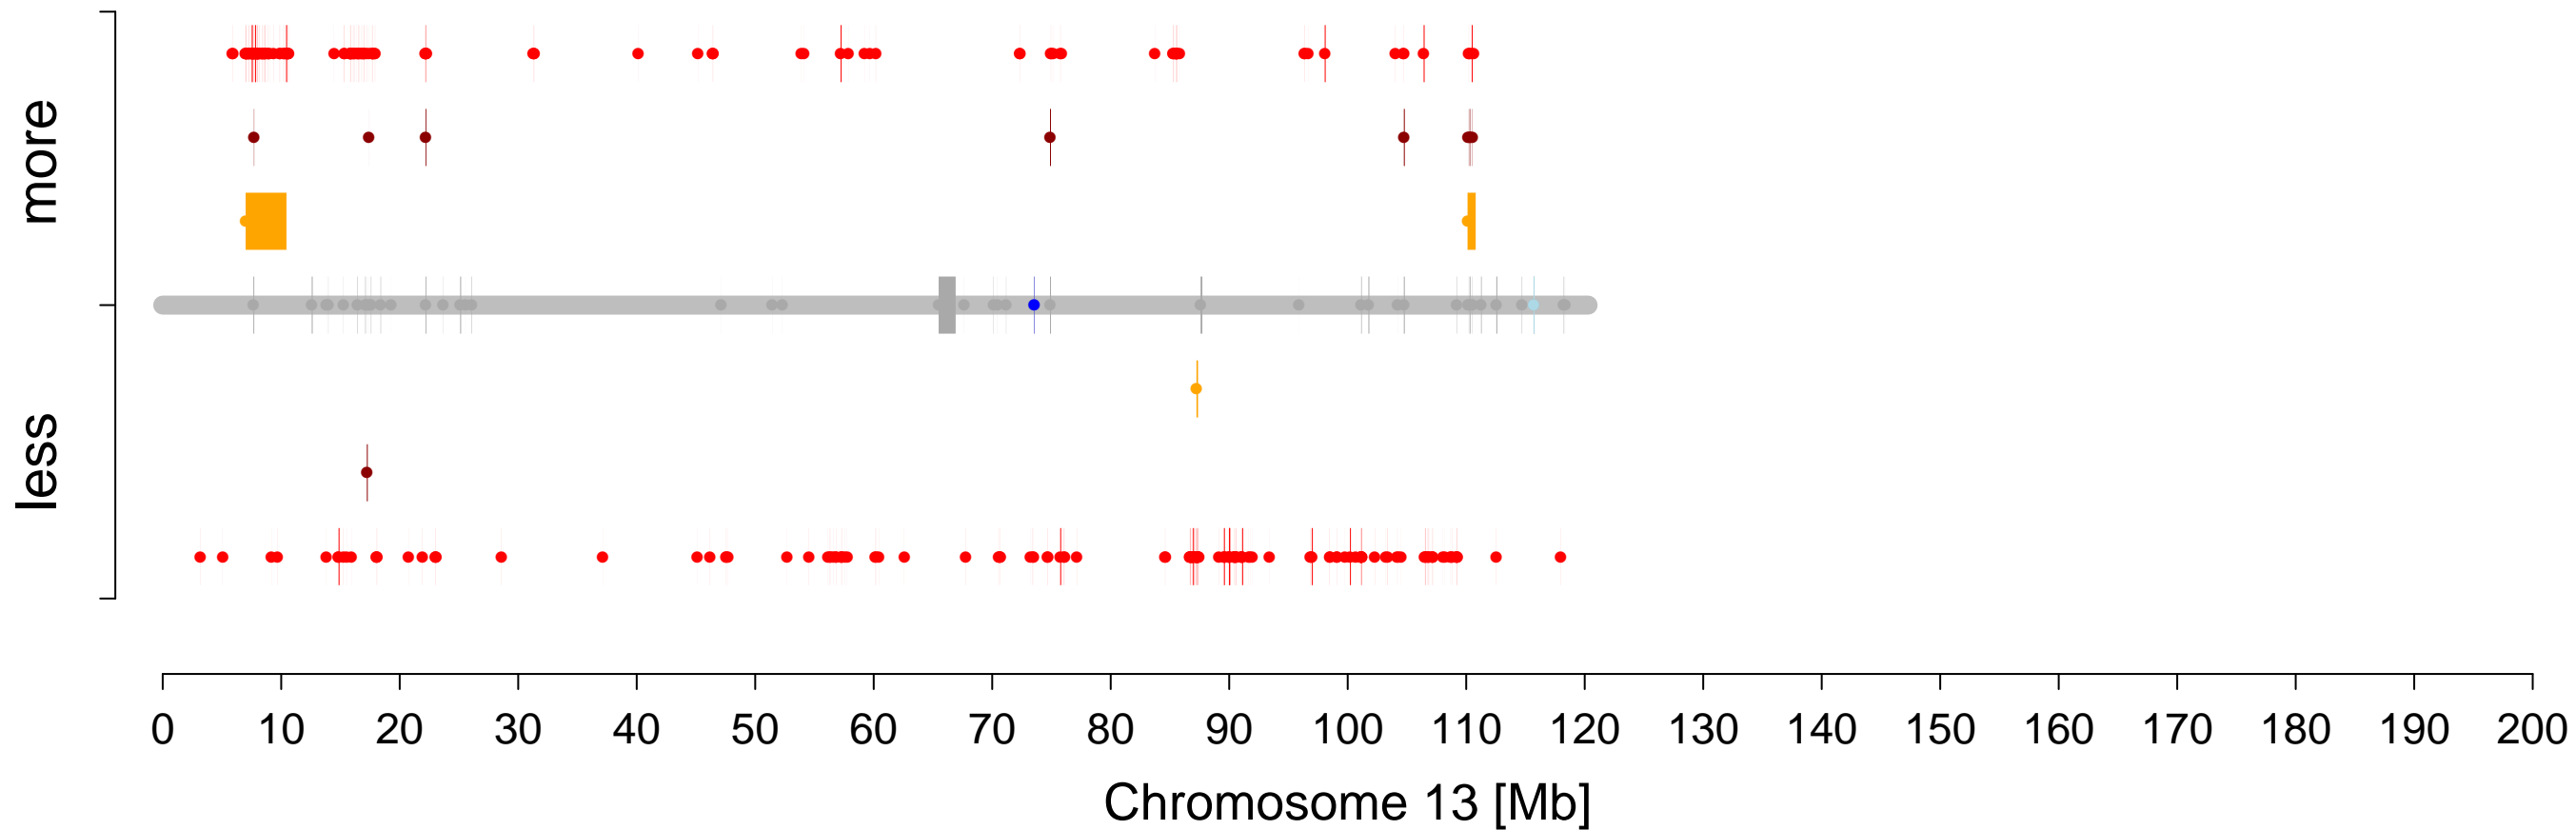

N)

Copies in HAB

less  
more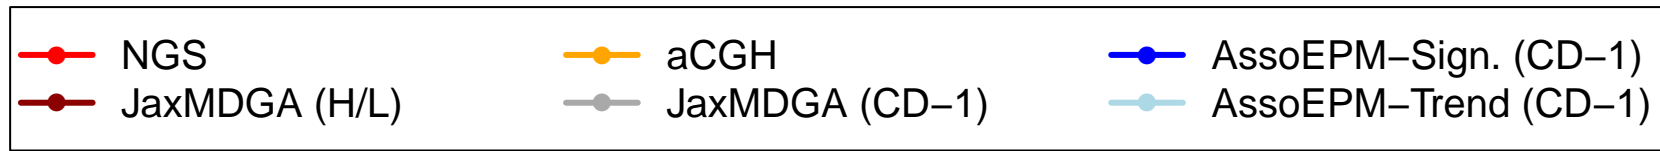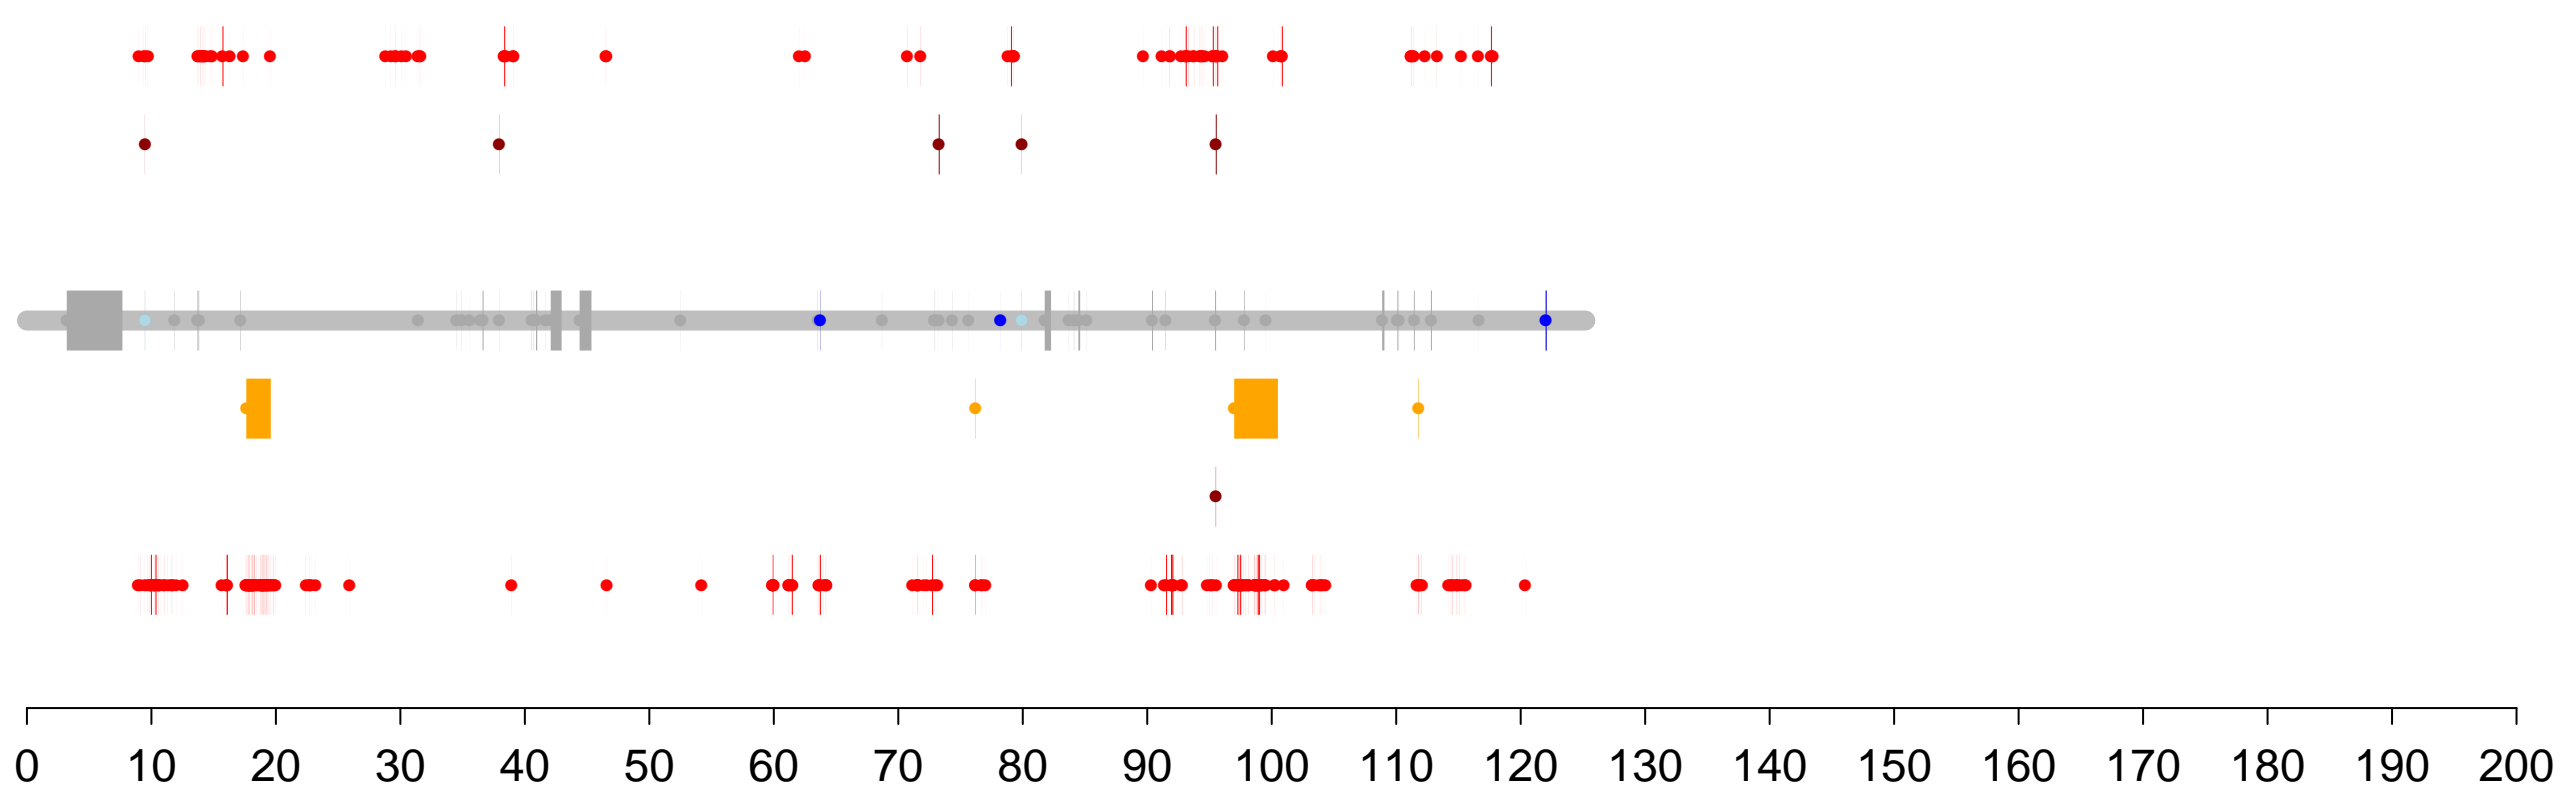

O)

Copies in HAB

less  
more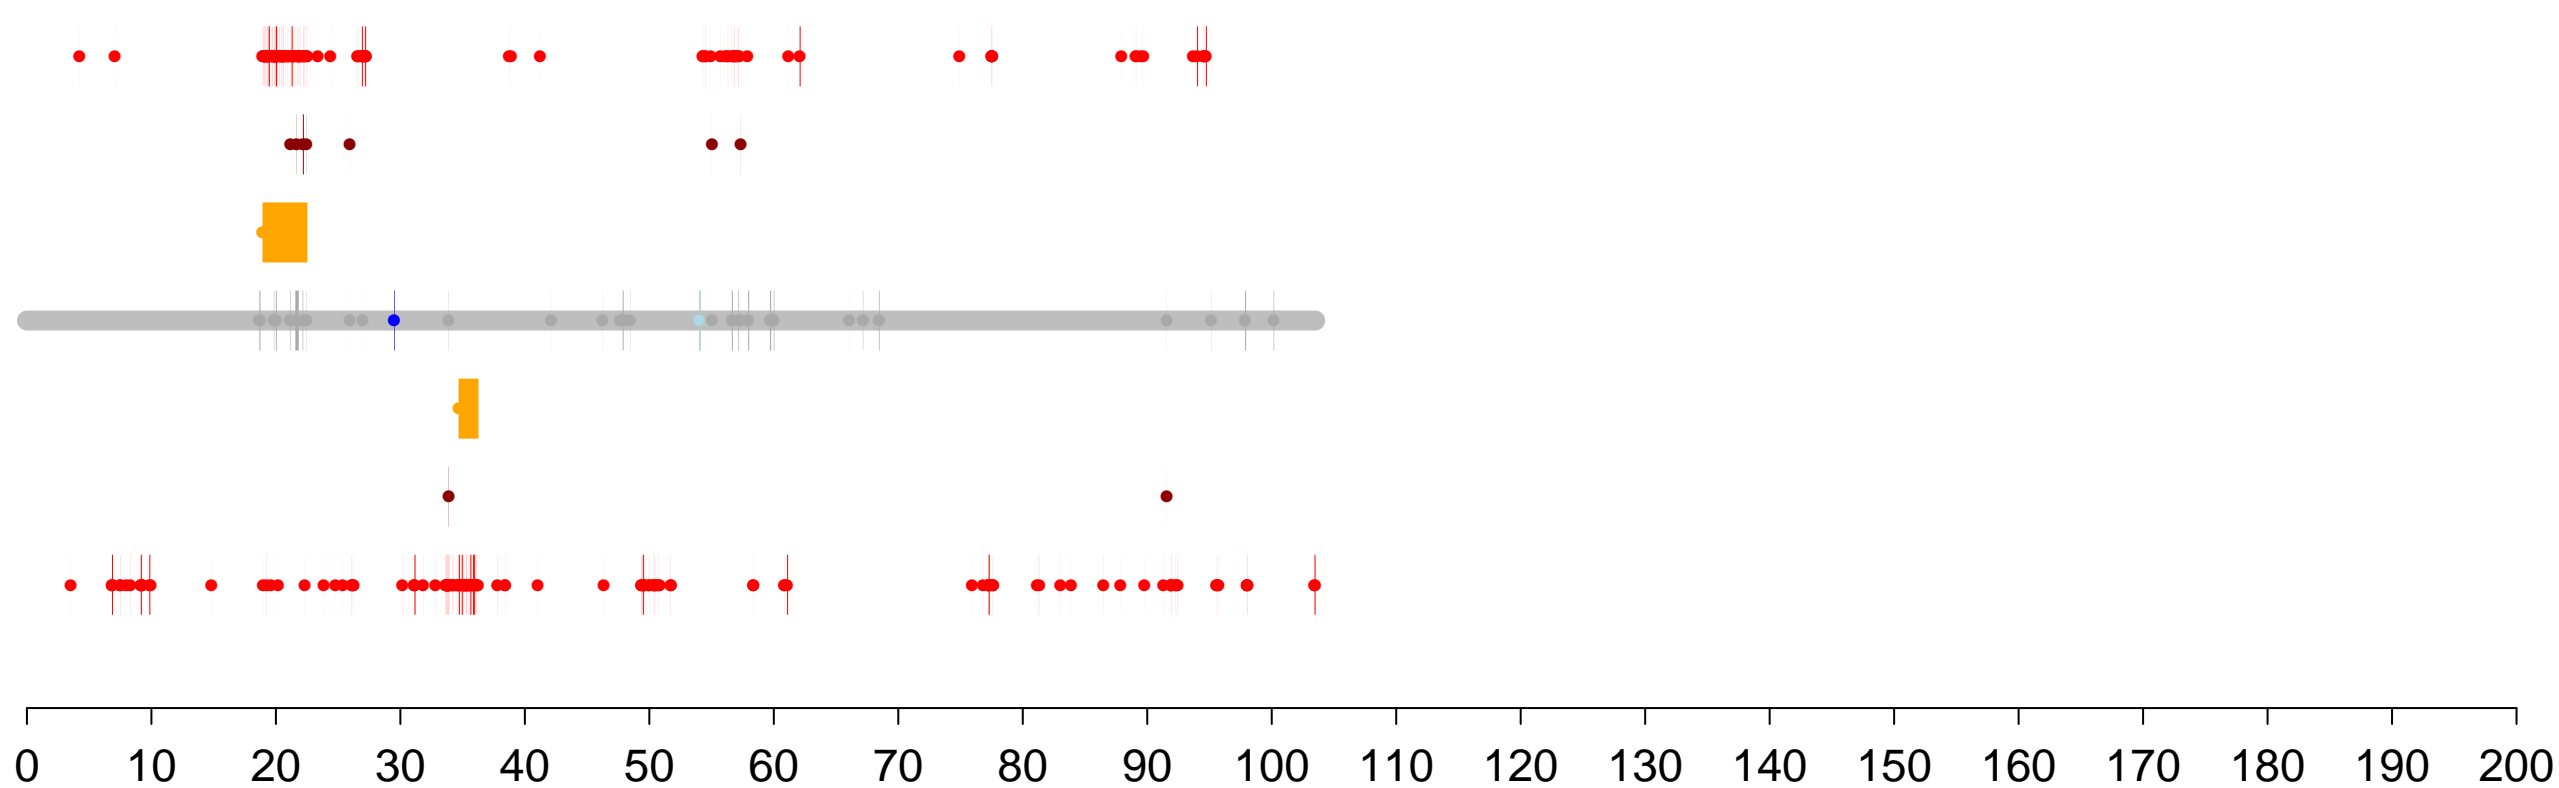

Chromosome 15 [Mb]

P)

Copies in HAB

more  
less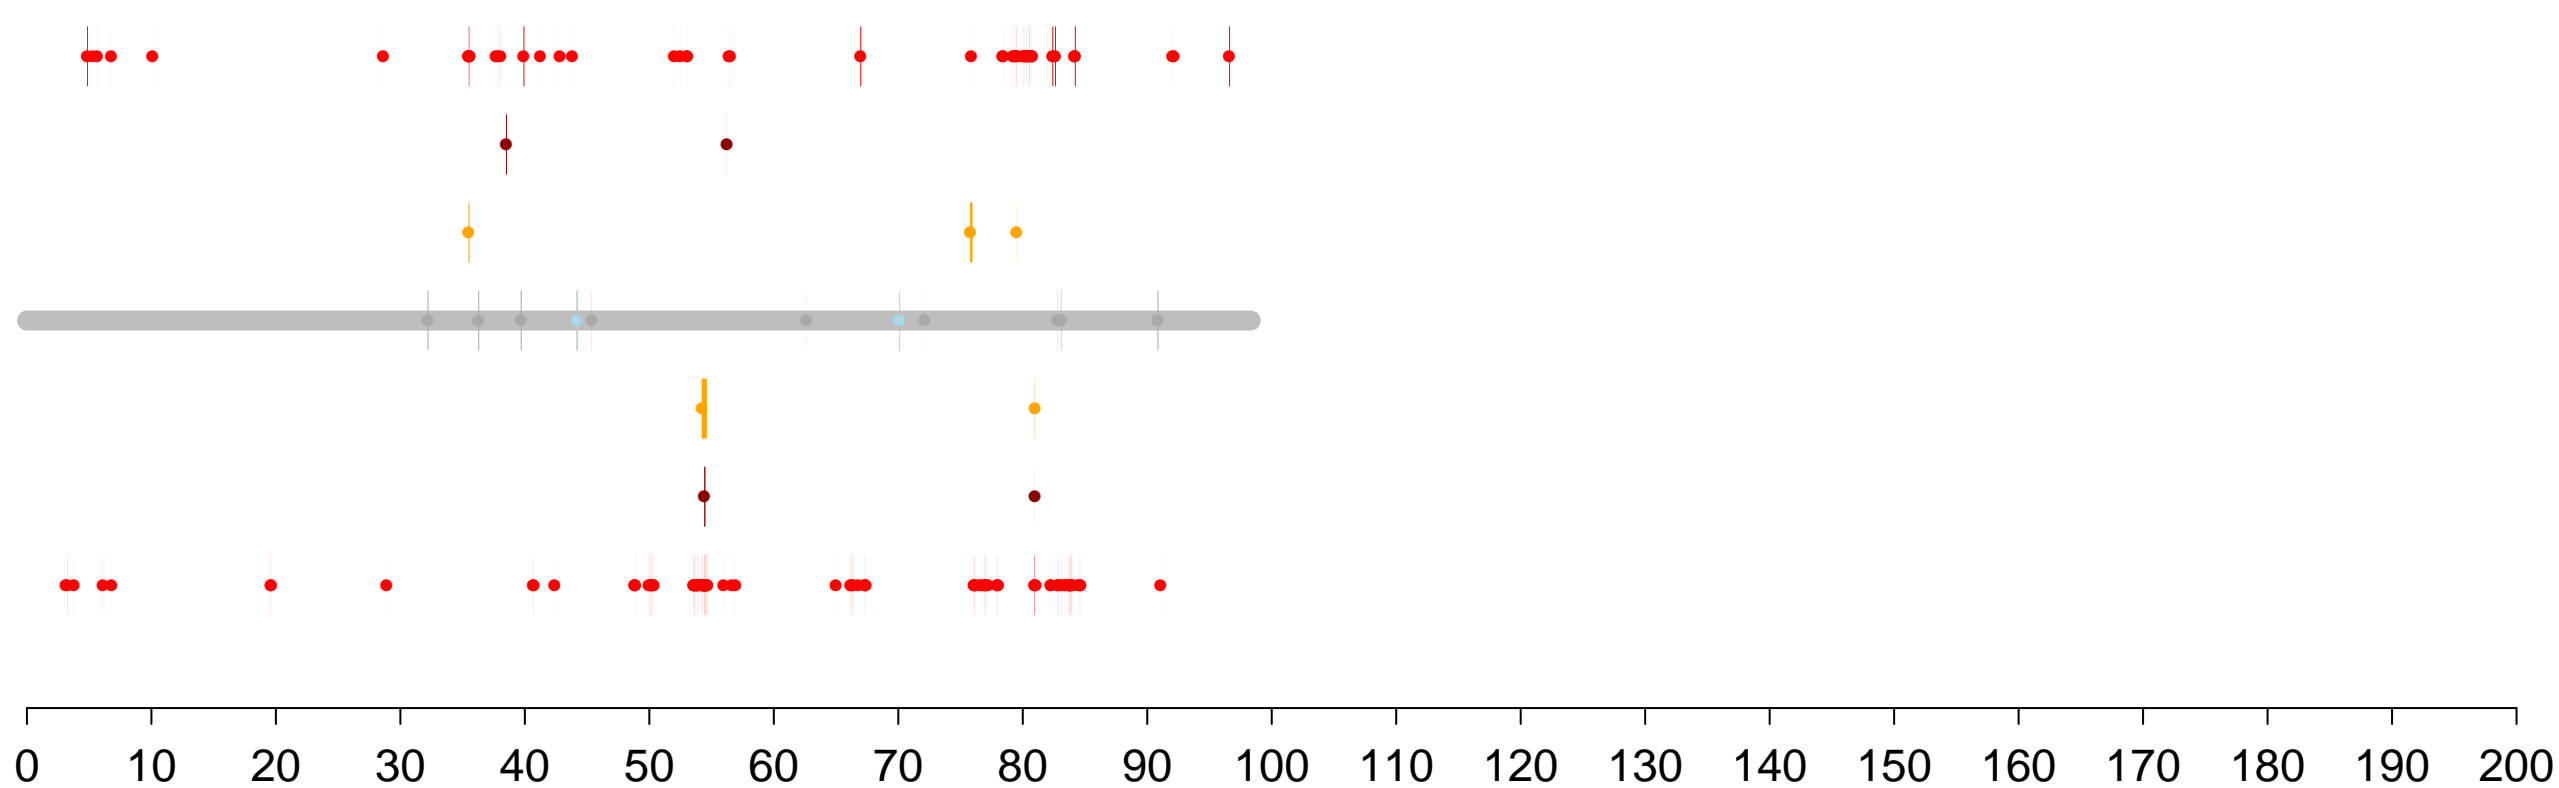

Chromosome 16 [Mb]



Q)

Copies in HAB

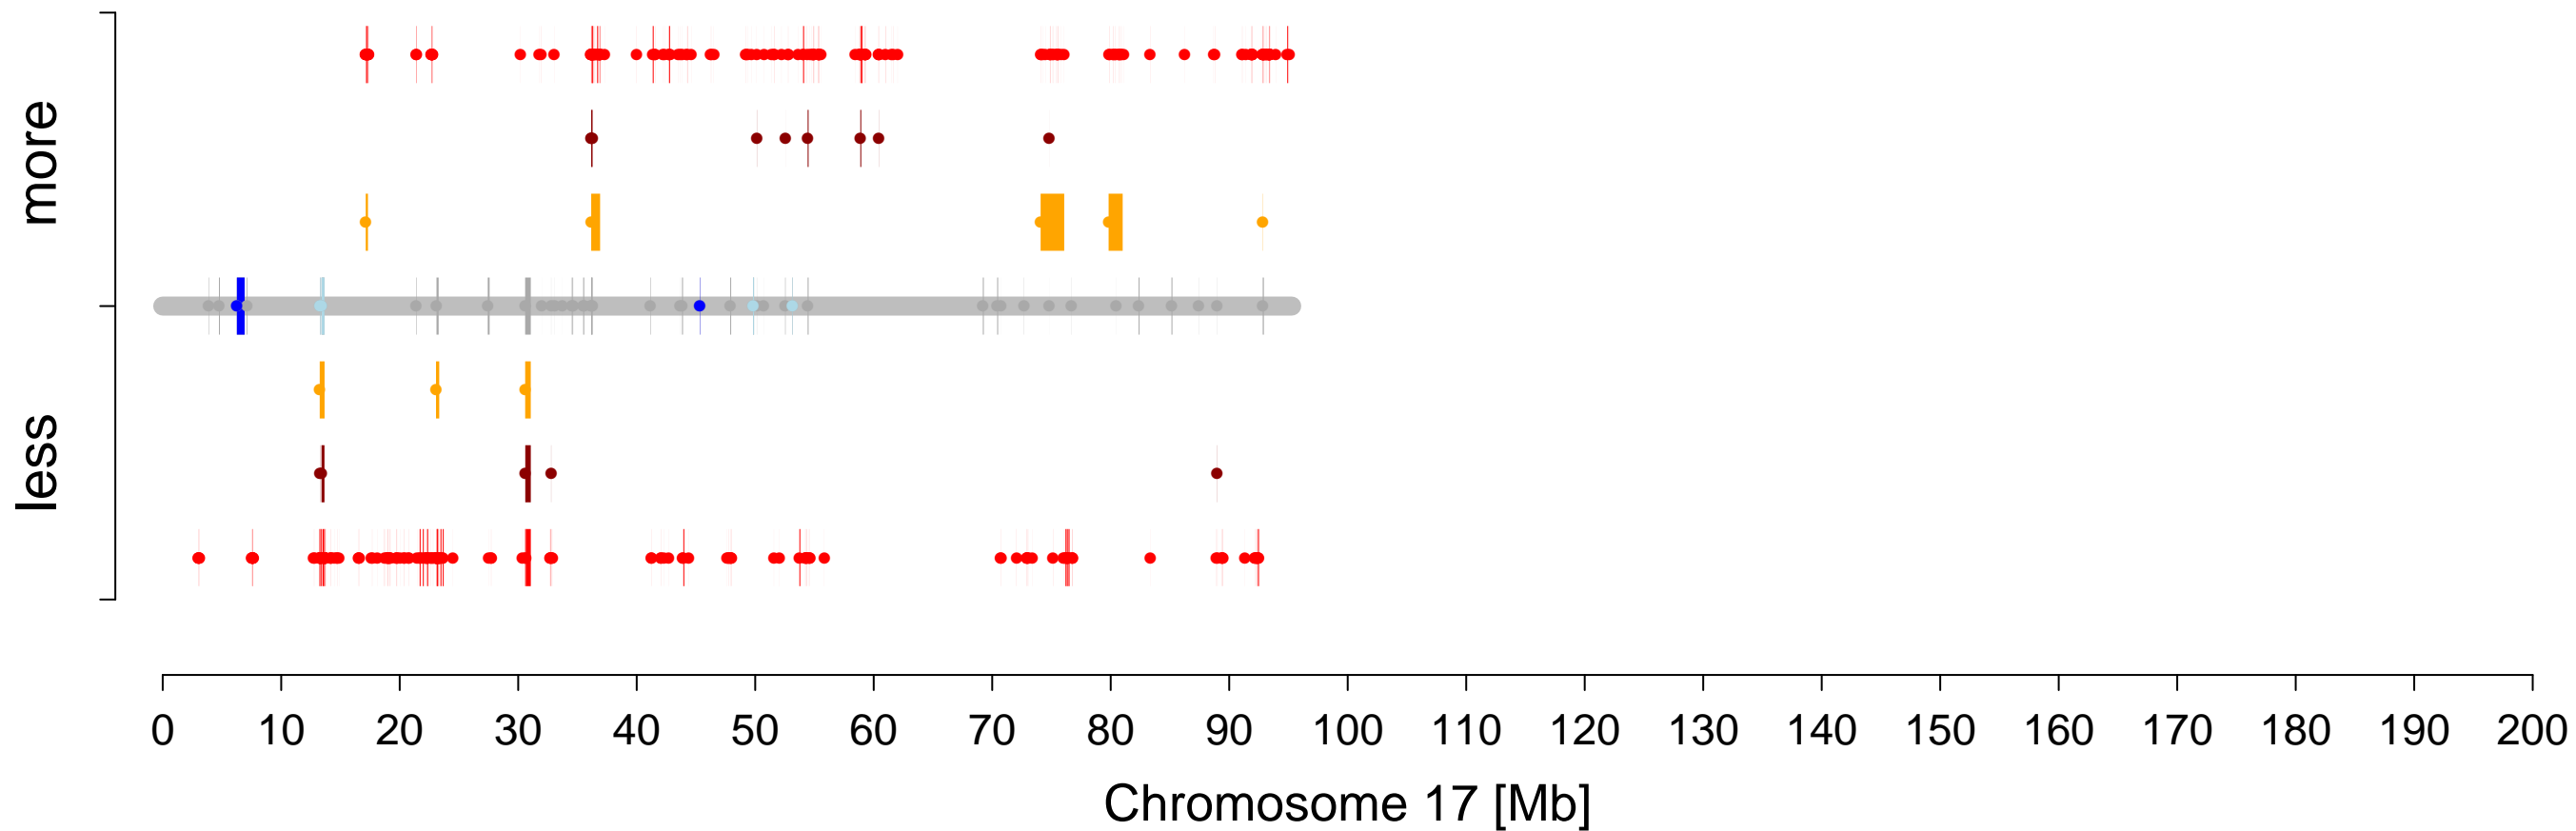

R)

Copies in HAB

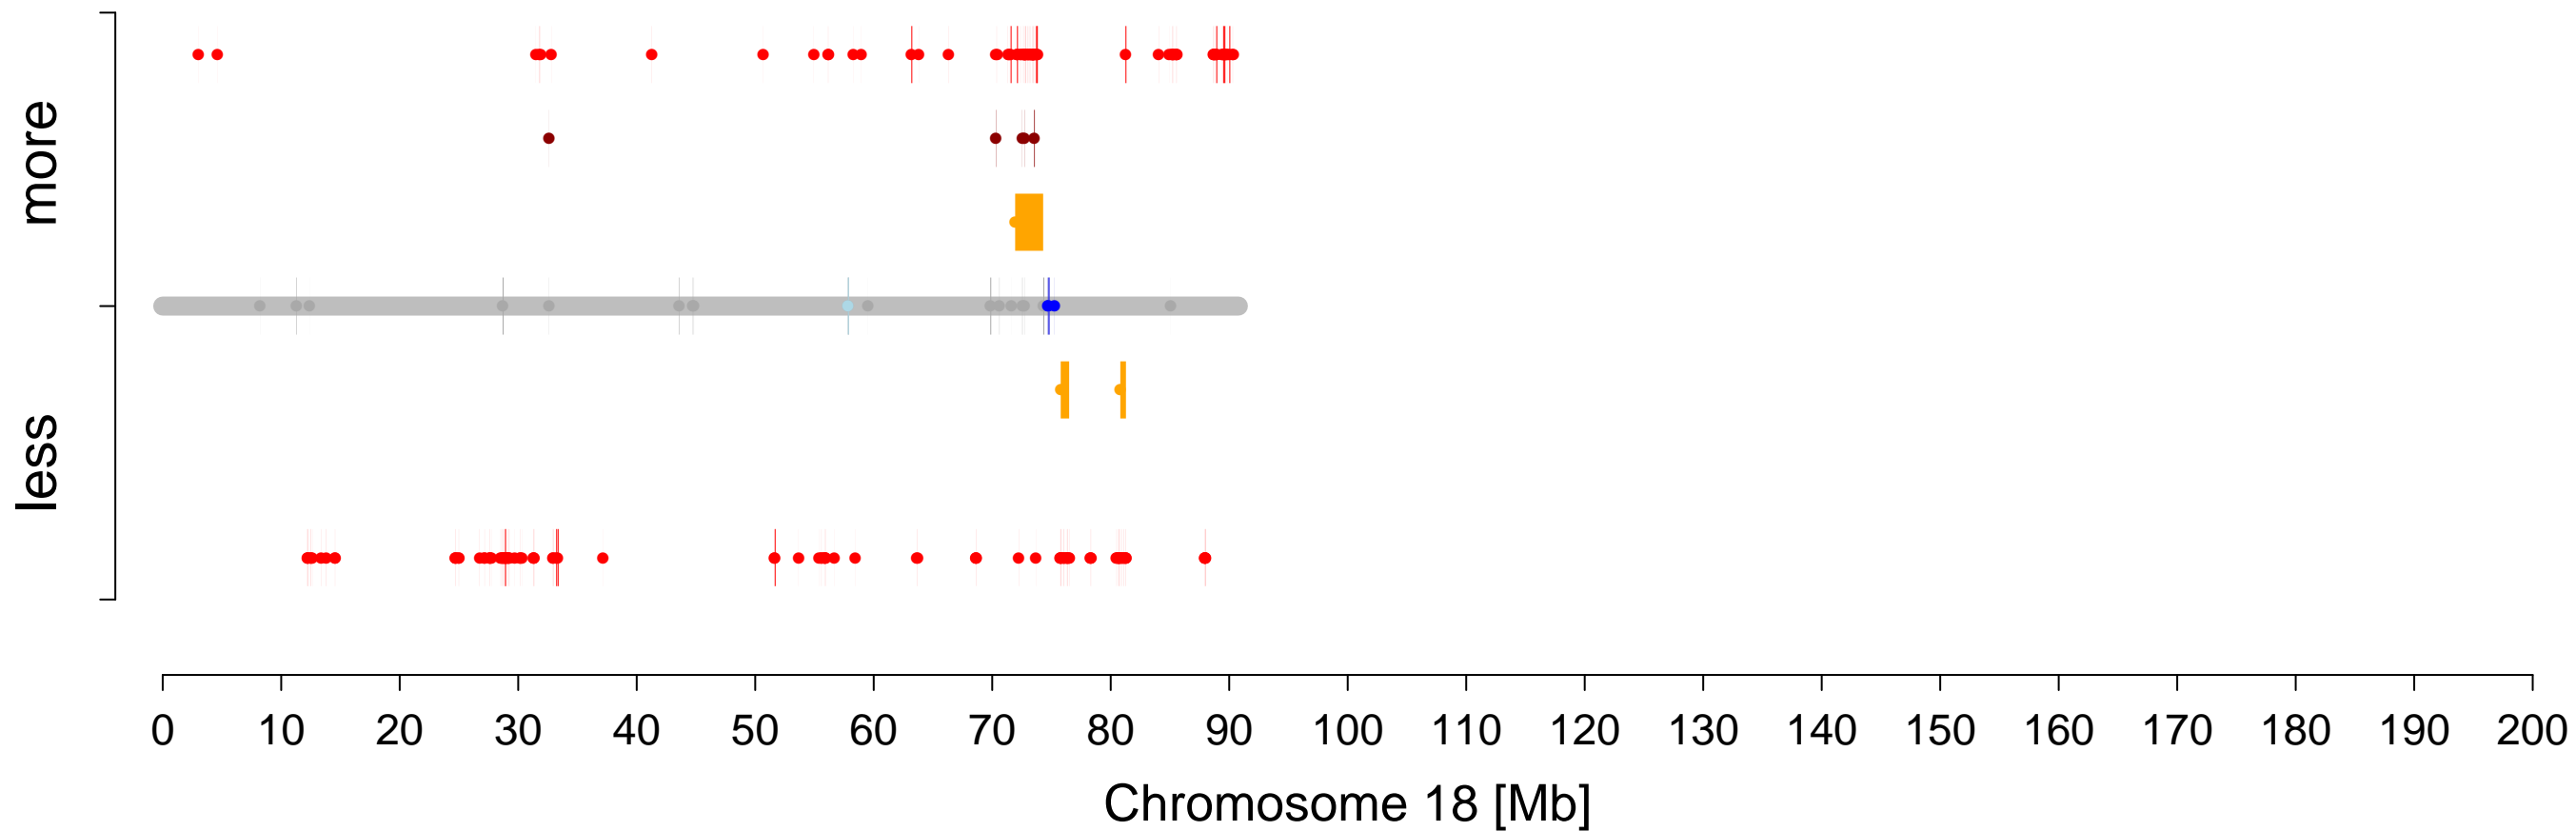

S)

Copies in HAB

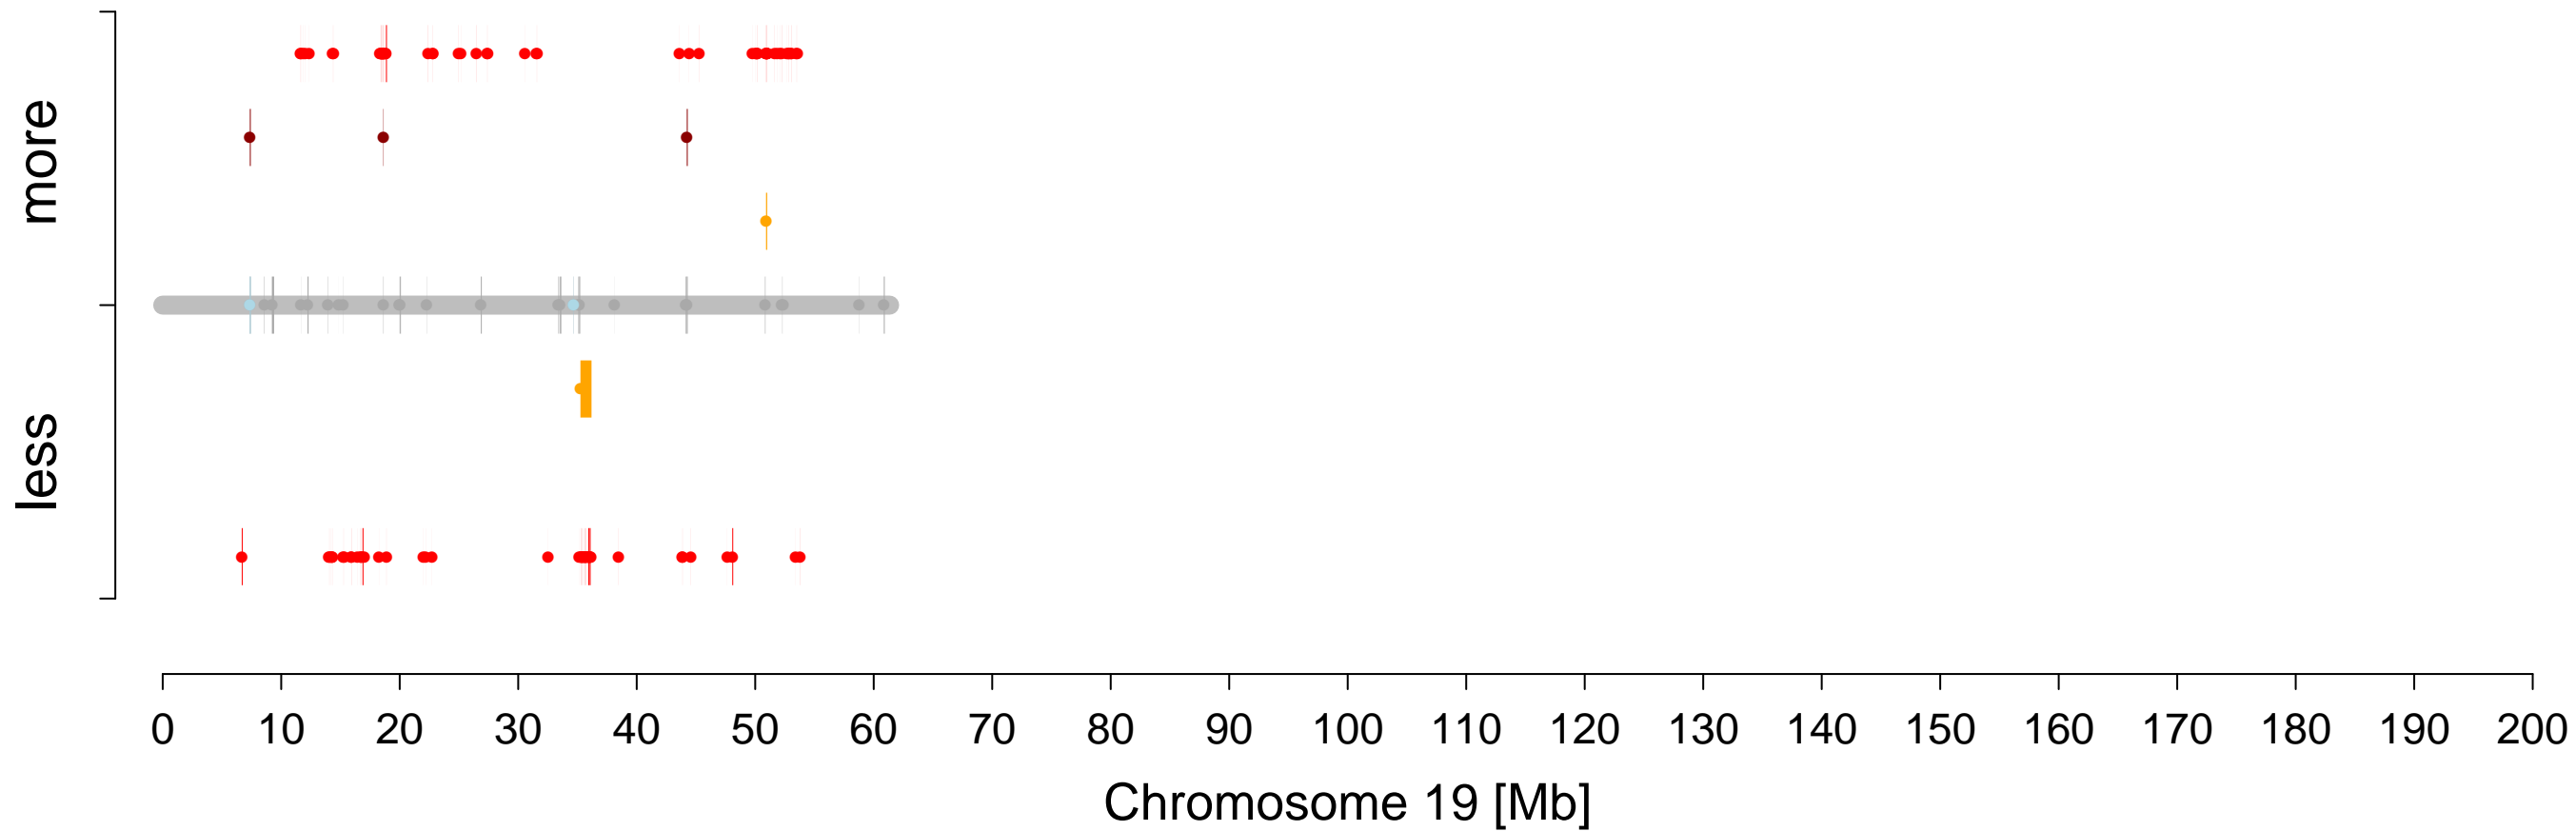

F)

Copies in HAB

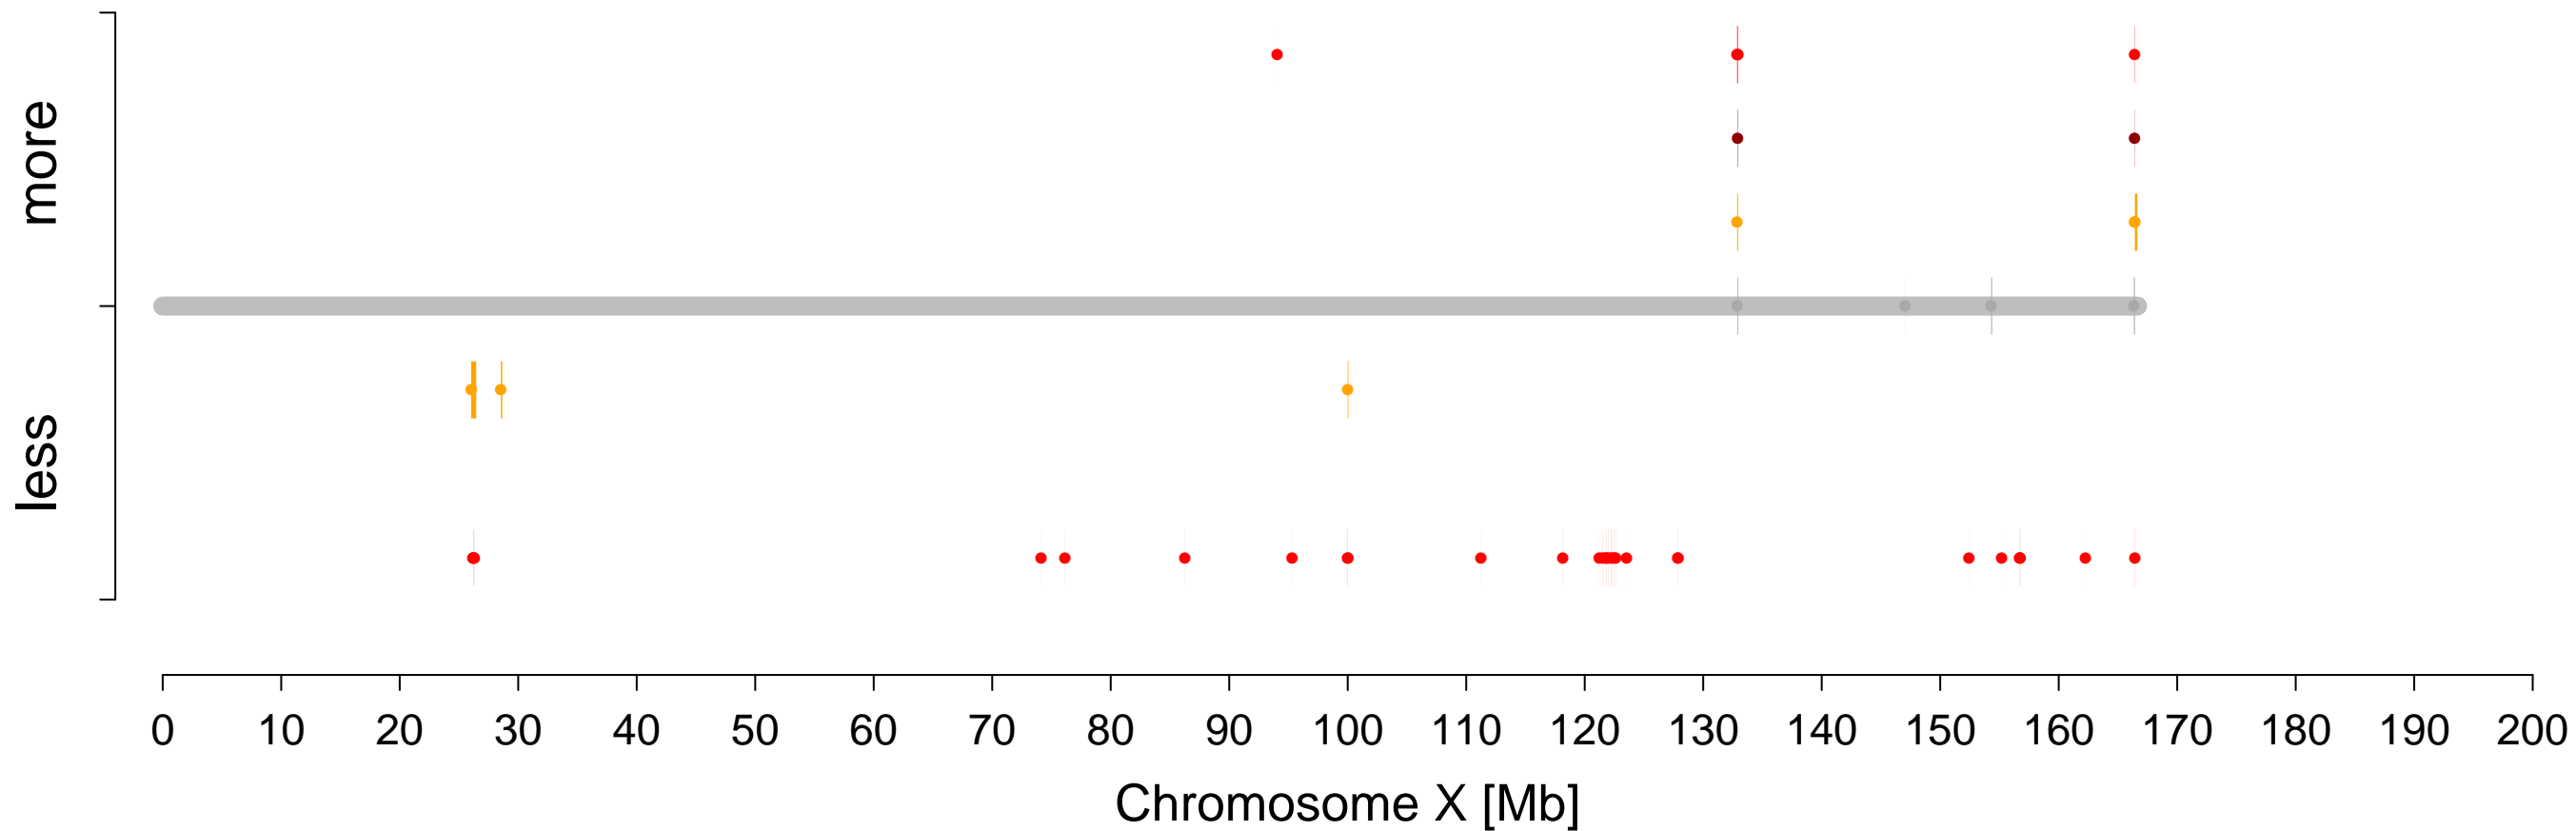

U)

Copies in HAB

more  
less

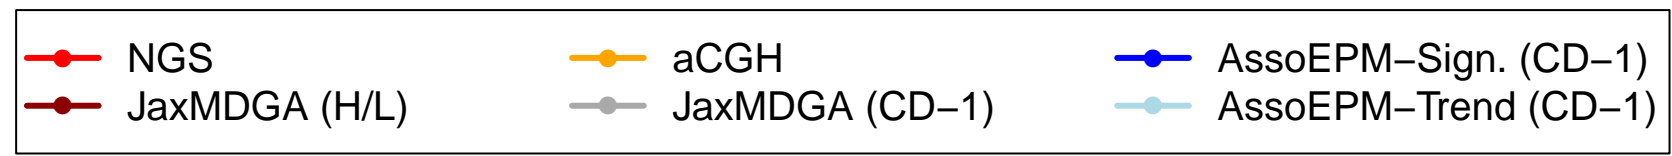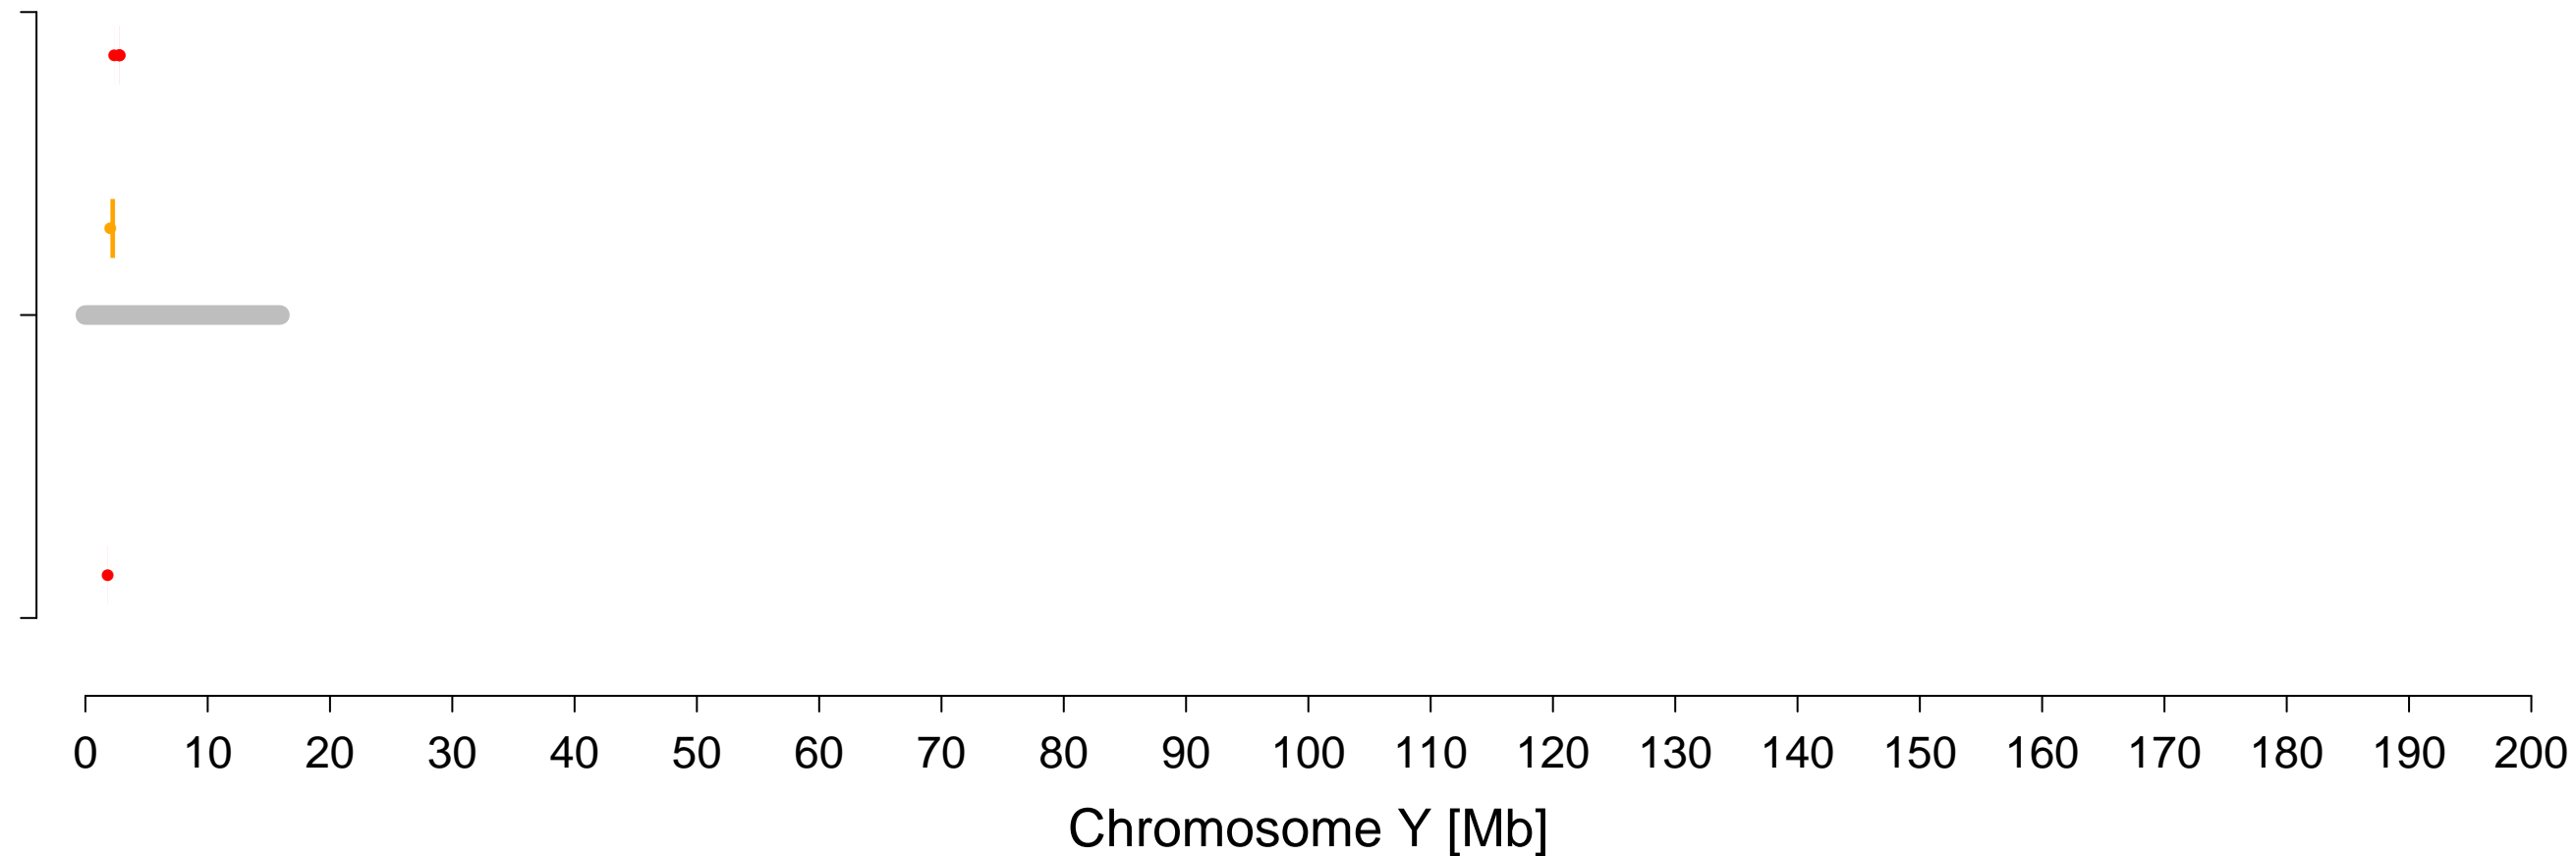

Supplement: pone.0128465.s006.pdf [file pone.0128465.s006.pdf]
