# Supplementary material for: Connecting Anxiety and Genomic Copy Number Variation: A Genome-Wide Analysis in CD-1 Mice
Source: PLoS One. 2015 May 26;10(5):e0128465. doi: 10.1371/journal.pone.0128465 (PMC4444327; doi:10.1371/journal.pone.0128465)
Supplement: S4 Table — (a) In the first line the percentage of time the animals spent on the open arm of the EPM is shown. Below the mean normalized intensities of all CNVs (position information in columns A-E) are shown for the respective animals. (b) Original data of performed behavioral tests of all 64 animals are shown, Those data after GRAMMAR transformation are provided in (c). (XLS) [file pone.0128465.s010.xls]

## Sheet: a)
				EPMpercTimeOA:	51.37	20.29	14.62	26.92	20.01	64.77	28.41	19.33	47.38	40.09	44.5	19.62	63.8	40.98	55.74	51.33	46.09	15.24	45.81	35.81	51.84	82.26	47.17	19.48	27.85	50.99	19.14	25.3	22.21	43.35	50.37	20.8	33.44	59.75	34.56	64.19	22.12	51.34	28.17	43.26	48.98	22.69	48.91	37.87	33.25
RegNo	Chr	Start	End	Size	MeanNormInt_Animal1	MeanNormInt_Animal2	MeanNormInt_Animal3	MeanNormInt_Animal4	MeanNormInt_Animal5	MeanNormInt_Animal6	MeanNormInt_Animal7	MeanNormInt_Animal8	MeanNormInt_Animal9	MeanNormInt_Animal10	MeanNormInt_Animal11	MeanNormInt_Animal12	MeanNormInt_Animal13	MeanNormInt_Animal14	MeanNormInt_Animal15	MeanNormInt_Animal16	MeanNormInt_Animal17	MeanNormInt_Animal18	MeanNormInt_Animal19	MeanNormInt_Animal20	MeanNormInt_Animal21	MeanNormInt_Animal22	MeanNormInt_Animal23	MeanNormInt_Animal24	MeanNormInt_Animal25	MeanNormInt_Animal26	MeanNormInt_Animal27	MeanNormInt_Animal28	MeanNormInt_Animal29	MeanNormInt_Animal30	MeanNormInt_Animal31	MeanNormInt_Animal32	MeanNormInt_Animal33	MeanNormInt_Animal34	MeanNormInt_Animal35	MeanNormInt_Animal36	MeanNormInt_Animal37	MeanNormInt_Animal38	MeanNormInt_Animal39	MeanNormInt_Animal40	MeanNormInt_Animal41	MeanNormInt_Animal42	MeanNormInt_Animal43	MeanNormInt_Animal44	MeanNormInt_Animal45
1	1	16147549	16166507	18958	9.28587	9.95809	9.39585	9.9754	9.94141	10.0319	10.0237	10.0693	9.96871	9.89737	10.416	9.11438	9.09293	9.17043	10.0164	9.21681	10.4226	9.0561	9.87792	10.3983	9.95223	9.307	10.017	9.16976	9.17119	9.95436	9.94195	9.29623	10.3847	9.96889	9.29442	10.4074	10.0415	10.0681	10.1215	10.4711	10.0188	9.39877	9.98326	9.36235	10.0048	9.97779	9.23873	10.5278	10.034
2	1	20549514	20552454	2940	8.63959	10.2377	9.62745	10.1368	9.72529	8.65386	8.62864	8.86111	9.68891	9.71117	8.70851	10.2201	9.80293	9.76887	9.69417	9.70536	8.57008	8.54802	8.60268	8.54044	9.71546	9.68727	9.72339	8.59567	9.84596	10.0859	8.62127	9.7433	8.67932	8.61907	9.63785	8.64519	8.63315	8.62485	8.62464	8.6876	9.76152	9.52121	9.79253	9.64395	8.80784	10.0006	9.75311	9.63713	9.5799
3	1	23385680	23385855	175	9.78404	10.3322	9.73735	10.3303	10.3861	10.3411	10.2678	10.0334	10.2427	9.83898	10.4752	10.4564	10.4546	10.3037	10.347	10.1946	10.3246	10.4107	10.4183	10.4119	10.381	10.323	10.3699	10.4008	9.79536	10.3727	9.92024	10.199	9.66586	10.3837	10.3616	10.442	10.4742	10.3097	10.2707	10.1929	10.0591	9.69164	10.4393	9.01247	10.3608	10.4425	9.77544	10.3481	10.1282
4	1	31776449	31799110	22661	9.61111	8.75129	9.37377	8.73397	8.60886	8.57975	8.73703	8.73014	8.56544	9.59971	8.65486	8.6163	8.64496	8.709	9.59584	9.65855	9.71795	8.80317	9.49947	9.65945	9.49299	9.60973	8.78406	8.73971	9.60836	8.74315	9.63456	9.73646	8.73202	9.7247	8.74672	8.77061	9.45283	9.68172	8.54246	9.52059	8.56054	9.36926	8.58531	9.54416	8.68679	8.69718	9.53836	8.59363	8.7524
5	1	35232073	35235862	3789	10.3838	10.3703	9.82929	10.4522	10.0627	10.27	9.91452	10.2426	10.2953	10.3773	10.2898	10.4946	10.4029	10.4611	10.4265	9.99672	9.215	10.4604	10.0362	10.1343	10.3591	10.3336	10.43	10.0866	10.356	10.3575	10.4024	10.3433	10.0212	10.3113	10.2255	9.97621	10.6181	10.2385	10.3871	9.94907	9.94788	10.2992	10.4872	9.92644	10.0748	10.4922	10.0043	10.3434	10.3399
6	1	36837694	36838290	596	10.927	10.3196	11.02	10.9967	11.0013	10.4438	10.4538	11.0009	10.9843	10.339	10.2682	10.0487	10.1465	10.1283	10.2437	10.9147	10.9509	10.0932	11.3113	10.9551	10.3929	10.1656	10.2079	10.2547	10.2186	10.169	10.0919	10.4645	10.8544	10.299	10.2807	10.9419	10.9246	10.3171	10.342	10.905	10.7837	11.2433	10.0619	11.2202	10.8187	10.3481	10.9268	10.4174	10.6353
7	1	39032035	39038959	6924	10.4537	10.5421	10.4879	10.4939	10.899	10.8543	10.4237	10.8031	9.88412	10.5054	10.4771	9.73271	10.4308	10.4271	10.4444	10.4728	10.4596	10.445	10.783	9.7543	10.4393	9.86243	10.464	10.4986	10.5154	9.77649	10.5073	10.452	9.80727	9.68386	10.3836	9.76591	10.6532	10.9483	10.6195	10.5678	10.5964	10.5752	9.80989	9.84111	10.5938	10.5698	10.6083	11.0358	10.6538
8	1	42233858	42246588	12730	10.2367	10.8963	10.9421	10.961	10.8783	10.9814	10.3222	10.4104	10.9179	9.46011	10.1856	10.227	10.2346	10.9452	9.46358	10.3986	10.4102	10.9242	11.0274	10.9343	9.56944	10.3275	10.9596	10.2226	10.3593	10.9596	10.8556	10.9849	10.3373	9.30346	10.9735	9.41114	10.4539	10.2816	11.0362	10.9216	10.4348	11.0667	10.778	10.2605	11.1358	9.409	10.9532	10.3173	10.3841
9	1	52348330	52357761	9431	9.899	9.70255	10.0924	9.92503	9.88554	9.9446	10.1195	10.1533	10.2007	9.99827	9.97045	9.85593	9.97139	9.97905	9.98235	9.95806	10.0651	9.37758	10.0194	9.91665	10.0464	10.0431	10.0269	9.82368	9.825	10.0695	9.76932	10.0381	10.0906	10.1018	10.1313	9.9894	9.99287	9.89689	9.91506	9.91692	9.35801	10.0634	9.97069	10.022	9.7927	9.32271	9.8425	9.40495	9.83072
10	1	55456409	55456847	438	8.92529	8.67125	9.73795	8.83528	8.87821	8.7294	8.87722	8.88554	8.802	9.70217	8.75962	9.87433	9.79201	8.80798	10.4073	9.65025	8.90737	9.68736	8.67393	8.75239	8.80387	8.75617	8.86785	9.7759	8.53324	8.79846	8.75572	8.76108	8.76274	9.80625	8.81825	8.81229	8.81317	9.8013	9.00214	8.9515	9.88944	8.98279	8.79756	9.80967	8.8182	9.81776	8.83086	10.4629	9.04256
11	1	55818726	55848831	30105	9.54951	9.50565	10.2743	9.56499	9.47094	9.94975	9.48985	9.5884	9.99727	9.93772	9.54392	10.0471	10.042	9.58656	10.5032	9.95976	9.62599	10.3937	9.58704	9.53014	9.53383	9.62691	10.0988	9.93952	9.49896	9.55636	9.61562	9.6254	10.0187	10.3393	9.52238	9.57947	10.0232	10.0359	9.67307	9.99381	10.1262	10.1116	9.63617	10.0277	9.71071	10.0309	9.99695	10.3813	9.60258
12	1	59336832	59337495	663	9.98667	9.50021	9.99182	8.67637	9.54682	8.73883	9.51809	9.51952	8.59174	9.92781	9.54045	10.1391	9.51315	8.60547	9.52715	9.99685	9.53151	10.0899	9.56704	10.0808	9.57418	9.57938	9.57831	9.98942	9.6175	9.55633	8.66932	9.93215	9.49982	8.57264	8.66197	9.42321	9.62585	10.2054	10.0624	9.48125	8.66287	9.5356	8.6366	9.95884	10.0305	10.1868	9.5086	9.61504	9.8758
13	1	71734705	71741575	6870	10.5868	10.2466	10.6203	10.6218	10.6388	10.6614	10.2861	10.3634	10.5693	10.2411	10.6872	10.6704	9.70493	10.3809	10.649	10.2215	10.5755	10.6186	10.5701	10.3662	10.2345	10.5342	10.6687	9.66598	10.2867	10.6662	10.2946	10.2204	10.3439	10.3121	10.2948	10.6181	10.7486	9.78393	10.6702	10.7092	10.7805	10.3881	10.3678	10.6463	9.95081	10.7695	10.6541	10.6165	10.2975
14	1	72198891	72210724	11833	10.0457	9.76782	10.0198	10.1187	10.1513	9.77344	9.75187	9.71439	9.70718	9.78196	10.117	10.1497	9.29584	9.77289	10.0334	9.8039	10.0501	10.1686	10.0894	9.84343	9.85262	10.0574	10.0483	9.83769	9.77517	10.0664	9.82038	9.71378	9.7472	9.7847	9.78605	10.118	10.0902	9.24605	10.085	9.77751	10.0334	9.73402	9.91267	10.1614	9.38411	10.1817	10.0917	10.1752	9.79614
15	1	77743451	77769548	26097	9.96132	10.4377	10.3801	9.96817	9.92757	9.98813	10.3336	10.4824	10.0886	10.3944	10.3502	9.90056	10.3487	10.0367	10.0307	10.0964	10.4292	9.92934	10.0412	10.3332	10.4205	10.3815	10.0253	10.3007	10.0514	9.98707	10.2771	10.4626	10.4159	10.3656	10.3738	9.81079	9.99379	10.3415	9.8164	9.929	9.53646	9.91015	10.3138	10.1702	9.85784	9.72381	10.3547	10.2244	10.4247
16	1	78229021	78245671	16650	10.7191	10.355	10.2464	10.1631	10.299	10.4089	10.7145	10.3565	10.3553	10.2863	10.3398	10.3703	10.1262	10.3436	10.1972	10.3453	10.7327	10.2183	10.3588	10.7965	10.1797	10.3556	10.3265	10.2016	10.1792	10.7259	10.2933	10.698	10.2904	10.2814	10.0995	10.2793	10.1796	10.2313	9.9127	9.95116	9.86542	10.1479	10.22	9.90061	9.71829	9.92491	10.7825	10.3253	10.5422
17	1	79034685	79074361	39676	9.31294	9.85139	9.85232	9.63735	9.19918	10.1293	9.33338	9.28132	9.8315	9.67963	9.725	9.30736	9.84855	9.2696	10.2033	9.75246	9.82516	10.1872	9.79561	9.36966	9.38037	9.70736	9.81395	9.67173	9.7076	9.35226	9.20514	9.32847	9.26274	9.75531	9.76914	9.87387	10.3254	9.23158	9.44126	10.1687	9.98911	9.71273	9.89113	9.33306	9.50675	9.36847	9.83045	9.86846	9.37437
18	1	95748149	95795140	46991	10.7154	10.7867	10.6879	10.7974	10.7731	10.7367	10.7348	10.8701	10.7331	10.7396	10.1308	10.7457	10.7634	10.7307	10.6128	10.0545	10.074	10.7573	11.0413	10.7309	10.0735	11.0056	10.0642	10.7611	10.6633	10.7551	10.1445	10.7623	10.0547	10.8116	10.7561	10.7615	10.6997	10.6806	10.0368	10.6147	10.6034	10.9167	10.7395	10.67	10.629	10.9591	10.0757	10.9659	10.9524
19	1	97254323	97293244	38921	9.48336	10.206	9.93723	9.55764	9.37786	10.0631	9.48523	9.90065	9.5591	10.0308	10.1466	10.1283	8.45299	9.44618	10.0666	9.94522	9.58413	10.0563	9.94368	10.1272	9.44065	9.99347	9.57956	10.038	9.93644	10.0941	10.013	9.37529	10.1317	10.0361	8.57287	10.1131	9.54165	10.054	10.2507	10.1302	10.2921	10.1576	10.2746	10.2213	9.78818	10.3316	9.55574	10.071	10.0662
20	1	97405881	97405894	13	10.4115	10.801	10.536	10.6594	10.8195	9.93911	10.5075	10.3549	10.511	10.7111	9.9863	10.8144	10.8105	10.583	10.695	10.5158	9.8325	10.8934	10.6683	10.8683	10.6097	10.6167	10.6272	9.69317	9.87575	9.88025	9.87121	10.6659	10.4977	10.0323	10.502	9.89491	10.8132	10.6922	10.7455	9.89404	10.0407	10.5614	10.7712	9.91145	11.1202	10.971	10.6848	10.5883	10.599
21	1	111646054	111711660	65606	9.89155	9.04798	9.03846	9.76561	9.735	8.97192	10.3119	9.84719	9.74901	8.86562	8.77977	8.7495	10.2808	10.3451	9.89697	9.90557	9.86743	9.67316	8.88912	8.87081	9.78096	9.85201	9.85258	9.72091	9.81314	8.95808	8.78009	9.82773	8.93047	8.78868	10.2633	8.87483	10.166	9.82422	10.3126	8.91859	9.77759	9.00905	9.74326	8.84512	8.82822	9.70408	9.79708	8.83874	9.74691
22	1	116260504	116348067	87563	10.0254	10.5424	10.3642	10.0688	10.0629	10.4086	10.062	9.95622	10.0201	10.0778	10.5447	10.6087	10.5256	10.0429	10.0279	10.4473	10.4771	10.0887	10.4125	10.0944	10.438	10.0313	10.4889	9.49181	9.52713	10.0491	10.0388	10.0449	10.4452	10.4955	10.4022	10.0322	9.7671	10.5205	10.5047	10.4232	10.0482	9.52747	10.124	10.0753	10.0676	10.1041	10.5781	9.55116	9.91023
23	1	117256807	117267404	10597	10.2334	10.914	10.8261	10.4052	10.3204	10.885	10.2266	10.175	10.3611	10.3455	11.0402	10.8631	10.8937	10.2489	10.324	10.747	10.9379	10.3766	10.8547	10.45	10.9606	10.3656	10.9361	10.3169	9.38037	10.4003	10.2978	10.2323	10.9676	10.9412	10.9395	10.2984	10.1946	10.8298	10.9066	10.7526	10.1858	9.49151	10.4759	10.4487	10.3647	10.4756	10.924	9.28047	10.1481
24	1	118847466	118897095	49629	10.4455	9.85796	10.4106	9.81338	9.85392	9.81246	10.4064	9.86303	9.77299	8.97165	10.5014	8.886	9.89269	9.84733	10.4633	9.09778	10.3903	9.86334	10.3927	9.83196	9.80492	10.4361	10.4426	9.78642	8.97068	9.85636	9.79989	9.82819	9.84363	9.82983	9.81016	9.83351	9.84265	10.4519	10.4992	9.85964	10.6684	8.94673	9.84338	9.929	9.98839	9.95286	10.4544	8.93437	10.3804
25	1	124786026	124822324	36298	10.1619	9.99914	10.1314	10.5967	10.6138	10.1894	10.5874	10.0932	10.5482	10.2493	10.2847	10.0151	10.6728	10.2359	9.98422	10.1814	10.1982	9.9698	9.87997	10.2301	10.1969	10.0243	10.009	10.1485	10.2035	9.93376	10.2232	9.99415	10.0329	10.6473	10.5838	10.1984	10.2705	10.2257	10.2245	10.2214	10.7721	9.97804	10.0378	10.0643	10.4027	10.3114	9.93495	10.6352	10.1438
26	1	125564862	125583245	18383	10.0698	10.7326	9.96888	9.43388	9.34964	9.96537	9.27242	9.89337	9.29078	10.0503	10.0827	10.651	9.39445	10.0929	10.5119	10.0844	9.97018	10.6842	10.4718	10.0139	10.0658	10.4815	10.5449	10.0542	10.0679	10.4554	10.0888	10.5408	10.5851	9.39239	9.3764	10.0269	10.0619	10.0181	9.97521	10.1343	9.62324	10.5653	10.6317	10.6433	10.2884	10.2924	10.6906	9.45726	9.87013
27	1	129051041	129076535	25494	10.4634	10.343	10.5117	10.3883	10.9024	10.501	10.8797	9.5838	10.942	10.4139	10.9488	9.05156	10.7974	10.9306	10.8946	10.3722	10.3854	9.00919	10.4111	9.2063	10.4554	9.31092	9.16222	10.9456	10.9594	10.9618	10.9187	10.3793	10.3428	10.9069	10.9628	10.9638	10.9856	10.8742	10.8548	10.2806	10.3735	10.4551	10.3528	10.4519	10.4331	9.33688	9.34183	9.29215	10.476
28	1	130723207	130733460	10253	10.2997	9.96161	9.98803	10.2431	9.88396	9.98788	10.286	10.4387	10.0255	9.8728	9.86838	10.269	9.82143	9.91036	10.0671	9.90205	10.2614	10.2037	9.91785	9.86879	10.2481	10.2652	10.238	9.93545	10.0084	9.9973	9.91349	10.276	9.90705	9.86782	9.91132	10.0074	9.66776	9.97389	9.70716	9.64982	9.27965	9.82682	9.85964	9.57307	9.33185	9.84162	10.388	9.79453	10.353
29	1	132430355	132474622	44267	10.2582	10.4993	10.2777	10.5117	10.2933	10.3001	10.2128	10.4748	10.4881	10.2239	10.5246	10.5757	10.2051	10.23	10.2173	10.2554	10.5416	10.528	10.2745	10.3063	10.502	10.5123	10.5146	10.5487	10.2408	10.2449	10.5344	10.4829	10.5196	10.2038	10.2076	9.79073	10.2363	10.4183	10.1593	10.0836	10.1903	10.1612	10.5958	10.3774	10.0407	10.422	10.5396	10.4308	10.4376
30	1	135250842	135255585	4743	10.7574	10.6985	10.3795	10.4091	9.76852	10.3357	10.3923	10.6601	10.7138	10.7648	10.4076	10.7535	9.64666	9.69414	10.3727	10.7167	9.67674	10.817	10.4352	10.3714	10.7195	10.3665	10.4393	10.3717	10.8068	10.3655	10.3947	10.4047	10.6645	10.404	9.73221	10.4142	10.4356	10.718	10.6886	10.3775	10.7195	10.3487	10.7366	10.3112	10.6347	10.3464	10.3167	9.77613	10.3227
31	1	141633508	141686866	53358	9.3536	9.32227	9.91974	9.36636	9.3312	9.41221	9.27364	9.33551	9.32156	9.30756	9.25769	9.33982	9.32374	9.32329	9.34013	9.37484	9.37792	9.29564	9.36964	9.30671	10.007	9.40346	9.32578	9.95485	9.94588	9.41557	9.91155	9.33834	9.33149	9.25962	9.33863	9.34786	9.16984	9.22048	9.18805	9.21401	9.22595	10.2397	9.32419	9.33695	9.31664	9.34835	9.21184	9.25047	9.36802
32	1	142515175	142625802	110627	10.2781	10.3526	10.0192	10.3358	10.3627	10.2929	10.315	10.3046	10.2856	10.3574	10.3815	10.3716	10.3928	10.3666	10.263	10.3304	10.2874	10.3616	10.3753	10.335	10.049	10.2812	10.3267	9.96712	9.95478	10.3165	9.99662	10.3692	10.3391	10.3581	10.2652	10.3123	10.2358	10.2774	10.2979	10.3013	10.4489	9.63217	10.3609	10.3892	10.4162	10.3914	10.3622	10.3388	10.2908
33	1	145624593	145649348	24755	10.2105	10.246	10.5558	10.6678	10.6546	10.125	10.8661	10.4246	10.1082	10.0867	10.7078	10.2708	10.2442	10.7174	10.618	10.1909	10.8311	10.7125	10.6341	10.6773	10.6011	10.1624	10.1849	10.1591	10.7419	10.1425	10.1806	10.8982	10.1764	10.1902	10.0967	10.1399	10.1648	10.9381	10.1989	10.5429	10.6328	10.5903	10.2567	10.2052	10.3327	10.6433	10.1914	10.6079	10.1093
34	1	150529441	150543605	14164	8.2142	8.30329	8.27443	8.17957	8.16601	8.20222	8.15196	8.29764	9.31224	9.32583	9.32962	8.1272	8.14584	9.13209	9.20968	8.3205	9.92517	9.35359	8.14096	9.28158	8.19669	8.27469	9.25116	9.21949	9.27356	8.18872	9.3161	8.24009	8.14043	8.11146	8.23389	9.28066	8.14208	8.15106	10.0326	8.32588	8.263	8.21004	8.145	8.32897	9.58327	8.25576	8.17707	9.27039	8.27688
35	1	150754214	150777417	23203	9.89482	9.77235	9.94442	9.86708	9.80739	9.90147	9.79363	9.90657	10.4229	10.3102	10.3782	9.90914	9.827	10.327	10.4837	9.91548	10.6814	10.4057	9.81979	10.3851	9.90969	9.91259	10.3984	10.4386	10.3248	9.9196	10.4022	9.8278	9.80114	9.78901	9.91021	10.4184	9.60064	9.88869	11.0766	9.89049	9.73985	9.8679	9.79667	9.82263	10.6292	9.9434	9.82783	10.5376	9.78522
36	1	150869357	151048926	179569	9.9574	9.97626	9.97932	10.0162	9.95678	9.96215	9.94262	9.92768	10.0736	10.0998	10.0907	9.93687	9.98082	10.1154	10.0793	9.96953	10.3142	10.0692	9.92964	10.0978	10.0837	9.97543	10.0962	10.0857	10.0793	9.9397	10.0903	9.98313	9.95882	9.92884	9.93701	10.112	9.86302	10.0553	10.472	9.94063	9.95327	9.93017	10.0057	9.98573	10.132	9.99528	9.9659	10.0685	9.90583
37	1	151114382	151189461	75079	10.096	10.0557	10.3974	10.4301	10.4553	10.1343	10.0822	10.1333	10.4619	10.4801	10.3423	9.96276	10.0043	10.4554	10.5028	10.0917	10.6645	10.4665	10.0379	10.5426	10.4693	10.0974	10.4709	10.3732	10.4155	10.4656	10.4307	10.1296	10.1116	10.4414	10.048	10.394	9.94768	10.3243	10.6017	10.031	10.0349	10.6619	10.0092	10.0731	10.3795	10.3947	10.3468	10.3485	10.6453
38	1	151948823	151949622	799	9.05103	9.06757	9.44479	9.41645	9.46684	9.06881	9.05931	9.10419	9.54328	9.54977	9.50109	9.01753	8.99468	9.55911	9.52317	9.10076	9.98503	9.88669	9.11983	9.93737	9.47205	9.09672	9.53893	9.51384	9.52837	9.48547	9.45173	9.17765	9.0614	9.45928	8.95108	9.46491	8.94789	9.65504	10.008	9.0024	8.99246	9.93817	9.00874	8.90845	9.54633	9.61719	9.56349	9.62561	9.87748
39	1	152327228	152327348	120	8.82376	8.58904	8.76555	8.55896	8.51959	8.68077	8.66942	8.77183	8.64038	10.2972	10.4522	8.52408	8.59518	10.5996	8.45816	8.84176	10.5582	10.5045	8.71506	10.5669	10.6675	8.77995	10.636	10.6776	10.7294	8.79946	10.4883	8.83837	8.49235	8.43598	8.6636	10.5213	8.51146	10.2297	11.2683	8.57016	8.58019	8.49786	8.53883	8.6584	10.4797	8.46581	8.57949	8.42938	8.7522
40	1	152551280	152551619	339	9.45767	9.37509	9.56848	9.49068	9.44401	9.46943	9.51056	9.63408	10.0458	10.178	10.1949	9.25576	9.35604	10.1796	9.97805	9.43094	10.5361	10.0672	9.36811	10.1944	10.2177	9.44495	10.0839	10.1479	10.1926	9.41317	10.1551	9.58008	9.44478	9.32077	9.4197	10.1542	9.34893	10.0525	10.578	9.41913	9.34885	9.42824	9.29208	9.39899	10.3079	9.42045	9.27877	10.0393	9.5938
41	1	155362668	155395168	32500	10.3717	10.5896	10.5859	10.622	10.6219	10.5901	10.3888	10.5746	10.3827	10.0745	10.6024	10.6408	10.3593	10.0395	10.3538	10.3917	10.0573	10.3759	10.6522	10.3782	10.3672	10.3734	10.4313	10.6438	10.6237	10.5738	10.6184	10.5998	10.3641	10.6178	10.3663	10.3558	10.0825	10.4076	9.82624	10.3942	10.285	10.508	10.6294	9.79533	9.76075	10.3497	10.6717	10.191	10.5265
42	1	159719419	160644184	924765	10.4443	10.5184	10.4838	10.4861	10.4403	10.4477	10.4983	10.4829	10.4372	10.5062	10.5198	10.5266	10.496	10.4806	10.4293	10.4431	10.4444	10.5132	10.5191	10.4755	10.4962	10.4827	10.468	10.5073	10.4912	10.4819	10.5076	10.4387	10.5092	10.4193	10.4784	10.4998	10.4279	10.5292	10.4941	10.4358	10.475	10.4867	10.5155	9.94805	10.4636	10.4784	10.5273	10.5006	10.4669
43	1	160802986	161749651	946665	10.4986	10.611	10.6177	10.5832	10.5381	10.5259	10.5314	10.5908	10.4883	10.6117	10.6118	10.4959	10.6161	10.4906	10.6126	10.6126	10.5379	10.6362	10.5943	10.4701	10.492	10.5503	10.5402	10.5378	10.564	10.6022	10.5382	10.5335	10.607	10.5352	10.6083	10.5972	10.4722	10.6198	10.614	10.5503	10.6354	10.6143	10.6132	10.0459	10.6089	10.6137	10.585	10.6166	10.6074
44	1	170514272	170514364	92	10.309	10.2576	10.4415	10.2064	9.63563	8.66963	10.3745	10.4588	10.4423	9.6404	10.3538	9.65392	10.3208	9.72962	10.3003	10.3599	9.75419	10.3571	10.4292	8.45475	10.4367	10.3437	9.64327	10.4209	10.3691	10.3123	10.3221	10.3394	9.67395	10.302	10.2739	9.65941	10.773	10.5002	10.5589	8.70476	10.1574	10.5009	10.3839	10.4111	10.0274	9.79815	10.4141	10.5156	10.3643
45	1	173168430	173168911	481	10.4863	10.4398	10.3824	10.4039	10.3723	10.4139	10.5306	10.3528	10.3911	10.4185	10.4874	10.4788	10.4943	10.489	10.5097	10.4316	10.4401	10.4769	10.443	10.4442	10.4591	10.4151	10.5338	10.4955	10.5876	10.4374	10.4907	10.4521	10.4228	10.4765	10.4794	10.4714	9.45766	10.4745	9.73709	9.82174	9.29177	10.2339	10.4991	9.80294	9.30875	9.74297	10.5285	9.97155	10.2435
46	1	173219128	173222721	3593	9.70999	9.31891	9.62989	9.23048	9.62314	9.33682	9.21197	9.3303	9.95773	9.23795	9.26791	9.29284	9.21717	9.62022	9.26395	9.31282	9.28218	9.27251	9.32138	9.71072	9.27747	9.32351	9.69429	9.26835	9.30731	9.67209	9.28423	9.29419	9.24755	9.62909	9.1732	9.69632	9.69969	9.34444	9.6977	9.68696	9.638	9.62626	9.28233	9.22702	9.20771	9.66408	9.38192	10.0979	9.6668
47	1	175732220	175912848	180628	10.5748	10.5392	10.6251	10.5747	10.4083	10.6298	10.4714	10.5463	10.6069	10.6648	10.5229	10.787	10.7663	10.7049	10.5359	10.6937	10.7056	10.5997	10.264	10.7536	10.6936	10.5603	10.6053	10.5153	10.726	10.677	10.5373	10.4874	10.6873	10.6927	10.4795	10.1098	10.665	10.5266	10.5341	10.7345	10.7834	10.4157	10.2998	10.3143	10.8038	10.5155	10.2441	10.722	10.0467
48	1	175929891	175942012	12121	9.93439	9.8802	9.60366	9.91779	9.64375	9.70414	9.94164	9.58421	9.65225	9.6428	10.0246	9.81527	9.8249	9.5085	9.96531	9.65622	9.76519	10.0822	10.5212	9.86888	9.65261	9.99884	9.96388	9.85742	9.67966	9.88919	9.91435	9.86375	9.71691	9.82639	9.84475	9.96579	9.77902	9.89193	10.0248	9.70446	9.83807	9.52246	10.8753	10.9694	9.89226	9.85418	10.7254	9.72852	9.94599
49	1	175956768	175956788	20	10.3841	10.4112	10.8059	10.3382	10.7891	10.8499	10.3228	10.7589	10.8073	10.9124	10.4072	11.0333	11.0579	11.0096	10.3101	10.8886	10.9791	10.402	9.11538	10.9737	10.8662	10.4722	10.4346	10.4467	10.9624	10.84	10.3413	10.4168	10.9848	10.8809	10.4097	10.4016	10.5448	10.2732	10.1211	10.6641	10.4874	10.7103	8.94872	9.11919	10.3646	10.6687	9.00295	10.652	10.1372
50	1	177725275	177729816	4541	9.80769	10.2886	9.69143	10.3376	9.71111	10.3203	9.83743	10.2515	9.78648	9.72191	10.3671	10.9791	10.5041	10.4092	10.8835	10.3139	10.3675	11.0024	10.8116	10.8455	10.2922	9.81767	10.4901	10.3645	10.8481	9.73497	9.70738	10.2374	9.8159	10.4057	9.78178	9.78412	11.0261	9.79358	10.4376	11.0261	10.5853	10.9274	9.79164	10.4618	9.67402	10.5448	11.0084	10.9729	9.7968
51	1	177998116	178000769	2653	9.73553	10.7686	10.8928	10.8861	10.4347	10.8252	10.8934	10.7919	10.4366	10.9285	10.9302	10.9194	10.8906	10.4234	10.9218	10.7606	10.8947	10.9052	10.8626	10.9088	10.7644	10.4534	10.83	10.8349	10.826	10.9487	10.9297	10.7898	10.8982	10.8895	10.9609	10.4258	11.1187	10.819	10.8195	10.8952	11.0946	10.9231	10.8482	10.9736	10.5185	10.382	10.7443	10.8554	10.7762
52	1	183060113	183072518	12405	10.4456	10.4007	10.9156	11.045	10.4381	10.4183	10.3981	10.3783	10.3953	10.4051	10.4456	10.5391	11.0973	10.4894	10.4809	10.465	11.0438	10.4873	10.4368	10.4486	10.9466	10.9755	10.5082	10.3994	10.4811	10.942	10.4401	10.3832	10.4391	10.4197	10.4105	10.4614	11.1078	11.025	10.5164	10.4548	10.5323	11.0184	11.1098	10.525	10.5252	10.5906	10.4667	10.4993	10.393
53	1	186078558	186110754	32196	10.4046	10.0977	9.96491	10.3039	10.0843	10.1773	10.0864	10.0771	10.3499	9.96897	9.66345	10.3366	10.0202	10.4015	10.3488	10.1733	10.1714	10.0109	10.0698	10.1221	10.3035	10.0028	10.3741	10.3926	10.0628	10.0996	10.0903	10.1482	10.1137	10.0368	10.3247	10.3385	10.1646	9.80939	10.2435	10.4828	10.0922	10.4295	10.3479	9.74049	9.86679	10.1869	10.112	10.2007	10.5323
54	1	191042126	191079146	37020	10.3417	10.3388	10.331	10.2749	10.1017	10.1293	10.6157	10.608	10.5177	10.2966	10.3765	10.3754	10.2713	10.5049	10.3532	10.3997	10.3223	10.098	10.3607	10.8514	10.1319	10.4072	10.8297	10.3572	10.4084	10.0422	10.3058	10.6373	10.32	10.8128	10.274	10.0299	10.8468	10.3751	10.3265	10.7231	10.5309	10.8185	10.0299	10.4102	10.0961	10.0588	10.5477	10.9005	10.7662
55	2	8079421	8097887	18466	9.21701	10.2363	10.312	10.9861	10.991	10.2313	10.2831	9.37207	9.31629	10.2568	10.913	10.3007	11.0376	11.091	10.4438	9.2503	11.061	10.0952	10.4162	11.0237	10.2342	10.9017	9.25138	11.0461	10.4031	9.16984	11.0012	9.36295	9.1681	10.3146	10.3435	10.3116	10.896	10.2816	10.2119	10.2683	11.0475	9.16632	10.2193	10.9862	10.2002	10.9474	8.96041	10.1348	9.17643
56	2	10026781	10026809	28	10.5648	10.5139	11.0374	9.37388	9.44666	9.52762	9.30077	9.57079	9.41045	10.551	10.4775	9.17058	9.09524	9.2532	10.5919	9.42664	9.38972	10.5728	9.31976	10.6024	10.5998	9.33254	9.22676	10.6245	9.13121	9.20696	9.13714	9.52693	9.39098	9.15413	9.37203	9.27448	10.5018	9.32703	10.4854	9.26489	9.23846	9.30006	10.4405	9.41229	9.34766	9.4111	9.27001	9.33418	9.68522
57	2	13664146	13664834	688	10.782	10.856	10.716	8.97223	8.93638	10.7045	10.0461	10.1177	10.5573	10.7051	10.1469	10.8101	10.1664	10.0435	10.1588	10.7113	8.8997	10.1402	10.2145	10.1307	10.6004	10.1923	8.88847	8.92313	10.2096	10.6363	10.234	9.09971	10.6292	10.0444	10.4652	10.7119	8.99994	8.98833	10.0621	10.5608	10.1981	10.5765	10.7579	10.2396	10.1149	10.2337	10.2288	10.1734	10.7424
58	2	14998525	15246657	248132	10.3283	10.3492	10.3097	10.0266	10.046	10.3594	10.0093	10.0499	10.3412	10.404	9.97657	10.3928	10.3853	9.99872	9.99304	10.0245	9.92203	9.98913	10.0489	10.3875	10.3553	10.369	9.90754	9.86328	10.3494	10.0059	9.97166	9.95282	10.0179	10.0159	10.0023	10.3715	9.84639	10.001	10.4007	10.3851	10.4297	10.3542	10.4029	10.0377	10.0915	10.0591	10.0056	9.99431	10.3722
59	2	15367870	15368633	763	10.911	10.9249	10.7891	10.3444	10.3534	10.841	10.3059	10.3165	10.8398	10.9785	10.4028	10.9022	10.9655	10.3756	10.2417	10.1602	9.04906	10.3744	10.307	11.0337	10.9188	10.8385	9.08539	9.11937	10.912	10.317	10.3058	9.20783	10.2617	10.3785	10.4169	10.9	9.13423	10.3282	10.8271	10.6966	10.4712	10.7694	10.9772	10.2128	9.86949	10.1369	10.255	10.2228	10.7652
60	2	19097545	19120990	23445	10.4839	10.4795	10.0067	10.8311	10.8537	10.0792	10.5395	10.928	10.5882	10.5489	10.9195	10.4722	10.4959	10.5509	10.5654	10.5183	10.9537	10.5027	10.5722	10.5407	10.0267	9.9696	10.879	10.8966	10.418	10.5944	10.5435	10.8825	10.5855	10.5838	10.5772	10.581	10.735	10.5188	10.3534	10.0184	9.77247	10.5146	10.354	10.4428	10.2473	10.8046	10.3741	10.757	10.0846
61	2	23575240	23694548	119308	10.1813	10.5728	10.4473	10.2502	10.2176	10.4903	10.1269	10.1909	10.1356	10.1979	10.12	10.4431	10.4453	10.1193	10.4721	10.1668	10.1276	9.75875	10.4409	10.143	9.85911	10.4946	9.83072	10.1528	10.5411	10.153	10.1221	9.86408	10.144	10.4465	10.1615	10.1319	10.0855	9.79738	10.5155	10.564	10.1467	10.501	10.5397	10.5397	10.2548	10.2233	10.1207	10.188	10.5032
62	2	24048126	24054617	6491	10.6384	11.1781	11.1444	10.58	10.5694	11.1146	10.6713	10.6523	9.43198	10.5058	10.5781	11.1811	11.2833	10.6605	11.136	10.5704	10.6044	9.17709	11.1282	10.5956	9.52741	11.2184	9.35379	9.38304	11.301	10.5745	10.6045	9.43319	10.6374	11.1602	10.5577	10.5674	10.3594	9.37935	10.9798	11.0266	10.3091	11.0734	11.0921	10.513	9.41513	10.4225	9.36097	10.4139	11.1135
63	2	24535423	24654597	119174	10.7395	10.9757	10.9924	11.0352	11.0331	10.6897	10.9178	11.1184	10.9258	10.9323	10.6516	11.1895	10.9709	10.9614	10.7361	10.8915	10.8998	10.6599	10.9369	10.959	11.1557	11.178	11.178	11.2195	10.9315	10.9534	11.2397	10.8906	10.6443	10.9279	10.9299	11.1978	10.79	10.6422	10.943	10.6366	10.9056	10.9988	10.635	10.6458	10.7084	10.7083	10.9206	10.6897	10.973
64	2	38974768	38976716	1948	9.31467	9.50706	9.46528	10.3932	10.3874	9.46027	9.45796	9.55967	9.51763	10.3828	10.8689	10.3743	9.5185	9.43404	10.1591	9.43475	9.34956	10.4119	9.5332	9.51577	10.7475	10.3529	9.39612	10.3966	9.51473	9.47172	9.50618	10.3739	9.5916	9.40703	9.54776	9.49898	9.32965	9.40539	9.38211	9.45686	9.36746	9.36267	9.50668	9.51209	9.48877	9.46019	9.41205	9.37142	10.2383
65	2	46736100	46736483	383	10.1477	10.8009	10.8454	10.9276	10.8775	10.6756	10.7639	9.89378	10.0087	8.96101	10.0237	10.8854	8.91194	10.6734	10.814	10.0362	10.0943	10.9762	10.1827	10.2655	10.7843	10.9014	10.7022	10.9142	10.8853	10.8171	11.0204	10.5343	10.7377	10.0873	10.8008	10.9567	10.8381	10.2331	9.97931	10.1024	10.0109	10.2591	11.029	10.2401	10.9235	10.2686	10.7644	10.0899	10.7057
66	2	49051169	49070497	19328	10.8732	10.7763	10.6589	10.3699	10.2988	10.6227	10.6836	9.66881	9.65076	10.7331	10.3373	10.2579	10.3744	10.2699	10.3096	10.1819	10.6584	10.7969	9.69472	10.3395	10.7645	10.3454	10.7474	10.681	10.7566	10.3191	10.3544	10.587	10.7996	9.7558	9.84143	10.2714	10.6025	10.2437	10.6444	10.1917	10.2664	10.2294	10.822	10.3266	10.7558	10.3007	10.751	10.6556	10.4876
67	2	51610260	51614420	4160	10.24	10.235	10.2544	8.67642	8.61874	10.1641	10.1925	9.72085	9.55802	9.56462	9.55507	9.58064	9.53129	10.3479	9.5688	10.3142	9.59898	10.3349	8.68276	8.63399	10.2016	8.73049	10.2492	9.62863	10.3283	9.46033	10.2837	10.2548	10.2149	8.5162	9.63623	9.54556	10.3224	9.66764	9.62951	9.59253	9.66451	8.60248	10.2434	9.45295	9.62863	9.47834	10.3696	8.73013	9.6113
68	2	55558622	55579024	20402	9.40103	10.0526	10.0492	10.4561	10.4622	10.3706	9.36816	10.3799	10.3651	10.4504	10.3689	10.4724	10.5064	10.0179	10.0203	10.4593	10.4721	9.33675	9.98572	10.4011	9.60986	10.4141	9.36727	10.4418	10.4089	10.3639	10.4327	10.4112	10.3961	9.96057	10.4221	9.98012	9.95042	10.3612	9.80529	10.3387	10.0589	10.3793	9.9667	10.3333	10.0979	10.2786	10.0355	10.2529	10.0138
69	2	62524035	62524468	433	10.1628	10.1001	10.0278	9.32612	9.28856	9.39	10.082	10.4814	9.24417	9.1985	9.10843	10.6751	10.1872	10.2314	10.1529	10.2301	9.2596	10.1113	9.21625	10.7144	9.34127	9.20262	10.1902	10.162	10.184	10.1544	10.1474	9.30324	10.6152	10.1243	9.17877	9.24993	9.1789	10.552	10.6173	10.2147	9.09319	9.18483	10.0328	10.6371	10.0516	10.1241	10.6656	9.28894	9.41418
70	2	63192560	63242247	49687	9.74582	9.8487	8.75559	10.4508	10.4748	8.69133	8.5371	9.80198	9.7679	9.78491	9.85557	8.48413	10.5575	8.61852	8.66241	9.81742	9.77901	8.48738	9.8004	10.597	9.8876	9.76404	8.62683	9.8376	8.57116	10.5265	8.6002	8.78555	8.57014	8.6082	9.82204	10.4958	8.42988	9.70586	8.51547	8.64005	9.82878	9.86103	9.89912	8.59929	8.53625	8.5251	8.48679	8.59812	8.72497
71	2	65188132	65192936	4804	9.4861	9.50923	9.30857	9.51433	9.46848	9.29502	9.41839	9.79407	9.32686	9.51779	9.44877	10.515	10.4154	9.38962	9.52486	9.43323	9.47419	9.50797	9.43771	10.3357	9.33732	9.35596	9.48768	9.40419	9.52692	10.1386	9.56671	9.38536	9.53774	9.43074	9.36094	10.2703	9.61713	9.55211	9.52396	9.46625	9.70162	9.43808	9.61253	9.67974	9.70445	9.67067	9.58177	9.56471	9.33504
72	2	67407575	67425236	17661	10.6468	9.60314	9.76084	9.70343	9.56622	9.69957	9.69556	9.69007	9.69969	9.55127	9.6056	9.62573	9.68512	9.66947	10.6091	9.66411	10.5927	9.59886	10.593	9.65736	9.71121	10.6163	9.6637	9.57192	9.65239	10.7222	10.617	9.67936	9.69276	9.7488	10.6568	9.67552	9.80869	9.62445	9.68824	9.60882	9.7908	10.4458	9.57803	9.76914	9.79597	9.73963	9.58433	9.57316	9.63821
73	2	71656510	71687549	31039	10.7918	10.6429	10.6871	10.3396	10.6784	10.5162	10.5376	10.6035	10.56	10.2869	10.8342	10.7231	10.228	10.2535	10.6126	10.2247	10.5859	10.8757	10.303	10.4138	10.5728	10.2261	10.823	10.6677	10.822	10.7891	10.2871	10.1648	10.2465	10.5977	10.2404	10.239	10.366	10.6252	10.6631	10.5774	10.6772	10.5726	10.746	10.614	10.3532	10.6688	10.6245	10.6487	10.5037
74	2	74336997	74349334	12337	10.2844	10.9477	10.9054	10.9723	11.037	10.8698	10.898	10.8319	10.3753	10.4313	10.9802	10.9279	11.0039	10.9742	10.8551	10.4543	10.8289	10.4365	10.9316	10.9766	10.8412	10.347	10.3261	10.9945	11.0286	10.9049	10.9764	10.4591	10.9257	10.9371	10.9314	10.9606	10.9604	10.7544	10.2385	10.835	10.8173	10.772	9.18384	10.7945	10.6554	10.3837	10.8509	9.19504	10.8096
75	2	77654621	77675641	21020	10.246	10.4416	10.5401	10.3504	10.3683	10.0782	10.5158	10.6031	10.5655	10.452	10.0847	9.84068	10.3364	10.4018	9.95251	10.0125	10.2407	9.80961	10.2425	9.76106	10.323	10.0664	9.9513	10.2294	9.97308	10.2963	10.3382	10.1508	10.3851	10.4405	10.4659	10.3348	9.86288	10.0527	10.408	10.0909	10.0315	10.501	9.94979	10.1342	10.066	9.93589	10.4208	10.0642	10.3209
76	2	77675871	77873766	197895	10.499	11.7567	10.4677	10.5554	10.5605	10.4749	10.51	10.436	11.5962	11.5886	11.742	10.5426	11.6376	11.7651	10.5002	11.1861	11.4456	11.76	10.4646	11.5746	11.8127	11.2144	11.293	11.6853	10.5286	11.1833	11.7113	11.2083	10.8949	11.7609	11.5422	11.2731	11.561	11.565	10.4436	11.6641	11.9548	11.9037	11.7065	11.6034	11.9112	11.7975	10.5027	10.5082	11.5653
77	2	83693539	83697762	4223	10.7605	9.66173	10.6098	10.7098	10.7192	10.263	10.6641	10.526	9.75755	10.2883	10.2867	10.776	9.66635	9.75698	10.3484	10.32	10.3243	9.74834	10.286	9.81815	9.74824	10.2318	10.344	9.67128	10.5587	9.70721	10.2743	9.73557	10.3448	9.64394	10.1839	10.3534	10.535	10.4089	10.8942	9.81767	9.87334	9.86218	9.81346	9.88089	9.87268	9.88054	10.797	10.8156	9.77514
78	2	85646753	85648776	2023	10.3667	9.19641	10.3912	10.4082	10.3523	10.3051	10.2604	10.2379	9.20491	9.79988	9.65392	10.3933	9.01276	9.06845	9.77953	9.86317	9.80404	9.01505	10.2327	9.07896	9.22106	9.82643	9.83137	9.09607	10.3766	9.78741	9.79899	9.94578	9.80661	9.01342	9.70226	9.76338	9.58968	9.70546	10.1735	9.73261	9.05398	9.13473	9.09703	9.1606	9.16551	9.2102	10.3331	10.2854	9.52123
79	2	85832974	85867734	34760	10.6701	9.81918	10.5733	10.6828	10.6576	10.5839	10.4998	10.4281	9.77452	10.216	10.2549	10.7371	9.82282	9.84253	10.2918	10.2689	10.2681	9.89909	10.6696	9.84995	9.8351	10.2529	10.2104	9.81824	10.7024	10.1868	10.3216	10.2196	10.2235	9.82606	10.2222	10.2723	10.1633	10.1923	10.7237	10.2174	9.83207	9.80825	9.82846	9.86058	9.88276	9.88816	10.6466	10.726	9.68669
80	2	86532638	86532761	123	10.6752	10.3665	10.7339	11.0148	10.923	10.5434	10.5477	10.2762	9.95224	10.7352	10.4251	10.8815	10.2518	10.1462	10.098	9.96083	10.0229	8.7156	10.8614	8.64521	10.1432	10.3309	10.1667	8.51638	10.8895	10.2194	11.0772	9.85008	10.1614	8.55569	10.8167	10.366	9.87607	10.1134	10.5271	9.96705	8.50633	8.46132	8.53034	8.59102	8.64993	8.71535	10.5419	10.703	8.6546
81	2	88639234	88671005	31771	9.97578	9.83176	10.0014	10.0642	10.0721	9.99963	9.99464	9.92345	9.79654	9.99827	9.86529	10.1319	9.89901	9.98125	9.82377	9.80766	10.0145	9.88514	10.1081	9.85431	9.76145	9.75058	9.87037	9.48642	10.084	9.73082	10.1191	9.79732	9.85492	9.49011	10.0576	9.79352	9.89085	9.94264	9.97481	9.78901	9.85998	9.43273	9.46447	9.45978	9.45185	9.80257	10.0692	10.0351	9.34692
82	2	89450021	89457958	7937	9.62028	10.0854	9.99285	9.69284	9.60236	9.57902	9.98076	9.57449	9.9393	9.98568	10.286	9.62021	10.1756	10.1338	10.0499	10.211	10.0303	10.3427	9.66765	10.3268	10.0504	10.0373	10.0605	10.309	9.68883	10.0344	9.61893	10.0459	10.225	10.2803	9.51977	10.2443	10.1293	10.3073	9.60073	9.99021	10.3882	10.2161	10.3289	10.283	10.216	10.3246	9.98715	9.56458	10.1611
83	2	89760829	89783357	22528	10.3823	10.448	10.3282	10.3865	10.3482	10.3185	10.2968	10.2186	10.3275	10.3226	10.3614	10.3721	10.4668	10.3157	10.3786	10.3788	10.3397	10.3435	10.3542	10.3393	10.4058	10.4036	10.4098	10.4088	10.3966	10.3866	10.3698	10.3856	10.4037	10.4207	10.284	10.3651	9.69688	10.3081	10.0069	10.0745	9.94091	10.2337	10.5356	10.1647	9.98849	10.1713	10.3069	10.0501	10.1239
84	2	89902828	89923597	20769	11.1007	10.7175	10.7784	10.7014	10.7205	10.814	10.7605	10.5203	10.6018	10.9084	10.9314	10.7717	10.7547	10.8773	10.6681	10.834	10.8884	10.8798	10.8374	10.9396	10.6709	10.6174	10.7441	10.789	10.7217	10.8158	10.7062	10.8145	10.9063	10.5972	10.5815	10.9388	9.95868	10.9887	10.1127	10.3317	9.96764	10.3203	10.7629	10.2659	9.78271	10.4421	10.8856	10.5503	10.4885
85	2	90107247	90107565	318	11.0427	10.3801	10.9371	11.0353	11.0351	10.9644	11.0013	10.9201	10.436	11.018	10.4434	11.1072	10.4145	11.0428	10.4179	10.4654	11.0011	10.2897	11.0718	10.3621	10.3815	10.3751	10.3618	9.28518	11.2207	10.2737	11.0884	10.4164	10.3352	9.27757	11.0909	10.4476	10.9535	11.0925	11.0457	10.3812	10.3147	9.60893	9.22988	9.45068	10.2945	10.3891	11.0369	10.9776	9.49248
86	2	90687682	90704935	17253	10.9436	10.5512	10.9006	10.497	10.5079	10.5127	10.4238	10.3893	10.4671	10.8727	10.5004	10.4766	10.5562	10.4381	10.5048	10.4266	10.4411	10.5254	10.4495	10.4953	10.5221	10.4644	10.5051	10.584	10.8944	10.4283	11.0148	10.4336	10.8614	10.5553	10.5253	10.5231	10.4597	10.5579	10.3525	10.4045	10.3094	10.9005	10.5899	11.1483	10.3932	10.4395	10.9618	10.4161	10.452
87	2	95223572	95293225	69653	10.6654	10.6178	10.2522	10.1843	10.1407	10.5877	10.2294	10.1581	10.2724	10.0936	10.607	10.2723	10.307	10.5878	10.169	10.2798	10.595	10.6735	10.1273	10.2964	10.5891	10.3236	10.3224	10.2187	10.2295	10.6277	10.2601	10.555	10.6283	10.6052	10.2291	10.5404	10.6199	10.6073	10.2527	10.6486	10.7843	10.611	10.5855	10.2915	10.386	10.682	10.169	10.1765	10.2438
88	2	95432355	95501943	69588	10.4166	10.6014	10.2259	9.87027	9.82109	10.6001	10.2285	10.0969	10.176	9.82972	10.3498	10.1382	10.1784	10.6491	9.86215	10.2169	10.3902	10.6264	9.81806	10.098	10.5916	10.1626	10.5659	9.96589	10.6129	10.5586	10.0714	10.6077	10.3348	10.5738	10.1678	10.5888	10.4165	10.3368	9.89838	10.586	10.5408	10.5597	10.5878	10.1498	10.1124	10.5648	10.0852	9.85137	10.066
89	2	95601049	95660090	59041	10.1924	10.4408	10.0117	10.0858	10.0633	10.3759	10.0662	9.89351	10.0404	10.0435	10.2658	10.0123	10.1143	10.4313	10.0384	10.0231	10.2723	10.451	10.0385	10.0292	10.4923	10.1137	10.2803	9.88359	10.4575	10.4662	9.99497	10.3742	10.4776	10.4659	10.046	10.4642	10.3594	10.1855	9.83382	10.4895	10.6674	10.3896	10.4351	10.1374	10.1916	10.4783	9.93236	9.84605	9.90807
90	2	97990327	98098900	108573	10.0937	10.5756	10.5147	10.2496	10.2056	10.8595	10.0513	10.1321	10.4205	10.1213	10.5326	10.5234	10.1729	10.1474	10.068	10.5281	10.0968	10.4594	10.1598	10.1939	10.5827	10.848	10.518	10.0794	10.5914	10.8295	10.0984	10.8397	10.06	10.4888	10.1165	10.5118	10.2686	10.062	10.4534	10.7786	10.4529	10.7922	10.8787	10.5055	10.2511	10.5382	10.4944	10.0716	10.2826
91	2	98502651	98504185	1534	11.4406	11.4143	11.0866	11.5056	11.4175	11.1315	11.152	11.0263	11.0627	11.2778	11.4179	11.4607	11.4366	11.4386	11.4066	11.2661	11.2665	11.3704	11.2256	11.4066	11.187	11.3516	11.3654	11.3154	11.4167	11.3998	11.4547	11.1945	11.311	11.3624	11.2557	11.365	11.5765	11.2635	11.3582	11.4078	11.6549	11.4327	11.6936	11.6658	11.789	11.7031	11.4141	11.5338	10.9922
92	2	99858667	99872693	14026	10.4103	9.96077	9.78687	9.25704	9.22041	10.3663	9.12534	9.31584	9.73399	9.18281	10.246	9.88394	9.07648	9.79108	9.18758	9.79537	9.72313	10.517	9.07299	9.92923	9.67353	10.2511	10.4375	9.03289	10.2159	10.3626	9.12234	10.3387	9.88037	10.3399	9.20137	9.79831	10.543	10.2854	9.90756	10.1419	10.6222	10.1582	10.4889	10.316	10.4266	10.6507	9.70102	10.0414	9.69813
93	2	100669661	100698052	28391	10.7298	10.2839	10.2102	9.78608	9.73932	10.7212	9.70612	9.76582	10.2885	9.64389	10.6078	10.2938	9.60527	10.2368	9.67668	10.3094	10.2167	10.8205	9.7014	10.2733	10.1964	10.6361	10.7808	9.66772	10.6443	10.7285	9.66519	10.7531	10.3068	10.8128	9.70111	10.2997	10.767	10.8495	10.2284	10.6797	10.7169	10.6136	10.7687	10.7378	10.3805	10.9354	10.1743	10.3333	10.2329
94	2	101400951	101406561	5610	10.1855	9.77536	9.77639	10.0967	10.2058	9.37798	9.71954	9.43924	9.7324	9.73177	10.2354	9.82559	9.21987	9.75082	9.78987	10.1587	9.72646	10.2485	10.1564	9.73405	9.73706	10.1468	10.1836	9.28801	9.76076	9.77513	9.82244	9.71517	9.73199	10.1594	9.73353	9.79323	9.84537	10.2862	9.8908	9.88457	10.439	10.3028	10.2969	9.83212	10.3877	10.2871	9.82663	10.2917	9.80322
95	2	104754730	104755713	983	10.7421	9.48819	10.616	9.45928	9.43104	10.7357	9.39945	10.3336	10.2205	9.4337	10.8129	10.3653	9.52353	10.3244	10.3051	10.3779	10.7928	10.7501	10.405	10.3058	10.2599	10.3294	10.3643	9.51532	10.8453	10.7232	10.2387	10.7196	10.8307	10.8125	9.33334	10.7366	10.897	10.8554	10.7615	10.8548	9.71591	10.2664	10.244	10.8365	10.9791	10.297	10.8086	10.6843	9.64746
96	2	107456118	107456210	92	10.355	9.76814	8.71712	9.66493	9.69892	8.6879	9.80232	9.90214	10.393	9.7466	8.46082	9.78226	8.47131	8.54712	9.73261	9.82796	8.70122	9.67936	9.89459	9.66575	8.59869	9.7912	9.88665	8.57627	9.83344	8.61231	9.71925	9.81711	8.55666	9.79429	9.76692	9.71115	8.46353	8.57968	8.50937	9.57543	9.33664	9.57439	10.0802	9.36234	9.57089	9.27975	8.57486	10.0001	8.62804
97	2	114646550	114812772	166222	10.494	10.3595	10.3831	10.8331	10.81	10.4037	10.5092	10.5189	10.9963	10.8292	10.4449	10.4903	10.3651	10.5468	10.4944	10.5333	10.5315	10.4735	10.7824	10.4955	10.3851	10.5337	10.5201	10.4864	10.3886	10.4476	10.4703	10.8428	10.4072	10.7899	10.3875	10.4913	10.5061	10.3499	10.513	10.4009	10.5292	10.5193	10.4788	10.4087	10.5138	10.5057	10.5127	10.4758	10.507
98	2	119435715	119443644	7929	10.4914	10.1738	10.066	10.4364	10.4568	10.036	10.1302	10.0265	10.3305	10.1267	10.0936	10.3492	10.2216	9.79819	9.82159	9.78642	9.88085	10.3162	10.4407	10.2954	10.4042	10.2109	10.2147	10.2766	9.63023	10.0152	10.2295	9.69379	10.0453	9.77837	10.1289	9.81535	10.6927	10.1541	10.5209	10.2333	10.2742	10.1665	10.5509	10.2915	10.5871	10.2589	10.2568	10.2455	10.0979
99	2	125053391	125067750	14359	10.1469	10.2669	10.3625	10.1424	10.1852	10.0285	10.4665	9.98305	9.34366	10.1746	10.2188	10.5781	10.2399	10.5613	10.5331	10.1055	10.1898	10.1903	10.1222	10.574	10.4263	10.0403	10.2018	10.531	9.4813	10.4327	10.1404	9.46582	10.2467	9.40864	10.4537	10.1901	10.1848	10.6246	10.5706	10.0873	10.1794	9.4473	10.2293	10.2207	10.5071	10.5973	10.602	10.1826	10.4025
100	2	128720236	128721154	918	10.602	10.6341	10.2833	10.6107	10.5936	10.297	10.3285	10.5874	10.2257	10.2348	10.2895	10.2197	10.5726	10.2515	10.625	10.6176	10.284	10.2926	10.2634	10.6522	10.5733	10.6261	10.6281	10.6754	10.6883	9.82252	10.6356	10.5897	10.1645	10.5891	10.2572	10.5612	10.5595	10.3684	10.5388	10.536	10.4509	10.6213	10.5778	10.1338	9.55306	10.1505	10.6598	10.2723	10.6085
101	2	131988279	131995341	7062	10.0323	9.94967	10.1151	9.98884	9.97255	9.25259	10.628	9.46078	9.27118	9.91921	8.93991	9.94693	10.5672	10.6661	10.0707	10.6586	10.6219	9.9156	9.18727	9.96457	10.5604	10.5745	10.0061	10.5958	10.6018	9.26569	10.5311	10.0731	9.2066	10.6236	10.5558	10.5669	10.0971	10.119	10.0201	10.2141	10.609	9.12151	10.5731	9.16513	9.94496	10.5146	10.527	10.5525	10.1792
102	2	141299494	141324822	25328	9.26724	9.13555	9.3279	9.8922	9.85466	9.26431	9.89804	10.2003	9.27536	9.77769	9.76328	9.84987	9.13881	9.23981	9.80505	10.3694	9.26731	9.06515	9.88566	10.2769	9.62454	9.89442	9.22886	9.63842	9.82645	9.23131	9.1831	9.33433	9.83713	9.8121	9.24337	9.79997	9.52434	9.5791	9.25616	9.28533	9.61635	9.26574	10.2364	9.29567	9.87078	10.3182	9.19185	9.85582	9.96835
103	2	142748719	142766622	17903	9.55667	10.0128	10.0637	10.0436	10.0522	10.0157	10.0536	9.97348	9.99723	9.82962	10.0174	9.53009	9.99133	10.1035	10.1213	10.0906	10.0755	9.48606	9.84685	10.0873	10.5433	10.0587	10.0701	10.6866	10.0249	10.0376	10.7027	10.4827	10.069	9.99333	9.42259	10.0882	10.0654	10.2241	10.1373	9.59534	10.2149	10.1463	10.1788	10.0993	9.97464	10.1019	10.1188	10.2282	10.5495
104	2	145449366	145461121	11755	10.2779	10.5756	10.3719	10.3863	10.3464	10.346	10.5599	10.3009	10.2929	10.5558	10.6042	10.2956	10.3318	10.3536	10.3533	10.6754	10.4506	10.298	10.5357	10.5038	10.4175	10.2988	10.3281	10.5174	10.574	10.3889	10.5063	10.5249	10.5762	10.3154	10.3134	10.3163	9.86939	10.2428	10.1013	10.1118	9.66439	10.3451	10.665	10.5675	10.3406	10.2905	10.3342	10.2457	10.3328
105	2	147347705	147361349	13644	11.2614	10.1501	10.6909	10.7377	10.7226	10.6894	10.1896	10.7104	10.6477	10.729	10.1168	11.1786	10.1572	10.7485	10.5772	10.6838	10.9639	11.2544	10.8131	10.7045	10.6845	10.8016	10.7891	10.1967	10.8107	10.1522	10.1581	10.8212	10.2137	10.8159	10.7273	10.7744	10.5341	10.0562	11.0442	10.6684	11.113	10.8591	11.1548	10.056	10.0188	10.0459	10.6098	10.5525	10.5663
106	2	147572128	147572911	783	10.5535	9.53471	10.1694	9.59061	9.51881	10.1505	10.2034	9.89834	10.1558	10.5574	9.56482	10.1934	10.1574	10.2089	10.2695	10.402	10.107	10.156	10.6108	10.1023	10.1646	10.2419	10.5262	9.54402	9.52681	9.55555	9.52309	9.89207	10.1624	10.2788	10.6902	10.3061	10.3702	10.2525	10.2423	10.2999	10.7963	10.3771	10.2508	10.6739	10.6771	9.89943	10.2165	10.1898	10.1968
107	2	148755144	148927143	171999	9.98072	10.2368	10.1796	10.2052	10.206	10.1766	10.1863	9.94272	9.95259	9.96247	10.2063	10.0398	10.2459	10.2425	10.1875	10.1953	10.3766	10.3148	9.97807	10.1859	10.1695	10.0155	10.2148	10.2191	10.2997	10.1624	10.2223	10.2279	10.2072	9.52948	10.0462	9.54294	10.0718	10.3577	9.97274	10.2128	10.221	10.2134	10.2573	10.3002	10.3747	10.2024	9.96138	9.91656	10.1238
108	2	149137132	149146946	9814	9.52616	10.5773	10.4342	10.2607	10.2742	10.0391	10.0832	9.75796	9.85003	9.82449	10.0504	9.4235	9.89262	10.5478	9.97731	9.92758	10.0523	10.0999	9.72391	10.4512	10.1038	9.60304	10.2206	10.6173	10.2066	9.9645	10.4919	10.5304	10.1194	8.72254	9.47722	8.83327	10.5568	10.1027	9.52642	9.98819	10.6625	10.5443	10.1393	9.98164	10.1896	10.3125	9.84837	9.88649	10.1409
109	2	150863347	151038740	175393	10.044	10.7637	10.7128	10.6664	10.6962	10.6835	10.3217	10.0771	10.4474	10.3211	10.4566	10.3709	10.6285	10.6457	10.4628	10.6442	10.4148	10.3589	10.4905	10.7046	10.0353	10.349	10.734	10.7853	10.5851	10.7187	10.8061	10.6192	10.541	9.92855	10.3083	10.0233	10.8112	10.5951	10.4065	10.6693	10.4688	10.6571	10.8219	10.7443	10.6167	10.4588	10.8227	10.0714	10.1389
110	2	152838130	152838140	10	8.59398	8.41536	9.72953	9.84666	9.85208	8.50864	8.30661	8.4588	8.43909	8.3707	9.85933	9.9523	9.87943	9.79921	8.36263	8.47651	8.5072	9.95351	8.52544	8.61609	10.2931	9.83087	8.50073	9.76908	10.3334	8.5307	10.3585	9.7232	9.77172	9.81638	8.32276	9.84705	8.40414	8.37439	9.75971	8.56307	10.0499	8.40947	8.50213	9.8464	8.61184	9.89727	10.2545	8.53443	9.63863
111	2	157151875	157154538	2663	10.4731	10.235	10.4113	10.5799	10.5897	10.5084	10.5333	10.3586	10.4969	10.5666	10.2318	10.5549	10.1333	10.4946	10.4214	10.4661	10.4336	10.5553	10.561	10.4955	9.23496	10.4032	10.5088	10.5611	10.6337	10.1228	10.6059	10.4264	10.5717	10.6238	10.0361	10.5758	10.8844	10.179	10.6033	10.5543	10.7607	10.4861	10.7104	10.6713	10.8382	10.2444	10.6331	10.6573	10.5452
112	2	158150954	158151984	1030	10.8021	10.5281	10.1309	10.2603	10.1938	10.7598	10.1497	10.1816	10.9497	10.7163	10.4731	10.9332	10.1561	10.1904	10.3165	10.3174	10.8438	10.2414	10.9063	10.2812	10.5169	10.7829	10.2426	10.2204	10.1801	10.1988	10.1924	10.1839	10.1888	10.1526	9.9797	10.7657	10.5265	10.3456	10.913	10.9531	11.0419	10.2925	10.2349	10.2494	11.3163	10.6201	10.3438	10.9246	10.796
113	2	158641258	158643203	1945	11.084	9.78428	9.82382	9.79356	9.94239	11.0485	9.73531	9.89407	11.6425	11.0914	11.0468	10.9418	9.58058	9.62231	9.64122	9.57443	11.0375	9.5439	11.0549	9.59738	11.1463	11.0889	9.46334	9.78242	9.71685	9.69771	9.69145	9.64367	9.71376	9.56599	9.72721	11.0304	9.54787	9.58053	10.894	11.043	10.836	9.61858	9.51941	9.67596	11.3735	9.72597	9.53413	10.971	11.0438
114	2	159276790	159289145	12355	10.6072	10.6307	10.6711	10.5999	10.5604	10.2915	10.3901	10.4664	10.5618	10.5937	10.2907	10.5809	10.7935	10.6701	10.3165	10.6883	10.7645	10.5739	10.288	10.5217	10.2969	10.1217	10.6412	10.7999	10.1236	10.7855	10.7611	10.7473	10.2903	10.2894	10.8134	10.6132	10.9338	10.957	10.5953	10.3284	10.8689	10.6321	10.724	9.62496	10.5045	10.5219	10.8728	10.2317	10.4283
115	2	159730233	159749061	18828	9.92474	10.5894	10.3215	10.4543	10.4975	9.83556	10.3562	9.65498	9.82743	9.88244	10.632	10.6071	10.604	10.4863	9.90332	10.4375	10.3885	10.5213	9.89106	9.9148	10.4144	9.92753	10.391	10.6164	9.93053	10.4199	10.611	10.44	9.93212	9.94453	10.4363	10.4018	10.5625	10.4448	9.87999	9.88619	10.2055	9.96883	10.6492	9.64494	10.6249	10.5068	10.4956	9.94904	9.53261
116	2	161562255	161562577	322	10.8709	10.9362	10.7086	10.365	10.502	10.9053	10.432	10.7456	10.5375	11.0793	11.1626	11.0237	10.3213	10.7811	10.7988	10.6958	10.7037	11.2037	10.807	11.0307	10.8857	10.8082	10.9038	10.3769	10.9009	10.9289	10.9572	10.7761	10.8401	10.9192	8.50709	10.5617	10.4472	10.8751	11.0259	10.9746	11.2643	10.9799	11.266	11.0573	11.321	11.2718	11.1637	10.618	10.7766
117	2	162539702	162582200	42498	10.2785	10.2998	10.3351	9.92858	9.85038	10.7359	10.3327	9.96539	10.2913	10.2399	10.3397	10.2823	9.8684	10.3678	9.92455	10.2801	10.3234	10.2004	10.7697	10.3114	10.2876	10.7536	10.3518	10.3239	10.2912	10.7779	9.86723	10.7158	10.7774	10.8155	10.288	10.814	10.3401	10.201	9.91966	10.6534	10.8464	10.2759	10.249	10.2217	10.7884	9.90693	9.97894	9.96542	10.2582
118	2	174886491	177803022	2916531	11.0967	11.3045	10.7544	11.1515	10.7715	10.7377	11.0771	11.139	11.0159	11.0538	11.1211	10.7138	11.0635	11.0769	10.7385	11.0599	10.7044	11.2904	10.7362	10.7618	11.0989	11.1097	11.2665	11.2857	11.1476	11.1184	11.3622	10.7157	11.0385	10.6877	11.0634	10.7404	11.2845	11.0503	11.256	10.709	10.7539	11.2717	11.1484	11.3405	11.2203	11.1922	10.7039	11.1275	11.011
119	2	181026765	181027369	604	10.5704	10.5597	10.361	10.5915	10.6213	10.5533	10.5685	10.5791	10.6064	10.51	10.6495	10.3645	10.4395	10.6494	10.6178	10.4819	10.3966	10.7135	10.5767	10.5518	10.5899	10.3853	10.5268	10.6978	10.5215	10.4139	10.4822	10.593	10.3396	10.3467	10.4528	10.4723	9.84347	10.4612	9.95622	10.1176	9.41434	10.4237	10.6925	9.98438	9.41338	9.96773	10.5383	10.4022	10.4395
120	3	7421882	7421985	103	9.91971	10.0634	10.5911	10.8216	10.9207	10.5932	10.0334	9.89933	10.7626	10.5848	10.121	10.0856	10.8147	9.95035	10.6703	9.92709	8.59351	10.051	10.0097	10.8178	10.772	10.0644	9.9513	10.8744	10.0926	10.0219	10.0119	8.70174	10.0806	10.7614	10.8284	10.6577	8.43288	9.90062	9.98071	9.81344	10.4188	8.48861	8.47268	10.9796	10.2933	11.0815	10.6993	9.95119	9.92786
121	3	8555413	8556638	1225	10.1454	10.1895	9.91402	9.88612	10.0406	10.061	10.1583	10.0781	9.81975	10.0324	9.99032	10.8449	9.83845	10.0995	9.9272	10.1674	10.7326	10.1108	10.1694	10.0591	9.84285	10.0403	10.1729	9.78021	9.81175	10.0174	10.0824	10.7207	10.6721	9.89017	9.9245	9.95266	10.9091	10.1585	10.131	10.2619	10.2723	10.7644	10.6429	9.8576	10.2427	9.8727	9.85541	10.1201	10.7246
122	3	10385565	10390978	5413	10.6578	10.5973	10.5899	9.92609	9.99352	10.5816	10.6528	10.1203	10.8865	10.64	10.9565	10.6945	10.8715	10.61	9.96648	10.5631	10.6669	10.6917	10.6156	10.6374	10.007	10.5738	9.92972	10.6739	9.99221	10.6209	10.9263	10.5619	9.91467	10.6452	10.9051	9.97634	9.91742	10.1077	10.0376	10.762	10.8354	10.8621	10.6467	10.4037	10.4766	9.88698	10.6416	10.5874	10.4641
123	3	15340258	15819607	479349	10.2282	9.87313	10.483	10.5611	10.2875	10.2611	10.2354	10.2058	10.4485	10.2373	10.235	10.3174	10.2233	10.5465	10.2076	10.205	9.86198	10.2241	10.5687	10.2899	10.2033	9.77616	10.206	10.2317	10.2916	10.2004	10.2427	10.191	10.5472	10.1717	10.4946	10.5607	10.2238	10.2176	10.1879	10.1575	10.3033	9.90188	10.3288	10.6097	10.6128	10.2806	10.5687	10.5797	10.4604
124	3	16902891	16932841	29950	10.2632	10.5291	10.4465	9.90963	10.4435	10.4923	10.4384	10.0326	10.5013	9.92322	9.33543	9.92191	9.93028	9.89657	10.2953	10.5244	10.4944	10.4667	10.4607	10.4076	10.4712	10.3195	9.93323	9.86154	9.87817	9.45279	9.88617	10.4443	9.51539	10.4253	9.95321	10.5241	9.77599	9.89889	9.99575	10.5426	10.5032	9.94758	10.0663	10.6243	9.99524	10.5034	10.4778	9.9539	9.92559
125	3	18744219	18777414	33195	10.0973	10.301	10.7345	9.46673	10.1566	10.7554	10.7686	10.6611	10.1353	10.2281	9.40076	10.1436	10.1574	10.1465	10.1232	10.757	10.7513	10.7857	10.785	10.8034	10.202	9.65613	9.56098	10.1423	10.1984	10.1215	9.4791	10.7114	10.1638	10.2633	10.2379	10.8069	10.1585	10.0521	9.32285	10.8318	10.9856	10.182	10.234	10.8939	10.2717	10.3967	10.7872	10.12	10.3079
126	3	19248566	19249465	899	10.218	10.0778	10.8976	9.33883	10.1753	10.814	10.8035	10.8305	10.0508	10.2273	9.21284	10.1142	10.046	10.084	10.1767	10.8078	10.8341	10.7987	10.8905	10.8654	10.172	9.37736	9.30086	10.1305	10.1551	10.1734	9.26353	10.7549	10.0393	10.0441	10.0875	10.8692	10.0287	10.2449	9.279	10.9721	10.7241	10.2156	10.1248	10.8468	10.1261	10.0763	10.8502	10.1656	10.8739
127	3	19908299	19908553	254	9.21229	8.24129	9.78005	8.14251	9.15566	9.73162	9.21801	9.59176	9.20713	9.15	8.16879	9.41434	9.34266	9.25981	9.2911	9.78753	9.87171	10.0324	9.2	9.88146	9.07967	8.2236	8.09733	9.4242	9.28898	9.11833	8.21325	9.93182	9.2475	9.31958	9.25574	8.14696	9.18705	9.30207	8.20188	9.96399	9.90452	9.31664	9.28651	9.26133	9.22909	8.26276	10.0201	9.36463	9.72572
128	3	24116353	24157241	40888	10.0162	10.0206	10.2895	10.5295	10.4844	10.3014	10.1803	10.0033	10.0457	10.235	10.4852	10.5169	10.5576	10.4159	10.4218	10.0781	10.0214	10.2337	10.0845	10.1677	10.3692	10.061	10.4661	10.3846	10.1624	10.449	10.506	10.3508	10.509	10.1839	10.3754	10.4558	10.3041	9.93397	10.5702	10.1188	10.882	10.471	9.93669	10.7753	10.4786	10.7743	10.1915	10.0078	9.82711
129	3	27091227	27091625	398	11.2408	10.2802	11.0969	11.1296	11.206	11.0824	10.9779	10.973	10.2273	10.3259	11.1692	11.2536	11.1279	11.0085	11.1981	11.0506	11.1189	10.5151	10.4649	11.21	11.2159	11.0624	11.0517	11.2683	11.1567	11.2461	11.3689	10.9748	11.0594	10.5249	11.1466	11.2034	11.2529	10.1787	11.1841	11.0746	11.2548	11.1435	10.3261	11.2167	10.7128	11.1994	11.1565	11.3146	10.8991
130	3	36939970	36945279	5309	10.5128	10.7382	9.62293	9.72956	9.79436	9.73015	9.7114	9.83116	9.73353	9.70431	9.72235	9.7453	9.68298	9.76281	9.71626	10.2341	10.2755	9.704	9.74016	9.7361	9.83039	10.1605	10.2454	9.71849	9.72211	9.70325	9.70064	9.75229	9.7662	9.63686	9.63872	9.69585	9.68391	9.62307	9.65961	10.2196	9.56219	9.69178	9.65559	9.71616	9.66099	9.70636	9.59242	9.64142	10.1517
131	3	38148460	38176970	28510	9.12265	9.03594	9.90868	9.91286	9.8344	9.84598	9.03904	9.79254	10.2968	10.3275	10.2247	10.2902	9.84335	10.2251	9.02709	9.88575	9.0495	9.89887	10.2349	9.83782	9.11918	9.87287	9.01406	10.2306	10.2483	9.76869	10.2715	10.302	10.2792	9.81715	9.85306	9.79161	10.2117	9.81778	10.1749	9.81417	9.71662	9.82042	9.8124	10.2654	10.1753	8.98151	10.2607	10.2098	9.86098
132	3	46180539	46182502	1963	8.28367	8.11969	9.80297	8.30256	8.18403	8.41042	9.81592	8.43793	8.27144	8.15184	9.84425	8.04848	8.058	8.14185	8.18161	8.20115	8.17614	7.99714	9.90442	9.75018	8.32188	8.33026	8.15173	8.15547	8.20959	8.31543	8.13056	8.30297	9.88395	8.11038	8.23565	9.81671	8.03269	9.8545	10.5793	8.20317	10.0633	8.17843	9.77941	9.93744	8.20816	9.84198	8.086	8.22645	8.6125
133	3	46586743	46615495	28752	10.2705	10.3624	9.90237	10.4678	10.3733	10.2352	9.87391	10.1364	10.2471	10.2843	9.9996	10.4703	10.5046	10.3207	10.3537	10.3079	10.3605	10.4662	10.012	9.8538	10.3355	10.3528	10.3451	10.4074	10.4691	10.2943	10.3565	10.3831	10.043	10.3946	10.3395	9.9175	10.1888	9.83583	9.67338	10.3259	9.93593	10.2577	9.95505	10.4693	10.3065	9.90845	10.3142	10.2842	10.0735
134	3	52324222	52329358	5136	9.40713	9.9398	10.0061	9.36172	9.90079	9.38693	9.36639	9.63021	9.44696	9.26159	9.28175	9.92406	9.15881	9.23474	9.20599	9.30034	9.12442	9.76805	9.3182	9.95899	9.31313	9.42088	9.80408	9.98142	9.13125	9.31831	9.27903	10.0324	9.28293	9.25132	9.30887	9.28513	9.24341	9.29395	9.50769	9.47652	9.25878	10.013	9.14888	9.97121	9.37873	9.27713	10.5337	9.51638	10.6546
135	3	73340026	73346338	6312	10.7153	10.2865	10.3285	10.6419	10.7063	10.6571	10.262	10.6859	10.2673	10.726	9.17418	10.3858	10.2738	10.3146	10.8229	10.7524	10.6795	10.8296	10.2308	10.2707	10.7299	10.6679	10.7348	10.3033	10.9025	10.28	9.22935	10.2496	10.8779	10.3058	9.18813	10.8117	10.9157	10.9164	10.83	10.8449	10.5982	9.45505	10.3516	10.4702	10.5492	10.9694	10.3437	10.9039	10.7071
136	3	73914056	74346968	432912	10.5086	10.2796	10.2413	10.5286	10.518	10.4643	10.2262	10.3849	10.2066	10.4594	9.95768	10.2608	10.2857	10.1998	10.5087	10.5177	10.5408	10.5541	10.2455	10.2622	10.5122	10.5073	10.4524	10.2257	10.512	10.2459	9.95363	10.2742	10.6094	10.2755	10.0143	10.5196	10.3471	10.5075	10.4583	10.5882	10.2476	9.99056	10.2409	10.3203	10.3559	10.5607	10.1984	10.4755	10.3909
137	3	75378209	75414973	36764	10.0146	10.1117	9.98418	10.4002	10.4335	10.0031	9.92068	10.1909	9.57061	10.0211	9.53635	10.0743	9.61591	10.06	10.2214	10.0293	9.96294	10.1046	9.92437	10.0311	10.1567	10.047	10.1985	10.1381	10.4398	9.91141	9.59731	9.94746	10.3469	10.0303	9.6496	10.2781	10.3268	10.3136	10.3511	9.60241	9.73346	9.61843	10.0672	10.0806	10.1743	10.4274	10.017	9.93689	10.011
138	3	75623409	75627481	4072	9.95252	9.92532	9.77939	10.5791	10.5584	9.81495	9.88065	10.2808	9.44604	9.90592	9.28156	9.86814	9.34005	9.94063	10.5284	9.90388	10.0302	9.86573	9.96704	9.85885	10.3214	9.83986	10.4684	9.90007	10.3283	9.9819	9.24965	9.82473	10.4183	9.8533	9.46433	10.5095	10.0112	10.2702	10.5006	9.35476	9.10607	9.30304	9.77937	9.81953	9.88126	10.3316	9.81237	9.68455	9.84988
139	3	75701773	75712088	10315	10.4096	10.3495	10.4051	10.4963	10.6482	10.3363	10.3304	10.4458	10.0568	10.3985	10.0279	10.4724	10.0863	10.3588	10.5622	10.454	10.4199	10.4495	10.4154	10.4297	10.6278	10.4176	10.6577	10.397	10.6973	10.3487	10.0172	10.4302	10.7121	10.4666	10.0443	10.6846	10.5261	10.6065	10.5334	10.0548	10.0668	10.0749	10.3428	10.4129	10.3459	10.5637	10.4435	10.3908	10.3599
140	3	75822052	75927523	105471	10.3994	10.1892	10.1837	10.5433	10.5444	10.3992	10.1846	10.4773	9.97389	10.3918	9.90366	10.1168	10.1509	10.1604	10.4847	10.3927	10.5328	10.3397	10.1435	10.1852	10.4792	10.4093	10.5429	10.183	10.5307	10.1491	9.86121	10.2101	10.5204	10.1695	9.94246	10.3951	10.3033	10.355	10.338	10.5221	9.91029	9.95941	10.1616	10.1383	10.1732	10.4162	10.1546	10.348	10.5337
141	3	76770745	76819643	48898	10.2401	9.67765	9.65461	10.3411	10.3327	10.2685	9.68727	10.2546	9.33174	10.3008	9.27454	9.69215	9.76139	9.68152	10.273	10.3374	10.2761	10.3846	9.85244	9.62698	10.3116	10.3153	10.3228	9.68334	10.2771	9.71923	9.30333	9.78868	10.4097	9.8468	9.36789	10.2767	9.88299	10.1301	10.0236	10.1144	9.27044	9.29736	9.66983	9.54211	9.49152	10.1535	9.54195	10.0741	10.0886
142	3	76953923	76971769	17846	10.437	9.82956	9.80855	10.5112	10.5748	10.4447	9.83765	10.4091	9.13292	10.5021	9.06173	9.77106	9.87746	9.83407	10.4095	10.3642	10.399	10.4477	9.86326	9.83255	10.4521	10.5041	10.4066	9.72684	10.5254	9.89981	9.0939	9.88771	10.4963	9.81807	9.0118	10.3956	10.3035	10.41	10.5005	10.5278	9.14268	9.2212	9.98872	9.99152	10.0712	10.4965	9.73983	10.3909	10.3544
143	3	77322331	77371012	48681	10.6709	10.2544	10.2183	10.7128	10.709	10.6327	10.2253	10.606	9.95994	10.653	9.95855	10.3127	10.3496	10.2117	10.7103	10.6697	10.6719	10.7097	10.2277	10.2581	10.7041	10.6704	10.699	10.2279	10.5699	10.2746	9.88392	10.2389	10.6946	10.2665	9.92962	10.6818	10.5912	10.6271	10.681	10.721	10.0022	10.0316	10.3025	10.3752	10.4883	10.7868	10.1645	10.6436	10.6092
144	3	77485805	77554692	68887	10.6219	10.1655	10.2034	10.5766	10.7146	10.6466	10.1671	10.5595	9.90101	10.6998	9.81217	10.137	10.2231	10.1077	10.678	10.6564	10.6635	10.7347	10.1316	10.1751	10.6044	10.7014	10.7234	10.13	10.6781	10.1202	9.89773	10.2144	10.7166	10.1334	9.90838	10.6134	10.5454	10.6974	10.6844	10.6267	9.98508	9.96852	10.1447	10.2218	10.1889	10.6424	10.1267	10.6624	10.6225
145	3	77660467	77714260	53793	10.4613	9.96693	10.0547	10.4016	10.4711	10.4903	10.0066	10.4791	9.36525	10.4629	9.07959	9.97983	10.0078	10.1077	10.4973	10.5724	10.5751	10.5017	9.97416	10.0176	10.356	10.4808	10.5187	9.95121	10.4703	9.95202	9.1444	10.0515	10.5288	10.0158	9.34051	10.2673	10.3348	10.525	10.4443	10.5081	9.06674	9.10208	9.91261	10.0069	9.91773	10.4901	10.0037	10.4484	10.4495
146	3	79517672	79541183	23511	10.6509	10.4388	10.6475	10.3948	10.6153	10.6013	10.3342	10.3509	10.3357	10.5872	10.3579	10.5886	10.6388	10.4708	10.5846	10.5689	10.5521	10.6013	10.2329	10.3226	10.5382	10.624	10.6416	10.3625	10.7031	10.2779	10.5099	10.5598	10.6159	10.3064	10.2942	10.6254	10.0937	10.6034	10.2163	10.3013	10.0488	10.5384	10.3401	10.0382	9.79757	10.252	10.6432	10.3533	10.4835
147	3	79891997	79907423	15426	11.2809	10.8125	11.2208	10.7665	11.252	11.2197	10.79	10.7563	10.7711	11.2213	10.8132	11.3657	11.3991	9.77205	11.2617	11.2939	11.2754	11.3228	10.7912	10.7527	11.1674	11.2627	11.2647	10.6947	11.2689	10.7359	9.71736	11.2388	11.4155	10.8629	10.6943	11.2621	11.3936	11.3677	11.4159	11.3326	11.5322	11.2639	10.7595	11.0046	11.0159	11.4062	11.3609	11.3066	11.318
148	3	80082499	80104957	22458	10.7399	10.31	10.7421	10.2758	10.6683	10.6589	10.3441	10.3111	10.284	10.701	10.2726	10.8918	10.7959	9.6138	10.7885	10.7742	10.8081	10.7859	10.3064	10.2635	10.7614	10.7282	10.7752	10.3321	10.7697	10.2712	9.66406	10.7235	10.7555	10.3532	10.4272	10.7004	10.6744	10.8147	10.8056	10.7548	10.8005	10.7556	10.299	10.397	10.2896	10.7379	10.7842	10.7028	10.6593
149	3	80664095	80665695	1600	9.85285	9.49755	9.76303	9.81109	9.79353	9.71805	9.55221	9.33982	9.27895	9.83491	9.66586	10.2237	9.89663	9.03924	10.0585	9.68836	9.68388	9.85559	9.42039	9.67199	9.68179	9.84155	9.87155	9.45271	9.90645	9.36318	9.06457	9.85027	9.68816	9.38765	9.56921	9.84844	9.98536	9.87599	9.81724	9.75082	9.95368	9.63879	9.48517	9.47326	9.76401	9.9943	9.76625	9.74933	9.60955
150	3	81739495	81746183	6688	10.4315	10.3831	9.96171	10.3368	10.3923	10.3425	10.3982	10.3036	10.015	10.4065	10.4933	10.608	10.5605	10.4615	10.4909	10.3857	10.3856	10.5533	10.4105	10.4226	10.3952	10.328	10.5139	10.3955	10.4431	10.2641	10.4467	9.96415	10.4332	10.0905	10.3707	10.5302	10.6005	10.5445	10.5198	10.4878	10.1809	9.37791	10.471	10.1108	10.4902	10.1961	10.1479	10.1088	10.0195
151	3	82811832	82812650	818	10.6096	10.5439	10.4151	10.5404	10.4954	10.4084	10.5553	10.5402	10.5169	10.4153	10.4843	10.5439	10.5678	10.5535	10.349	10.6286	10.585	10.5616	10.5302	10.3797	10.5457	10.4339	10.4762	10.4949	10.4272	10.52	10.4973	10.3133	10.5298	10.3617	10.4739	10.3228	10.4236	10.4304	10.1253	10.5815	10.1038	10.2673	10.2244	10.2036	10.1675	10.2481	10.2617	10.2166	10.486
152	3	90910494	91030404	119910	9.21345	9.8851	10.3153	9.86092	9.82511	9.20781	9.87262	9.34712	9.86269	9.87726	9.80757	9.79605	9.00598	9.06306	9.82852	10.4397	10.3595	8.94351	9.15617	9.84499	10.3756	9.86626	9.09409	9.02903	9.8409	9.19903	9.08791	10.3461	9.90442	9.81297	9.17619	9.07714	8.89041	9.80592	9.10669	9.83786	10.2106	9.86534	9.74994	9.14711	9.05949	9.11916	9.81424	9.10544	9.91612
153	3	91831940	91835321	3381	9.36245	10.0962	10.3997	10.1121	10.1092	9.46228	10.0412	9.51919	10.0987	10.0919	10.0971	10.1206	9.31266	9.36457	10.1046	10.3915	10.4984	9.24207	9.30921	10.0368	10.5195	10.1229	9.32	9.33641	10.0692	9.3959	9.29896	10.3446	10.0991	10.0503	9.37641	9.42879	9.27195	10.0952	9.41654	10.0694	10.3615	10.1678	10.1167	9.47698	9.48397	9.4837	10.0872	9.34796	10.1221
154	3	92782636	92787763	5127	9.48766	8.12285	8.17627	9.66015	8.03438	8.04997	7.99871	9.79582	9.68886	9.67847	7.92094	9.43945	9.67621	9.70684	8.05547	9.71169	10.5214	7.98608	8.065	10.4563	8.12068	9.74342	10.1142	7.95108	10.4713	8.13657	8.04963	10.4674	9.71131	8.07743	9.80091	8.06928	7.81419	7.87929	7.87135	7.96432	9.4066	9.58702	9.69762	9.57058	7.95112	9.4483	9.66112	7.95297	9.51963
155	3	93569096	94040272	471176	10.6766	10.3329	10.3484	10.7123	10.3308	10.3408	10.2935	10.336	10.6093	10.6284	10.2755	10.6164	10.6253	10.2611	10.316	10.6314	10.6131	10.3155	10.3616	10.6369	10.3472	10.7139	10.8861	10.2748	10.9338	10.3442	10.3297	10.8497	10.6362	10.272	10.6478	10.3289	10.1919	10.2376	10.2447	10.2944	10.5766	10.6488	10.35	10.3577	10.2774	10.7225	10.2847	10.3053	10.6687
156	3	102697496	102739985	42489	10.9059	10.6079	10.0156	10.888	10.869	10.5123	10.8271	10.6473	10.743	10.5463	10.6009	10.0051	10.6412	10.9226	10.8764	10.5352	10.0011	10.9808	10.5437	10.628	10.8156	10.049	10.6305	10.9184	10.0254	9.99284	10.0307	10.8248	9.99988	9.99058	10.5271	10.0118	10.4588	10.5442	9.99216	10.5342	9.99335	10.8649	10.9719	10.6497	10.0494	10.0229	10.6112	10.8617	10.387
157	3	103421855	103422775	920	10.6003	10.1177	10.1062	10.166	10.0879	10.1317	9.64079	10.221	9.66601	9.57652	10.1022	9.56736	9.47794	10.0382	10.1214	9.6912	10.15	10.6105	10.2242	9.56849	10.0929	10.0847	10.1631	10.0443	9.5975	10.6042	10.5581	10.1741	9.60817	10.4095	9.98619	10.153	10.627	9.65068	10.6885	10.0847	10.1775	10.6367	9.97627	10.1492	10.6169	10.2148	10.611	10.6773	9.77893
158	3	105009284	105009297	13	9.34293	10.9843	9.55523	9.27114	9.2586	10.9769	11.0536	9.24684	11.5369	10.9563	10.9985	11.5583	11.0206	9.21398	11.5083	10.9255	9.08087	11.4261	10.8469	9.26031	11.0204	9.37928	10.9667	10.815	9.26137	10.978	11.0252	9.26549	11.0951	9.16556	10.9907	11.66	10.8106	10.7147	11.123	11.437	11.3959	9.45975	10.8721	9.5008	10.731	11.3221	10.6854	10.9664	10.7215
159	3	110734020	110807739	73719	10.6086	10.1982	10.6165	10.7366	10.2544	10.6148	10.594	10.2314	10.6149	10.6538	10.6871	10.7648	10.7656	10.7076	10.721	10.6878	10.2959	10.2366	10.2624	10.2463	10.725	10.6159	10.6237	10.641	10.6503	10.2508	10.6729	10.6438	10.7498	10.719	10.775	10.2037	10.5769	10.6938	10.7838	10.8294	10.8999	10.6232	10.6404	10.9295	10.9588	10.8623	9.9876	10.2582	10.2107
160	3	111559680	111562943	3263	9.36136	10.1369	9.91857	9.98526	10.0255	9.98166	9.30358	9.7911	9.31622	8.05308	9.99419	9.4744	9.48021	10.0669	9.93364	10.0011	10.0483	10.1657	9.34813	10.0456	10.0241	9.36339	9.35145	10.0295	9.9989	10.1066	10.0469	9.33171	10.0588	9.4119	9.19517	9.89838	10.1417	9.3098	10.0041	10.198	9.60452	9.14962	10.1908	10.2225	10.3913	9.49821	10.0529	10.0287	9.23466
161	3	112470201	112489449	19248	9.84654	10.0592	9.87909	9.88635	9.7922	10.1123	9.71136	9.77141	9.76819	9.86696	10.1099	9.70549	9.77113	10.0753	10.082	10.0524	10.0655	10.1523	9.75191	10.112	9.81191	9.88373	9.70816	10.1001	9.80383	9.73288	10.1038	9.81078	10.0768	9.7572	9.78186	9.83371	9.7928	9.8137	9.92326	10.0538	9.9518	9.88089	10.16	10.1881	10.4133	9.84599	10.0806	9.72502	9.64453
162	3	114246547	114456005	209458	10.068	10.3971	10.2472	10.0993	10.4223	10.3035	10.3469	9.979	10.029	10.0896	10.3662	10.123	10.1063	10.3629	10.3647	10.365	10.3713	10.4363	10.0697	10.4026	10.074	10.054	10.3752	10.3383	10.0967	10.0415	10.3657	10.2704	10.3965	10.0718	10.0308	10.3717	9.92911	10.2801	10.287	10.2338	10.1413	9.97493	10.4259	10.4496	10.5392	10.1196	10.3187	10.0125	9.94672
163	3	116043731	116044155	424	10.2844	10.1984	8.65568	10.7521	10.0648	10.7891	10.1955	9.94608	8.65827	10.2183	10.0348	8.57438	10.2765	10.7503	10.3281	9.99513	8.53691	10.5055	10.4492	11.0214	10.0839	10.8712	11.0051	10.5805	8.83704	10.7826	10.1668	8.63948	10.1964	10.4344	9.91028	10.4688	10.1939	10.2691	8.63998	11.1264	10.2861	10.2897	11.2583	10.9467	10.9873	10.4413	10.2557	10.4505	9.95837
164	3	116517329	116519296	1967	10.4627	10.5394	9.71148	10.9	10.3835	10.8067	10.3823	10.3294	9.60443	10.4315	10.3089	9.57894	10.4166	10.8868	10.3847	10.5715	9.65586	10.354	10.4653	10.825	10.4053	10.8428	10.877	10.7743	9.69156	10.8954	10.3549	9.68932	10.4326	10.3902	10.2984	10.3361	10.0796	10.4031	9.50874	10.864	10.2338	10.2603	10.9158	10.8402	10.5704	10.2993	10.4746	10.3022	10.4083
165	3	116765381	116765393	12	10.2045	10.3344	9.2149	10.744	10.2752	10.7314	10.276	10.0597	10.1937	10.4744	10.2698	9.9997	10.6068	10.9267	10.2721	10.8316	10.1787	10.0773	10.478	10.7691	10.1283	10.7106	10.689	10.7536	8.91954	10.677	10.1612	9.68705	10.1883	10.524	10.5037	10.2414	10.4629	10.542	9.17465	10.5781	10.5926	10.5587	10.893	10.6276	10.5475	10.4809	10.3097	10.1336	10.3086
166	3	121705472	121715079	9607	10.8894	10.907	10.777	11.136	10.8423	11.0634	11.1078	10.72	10.8241	11.1234	10.914	10.4225	10.9982	11.1797	11.1947	11.155	11.162	11.2348	10.8733	10.3716	10.8425	10.8598	10.925	11.1802	10.9061	11.1201	10.3432	10.8408	11.1547	10.4217	11.1182	11.1595	11.1201	10.3351	10.7909	11.0824	10.8958	11.0963	10.8963	11.0822	10.5028	10.4453	10.8972	10.3722	10.9423
167	3	122728997	122729137	140	10.0312	10.1161	10.2941	10.181	10.2614	10.1588	10.216	11.4496	11.5656	12.0509	9.9933	11.5529	11.633	10.1105	10.0142	11.5741	11.591	9.92254	10.1406	11.5152	10.0353	11.5362	9.98559	10.0472	10.0806	10.1566	10.0417	11.5538	10.1869	11.6044	11.6265	11.5359	11.4941	11.4116	10.123	11.467	11.4762	11.5122	11.5001	10.1498	11.3124	11.9067	10.0189	10.1522	11.3627
168	3	133030667	133030900	233	11.054	11.1635	10.812	11.1621	11.0034	10.8856	11.073	10.7535	10.9509	11.1679	11.1753	11.0638	11.2058	11.0324	11.0499	10.9772	10.9951	10.818	11.0063	11.043	10.983	11.0381	11.0713	11.0552	11.0896	10.93	11.0376	11.1208	11.1821	11.2043	11.0969	11.0753	9.70117	10.6254	9.65503	9.94231	9.5525	10.2706	11.1157	9.94257	9.60079	9.75829	11.1612	9.90674	10.2598
169	3	135520542	135537289	16747	9.77319	9.73909	9.90647	9.7207	9.68073	9.89788	9.95431	9.85826	9.94269	9.68944	9.93771	9.74767	9.99132	9.96493	9.701	9.6933	9.79118	9.98198	9.75247	9.94534	9.69896	9.75668	10.3845	9.97146	9.70057	9.68987	9.78053	9.68472	9.71611	10.0478	9.68201	9.95581	9.75962	9.79681	10.0225	10.0002	9.85244	9.7759	9.99948	9.82087	9.81459	10.0368	9.8025	9.78801	9.70426
170	3	137032543	137036277	3734	10.6567	10.2727	10.357	10.8039	10.8528	10.3002	10.2493	10.8008	9.51978	9.51009	10.274	10.3434	10.3607	10.8821	10.2566	10.414	9.58254	10.2703	10.2556	10.3129	10.802	10.7934	10.891	10.2889	10.327	10.8331	10.7726	9.67043	10.3915	10.7574	10.3241	10.2652	9.27835	10.3331	10.7559	10.7026	10.1968	10.2956	9.46499	10.2301	10.2168	9.41421	10.2666	10.7412	10.3553
171	3	137487798	137529819	42021	9.7757	9.91126	9.65034	9.86358	9.67508	9.49363	9.75453	9.70039	9.71768	9.71986	9.53027	9.81026	9.546	9.53345	9.80187	9.72688	9.9089	9.62034	9.83583	9.74033	9.50683	9.872	9.4839	9.74565	10.2794	9.51174	9.51965	10.1176	10.0269	9.52363	9.50962	9.4999	9.62082	9.72916	9.673	9.4759	9.5951	9.91008	10.1499	9.58142	9.73166	9.82105	9.96249	9.55473	9.80746
172	3	138263100	138275710	12610	9.51444	10.1842	9.52648	10.0797	9.35309	9.49822	10.1343	9.61844	10.0538	10.6579	9.39619	10.1469	10.0755	9.47666	10.1408	10.136	10.5464	10.1514	9.40284	10.1279	9.34225	10.0811	9.50877	10.183	10.6303	9.40189	9.37643	10.5273	10.1017	9.31296	10.0279	9.40291	10.8324	10.1986	9.41774	9.45255	10.2042	10.1125	10.7081	10.0906	10.1028	10.6898	10.156	10.6446	10.1313
173	3	141381217	141384341	3124	9.49646	9.4574	10.1315	9.50811	9.48937	10.1594	9.53027	10.5149	10.1472	10.1577	9.36296	9.33078	10.1674	9.46352	9.41842	10.218	10.1659	9.36137	10.103	9.38521	10.1131	9.54058	9.47548	10.0439	9.47798	9.45179	10.0484	9.59102	10.1759	9.40711	9.52697	9.45745	10.0132	9.36896	10.4308	9.41587	10.4714	9.50845	9.46798	9.42604	9.50507	9.44166	9.38366	9.387	10.1905
174	3	141728366	141728691	325	11.1629	11.1405	11.1235	11.0175	11.0762	11.1263	11.211	11.0991	11.1029	11.1088	11.2015	11.1356	11.2327	11.1708	11.1772	11.1533	11.1993	11.0437	11.0903	11.1509	11.1327	11.1234	11.1935	11.1967	11.2425	11.1292	11.1856	11.1518	11.164	11.1431	11.2153	11.156	9.81268	10.9889	10.0916	10.3294	9.47618	10.7198	11.0608	10.0936	9.341	10.1258	11.116	10.3976	10.889
175	3	142632626	142644531	11905	9.70884	10.7191	10.6326	10.2831	10.3247	10.2172	10.4931	10.1767	10.2596	10.6676	10.1697	10.492	10.6588	10.1996	10.4888	10.4959	10.4219	10.687	10.6894	10.2715	10.6208	10.5151	10.5166	10.1921	10.7688	10.7108	10.402	10.4921	10.4753	10.5559	10.2647	10.7122	10.599	10.7757	10.5158	10.622	10.5316	10.3263	10.5581	10.3082	10.5097	10.2371	10.2087	10.5532	10.5832
176	3	142821258	142823735	2477	10.8209	10.9059	10.8511	10.8211	10.7826	10.5091	10.566	10.6704	10.772	10.5798	10.4611	10.4766	11.046	10.5518	10.5826	10.6429	10.6134	10.9457	9.84252	10.745	10.963	10.5383	10.5266	10.4579	10.9985	9.95735	10.6063	10.6854	10.5784	9.80448	10.7639	10.9164	10.6419	10.8877	10.8744	9.86756	11.1922	10.7223	10.4567	10.8318	10.6515	10.8017	10.3405	10.4825	10.6031
177	3	143512892	143520968	8076	9.71358	10.1757	10.3131	10.3804	10.2979	9.7778	9.079	9.91779	9.73835	9.73273	9.65258	8.82163	9.70377	10.2157	8.90077	9.013	9.64146	10.2282	9.81994	10.2942	9.75441	9.81386	9.75159	9.64638	10.3075	9.05993	9.71116	10.2315	9.72953	8.92286	9.61681	10.2022	8.74277	9.80212	10.2914	9.03348	10.2982	9.9284	9.64215	10.4357	9.13565	9.89749	9.73785	9.83367	10.018
178	4	3458919	3479026	20107	9.76633	9.755	9.8061	9.59912	9.79096	9.74063	9.8298	10.1103	9.97622	10.1212	10.179	9.88637	9.83195	10.1198	10.0866	9.76575	10.1497	9.80413	9.54652	10.2675	9.53171	10.1149	10.1982	10.1172	9.80768	10.2255	9.72467	9.75601	9.75939	9.81015	9.77444	10.1907	10.0272	9.81445	9.87918	9.88559	10.6685	10.2469	9.4998	10.4022	10.6813	10.0253	10.1073	10.3121	9.61358
179	4	6095005	6095833	828	8.17591	9.81099	8.14372	10.6984	9.80168	8.12364	8.07615	8.2472	7.99359	7.96108	7.96821	9.90562	7.88689	8.0323	8.10684	8.09667	8.11678	7.92114	8.06993	9.96892	8.19027	8.1835	8.04315	8.08993	7.99565	8.14721	8.05525	8.18979	8.10335	7.97625	8.105	8.08846	8.007	8.07144	9.81369	8.13961	8.01943	8.16331	7.90521	8.24147	8.09075	9.68613	7.98345	8.17419	9.56948
180	4	8414927	8415380	453	9.81311	10.4918	9.78169	9.69281	8.75234	9.91866	9.79041	9.23813	9.8298	9.74983	8.63955	9.76084	9.76448	8.60076	8.76798	10.5796	9.83345	9.55746	10.4489	8.66033	10.445	8.91555	9.74105	8.6216	8.77508	8.85904	9.66436	9.89938	10.4308	9.8343	9.78214	9.59455	9.64692	8.70257	8.89452	10.3649	8.61116	9.67173	10.4625	9.62702	9.60101	9.65514	9.75126	8.79628	10.4771
181	4	12377058	12377306	248	9.49292	10.7083	9.46954	10.8652	11.433	10.6906	9.47341	10.8127	10.7079	10.8175	10.7364	10.9049	10.7877	10.7576	9.3892	10.8637	10.749	11.4652	10.7461	11.5845	9.36376	11.3193	11.4782	9.24023	11.34	10.6994	11.3689	10.6566	10.7761	11.3131	11.3315	9.2228	10.7994	10.8801	11.5575	11.503	10.8384	11.5186	9.4714	9.60333	11.5028	10.9806	10.9129	11.5113	9.69887
182	4	19295055	19299440	4385	9.331	10.3263	10.2318	9.42357	9.32439	10.7284	10.2742	10.7356	10.7248	10.6872	10.7909	10.2448	10.9231	10.288	10.8088	9.3211	10.7819	10.3193	10.2449	9.27127	10.1544	10.7453	10.8475	10.2865	10.9912	10.7608	10.2869	10.5514	9.31634	10.7875	10.1911	10.7496	10.2169	10.7216	10.1942	10.1949	11.1073	10.3498	10.8874	10.3145	10.631	10.3282	10.1328	10.2329	9.3288
183	4	21584773	21585024	251	9.90267	10.0579	10.6235	10.641	10.5108	10.6252	10.4996	10.4842	10.0197	9.90455	10.4431	10.5175	9.78536	10.6689	10.5387	9.00035	9.92975	9.6929	10.5691	10.5438	10.5425	10.6544	9.91945	10.6395	10.7203	10.4899	10.6083	10.5644	9.10523	10.5013	10.5114	10.6419	8.97515	9.84561	9.29731	9.86115	9.28836	9.66206	10.5455	9.76028	9.39951	9.69335	10.7014	9.47866	10.5979
184	4	29707218	29784325	77107	10.2676	10.706	10.5112	10.6379	10.619	10.5277	10.5689	10.4066	10.4572	10.2589	10.3244	10.7214	10.7037	10.5988	10.5811	10.2799	10.5642	10.6217	10.1977	10.3122	10.5482	10.5601	10.337	10.6131	10.3479	10.5521	10.6357	10.5654	10.3087	10.6053	10.4912	10.6028	10.087	10.5775	10.2536	10.2279	10.3688	10.2546	10.7598	10.6472	10.7784	10.7735	10.3241	10.2332	10.3825
185	4	30266433	30312363	45930	9.79963	9.77853	8.72398	8.82513	8.71487	8.77999	8.73952	8.90408	9.92735	9.88963	9.85169	8.67286	8.61857	8.70801	8.66308	9.84815	8.69913	8.63816	9.80079	9.81941	8.7603	8.77211	9.87435	8.6889	9.64016	8.75855	8.70965	8.83429	9.87568	8.65436	8.79704	8.69809	8.72839	8.70498	9.79703	9.9244	9.8819	9.80963	8.73372	8.80833	9.87729	8.70305	9.80728	9.82262	8.90842
186	4	56211617	56212288	671	10.8054	10.8347	10.7644	10.8026	10.8665	10.9184	9.56049	10.2608	10.8607	10.8414	10.2069	10.8526	10.9407	10.9168	10.7792	10.1871	10.824	10.2961	10.9086	10.9015	10.1951	10.9192	10.2421	10.3033	10.8559	10.8936	10.9738	10.8896	10.3176	10.3009	10.9299	10.9038	10.6618	10.8142	9.9609	10.7499	9.92107	10.1447	10.7416	9.44899	10.4098	10.6667	10.6963	10.7066	10.7207
187	4	57769227	57769969	742	9.70046	10.2137	9.67223	10.1232	10.1313	9.94416	10.0595	9.98134	9.66728	9.92926	9.81352	9.97755	9.57137	10.2227	9.66195	9.67403	9.62161	9.91463	9.74129	9.87824	9.88686	9.99622	9.80563	9.85792	9.94033	10.1846	9.94479	9.93705	9.59301	10.1357	9.98931	9.71786	10.1942	9.86186	9.9355	9.23456	9.82055	9.63836	10.1325	9.72259	9.60453	9.73435	9.60969	9.79698	9.67128
188	4	71762125	71768691	6566	10.9018	9.41785	10.9022	9.5819	9.56936	10.9268	9.56298	10.3973	9.55294	10.8602	10.8926	10.8709	9.224	10.2557	10.3061	10.9005	10.3427	10.3124	10.8953	10.9005	10.3823	10.9216	9.38105	10.3767	10.9795	10.3793	10.3477	10.3585	10.1986	10.845	10.9167	10.3629	10.2183	9.60021	9.55356	10.1809	10.1941	10.2934	10.2283	10.3159	9.43909	10.7928	10.7997	10.3534	10.9396
189	4	77028168	77043306	15138	10.731	10.1833	10.2493	10.8131	10.6765	10.7546	9.48488	10.1698	10.6884	10.2019	10.738	10.7392	9.38428	9.41711	9.39685	10.1997	10.2182	10.1163	10.2496	10.1986	10.308	10.7591	10.1791	10.0851	10.158	10.2552	10.1568	10.2812	10.7952	10.7493	10.2158	10.2589	10.526	10.0296	9.38736	10.1397	9.9933	10.2087	10.7504	10.2425	10.0384	10.7362	10.6204	10.1158	10.2406
190	4	77228417	77255056	26639	10.5861	10.2336	10.2321	10.6169	10.6595	10.6729	9.51046	10.3134	10.6888	10.6707	10.6549	10.6372	9.41857	9.47337	10.2259	10.2969	10.2236	10.2019	10.6193	10.6746	10.2687	10.5857	10.2298	10.252	10.6477	10.2083	10.1741	10.3206	10.6611	10.6928	10.2258	10.2209	10.4881	10.1944	9.46495	10.1708	10.0631	10.6026	10.6558	10.6522	10.1154	10.5836	10.6346	10.1582	10.2542
191	4	81900655	81923439	22784	10.054	10.7758	9.83797	10.0317	10.0627	9.86379	10.015	9.83112	9.80381	9.76922	10.0648	10.7618	9.77107	10.689	9.80944	10.1417	9.76572	10.7257	9.76443	10.0736	10.0201	10.101	9.80139	10.1208	10.8056	10.047	9.69161	10.1082	9.97906	10.6328	10.5351	9.98365	10.0393	10.7279	9.70759	10.1147	9.78077	10.0013	10.7266	9.8088	10.079	10.7843	10.0765	9.7056	10.0612
192	4	89041272	89044023	2751	9.87305	9.63508	9.98349	9.62482	9.68058	9.87418	9.89885	9.90603	9.63749	9.86696	9.65626	9.65112	10.2406	9.89767	9.93655	9.6978	9.70935	9.66028	9.64349	9.88035	9.92293	9.89641	9.9075	9.87947	10.2036	9.9055	10.232	9.80601	9.65906	9.86964	9.90825	9.90639	10.0216	9.69015	10.4579	9.90804	9.69465	9.71185	9.60375	9.56758	10.05	9.65868	9.91106	10.3625	9.88611
193	4	89324010	89327913	3903	10.5299	10.6031	10.3198	10.4773	10.4864	10.248	10.1906	10.3707	10.5557	10.2378	10.4814	10.5505	10.3345	10.678	10.3171	10.587	10.615	10.4318	10.5135	10.2307	10.2369	10.5643	10.2954	10.2131	10.5938	10.2213	10.2465	10.2548	10.4666	10.2002	10.4477	10.2321	9.58289	10.542	9.97242	10.2133	9.78545	10.4491	10.3945	10.139	9.51787	10.1623	10.2564	10.0483	10.2828
194	4	98039179	98039527	348	10.4228	8.85848	10.4176	8.9272	8.90839	10.2897	9.00388	10.4999	10.4328	8.78738	10.3498	10.3952	8.50147	8.62791	11.1475	10.4136	10.4644	8.45029	11.2913	10.3834	8.76511	8.8732	10.4014	10.4874	8.79087	8.82438	8.64601	8.92099	10.4764	8.6017	10.3611	10.34	11.3696	8.75947	8.96314	8.82268	10.7137	10.4885	8.77272	10.5481	9.0775	10.3923	11.3263	8.96665	10.3706
195	4	99656586	99659910	3324	9.68235	10.2608	9.70608	10.4039	10.3622	10.1824	10.3661	10.16	9.70646	10.2078	10.1577	10.22	10.4781	10.3233	10.3142	10.4167	10.3395	10.4311	9.69246	10.6135	9.73977	10.2611	10.2947	10.2704	10.3194	10.5029	10.5705	10.5016	10.34	10.3218	9.7154	10.2668	9.85934	10.3987	9.76546	9.73729	9.74127	9.90811	10.0763	9.81046	9.99946	9.7748	10.1963	9.80719	9.88641
196	4	101601485	101601817	332	10.0902	10.011	10.2023	10.2087	10.0922	9.8964	10.8795	9.8414	10.0321	10.8932	9.05837	11.0305	10.996	10.0015	10.1421	10.8893	10.1093	11.0103	10.9708	11.0643	10.7141	10.8921	10.174	10.1074	10.8261	10.8837	11.0404	9.80383	10.8652	10.991	10.1187	10.9204	10.3152	8.89382	10.8841	10.815	8.95159	11.0633	10.1257	10.183	10.4388	11.0131	10.9827	10.9971	9.8728
197	4	105739813	105741093	1280	9.83977	9.82554	9.06635	9.6101	9.75583	10.1002	9.05189	9.99877	10.1753	10.0368	10.3589	8.88665	9.9037	9.0428	9.10611	10.328	10.3349	10.2048	10.3954	9.84309	10.1109	10.1442	8.91126	9.83466	10.2453	9.81141	8.99851	9.23125	9.16759	9.84448	9.85313	9.04954	8.76278	8.96467	8.87502	9.68719	9.3948	9.97411	10.3987	9.94063	9.31392	8.96227	8.92797	9.54538	9.81946
198	4	108610948	108611085	137	10.1447	10.1852	9.55885	10.2842	10.2718	9.38174	10.1146	9.47835	9.52011	9.53722	9.65302	9.36163	9.52971	10.0716	10.1013	10.0127	10.0647	9.90331	9.80997	10.2355	9.46489	9.52082	9.58305	9.55716	10.2463	10.1507	9.62346	9.72811	10.2148	10.2811	10.1702	8.41632	9.81716	9.52652	9.32202	9.29515	9.09153	9.67417	10.2473	9.89434	9.26847	9.39208	10.1023	10.0043	10.0365
199	4	111745396	112286229	540833	9.38933	9.93323	9.45616	10.2432	10.2278	9.45715	9.87101	9.51689	10.1916	9.88981	9.91223	9.39982	9.94534	9.41602	9.94385	9.99289	10.2829	10.2568	9.97196	9.97344	9.9789	9.48404	9.38641	9.93237	9.9649	9.94239	9.93402	9.94979	10.2348	10.2324	9.91338	9.43282	9.84145	9.35802	9.88657	9.40592	10.2196	10.1979	10.2521	10.2376	9.93522	9.4459	9.37961	9.42243	10.1456
200	4	112348832	113968233	1619401	9.94036	10.3218	10.2488	10.5131	10.5158	10.2305	10.1449	10.2123	10.4484	10.2848	10.2864	10.2097	10.3006	10.0803	10.1764	10.311	10.4939	10.5194	10.2927	10.1774	10.2064	10.2349	10.0747	10.3085	10.3211	10.1836	10.3143	10.293	10.5141	10.5148	10.1578	10.2358	10.1094	10.1977	10.302	10.2354	10.5506	10.4549	10.537	10.5493	10.2627	10.3013	9.93204	10.096	10.4207
201	4	121651872	122237050	585178	10.0487	9.2688	9.41154	9.31253	9.28175	9.39306	9.31357	10.1547	9.32612	9.27195	9.17251	9.1306	9.18164	9.26323	9.25039	9.30189	9.24446	9.11901	9.26733	10.0609	9.3525	9.33821	9.21399	9.19717	9.26606	9.31973	9.23171	9.39266	9.3154	9.2037	9.31154	9.2696	9.1803	9.20809	9.28353	9.26123	9.17792	9.25167	9.22586	9.32085	9.28143	9.30834	9.19306	10.0402	9.49232
202	4	143201660	143205948	4288	9.49687	10.0966	9.48048	9.47274	9.45634	10.1219	9.44594	9.46365	9.50958	9.374	9.42255	9.53247	9.44178	9.46014	9.47582	9.53167	9.50831	9.42191	9.48128	9.44752	9.57264	9.51097	9.46478	9.51497	9.51324	9.59038	10.1951	9.49656	9.4241	9.39298	9.50007	9.50648	9.54931	9.50427	10.26	10.2065	9.6124	9.62155	10.2299	9.57718	9.64894	9.62781	9.52688	10.2769	10.128
203	4	143539831	143555553	15722	9.63311	10.3874	9.61067	9.7498	9.73854	10.1887	9.53939	9.37267	9.52065	9.58378	9.75688	9.69876	9.65105	9.53129	9.59443	9.55636	9.59849	9.71479	9.733	9.74081	9.72644	9.69992	9.60026	9.70912	9.73566	9.70734	10.3661	9.55589	9.59478	9.53298	9.54081	9.72017	9.5674	9.60354	10.0487	10.1062	9.49128	9.56497	10.2612	9.67612	9.61149	9.77931	9.66824	10.2117	10.1395
204	4	144334174	144334795	621	10.1162	10.2644	8.78449	10.1495	8.62918	10.0868	8.58043	10.0924	8.63187	8.56372	8.37173	10.0978	8.39987	8.56833	8.5991	8.71244	8.59123	8.44907	8.66963	10.0676	8.75242	8.7046	8.4859	8.51449	8.5146	8.62613	10.1728	8.70999	8.7607	8.5005	8.58033	8.57929	8.4545	8.50175	10.0182	9.91652	8.49717	8.53109	10.1324	10.0162	8.57845	10.0768	8.48227	10.0189	10.6567
205	4	145452418	146034593	582175	10.8172	11.0236	10.7773	10.8608	10.5196	10.8447	10.7627	10.9228	10.4051	10.4335	10.4552	10.7527	10.7712	10.4038	10.7656	10.4194	10.9353	10.4508	10.4671	10.9963	10.4907	10.8196	10.4473	10.4505	10.85	10.4708	11.053	10.7678	10.3931	10.4057	10.751	10.4767	10.3729	10.365	10.9232	10.7511	10.4173	10.4485	10.8586	10.8141	10.8211	10.8592	10.7508	11.1727	11.1033
206	4	146941153	147202567	261414	10.6289	10.8365	10.573	10.6756	10.2182	10.5689	10.5243	10.6664	10.1304	10.1543	10.1495	10.5683	10.601	10.1738	10.5516	10.1781	10.7592	10.1424	10.2118	10.8568	10.2094	10.6267	10.178	10.15	10.6175	10.2473	10.6952	10.5569	10.1827	10.1377	10.5617	10.2069	10.0553	10.0721	10.5964	10.4892	10.0958	10.1663	10.6561	10.6455	10.6836	10.6963	10.5539	10.9007	10.7929
207	4	155497765	155507226	9461	10.5534	10.8885	10.811	10.791	10.833	10.8071	10.8101	10.6743	9.93993	9.99249	10.5783	10.8616	10.8064	10.8089	10.491	9.99535	10.8309	10.5451	10.8673	10.5917	10.0348	10.7786	9.95238	10.5919	10.6316	10.8187	10.9704	10.4753	10.0241	10.8077	10.7567	10.5609	10.6893	10.5693	10.7926	10.8402	10.8363	10.6348	10.6285	10.5747	10.8147	10.8589	10.8628	10.8921	10.7181
208	5	3499602	3519482	19880	10.0295	10.3651	10.0183	10.3351	10.3457	10.04	10.0283	9.99872	10.0437	9.97143	10.7556	10.0006	10.3931	10.4041	10.764	10.3582	10.3771	9.86197	10.376	10.3832	9.97573	10.6623	10.0653	10.7645	10.4677	10.3715	10.3864	10.684	10.3627	10.422	10.3504	9.99734	10.129	10.814	10.0105	10.412	10.8024	10.4268	10.781	10.3637	10.4529	9.91153	10.4373	9.92355	10.2991
209	5	3884799	3922844	38045	10.2394	10.3322	10.2847	10.2746	10.3173	10.2137	10.2247	10.1821	10.1999	10.2396	10.7752	10.2749	10.3375	10.3428	10.7453	10.3096	10.3399	10.3117	10.396	10.337	10.2725	10.7207	10.3078	10.77	10.3388	10.3601	10.3322	10.6862	10.3395	10.3506	10.3233	10.2688	10.2653	10.7664	10.3042	10.393	10.9852	10.3656	10.829	10.3753	10.5243	10.3739	10.3299	10.3135	10.2764
210	5	4844004	4869796	25792	9.88378	10.3594	9.88559	10.3061	10.3208	9.8502	9.82149	9.93855	9.86869	9.80939	10.7405	9.77703	10.3954	10.3854	10.8118	10.3386	10.1882	9.81445	10.345	10.3851	9.88577	10.7673	9.84259	10.7511	10.3408	10.3319	10.3115	10.7925	10.3503	10.3132	10.3291	9.79772	9.83034	10.7462	9.94471	10.2237	10.8161	10.3259	10.8037	10.3472	10.3158	9.98643	10.2561	9.8791	10.3749
211	5	5129103	5135345	6242	9.76634	9.89403	9.76787	9.92035	9.89234	9.74961	9.77164	9.68903	9.71213	9.78148	10.4779	9.74018	9.9451	9.8822	10.4191	9.82745	9.9054	9.81907	9.85727	9.93638	9.7545	10.412	9.81327	10.4138	9.86028	9.89607	9.91648	10.3144	9.8816	9.99124	9.88614	9.75145	9.67911	10.3878	9.71942	9.8613	10.3396	9.88795	10.566	9.98544	9.86657	9.78645	9.90464	9.70607	9.84867
212	5	5538674	5547973	9299	9.76667	9.99867	9.75404	9.9794	9.96809	9.80894	9.76824	9.77661	9.75216	9.79762	10.3115	9.70926	9.98648	9.88617	10.2397	9.98638	9.92249	9.73896	9.88869	9.91802	9.77115	10.1833	9.69375	10.2758	9.96162	9.96237	9.95712	10.2023	9.93992	9.96608	9.90639	9.8109	9.70017	10.132	9.69143	9.95318	10.4921	9.84959	10.2997	9.93247	10.0939	9.72431	9.86492	9.73007	9.80406
213	5	5584666	5584972	306	9.21433	10.1132	9.28771	10.0798	10.0901	9.28205	9.14521	9.43714	9.2793	9.16009	10.3532	9.2106	10.038	10.0224	10.6053	10.0837	10.1079	9.10649	9.99208	9.93732	9.27319	10.5454	9.11382	10.5306	10.0848	9.98377	9.94019	10.6215	10.0145	9.97678	10.0679	9.13924	9.12835	10.3255	9.21102	9.87117	10.1615	9.94019	10.3893	9.87115	9.74629	9.22186	10.0183	9.20878	10.0234
214	5	5954742	6110511	155769	8.98286	10.1379	9.09351	9.8693	9.82552	9.0387	8.99165	9.27729	9.04687	8.9506	10.311	8.73624	10.1171	10.1591	10.3897	10.1614	10.0828	8.71346	10.1476	10.0978	9.09243	10.398	8.8323	10.6906	10.136	10.1146	10.0439	10.3984	10.1725	10.1324	10.1089	8.93669	8.78745	10.4542	8.94816	9.84321	10.4724	9.90592	10.4014	10.1646	9.953	8.96058	9.79203	8.95424	10.1765
215	5	6935526	6993918	58392	9.74731	10.1911	9.77546	10.2314	10.2876	9.66185	9.80026	9.6633	9.68615	9.73399	10.5578	9.66713	10.2654	10.2317	10.6236	10.2354	10.1426	9.79387	10.1336	10.2143	9.66421	10.6018	9.7298	10.7373	10.1759	10.223	10.1866	10.4907	10.2895	10.2652	10.2273	9.6728	9.37647	10.6829	9.5436	10.203	10.5196	10.1805	10.6625	10.2397	10.0817	9.65722	10.222	9.61581	10.0871
216	5	7031786	7048239	16453	10.3711	10.0029	10.4146	9.94898	9.91455	10.3601	10.5053	10.421	10.4157	10.3883	10.2182	10.3726	9.70685	9.73585	10.2869	9.75312	9.82615	10.4122	10.0639	9.68395	10.4478	10.3446	10.3879	8.29392	9.70066	10.0153	9.56446	10.3298	9.74936	9.73926	9.84515	10.343	10.1102	10.2521	10.3052	9.86089	10.2468	9.90315	10.252	10.0067	9.91787	10.2728	9.79289	10.181	9.90893
217	5	7052180	7171279	119099	9.96412	10.0777	9.94955	10.102	10.1595	9.893	9.8854	9.93958	9.90197	9.90492	10.3555	9.87277	10.2545	10.2511	10.482	10.1888	10.2284	9.89919	10.1714	10.196	9.93615	10.4059	9.9282	10.513	10.1368	10.2011	10.2041	10.2727	10.2843	10.2707	10.231	9.92136	9.81045	10.4316	9.91226	10.1694	10.6405	10.174	10.3854	10.2701	10.2428	9.96592	10.1674	9.86958	10.1841
218	5	7989617	8014367	24750	9.80664	9.62933	9.74595	9.65613	9.64983	9.19789	9.62546	9.31831	9.15317	9.774	10.2017	8.92672	9.76477	9.75846	9.72124	9.81557	9.66707	8.92085	9.73078	9.74984	9.13034	10.1993	9.76241	10.4772	9.76059	10.4408	9.82235	10.164	10.5004	9.65351	9.69275	9.07554	8.84636	10.439	9.01109	9.00339	9.77345	9.77845	10.1821	9.93822	10.3324	9.02901	9.6224	8.94914	9.90995
219	5	10100240	10117317	17077	10.6295	10.2628	10.6641	10.7101	10.6768	10.7649	10.5553	10.8368	10.7765	10.6477	10.3391	10.7753	10.6378	10.68	9.86882	10.7586	10.6862	10.7438	10.6434	10.5727	10.8272	10.422	10.6128	10.3652	10.6733	10.4019	10.6223	10.4234	10.4379	10.6245	10.6397	10.7846	10.568	10.5534	10.7512	10.2729	9.59291	10.0382	10.0795	10.7037	10.072	10.792	10.2432	10.7079	10.6695
220	5	10562250	10612072	49822	10.218	9.85514	10.2793	10.2345	10.2761	10.2587	10.2546	10.2014	10.2756	10.2362	10.2672	10.2592	10.3321	10.2782	9.28744	10.2935	10.2827	10.2743	10.3153	10.2806	10.2685	10.2757	10.2504	10.2297	10.2797	10.2587	10.3276	10.3276	10.3588	10.3267	10.2364	10.2851	10.0905	10.1539	10.1767	9.77305	9.39052	9.7284	9.74892	10.3004	9.85585	10.1747	9.75394	10.1681	10.2097
221	5	10785521	11246794	461273	10.7323	10.8121	10.7537	10.8022	10.8235	11.091	10.6738	10.9873	11.0124	10.7457	10.489	11.1151	10.7807	10.8047	10.561	10.7481	10.7266	11.0701	10.764	10.7849	11.1054	10.5915	10.7828	10.4425	10.8072	10.503	10.7871	10.4135	10.4302	10.6819	10.7638	11.1309	10.777	10.6616	11.0165	10.6727	10.4434	10.3862	10.5585	10.7795	10.566	11.1898	10.6611	11.0225	10.5942
222	5	12178347	12178906	559	10.926	10.7248	10.6835	10.8494	10.8476	10.7845	10.8277	10.6623	10.7468	10.8915	10.9474	10.9946	10.9634	10.8486	10.5952	10.9211	10.8549	11.0161	10.8776	10.9503	10.6479	10.8071	10.9221	10.9753	10.96	10.9423	10.8771	10.8057	10.8863	10.8511	10.7284	10.9816	9.72428	10.98	10.0649	9.94801	9.38668	10.2077	10.6269	10.2598	9.2812	10.2696	10.7149	10.4761	10.7644
223	5	24721251	24722132	881	10.1444	10.8819	10.2009	10.6987	10.6258	10.5786	10.8911	10.5798	10.119	10.2027	10.2451	9.75643	10.6394	10.5848	10.8644	10.8049	10.941	10.9233	10.7126	10.8891	10.8377	10.65	10.8951	10.1513	10.9321	10.2861	10.982	9.96075	10.911	10.0942	10.6425	10.181	11.0753	10.4299	10.8743	10.171	10.5206	10.6948	10.0747	10.805	10.5593	9.9174	10.8423	9.91758	10.1966
224	5	24735376	24752262	16886	10.0674	10.2552	10.0225	9.72662	9.75331	9.78367	10.1262	9.76533	9.99413	10.0116	10.109	9.63586	9.73759	9.79449	10.21	10.2138	10.196	10.2082	9.66436	10.2024	10.1552	9.8123	10.1868	10.1227	10.2636	9.99955	10.1885	9.68404	10.1615	9.6461	9.75313	10.0054	9.20431	9.75839	10.1431	10.0717	10.1027	9.71042	10.0563	9.75365	10.0881	9.6479	10.1902	10.0296	9.99532
225	5	37404544	37441150	36606	10.2507	10.5971	10.006	10.2488	10.229	10.5833	9.95601	10.2678	10.2525	10.265	10.2503	10.2445	10.5257	10.6009	10.6555	10.2123	10.2659	10.6403	10.2492	9.89324	10.2463	10.2692	10.3029	10.2714	10.2654	10.2454	10.3011	9.97038	10.2281	10.2494	10.614	10.2546	9.87561	10.348	10.5785	10.6306	10.6658	10.6151	10.2446	10.3652	9.79663	10.1862	10.3044	10.6344	10.2985
226	5	52175933	52192752	16819	9.53027	9.27354	10.0141	9.69669	9.69875	9.79977	9.8363	9.36815	9.53714	9.87773	9.78379	9.80777	9.98668	10.1561	9.96775	9.21604	9.34294	10.0007	10.0385	9.75631	9.33571	9.3472	9.82517	9.93107	9.98878	9.89655	9.25309	9.90904	9.36197	9.35451	10.0033	9.90859	10.1286	9.32477	9.48995	9.42826	9.85973	10.376	9.33721	9.58777	10.1233	9.98136	9.61842	9.91359	9.7292
227	5	54011829	54052518	40689	9.37784	10.0806	9.47141	9.498	9.50552	9.44144	9.44674	9.89939	9.45129	10.0263	10.0453	10.11	9.45892	9.98215	9.43257	10.0635	9.39379	9.38006	9.43463	9.41329	9.44647	9.39121	10.0027	10.0664	10.0502	9.43689	10.4711	9.50767	9.49286	10.0594	9.33306	10.0139	9.81666	10.4197	9.90251	9.93719	9.84254	9.3831	9.52966	9.34331	9.75299	9.92984	10.1307	9.42985	9.42551
228	5	54883390	54937412	54022	10.0505	10.423	10.3319	10.4053	10.4723	10.3714	10.0148	10.3148	10.3146	10.0537	10.4725	10.4278	10.4387	10.307	10.3647	10.3714	10.3775	10.4475	10.0565	10.4361	10.36	10.0969	10.016	10.4387	10.4005	10.3512	10.4417	10.0148	10.3693	10.4327	10.4008	10.0589	10.2878	10.3239	10.3337	10.3108	10.334	10.3055	10.4848	10.3241	10.3194	10.3613	10.3928	10.3209	10.1993
229	5	55418075	55483118	65043	10.0404	10.4771	10.3878	10.5542	10.5406	10.4165	9.98084	10.3945	10.4848	10.0318	10.5317	10.5609	10.5273	10.4038	10.5075	10.4723	10.425	10.6014	10.0524	10.5431	10.5232	10.0185	10.086	10.4712	10.3599	10.458	10.496	9.97903	10.4851	10.4861	10.4273	9.99825	10.307	10.4688	10.5321	10.4607	10.4455	10.5297	10.5982	10.5717	10.4583	10.5904	10.4772	10.4765	10.3584
230	5	56051344	56105526	54182	10.4897	10.8369	10.7733	10.8507	10.8613	10.7865	10.436	10.6967	10.751	10.4826	10.8754	10.8601	10.8668	10.8096	10.8052	10.7841	10.778	10.817	10.4546	10.8873	10.8045	10.515	10.4978	10.7736	10.8422	10.7883	10.7864	10.4062	10.8042	10.7708	10.7634	10.4601	10.407	10.6988	10.6999	10.6595	10.7654	10.7441	10.8888	10.8029	10.8302	10.7785	10.8155	10.7191	10.5932
231	5	56305332	56639679	334347	10.0407	10.4503	10.3174	10.4585	10.4367	10.3371	10.0111	10.2459	10.2999	10.0506	10.4501	10.4672	10.4599	10.416	10.3717	10.368	10.3699	10.4388	10.0103	10.4384	10.3628	10.047	10.0821	10.3919	10.3613	10.3687	10.4232	10.011	10.4209	10.425	10.3281	10.0376	10.1677	10.3905	10.35	10.3714	10.3833	10.3321	10.5313	10.4678	10.4616	10.4919	10.4382	10.4036	10.3136
232	5	57133588	57340535	206947	10.2333	10.582	10.5062	10.5615	10.5433	10.4956	10.2095	10.4441	10.4581	10.2371	10.5657	10.58	10.6071	10.5622	10.5634	10.5653	10.5533	10.6003	10.2108	10.5421	10.5185	10.2265	10.237	10.4951	10.5177	10.5039	10.5147	10.2474	10.5535	10.5225	10.512	10.2134	10.2872	10.4627	10.5119	10.5197	10.5739	10.5168	10.5802	10.6167	10.6696	10.6038	10.5179	10.4878	10.4029
233	5	57523177	57665253	142076	9.89756	10.3561	10.2191	10.2825	10.3297	10.2308	9.86954	10.2095	10.2337	9.86992	10.3369	10.3416	10.3717	10.2952	10.2904	10.2868	10.3081	10.328	9.89403	10.3123	10.2855	9.92161	9.89261	10.2824	10.296	10.2581	10.3229	9.9063	10.3236	10.3367	10.287	9.86738	10.2979	10.2441	10.3297	10.3411	10.5341	10.2638	10.3576	10.3944	10.5297	10.4053	10.2988	10.2814	10.1467
234	5	57802748	57881343	78595	10.3207	10.7853	10.7902	10.7909	10.7939	10.8047	10.3381	10.6896	10.7472	10.3843	10.8132	10.8459	10.8573	10.7934	10.8083	10.8194	10.7831	10.8347	10.3806	10.7754	10.768	10.3314	10.3954	10.828	10.7416	10.7384	10.7744	10.3789	10.825	10.7956	10.7566	10.383	10.6114	10.7452	10.7904	10.775	10.902	10.784	10.7979	10.8458	10.9096	10.8085	10.7746	10.67	10.6266
235	5	58053095	58082352	29257	10.2865	10.612	10.4722	10.5734	10.5657	10.5372	10.1581	10.4654	10.5356	10.1293	10.5796	10.6268	10.6573	10.6203	10.5483	10.597	10.4754	10.5321	10.0728	10.5578	10.5419	10.418	10.1808	10.5272	10.5964	10.5473	10.5262	10.2236	10.6419	10.6095	10.5139	10.1328	10.6731	10.4917	10.4825	10.5381	10.7184	10.4439	10.5368	10.6663	10.7532	10.6162	10.4651	10.3746	10.4241
236	5	58311716	58332254	20538	10.3761	10.4869	10.2853	10.388	10.4703	10.2868	10.0198	10.2125	10.3876	9.99779	10.5029	10.5638	10.6006	10.5504	10.3869	10.4489	10.4282	10.5683	10.0199	10.4341	10.3259	10.3689	9.99522	10.4538	10.427	10.374	10.4197	10.0261	10.5184	10.4976	10.3907	9.99698	10.5154	10.5223	10.5281	10.631	10.8799	10.4049	10.5974	10.6425	10.7692	10.705	10.5183	10.5103	10.3176
237	5	59737484	59830718	93234	10.46	10.4752	10.3596	10.5279	10.511	10.4492	10.045	9.9699	9.98026	10.4935	10.4952	10.0741	10.1374	10.0526	9.99743	10.0749	10.0245	10.5128	10.0315	9.99259	10.4391	10.0625	10.0651	9.95824	10.0288	10.4239	10.4353	10.4401	10.0859	10.4977	10.0748	10.421	10.5307	10.4283	10.5714	10.1125	10.784	10.0215	10.1086	10.2496	10.3156	10.2083	10.4634	10.0054	10.3933
238	5	61916323	61982272	65949	10.6445	10.2111	10.6256	10.1513	10.1871	10.1393	9.37056	10.0844	10.4878	10.195	10.23	10.2533	10.2213	10.231	10.2719	9.43769	9.44008	10.5995	9.41433	10.2236	10.2161	10.1991	9.44876	9.39802	10.1872	10.5374	10.1747	10.163	9.44813	10.661	10.2228	9.38221	9.20039	9.37694	10.1052	9.40959	10.285	10.1745	10.2006	9.47374	10.6693	10.1969	10.1851	10.0506	10.0351
239	5	63315493	63315979	486	8.31459	9.73621	8.49578	10.5077	10.512	9.78049	10.3905	10.2849	9.59676	9.6922	10.513	10.4466	10.4157	9.76028	9.82695	10.3715	10.4099	9.71772	10.3552	9.75982	9.65492	9.87562	10.3655	10.5881	10.4853	9.86207	10.5349	10.2515	10.4277	8.1346	10.332	10.5009	10.2804	10.4458	9.77723	10.4492	9.70203	9.64905	9.81128	10.4909	9.82904	10.5015	10.5399	10.4775	9.85382
240	5	65457666	65458442	776	8.83421	10.847	10.2083	10.8378	10.8766	10.8408	10.8806	10.7644	10.8972	10.891	10.9143	10.8725	10.8969	10.7596	10.8509	10.7424	10.9083	10.8895	10.9323	10.9332	10.8815	10.2389	10.9177	10.9206	10.7556	10.9215	10.9229	10.7612	10.946	10.9817	10.9227	10.9692	11.1606	10.9439	10.981	10.9934	11.3076	11.0342	10.8586	10.9924	11.2659	11.0447	10.9234	10.9873	10.1816
241	5	72864953	72887910	22957	9.85253	11.3263	10.9774	10.0178	9.88049	10.9711	10.9006	10.2794	10.0939	11.4004	10.9632	10.969	11.2369	10.8972	10.9084	10.8477	9.93437	11.0376	11.3732	10.9592	10.9002	10.9228	10.9423	10.8705	9.85809	10.941	9.7543	11.2974	10.934	9.80814	11.3646	10.946	10.7062	9.70861	9.71927	10.7981	10.6123	10.7536	11.1991	9.96493	9.74783	10.9168	11.1844	10.7592	10.3691
242	5	73849774	73880229	30455	9.77622	10.6821	10.1628	10.2554	10.2369	10.2532	10.1707	10.3372	10.26	10.6832	10.1937	10.6521	10.2292	10.2613	10.7466	10.2331	10.2989	10.6765	10.2818	10.7101	10.7165	10.218	10.2695	10.7114	9.79923	10.2362	10.1988	10.6548	10.2275	10.2305	10.2864	10.2662	10.0624	10.1534	10.5406	10.5009	10.467	9.80899	10.6197	9.71598	10.1135	10.5219	10.6559	10.6009	10.1861
243	5	77492850	77510553	17703	10.5716	10.1816	10.0918	9.86166	9.89108	10.2174	10.275	10.094	10.2726	10.0732	10.0441	10.5663	10.5216	10.0366	10.6101	10.6069	10.2868	10.234	10.5804	10.2241	10.3226	10.0806	10.0076	10.0319	10.1943	10.6061	10.5752	10.5375	9.37219	9.90261	10.5451	10.237	10.3882	10.0926	10.3285	10.2031	9.43676	10.6146	10.2727	10.6469	10.6181	10.6524	10.2406	10.5988	10.6226
244	5	77654536	77670776	16240	8.97113	10.522	9.88265	9.74851	9.77001	10.4988	10.5377	10.0068	10.4419	10.4816	9.85339	10.4219	10.4198	9.83669	10.4466	10.4832	10.442	9.86487	10.5162	10.5023	10.4972	9.91907	9.80738	9.89802	10.5057	10.511	10.5655	10.5204	9.88578	9.86658	10.355	10.4382	10.4377	10.0136	10.5643	9.99191	8.8952	10.5657	10.61	10.445	10.1988	10.5023	10.5837	10.699	10.6283
245	5	79306300	79320284	13984	10.0996	10.169	10.0747	10.6872	10.7204	9.9861	10.1187	10.659	10.1118	10.1025	10.1002	10.0804	10.1211	10.1148	10.0844	10.0596	10.1588	10.7463	10.1111	10.1988	10.2438	10.2043	10.1585	10.0952	10.7279	9.99122	10.0367	10.069	10.1006	10.6962	10.0845	10.0384	10.1706	9.94854	10.134	10.192	11.0604	10.0649	10.0298	10.1742	10.3095	10.1542	10.0744	10.0404	9.85639
246	5	84551530	84563500	11970	9.92399	9.87118	10.0406	10.3268	10.3848	10.7292	10.344	10.0671	10.359	10.7936	10.7441	10.2622	10.2645	9.89965	10.7547	9.97942	9.955	10.7463	10.3148	9.8672	10.7775	10.3625	10.7149	9.83014	10.2855	10.7924	10.2711	10.6513	10.7469	10.334	10.3499	10.764	10.2601	10.6816	10.2443	10.7389	9.85729	9.93872	9.85229	9.98625	9.95129	10.3287	10.2283	10.7232	10.3488
247	5	85651181	85653617	2436	8.91946	8.99515	8.87229	9.88708	9.96368	10.438	9.93845	9.00766	9.85534	10.5065	10.6036	10.0775	9.98035	8.79702	10.4273	8.81836	8.74085	10.5347	9.89256	8.98846	10.5295	9.89966	10.4984	8.94489	9.82921	10.4886	9.99577	10.4522	10.4633	10.0181	10.0211	10.5367	10.1193	10.4886	10.0093	10.6103	9.20847	9.05929	9.1883	9.03522	9.38863	10.0997	9.97237	10.5412	10.0301
248	5	88583061	88583112	51	9.50534	9.4175	9.41263	10.9681	10.8177	9.54368	9.3907	9.62326	9.47876	9.5461	9.34369	9.3119	9.53579	9.4906	9.59751	9.75496	9.65706	9.4586	9.58091	9.45774	9.51517	9.46762	10.9424	9.46501	9.40298	9.71714	9.41056	9.60031	9.72206	9.4823	9.55734	10.8636	9.31767	9.30528	9.3941	9.37393	9.24351	9.45884	9.37348	9.48895	9.41793	9.38787	9.3085	9.43967	9.6174
249	5	89769116	89769508	392	10.686	8.77121	8.87282	9.83172	9.6822	8.81621	8.78391	8.94737	8.83648	8.6624	8.65333	8.67445	8.66051	8.77015	8.76691	8.93383	8.98162	8.80932	8.75645	8.71897	8.86198	8.85383	10.1982	8.72746	8.92643	8.81787	9.82894	9.04225	8.85434	8.63547	8.89863	9.90661	8.76068	8.76387	8.71708	9.01214	8.76341	9.04497	8.58493	8.75218	8.84803	8.61505	8.6926	8.72628	8.9659
250	5	91008627	91008703	76	11.3222	11.1938	11.0686	11.2817	11.2715	11.0332	10.6273	10.8353	10.4983	11.3119	10.6186	10.8256	10.7808	11.2011	10.6613	11.155	11.2912	11.5746	11.4769	11.3362	11.1806	11.1384	11.3175	11.2247	11.194	10.6664	11.448	10.447	11.3715	11.3389	10.706	11.3758	11.487	11.3044	10.7474	11.1297	11.4579	11.2974	11.3782	11.4574	11.4659	11.494	10.5623	10.5942	10.9124
251	5	93157395	93174537	17142	10.8339	10.6294	10.6963	9.83537	9.92552	10.6837	10.6496	10.7158	10.6569	10.6912	10.7745	10.6318	10.7116	10.1847	10.553	10.5727	10.5374	10.7154	10.5594	10.5786	10.6511	10.7066	10.5562	10.6019	10.6122	10.6337	10.4414	10.5005	10.6699	10.1212	10.7482	10.542	10.7157	10.6046	10.6995	10.5598	10.7565	10.6588	10.7825	10.2198	10.6189	10.5658	10.6518	10.6413	10.5208
252	5	94161655	96262456	2100801	9.44675	10.0583	10.3094	10.4315	10.3854	10.4702	10.3654	10.2051	9.99352	10.3642	10.3495	10.3781	10.0761	10.0517	10.0373	10.0433	10.0154	9.39106	9.44735	9.43619	10.3712	10.0772	9.43267	9.40792	10.3562	10.3597	10.3784	10.0097	10.3553	10.3972	10.0501	10.1026	10.0455	9.39473	10.2416	10.055	10.0625	9.37097	10.5498	10.0629	10.1141	10.3866	10.2969	9.97707	9.48914
253	5	105034912	105359320	324408	10.2938	10.3217	10.5952	9.96604	9.91363	10.6444	10.6178	10.3145	10.3184	9.8874	10.6375	10.6409	10.6565	10.292	10.6448	10.2969	10.2841	9.82979	10.6435	10.3286	9.98	10.6189	10.2647	9.8661	9.90568	10.3298	10.2762	10.6035	10.2973	9.82693	10.6323	10.296	9.87481	10.2727	10.6418	10.6362	10.7342	10.6123	10.6203	10.3623	10.3938	10.3638	10.2813	10.6441	10.3309
254	5	105511760	105511768	8	10.9297	10.9621	10.8284	10.995	10.8604	10.8255	10.9479	10.3069	10.3833	10.3563	10.9055	11.0518	11.0434	10.3692	10.9763	10.4842	10.4925	9.09258	11.0341	10.8938	10.8112	11.0147	11.0784	10.3517	10.4707	10.3368	10.88	10.9391	10.3186	9.08426	10.8853	10.3524	10.5674	10.9367	10.8922	11.0365	10.9197	10.9203	10.9355	10.448	10.5696	11.079	10.4191	10.8826	10.2489
255	5	108854265	108854385	120	10.7287	10.7506	10.7226	10.6865	10.6667	10.6771	10.6691	10.6763	10.273	10.6906	10.7704	10.2725	10.7467	10.3215	10.6952	10.2349	10.7271	10.8134	9.31165	10.7791	10.6806	10.7918	10.7704	10.7528	10.7828	10.699	10.7781	10.7021	10.6523	10.6844	10.6703	10.7155	10.9182	10.7992	10.7587	10.7468	10.9238	10.8039	10.6993	10.738	10.9701	10.7541	10.7104	10.3525	10.6878
256	5	109297277	109405615	108338	10.227	10.2514	10.5908	9.91787	9.92028	9.93236	10.1876	10.1856	10.6173	10.1823	10.2228	10.6763	10.1707	10.1334	10.2143	10.2329	9.88174	9.923	10.6365	10.2352	9.9486	10.187	10.2091	9.87	9.82855	9.90696	10.2632	9.8589	10.2022	9.8413	9.90245	9.85492	10.2623	9.9291	10.0461	9.93091	10.2801	9.93241	9.96471	10.3458	10.386	10.4141	10.2176	10.3295	9.97072
257	5	112964873	112965257	384	10.0715	8.84745	10.1551	8.98126	8.87693	8.89018	8.89283	9.0338	10.08	8.84765	8.72362	10.5397	8.76004	8.85311	10.0099	8.93499	8.98861	8.72795	10.509	8.84317	10.0122	10.1122	10.106	8.73012	8.77558	10.109	10.0191	9.10796	8.97554	8.71957	8.90922	10.0239	8.85599	10.0784	9.03782	8.92797	8.76055	8.86298	8.74204	8.84264	10.0511	10.6447	8.74401	10.0457	10.0746
258	5	114023755	114025841	2086	9.69637	10.217	9.68789	10.2503	10.2521	10.2258	10.1512	9.75958	9.70597	10.1991	9.64719	9.63818	9.6369	10.171	10.1295	9.73057	8.69665	10.1475	8.69506	9.68195	9.66669	10.1322	9.62476	9.7336	10.2691	10.2279	8.74442	10.189	9.61887	9.64226	10.1394	10.1595	10.2195	9.63095	10.0934	10.0536	10.0325	10.1059	10.0795	9.68927	10.148	9.64044	10.117	9.68855	9.69533
259	5	116694063	116703656	9593	10.7869	10.6507	10.7709	10.7346	10.6397	10.7113	10.7799	10.4875	10.7302	10.702	10.7714	10.7231	10.8597	10.6188	10.5484	10.6118	10.8311	10.7298	10.7062	10.7969	10.6263	10.6083	10.763	10.5825	10.3606	10.7444	10.6241	10.4669	10.6104	10.7523	10.5935	10.6277	10.551	10.7598	10.2733	10.5987	10.3801	10.6507	10.5275	10.6513	10.3077	10.5984	10.4954	10.4941	10.449
260	5	118388158	118390795	2637	9.34548	9.50058	10.6269	10.4646	10.4661	10.527	9.47016	10.5625	10.9736	10.9732	11.024	11.0136	10.9702	11.0685	9.37867	10.5453	11.0156	10.5067	11.0278	10.5798	10.9551	11.0536	11.0005	11.0463	11.0705	10.5355	11.01	9.49113	10.5221	11.0084	10.9697	10.5474	10.6391	11.1114	10.5704	10.5844	10.665	10.6032	9.36743	11.0019	11.1031	10.9995	10.5922	11.076	9.57394
261	5	139004112	139005838	1726	10.959	10.5489	10.5575	10.9683	10.6111	10.5817	9.83654	10.6886	9.95892	10.6263	10.893	9.84286	9.83249	10.5097	10.5363	10.567	9.86857	9.88828	10.5714	10.5134	10.5918	9.97654	9.87836	10.6001	9.91722	10.5799	9.85316	10.5148	10.4947	9.8165	10.5969	10.7053	10.5725	9.87857	9.90031	10.4944	9.84092	10.4926	10.5668	10.8698	10.5259	10.0282	10.6052	10.4651	10.0643
262	5	147753247	147754272	1025	10.5121	10.5345	10.5967	10.273	10.3071	10.3434	10.315	10.5623	9.46391	9.47001	10.324	10.1691	10.4894	9.99351	10.5508	10.3661	10.0361	10.4303	10.5542	10.1326	10.2462	10.2891	10.1168	10.3682	10.3823	10.4904	10.376	10.4712	10.5165	10.0141	10.4257	10.6056	10.3013	10.2053	10.4085	10.4441	9.8743	10.3084	10.4454	10.2141	10.0648	9.85806	10.1034	10.305	10.1124
263	5	148493203	148495504	2301	10.7377	9.91437	10.224	10.606	10.613	10.6261	10.2237	10.1808	10.23	10.122	10.6852	10.2912	10.2459	10.6661	10.2075	10.1984	10.2386	10.2522	11.0156	10.207	10.6229	10.2256	10.2502	10.7835	10.2334	10.1909	10.1809	10.1622	10.1172	10.653	10.6038	10.2229	10.2904	10.2897	10.5022	10.8593	10.1815	10.6023	9.9212	10.1514	10.1703	10.1668	10.2721	10.1981	10.1888
264	6	7932634	7938483	5849	9.78003	10.4415	9.83992	9.791	9.80618	9.83609	10.9773	10.5142	9.82254	9.79195	9.64837	10.5558	9.74618	10.5521	9.73478	10.5895	9.837	11.1012	9.80088	10.5281	9.79099	10.547	9.79088	9.72041	10.5073	9.75419	9.67903	10.5538	9.8761	10.6292	10.6055	9.75587	10.6849	9.65093	9.81616	9.71152	10.6639	9.73362	9.7585	9.75332	9.83958	11.0509	9.71232	11.0299	9.82231
265	6	8041854	8049012	7158	9.53265	9.92187	9.62428	9.54865	9.56639	9.62907	10.2149	10.151	9.65565	9.53573	9.39625	9.78152	9.33573	9.87055	9.46588	9.89243	9.40081	10.076	9.45651	9.87666	9.58534	9.86049	9.31785	9.42283	9.86368	9.56344	9.42957	9.96276	9.54342	9.88122	9.98793	9.46111	9.91686	9.44506	9.56515	9.50236	9.92182	9.49748	9.47169	9.57765	9.50084	10.22	9.44858	10.2359	9.77707
266	6	15857424	15864027	6603	9.79881	10.5261	9.80095	9.86316	9.92646	9.85948	10.3972	9.78413	9.77345	9.88697	10.5805	10.5738	9.97342	10.437	9.80029	10.3911	10.0009	10.5854	10.0179	10.0694	10.3914	9.86764	9.98755	10.4421	10.4633	10.4691	9.99488	9.94323	9.93761	10.5812	9.87488	9.96473	9.86682	9.85968	9.95878	9.82596	10.5622	9.8403	10.1029	10.5862	10.1358	10.0825	9.95308	10.4535	9.63237
267	6	23304438	23304526	88	10.2153	10.1011	10.1014	10.7977	10.844	8.4659	10.9314	10.0053	10.8928	10.0416	10.0771	10.9779	8.3799	10.1184	10.0968	10.9982	8.60472	10.1797	8.42819	10.0973	10.0456	10.1242	10.271	10.1566	10.8562	10.1193	10.1468	10.1591	8.6707	10.9617	10.0465	8.49024	10.7084	10.1749	10.2921	8.52516	10.9739	9.85719	9.88481	10.2059	11.0077	10.977	10.892	10.9157	8.82384
268	6	24062606	24063639	1033	10.2271	9.1693	9.09432	10.2607	10.2531	9.14769	10.2069	10.1378	10.2399	10.229	10.3423	10.4032	9.1545	9.09618	10.2453	10.2629	9.07844	10.4265	9.1174	10.9248	9.11703	9.07862	9.16686	9.11899	10.2836	10.2888	9.14014	9.00912	9.1024	10.2547	9.07558	9.15275	10.4741	10.4498	9.26817	9.18989	11.0312	9.18699	10.4063	10.4522	10.3999	9.23295	10.3343	9.27684	10.8577
269	6	33119386	33120432	1046	10.1587	10.0994	9.93761	9.96959	10.5905	10.6441	9.94606	9.93892	10.5908	9.8193	10.0753	10.173	9.98765	10.0119	10.5371	8.89104	10.6282	10.815	10.7758	8.97399	10.6218	10.6784	10.8161	10.8279	10.174	10.7342	10.1561	9.99317	10.5442	10.0843	8.83822	10.679	10.1126	10.2197	10.0642	10.6938	9.9104	10.6219	10.754	10.6852	10.5411	10.1233	10.1501	10.2477	10.1216
270	6	34205393	34221475	16082	9.47097	9.46254	9.44426	9.44641	9.46716	9.85872	9.42855	8.92368	9.78008	9.40808	9.4771	9.45365	9.4772	9.45024	9.85828	8.86463	9.87074	9.85102	9.87095	9.50958	9.83834	9.90953	9.52329	9.87671	9.40635	9.49428	9.48427	8.84762	9.97228	9.45239	8.92047	9.96572	9.57469	9.46432	9.43852	9.91156	9.51725	9.99166	9.91982	9.99733	9.96033	9.42718	8.93838	9.41683	9.90246
271	6	41994493	42018238	23745	9.80207	8.73694	10.342	10.4795	10.4554	9.7655	9.75551	10.3081	10.3261	10.3756	10.4786	10.3934	10.3854	10.3511	10.4052	10.301	10.3423	9.70735	9.68397	10.4192	10.429	10.4361	10.3552	9.74981	10.3521	9.8438	10.4309	9.78428	10.3912	10.45	10.3987	10.3871	9.73974	10.4034	10.5008	9.90688	10.0172	10.3985	9.79363	10.5341	10.6859	10.6381	10.4222	10.5039	10.4207
272	6	45499299	45520306	21007	9.7716	10.135	9.75096	10.0683	10.1221	10.4217	10.0389	10.0275	9.99539	10.0593	9.71646	9.70438	9.71311	9.6986	10.0641	9.69319	9.69593	10.1202	10.0127	9.74908	10.0654	9.98346	10.0459	9.74522	10.0473	10.0964	9.74642	9.73001	9.70251	10.0894	9.744	10.0798	10.0947	10.0777	9.73214	10.4424	10.2612	10.0072	9.76267	10.1763	10.7284	10.2105	10.0248	10.0794	9.96595
273	6	67402363	67416752	14389	9.58178	10.4772	10.0702	10.3792	10.3545	10.0654	9.59805	10.4076	10.0986	9.47926	10.0081	10.52	10.0784	10.485	10.1051	10.4889	10.1429	10.0583	10.1036	10.4328	10.0908	10.0788	10.4847	10.091	9.5617	10.3698	9.32002	9.38012	10.4508	9.99582	10.4517	10.0072	10.3458	10.0535	10.4258	10.0856	10.4081	10.3999	10.0081	10.4008	10.0202	10.4678	10.0561	10.3907	10.0441
274	6	67506071	67662275	156204	9.44139	10.4423	10.2812	10.427	10.4223	10.0916	9.53472	10.3628	10.2016	9.69526	10.204	10.3773	10.1694	10.487	10.2299	10.3935	10.0029	9.94195	10.0816	10.3843	10.0324	10.2193	10.3846	10.2129	9.719	10.4293	9.89766	9.92479	10.3903	10.1544	10.4588	10.2201	10.3338	10.21	10.418	10.0796	10.3753	10.367	10.1828	10.4201	9.99417	10.4284	10.2044	10.4618	10.3424
275	6	67876359	68253141	376782	10.4626	10.5311	10.1978	10.5236	10.496	10.2515	9.96842	10.3911	10.1811	10.1922	10.2238	10.5488	10.2192	10.2564	10.2248	10.4762	10.4886	10.5015	10.2622	10.5234	10.4862	10.2345	10.4981	10.2348	10.2477	10.4786	10.0163	10.0304	10.4974	10.2076	10.236	10.2194	10.4599	10.1708	10.4685	10.2268	10.5289	10.4346	10.2184	10.5058	10.5443	10.5303	10.1817	10.4705	10.1752
276	6	68387772	68420548	32776	10.2993	10.457	10.0752	10.4163	10.4079	10.128	10.0162	10.2103	10.0797	10.108	10.1167	10.4513	10.1745	10.1366	10.1091	10.4046	10.3892	10.4829	10.1995	10.4094	10.3474	10.1328	10.3593	10.0694	10.1108	10.3512	10.256	10.3351	10.4289	10.1177	10.1068	10.0531	10.307	9.95133	10.3418	10.0366	10.593	10.2811	10.0452	10.5246	10.6644	10.5168	9.95604	10.2383	9.93806
277	6	68535332	68785029	249697	10.3623	10.5476	10.2462	10.5672	10.5512	10.3052	10.0151	10.4661	10.2091	10.2249	10.2361	10.5942	10.2744	10.3189	10.2631	10.5264	10.5606	10.3903	10.3325	10.5762	10.5518	10.2718	10.5888	10.2527	10.242	10.5523	9.85159	9.90608	10.5495	10.2427	10.3089	10.2581	10.5085	10.2716	10.5729	10.3657	10.624	10.5674	10.2919	10.6059	10.6204	10.6286	10.2573	10.3391	10.2059
278	6	68860428	68900983	40555	10.4865	10.4612	10.0641	10.466	10.4776	10.3851	10.1076	10.3668	10.013	10.1231	10.148	10.5003	10.1299	10.3275	10.1299	10.3974	10.4353	10.4459	10.3752	10.5064	10.4118	10.1015	10.4938	10.1859	10.1792	10.4754	9.61889	9.69512	10.4126	10.1182	10.3453	10.1608	10.5089	10.1187	10.4971	10.2858	10.5289	10.3835	10.1903	10.4441	10.5984	10.5788	10.0998	10.3914	10.0963
279	6	69017899	69193441	175542	10.5411	10.5606	10.3098	10.5871	10.6601	10.2772	9.95844	10.5088	10.3025	10.2976	10.2899	10.5369	10.3565	10.2731	10.2604	10.5437	10.528	10.5432	10.2986	10.5256	10.5569	10.3383	10.5081	10.247	10.2963	10.566	9.97665	10.038	10.5963	10.3219	10.2755	10.3085	10.334	10.1172	10.438	10.2108	10.4933	10.465	10.2405	10.5989	10.5704	10.5425	10.1948	10.191	10.2414
280	6	69452717	69650773	198056	10.7281	10.7773	10.4294	10.7841	10.7951	10.4479	9.92337	10.6486	10.3671	10.4155	10.4173	10.6971	10.4257	10.4093	10.4095	10.7277	10.7226	10.7285	10.4631	10.7416	10.7396	10.4431	10.7113	10.4304	10.4464	10.7287	10.0983	10.1391	10.7219	10.4026	10.4235	10.4228	10.5675	10.3014	10.6748	10.424	10.7749	10.6996	10.4281	10.8306	10.8867	10.8117	10.3659	10.401	10.4148
281	6	70210441	70265090	54649	10.2414	10.3437	10.1268	10.2996	10.2965	9.9365	9.49743	10.1189	10.1117	10.144	10.273	10.3083	10.1821	9.97603	10.1844	10.2185	10.2047	10.2519	9.98613	10.332	10.2647	10.1996	10.3137	10.2725	10.309	10.2542	10.2232	10.0723	10.2199	10.1601	9.89147	10.1922	10.3746	10.1345	10.1843	9.89695	10.3007	10.2041	10.2497	10.2387	10.3041	10.3261	10.1974	9.97882	10.075
282	6	70355698	70356974	1276	9.7503	9.80674	9.34111	9.80285	9.81725	9.31437	8.7447	9.55775	9.41989	9.49382	9.50686	9.81949	9.38195	9.33369	9.40486	9.54594	9.66781	9.794	9.27372	9.792	9.68357	9.40937	9.70064	9.50645	9.49589	9.68584	8.87539	9.02678	9.68391	9.45164	9.25082	9.394	10.0283	9.58622	9.87468	9.33704	10.0777	9.76025	9.73193	9.82664	10.021	9.94526	9.61841	9.50718	9.50088
283	6	70471117	70538758	67641	10.6462	10.7626	10.3081	10.7068	10.6952	10.5474	10.4794	10.619	10.3102	10.2627	10.2962	10.7507	10.2546	10.5583	10.2368	10.7811	10.635	10.5102	10.6189	10.7177	10.675	10.3357	10.6882	10.2257	10.3223	10.7255	9.80086	9.91113	10.6574	10.1758	10.5643	10.2789	10.5177	10.3608	10.714	10.5323	10.5592	10.7107	10.3393	10.7914	10.5423	10.7981	10.3958	10.6609	10.3463
284	6	70686052	70700249	14197	10.4601	10.9436	10.4098	10.8851	10.8036	10.175	9.41061	10.5898	10.3521	10.4014	10.4515	10.9538	10.5217	10.2157	10.5043	10.7448	10.8411	10.5369	10.4167	10.9086	10.7394	10.45	10.8797	10.4931	10.4496	10.8238	10.7554	10.602	10.8709	10.3758	10.1772	10.454	10.5986	10.5075	10.9552	10.3183	11.0993	10.8128	10.541	11.0421	10.6296	11.0398	10.5766	10.299	10.384
285	6	74552424	74645435	93011	10.3247	10.3409	9.91628	10.3229	10.3212	10.2968	9.9134	10.2326	10.2656	9.93538	9.90816	10.3671	10.4066	10.3434	9.93724	10.3628	10.3849	10.3691	10.3356	10.3188	10.3338	9.97277	10.3842	9.90607	9.93516	10.2999	10.3144	9.96832	10.3627	9.96689	10.3031	9.95567	10.2934	9.85845	10.2946	10.3281	10.4559	10.2468	9.90888	10.4161	10.4692	10.418	9.87607	10.2704	9.85429
286	6	74899205	74998745	99540	10.829	10.8518	10.2925	10.869	10.8122	10.7654	10.261	10.3856	10.7414	10.3001	10.306	10.8221	10.8876	10.8233	10.3277	10.8643	10.7967	10.8939	10.8278	10.8206	10.8311	10.3523	10.8307	10.3232	10.3881	10.906	10.8618	10.3772	10.8279	10.3158	10.8299	10.2504	10.4701	9.87425	10.6705	10.6917	10.1549	10.7249	10.2943	10.7335	10.5843	10.724	10.3073	10.7507	10.2442
287	6	75304536	75338698	34162	10.1151	10.1978	9.97486	10.26	10.115	10.0738	9.8977	9.91176	10.2155	9.95267	9.93555	10.2302	10.3233	10.2972	9.90753	10.2951	10.2771	10.2764	10.1193	10.1203	10.2613	9.97875	10.1145	9.93139	9.95821	10.2044	10.2033	9.94668	10.2593	9.97326	10.2202	9.90399	10.0356	10.0996	10.2441	10.1432	9.94049	10.1476	9.94684	10.2499	10.4086	10.2022	9.84792	10.219	9.84638
288	6	75345457	75345955	498	10.0156	10.1779	10.074	10.259	10.1494	10.0781	10.141	10.0708	10.0421	10.1959	10.0508	10.3958	10.2289	10.1694	10.0193	10.1532	10.1263	10.3308	9.91401	10.0508	10.1873	10.1106	10.0187	10.1325	10.2102	10.159	10.174	10.0744	10.1807	10.0777	10.1547	10.0014	8.94094	10.0601	9.71407	9.68512	9.40099	9.86627	10.1875	9.97657	9.79302	9.77764	9.90526	9.81409	9.78169
289	6	75438396	75448628	10232	10.0279	10.0587	10.3001	9.57007	9.98498	10.0059	10.0361	10.055	9.51988	9.98548	10.3002	10.3125	9.58281	9.56315	10.0883	9.56432	9.57833	9.47081	9.88726	9.92322	9.59367	10.4078	9.97106	10.0458	10.1794	9.4781	9.42898	10.1052	9.61267	10.3116	9.53698	10.3045	9.80176	10.6615	9.40104	9.87232	9.98213	9.49138	10.2467	10.3102	9.56339	9.86487	10.2589	9.35883	10.1097
290	6	75938517	76017583	79066	10.2533	10.2688	10.036	10.4524	10.3287	10.2712	10.0457	10.0706	10.3717	10.0785	9.95969	10.3609	10.4661	10.3975	10.0962	10.4082	10.3733	10.4382	10.2955	10.3519	10.4357	9.98877	10.2871	10.0107	10.0667	10.4057	10.3866	10.0825	10.4274	10.0008	10.3914	9.96454	10.2104	9.95999	10.4922	10.3183	10.2195	10.4291	9.97453	10.4451	10.612	10.4145	9.92466	10.4427	9.9463
291	6	79445527	79447101	1574	9.95803	10.1361	9.60131	9.93754	9.46113	10.0779	10.0005	10.1117	9.00058	10.0422	10.0533	9.45395	9.88948	9.94638	10.0235	10.1083	9.48874	9.83455	10.03	10.0652	9.96376	10.0918	9.89451	10.0303	10.1358	9.42364	9.90377	10.0152	10.1484	10.0584	9.85556	9.94724	9.682	10.0588	9.94184	9.99034	9.91082	9.91238	10.0107	9.77577	9.38329	8.61763	9.89396	9.45655	10.037
292	6	82601443	82602661	1218	10.6324	10.4861	10.5478	10.5458	10.5291	10.5634	10.5051	10.5897	10.4947	10.5652	10.5106	10.5882	11.358	10.508	11.3178	10.6054	10.4894	11.4153	10.5661	10.6684	10.5518	10.5536	10.5117	10.5175	10.5066	11.3092	10.97	10.5332	10.5063	10.4536	11.3374	10.561	10.4999	10.4782	11.001	10.5389	10.484	10.5612	10.4772	10.4932	10.5883	10.6296	10.5168	11.4303	10.8008
293	6	93784886	93785383	497	11.3548	9.31692	11.4197	11.4358	10.6988	10.8126	11.4056	9.65008	11.2338	11.3394	10.8143	11.3715	11.3817	10.7483	11.4061	9.40604	10.7762	11.4401	11.3042	10.7348	11.3611	10.7768	9.34365	10.8459	11.4132	10.7771	10.9043	10.7026	10.7992	11.3259	10.7966	11.3534	11.3501	11.3223	10.6718	10.7107	10.74	10.7193	9.23249	11.2931	11.3053	10.7475	11.2532	10.7135	11.1233
294	6	97429680	97475425	45745	10.4623	10.4077	10.44	10.3662	10.3673	10.4333	10.473	10.4975	10.4099	10.4413	9.97073	9.90159	9.96855	10.0041	10.4438	10.435	10.4035	9.92333	10.4585	10.4365	10.408	10.4083	10.4413	10.4441	10.4572	10.4415	10.4443	10.0272	10.3565	10.4282	10.0497	10.4427	9.75563	10.4311	10.1518	10.2086	9.82735	10.2733	10.3738	9.8379	9.65467	9.83442	10.4377	10.2685	10.4064
295	6	98496702	98523715	27013	9.84836	9.97753	9.87194	10.0257	9.63724	9.92247	9.93837	9.86302	9.58787	9.84175	9.95084	9.68174	9.04842	9.5852	9.86385	9.65688	9.8634	9.61729	9.89986	9.98736	9.94724	9.58174	9.91157	9.9293	9.65742	9.89085	9.69297	9.61953	9.95095	9.59661	9.57335	9.91787	9.86408	9.91454	10.0793	9.98961	10.1755	9.97243	10.1602	10.0095	9.87961	9.81302	10.0497	10.1168	10.097
296	6	101279285	101286899	7614	8.90659	8.85752	9.81335	8.87573	8.86059	8.86435	8.96724	9.88611	8.94575	8.88468	8.73604	8.75775	8.74579	8.78765	8.83847	8.88419	9.62948	8.75306	8.82829	8.75223	8.88629	8.93605	8.84559	9.67731	9.60637	9.64702	8.80568	9.72235	8.93845	8.78196	8.91612	9.60686	8.70931	9.67041	8.93974	8.91548	9.53434	8.96212	8.73022	8.80513	9.4978	8.86769	9.59559	8.86606	9.20519
297	6	102304927	102326421	21494	9.73977	10.4072	10.2876	10.515	9.71683	9.66035	10.3728	10.2578	9.69604	9.72698	9.6372	9.70757	9.66144	9.76839	9.70598	9.78334	10.3937	9.62808	10.3831	9.71322	9.71042	9.78012	9.75238	10.386	10.4488	10.4009	9.70722	10.4978	9.7695	10.3452	9.68449	10.3897	9.66304	10.2639	9.87224	9.8057	10.4286	10.5442	10.473	9.7439	10.6319	9.81113	10.9395	9.7903	9.80397
298	6	103383705	103460909	77204	10.0775	10.476	10.0277	10.5547	9.6199	10.0408	10.4622	10.3846	10.0134	10.4533	10.5406	10.5143	10.5593	10.0666	10.4761	10.0318	10.0598	10.5856	10.3867	10.5528	10.0515	10.5114	9.55919	10.4674	10.5298	10.4537	10.0305	10.4178	10.497	10.4789	10.0239	10.4539	10.3453	10.3842	10.0349	9.99733	10.4027	10.3961	10.1917	10.4911	10.455	10.1275	10.442	10.4516	10.4316
299	6	104527703	104528363	660	10.7897	11.1479	11.0106	10.7689	10.7844	10.7785	11.3921	10.9485	10.7006	11.4333	11.5804	9.30975	10.9288	11.536	11.5123	10.8573	9.20436	11.6201	11.0779	10.9072	10.7731	11.4095	9.18305	10.8881	10.848	10.7642	10.7173	10.8021	10.7738	11.5079	11.3998	9.05258	8.90013	11.4854	10.5429	10.767	10.7447	10.8807	10.6951	10.6668	10.6337	9.14793	11.0612	11.5282	10.5401
300	6	106983886	107033569	49683	10.0891	10.0835	10.4524	10.1114	10.0937	10.1387	10.1621	10.1172	10.1161	9.7879	9.74838	10.4526	10.1586	9.75398	9.77336	10.1325	10.4998	9.73932	10.144	10.112	10.144	9.84748	10.4964	10.0931	10.1334	10.0929	10.4202	10.1302	10.0896	9.78354	9.77015	10.4188	10.4877	9.72683	10.1447	10.1946	10.604	10.1359	10.4546	10.1602	10.5532	10.4478	10.3884	10.0862	10.1382
301	6	107044360	107080793	36433	9.61669	9.81138	9.88429	9.75578	9.6589	9.62416	9.67007	9.86782	9.68356	9.2289	9.14279	9.81037	9.66328	9.21171	9.24827	9.60698	9.83359	9.15551	9.8173	9.7184	9.68365	9.34604	9.91539	9.73462	9.84337	9.67438	9.92123	9.74156	9.92423	9.13011	9.30753	9.87862	9.55423	9.14611	9.46775	9.49748	9.66983	9.80564	9.80156	9.55394	9.70135	9.74228	9.80266	9.46163	9.62444
302	6	107165345	107215744	50399	10.4684	10.4733	10.744	10.4713	10.5113	10.5214	10.4552	10.4721	10.4182	10.1482	10.0911	10.8698	10.483	10.1477	10.1489	10.5424	10.7939	10.1249	10.465	10.4652	10.4848	10.201	10.7778	10.4533	10.5113	10.4765	10.7737	10.4963	10.4677	10.123	10.1621	10.8248	10.7612	10.1158	10.4377	10.4523	10.8436	10.4554	10.8241	10.5079	10.852	10.9045	10.8945	10.5101	10.4815
303	6	110118673	110222644	103971	10.5712	10.2172	10.5703	10.2974	10.2659	10.3917	10.2091	10.1844	10.1838	10.272	10.3489	10.3038	10.2679	10.3838	10.2859	10.5814	10.3823	10.3313	10.2298	10.4099	10.3873	10.2831	10.2993	10.2594	10.4208	10.2418	10.2016	10.3612	10.3917	10.2444	10.347	10.2824	10.2105	10.3227	10.5453	10.2909	10.3187	10.3886	10.6875	10.3293	10.3555	10.3482	10.2097	10.2235	10.2202
304	6	116198049	116199740	1691	8.99065	10.9802	10.5863	10.7277	10.6646	9.14794	9.2606	10.5541	9.22963	10.7671	10.7983	10.8615	10.9129	11.2694	10.8029	10.838	9.26091	10.7371	11.0761	11.1365	9.18018	10.7674	10.8329	9.11424	10.6477	10.6537	10.649	10.7365	11.268	10.744	11.1653	10.7144	8.99399	10.7198	8.95316	9.0897	10.5662	10.6221	9.07733	10.9967	10.5967	8.98766	11.243	11.0551	10.5215
305	6	126749487	126750695	1208	9.15299	9.20686	9.7042	9.74243	9.07793	9.12994	9.66145	9.61891	9.0647	9.08365	9.10817	9.26079	9.07381	9.10291	9.58235	9.17141	9.20788	9.19295	9.24486	9.18873	9.6136	9.12042	9.2012	9.19649	10.2579	9.83255	9.18959	9.60102	9.11606	9.1895	9.03497	9.74873	9.28008	9.299	9.28864	9.26244	9.15964	9.21326	9.15087	9.20226	9.73477	9.69773	10.1793	9.27139	9.36631
306	6	128202481	128204309	1828	10.4335	10.4092	10.2256	10.5205	9.49397	9.95298	10.1953	10.4522	10.6075	10.2363	10.5743	10.5223	10.1772	10.1098	10.5415	10.507	10.5691	10.1705	10.6326	10.2094	10.1546	10.1915	10.5559	10.4692	9.26455	10.5362	10.2289	10.4627	10.5246	10.5673	10.2082	10.5594	10.7194	10.6417	10.578	10.6457	10.3411	10.6057	10.1432	10.6646	10.243	10.4852	10.6808	10.5892	10.5956
307	6	128595431	128596253	822	10.9116	10.7791	10.2789	10.918	8.95749	10.2063	10.2178	10.6337	10.8527	10.9231	10.8898	10.8919	10.9045	10.9604	10.8899	10.7938	10.9167	10.9748	10.897	10.9395	10.2985	10.844	10.944	10.8869	8.89958	10.9283	10.9635	10.8001	10.7791	10.9463	10.7698	10.9251	11.1194	10.9051	10.9216	10.8163	10.8659	10.9355	10.9499	10.946	10.8858	10.9468	10.7765	10.8556	10.6311
308	6	128729176	128769001	39825	10.4219	10.4341	10.3965	10.4188	10.3376	10.2723	10.4419	10.3509	10.408	10.4055	10.4033	10.4386	10.4481	10.4484	10.44	10.4296	10.4276	10.4397	10.4413	10.4478	10.4896	10.4376	10.4877	10.4318	10.315	10.4228	10.4257	10.4437	10.4415	10.4254	10.4091	10.4238	10.3493	10.3899	10.3646	10.3845	10.3494	10.3619	10.422	10.4106	10.3203	10.3737	10.3848	10.3618	10.367
309	6	130065363	130316515	251152	9.88084	9.89929	9.88175	10.4935	9.90095	9.90369	9.81583	9.87708	9.83216	10.4155	10.4601	9.86562	10.4821	10.6782	9.85234	9.90774	9.87873	10.4737	9.87897	10.4857	9.9373	10.4637	9.8703	9.86996	9.8981	9.89659	10.5016	9.88336	9.8631	9.82582	10.6547	9.86994	9.80273	9.77464	9.82446	9.84539	10.4547	9.83728	10.4991	9.90078	9.92743	9.92425	9.80176	9.83841	9.86776
310	6	130707413	130787067	79654	11.2703	11.2571	11.2087	10.9316	11.3196	11.2228	11.2267	11.0795	11.1187	10.8431	10.9118	11.2383	10.881	10.5248	11.212	11.1986	11.1685	10.9073	11.1838	10.8966	11.1975	10.905	11.2487	11.2649	11.3266	11.1856	10.8935	11.1687	11.2098	11.222	10.4824	11.2445	11.0584	11.1425	11.1514	11.1071	10.7793	11.1683	10.8726	11.2232	11.2581	11.2679	11.196	11.2017	10.9876
311	6	137984036	137984036	0	11.5453	11.6996	11.6506	11.6916	10.9531	11.6193	11.71	11.579	11.5024	11.8014	11.8383	11.8313	7.53816	11.669	11.7728	10.762	11.5108	11.8334	11.7707	11.1645	11.6853	11.7927	11.6815	10.978	11.5893	11.8512	11.864	11.6117	11.82	11.7761	11.0608	11.7667	11.753	11.1131	11.6449	11.4778	11.7584	11.7382	11.743	11.743	11.8326	11.7506	11.7238	11.7316	11.3788
312	6	138231553	138237439	5886	10.9013	10.8519	10.9065	10.8691	10.3752	10.8366	10.9665	10.8457	10.9133	10.8966	10.8358	10.9149	10.4138	10.8897	10.9851	10.4926	11.0192	10.9883	10.9469	10.4122	10.8989	10.8863	10.9768	10.8997	10.7737	10.8774	10.8672	10.8732	10.8991	10.9099	10.4337	10.9132	10.9689	10.5234	11.0685	11.027	11.0936	11.0819	10.9424	11.0223	11.0034	11.0338	10.9572	10.9865	11.0021
313	6	138345026	138345242	216	10.7905	11.1158	10.8099	10.9544	10.2969	10.8634	10.7266	10.6908	10.7378	10.8017	10.9215	10.8546	10.2036	10.966	10.8784	10.2277	10.7554	10.9501	10.8413	10.2661	10.8043	10.8669	10.9087	10.985	11.0778	10.833	11.0418	10.6519	10.7314	10.825	10.1326	10.8846	11.2235	10.1888	10.8953	10.8973	11.2987	10.9634	11.0014	10.9198	11.3461	11.0353	10.8468	10.8836	10.7035
314	6	139364857	139412174	47317	10.7174	10.202	10.5505	10.0318	10.14	10.6067	10.2071	10.1904	10.1316	10.6534	10.1884	10.0159	10.2429	10.6864	10.1992	10.1961	10.1874	10.2073	10.1653	10.0312	10.1726	10.2029	10.7447	10.2094	10.1834	9.96203	10.1646	10.2102	10.148	10.1898	10.1529	10.6613	10.1628	10.2182	10.2017	10.2336	10.2694	10.2136	10.2352	10.2486	10.712	10.2574	10.246	10.1629	10.1948
315	6	139788838	139789925	1087	10.0386	10.3492	10.5864	10.7041	10.2589	10.1526	10.3115	10.4194	10.253	10.3873	10.2905	10.7196	10.3497	10.0396	10.3368	10.3922	10.3678	10.2969	10.3509	10.6606	10.3455	10.3484	10.0689	10.4136	10.4264	10.6552	10.312	10.367	10.2928	10.3188	10.2398	10.0074	9.59776	10.2314	9.81473	10.0029	9.4756	10.1099	10.2607	9.81126	9.29164	9.72658	10.3049	9.95155	10.1676
316	6	139864605	139882163	17558	10.464	10.5013	10.6508	10.9942	10.714	10.4543	10.8138	10.5795	10.7142	10.5456	10.678	11.0741	10.8767	10.5359	10.6592	10.6456	10.6745	10.6147	10.7087	11.0187	10.8031	10.6007	10.7634	10.7101	10.7283	10.9279	10.6457	10.7613	10.6182	10.7697	10.6908	10.5185	10.7198	10.6111	10.5724	10.5805	10.6434	10.6933	10.5798	10.8202	10.5598	10.7821	10.7161	10.6901	10.5599
317	6	139939182	139950758	11576	10.0321	10.3512	10.2804	10.0373	10.017	10.2052	9.51565	9.9419	9.93084	10.2476	9.97027	10.3634	9.46158	10.3582	10.0291	10.0364	10.3667	10.0229	10.0047	9.53295	9.99645	9.97312	10.3849	10.0287	10.0124	9.53138	10.0329	10.2856	9.97994	9.95066	9.98772	10.3504	10.0417	10.0527	10.0717	10.0722	10.1486	10.0326	10.0447	10.0735	10.4744	10.4241	10.3344	10.0442	9.93846
318	6	140731823	140757346	25523	10.2095	9.73727	9.65968	10.1322	10.131	9.90548	10.543	10.2844	10.2296	9.84219	10.1908	9.45603	10.474	9.74722	10.2533	10.1985	9.76717	10.1368	10.1887	10.6267	10.2023	10.3035	9.52452	10.2268	10.1565	10.528	10.1675	9.71667	10.2765	10.2384	10.2635	9.81251	10.2465	10.1549	10.2662	10.2608	10.2866	10.1774	10.145	10.2275	9.76041	9.55621	9.4516	10.1351	10.2776
319	6	142719701	142721973	2272	10.3786	10.3525	9.93572	10.2669	10.259	9.95317	10.312	9.97992	10.5129	10.0552	9.99251	10.6389	10.6398	10.0726	9.98043	10.3536	10.3979	9.88063	10.2996	10.6404	9.96958	10.0065	10.0743	10.7089	10.3525	9.97075	10.2234	10.2331	10.0239	10.2324	10.3088	9.93739	9.96266	9.96507	9.5466	9.96858	9.90247	10.0845	9.90523	9.85343	9.41505	9.88377	10.3156	9.96204	9.65857
320	6	142768112	142806140	38028	10.2871	10.3071	9.98789	10.3414	9.92588	10.3013	10.6215	10.0463	10.6088	9.94552	9.89255	10.3174	10.6512	9.96899	9.94202	10.3365	10.3345	9.86827	10.3253	10.3067	9.97134	10.0004	9.94791	10.6357	10.391	9.93499	9.92245	10.6375	9.95723	10.3323	10.3472	9.8779	9.69382	9.82207	9.71073	10.1494	10.1062	9.82337	9.82405	9.81459	9.67004	10.4778	10.2767	10.186	9.86899
321	6	143197769	143206183	8414	11.0729	11.0008	10.3219	10.7505	10.2718	10.7016	11.003	10.405	10.9871	10.3717	10.6646	10.8088	10.7043	10.2162	10.8125	10.6651	11.0166	10.2658	10.8067	10.2092	10.3111	10.7159	10.2733	11.0749	10.7591	10.828	10.3861	10.9486	10.2849	10.2816	10.3269	10.7977	10.3315	10.4226	10.7114	10.7071	10.6428	10.3897	10.7293	10.3269	10.3619	10.9617	10.7584	10.7293	10.2862
322	6	143508240	143525815	17575	10.4357	10.0409	9.55478	9.44815	9.44626	9.64371	10.4074	9.53672	9.96265	9.64772	9.58754	9.94516	10.0242	9.43861	9.9457	10.0557	9.98261	9.41035	9.4575	9.44021	9.48042	9.66897	9.41692	10.5096	10.1093	9.48762	9.37756	10.052	9.86937	9.44958	9.47536	10.0643	9.49903	9.84083	9.85983	9.45695	9.4148	9.42451	9.91873	9.69129	9.7383	10.0002	10.0086	9.70331	9.92692
323	6	143640052	143657471	17419	10.8782	10.4382	10.7364	10.3785	10.7151	10.4085	10.82	10.7665	10.7053	10.7181	10.3661	10.5945	10.6408	10.7212	10.681	10.6374	10.337	10.7094	10.5745	10.7194	10.6148	10.3043	10.7166	10.928	10.7566	10.3923	10.8235	10.4147	10.7742	10.5989	10.6175	10.7332	10.7726	10.9515	10.6888	10.6006	10.7582	10.7746	10.7427	10.8452	10.8881	10.4683	10.7478	10.8917	10.7599
324	6	145108944	145120036	11092	9.4407	9.39187	9.33606	9.42242	9.42146	9.41722	9.36649	9.28453	9.30759	9.76953	9.84776	9.42475	9.62666	9.83051	9.36119	9.57921	9.4086	9.418	9.45068	9.68081	9.42655	9.34522	9.83	9.42796	9.85449	9.42692	9.83163	9.31537	9.58673	9.58532	9.89007	9.82691	10.1449	9.83411	9.43475	9.34176	10.0641	9.75479	9.43805	9.5776	9.82124	9.40427	9.33834	9.47041	9.74819
325	6	145308959	145315910	6951	8.9701	8.83671	9.08075	8.95543	8.97223	8.98002	8.99896	9.18009	9.02124	10.0758	10.186	8.71605	8.7601	10.1276	8.89122	8.89964	8.85303	8.82644	8.99899	8.84546	8.95776	8.93665	10.0825	8.89219	10.0953	8.95122	10.2294	8.88408	8.91573	8.84948	10.1849	10.1957	10.7399	10.2308	8.88226	9.00658	9.98947	10.0833	8.84705	8.85197	9.9642	8.89439	8.78277	9.18221	10.0386
326	7	5363956	5499501	135545	10.2778	10.3347	10.3175	10.2593	10.3764	10.2108	10.3086	10.2534	10.269	10.3374	10.3597	10.3966	10.2968	10.261	10.241	10.3028	10.3501	10.3879	10.2895	10.2645	10.3442	10.3594	10.3594	10.3186	10.3674	10.2847	10.3326	10.2942	10.2573	10.3394	10.3968	10.3682	10.5103	10.3459	10.4136	10.4219	10.4931	10.3978	10.4765	10.5255	11.0511	10.4543	10.3713	10.3329	10.3016
327	7	6274816	6275328	512	10.2001	10.1852	10.6992	10.2728	10.7707	10.2192	10.2645	10.6291	10.6664	10.2233	10.7341	10.2004	10.1861	10.1561	10.222	10.2676	10.3042	10.7544	10.222	10.2294	10.7108	10.2515	10.7443	10.796	10.7128	10.197	10.2364	9.14534	10.2794	10.266	10.2541	10.7548	9.20432	10.1255	10.6214	10.6305	10.1832	10.6216	10.0504	10.611	10.5857	10.1686	10.0703	10.1882	10.5994
328	7	9155987	10622466	1466479	10.6461	11.128	10.6467	11.1199	10.7112	10.6786	10.6048	10.5529	10.5707	10.9849	10.6532	11.0517	11.0557	11.009	10.998	10.9994	11.0114	10.6821	11.0501	10.6785	10.6914	11.1307	10.6302	10.6398	10.7034	10.6599	11.3478	11.1985	10.6095	10.985	11.1736	11.0423	11.1219	10.9411	10.5558	10.5266	10.5534	10.5855	11.0813	10.6295	11.0799	10.7493	11.028	11.0555	10.5038
329	7	10962599	10978345	15746	10.6759	10.5478	10.521	10.5377	10.6832	10.5673	10.5898	10.4826	10.5447	10.4565	10.7101	10.5839	10.5389	10.4955	10.5024	10.479	10.4811	10.7231	10.4404	10.7095	10.6223	10.4623	10.7274	10.7141	10.7265	10.5754	10.2492	10.2218	10.6616	10.5092	10.1824	10.4741	10.3468	10.4577	10.7028	10.6871	10.8715	10.661	10.5682	10.734	10.638	10.7919	10.5293	10.5095	10.477
330	7	12198129	12258765	60636	9.43638	9.88864	9.45903	9.89402	9.89046	9.42519	9.84562	9.54656	9.36663	10.143	9.31591	9.83135	10.1766	10.1949	9.82899	9.79413	9.77184	9.30963	9.80026	9.94783	9.45336	10.1893	9.31766	9.84744	9.39767	9.41533	10.2901	10.0755	9.87672	9.85978	10.1375	9.85283	10.0655	9.80549	9.3885	9.35423	9.87262	9.92496	9.91746	9.39112	10.1712	9.94105	9.79221	9.84699	9.85043
331	7	12671417	12671825	408	9.5477	10.1973	9.72452	10.6806	10.3786	10.2319	10.3681	9.82737	10.2933	10.603	9.55707	10.3194	10.6903	10.6217	10.324	10.6513	10.346	9.4716	10.6452	10.6235	10.3099	10.5814	9.66084	10.3409	9.61129	9.67881	10.6602	10.5018	10.5798	10.3489	10.5934	10.6213	10.7258	10.3386	10.3465	10.3058	10.3757	10.3876	10.3609	10.3452	10.7053	10.2854	10.3352	10.2544	10.2924
332	7	12712933	12770476	57543	9.83405	10.292	9.83544	10.5761	10.2881	10.2532	10.2373	9.95843	10.2422	10.5597	9.77797	10.2489	10.5701	10.5616	10.1995	10.5379	10.2474	9.70787	10.5586	10.5999	10.3007	10.5609	9.8177	10.2481	9.81703	9.87436	10.6015	10.6341	10.5952	10.2811	10.5679	10.5852	10.5492	10.2212	10.1853	10.1893	10.2187	10.2638	10.2717	10.3253	10.6537	10.3019	10.2226	10.2196	10.3009
333	7	16481510	16489413	7903	11.0295	10.8471	10.8517	11.0215	10.8498	10.8783	10.8915	10.8412	11.2618	10.7514	11.3621	10.9011	11.3839	11.349	10.9211	11.2643	10.8604	11.3651	11.3217	11.5976	10.859	10.6757	10.9682	10.7855	10.8895	11.0202	10.903	10.8253	11.5582	10.7471	10.8924	11.375	10.8039	11.0652	11.4027	10.8394	11.5137	10.7761	10.7635	11.4218	10.9677	11.4247	10.8885	11.4417	10.9042
334	7	20658198	24083399	3425201	10.1405	10.5085	10.2262	10.2454	11.0106	9.97068	10.0949	10.2032	10.1001	10.394	10.9432	10.0033	10.2674	10.284	10.1399	10.3866	10.1068	10.3608	10.3785	10.339	10.7739	10.4316	10.317	10.0945	10.1682	10.7803	10.4096	10.3924	10.1026	10.3024	10.3644	10.1771	10.2952	10.2801	10.304	10.1198	10.2505	10.1981	10.3596	10.3861	10.2061	10.2162	10.0824	10.1772	10.0265
335	7	27627143	27736250	109107	10.6557	10.1861	10.5794	10.6911	10.6284	9.40125	10.6219	9.54771	10.5788	10.6549	10.6387	10.6576	10.1832	10.2084	10.635	10.6835	10.2309	10.1706	9.37767	10.1669	10.6369	10.2019	10.6425	10.2007	10.6911	10.248	10.1995	10.2763	10.1792	10.1475	9.37304	10.2049	10.1156	10.626	10.515	10.1378	9.37247	10.603	10.1368	10.2048	10.5903	10.6255	10.1807	9.45243	10.6217
336	7	31017542	31018654	1112	10.5428	10.4664	10.8803	10.6915	10.6942	10.4539	9.96195	10.8534	10.6136	10.7931	10.4609	10.4112	10.7482	10.4569	9.92014	10.5707	10.5845	9.63513	10.8169	10.4595	10.8229	10.8348	10.8177	10.4468	10.4735	10.838	10.4216	10.1187	9.9982	10.8334	10.4881	10.8058	10.7902	10.5271	9.82217	10.8896	10.4744	10.9212	10.3995	10.8352	10.7974	10.8078	10.5489	9.90734	10.6271
337	7	32532002	32694597	162595	10.6155	10.1881	10.4757	10.5353	10.5029	10.1473	10.2957	10.1153	10.5328	10.4094	10.1629	10.0472	10.3866	10.0927	10.3657	10.0915	10.5473	10.6267	10.4594	9.81627	10.4609	10.4843	10.4372	10.6267	10.4845	10.4581	10.2222	9.87855	9.81327	10.3481	10.5681	10.4663	10.2894	10.0025	9.68237	10.0132	10.0071	10.3708	10.621	10.3204	10.1787	10.4635	10.0645	9.77672	10.5314
338	7	35461546	35461901	355	10.3446	10.2433	10.7905	9.69048	10.3877	10.3434	10.3926	9.89538	9.80342	10.3457	10.2156	9.489	9.7486	9.76452	9.71843	9.74659	9.79206	10.2757	10.6579	9.59925	9.71475	9.77629	10.3166	9.68777	10.3124	10.3319	9.54305	9.6816	9.62432	9.60365	9.76769	9.64956	10.3569	10.2825	10.3386	10.8016	10.7877	10.4245	9.63965	9.67955	10.4311	9.6559	10.2326	9.66716	9.9031
339	7	35802070	35807318	5248	10.3567	10.3525	9.93359	10.5152	10.3232	10.3799	10.4096	10.4049	10.4995	10.3014	10.4664	10.657	10.5053	10.4729	10.564	10.5199	10.5146	10.4306	9.87426	10.5961	10.5765	10.5082	10.328	10.602	10.3712	10.3422	10.6776	10.4904	10.562	10.526	10.5199	10.5633	10.3092	10.3588	10.3224	9.76296	9.79949	10.332	10.5473	10.4481	10.2411	10.4719	10.3173	10.5334	10.3688
340	7	38961668	38997301	35633	11.3032	11.4134	11.2627	11.2901	11.4202	11.5256	11.2317	10.5318	11.2674	11.2541	11.632	11.2918	11.4849	11.4715	11.3056	11.1966	10.4463	11.5369	11.2225	11.2491	11.4886	11.2086	11.5407	11.2822	10.5051	11.5647	11.5651	10.5135	10.529	11.5006	11.4822	11.5142	11.2562	11.2887	11.2637	11.5549	11.5441	10.5367	11.3608	11.5417	11.3253	10.5118	11.4353	11.5422	11.1828
341	7	39096069	46665068	7568999	10.8351	10.5509	10.8505	10.7977	10.8954	10.8104	10.4889	10.2278	10.6958	10.4678	10.7544	10.6226	10.7284	10.7379	10.4511	10.4033	10.536	10.7169	10.6969	10.6773	10.6284	10.706	10.8817	10.6664	10.1378	10.7985	10.6437	10.2568	10.1714	10.7196	10.5533	10.7949	10.6985	10.4294	10.6469	10.7426	10.4761	10.7454	10.4717	10.6306	10.7165	10.6047	10.5039	10.7843	10.6963
342	7	48319662	48548430	228768	10.2244	10.8757	10.2624	10.655	10.2528	10.6306	10.8101	10.7035	10.6042	10.757	10.5369	10.4789	10.6461	10.6283	10.7894	10.7103	10.5288	10.5452	10.6259	10.5032	10.8297	10.5469	10.274	10.4776	10.6246	10.7081	10.9196	10.7497	10.7099	10.628	10.7988	10.6674	10.6164	10.7392	10.5255	10.6446	10.7733	10.0463	10.7182	10.8534	10.5829	10.4523	10.8276	10.574	10.653
343	7	50914593	50919381	4788	9.21258	10.6982	9.34074	10.3073	9.24744	10.2997	10.7397	10.6167	10.3349	10.7275	10.3118	10.2777	10.2861	10.3105	10.7269	10.6683	10.3116	10.3223	10.3553	10.3211	10.7429	10.3893	9.09593	10.3287	10.7438	10.3539	10.785	10.6015	10.6683	10.3471	10.8141	10.3163	10.3719	10.7563	10.2141	10.2921	10.7985	9.23401	10.79	10.7057	10.2691	10.2879	10.6986	10.2529	10.2994
344	7	54636276	54680897	44621	10.1372	9.80484	10.1556	10.1621	10.2222	9.81447	9.79822	9.83641	10.628	9.72368	10.2185	9.80464	9.75803	10.1429	10.1701	9.84665	10.123	10.1825	9.79364	9.79522	10.15	10.2162	9.79128	9.75855	10.2536	9.78153	9.79181	10.0961	9.79303	10.1509	9.73714	9.77708	9.63468	9.74137	10.034	9.74034	9.76692	10.6526	10.2108	9.79818	10.1902	9.8387	9.77177	10.6767	10.0669
345	7	54813251	54974058	160807	11.1085	11.3893	11.0449	11.1276	11.1248	11.1879	11.304	11.2394	10.5663	11.3336	11.1155	11.3406	11.3415	11.109	11.051	11.2852	11.0472	11.1292	11.2925	11.2026	11.0403	11.0792	11.3363	11.3409	11.0926	11.3256	11.3685	11.0268	11.3034	11.0197	11.2899	11.3253	11.3888	11.3709	11.036	11.3936	11.3575	10.5495	11.1444	11.4005	11.0387	11.4155	11.3846	10.5849	11.0512
346	7	54976185	55008187	32002	10.12	9.97335	10.1265	10.2277	10.1956	9.92774	9.8672	9.90039	10.3138	9.88936	10.1602	9.79305	9.86078	10.1171	10.0934	9.83457	10.0711	10.0847	9.852	9.86471	10.1602	10.1264	9.81063	9.79691	10.1857	9.9245	9.92291	10.1372	9.91879	10.1203	9.88357	9.93076	9.70565	9.71953	10.0178	9.79881	9.67835	10.2483	10.1891	9.88829	10.1585	9.92789	9.81574	10.3605	10.1896
347	7	55012164	55036726	24562	10.6349	11.2107	10.5748	10.5901	10.4758	11.1471	10.9856	10.9737	9.91582	11.0596	10.5651	11.0848	11.0881	10.6323	10.4437	11.121	10.5617	10.523	11.1453	11.134	10.667	10.6424	11.1533	11.2346	10.6707	11.0607	11.133	10.5915	11.0902	10.4451	11.0535	11.1342	10.6425	11.2158	10.6682	11.0396	10.8105	10.0029	10.6394	10.9582	10.4482	11.1092	11.1712	10.146	10.6396
348	7	55052585	55194801	142216	10.3643	9.95463	10.3682	10.4278	10.3798	9.94788	9.88255	9.89309	10.6977	9.84874	10.3858	9.86275	9.87021	10.3636	10.3319	9.90163	10.3394	10.3396	9.91143	9.91671	10.3649	10.3735	9.8931	9.89044	10.3727	9.91669	9.95501	10.3454	9.89491	10.3204	9.82748	9.89382	9.65879	9.74939	10.2345	9.70574	9.64239	10.6589	10.3953	9.82059	10.2926	9.87415	9.85194	10.7502	10.308
349	7	55454535	55702761	248226	10.3379	9.77368	10.3574	10.3476	10.3341	9.8446	9.84749	9.93723	10.6618	9.82956	10.2891	9.78838	9.79653	10.3379	10.3521	9.87898	10.3989	10.3363	9.83481	9.78754	10.3737	10.3587	9.80033	9.74693	10.2722	9.90275	9.76649	10.3406	9.85972	10.3394	9.84241	9.84264	9.73478	9.79052	10.3405	9.86774	9.77568	10.6908	10.2757	9.90477	10.3668	9.90856	9.77906	10.6868	10.3088
350	7	60618457	60731880	113423	10.0032	9.96006	9.97895	10.0258	9.53372	9.9699	9.99144	9.6232	10.4266	9.93232	9.43035	9.99778	10.0183	10.0041	9.50219	9.97273	9.98837	9.43172	9.96063	9.47378	10.0518	9.6071	9.47608	9.51919	10.0007	9.51919	10.4458	9.97916	10.0299	9.98698	10.448	10.0067	10.385	9.94107	10.4285	9.95687	9.98298	9.98495	10.5452	10.0543	10.0209	9.49147	9.94829	9.49918	10.0293
351	7	78961795	78971649	9854	10.0394	9.90254	9.80767	10.0022	9.92559	10.4493	9.72703	9.91646	10.353	10.5062	9.67025	10.5005	9.35963	9.67393	9.7279	9.91867	9.76463	9.95519	10.0107	9.66422	9.77086	10.3217	9.94239	9.68139	9.83368	10.508	9.69785	9.93331	9.72239	10.475	9.49307	9.72094	10.6439	9.82682	9.98676	10.5672	9.67192	9.97222	9.66418	9.93614	10.5491	10.3109	9.7206	10.5102	9.9548
352	7	79385029	79385270	241	10.2355	10.067	9.37624	9.89415	9.71884	10.1718	9.28955	9.28229	9.42037	10.0689	9.37385	10.4256	8.44635	9.41635	9.51888	10.0347	9.41112	10.0607	10.0019	9.469	9.09994	9.74685	10.1356	9.48397	10.3287	10.2642	9.4796	9.87995	9.33334	10.1516	8.59881	9.39799	10.5647	9.47257	9.52636	10.4027	8.68236	9.40884	9.48068	9.52111	10.6723	9.83271	9.35032	10.5116	9.46722
353	7	83036560	83045516	8956	10.3243	9.63058	10.9427	10.3732	9.54421	10.2875	10.8025	10.2672	9.58136	10.3824	10.9734	10.4673	11.0409	10.977	9.55109	10.361	10.2924	10.3904	10.3244	11.0646	10.4131	10.8883	10.9338	9.62619	9.65673	10.3319	10.3588	10.2984	9.57469	10.8723	10.9716	10.358	10.5109	9.56733	9.46056	10.3731	11.1602	10.4326	11.1907	10.9358	11.0053	10.4229	9.72429	10.375	10.8775
354	7	86827857	86840870	13013	10.8989	10.3479	10.8761	10.971	10.954	10.2965	10.9292	10.5666	10.8931	10.6854	10.9971	11.0064	10.9955	10.9747	10.9364	10.667	10.9841	10.7165	10.9114	10.6756	10.213	10.9287	10.753	10.1971	10.7117	10.6391	10.9636	10.6544	10.6928	10.6748	10.9169	10.7227	10.8783	10.6652	10.8593	10.6438	10.8442	10.6595	10.7512	10.9073	10.7244	10.6472	10.722	10.8787	10.588
355	7	109754987	109760894	5907	10.5073	10.4767	10.0152	8.81912	10.5829	10.6318	10.5426	9.87091	10.405	10.4753	10.5211	10.0604	8.8406	8.84181	10.5898	9.96284	9.90319	10.0567	10.0903	10.569	10.0789	10.0278	10.1387	10.0217	10.5186	9.97013	10.0339	10.4244	9.95605	10.522	8.96194	10.0494	10.0386	10.5533	10.0455	10.2802	10.0354	10.1127	8.77557	10.0942	8.9215	10.2014	9.96709	10.6818	9.96753
356	7	109794774	109817326	22552	10.6106	10.5896	10.0643	9.61794	10.628	10.4968	10.5709	10.0743	10.6318	10.621	10.6876	10.2456	9.48443	9.55931	10.6573	10.1224	10.165	10.1828	10.1572	10.6716	10.2024	10.2339	10.2099	10.1579	10.5979	10.2323	10.1612	10.5328	10.1974	10.7312	9.55594	10.2151	10.0968	10.5657	10.0389	10.5066	10.0865	10.1925	9.52333	10.133	9.50689	10.1642	10.1478	10.5731	10.0969
357	7	109855744	109858484	2740	10.8118	10.8003	10.3137	9.3385	10.8943	10.7959	10.8165	10.3201	10.7741	10.8266	10.8759	10.3814	9.43361	9.34147	10.7979	10.3655	10.3153	10.3619	10.3691	10.8617	10.3845	10.3547	10.3475	10.3675	10.8376	10.3622	10.2869	10.8262	10.4184	10.8324	9.33532	10.3521	10.4664	10.7452	10.3483	10.8808	10.4658	10.3061	9.21547	10.4542	9.50636	10.4486	10.2498	10.7592	10.2094
358	7	110073824	110096332	22508	10.8093	10.7391	10.3943	10.1606	10.7912	10.7069	10.7103	10.3419	10.6973	10.7549	10.7523	10.3599	10.062	10.0647	10.7218	10.399	10.4207	10.346	10.3304	10.7106	10.3526	10.4044	10.3734	10.3228	10.6909	10.348	10.3435	10.724	10.3973	10.7256	10.0795	10.3987	10.3667	10.705	10.3717	10.7532	10.4842	10.4083	10.1351	10.4453	10.2654	10.4133	10.3305	10.6355	10.255
359	7	110142788	110201227	58439	10.5904	10.5703	10.1844	9.84839	10.5921	10.5572	10.5053	10.1476	10.5014	10.536	10.5983	10.2325	9.78329	9.7964	10.5695	10.2355	10.2073	10.2183	10.2684	10.5996	10.2159	10.2209	10.2416	10.2305	10.5461	10.1874	10.2422	10.4939	10.2461	10.5852	9.87227	10.2531	10.2427	10.503	10.1254	10.5818	10.287	10.1675	9.77806	10.1951	9.87292	10.2516	10.1197	10.5177	10.1734
360	7	110370159	110491407	121248	10.6629	10.7092	10.3424	10.1176	10.6862	10.6002	10.6188	10.3357	10.6169	10.6622	10.7248	10.4011	10.0708	10.0318	10.6371	10.4084	10.3897	10.3882	10.3748	10.7067	10.3917	10.3961	10.4307	10.3766	10.6837	10.3818	10.3839	10.6619	10.419	10.6577	10.0787	10.4003	10.3741	10.6519	10.3606	10.6717	10.4741	10.3448	10.0877	10.4373	10.1699	10.4743	10.4224	10.6906	10.3153
361	7	111067015	111077749	10734	10.5909	10.6493	10.082	9.60048	10.6514	10.4812	10.579	10.0304	10.4739	10.6055	10.6132	10.1697	9.55138	9.56521	10.608	10.1384	10.117	10.1148	10.1234	10.6591	10.0573	10.1294	10.1235	10.1762	10.6264	10.0979	10.1561	10.5269	10.205	10.5439	9.60761	10.0626	10.0838	10.4884	10.0682	10.5763	10.3668	10.1118	9.55988	10.2202	9.73649	10.2662	10.0522	10.4862	10.1016
362	7	111120174	111154197	34023	10.735	10.7678	10.3309	9.9987	10.7915	10.7457	10.7347	10.3214	10.7072	10.7834	10.7829	10.3892	9.81442	9.91507	10.7289	10.3879	10.4108	10.4004	10.4417	10.7682	10.4451	10.4053	10.3978	10.4356	10.7888	10.3863	10.4098	10.763	10.3422	10.7364	9.88869	10.3893	10.3857	10.7401	10.3595	10.7965	10.3698	10.3436	9.92478	10.3836	9.83467	10.3977	10.3779	10.7961	10.3539
363	7	111428102	111428284	182	8.66333	8.70634	9.96514	10.498	8.71505	8.76609	8.56494	10.0041	8.67846	8.67919	8.73873	9.98998	10.5566	10.5744	8.50102	9.94059	10.036	9.99768	9.99255	8.68098	10.0025	10.0607	9.93569	10.0185	8.4924	9.89026	9.97031	8.73287	10.0308	8.55447	10.5268	9.9461	9.65351	8.70989	9.76872	8.58835	9.56431	9.76799	10.5175	9.71405	9.94848	9.80009	10.0002	8.80075	9.91826
364	7	111485184	111501846	16662	10.6421	10.6376	10.3738	9.92925	10.6017	10.6175	10.655	10.4057	10.6257	10.602	10.5964	10.3173	9.8644	9.90157	10.6275	10.3477	10.3763	10.2943	10.3009	10.6254	10.2935	10.3374	10.3221	10.3285	10.6261	10.3364	10.3087	10.6039	10.3489	10.6424	9.84605	10.268	10.1717	10.6305	10.3014	10.5863	10.1946	10.303	9.84714	10.2692	9.84838	10.2705	10.3269	10.63	10.3962
365	7	111647983	111683670	35687	9.91861	9.93062	10.4422	10.7209	9.89547	10.0099	9.89174	10.3796	9.91295	9.88778	9.8391	10.4378	10.7229	10.7433	9.83684	10.4405	10.4537	10.4003	10.4148	9.88556	10.4452	10.4354	10.4524	10.415	9.94439	10.4034	10.3987	9.99334	10.4223	9.80961	10.684	10.3991	10.3199	9.89017	10.4248	9.899	10.3261	10.4159	10.7276	10.3952	10.6866	10.4724	10.4292	9.95194	10.4211
366	7	112352842	112433900	81058	10.4538	10.5568	10.1397	10.0368	10.4827	10.3762	10.4373	10.1305	10.383	10.4392	10.479	10.1295	9.99615	10.0128	10.431	10.1504	10.1463	10.1349	10.0895	10.4412	10.1206	10.1745	10.1675	10.1475	10.5051	10.1313	10.1114	10.4673	10.1924	10.449	9.94669	10.1132	10.1021	10.468	9.87652	10.4603	10.0385	10.1296	10.0374	10.1431	9.82451	10.4173	10.1326	10.4092	10.0873
367	7	113403102	113539296	136194	10.966	10.9229	10.5996	10.2078	10.9257	10.9377	10.9195	10.6373	10.5679	10.9546	10.8671	10.5297	10.1153	10.1626	10.54	10.5516	10.5638	10.4844	10.601	10.9085	10.6374	10.5738	10.568	10.5321	10.8887	10.6189	10.5398	10.9551	10.582	10.96	10.1684	10.5545	10.3426	10.4826	10.0798	10.9076	10.4715	10.5267	10.0309	10.4944	10.0098	10.9155	10.4361	10.9009	10.6274
368	7	115004586	115041563	36977	9.92792	9.95232	10.4933	10.4234	10.4991	9.97821	9.97632	10.0751	10.4751	9.93605	9.87908	10.4685	10.8798	10.8432	10.4682	10.4766	10.5033	10.4958	10.4536	9.89591	10.5593	10.5802	10.5598	10.499	9.93786	10.4099	10.4206	10.023	10.4836	9.88422	10.8467	10.4268	10.3392	10.4171	10.8507	9.79115	10.4709	10.3806	10.8773	10.4829	9.92465	9.88066	10.4291	9.82317	10.4432
369	7	115270034	115271579	1545	10.6076	10.6043	10.2966	10.3567	10.4039	10.463	10.5151	10.4891	10.2887	10.4811	10.6066	10.3295	9.98745	9.91063	10.3029	10.3329	10.2221	10.3164	10.3314	10.5121	10.4208	10.339	10.2196	10.2097	10.5728	10.3649	10.3919	10.5287	10.3539	10.6831	10.1044	10.4118	10.341	10.1965	9.93725	10.5182	10.5961	10.4377	9.83472	10.5515	10.9517	10.9391	10.4204	10.6745	10.3431
370	7	115300845	115399384	98539	10.0909	10.1306	9.94514	9.91327	9.89255	10.0788	10.0605	10.0206	9.94239	10.0619	10.0878	9.89541	9.57118	9.61281	9.92682	9.94808	9.93387	9.88408	9.90782	10.1185	9.92752	9.97668	9.9625	9.92783	10.1115	9.89272	9.91556	10.0996	9.92583	10.0877	9.63585	9.93001	9.79681	9.8574	9.59633	9.98004	9.82456	9.91263	9.60568	9.89549	10.0004	10.047	9.85518	10.0285	9.94786
371	7	115400336	115401546	1210	10.0624	10.0892	10.167	10.252	10.2367	9.83678	9.93673	9.92772	10.1313	9.93493	10.0231	10.276	10.8489	10.6666	10.2237	10.2694	10.1949	10.3216	10.1371	10.0331	10.1519	10.1317	10.1816	10.1732	10.0981	10.1486	10.2557	9.91758	10.2446	9.89274	10.57	10.1857	10.1371	10.1993	10.6273	9.88718	10.4982	10.0971	10.8881	10.2516	10.095	10.0258	10.252	10.114	9.9347
372	7	115511458	115540995	29537	10.6672	10.6569	10.3451	10.4087	10.3568	10.6139	10.5869	10.654	10.4014	10.6479	10.7199	10.3958	9.87667	9.96159	10.3456	10.3677	10.3757	10.3621	10.3709	10.7219	10.3993	10.4391	10.4544	10.3573	10.6672	10.3981	10.4194	10.6241	10.405	10.6831	9.91017	10.3604	10.37	10.3713	9.88132	10.657	10.4284	10.3749	10.0149	10.3715	10.848	10.7288	10.3824	10.6985	10.4009
373	7	115566346	115604872	38526	10.5718	10.6526	10.0493	10.0888	10.099	10.5218	10.5214	10.4417	10.0444	10.5863	10.5228	10.1303	9.78721	9.85016	10.0924	10.1221	10.1015	10.0646	10.1234	10.5777	10.104	10.1438	10.0295	10.0925	10.6451	10.1304	10.1089	10.503	10.1168	10.5076	9.78245	10.1173	9.94446	10.0433	9.73958	10.5277	10.1192	10.0128	9.77839	10.0961	10.6946	10.6737	10.0161	10.4892	9.98963
374	7	115735206	115755917	20711	10.8113	10.905	10.2809	10.3331	10.4022	10.7447	10.79	10.6158	10.2361	10.8607	10.9041	10.5227	9.39858	9.29781	10.3496	10.3595	10.3292	10.4398	10.2475	10.9584	10.3153	10.3323	10.4398	10.3942	10.9116	10.2797	10.45	10.8255	10.3483	10.8878	9.34696	10.3502	10.3143	10.391	9.33404	10.5859	10.1604	10.1911	9.42059	10.2884	10.673	10.8274	10.3937	10.657	10.2097
375	7	116229414	116230142	728	10.1904	10.3127	9.39571	9.74911	9.65079	10.1018	10.2274	9.78436	9.49244	10.4273	10.2452	9.67374	7.81448	7.72358	9.67424	9.56173	9.63339	9.75503	9.64105	10.1409	9.37712	9.4394	9.49412	9.5945	10.1904	9.5532	9.67899	10.1596	9.66776	10.3701	7.96087	9.63402	9.77919	9.4276	7.78478	10.317	9.98329	9.35688	7.85013	9.75978	10.5814	10.433	9.49706	10.1568	9.30201
376	7	116559867	116581880	22013	10.2433	10.1948	9.91392	9.8929	10.2881	10.2678	10.2659	10.2554	9.93211	10.2641	10.2608	9.80577	9.44627	9.40057	9.86779	9.90399	9.92056	9.86692	9.87179	10.3051	9.91117	9.92793	10.2672	9.84925	10.2627	9.89557	9.83929	10.3469	9.91935	10.2461	9.52033	9.88129	9.97376	9.79838	9.84485	10.3735	10.0293	9.83777	9.40564	9.90796	10.3793	10.2735	9.80474	10.2925	9.85543
377	7	117633683	117650114	16431	10.9484	10.9083	10.375	10.262	10.8238	10.869	10.921	10.8254	10.326	10.8553	10.8818	10.3441	9.63451	9.63217	10.3989	10.4819	10.473	10.1852	10.5109	10.9291	10.4463	10.3984	10.9856	10.2523	10.8387	10.333	10.3406	10.8785	10.3773	10.8674	9.74672	10.349	10.0608	10.3226	10.2716	10.9343	10.266	10.3841	9.55297	10.3248	10.8486	10.957	10.2929	10.8347	10.3087
378	7	126424614	126433784	9170	10.231	10.7686	10.7672	10.7068	10.7236	10.7672	10.7492	10.3336	10.2138	10.7103	10.1843	10.1635	10.1567	10.1736	10.7357	9.35673	10.7463	10.7291	10.2614	10.1365	10.1591	10.7186	10.1188	10.7718	10.8106	10.7661	10.803	10.8028	10.7433	10.7762	10.1719	10.7198	10.1423	10.2579	10.7203	10.7484	10.6534	10.7865	10.5582	10.22	10.6011	10.6681	10.1767	10.7101	10.3649
379	7	126590644	126592641	1997	10.8737	9.82316	9.83802	9.82553	9.89012	9.89955	9.93185	10.856	10.8965	9.79799	10.9682	10.9468	10.9796	10.9636	9.92499	11.2868	9.94655	9.84599	10.9668	10.9359	10.8804	9.87245	10.9604	9.73941	9.84401	9.87948	9.76291	9.80028	9.81038	9.791	10.9038	9.9124	11.0241	10.816	9.84936	9.88765	9.76915	9.82078	9.91294	10.8927	9.88364	9.89283	10.851	9.8244	10.7243
380	7	130213756	130215357	1601	10.1836	10.9339	10.9091	10.9344	10.9968	10.623	10.7194	10.6576	10.8359	8.32249	10.9699	11.0154	11.1046	10.9852	10.9194	10.9632	10.9233	10.9532	10.7872	10.8885	10.7941	10.8583	10.9655	10.8142	10.27	10.7857	10.148	10.7296	10.9341	11.0769	10.8927	10.8533	10.2108	10.2614	8.21996	10.6789	10.9878	10.8017	10.9536	10.9531	10.9973	10.9465	9.98511	10.0071	10.7781
381	7	133164530	133182625	18095	10.1553	10.4414	10.2479	9.46145	10.0563	9.59267	9.43767	9.75975	10.5487	10.1293	9.92056	9.85525	9.94502	10.0237	10.0802	9.49048	10.1139	9.06883	9.96204	9.94883	9.51946	10.0027	9.95263	10.0161	10.3926	10.3531	9.93526	9.74303	10.005	9.95974	10.0387	10.0657	10.0105	10.0791	9.45452	9.48626	9.85403	10.1994	10.0348	9.98711	9.90103	9.98867	9.31409	10.2714	10.5697
382	8	28371247	28479196	107949	10.0115	9.9851	10.2358	10.0054	9.75996	10.1775	10.245	9.97905	9.97413	10.0074	10.0222	10.027	9.99028	10.1855	9.96704	9.7204	9.95723	10.2903	9.74598	9.78939	9.96373	10.2486	9.97762	10.2246	10.0429	9.98153	9.76276	9.96956	10.0096	9.96498	9.98516	9.75309	10.3363	10.2435	10.0116	9.98636	9.9687	9.99822	10.2694	10.2277	9.74139	10.2383	10.035	10.2794	10.0295
383	8	28519836	28531880	12044	10.0496	10.083	10.3179	10.0729	9.58251	10.213	10.3213	10.0036	10.0365	9.7704	10.0563	9.77532	9.71859	10.1615	10.0344	9.55826	10.0096	10.3273	9.51945	9.79562	10.0834	10.348	10.0383	10.1798	9.721	10.0528	9.55774	10.0314	9.80483	10.0237	9.73038	9.55175	10.3519	10.1757	10.0509	10.0604	10.1065	10.092	10.2478	10.3267	9.60446	10.2643	9.79259	10.1907	10.1303
384	8	28608199	28691596	83397	10.4797	10.0436	10.4632	10.5505	10.0788	10.3449	10.5468	10.077	10.5315	10.1536	10.5475	10.2006	10.205	10.4125	10.5575	10.0707	10.097	10.5955	10.0562	10.1257	10.0664	10.4958	10.5642	10.4905	10.1527	10.034	9.96244	10.096	10.2259	10.0752	10.1499	10.0092	10.4173	10.3555	10.0063	10.0484	10.0356	10.0165	10.3619	10.6017	10.0701	10.381	10.1223	10.2714	9.96901
385	8	28730777	28743469	12692	10.6537	10.1809	10.5149	10.6073	10.1838	10.5003	10.6197	10.1837	10.607	10.2471	10.6256	10.2972	10.3235	10.604	10.6472	9.53318	10.1624	10.6191	10.2104	10.2812	10.1664	10.5659	10.6465	10.6416	10.2687	10.1704	9.48908	10.2141	10.2836	10.223	10.3007	9.52581	10.7344	10.5412	10.1224	10.2063	10.2343	10.1296	10.636	10.5539	9.50248	10.6022	10.2999	10.5677	10.1915
386	8	29493904	29531641	37737	10.7849	10.754	10.7543	10.651	10.6686	10.6679	10.7867	10.7758	10.8318	10.1377	10.7572	9.64554	10.2871	10.826	10.786	9.71298	10.4179	10.2615	10.849	10.7599	10.314	10.8216	10.8663	10.7465	10.2192	10.3625	9.64215	10.7695	10.3772	10.3051	10.3289	10.2231	10.6923	10.8264	10.2329	10.2467	10.2563	10.7942	10.5464	10.7039	10.6562	10.1533	10.2079	10.5645	10.2321
387	8	30463842	30483664	19822	10.6206	10.6641	10.6432	10.7209	10.6572	10.5422	10.7066	10.5894	10.674	10.1694	10.7102	8.98048	10.1026	10.695	10.6295	9.054	10.152	10.1088	10.5382	10.6995	10.1907	10.6995	10.6608	10.684	10.1362	9.97315	9.0468	10.6529	10.0947	10.1153	10.1509	10.0389	10.5779	10.4949	10.0165	10.0295	10.0517	10.5785	10.6959	10.6767	10.6395	10.0212	9.95091	10.4861	9.75437
388	8	34256748	34305880	49132	10.0123	10.4778	9.77535	9.82682	9.82787	9.78843	10.0462	9.784	9.7151	9.69728	10.1042	9.72668	10.0825	9.78913	10.0157	10.4576	10.0614	10.0504	10.1065	9.72654	10.1134	9.75384	9.7539	10.0894	9.79053	10.0749	10.5445	9.76635	10.0791	10.0463	10.0854	9.76051	9.64476	9.61705	9.99697	10.0757	10.099	9.67504	9.8246	10.0814	9.77373	9.73008	9.73424	9.673	10.0261
389	8	50456466	50456470	4	10.3102	10.4621	9.98736	9.75885	10.309	10.1226	10.1969	9.82507	9.96143	10.237	10.3206	9.83013	9.91026	10.3318	10.2477	10.2433	10.1175	10.4177	10.1962	10.1676	10.0746	10.2911	10.3062	10.2503	10.381	10.1045	10.3722	10.2821	10.3198	10.2781	9.54322	10.3154	10.4833	9.57239	10.1595	10.2795	10.6418	10.124	10.5389	10.5025	10.7086	9.88525	10.2216	10.2302	9.80094
390	8	52224120	52273067	48947	10.0965	9.8749	10.6254	9.93235	10.1212	10.6691	10.6599	10.1257	10.1011	10.7602	10.7792	10.161	9.88369	10.2077	10.6792	10.7789	10.1419	10.8009	10.6374	9.84796	10.0908	10.1742	10.7692	10.7374	10.1712	10.6835	10.6907	10.1624	10.7336	10.1082	9.83038	10.0682	10.7151	10.1506	10.773	10.8524	10.8692	10.0828	9.83967	10.8112	10.8897	10.1934	10.8073	10.6672	10.1181
391	8	52394663	52466264	71601	10.0185	10.2004	9.70958	10.2903	10.0633	9.75119	9.73467	10.0587	9.89343	9.77859	9.7603	10.0257	10.2047	9.91862	9.71629	10.1411	9.9183	9.13969	9.22466	10.2979	10.0749	10.0521	9.71716	9.71797	9.98514	10.1393	10.1398	10.0052	10.1915	9.99524	10.2181	9.99553	9.12285	10.0074	9.8136	10.1728	9.88201	10.0738	10.2478	10.2643	10.0332	10.1563	9.69927	9.77296	10.0284
392	8	52870886	52923754	52868	10.0734	10.0317	10.1135	10.0625	10.0877	10.0417	10.1528	9.98055	9.94696	10.1818	10.1303	10.1428	10.0877	9.9639	10.1807	10.4702	9.90921	9.82681	9.82092	9.93776	10.1085	10.1659	10.2009	10.128	10.1746	10.4212	10.3709	10.0823	10.4522	10.1124	10.0316	10.0474	9.4428	9.99961	9.94814	10.2675	9.885	9.96531	10.0351	10.2589	9.87538	9.96219	10.1028	10.0037	9.88428
393	8	53127775	53284994	157219	10.3616	10.3376	10.6788	10.4126	10.391	10.7091	10.7292	10.3581	10.379	10.7432	10.736	10.3802	10.4061	10.4064	10.7199	10.7326	10.7688	10.7691	10.7342	10.4604	10.411	10.7109	10.7739	10.6945	10.7226	10.7352	10.7277	10.3972	10.7922	10.3894	10.4272	10.3764	10.709	10.2831	10.6735	10.7329	10.8742	10.3527	10.3971	10.858	10.9122	10.464	10.6498	10.6429	10.2742
394	8	55050369	55055813	5444	9.87316	9.85111	9.93931	10.0713	10.0474	10.0398	9.82612	10.101	9.86392	10.0148	10.0408	10.7294	10.1426	9.85708	10.0996	10.1596	10.1353	9.7928	9.91145	10.0369	9.86748	10.6937	9.90254	10.1405	10.6876	10.636	10.0253	10.1431	10.085	10.1164	10.012	10.0682	9.96155	9.94678	10.0065	10.0106	10.1402	10.0818	9.93491	10.0985	9.89789	10.0405	9.76085	9.90843	10.5661
395	8	62393103	62420070	26967	10.6928	10.6811	10.6156	10.4297	10.7494	10.3227	10.7279	10.5377	10.6943	10.6903	10.6845	10.2215	10.4848	10.6972	10.6691	10.353	10.7366	10.7521	10.6746	10.737	10.7126	10.6515	10.702	10.6462	10.6219	10.7048	10.6412	10.379	10.73	10.7493	10.4311	10.6882	10.6478	10.2864	10.3876	10.3062	10.8323	10.3433	10.7936	10.8112	10.9534	10.5197	10.5958	10.6649	10.0887
396	8	76812850	76823496	10646	10.4032	10.3025	10.089	10.1181	10.3884	10.1186	10.2577	9.82064	10.0809	10.3618	10.1523	10.1823	10.0802	10.1059	10.0498	10.3171	9.77028	10.1916	10.0767	9.74986	10.2892	9.76818	10.8645	10.3582	9.63226	10.153	10.1429	10.3635	10.7939	10.272	10.161	10.3291	9.87649	10.2906	10.1655	10.4338	9.92805	10.2761	10.4287	10.461	10.5012	10.5065	10.1804	10.352	10.4205
397	8	79438032	79453386	15354	10.4171	10.0185	10.4447	10.4559	10.4905	9.95968	10.422	10.2355	10.3743	10.402	10.2649	10.0807	10.1317	9.99383	10.2336	10.3691	10.2757	10.5304	10.4034	10.4264	10.3964	10.0229	10.0201	10.0291	10.3528	10.0756	10.0678	10.2165	10.4259	10.1102	10.0352	10.4216	10.5149	10.4299	10.0935	10.1103	10.7818	10.0526	10.54	10.5945	10.3777	10.5824	10.1706	10.4886	9.93274
398	8	80087901	80089033	1132	10.3437	9.93812	10.4222	10.3609	10.3959	10.1426	10.2155	10.2125	10.3636	10.2759	10.014	10.3264	10.1648	9.91825	10.2345	10.3885	10.219	9.40696	10.2926	10.4785	10.3255	10.2476	10.1578	10.0317	10.0765	10.3137	10.0941	9.8384	10.2444	10.2544	10.2717	10.3239	10.418	10.5007	10.4317	10.3426	10.5917	10.3952	10.5001	10.5252	10.4268	10.5423	9.98053	10.4579	10.279
399	8	80089624	80092244	2620	9.58895	10.1126	9.74963	9.71754	9.64066	10.0169	9.80265	9.89225	9.73141	9.64566	10.4602	10.0347	10.0738	10.1546	10.3706	9.69563	10.1633	10.7428	9.55973	9.50644	9.7278	10.0458	10.0133	10.0064	9.55297	10.0032	10.0321	10.262	9.73427	10.03	9.99059	9.72425	10.1151	9.62169	10.0409	10.0166	9.62097	10.1862	9.62621	9.82633	10.111	9.65506	10.4181	9.6348	10.0871
400	8	80263027	80263410	383	10.4372	10.4303	10.3101	10.3203	10.2685	10.2765	10.3707	10.363	10.3243	10.3361	10.346	10.4579	10.4197	10.4671	10.407	10.4703	9.71075	8.51272	10.5209	10.3935	10.3365	10.3083	10.4569	10.4839	10.4871	10.3578	10.4016	9.68342	10.3144	10.4408	10.4065	10.4063	10.0169	10.4066	9.98204	10.0504	9.71679	10.1616	10.3486	10.0001	9.74892	9.87581	9.77682	10.1256	10.2216
401	8	80806213	80834051	27838	10.3333	10.0608	10.0054	10.4342	10.4196	10.0345	10.3178	10.3353	10.3297	10.3775	9.6166	10.025	10.0365	10.0238	9.65092	9.9934	9.99268	9.99017	10.302	10.3725	10.3335	9.98051	9.96258	9.99249	10.0021	9.62706	9.59216	10.2732	10.3756	10.0549	10.0395	10.3475	10.04	10.2268	10.0239	9.96337	10.483	9.98385	10.0073	10.0474	9.63766	10.4061	9.93252	10.2743	10.0209
402	8	86886841	86904371	17530	9.77128	10.5477	10.1618	9.80143	10.133	10.5828	10.1858	10.2158	10.5778	10.6052	10.0857	10.532	10.0981	10.1259	10.5124	10.1081	9.78407	10.0874	10.0824	10.5572	9.86107	10.1116	10.5826	10.0625	10.1747	10.0907	10.0459	10.6329	10.5925	10.1004	10.0928	10.1365	9.77942	10.2616	10.5481	10.5896	9.69146	10.1043	9.67268	10.5397	10.0854	10.4845	10.0449	10.0526	10.1398
403	8	98500773	98502741	1968	9.51686	10.5774	10.554	10.6403	10.6826	10.0055	9.51249	9.97695	10.5656	10.0055	10.0353	10.0457	9.45428	10.009	10.5818	10.5615	10.0224	10.6906	10.0289	10.0369	10.6039	9.92535	10.5911	9.56623	9.95503	9.93232	10.0481	9.83351	9.98595	9.99778	9.53698	10.0247	10.2175	10.6678	10.1062	10.712	9.70379	10.7264	10.1769	10.7284	10.9408	10.1302	10.0808	10.1037	10.5986
404	8	99022008	99032230	10222	9.95548	10.7415	10.818	10.6393	10.6605	10.2568	9.93802	10.2383	10.6565	9.86706	9.88192	10.2606	9.81863	10.3428	10.0176	10.7972	10.289	10.2767	10.2456	10.204	10.7098	10.2938	10.8113	9.81541	9.91984	10.1851	10.1637	10.3391	10.2537	10.1794	9.88697	9.83914	10.2516	10.7845	10.2466	10.3912	9.84541	10.2959	10.1686	10.3465	10.7837	10.2886	9.84047	10.2778	10.3853
405	8	99036252	99037492	1240	10.3701	9.95261	9.99322	9.85207	9.93267	10.1945	10.3875	10.1531	9.89243	10.571	10.6367	10.1221	10.4007	10.2279	10.7156	9.74646	10.1004	10.4116	10.0726	10.2649	9.73169	10.149	9.82759	10.4563	10.6478	10.1128	10.2697	10.1351	10.1638	10.2535	10.4342	10.5523	10.0885	9.89603	10.1816	10.3657	10.4471	10.0854	10.1303	10.4265	9.98453	10.2008	10.5449	10.2546	10.1524
406	8	117488656	117647628	158972	9.79332	10.406	10.3426	10.3733	9.79952	10.3469	10.3339	10.3333	10.3353	10.3428	10.3679	10.3683	10.3638	10.379	10.3834	10.3641	10.332	10.354	10.3914	10.3582	9.80655	10.343	9.82299	10.3723	10.3677	10.3661	10.3867	10.3435	10.3631	10.3597	10.339	10.3879	10.3861	10.4197	10.3286	10.356	10.3206	10.3726	10.3656	10.3319	10.2886	10.3365	10.4099	10.3923	10.3663
407	8	124603535	124616409	12874	9.21848	9.13839	9.23857	9.68035	9.13644	9.74358	9.21478	9.95941	9.28717	10.237	9.11363	9.62387	9.60513	10.2019	9.675	9.70456	9.16997	9.03707	9.15282	9.11836	9.1283	9.23025	9.14087	9.13723	9.07756	9.71099	9.70775	9.28917	10.1351	9.14669	9.18976	9.69442	9.04573	9.20534	9.62864	9.18759	9.01288	9.68409	9.12584	9.17517	9.52246	9.56318	9.18864	9.61436	9.42588
408	9	17303897	17358876	54979	10.051	10.3574	9.98681	10.4497	10.4003	9.93069	10.4452	10.0966	9.99503	10.0061	10.4333	10.0015	10.0092	10.4852	10.0505	9.99347	10.0656	10.4529	10.412	10.4075	10.0502	9.97651	10.4914	10.4084	10.3472	9.9537	10.4221	9.99181	10.404	9.96733	9.93092	9.9903	10.0156	9.91036	9.97614	10.015	10.6776	9.96184	10.3978	10.0722	10.5842	9.93202	10.4171	10.379	9.98351
409	9	24281885	24282276	391	9.96965	9.33539	9.38143	10.1062	9.36295	9.42051	9.41139	9.61384	10.0808	9.33115	9.93528	9.84911	10.4734	9.22722	9.2511	9.44558	9.96727	9.19963	9.30853	9.24105	9.39299	9.29826	9.27011	9.90825	9.93318	9.37958	9.182	9.46514	9.38807	10.0124	10.0102	9.91524	9.15105	9.31122	9.38823	10.0931	10.5413	9.38405	9.20595	10.5932	10.6101	9.36699	9.32676	9.9264	10.1923
410	9	35652844	35929172	276328	10.5548	10.4317	10.3886	10.8209	10.8177	10.7242	10.9731	10.346	10.4667	10.5159	10.5413	10.5439	10.7856	10.4988	10.4176	10.3895	10.4102	10.4537	10.7422	11.0517	10.4061	10.4206	10.7567	10.4856	10.3886	10.4957	10.7985	10.3924	10.4125	10.5117	10.5006	10.5214	10.3724	10.401	10.3901	10.5192	10.5601	10.4718	10.5819	10.5663	10.8339	10.858	10.4002	10.5095	10.6894
411	9	37086445	37086843	398	10.7603	10.9073	10.8057	10.891	10.9892	10.8695	10.7324	10.803	10.7448	10.9236	10.8758	10.9195	10.9767	10.8861	10.7506	10.8664	10.9093	10.8776	10.8768	10.8908	10.802	10.8901	11.0102	10.8715	10.8835	10.7797	10.8806	10.815	10.8511	10.9023	10.8561	10.8265	9.60413	10.6532	9.87067	10.0245	9.44327	10.42	10.795	10.0107	9.39431	9.91331	10.7327	10.2011	10.4414
412	9	38126083	38141452	15369	10.7355	10.8407	11.1618	11.2508	11.2744	11.1957	11.2063	10.8242	10.7463	11.2559	11.2531	10.8015	11.3194	10.4763	11.0133	11.2046	10.7886	11.311	10.7639	10.76	10.9739	11.2059	10.8119	11.2189	10.7815	10.7717	10.7707	10.9807	11.0208	10.7659	10.7847	11.2839	10.9405	10.9195	11.2171	10.8071	11.3405	10.7977	11.3406	10.9137	11.386	10.5547	11.2586	11.1832	10.6836
413	9	38480102	38488311	8209	10.7154	10.7129	10.5029	10.4301	9.92712	10.466	10.782	10.5103	10.882	10.8516	10.4013	10.7694	9.66717	10.7791	10.8992	10.5069	10.8429	9.64806	10.4217	10.7444	10.8581	10.4904	10.4087	9.80318	10.3318	10.8178	10.2903	10.8451	10.8209	10.4556	10.808	10.8108	10.4167	10.795	10.5715	10.939	10.5138	10.4139	10.3841	10.5775	9.95729	10.909	10.3463	9.90823	10.8471
414	9	39149141	39234634	85493	9.97062	10.4935	9.96705	10.4769	9.98307	10.4111	10.3925	10.0079	10.3848	10.3999	9.95962	10.4955	10.4734	10.4354	10.469	9.94811	10.4751	9.96009	10.4508	10.5252	10.505	10.4487	10.4649	9.89414	9.97044	10.3997	10.4311	9.95611	10.4133	9.94984	10.4114	10.4416	9.84947	10.4574	9.9596	10.4828	9.88509	10.4453	10.4895	9.96437	9.94603	10.5279	9.90024	9.94947	10.4151
415	9	48364375	48368373	3998	10.3999	10.3443	10.8436	10.2441	10.3322	10.2722	10.83	10.1158	10.8648	10.8263	11.0184	10.2957	10.9191	9.42136	10.8105	10.7361	10.8245	10.9147	10.4222	10.9204	10.8023	10.8088	10.294	10.989	10.3281	10.8205	10.3416	10.7451	10.905	9.49328	10.3503	9.52502	10.8573	10.8869	10.8493	10.7964	10.2666	10.715	10.9443	10.7874	10.904	10.3013	10.8487	9.56668	10.5803
416	9	49959080	49978944	19864	9.74071	10.6387	10.582	10.6807	10.634	10.0876	10.0854	10.5675	10.6325	10.0838	9.71681	10.6489	10.0441	10.0471	10.0669	10.026	10.6476	10.046	10.6481	9.92427	9.75679	9.84101	10.0225	10.0573	10.6587	10.0327	10.0448	10.5418	10.1272	10.6886	10.6505	10.6575	10.1177	10.6645	10.6589	10.702	10.7012	9.91954	10.6896	10.706	10.1188	10.0384	10.5928	10.6267	10.6487
417	9	83521018	83522534	1516	10.6524	9.5543	9.72947	10.5727	11.0725	10.5881	10.5952	10.6198	10.6267	10.5453	10.6674	9.56742	9.54711	10.579	10.5921	10.5044	9.57943	9.53403	9.58046	9.62093	9.70099	10.5587	10.5878	10.532	10.4754	10.564	10.5555	10.5725	9.5824	10.5689	10.616	9.58008	10.441	9.63685	10.3947	10.2781	10.1842	9.65781	10.578	9.57215	10.2328	9.65152	9.57367	9.68339	11.0795
418	9	88476937	88499227	22290	10.6291	10.6855	10.5371	10.617	10.6327	10.5396	10.6072	10.5466	10.5535	10.6235	10.7073	10.7271	10.7492	10.3074	10.7017	10.292	10.6453	10.7149	10.6386	10.3389	10.2379	10.575	10.6125	9.77579	10.6986	10.6316	10.7083	10.6227	10.6409	10.2625	10.5459	10.642	10.7404	10.6781	10.308	10.6647	10.7504	10.6033	10.7265	10.2755	10.7445	10.7407	10.6975	10.6966	10.5696
419	9	103355461	103358235	2774	10.196	10.3254	9.80853	9.76738	9.77287	10.1976	10.2169	9.06625	8.94309	9.73851	9.74783	9.6813	8.68009	9.72586	8.8302	10.1457	10.136	9.66369	9.68871	9.68257	10.1435	8.87838	9.63142	9.78379	9.66681	10.228	10.2169	8.96881	9.80363	9.77668	10.2496	9.74168	10.429	10.1489	9.81668	9.71066	9.94151	9.71201	8.99379	8.95099	9.93026	9.818	9.69504	9.81606	9.82666
420	9	113721718	113722368	650	10.0783	10.7676	10.9538	10.7467	10.6745	10.0723	11.1208	10.9333	10.015	10.7442	11.1806	9.97972	9.98924	11.255	9.92934	10.6469	10.0716	10.6902	10.7215	9.99858	10.7495	10.212	11.1707	10.7374	10.1038	10.6861	11.144	10.6722	11.0939	11.133	10.021	10.705	10.1228	11.1568	10.7567	10.7766	10.8001	11.1359	10.0207	10.8147	10.729	10.1315	10.854	10.7294	10.6848
421	9	114756414	114766671	10257	10.0985	10.2437	10.2054	10.6077	10.2572	10.1914	10.2606	10.1601	10.4976	10.3027	10.264	10.1869	10.6469	10.5719	10.169	10.2302	10.5244	10.2689	10.2324	10.271	10.183	10.2162	10.217	10.2279	10.2083	10.2149	10.6718	10.2459	10.2241	10.1679	10.2138	10.2663	9.77828	10.2041	10.024	9.85517	9.51697	10.1296	10.1997	10.5332	9.84325	10.0568	10.5681	10.0829	10.1212
422	9	114814094	114815852	1758	11.1659	10.2902	11.3748	11.3188	11.0186	11.424	11.1709	10.4685	11.3392	11.1552	11.1003	11.2718	11.2486	11.2726	11.157	10.9834	11.2513	10.9408	11.3857	11.3848	10.933	11.2678	10.1619	11.0299	11.3766	10.3883	11.3342	11.0544	11.2372	10.8331	11.2609	11.176	10.3562	10.4013	11.1077	11.2302	10.8264	11.225	11.1331	11.3275	11.1644	11.3949	11.3231	11.4065	11.292
423	9	118476311	118491621	15310	10.8851	10.9912	11.0023	10.5052	10.9231	10.7941	11.0874	10.2482	10.8419	10.9101	10.461	10.9926	10.9868	11.1958	10.4565	10.8465	10.8684	11.0019	10.4547	10.4588	10.8435	10.8969	11.227	10.4958	11.1938	10.3997	11.2279	10.8551	10.9471	10.9564	10.8775	10.9514	10.4717	10.4602	10.8201	10.8707	10.979	10.3394	11.2361	10.4166	10.4617	10.9116	11.1123	11.0466	10.6113
424	10	7534475	7534653	178	10.818	9.54627	10.7065	9.59893	9.59881	9.73182	10.8619	9.69171	9.54486	9.54177	9.53622	9.55463	9.66992	9.76639	9.5806	9.74381	9.72135	9.68396	9.65947	10.826	10.7693	9.80894	9.7529	9.61222	9.67967	9.55628	9.67685	10.8473	9.59194	10.8647	9.74703	9.73927	9.57428	9.47874	9.59197	9.64826	9.62183	9.54096	9.53745	10.9571	9.54952	9.58547	9.47529	9.51689	9.57483
425	10	9122767	9150853	28086	10.5238	10.6181	10.6745	10.6375	10.6342	10.5677	10.64	10.5139	10.5206	10.5732	10.5469	10.5307	10.5641	10.5339	10.609	10.5156	10.5274	10.64	10.4871	10.616	10.8949	10.5585	10.5511	10.8633	10.8682	10.6014	10.5073	10.9128	10.5187	10.917	10.5101	10.5256	10.2493	10.8994	10.3652	10.3948	10.0005	10.4053	10.5192	10.7106	10.3104	10.7811	10.6074	10.3695	10.4482
426	10	12334301	12334411	110	10.4797	10.565	9.95725	8.99469	8.83151	9.97503	10.4124	10.4255	9.94392	10.5305	10.6082	10.0388	10.6143	10.5367	10.0172	10.4411	10.5428	9.99042	10.455	10.4998	10.0256	10.0014	10.0174	8.74328	8.81103	8.84394	10.101	8.73265	10.3826	8.73862	10.5425	10.4817	9.79509	8.78079	9.90357	8.72231	9.75829	10.4155	10.4564	8.84436	9.6707	8.77913	9.95783	9.88647	9.76795
427	10	15272668	15281790	9122	10.3518	10.7816	10.4055	10.8533	10.8521	10.7224	9.28647	10.2377	10.9298	10.2381	10.2987	10.4376	10.9653	10.8736	10.2638	9.30726	10.8587	10.3041	9.27069	10.3754	10.776	10.8894	9.2932	10.782	10.7906	10.3552	10.3366	10.2236	9.36094	10.2654	10.3053	9.41495	9.15198	9.13973	10.9128	11.0159	11.1292	10.9885	10.8283	10.4946	11.1788	9.40062	10.8308	10.4618	10.7302
428	10	15385518	15432971	47453	10.2526	10.3406	10.2144	10.3434	10.2798	10.2063	9.66986	9.61398	10.3941	10.0956	10.218	10.2845	10.5791	10.5322	10.1388	9.71686	10.4767	10.3571	9.71177	9.71516	9.95763	10.5091	9.72527	9.90503	9.96297	10.138	9.64462	9.59783	9.65107	9.71653	10.1796	9.63986	9.25998	9.65688	10.1576	9.90146	10.4596	10.3738	10.6144	10.2482	10.2045	9.70395	10.2843	10.0841	9.98359
429	10	20924226	20938033	13807	10.4163	10.7206	10.5996	10.4327	10.4332	10.249	10.6669	10.3574	10.279	10.663	10.6473	10.3344	10.4831	10.527	10.6859	10.8239	10.4774	10.7502	10.7399	10.685	10.6816	10.42	10.4997	10.6872	10.3772	10.4567	10.9535	10.3535	10.6305	10.6448	10.7133	10.3204	9.80166	10.5489	10.6169	10.4289	9.64921	10.2227	10.3543	9.98711	9.51945	10.3623	10.7855	10.1781	10.3836
430	10	21769739	22093887	324148	10.7548	10.6217	10.627	10.7303	10.7175	10.7107	10.5979	10.6151	10.6415	10.4814	10.5554	10.8046	10.8511	10.8115	10.5586	10.4846	10.8204	10.5053	10.6434	10.8205	10.4636	10.8331	10.7862	10.5516	10.8017	10.787	10.411	10.7086	10.7406	10.528	10.8298	10.7986	10.8893	10.7908	9.93849	10.532	10.7885	10.6487	10.7955	10.7296	10.8129	10.8251	10.7715	10.7866	10.8048
431	10	24369091	24369167	76	10.2856	10.2356	8.72482	10.4119	10.323	10.0526	10.742	8.82632	10.1641	10.8259	10.8318	10.8533	8.7874	10.6929	10.7635	10.1413	10.6036	10.7765	10.6151	10.1754	8.77986	10.2448	8.72023	10.3276	10.865	10.5162	10.8365	8.803	10.7652	8.76502	10.1171	10.1125	10.886	10.6	10.4838	9.9631	10.1297	8.71713	10.709	10.1945	10.263	8.74157	10.4824	9.87243	9.80961
432	10	27471662	27497089	25427	10.5758	10.65	10.5312	10.5842	10.6331	10.64	10.597	10.6127	10.5917	10.6393	10.6913	10.66	10.6033	10.6685	10.6386	10.6086	10.5999	10.5744	10.6843	10.6892	10.6133	10.5474	10.631	10.6758	10.6591	10.6431	10.6224	10.6007	10.6316	10.6046	10.6054	10.6345	9.921	10.5135	10.1796	10.0942	9.87888	10.3165	10.596	10.1176	9.63166	10.1418	10.5914	10.3135	10.4804
433	10	44430245	44548182	117937	9.92625	10.4356	10.4275	10.0358	10.4629	9.98611	10.0202	10.0562	10.4099	10.4993	10.0265	10.4043	9.98553	10.4392	9.98657	10.3888	9.99042	10.4628	10.4603	9.80988	9.99722	10.0671	10.4528	10.4875	10.0683	10.4584	10.2543	10.4554	10.0208	10.1536	10.0691	10.4803	10.0484	10.5071	10.2375	9.98616	10.078	10.4527	10.2071	10.5078	10.5123	10.0594	10.4735	10.5076	9.92011
434	10	53563604	53572451	8847	10.2832	10.4204	10.2464	10.4818	10.5372	10.3492	10.4144	10.1743	10.3334	10.468	10.5488	10.4637	10.0817	10.3669	10.4246	10.2969	10.325	10.4829	10.3045	10.5006	10.3686	10.3934	10.3794	10.4787	10.438	10.4426	10.5672	10.2967	10.4015	10.4935	10.0067	10.4816	10.5691	10.4109	10.3925	10.3767	10.4377	10.3644	10.5813	10.5901	10.468	10.5902	10.4963	10.4417	10.2419
435	10	54019992	54044971	24979	9.97461	10.0414	10.0466	9.70731	10.0736	10.005	10.0653	10.0312	9.99814	10.0684	10.0933	10.1304	9.75286	10.1368	10.0017	10.0582	10.0799	10.0975	9.79303	10.0673	10.0795	9.81944	10.0779	10.1345	10.1144	10.0264	10.1043	10.0019	9.71253	10.0805	9.71952	9.63834	10.0517	9.91551	9.97776	9.9303	10.0528	9.9689	10.0887	9.91048	10.0401	10.0619	9.94196	9.99048	9.93792
436	10	55530107	55533033	2926	10.8462	10.9323	10.9423	10.1703	10.9132	10.9509	10.8101	10.8225	10.9277	10.7621	10.7964	10.8604	10.1878	10.7989	10.9084	10.9866	10.917	10.8782	10.2503	10.8176	10.9472	10.2458	10.9313	10.9134	10.8741	10.8602	10.8232	10.899	10.2985	10.819	10.2748	10.2833	10.6906	10.7887	10.7467	10.8069	10.892	10.7146	10.6708	10.8905	10.8911	10.8807	10.7929	10.7778	10.7021
437	10	61300867	61301038	171	10.9482	9.57219	9.44322	11.563	11.0165	9.51566	9.56427	9.55077	9.546	10.9904	11.0499	9.56584	9.68875	9.65132	9.65244	9.60708	9.69903	9.66596	10.9166	10.8954	10.9431	11.3893	9.59233	9.73403	9.57739	9.58607	9.49404	10.9394	10.9298	9.69985	9.70436	10.9523	9.3805	9.53988	10.8662	9.66181	10.9225	9.71701	11.161	11.0105	10.6894	9.59959	9.4638	9.37831	10.9017
438	10	64959612	64965464	5852	10.2634	10.2717	10.2928	10.2275	10.2367	10.2966	10.3018	10.3653	9.63253	10.2952	9.57526	10.379	10.39	10.4292	10.3254	9.65774	10.2776	10.2917	10.2934	10.2817	10.2419	10.294	10.2766	10.3021	10.2021	10.2922	10.2641	10.2918	9.54512	10.2642	10.2093	10.2188	10.2729	10.3139	10.262	10.3199	9.78946	9.50127	10.2013	9.58902	10.5488	10.3352	10.2552	10.2174	9.5034
439	10	65108691	65113379	4688	10.7008	10.6043	10.5901	10.6968	10.5807	10.5016	10.6821	10.5256	10.3359	10.5578	10.3719	10.6655	10.7538	10.6516	10.6548	10.3033	10.6981	10.7176	10.5403	10.6872	10.6089	10.6669	10.6114	10.5582	10.5524	10.6135	10.5845	10.5443	10.3932	10.7553	10.6685	10.6196	10.9292	10.5735	10.7624	10.8165	10.8128	10.4092	10.6505	10.5621	11.1398	10.8466	10.5847	10.678	10.2448
440	10	65208081	65240478	32397	10.6299	10.6781	10.5827	10.6101	10.6906	10.698	10.5293	10.5922	10.0594	10.5984	10.0901	10.6826	10.7011	10.6254	10.5679	10.1113	10.5833	10.618	10.6025	10.7209	10.6682	10.6768	10.6703	10.669	10.6794	10.5772	10.5742	10.5832	10.0937	10.6525	10.572	10.606	10.5496	10.6244	10.6298	10.5003	10.2614	10.1458	10.6018	10.0724	10.7991	10.7586	10.5653	10.6068	9.99218
441	10	70494361	70494548	187	10.1147	10.7124	10.7038	8.97959	10.0378	10.688	10.6727	10.7069	10.1644	10.0372	10.0651	10.7711	10.0023	10.7161	10.7045	10.7582	10.0888	10.7346	10.109	10.0543	10.7108	10.0646	9.98332	10.1989	10.7547	9.15257	10.1711	10.1167	10.046	10.6528	10.7591	9.04645	11.0505	10.0691	10.2092	10.8569	10.8254	10.1719	9.90985	10.7206	8.89222	10.7531	10.7933	10.0865	10.6458
442	10	72164250	72231618	67368	10.7178	10.7992	10.3685	10.5607	10.7596	10.4461	10.6844	10.7049	10.6516	10.9978	11.042	10.8764	10.5846	10.9842	10.877	10.7656	10.8845	10.9282	10.4888	10.7447	10.4471	10.4562	11.0373	10.9059	10.7256	10.6706	10.7468	10.5624	10.792	10.5203	10.6407	10.7214	11.4325	10.8481	11.2893	10.7732	11.4106	11.0517	10.8771	11.3315	11.0275	11.3398	10.866	10.9553	10.8725
443	10	73046724	73090099	43375	9.86803	9.82281	10.2577	10.2988	9.82452	10.3311	9.76126	9.93182	9.86028	9.40423	9.28112	9.84588	10.382	9.46857	9.5175	9.94288	9.56228	9.75663	10.363	9.80042	10.2919	10.3242	9.47539	9.41671	9.90868	9.87351	9.82582	10.3964	9.93049	10.3533	9.84994	9.84919	9.24042	9.88341	9.36949	10.225	9.27276	9.74939	9.80011	9.46474	9.93733	9.37095	9.35467	9.75745	9.92152
444	10	87785880	87786384	504	10.7585	10.1955	10.6866	10.7434	10.7499	10.5727	10.261	10.4899	10.5822	10.6724	10.2653	10.3661	10.3152	10.7192	10.8091	10.4974	10.733	10.8949	10.8037	10.2297	10.6236	10.6781	10.7429	10.2889	10.6794	10.7572	10.7818	10.5264	10.7004	10.6838	10.6657	10.3043	10.8794	10.7158	10.2329	10.62	10.8208	10.6936	10.7662	10.6593	10.8223	9.29549	10.6632	10.7132	10.6204
445	10	99340365	99364548	24183	10.6945	10.5789	11.0221	10.3788	10.3531	10.3236	10.6913	10.4221	10.3122	10.3461	10.6267	11.0785	10.1871	10.6649	10.2001	10.7339	11.0588	10.192	10.6204	10.3136	10.445	10.6998	11.0946	10.9956	10.9316	10.2918	10.1116	10.4686	10.6939	10.2523	10.2401	10.3274	10.6781	10.0782	10.6755	10.1704	10.5961	10.6426	11.0353	11.1309	10.2227	10.6891	10.5387	10.6294	10.7363
446	10	103379190	103397024	17834	10.7805	10.5762	10.5366	10.7723	10.724	10.7182	10.5284	10.758	10.7079	10.5576	10.5592	10.4143	10.5166	10.7876	10.7669	10.7601	10.4679	10.7674	10.7083	10.7279	10.7564	10.6025	10.7905	10.5169	10.5691	10.7368	10.7749	10.7981	10.7422	10.7437	10.7466	10.4795	9.69216	10.3748	9.99858	10.3333	9.6861	10.2518	10.4365	10.1099	9.96851	10.0082	10.4989	10.3971	10.6917
447	10	103726788	103890930	164142	10.375	10.0789	10.2995	10.4436	10.4456	10.3567	10.4009	10.3827	10.4013	10.4448	10.2132	10.0694	10.0854	10.4795	10.4177	10.4561	10.1081	10.4665	10.4376	10.4707	10.4245	10.0995	10.4774	10.0713	10.0971	10.4503	10.4359	10.4532	10.4901	10.4699	10.4173	10.1171	9.91619	10.3667	10.0485	10.4385	10.1416	10.0751	9.99976	10.1313	10.4945	10.1002	9.97848	10.3933	10.3558
448	10	109341525	109363075	21550	11.021	11.0169	10.9503	10.1322	10.0865	10.4566	10.4373	10.8708	10.4389	10.4366	10.4913	11.0432	10.5219	10.5308	10.9422	11.0029	10.9665	10.9766	10.1418	10.4917	10.9447	10.5017	10.4765	11.0141	10.1444	10.499	10.4677	10.3959	10.9812	10.4487	10.9751	10.9703	10.0587	10.4634	10.1267	10.3198	10.5709	10.8181	10.9099	10.7708	10.6117	10.2757	10.9615	10.1419	10.8886
449	10	111372429	111375473	3044	10.2982	10.5187	10.6796	10.1507	10.1998	10.6319	10.6236	10.3691	10.6411	9.40563	10.1377	10.5396	9.20658	10.2827	10.6798	10.694	10.6349	10.5514	10.2393	10.1881	10.6597	10.2839	10.2395	10.6067	9.37836	10.2684	10.1831	10.5891	10.2333	10.1287	10.2446	10.2626	10.7952	10.3229	10.3606	10.7159	10.6882	10.8008	10.6285	10.707	10.4868	10.6432	10.6904	9.48855	11.0129
450	10	115399439	115404360	4921	9.98496	10.1316	9.92769	10.1505	10.1757	9.98751	10.4048	10.3283	10.5109	9.60525	10.5769	10.1519	9.65783	10.0002	9.89816	10.504	10.5015	10.733	10.0807	9.48188	10.0152	9.60714	9.67775	10.0171	9.51521	10.5314	10.0853	10.5234	10.4847	10.1038	10.0678	9.57571	10.1569	9.66003	10.1481	9.74209	10.3331	10.0594	10.2266	10.749	10.3565	10.2688	9.65037	10.1385	10.1059
451	10	117614479	117746451	131972	10.6472	10.7459	10.7089	10.0511	10.0278	10.6325	10.7071	10.1217	10.4462	10.376	10.7341	10.7363	10.3658	10.376	10.6556	10.3753	10.4107	10.679	10.0493	10.7233	10.6198	10.4332	10.4162	10.7454	10.4482	10.7214	10.0268	9.96732	10.2997	10.3901	10.3664	10.4391	10.4876	10.462	10.7795	10.7141	10.7361	10.6619	10.3952	10.6574	10.7469	10.7654	10.4596	10.4497	10.7508
452	10	123514580	123514754	174	11.1271	8.13148	10.4609	11.2783	11.1147	10.9981	10.2371	10.9194	10.987	11.0145	11.2757	11.205	10.3983	10.3073	8.20117	10.9394	10.2562	11.1675	11.054	10.3752	10.2164	10.3773	11.1697	11.0627	11.1166	11.0874	11.1931	10.9837	11.1665	11.0685	10.3238	10.3143	11.1407	11.2574	10.457	11.1707	11.5547	11.259	11.4231	11.447	10.7854	11.485	11.3568	10.5648	10.2788
453	10	126303572	126304575	1003	9.67982	9.99203	9.92337	9.85956	10.0395	9.82855	9.9588	10.1205	9.96954	10.0481	10.253	10.1858	9.9255	9.80342	9.84512	10.0415	9.6369	10.0876	10.1196	9.46739	10.2212	9.72236	10.2134	9.7995	9.82172	10.1197	10.2479	10.3768	10.2584	9.91349	9.87284	9.82379	10.0594	8.79367	9.97132	9.9215	8.47045	10.2818	9.293	9.16287	8.52356	9.81361	9.18778	9.95292	9.26225
454	10	126764978	126765568	590	9.37553	9.46652	9.3173	9.4285	9.43961	9.44285	10.0115	9.98366	9.3968	9.38775	10.096	10.0578	9.34971	9.36259	9.99935	9.98177	9.31881	9.37959	10.044	9.4032	10.0778	9.40864	10.0723	9.3271	10.0944	10.0238	9.39721	10.3263	10.0051	10.0372	9.29892	9.42537	10.0189	9.35439	9.9978	9.92338	9.31023	9.9678	9.38788	9.35247	9.33574	9.97524	9.36409	9.94111	9.34106
455	10	129849758	129883067	33309	10.5414	10.3275	10.2678	10.2438	10.2909	10.3237	10.5318	10.2847	10.3059	10.273	10.2427	10.2231	10.2599	9.55723	10.2581	10.664	10.6278	10.2613	10.727	10.6108	10.585	10.5623	10.5993	10.5576	10.6545	10.6195	10.2081	10.6554	10.5675	10.3018	9.58987	10.6438	10.2925	10.6009	10.3477	10.4409	10.1678	10.4781	10.572	10.377	10.1863	10.1178	9.66415	10.1541	10.5104
456	11	3416276	3416511	235	10.158	10.5992	9.60757	10.0114	10.0696	10.0428	9.48806	10.4365	9.59869	10.3732	9.45592	9.33249	10.4008	10.2112	9.39358	10.0568	9.40334	10.364	9.9401	10.4171	10.4543	10.3949	10.4679	10.0923	10.1429	9.50788	9.96947	10.5684	10.0902	10.2632	9.96095	9.93885	10.052	10.0891	10.3511	10.0449	9.86804	9.4282	10.3998	9.94822	9.99011	9.44255	10.1116	10.4257	9.78395
457	11	21397151	21398878	1727	8.47253	8.49189	8.44385	8.49597	9.25706	8.52141	8.45637	8.52612	8.42569	9.03126	9.53275	9.28682	8.31224	8.35236	8.33088	8.34023	8.33858	8.3161	8.42775	8.47471	8.34488	9.10052	9.1639	8.37862	8.36284	9.03123	8.45722	9.00895	9.40488	8.30964	8.34573	8.41961	8.41359	8.43462	8.6161	8.32955	8.43528	9.19355	9.25454	8.44973	9.1328	9.21895	9.43394	9.32096	8.55902
458	11	22235060	22253961	18901	10.8288	10.8535	10.8167	10.8888	10.8307	10.8003	10.7764	10.8268	10.7684	10.6367	10.3864	10.3039	10.8077	10.7661	10.3136	10.7449	10.7735	10.8047	10.7162	10.805	10.8374	10.4495	10.2758	10.7868	10.8522	10.5972	10.7566	10.6616	10.4333	10.801	10.8355	10.7511	10.6953	10.7301	10.7279	10.6903	10.7012	10.3097	10.3129	10.6951	10.4863	10.3061	10.8327	10.764	10.7632
459	11	29035527	29037126	1599	9.4495	9.48132	9.40198	9.43163	9.39063	9.44884	9.47004	9.49455	10.1506	9.39353	10.3921	10.3296	10.4063	9.60477	9.43383	9.38188	9.48088	10.6604	9.50586	10.2405	9.35215	10.2327	10.2711	9.46702	10.35	9.41484	9.39966	9.51003	10.4534	10.5415	10.2328	9.45273	10.2162	10.2135	10.1213	9.31463	10.697	10.1359	9.39422	9.45108	9.43851	10.1519	9.3992	9.42497	9.9779
460	11	29170076	29217510	47434	10.1939	10.4294	10.1441	10.4273	10.1547	10.4285	10.4394	10.4444	9.93662	10.4431	9.98147	9.68507	10.0066	10.487	10.1737	10.1329	10.5056	9.86427	10.4654	9.91822	10.4229	9.81103	9.91911	10.511	9.89135	10.5508	10.1829	10.3942	9.92819	9.89434	9.97105	10.5263	10.1818	9.76894	9.77566	10.4745	10.2762	9.81405	10.0606	10.1004	10.7477	9.78839	10.5283	10.4911	9.93789
461	11	32188750	32201707	12957	10.4132	9.72302	9.76622	9.9514	9.94561	10.3407	10.0222	9.96724	9.61814	9.54635	9.99649	9.74237	10.3684	10.0125	9.66109	10.3247	10.0954	10.0214	10.3381	10.1588	10.0582	9.627	9.98984	10.0676	9.97057	10.0399	10.1086	9.57281	9.76783	9.53311	10.0062	10.0925	9.72933	9.8211	10.4577	10.4232	10.7629	9.86927	10.0528	10.161	9.90411	9.90557	9.71139	9.87909	10.0334
462	11	33113226	33113486	260	10.1622	9.07839	9.83547	10.0911	9.7468	10.1062	9.78153	9.88537	9.7453	9.73507	9.71456	9.09441	10.2402	9.75881	9.76991	10.3056	10.1037	9.05604	10.1879	9.82335	10.0141	9.7308	9.79138	9.78938	9.82787	10.2175	10.0754	10.1391	9.19829	9.74193	9.693	9.78108	9.37877	9.81229	9.64806	10.2158	8.94418	9.71059	10.2644	10.0784	9.4161	9.06099	10.3479	9.07076	9.94533
463	11	33359372	33375067	15695	10.606	9.15285	10.0786	10.5485	10.0537	10.5707	10.1114	10.0577	9.98689	10.0506	10.0178	9.02603	10.5577	10.1042	10.1814	10.6684	10.6403	9.02834	10.5115	9.99855	10.6038	10.0778	10.113	10.0624	10.0686	10.5453	10.487	10.5795	9.22983	10.0507	10.1122	10.0918	9.92671	10.1039	9.94216	10.5796	9.06832	10.0296	10.5058	10.4983	9.83561	9.25526	10.5981	9.20202	10.1606
464	11	33520397	33534591	14194	10.7751	10.0657	10.7175	10.7616	10.4319	10.7091	10.4138	10.3721	10.4539	10.4388	10.469	10.1746	10.8065	10.4543	10.4646	10.7536	10.789	10.1632	10.824	10.5276	10.7918	10.4677	10.4962	10.5427	10.4885	10.7486	10.8052	10.7324	9.99092	10.4736	10.4026	10.483	10.5089	10.5006	10.4538	10.7584	10.0422	10.4461	10.8406	10.7164	10.4364	10.1259	10.7912	10.1234	10.3897
465	11	35243687	35260436	16749	10.4774	10.3785	10.1714	10.0326	10.7406	10.4944	10.4347	10.1543	10.4777	10.4136	10.3213	10.3406	9.92091	10.4822	10.7026	10.43	10.3204	10.3594	10.458	10.3374	10.1071	10.04	9.89821	10.3502	10.401	10.4303	9.88031	10.5084	9.92122	9.88859	9.88636	9.90173	9.90938	10.4209	10.5236	10.4271	9.75396	10.0338	10.2579	10.839	9.83673	10.455	9.8979	10.0106	10.6517
466	11	40938197	40942448	4251	9.87348	9.31144	10.2937	9.80566	10.437	9.77574	10.4669	10.0456	10.0749	9.35359	10.1452	10.5075	10.2371	10.285	10.0349	10.0329	10.2882	9.41085	10.3335	9.62516	9.41212	10.4847	9.78953	9.86874	9.30842	9.81099	10.2905	9.66659	10.2897	9.54196	9.37275	9.32215	10.0177	10.2826	10.2712	9.70848	9.63793	9.5215	8.55727	10.2133	9.67941	10.4602	8.80221	9.96385	10.3858
467	11	41644605	41644707	102	8.3301	9.78966	10.4636	8.23135	10.5817	10.425	10.4754	8.27965	8.1786	9.67874	9.72688	10.581	10.5145	9.76977	8.09162	9.73693	9.66446	9.86938	9.77548	10.565	9.74821	10.4492	9.80567	8.10717	9.72691	9.63871	10.5312	10.3862	9.85485	9.84478	9.82724	9.58718	8.06896	9.66457	9.4099	10.2605	9.95398	10.1933	10.4313	9.6874	9.28368	10.373	10.321	8.04561	10.0205
468	11	45592572	45593461	889	10.3364	9.75544	10.3245	10.4801	10.4188	10.2209	10.3458	9.68505	10.1952	10.2716	10.4221	10.7565	10.4267	9.97397	9.82819	10.3953	9.89809	10.4866	10.2795	10.4445	10.5923	10.3127	10.6724	10.362	9.71408	10.3119	10.4254	10.4024	10.6788	10.3826	9.57208	9.87065	9.66413	10.4176	10.5941	10.585	10.4367	10.5716	10.5131	9.93731	9.72984	10.7393	10.46	8.80745	10.3481
469	11	46482581	46488864	6283	10.0756	9.51908	9.43351	10.0977	9.57234	9.53944	9.997	9.42092	9.984	10.0243	9.56779	8.68176	9.63873	10.0496	10.1047	9.52398	9.49697	10.142	9.72114	10.0611	10.0024	9.94455	10.1636	10.0995	10.024	9.60154	10.0323	9.42341	9.53135	9.65473	9.63408	10.0931	10.1568	10.0141	9.60874	8.67857	10.1649	8.7724	9.52352	9.58205	9.58533	8.78618	9.96612	10.0508	9.42537
470	11	47002461	47007067	4606	10.9942	10.9101	11.1046	10.9858	10.9947	11.0283	11.0124	10.527	11.0753	11.0295	10.9058	10.9046	10.9572	10.9918	10.9798	11.0255	10.9651	11.0163	10.9044	10.9065	11.0439	11.0174	11.0069	11.007	10.9364	10.955	10.957	10.9839	11.0009	10.898	11.0242	10.9962	10.9199	11.023	10.9566	10.9335	10.8166	11.0798	10.9581	10.9483	10.1264	10.9175	10.9953	10.9464	10.4282
471	11	48851297	48886868	35571	10.1404	10.0522	10.1841	10.1288	9.67203	9.62705	10.3454	9.66969	10.0831	10.111	10.0626	10.1663	10.1195	10.4258	9.56771	9.57417	10.1451	10.1414	9.58994	10.3637	10.1473	10.3401	10.1361	10.1423	10.1794	10.1284	10.1586	9.67707	10.1801	10.012	10.1705	10.3493	10.6045	10.5462	10.3166	10.3578	10.5326	9.67827	10.0479	9.78387	10.6236	10.308	10.2896	10.5	10.2928
472	11	59279699	59279901	202	10.7613	11.348	11.2991	11.1165	11.2903	11.3944	11.3265	11.2105	11.2475	11.3134	11.177	11.2823	11.3595	10.8148	11.1964	10.8548	11.2163	8.81395	11.2758	10.7305	11.2244	11.4074	11.3022	11.2606	11.2042	11.3094	11.2765	11.3613	11.2261	11.2887	11.2853	11.2466	10.2268	11.302	10.9997	11.1687	10.7883	11.0516	11.1057	11.0574	10.8026	11.0138	11.3087	11.1229	11.3522
473	11	60139991	60140876	885	10.277	11.1125	11.0605	11.1674	11.1598	11.0877	10.9911	10.9224	10.9717	11.0016	11.087	11.0563	11.0669	10.3617	11.0459	10.3088	11.0392	8.29697	11.0243	10.2503	11.043	11.0493	11.0217	10.9651	10.9825	11.0328	11.1697	10.8155	10.8988	11.0711	10.5616	11.069	10.4738	10.8958	11.0543	10.9772	11.0152	11.0694	11.117	11.0974	11.2385	11.2351	10.9506	11.0673	10.8026
474	11	62217314	62234630	17316	10.4967	10.5476	10.4793	10.6797	10.6029	10.5936	10.2094	10.4569	10.4356	10.5959	10.2662	10.6963	10.2655	10.527	10.5395	10.5415	10.7811	10.6667	10.6817	10.2359	10.6549	10.2385	10.2828	10.5403	10.6418	10.2308	10.6076	10.5356	10.3214	10.227	10.2865	10.2496	10.2524	10.5791	10.2588	10.8359	10.3978	10.2351	10.596	10.3049	10.5556	10.7937	10.5264	10.2883	10.1581
475	11	64416011	64432150	16139	10.8455	10.1382	10.9501	9.30699	9.2564	10.8229	10.8573	10.456	10.9151	10.3526	10.1114	10.7622	10.2793	10.8563	10.3267	10.3511	10.9218	10.1376	10.8713	10.2232	10.8212	10.253	10.8843	10.7984	10.1948	10.3756	10.2098	10.3399	10.7836	10.3071	10.854	10.2962	10.8044	10.9305	10.8949	10.9433	10.8408	10.9224	10.7798	10.8738	10.8643	10.7812	10.3162	10.3405	10.9928
476	11	70974623	71017152	42529	9.60874	10.5581	9.4599	9.44064	9.41743	10.1922	9.40304	9.52976	9.65306	10.1553	9.56342	10.3681	9.6019	9.61398	9.3963	9.45433	9.64467	9.38835	10.2243	9.37079	10.2157	9.45411	9.38975	9.36578	10.1818	10.3012	9.40712	10.1774	9.63267	10.3288	9.62771	10.3345	10.2436	9.59738	9.45241	10.1791	10.3328	9.61555	10.3348	10.5653	9.64239	10.3253	10.1592	9.64189	10.2751
477	11	73070371	73074216	3845	9.17533	10.3062	10.3266	10.2806	10.2807	10.3078	10.647	10.0254	10.382	10.3281	9.9602	10.0387	10.3888	9.9772	10.3751	10.3532	10.0249	10.3915	10.2349	10.0833	10.3429	10.3395	10.4505	10.3355	10.3519	9.9857	10.5673	10.6283	10.2658	9.92853	10.3613	10.3227	10.8542	10.3867	10.6238	10.4059	10.4334	10.4414	10.4903	10.4664	10.474	9.94841	10.2919	10.3031	10.2137
478	11	73503033	73598632	95599	10.2995	10.3134	10.2475	10.3471	10.1773	10.219	10.2654	10.1533	10.2418	10.3151	10.306	10.3871	10.395	10.2873	10.2931	10.3278	10.3263	10.2386	10.3018	10.3194	10.2594	10.2117	10.3066	10.3302	10.2829	10.2915	10.3915	10.3171	10.3502	10.3235	10.3064	10.2802	10.1824	10.2869	10.3852	10.2431	10.3665	10.2767	10.3272	10.3532	10.4086	10.4187	10.2893	10.2659	10.1697
479	11	91182491	91224527	42036	10.398	9.77894	10.1738	9.8945	10.3656	9.84563	9.71771	10.1692	10.1438	10.4046	10.3755	10.1241	9.75637	9.75909	10.1277	10.3145	10.1665	10.09	10.049	10.1639	10.1718	10.493	10.3549	10.15	10.1377	10.3856	10.1881	10.158	10.231	10.1259	9.81644	10.1662	9.77022	9.69841	9.7273	9.75851	10.283	10.1677	9.77231	10.2209	10.3743	10.1413	10.1059	10.5327	10.1012
480	11	91549365	91640179	90814	10.5378	10.5102	10.5231	10.4445	10.0945	10.3673	10.5055	10.2697	10.3997	10.3866	10.3131	10.3024	10.5072	10.6133	10.4226	10.4758	10.5516	10.5114	10.549	10.5646	10.4507	10.1499	10.4925	10.4305	10.2896	10.2771	10.4362	10.6188	10.4418	10.4681	10.378	10.4322	10.4128	10.3492	10.6597	10.5969	10.1226	10.4211	10.4141	10.3713	10.6219	10.4826	10.5656	10.0673	10.4255
481	11	99948025	99948032	7	11.3579	11.1911	10.685	9.43521	9.53774	10.7941	10.7547	11.4031	11.2272	11.2274	11.2686	11.3337	11.2408	11.421	10.7657	11.3617	11.4197	11.3889	11.405	11.2607	11.193	10.6811	11.4362	11.457	10.6218	11.2515	9.6648	10.6271	11.3106	11.2118	10.5875	11.2586	11.4291	11.6916	11.4228	9.54212	9.40239	10.8156	10.6888	10.6248	11.2815	10.6841	10.883	11.3613	11.3314
482	11	112741985	112742345	360	10.6356	10.4264	8.48285	10.6319	9.60695	10.5534	10.6209	8.43271	10.5596	10.5809	10.6725	9.57388	10.6364	10.6936	10.7519	8.34257	8.24419	10.5961	10.5552	9.61881	8.4002	9.53279	9.57931	9.6128	8.30214	10.6316	8.38436	10.4788	8.26265	10.686	8.24403	10.5036	9.67782	9.65668	9.60362	10.5818	8.17415	9.67959	9.71802	9.69595	10.492	9.6321	8.30883	10.6712	8.56906
483	11	116602360	116630414	28054	10.2757	9.7389	9.86359	9.799	10.0668	10.0886	10.0793	9.91687	10.2789	10.0625	10.0681	10.0393	10.0069	10.2597	10.0411	10.8342	10.0392	9.66128	10.265	9.73609	9.7936	10.0509	9.68396	10.1012	10.0586	10.4418	10.1178	10.0762	10.0629	9.7794	10.0657	9.8052	9.70854	10.1485	10.1239	10.2943	9.7479	9.8217	9.76395	9.8202	10.0872	10.1451	10.0976	10.1697	10.333
484	11	120870358	120888586	18228	9.6795	10.2244	10.3302	10.58	10.5747	9.69176	10.2329	9.79123	9.66738	9.60068	10.627	10.2422	9.46969	9.54708	9.60762	10.5835	10.2246	10.2477	10.6491	9.54813	10.5589	10.6369	10.5533	10.2508	10.6008	10.5855	10.258	10.2707	10.2003	10.2333	9.55939	10.585	10.6437	10.2993	10.6195	10.1895	10.1932	10.2999	10.1469	10.1727	10.5434	10.5938	10.2049	10.3224	10.6614
485	11	121303097	121310264	7167	9.49795	10.0609	9.91314	10.3512	9.96448	9.44847	9.95034	9.86316	9.51659	9.45703	10.0034	10.052	9.42455	9.4886	9.48388	10.3154	10.0451	10.0968	10.4234	9.50811	10.4173	10.4072	10.4614	9.45319	10.4758	9.50962	10.0805	9.88209	10.0152	10.0132	9.47557	10.0658	10.5171	9.99827	9.89536	9.36172	10.0105	9.95546	9.87721	9.96416	10.3397	9.90723	9.91756	9.42452	10.3088
486	12	11545659	11610212	64553	8.95183	9.78521	9.0315	9.84018	8.86848	9.91424	8.89326	9.16492	10.3226	9.8271	9.82871	9.84735	8.73761	9.79923	9.91841	9.85572	10.4273	8.6976	8.89515	9.80091	9.85421	8.92443	8.76356	8.77235	8.85344	9.87412	8.80975	9.0197	8.86352	8.77056	8.87038	8.80591	8.73652	9.86688	8.89115	9.8606	8.76496	8.8813	10.3629	8.86858	8.83659	9.86929	9.79571	8.88622	9.90197
487	12	15689452	15691335	1883	9.4518	9.76894	10.2837	10.3005	9.52282	10.8852	10.2947	9.37165	10.9157	10.2902	10.9476	10.2671	9.50281	10.8942	10.2855	10.8875	10.2835	10.3378	10.3986	10.2649	10.3527	10.2567	10.3478	9.30725	10.8926	10.3557	11.0421	9.44721	10.6998	9.79681	10.9475	10.3361	10.4276	9.52156	9.56045	10.9842	10.5439	10.4331	11.0759	11.0954	9.6955	10.4218	10.3423	10.9634	10.885
488	12	18193095	18552020	358925	10.479	10.466	10.8377	10.8795	10.8669	10.8105	10.7785	10.5684	10.4165	10.4515	10.8084	10.5859	10.3956	10.7621	10.796	10.7398	10.7139	10.4407	11.0215	10.4322	10.7727	10.8291	10.4221	10.4279	10.801	10.4769	11.1292	10.421	10.4059	10.3872	10.769	10.4801	11.0309	10.4409	10.6358	11.0568	10.4788	10.9883	10.4816	10.5083	10.5466	10.5613	10.8131	10.6968	10.4565
489	12	28320295	28349039	28744	8.75277	10.4832	9.91061	10.5231	9.84375	10.3658	10.4869	10.3342	10.4969	10.4994	10.3344	10.4935	9.92017	10.3308	10.5464	10.5162	10.5362	9.9182	10.4782	10.2853	10.5106	9.95249	10.4576	10.3392	10.3794	10.3541	10.3288	10.2854	10.2961	10.4873	10.2484	10.2853	10.3422	10.2843	10.3356	10.4689	9.90612	10.3265	10.4689	10.361	10.3044	10.4785	10.3187	10.3794	10.3698
490	12	29152942	29155139	2197	10.8175	9.99291	10.6812	10.7538	10.7527	10.0551	10.7053	9.90433	10.6517	10.7275	10.834	10.7845	10.7279	10.5738	10.735	10.5604	10.6472	10.8555	10.7067	10.1831	10.7056	10.5757	10.6692	10.7354	10.5725	10.7437	10.7692	10.4856	10.7389	10.0932	10.7552	10.7784	10.9827	9.91901	10.8217	9.95348	10.917	9.90736	10.0861	10.1789	10.9448	10.0962	10.6175	10.7896	9.90412
491	12	30667058	30671688	4630	10.4693	10.4509	10.4816	10.449	10.4496	9.93714	10.4672	10.4275	10.4841	10.4374	10.1534	10.23	10.1753	10.1963	10.4738	10.4848	10.4866	10.4656	10.228	10.2523	10.218	10.4797	10.2606	10.2335	10.1966	10.4582	10.2102	10.433	10.4468	10.485	10.1667	10.224	10.608	10.1798	10.4626	9.91388	10.5508	10.4689	10.134	10.4436	10.1622	10.4509	10.466	10.4413	10.1644
492	12	32849195	32849548	353	10.5252	10.3801	9.48199	9.41475	9.44321	10.5152	10.6239	10.4529	9.50683	9.43703	9.55995	9.49106	10.6948	9.44143	11.3206	9.45408	9.43807	9.39324	10.6126	11.304	11.369	9.4908	11.3692	11.3636	10.3427	10.6315	9.48339	10.498	9.35572	10.7832	10.6243	11.3027	11.7978	11.311	11.4812	10.814	8.88453	11.3416	9.43846	10.7874	11.5617	10.8198	11.2891	11.0818	9.16767
493	12	33508991	33511756	2765	10.4567	10.5042	9.93982	10.0084	9.95713	10.3705	10.4201	10.1599	9.92544	9.95127	10.0427	10.0284	10.4968	9.98163	10.7928	9.95548	10.4721	10.0086	10.416	10.8703	10.7345	10.0506	10.8201	10.8789	10.4545	10.4135	10.0737	10.4107	10.0195	10.4915	10.328	10.8309	10.8473	10.8014	10.7784	10.4495	10.1034	10.7251	9.95452	10.4975	10.979	10.565	10.8188	10.5135	9.79961
494	12	38175763	38194460	18697	9.76226	9.90347	10.4617	10.5295	10.5645	10.5146	10.5964	10.4237	10.5545	10.5872	9.90955	10.5219	10.6564	10.6118	9.83553	9.88734	9.84346	9.85017	9.82517	10.5933	10.5119	10.6348	10.6393	10.5857	10.6248	9.41331	10.532	10.5649	10.599	9.84935	10.5794	10.535	9.65559	9.70931	9.48335	10.4838	10.5449	9.78084	10.5761	10.5692	10.5946	9.84155	9.78731	10.4542	10.3386
495	12	49411350	49474614	63264	10.06	10.4678	10.2303	10.181	10.3267	10.265	10.0367	10.2347	10.3201	10.4253	10.4276	10.4828	10.1245	10.3872	10.2172	10.1326	10.4176	10.172	10.4018	10.233	10.087	10.2389	10.1391	10.0014	10.3244	10.3594	10.1021	10.4695	10.3462	10.4787	10.267	10.3703	10.3407	9.99063	10.5317	10.5296	10.3169	10.3125	10.0151	10.346	10.4399	10.7609	9.99588	10.1453	10.2947
496	12	50509608	50895726	386118	10.3853	10.4666	10.3465	10.4464	10.4572	10.3938	10.3672	10.3213	10.3995	10.4426	10.4632	10.5038	10.4466	10.4567	10.4156	10.3936	10.4207	10.3986	10.447	10.4246	10.4106	10.4058	10.3901	10.3885	10.4461	10.4399	10.3912	10.427	10.4426	10.4818	10.3989	10.462	10.3476	10.3538	10.4324	10.4289	9.84816	10.3837	10.4318	10.473	10.4564	10.5159	10.3932	10.3417	10.3686
497	12	57140406	57157776	17370	10.7553	10.7958	9.97134	10.2756	10.7366	10.7386	9.94958	10.2711	10.6655	10.7353	10.2443	9.8876	9.90677	10.2526	10.2325	10.3058	10.307	10.7696	10.272	9.88203	10.2886	10.2793	10.7589	10.2369	9.96589	10.7524	9.91103	10.2801	10.3462	10.751	10.2693	9.94209	10.6483	10.6752	10.1591	10.7029	10.1201	10.6762	9.88174	10.2428	10.1602	9.86343	10.2264	10.6685	10.2749
498	12	57366059	57387621	21562	10.2471	10.2338	9.3723	9.6887	10.113	10.1869	9.30597	9.76103	10.1222	10.1663	9.6782	9.26183	9.28395	9.74682	9.72457	9.76991	9.79679	10.1058	9.72269	9.28269	9.68312	9.83178	10.221	9.71736	9.32756	10.204	9.23884	9.77536	9.61723	10.1532	9.68097	9.25984	10.0845	10.2777	9.65135	10.2803	9.63475	10.1633	9.30608	9.64176	9.56457	9.23545	9.78416	10.1832	9.77315
499	12	60477871	60593624	115753	10.0205	10.3678	10.29	10.0551	10.3375	10.653	10.0611	10.4967	10.5101	10.0708	10.594	10.3635	10.5477	10.0545	10.2701	10.2575	10.6469	10.5325	10.5171	10.6704	10.4128	10.0961	10.083	10.5269	10.5615	10.6325	10.059	10.3573	10.327	10.2647	10.5424	10.5745	9.88849	10.3139	9.97579	10.5703	9.83864	10.311	10.0763	10.2218	10.2041	10.3187	10.3604	10.0088	10.0914
500	12	63970065	63970552	487	9.98655	9.91571	10.4296	9.67731	9.76213	10.3813	10.0136	9.90242	9.80245	10.0109	10.2919	9.90968	10.5727	10.5682	10.5019	10.4701	9.81409	10.3561	9.0279	9.79185	9.7493	9.08857	10.5476	9.72966	10.3847	10.2049	10.4462	9.8489	10.5475	10.3459	9.87078	8.95078	9.32798	9.81623	10.1563	10.1043	10.2169	9.05411	8.80158	10.1337	9.61718	9.63037	8.99852	9.78806	9.76661
501	12	64045150	64099191	54041	10.2868	10.3107	10.5597	10.2681	10.2144	10.5258	10.2135	10.1323	10.162	10.283	10.7039	10.3411	10.7103	10.7304	10.625	10.6906	10.2055	10.726	9.70424	10.6557	10.2373	9.75604	10.6646	10.2785	10.6878	10.3888	10.6525	10.2729	10.6152	10.7113	10.1641	9.73892	10.2011	10.2289	10.5858	10.7147	10.7556	9.77141	9.86849	10.6969	10.3275	10.2149	9.7294	10.1594	9.92089
502	12	66669557	66671717	2160	10.1229	9.32959	9.43817	10.2489	10.1837	10.1493	9.32148	9.43804	9.32323	9.28076	10.1552	10.2095	10.3495	10.1746	10.7259	10.3022	10.2088	10.8169	10.2121	9.17781	10.2453	10.1945	10.2034	9.12262	10.2105	10.0821	10.6711	9.33731	10.7575	10.1978	9.20165	9.21304	9.19221	9.15342	10.6636	10.18	10.2036	9.2788	9.06233	10.6803	9.31727	10.7875	9.19584	9.96318	9.31882
503	12	68607278	68622771	15493	10.1875	9.28827	9.43518	10.1171	10.1179	10.1948	9.37134	9.45024	9.40759	9.31662	10.1291	10.1266	10.1558	10.0915	10.6466	10.2135	10.1246	10.7278	10.0878	9.36656	10.1247	10.1657	10.1518	9.3746	10.1306	9.41899	10.6265	9.42561	10.6152	10.0644	9.32934	9.32761	9.32708	9.47245	10.1941	10.1482	10.2204	9.36174	9.41995	10.656	9.46169	10.7341	9.42676	10.1188	9.43867
504	12	69722650	69722675	25	9.63371	10.647	10.4187	8.2154	8.1439	9.77556	10.424	10.4089	9.64819	10.4949	8.21029	9.83681	9.88477	9.66727	8.26473	8.30172	10.4866	9.67812	9.64926	10.5791	9.82722	9.67209	9.62166	10.5264	9.86603	9.64689	8.18084	10.5942	9.65107	10.5174	10.4049	10.2409	9.88005	10.501	9.75867	9.75251	9.80257	10.265	10.5132	9.71084	10.4629	8.30938	10.5157	9.66504	10.5719
505	12	75478580	75484124	5544	9.13955	10.268	10.1064	10.3206	10.3077	10.2437	10.2731	9.84448	10.3094	9.13169	10.4155	9.92391	10.0716	9.97954	9.91671	10.3065	10.3189	9.1196	9.95251	9.76835	10.3502	10.3201	10.271	9.76114	9.99601	10.2175	10.3144	10.3719	9.9791	9.98987	9.18066	10.2098	9.83075	9.92566	10.1032	10.2744	10.2068	10.15	9.89099	9.86356	10.1897	10.2519	10.3632	10.178	10.1197
506	12	75965852	75973713	7861	11.0205	11.2659	11.0238	10.5183	10.6343	9.82041	10.5219	10.5057	9.75818	11.1851	9.40088	10.567	9.58322	10.485	11.1707	10.649	10.5475	11.2192	11.1695	10.6596	10.5984	11.1343	10.5917	11.2984	9.58844	10.596	9.58562	10.82	10.7172	11.2326	9.56981	9.65688	10.2602	10.7653	10.4973	10.0492	10.0765	10.5772	11.128	10.9887	10.2149	10.2804	9.84876	9.85785	10.5967
507	12	77072190	77074593	2403	10.927	11.0414	11.0032	10.3281	10.3841	10.3737	10.3881	10.3791	10.3508	9.31431	10.3713	9.12229	9.27364	9.20968	10.9947	10.3883	10.2595	11.0535	10.3038	11.0366	11.0049	11.0136	10.2994	10.3011	9.29234	10.3451	9.24474	11.028	11.0788	10.9808	10.4446	10.4603	10.3889	11.067	10.9453	10.2892	10.2901	10.9911	10.8833	10.9837	11.0144	10.2184	10.2661	10.2689	10.3307
508	12	77397670	77403999	6329	10.9195	10.249	10.7025	10.2827	10.2405	10.9287	10.7086	10.3475	10.7256	10.315	10.91	10.2591	10.3207	10.3509	10.9628	10.9483	10.3436	10.8667	10.666	10.2401	10.9129	10.3226	10.2747	10.2416	10.2815	10.6629	10.2452	10.3047	10.9539	10.6438	10.3247	10.713	11.0316	10.3308	10.7563	11.0065	10.297	10.3065	10.6833	10.9593	10.291	10.264	10.2813	10.7414	10.3341
509	12	85202936	85230001	27065	10.6226	10.5911	10.5654	10.6251	10.6819	10.2205	10.6627	10.3087	10.5239	10.5913	10.3219	10.7155	10.6275	10.5843	10.5997	10.3618	10.5417	10.2773	10.5404	10.3016	10.1611	10.1513	10.6363	10.5811	10.6059	10.6374	10.749	10.3297	10.5637	10.6369	10.5455	10.2789	10.2367	10.525	10.2763	10.5684	10.7448	9.43796	10.8688	10.7296	10.8185	10.731	10.6537	10.7732	10.093
510	12	89139185	89415572	276387	10.3998	10.5752	10.6008	10.4863	10.4753	10.4649	10.411	10.4428	10.3878	10.8358	10.8792	10.32	10.76	10.4863	10.4628	10.7721	10.3369	10.7642	10.3745	10.7995	10.4618	10.5304	10.4629	10.8053	10.8382	10.5429	10.427	10.5269	10.38	10.4971	10.7282	10.4313	10.758	10.4828	10.761	10.7524	10.2836	10.8541	10.3873	10.4183	10.7779	10.4419	10.7873	10.5508	10.581
511	12	93121761	93132845	11084	10.5077	10.4389	9.98271	10.5233	10.5299	10.0138	9.97114	9.89522	10.4856	9.54104	10.4611	10.0172	9.49035	9.55893	10.48	9.93504	10.4433	10.4987	10.4411	9.94961	10.0063	9.94949	10.4212	9.9562	9.52692	10.5025	9.52303	9.94576	10.486	10.0142	10.032	9.50437	9.63407	10.4762	10.5468	10.0576	10.2396	10.4467	10.4638	10.0986	10.0915	10.0839	9.98161	10.509	10.4626
512	12	94915259	94917313	2054	10.7463	10.6995	10.0829	10.2327	10.0647	10.2005	10.6809	10.3423	10.6587	10.1829	10.6228	10.3436	9.57569	10.3131	10.5526	10.564	10.6653	10.7011	10.5661	10.4608	10.2114	10.2307	10.7241	10.2279	9.58912	10.436	9.62245	10.4543	10.2182	10.5065	9.72593	10.4446	9.18458	10.8322	10.6356	10.5393	10.112	10.6919	10.8148	10.1867	10.3204	10.2138	10.4281	10.4612	10.5795
513	12	94931070	94939081	8011	10.2292	10.2117	10.1994	10.2923	10.2272	10.3162	9.99812	9.96367	10.0588	10.4472	10.1021	10.435	10.9304	10.4976	9.62781	10.0144	9.99118	9.98697	9.57723	9.83472	10.3926	10.4762	10.1081	10.3021	10.9556	9.67413	10.9313	10.0877	10.4746	9.85007	10.7959	9.83241	10.811	10.0276	10.0331	9.86254	10.4813	10.1885	10.3135	10.3418	9.93108	10.606	10.6412	9.8359	9.90732
514	12	96196196	96223173	26977	10.497	10.5102	10.3271	10.6415	10.6814	10.5083	10.5628	10.3537	10.5999	10.6056	10.5498	10.3374	10.3519	10.3968	10.6483	10.4968	10.6006	10.5381	10.6175	10.4937	10.4425	10.3722	10.619	10.5074	10.3385	10.5721	9.85388	10.5213	10.7137	10.5247	10.5363	10.5386	10.6629	10.4807	10.6092	10.4927	10.4324	10.4716	10.5653	10.3133	10.5672	10.392	10.526	10.4662	10.4921
515	12	96623312	96623586	274	11.0338	11.2241	11.0504	10.4143	10.4222	11.1048	11.0405	10.4133	10.9399	10.9978	11.2629	11.1428	11.2646	11.0326	10.562	10.5334	10.9974	11.1447	9.24361	11.093	11.0527	11.0157	11.0492	11.0288	11.2169	10.5269	11.1838	10.3945	11.1283	11.1975	11.002	10.5555	10.7438	10.9916	11.1665	11.1593	11.3805	11.0443	11.2831	10.7541	11.6775	11.3923	11.3173	11.1404	10.7911
516	12	100077912	100080008	2096	10.3731	9.97488	9.23192	9.10456	9.13634	9.85722	9.86952	9.26942	9.89831	10.4202	10.4803	9.87136	9.14364	9.97264	10.3582	9.18351	9.10804	9.01711	9.89028	9.87758	10.3681	10.3822	9.89449	9.84604	9.9048	10.2857	9.82088	9.94886	9.92487	9.86565	9.11509	9.14299	9.15039	9.93755	10.3944	10.4705	9.93167	10.4034	9.1221	10.5272	9.97002	9.88305	10.5283	10.3862	9.33949
517	12	100214407	100217042	2635	10.9798	10.4335	10.0471	10.4122	10.4054	10.9768	10.9822	10.7936	10.9492	11.0199	11.0046	10.4588	10.4956	10.4675	10.9891	11.0281	11.0022	11.0314	11.0008	10.4497	10.9449	11.0189	10.4	11.1107	10.5598	10.9449	9.86971	10.9986	10.4234	10.9955	10.4237	11.0285	10.3706	10.9834	10.9655	11.12	10.9174	10.3992	10.4186	11.0374	10.8103	10.3625	11.0981	11.0236	10.4196
518	12	102582454	102828642	246188	10.3963	10.3926	10.3204	10.4238	10.4105	10.3267	10.3519	10.2634	10.3415	10.3754	10.3933	10.444	9.94567	10.3905	10.2577	10.3605	10.3876	10.4372	10.2814	10.405	10.3763	10.3901	10.4274	10.3495	10.3809	10.2626	10.381	10.2585	10.3813	10.4003	9.9249	10.3678	9.85224	10.3483	10.375	10.3729	10.3709	10.365	10.4395	10.3443	10.4829	10.4699	10.3639	10.3675	10.2849
519	12	110355216	110412139	56923	10.3072	10.2891	10.3634	10.8684	10.8369	10.3213	10.789	10.339	10.7159	10.4207	10.3208	10.8026	10.4841	10.445	10.742	10.4355	10.3943	10.8472	10.4697	10.7485	10.1023	10.4056	10.4518	10.7604	10.4112	10.3695	10.3574	10.844	10.873	10.7809	10.3783	10.8132	10.6993	10.6678	10.7242	10.3018	9.86564	10.6574	9.91613	10.4358	10.8282	10.8645	10.261	10.783	10.3071
520	12	111254016	111287270	33254	10.0326	9.8956	10.1021	9.48178	9.44083	10.0173	10.2909	10.0251	9.54509	9.45626	10.0425	10.0205	9.99617	9.98169	10.0414	9.38412	9.44416	10.1068	9.9125	10.2332	9.99106	9.48057	10.2547	9.95213	9.98691	10.2658	9.96485	9.93638	9.93423	10.0009	10.3373	9.99908	10.5238	10.3497	10.2551	9.86446	10.074	9.45637	9.90933	10.3167	9.41593	9.95616	9.27732	9.98267	10.1831
521	12	112776324	112778081	1757	9.5287	10.1092	10.0176	9.71497	9.68997	9.73893	9.78165	9.85598	10.3485	9.82464	9.78139	9.41677	9.72811	9.59324	9.66227	9.583	9.59606	9.60471	9.73199	9.72274	9.72747	9.8011	9.82943	9.54394	9.57771	9.66127	9.59823	9.7359	10.0252	9.80986	9.71525	9.76539	9.70219	9.5549	9.59857	9.60953	9.55865	9.56313	9.62843	9.69575	9.84679	9.64888	9.64825	9.62033	9.71295
522	12	114835711	114963919	128208	10.4977	10.287	10.504	10.7326	10.7179	10.2798	10.497	10.4606	10.7697	10.5072	10.7295	10.5267	10.9531	10.9194	10.2446	10.7836	10.2439	10.7066	10.7456	10.5467	10.3409	10.5535	10.2267	10.5173	10.2877	10.5482	10.5364	10.2078	10.9112	10.146	10.7014	10.9469	10.5549	10.2062	10.518	10.5328	10.257	9.9897	10.2896	10.9157	10.2397	10.6206	10.5108	10.7091	10.3146
523	12	115034479	115040077	5598	10.3959	10.0057	10.4406	10.4721	10.4444	9.99903	10.3932	10.4529	10.5098	10.4378	10.5512	10.4422	10.1288	10.14	9.94373	9.66733	10.0008	10.6112	10.0225	10.4722	10.0284	10.4779	9.94901	10.4731	10.0347	10.4297	10.4366	10.458	10.1465	10.4611	9.69182	10.1147	10.5219	9.87446	10.4909	10.5194	10.1106	10.58	9.9213	9.66121	10.6796	10.5276	10.345	10.6022	9.92233
524	12	115186599	115379105	192506	10.3375	10.0054	10.3013	10.5727	10.5571	10.0242	10.2976	10.3527	10.5545	10.3106	10.5492	10.3401	10.4061	10.418	9.98546	10.2294	10.3515	10.5943	10.3705	10.3482	10.3451	10.3493	9.99841	10.3436	10.0254	10.3442	10.3243	10.0521	10.4035	10.3065	10.1565	10.4284	10.2392	10.3156	10.3335	10.314	9.90119	10.5287	9.95589	10.1774	10.3069	10.353	10.3399	10.5819	10.0634
525	12	115674340	115700639	26299	10.1237	9.18776	9.95618	10.527	10.5274	9.14734	10.0774	9.93718	10.4534	9.9692	10.6135	10.1503	10.6491	10.5582	9.10645	9.97655	10.1287	10.659	10.1281	10.1176	10.0013	10.0343	9.12703	10.0998	9.2359	10.0773	10.0591	8.94665	10.615	10.027	9.96681	10.5729	10.379	10.098	10.1862	10.1296	9.05886	10.6129	9.28285	10.2358	10.303	10.1756	10.0519	10.7141	9.18255
526	12	115795799	115842787	46988	10.1978	9.64258	10.2053	10.4374	10.4795	9.75775	10.1437	10.2172	10.4367	10.1695	10.4201	10.1624	10.3009	10.3258	9.66377	10.003	10.2157	10.4532	10.163	10.2119	10.2374	10.214	9.63315	10.0898	9.58152	10.2175	10.1108	9.77806	10.3029	10.1592	9.9634	10.316	10.1295	10.0828	10.2419	10.2128	9.59728	10.4281	9.64969	10.0469	10.252	10.2346	10.0651	10.5103	9.82732
527	12	115869496	115975158	105662	10.3742	10.0625	10.3911	10.6405	10.6589	10.0593	10.348	10.2978	10.5359	10.4038	10.643	10.4375	10.6145	10.5739	10.0181	10.2757	10.3713	10.6784	10.4082	10.4201	10.3851	10.4011	10.041	10.4354	10.0908	10.4104	10.4991	9.9957	10.5742	10.4031	10.256	10.6512	10.4274	10.3802	10.3938	10.3738	10.0515	10.5626	10.0829	10.287	10.4823	10.4661	10.3656	10.6623	10.0478
528	12	116056336	116152952	96616	10.0057	9.72496	9.965	10.2652	10.265	9.63908	9.94626	9.85297	10.1143	9.95426	10.2866	10.0363	10.3238	10.2108	9.60449	9.9442	10.0051	10.2859	9.98177	10.059	9.98398	10.0045	9.55711	9.99015	9.70185	10.0147	10.0434	9.6252	10.2154	9.96102	9.87322	10.282	10.0033	9.90485	9.93306	9.90809	9.65216	10.1118	9.73867	10.0511	10.0756	10.11	9.96825	10.2563	9.71391
529	12	116193887	116195061	1174	10.1153	9.43547	10.0084	10.5802	10.6572	9.44657	10.0659	10.0441	10.528	10.0322	10.6	10.0581	10.1959	10.159	9.42936	9.58857	10.0558	10.6129	10.0846	10.131	10.0762	10.0683	9.46437	9.99875	9.35076	10.051	10.0237	9.50543	10.2029	10.0881	9.54956	10.278	10.0774	9.99211	10.137	10.0229	9.32253	10.5247	9.30689	9.68747	10.2216	10.0717	9.99409	10.6583	9.44232
530	12	116359895	116583730	223835	10.2278	9.88193	10.2031	10.5985	10.6331	9.88452	10.1985	10.1383	10.4952	10.2218	10.598	10.2694	10.4864	10.4562	9.83394	10.1787	10.227	10.6195	10.2347	10.287	10.264	10.2476	9.81853	10.2629	9.8597	10.2317	10.3105	9.87145	10.445	10.2343	10.1479	10.5105	10.2549	10.1944	10.2352	10.2267	9.89252	10.5357	9.89974	10.2554	10.3572	10.3596	10.237	10.6093	9.88513
531	12	116745882	117040993	295111	10.2408	10.0807	10.1966	10.429	10.4675	10.0331	10.1532	10.1489	10.3587	10.2298	10.4806	10.2351	10.5983	10.5548	10.0125	10.3537	10.2317	10.4452	10.2563	10.2791	10.2852	10.2506	10.0649	10.2812	10.0413	10.2543	10.302	10.0116	10.5337	10.2374	10.3394	10.6169	10.208	10.1925	10.2237	10.2108	10.0596	10.3623	10.0417	10.4604	10.3268	10.331	10.2512	10.4693	10.0001
532	12	117059447	117200047	140600	10.5512	10.1631	10.5396	10.8376	10.8413	10.1756	10.4993	10.4937	10.7404	10.5408	10.8435	10.5395	10.5109	10.5097	10.129	10.1288	10.5329	10.8439	10.5712	10.5917	10.5932	10.6245	10.093	10.598	10.1706	10.5868	10.6176	10.1685	10.5281	10.5202	10.1089	10.549	10.5589	10.4469	10.5237	10.4768	10.0809	10.7296	10.1116	10.1459	10.689	10.6416	10.5178	10.7893	10.1853
533	12	117219726	117240329	20603	10.1772	9.89683	10.2223	10.5147	10.5008	9.94333	10.1503	10.2581	10.4843	10.2154	10.392	10.0994	10.7681	10.8089	9.87843	10.6174	10.2046	10.4078	10.2576	10.1094	10.3185	10.2564	9.87392	10.0756	9.87912	10.1786	10.0807	10.0232	10.8533	10.0852	10.6061	10.7837	9.94495	9.94654	10.0461	10.1335	9.67886	10.3604	9.7931	10.7349	10.1462	10.1734	10.0465	10.3008	10.078
534	12	117915807	117945526	29719	10.836	10.567	10.3949	10.8588	10.8106	10.0875	10.776	10.3452	10.7786	10.4686	10.8763	10.4977	10.4306	10.3703	10.4303	10.0742	10.4836	10.8753	10.5277	10.881	10.4245	10.4122	10.4305	10.4455	10.0747	10.8469	10.4845	10.4353	10.3869	10.8394	9.99529	10.3733	10.7821	10.8578	10.3673	10.4645	10.7483	10.7618	10.4766	10.3958	10.3308	10.4513	10.4947	10.9002	10.4664
535	13	7649110	7724259	75149	10.5264	10.0072	10.1042	10.0717	10.0359	9.99027	10.085	10.0936	10.0634	10.0818	10.0771	10.5482	10.1452	10.5117	10.0935	10.059	10.0753	10.0387	10.0648	10.5545	10.1048	10.4231	10.0327	9.95607	10.4295	10.5676	10.0211	10.496	10.5992	10.6434	10.6165	10.5911	10.6564	10.0068	10.1157	10.1233	10.8079	10.0754	10.1392	10.2357	10.7744	10.6873	9.95706	10.5421	10.5213
536	13	12573915	12574894	979	9.01795	10.7888	10.508	10.5974	10.7208	10.0775	10.1369	10.0534	9.99975	10.0699	10.6781	10.5682	10.0364	8.91856	10.5794	9.95277	10.449	10.6706	10.6043	10.0597	10.4002	10.4864	8.98847	10.0553	10.5401	10.7188	10.1922	8.99682	9.06168	10.6583	9.00782	9.02638	10.7334	10.1795	10.7092	10.7242	10.1467	10.7058	10.7363	10.6693	10.7087	10.0555	10.633	10.1681	9.30644
537	13	13804037	13805108	1071	10.6857	9.3903	9.4331	9.4734	9.48133	10.1243	10.2336	10.7001	10.2506	10.2354	10.1816	9.26645	10.213	10.7254	10.2096	10.6186	10.1943	10.2096	10.1521	10.2104	10.2729	9.51478	10.8709	10.1147	9.3752	10.1292	10.1545	10.7761	10.8078	10.2144	10.8745	10.8369	10.4227	9.91805	9.39656	9.33895	10.6074	9.99443	9.91394	9.59301	9.43505	9.99231	9.32528	9.82075	10.3997
538	13	13972917	13987506	14589	9.45953	10.54	10.3243	10.3851	10.4793	9.91144	9.86524	9.41115	9.80567	9.87098	9.98993	10.5567	9.90069	9.46245	9.94253	9.52403	9.88156	9.90947	9.90138	10.009	9.88282	10.3482	9.55508	9.94498	10.4919	9.91034	9.97355	9.46853	9.44029	9.87133	9.38774	9.45631	9.41169	9.92025	10.3838	10.4011	9.39254	9.85295	9.94646	10.4724	10.4994	9.933	10.4957	9.92926	9.45003
539	13	15251117	15261775	10658	10.0335	10.1926	10.1178	10.401	10.2524	10.0431	10.1804	9.61194	10.0934	10.033	10.2919	10.3385	10.2139	9.42262	9.83028	9.76559	9.84605	9.76205	9.78316	9.71072	9.67846	10.172	10.2498	10.0429	10.2214	9.78915	10.0487	10.126	10.2682	9.79805	9.68473	10.1975	9.575	10.1795	10.4012	10.409	9.73748	10.067	9.91373	10.5365	10.2187	10.4149	10.3487	9.87585	10.2214
540	13	16433591	16468016	34425	9.98191	10.1443	10.2123	10.5063	10.5275	10.1425	10.4493	10.0202	10.1702	10.176	10.5465	10.5997	10.2702	10.586	10.1253	10.2041	10.2451	10.0862	10.1979	10.5227	10.1102	10.2408	10.5073	10.0644	10.2678	10.0434	10.493	9.91342	9.91652	10.4278	10.1827	9.88258	10.1948	10.073	10.4292	10.1422	10.8883	10.6973	10.2896	10.4851	10.3715	10.3437	10.4212	10.2444	10.055
541	13	17090987	17129337	38350	10.0673	10.563	10.8182	10.8958	10.9307	10.3788	10.5672	10.4993	10.5297	10.6057	10.6539	10.6045	10.5716	10.8385	10.5858	10.7475	10.8206	10.9022	10.8232	10.8812	10.8258	10.8922	10.6262	10.4788	10.725	10.615	10.6173	10.4407	10.5181	10.628	10.4566	10.0676	10.7388	10.54	10.8503	10.8513	11.0395	10.8451	10.8107	10.9522	10.8054	10.5406	10.5188	10.7592	10.3238
542	13	17220681	17226530	5849	11.1317	10.543	11.1323	11.114	11.0905	10.6311	11.0025	10.6081	11.1282	10.5993	11.0044	11.0072	11.0879	9.41859	10.5406	10.6882	10.6945	10.5961	10.6381	11.1078	10.698	11.0875	10.9556	11.1565	11.0444	10.6621	10.9926	11.0819	11.0732	11.0117	10.6545	11.1068	10.6536	11.0502	11.0823	10.5725	9.5148	9.5025	10.6786	11.1081	10.718	11.0559	10.92	10.714	10.9748
543	13	17390746	17391604	858	8.56928	10.4071	10.4796	10.6562	10.631	10.1054	10.5113	10.1768	9.84641	10.188	10.6825	10.6302	9.8523	10.779	10.3895	10.4181	10.4375	10.4968	10.41	10.583	10.4048	10.5842	10.5897	9.96424	10.7036	10.4565	10.7436	9.71567	9.84721	10.5086	10.1184	8.51674	10.4088	9.85307	10.6352	10.3407	10.8964	10.9064	10.3709	10.7999	10.611	9.99186	10.6828	10.581	9.82205
544	13	17574927	17603308	28381	10.7039	10.4665	10.6095	9.75026	9.70891	10.6471	10.4845	10.4856	10.547	10.6761	10.145	10.23	10.1786	10.6429	10.6124	10.5459	10.4926	10.1962	10.1741	10.6965	10.241	10.6327	10.4957	10.5984	10.6378	10.5992	10.5098	10.6222	10.2324	10.5044	10.1777	10.2179	10.3271	10.3844	10.435	9.92973	10.3257	10.5249	10.4185	10.4365	10.3667	9.65612	9.9906	10.3763	10.5872
545	13	18383273	18417107	33834	10.5331	10.3567	10.5348	9.90177	9.95217	10.3629	10.5526	10.5528	10.3622	10.5761	10.2014	10.11	10.1686	10.5877	10.5895	10.5439	10.5307	10.1032	10.1188	10.3946	10.1042	10.6023	10.5464	10.4239	10.5964	10.5953	10.6085	10.3676	10.1642	10.3829	10.1613	10.2975	10.5948	10.4211	10.6768	10.1822	10.7787	10.4537	10.6433	10.6507	10.7817	9.99443	10.1999	10.4477	10.3907
546	13	19273334	19275613	2279	10.0895	9.95062	10.3824	10.4735	10.4497	9.99455	10.4078	10.2846	10.3672	10.432	10.4823	10.5427	10.0885	10.375	10.4802	10.2947	10.4675	10.1436	10.332	10.4789	10.0821	10.3451	10.4282	10.35	10.1603	10.4124	10.3853	10.2642	10.0148	10.4353	10.1367	10.1294	10.6319	10.14	10.7676	10.2878	11.0009	10.7177	10.6047	10.7566	11.0257	10.4337	10.5141	10.6691	10.4287
547	13	22180406	22247428	67022	10.634	10.6837	9.82989	10.6864	10.6389	10.2244	10.2857	10.2026	10.222	9.82044	10.2909	10.2809	10.6959	9.93951	10.2782	9.85892	9.89878	10.3906	10.2551	9.88121	10.5592	10.2832	9.8082	9.84984	10.6268	10.3319	10.3633	10.3173	10.288	10.6831	10.3054	10.6575	9.73751	10.2486	9.75124	10.6098	9.79097	10.282	9.94067	9.89828	9.95766	10.3387	9.74201	10.3003	10.1133
548	13	23653701	23668319	14618	10.1287	10.1213	10.0926	10.0501	10.0272	10.0614	10.0844	9.74994	10.0215	10.1204	10.1628	10.2261	10.1768	9.58815	10.1566	9.83482	9.89522	9.96068	9.9261	9.8963	10.0434	10.099	10.1639	9.91866	10.133	9.8863	10.1564	9.79888	10.1586	10.1589	9.8429	10.1495	10.2468	9.95289	10.2366	10.1972	9.98014	9.90845	9.63947	9.91411	9.70806	10.2525	9.90291	9.92978	10.0618
549	13	25099130	25099212	82	10.5894	10.776	9.86649	10.2235	10.3548	10.4942	9.80331	9.92996	10.5445	10.5231	10.7393	10.6549	10.5823	9.8798	10.6455	8.37245	9.8957	9.67661	9.90001	8.3052	10.54	10.5289	9.85142	9.93381	10.7213	9.96678	9.88609	10.5494	10.5043	10.6109	10.5748	10.6297	9.73404	9.66654	10.067	10.0213	9.49436	9.56391	8.37316	9.20318	8.92987	9.2672	9.80588	10.3263	8.75006
550	13	25542964	25545689	2725	10.7503	10.7995	10.318	10.7826	10.8541	10.7217	10.161	10.2069	10.8242	10.7767	10.7158	10.7269	10.1905	10.2171	10.8334	9.2611	10.2422	10.2307	10.3752	9.05495	10.875	10.7789	10.1923	10.2754	10.8264	10.2606	10.2233	10.7432	10.7509	10.8064	10.231	10.8235	10.8771	10.1104	10.7074	10.2274	10.7461	10.1979	8.96946	10.251	10.2507	10.2387	10.0736	10.7512	9.28023
551	13	26062769	26097780	35011	10.959	10.9117	10.3772	10.9906	10.9141	10.3357	10.287	10.2566	10.7737	10.83	10.895	11.0366	10.882	10.3585	10.3102	10.3832	10.3387	10.4429	10.2966	9.78299	10.8006	10.889	10.3633	9.63776	10.7337	10.3271	10.2648	10.762	10.8019	10.8007	10.6492	10.8345	10.9174	9.78114	10.9321	10.2319	10.4122	10.3883	9.78468	10.4688	10.3812	10.4478	10.3495	10.9937	9.94179
552	13	47103645	47106624	2979	9.24201	9.71872	9.66716	9.88014	9.89364	9.67401	9.68705	10.0106	9.72122	9.12482	9.96277	9.7368	9.99506	9.9862	9.64435	9.28558	9.69046	9.69441	9.71449	9.2105	9.88762	9.64263	9.60334	10.0133	9.94893	9.72844	10.0045	9.99024	9.24027	9.68776	9.7251	9.95349	10.0885	10.0955	9.87767	9.81745	9.25212	10.1326	9.70181	9.7788	9.93245	9.85391	9.68905	9.8048	9.74065
553	13	51435014	51439412	4398	10.3406	10.5978	9.76852	8.9737	8.96918	9.11177	10.3233	9.22371	9.12658	9.75338	8.86768	9.84123	9.00103	9.14338	9.67214	10.387	9.11978	9.59285	9.74611	10.4512	9.61476	9.65816	10.4207	9.71847	9.04171	9.01342	9.94853	9.78097	10.3607	9.67953	9.07495	9.61041	10.4941	9.80117	9.69933	9.74407	9.65823	8.93375	9.81102	9.70984	9.68842	9.80188	9.83744	8.89809	10.4003
554	13	52271399	52275352	3953	10.5741	10.2308	10.2343	10.2298	10.2383	9.81567	9.7943	9.88645	9.78046	10.4792	9.81873	10.7036	10.1068	10.1788	9.78209	10.5338	10.5452	10.3612	10.1323	10.1121	9.84839	9.86956	10.1326	9.82893	9.83218	9.83774	10.0916	9.92219	10.1857	9.86489	10.1854	9.75824	10.9972	10.2637	10.3115	10.316	10.4612	10.0919	10.2365	10.4533	10.4066	10.791	10.099	10.0495	10.2823
555	13	65478774	66913713	1434939	10.7901	10.8022	10.9805	10.9967	11.1035	10.9489	11.0685	10.8557	11.049	10.7486	10.4762	10.6815	10.9388	11.1084	10.5013	11.1018	10.4728	10.8762	10.5103	11.1412	10.96	10.564	10.7372	10.8929	10.9678	10.9789	11.0138	11.1579	10.9412	10.8808	10.9211	10.9484	10.9335	10.8266	10.8994	11.0027	11.0377	10.9796	10.8317	11.0421	11.0448	10.5591	10.4652	11.1945	10.5188
556	13	67635961	67639652	3691	10.3209	10.3554	10.8366	10.9271	10.3343	10.885	10.8771	10.743	10.7902	10.2923	10.9809	10.4073	10.4262	10.3619	10.8697	10.3974	10.85	10.8791	10.7788	10.2769	10.8162	10.8881	10.312	10.8958	10.9688	10.7708	10.8939	9.28332	10.3293	10.8628	10.332	10.8388	10.8558	10.8198	10.7934	10.1998	10.2597	10.2869	10.4656	10.8621	10.7608	10.3203	10.9249	9.19486	10.2632
557	13	70109094	70129981	20887	10.2606	10.1808	9.94415	10.2479	10.1736	9.98098	9.34655	10.0331	9.83589	10.1184	10.1637	10.231	10.176	10.1323	10.2048	9.82937	10.205	9.90468	10.2449	10.019	9.82292	10.2197	10.1892	10.2026	10.1628	9.88678	9.73944	10.1398	10.174	10.2234	9.89253	10.1811	9.9483	10.0963	9.95311	9.97081	9.87191	10.3106	10.2569	9.88909	10.2228	10.0631	10.3014	10.3172	10.0952
558	13	70444536	70451412	6876	10.7074	10.3241	10.4429	10.4175	10.3977	10.3706	10.2525	10.4639	10.3179	10.1032	10.3409	10.6616	10.3262	10.6401	10.4421	10.4263	10.427	10.3055	10.4769	10.3484	10.3917	10.4367	10.6371	10.4011	10.3783	10.4805	10.0355	10.6497	10.668	10.6682	10.4223	10.4319	10.4568	10.4131	10.1967	10.4586	9.89382	10.4609	10.293	10.3786	10.2963	10.3495	9.97033	10.7391	10.5416
559	13	71170616	71187686	17070	9.3427	9.30458	9.49703	9.2372	9.43433	9.49615	10.3185	9.76915	10.1607	9.26845	9.17061	9.1651	9.57096	9.70716	9.1481	10.2043	9.46764	9.10148	9.3336	9.53535	9.39544	9.1683	9.63958	9.47781	9.47273	9.34139	9.01629	9.44835	9.44731	9.40026	9.3879	9.60154	9.39268	9.2802	10.1037	9.40046	9.29694	9.4317	9.09402	9.50155	9.41121	9.29018	9.3059	9.7984	9.69982
560	13	73527064	73546036	18972	10.3984	9.77973	10.4414	10.8953	10.5677	10.6566	10.3757	10.4469	10.6199	10.5296	10.7894	10.3545	10.3755	10.3991	10.6968	10.4108	10.6375	9.60738	10.2966	10.3152	10.5957	10.6887	10.5496	10.644	10.845	10.4775	10.6539	10.6338	10.3743	10.8578	9.68263	10.7241	10.8872	10.5887	10.7107	10.5164	10.497	10.395	10.3132	10.715	10.4458	10.3882	10.8183	10.3826	10.424
561	13	73546675	73574553	27878	10.0813	10.5788	10.1954	10.2461	10.0881	9.96122	10.1074	10.2194	9.96302	10.1557	10.0813	9.8584	9.96777	9.98873	10.029	10.0341	10.0745	10.4423	10.0095	10.0004	9.80139	10.1362	9.86679	9.90838	10.2453	10.175	9.80405	9.96793	10.0559	10.1395	10.5617	10.2171	10.0895	9.76756	9.89271	9.83045	10.0281	10.015	9.96087	9.99628	9.94667	9.94908	10.1952	10.0497	10.1879
562	13	74876460	74877016	556	9.73825	8.59059	9.75406	10.4729	9.68865	9.72509	9.81035	9.64064	9.64983	9.78203	10.5462	9.82492	9.74979	9.79977	10.4281	9.75574	10.4418	8.55253	9.77823	9.8239	10.3345	10.394	9.75206	9.69	10.6109	9.70689	9.70833	10.3161	9.70106	10.4963	8.55808	10.3656	10.1559	10.5011	10.1895	9.71312	9.43792	9.49666	9.76429	10.4321	9.45177	9.6113	10.5295	9.64584	9.65797
563	13	87580492	87732309	151817	10.1198	10.1703	10.0554	10.297	10.1375	10.179	10.1901	10.3538	10.0385	10.2611	10.5422	10.3017	10.3633	10.2634	10.0653	10.0949	10.5001	10.1192	10.0521	10.2633	10.2304	10.2438	10.254	10.0728	10.505	10.1986	10.2455	10.1071	10.1077	10.1323	10.0843	10.2002	9.57763	9.99375	9.98215	10.1011	9.82484	10.087	10.16	10.1783	10.0714	10.1273	10.4146	10.0334	9.90033
564	13	95862954	95864309	1355	10.8113	11.0031	10.6874	9.81749	10.2253	10.8164	10.8029	10.1988	10.708	10.1345	10.2336	9.72381	10.1746	10.9436	10.2111	10.8699	9.79495	10.8846	10.9133	10.9049	10.2258	9.81156	10.2606	10.9343	9.81909	10.1827	10.9552	10.9365	10.2551	10.1444	10.935	10.8291	11.1978	10.7401	10.8195	10.8439	11.1073	10.6513	10.8436	10.0515	11.0656	10.274	9.63575	10.7678	10.0426
565	13	101131358	101185606	54248	10.9551	10.9441	10.6547	10.9982	10.6883	10.908	10.9089	10.5251	10.8457	10.6295	10.6448	10.9694	10.7586	10.391	10.9482	10.6293	10.6483	10.7346	10.9095	10.6696	10.9426	10.9321	10.6418	10.9439	10.9724	10.6772	10.4341	10.8349	10.6135	10.7298	10.7159	10.3588	10.9812	10.62	10.6611	10.8933	10.6896	10.5965	10.9861	10.9544	10.958	10.6846	10.9442	10.7275	10.7817
566	13	101744103	101745478	1375	10.5143	9.86051	10.5138	10.4293	9.65209	9.78585	10.6194	9.85177	9.94406	9.8183	9.77739	10.5791	10.6515	10.7164	10.5694	9.95004	10.0261	10.4818	10.5007	9.84335	10.5842	10.6773	10.0465	9.74382	10.5866	10.383	10.5126	10.6552	9.87146	10.6103	10.4659	9.73324	9.72624	9.99818	10.6125	10.0013	9.88534	9.79278	10.6504	10.6543	9.91192	9.80702	10.7892	10.6463	10.6426
567	13	104201097	104203640	2543	10.6123	10.976	10.8457	11.035	11.098	10.7024	10.8053	11.2149	11.2802	11.0669	10.9536	9.69199	11.0975	10.8128	10.6849	11.0472	11.1114	10.9844	11.1048	10.9362	11.156	10.8103	10.985	11.0671	11.151	11.11	11.0046	10.9261	10.8178	11.1477	10.7357	11.035	10.0622	10.8405	10.6024	10.3767	9.95597	10.8513	10.9173	10.5913	10.1135	10.2706	11.002	10.7283	11.0423
568	13	104734657	104736352	1695	9.74687	8.91925	9.64386	8.87648	9.60331	9.64878	8.79903	8.97554	8.91099	9.66988	8.91154	10.402	8.73975	9.67384	9.71972	9.72903	8.81525	9.73734	8.88041	8.87586	8.8285	9.69427	8.8774	8.85473	8.82519	8.88196	8.95767	8.93787	9.71588	8.7519	9.66929	8.88238	8.91919	8.99883	9.03593	9.87803	8.98328	9.01339	8.87344	8.95077	8.93244	9.83164	8.83774	9.02923	8.98898
569	13	109177164	109203852	26688	9.93002	10.2531	9.96127	10.1982	10.5683	10.1658	10.4723	10.2647	10.2285	10.226	10.2471	9.83024	10.1904	9.89419	9.88863	9.92671	9.87936	10.154	10.3068	10.1923	10.2439	10.2709	10.1675	9.93381	10.2726	9.89461	9.93167	10.5075	10.213	10.4923	10.0956	9.8758	10.056	9.77909	10.4322	10.0207	10.1661	10.1523	10.0753	10.0526	9.83672	9.87713	9.84764	9.87767	9.91949
570	13	110143424	110148369	4945	11.3168	11.3032	11.2954	11.4026	11.4285	11.3163	10.7512	11.1913	10.6774	11.301	10.8081	11.2831	11.3753	11.2785	11.2954	11.211	11.2297	11.4161	11.349	11.4439	11.3162	10.7456	11.3719	11.4765	11.3737	11.3445	11.5328	10.6063	11.3872	9.36048	11.4338	11.3557	11.3521	11.2808	11.1218	11.2192	11.2916	11.2253	11.3847	11.3404	11.2794	11.3418	11.2762	11.2566	11.1535
571	13	110285017	110360210	75193	10.6422	10.6452	10.62	10.6652	10.6576	10.6545	10.2564	10.6311	10.2521	10.6764	10.2377	10.6833	10.7112	10.6959	10.6804	10.7012	10.698	10.6856	10.6361	10.6389	10.6545	10.2837	10.6642	10.6624	10.6698	10.6381	10.6435	10.2809	10.6803	10.0174	10.6526	10.6332	10.5513	10.5751	10.5854	10.6055	10.5269	10.5832	10.5946	10.5881	10.5308	10.6238	10.5644	10.5605	10.5513
572	13	110512099	110531531	19432	10.2392	9.71981	10.2526	9.77199	9.73966	10.6258	9.74834	9.87795	9.82047	9.75919	10.2196	9.70946	9.72558	9.73102	10.2241	9.78512	9.79977	9.69213	10.2587	10.2096	10.2823	9.8026	9.76654	9.72997	9.74775	9.79036	10.237	9.80999	9.72935	9.70673	10.2312	9.7352	10.1972	9.77637	10.3007	9.80214	9.70367	9.8276	10.194	10.2612	9.70995	9.81255	9.72408	9.81764	9.93332
573	13	111250585	111303484	52899	10.3111	10.2787	10.3351	10.7915	10.3716	10.2673	9.58184	10.6201	10.3036	10.7544	10.3016	10.791	10.7545	10.3282	10.254	10.7395	10.7088	10.796	10.6911	10.8153	9.55757	10.2662	10.8134	10.8301	10.7974	10.7054	10.2799	10.3666	10.7952	9.45044	10.6917	10.7711	10.627	10.888	10.7327	10.7433	10.6206	10.84	10.8955	10.8059	10.6848	10.7611	10.9937	10.81	10.7255
574	13	112541067	112542692	1625	10.1596	10.2602	10.1569	9.54332	10.2239	10.2122	10.4993	9.68453	10.2027	9.5147	10.222	9.50481	9.4583	10.1889	10.1417	9.55793	9.55173	9.44766	9.53408	9.54469	10.4914	10.1361	9.56048	9.53826	9.5508	9.56316	9.48732	10.1133	9.54018	10.492	9.51135	9.52618	9.51402	9.56005	9.59086	9.45142	9.47351	9.55408	9.51139	9.49645	9.48718	9.54108	9.58048	9.61596	9.60711
575	13	114694855	114724317	29462	9.6229	9.64278	10.1572	10.1485	10.1971	10.143	9.62805	10.0941	10.1583	10.2125	9.6597	10.2288	10.2734	10.1996	10.1897	10.1717	10.2441	10.2316	10.2085	10.1773	10.1349	10.1726	10.1798	10.2102	10.181	10.1553	10.2382	10.1758	10.2275	10.2873	10.1396	10.2016	10.2853	10.2063	10.1968	10.1881	10.4749	10.1744	10.1958	10.2534	10.3885	10.1878	10.1675	10.1569	10.0513
576	13	115684513	115685411	898	10.5538	10.4191	10.6264	8.73316	10.031	9.84962	10.4558	8.84237	9.83065	10.7011	10.5753	9.95621	9.90636	8.49767	10.5307	9.86133	10.5114	10.9271	8.44447	8.27898	10.6175	10.5735	10.5937	8.37773	9.79928	10.4932	10.6846	10.4209	10.5413	10.0611	8.50401	8.46676	10.2122	10.105	8.6627	10.8392	8.45475	9.95949	9.81399	10.1905	9.95406	8.6007	10.7344	10.0126	10.7786
577	13	118198423	118226410	27987	10.0971	9.92623	9.96794	10.1502	10.1646	10.0514	9.92607	9.8971	10.0591	10.0923	10.1701	10.5421	10.0152	10.0882	10.0135	10.0464	10.0239	10.0559	9.97149	10.1217	9.83911	10.2138	10.1341	10.0349	10.1393	10.0996	9.85871	10.1416	10.1306	10.4549	10.0886	10.0743	9.81338	9.93339	10.1684	10.2677	9.81299	9.89255	10.468	9.99313	9.61617	10.0102	10.047	9.96669	10.0327
578	13	118327963	118338845	10882	11.2163	10.6666	9.95088	10.6149	10.5723	10.5157	10.4759	9.83815	11.0844	10.544	11.2528	11.4011	9.79081	10.6807	9.88947	9.9999	9.88206	9.78787	9.86864	10.6	10.632	11.1586	10.6091	9.74451	10.6943	10.6382	10.5326	10.5996	10.5615	11.2258	10.4959	10.5885	11.4192	9.87495	11.3357	11.3714	10.717	9.78658	11.2564	10.7356	9.67062	10.7344	9.85763	10.6077	10.6979
579	14	3200632	7671143	4470511	11.0772	10.9525	10.9568	11.0059	10.9863	10.9712	10.8922	10.9905	10.8502	10.8982	10.9337	10.8403	10.8684	10.8569	10.8799	10.8111	10.8206	10.7545	10.8976	10.9382	10.9359	10.9347	10.8452	10.893	10.9741	11.0839	11.1554	10.8735	10.8825	10.8556	10.8882	10.956	10.8223	10.8171	10.8463	10.8208	10.8047	10.8929	10.9713	10.9375	10.9331	11.0011	10.8779	11.0633	10.9197
580	14	9476924	9491919	14995	10.1378	9.99398	9.97481	10.0402	10.0767	9.06157	9.09123	9.60845	9.94309	9.68934	10.051	9.0363	9.78152	10.0244	9.11593	9.71359	9.13451	10.1416	9.73923	10.0529	9.6392	9.07357	9.05548	10.0692	9.64297	9.70985	10.0862	9.65364	9.74772	10.0179	9.70755	9.68524	10.0387	9.78806	10.0564	9.18142	9.97538	9.96372	9.76347	9.64334	9.98814	9.09169	10.0465	9.71661	9.7662
581	14	11851066	11874015	22949	10.6042	10.6543	10.3762	10.8075	10.364	10.6871	11.0914	11.0347	11.1454	10.631	11.1387	10.8234	10.3027	10.6365	11.0943	11.0802	10.5867	11.1466	10.6858	10.3453	11.1677	10.7403	10.6949	11.1519	11.1626	10.3758	10.6434	11.1313	10.3575	10.3412	10.7217	10.6873	9.91808	10.5565	10.3385	10.4195	10.1848	10.4724	11.1037	10.1257	9.98779	10.5313	10.5865	10.9678	10.5018
582	14	13703652	13703878	226	9.91845	9.98049	10.8295	9.90677	10.7611	9.89234	8.50533	10.0467	8.65865	8.57523	9.85193	9.88237	10.7925	10.194	8.40146	8.42421	10.8212	8.13489	10.1635	10.7588	8.47426	10.0665	10.0614	8.38787	8.41061	10.7827	10.1867	8.6394	10.4161	10.8595	10.1782	10.0475	10.4743	10.0498	9.79631	9.9665	9.38272	9.94798	8.32179	10.6363	9.97915	9.72928	10.2857	9.72419	10.3848
583	14	13832594	13842014	9420	9.85969	9.80231	10.3167	9.908	10.3608	9.87802	9.51366	9.75663	9.43826	9.48124	9.7792	9.97241	10.4164	9.77607	9.57985	9.5662	10.4821	9.51564	9.92714	10.5196	9.56343	9.84739	9.91119	9.41974	9.32415	10.4293	9.86409	9.25109	10.3249	10.4144	9.88587	9.86283	10.5897	9.87444	9.90293	9.995	10.1407	9.87517	9.48115	10.3328	10.714	10.0243	10.4452	9.86834	10.3076
584	14	17144372	17180428	36056	10.1204	10.146	10.0621	10.0987	10.0292	10.1261	10.566	9.96787	10.5079	10.5105	10.1647	10.1761	10.0565	10.0479	10.5738	10.5742	10.0532	10.1835	10.1546	10.1525	10.605	10.2088	10.1758	10.5851	10.5895	10.2752	10.1583	10.1198	10.0324	10.0636	10.1205	10.1167	9.8928	10.1779	10.0101	10.0874	10.0328	10.1433	10.576	9.99431	9.78273	10.1041	10.0398	10.121	9.95307
585	14	31420361	31420623	262	10.4211	10.4237	9.74167	10.7489	10.3339	10.4823	9.71671	10.777	10.4012	10.3399	10.7688	10.3687	10.3911	9.63038	10.7758	10.395	10.3992	10.2178	10.6335	10.8737	10.3955	10.325	9.59462	10.8007	9.67182	10.7057	9.58452	10.4404	10.3379	10.2866	10.3118	10.2451	10.8254	10.689	10.3124	10.2653	10.2133	10.6638	9.68487	10.6931	10.6565	10.3186	9.63453	9.68625	10.7158
586	14	34491963	34505348	13385	10.1419	9.75314	10.1555	9.72334	9.71496	10.2417	10.1766	9.83327	10.253	9.7633	9.74655	10.1942	10.2208	9.69161	9.0136	9.70264	9.6951	9.67977	10.2228	10.1583	9.77283	9.75626	9.74022	9.00987	9.77689	9.6582	10.253	10.1609	9.62442	9.6797	10.1428	9.74827	9.55759	10.1677	9.05646	10.0592	9.53042	9.20025	9.67988	9.09674	9.50953	9.95611	10.2401	9.61551	10.2308
587	14	34935044	34947005	11961	8.98708	8.87182	9.53944	9.67978	8.81309	10.1906	10.2236	9.6116	10.1874	9.5297	9.75327	10.2451	10.2635	9.71877	8.84717	9.55729	9.51772	9.55688	10.1337	10.2298	8.92543	9.58816	9.67495	8.90113	9.70842	8.85458	9.71131	10.2149	8.88673	9.53769	9.59749	9.69115	9.77527	9.60868	8.78691	10.2222	9.67416	8.91924	9.57995	8.88378	9.58526	10.2497	10.2838	9.5778	10.1268
588	14	35539377	35543834	4457	10.6342	10.6553	10.6159	9.77796	10.6968	9.6965	9.5225	9.62619	9.46835	10.3626	10.3338	9.43993	9.73232	10.3667	10.5766	10.2855	10.2652	10.2918	9.70042	9.69288	10.3305	10.3424	10.2482	10.6051	10.274	10.6404	10.3195	9.7517	10.7851	10.4479	10.384	10.3026	9.86523	10.2639	10.6272	9.76054	10.5131	10.739	10.4442	10.4453	9.62312	9.54646	9.80325	10.3138	9.59882
589	14	36416179	36417134	955	10.7889	10.8521	10.8147	10.2346	10.8645	10.1569	9.3724	10.0971	9.36521	10.5298	10.1835	9.29224	10.1939	10.5208	10.8684	10.1809	10.4938	10.2884	10.2493	10.1266	10.1446	10.1493	10.1636	10.8621	10.1774	10.7502	10.5856	10.5561	10.8076	10.458	10.2051	10.2218	10.2431	10.5914	10.827	10.0764	10.5164	10.8429	10.1873	10.1256	9.48442	9.2703	10.8083	10.132	9.30487
590	14	36600804	36600995	191	8.34135	8.26491	8.35344	9.16955	8.24358	9.81039	9.71369	9.73717	9.58251	9.25196	9.18861	9.81127	9.82351	9.26314	8.25564	9.17587	9.32565	9.11419	9.80604	9.93419	9.07276	9.10809	9.2658	8.21657	9.16343	8.32868	9.34028	9.83301	8.22803	9.26437	9.18916	9.15752	9.90799	9.41384	8.2443	9.93886	9.29985	8.18865	9.06028	9.00267	9.75967	9.76789	9.93437	9.18623	9.80106
591	14	37935152	37946976	11824	11.1239	10.6962	10.6296	10.6659	10.6733	11.0347	11.3544	10.5617	10.6738	11.1485	10.7064	10.7068	10.7482	10.7055	10.7058	10.6854	11.1077	10.7588	10.6417	10.6947	11.1236	10.674	10.7237	10.7263	11.182	10.6575	10.6813	10.6915	10.7206	10.7143	10.688	10.6718	10.6774	10.6546	10.6527	11.0825	10.7648	10.6437	10.7347	10.6829	11.2008	10.729	10.669	10.663	10.5729
592	14	40544167	40564409	20242	11.0782	11.1356	10.4398	11.149	11.1636	11.1857	10.9696	11.1423	10.9998	10.4678	8.76844	11.117	10.4591	10.4331	10.8941	11.074	10.8832	11.0363	11.0529	11.082	11.1263	11.1523	10.4433	10.9078	11.1352	11.0233	11.0687	10.9774	11.1366	10.4377	11.1793	11.0652	11.0032	10.9099	10.3169	10.9774	10.8517	11.0995	10.4485	10.9834	10.9683	11.089	11.0882	10.2596	10.9535
593	14	40716609	40737506	20897	9.82776	9.77602	9.86492	9.76316	9.68858	9.73532	10.2238	11.0127	10.5222	9.72109	9.63607	9.62445	9.7231	10.1737	10.2124	9.73488	10.1957	9.54697	9.69931	9.70976	9.74554	9.80474	9.67063	10.3721	9.64092	9.71484	9.73865	10.6003	9.79715	9.54524	9.68472	9.70935	9.56564	10.5453	10.2238	9.8315	10.0184	9.90658	9.70066	10.5715	9.83209	9.77751	9.75126	9.7881	10.4025
594	14	40897017	40992496	95479	10.5714	10.6229	10.5753	10.6355	10.6427	10.5185	10.5656	9.8523	10.1051	10.5869	10.6343	10.6144	10.662	10.5725	10.5536	10.5941	10.5909	10.6483	10.5772	10.6392	10.6355	10.5933	10.6377	10.5689	10.5522	10.5874	10.5824	10.1427	10.615	10.6644	10.6191	10.586	10.469	10.0674	10.5472	10.5854	10.6677	10.4775	10.6234	10.2098	10.798	10.7478	10.5426	10.5369	10.3653
595	14	41640656	41648076	7420	10.799	11.0063	10.6845	10.8961	10.9394	10.7537	10.7571	9.61542	10.2881	10.9836	10.4217	10.9721	10.9911	10.7936	10.7574	10.8621	10.6746	11.0346	10.7964	10.8563	10.8147	10.7463	10.9331	10.8043	10.874	10.714	10.9637	10.3807	10.7286	10.781	10.7876	10.8475	11.0744	10.2968	10.8037	10.9035	11.0483	10.876	10.51	10.428	11.1299	11.0559	11.0281	10.4371	10.7198
596	14	42076755	42953331	876576	10.9935	11.0375	11.0197	11.0546	11.1347	10.7281	10.9737	10.5978	10.6429	10.9576	10.6181	11.0013	10.9711	10.8738	10.9498	10.9442	10.4943	11.0334	10.6604	11.112	11.0684	11.0773	10.954	10.9934	11.0956	11.0401	11.1508	10.6456	10.9062	10.8826	10.9649	11.0529	10.6362	10.6402	10.8631	10.5993	11.0119	10.9521	10.7946	10.788	11.1119	11.1692	11.0425	10.7509	10.9768
597	14	44396801	45349904	953103	10.3551	10.397	10.3258	10.3879	9.91908	10.1062	10.2817	9.89622	9.8548	10.2953	10.3631	9.83349	10.3026	10.5769	10.3188	9.8949	10.4073	9.83657	10.0774	9.89349	9.93261	9.91696	10.2903	10.3102	9.90158	10.3206	9.93543	10.0837	10.2947	10.5644	9.83904	9.89368	10.0508	9.836	10.6084	10.0233	9.83742	10.2782	9.94236	9.95091	9.9863	10.0125	9.85926	9.92463	9.94339
598	14	52484180	52492450	8270	10.0629	9.5572	9.74991	9.61597	9.86928	9.69825	10.0648	9.74873	10.1129	9.62199	9.95899	9.49619	9.54739	9.6207	10.0005	9.71036	9.65772	9.89471	9.56298	9.84874	10.0293	9.63591	9.61914	9.92482	9.58884	9.63131	9.56329	9.69159	9.65935	9.647	9.69433	10.029	10.09	9.43097	9.53077	9.61707	9.60886	9.51817	9.89619	9.64314	9.57948	9.60784	9.76314	9.46215	9.63981
599	14	63523410	63543436	20026	10.1768	10.7308	10.1404	10.0775	10.6544	9.73038	10.5773	10.1446	10.4392	9.72689	10.6697	10.6258	10.1009	10.1385	10.6313	10.5582	10.4091	10.6202	10.6822	10.173	10.5155	10.1878	10.1462	10.2594	10.2337	10.515	9.67291	10.5566	10.2414	10.4704	10.1448	10.569	10.0419	10.6155	10.088	9.82044	9.99581	9.79088	10.7394	10.1591	9.87659	10.3357	9.78677	10.2642	10.4714
600	14	63715836	63731412	15576	9.85198	10.3589	9.87085	10.3852	10.3902	9.34346	10.2949	9.83765	10.2427	9.23517	10.3555	10.3634	9.86432	9.87174	10.3152	10.242	10.2855	10.4014	10.4169	9.91405	10.2955	9.85806	9.84048	9.94157	9.90708	10.3312	9.27374	10.2136	9.76686	10.2912	9.75607	10.311	10.468	10.3443	10.3363	9.25319	10.3016	9.25487	10.3554	10.3699	10.333	10.3709	9.23091	10.4188	10.2405
601	14	68685551	68694460	8909	9.99164	10.6923	10.0759	10.0294	9.9079	10.7033	10.6612	10.1525	10.1695	10.072	10.0197	9.89295	10.0358	10.7714	10.6238	10.6158	10.0399	9.87376	10.015	9.92681	10.697	8.73034	10.0081	10.6478	9.99691	10.5723	8.77855	10.7982	10.0755	10.6129	8.72596	10.697	10.0486	8.7971	10.6766	10.6328	10.0728	10.8813	9.969	10.6243	10.5857	10.0054	10.6747	10.6924	10.6887
602	14	72880516	72895559	15043	10.6227	9.81218	10.578	10.9798	10.9878	10.7278	10.5656	9.97462	10.686	9.81897	10.5719	10.5898	10.5682	10.9642	10.5815	10.5919	10.989	10.9165	11.0132	10.7291	10.6282	9.95326	10.9625	11.0468	10.6073	10.6026	9.76778	10.9334	10.5214	9.78457	9.87118	10.9582	10.603	9.84904	10.5854	10.499	9.81874	10.5227	10.6041	10.4269	10.5355	10.4779	11.0003	11.0678	10.5743
603	14	72957542	72959141	1599	10.7147	11.0469	10.6231	10.1728	10.1487	10.5806	10.6456	10.7021	10.5794	10.9939	10.8051	10.8503	10.8635	10.2499	10.7212	10.6918	10.3889	10.2843	10.2678	10.7705	10.6754	10.9554	10.2116	10.2614	10.7549	10.6269	11.1078	10.2595	10.7497	11.0612	10.9341	10.272	10.8651	10.9526	10.6644	10.7066	11.3378	10.6893	10.8522	10.8071	10.9619	10.7367	10.2852	10.1612	10.3597
604	14	73243966	73249111	5145	10.2841	10.6991	10.3957	9.69171	9.65564	10.4186	10.4229	10.8343	10.3689	10.7444	10.2921	10.139	10.2304	9.60238	10.2487	10.2807	9.50585	9.36374	9.5141	10.2194	10.3896	10.6731	9.51497	9.56548	10.289	10.3227	10.679	9.75955	10.3486	10.6231	10.7134	9.55817	10.4555	10.606	10.3626	10.2495	10.7441	10.258	10.2004	10.2293	10.3427	10.2225	9.55684	9.62141	10.349
605	14	74318558	74331581	13023	10.7397	9.18284	10.1305	9.18995	10.2156	9.17259	9.18412	10.0594	9.15793	10.1341	9.0608	9.03603	9.06247	9.10456	9.15686	9.16574	10.1107	9.11909	9.1412	9.12898	10.6757	10.1509	10.7963	10.1352	10.1315	9.24944	10.7358	9.27153	10.1786	9.00783	10.0758	10.1718	9.00623	9.05972	9.09055	10.1031	10.0218	10.1339	9.17237	9.14794	9.14422	9.18117	10.1891	10.1311	10.107
606	14	75621182	75623938	2756	10.2684	9.54567	10.1269	9.53369	10.0791	9.51363	9.493	10.1927	9.49274	10.0532	9.44565	10.0127	9.48793	9.48953	9.5527	9.54847	10.0865	9.50406	9.46826	9.51417	10.2979	10.0527	10.3454	10.091	10.0852	9.53314	10.049	9.53383	9.4884	9.4293	9.49432	10.0044	9.14219	9.38311	9.81995	10.2169	9.64833	9.96842	9.43716	9.74608	9.03262	9.85305	10.0233	9.89514	9.82306
607	14	78207014	78207745	731	10.8471	10.9694	10.3552	10.2345	10.2786	10.8164	10.3621	10.2966	10.53	10.9856	10.2984	10.4083	10.9582	10.9142	10.4173	11.0298	11.0088	10.283	10.3844	10.3479	10.891	10.9197	10.896	10.317	10.3352	10.8396	10.876	10.9747	10.9517	10.9019	10.9905	10.3161	10.2615	10.75	10.5872	10.9669	10.8672	9.11296	10.0729	10.3201	10.8019	10.1944	10.8173	10.1594	10.2079
608	14	79921672	79935942	14270	10.6325	10.7102	9.93961	10.6421	11.1097	11.094	10.6107	11.045	10.7172	11.1328	11.1435	10.7069	11.1436	10.77	9.81974	10.7425	11.1775	11.0576	9.9766	10.6612	10.726	10.7498	11.1151	11.2217	9.95676	11.0925	10.6907	11.1143	10.6871	11.0899	10.7203	10.6025	10.4113	11.099	10.9208	10.9937	10.8168	10.9783	10.6433	10.967	10.8185	10.427	11.1602	10.4636	10.5648
609	14	81762359	82272046	509687	10.2819	10.6699	10.3039	10.9789	11.0038	10.945	10.6591	11.0514	10.6765	10.7691	11.0172	10.7701	10.3381	10.3635	10.3569	10.3058	10.6665	10.7563	10.3609	10.7559	10.3688	10.4137	10.9936	10.6466	10.7137	10.7337	10.959	10.6926	10.7559	10.7329	10.2896	10.7546	10.3322	10.4058	11.02	11.0116	10.4025	11.177	10.3164	10.7348	10.4003	10.8312	10.9929	10.6577	10.6513
610	14	83692252	83699784	7532	10.1621	10.1262	10.086	10.0398	10.0295	10.7083	10.0862	10.7883	10.082	10.0744	10.8455	10.891	10.1971	9.47848	9.41241	10.2075	10.2242	10.0927	9.64535	10.7858	9.41332	10.8308	10.8952	10.1115	10.7644	10.0409	9.98166	10.8669	10.9074	10.8778	10.1396	10.8684	9.24176	10.8927	10.6257	10.8014	9.69547	10.8013	10.0882	9.84254	9.59971	10.6925	10.8986	9.91783	10.6036
611	14	84107263	84127489	20226	9.91323	9.86856	9.85019	9.88961	10.2816	9.76904	9.73744	9.83749	9.8272	9.79369	9.8496	9.8721	9.8154	9.8054	9.75844	10.1698	9.90357	10.3177	10.3014	9.85105	10.2424	9.88049	9.90718	9.78653	10.1742	10.2552	9.88197	9.73552	9.84587	9.70947	9.72853	9.86048	9.35472	9.78285	9.6823	10.1216	9.62588	9.81556	9.91246	9.86178	10.2336	9.79132	9.7581	10.2101	9.78454
612	14	84464875	84610363	145488	10.6043	10.6016	10.5696	10.6451	10.251	10.516	10.5617	10.4145	10.4915	10.542	10.5875	10.6488	10.6169	10.558	10.5498	10.1749	10.5796	10.1708	10.1454	10.5844	10.1838	10.5768	10.5921	10.5561	10.1477	10.1674	10.5789	10.4918	10.5535	10.5547	10.5102	10.57	10.4088	10.5614	10.5921	10.1346	10.7134	10.6132	10.6616	10.738	10.3047	10.7122	10.5458	10.1241	10.4209
613	14	85098924	85109651	10727	9.30638	9.31084	9.44352	10.4574	10.5293	10.6209	10.4014	9.709	10.5214	9.2793	9.21128	10.3939	9.11924	10.4458	9.30857	10.6083	9.20904	10.4344	11.0587	10.451	10.5598	9.34566	9.13742	10.57	11.1217	10.5803	10.4554	9.40201	10.478	9.11951	9.37032	10.5214	9.27977	9.25701	9.45669	10.5601	9.13942	9.46141	9.26501	10.515	10.6759	10.565	9.24492	11.1951	9.71827
614	14	90380187	90380247	60	9.84956	9.64183	10.0336	9.79987	10.6132	8.575	10.7117	10.7204	10.1067	9.92548	10.8133	8.48468	8.38715	8.46713	8.5645	9.8184	9.97337	8.2479	8.4244	8.42553	10.7375	10.0926	10.6396	9.75244	8.52813	10.6682	8.49589	10.6116	10.7807	9.83093	8.39545	8.55201	8.7685	8.686	10.7449	8.71091	8.57667	8.52733	8.46543	10.1778	10.1442	8.50638	9.65746	9.83266	9.88252
615	14	91461859	91492733	30874	10.2458	9.11716	10.2657	10.1657	9.07585	10.1745	8.97047	9.14158	10.006	10.262	8.92694	10.4265	10.3784	10.4253	10.5352	10.1691	10.3056	10.0731	10.5286	10.5376	9.09501	10.1297	10.25	10.1778	10.5652	9.14304	10.5581	9.11961	9.06508	10.0505	10.5237	10.588	10.2963	10.3847	9.17207	9.94992	10.4904	10.7067	10.5161	10.317	10.2101	10.442	9.16607	10.134	9.26408
616	14	95445940	95528057	82117	10.2541	10.2042	10.2934	10.2067	10.2649	10.2207	10.2684	10.1774	10.2615	10.2924	10.36	10.2121	10.275	10.1786	10.2602	10.0475	10.2916	10.1825	10.187	10.2385	10.3088	10.324	10.2287	10.147	10.2327	10.2472	10.3318	10.3142	10.2181	10.262	10.1977	10.3166	9.81669	10.1661	10.2071	10.1988	10.0802	10.2298	10.2564	10.2371	10.0696	10.1605	10.3232	10.1705	10.1468
617	14	97780779	97832155	51376	10.0753	10.0503	10.0488	9.99509	10.0679	9.81757	9.88425	10.0526	9.97302	10.0238	9.82652	10.1673	10.6232	10.1414	10.0797	10.0363	10.5346	9.97207	9.99151	10.1797	10.0101	10.1413	10.0524	10.1537	10.2212	10.056	10.1403	9.87068	9.8338	10.0778	10.5102	10.1166	10.0723	10.615	9.89895	10.116	10.2343	9.97105	10.73	10.2597	10.6142	10.2826	10.1177	9.91459	9.90104
618	14	99527482	99532575	5093	9.38741	9.46207	9.39812	10.0277	10.106	9.33531	9.35172	9.90815	9.91789	9.30822	9.39326	10.5833	10.6963	10.556	10.0356	9.41169	10.55	10.1043	9.99579	10.6069	9.97858	9.9655	10.1037	9.98354	9.40935	9.32578	10.0512	9.35266	9.29873	9.39637	10.0127	9.98742	9.83404	9.98639	9.43816	9.4181	9.85883	9.88273	10.1416	10.0449	9.89564	10.0606	9.50049	9.47735	9.40455
619	14	108869805	109052336	182531	10.4511	10.4571	10.3711	9.89733	9.93293	10.3421	10.4401	9.9266	10.4332	9.9377	9.95013	10.557	10.009	9.90405	9.92674	10.4434	10.4673	10.5174	10.535	10.5266	9.96002	10.4676	10.4814	10.4552	10.4716	10.472	10.4846	9.91481	10.5034	9.9223	9.92332	10.5011	10.3751	9.92711	10.4716	10.5325	10.5821	10.4646	10.5339	10.5751	10.58	10.5762	9.91452	9.87764	10.4034
620	14	110067383	110117892	50509	10.4066	10.4895	10.3771	9.94593	9.896	10.3799	10.4199	9.88534	10.3937	9.87447	9.9175	10.5229	9.97823	9.91884	9.92578	10.4762	10.4516	10.4751	10.4513	10.4266	9.94147	10.4383	10.4626	10.3869	10.4766	10.433	10.3959	9.95788	10.499	9.93481	9.97102	10.3917	10.3007	9.8575	10.4285	10.4303	10.5871	10.4398	10.4366	10.5399	10.5476	10.5334	9.88791	9.83426	10.3744
621	14	110191067	110226475	35408	10.4283	10.4716	10.2836	9.96674	10.0167	10.3279	10.3409	9.79126	10.3673	9.8876	9.93253	10.5439	9.96114	9.87143	9.91262	10.422	10.4071	10.5217	10.3823	10.5149	9.87975	10.3745	10.4413	10.4103	10.4235	10.4466	10.4616	9.80739	10.4015	9.99643	9.90037	10.4533	10.4909	9.84689	10.4283	10.4625	10.6719	10.3638	10.4897	10.5815	10.7017	10.5688	9.89328	9.89135	10.2996
622	14	111421090	111489633	68543	10.4518	10.741	10.3868	10.4522	10.278	10.3615	10.6794	10.4203	10.5946	10.2822	10.3793	10.3666	10.2876	10.2966	10.3169	10.51	10.7081	10.438	10.3116	10.4809	10.3157	10.5012	10.4526	10.3495	10.5299	10.6075	10.3191	9.68888	10.4316	10.0814	10.0707	10.3341	10.1633	10.2072	10.2409	10.3029	10.7198	10.3951	10.4445	10.4855	10.5219	10.3983	10.2002	10.6198	10.5174
623	14	112786859	112786924	65	8.70135	8.73732	8.87935	10.3542	10.3653	8.83022	10.459	10.3692	8.77069	10.4513	10.4511	10.2615	10.4768	10.2213	10.4114	11.0052	8.50305	10.3071	10.2583	11.3163	8.67927	10.3451	8.6906	10.3407	10.2082	8.72627	10.1537	10.3008	10.5315	11.2182	11.0997	10.3955	10.7146	10.1163	10.3938	10.3982	8.73433	10.4678	10.4257	11.3517	10.6965	10.3465	10.2732	8.6974	9.15627
624	14	116640642	116643475	2833	10.6683	10.5941	10.6374	10.5147	10.5201	10.6642	10.5964	10.4029	10.6954	10.6045	10.6321	10.6061	10.6088	10.1717	10.5709	10.6877	10.677	10.0615	10.5719	10.6049	10.2813	10.6141	10.6383	10.6156	10.6595	10.5331	10.5534	10.3556	10.6042	10.6087	10.5901	10.6182	10.3642	10.6716	10.6324	10.678	10.444	10.5651	10.6051	10.5941	10.4824	10.5559	10.6637	9.4327	10.7688
625	14	122006064	122006350	286	10.7015	10.6487	10.2175	10.2722	10.2863	10.6325	10.3068	10.7028	10.3596	10.6819	10.1894	10.7938	10.7747	10.8023	10.2153	10.8345	10.3524	10.646	10.2853	10.6602	10.6467	10.6651	10.6728	9.44134	10.6959	10.631	10.2471	10.6922	10.3562	10.2308	10.7091	10.6764	10.8142	10.7371	10.3788	10.788	10.7354	10.8086	10.2533	10.7592	10.7172	10.7668	10.738	10.757	10.6911
626	15	18654064	18701020	46956	9.96999	10.6575	10.4066	10.0019	10.0395	9.9358	10.0119	9.99529	10.44	10.1493	10.0467	10.7086	10.1075	10.5471	10.0525	9.98963	10.5264	10.2216	10.5336	10.0444	10.0312	10.5034	10.036	10.0263	10.5573	10.5705	10.0473	9.96088	10.6178	10.0816	10.5235	10.0274	10.5497	10.0651	10.6094	10.0198	10.1674	10.0827	10.1185	10.6996	10.1732	10.8063	10.6046	10.6387	10.478
627	15	18713339	18756200	42861	10.3131	9.72676	10.4461	10.3426	10.279	10.3234	10.3488	10.436	10.1946	10.448	10.312	10.1452	10.172	10.2032	10.3966	10.0887	10.4569	10.5026	9.77365	10.0715	10.1264	10.1629	10.146	10.1113	10.3499	10.4001	10.2528	10.1497	9.81009	10.1144	10.2068	10.1013	10.3851	10.4665	9.72931	10.3987	10.2552	10.5855	10.1023	10.2761	10.3671	10.1721	10.0899	9.69163	9.78199
628	15	19835128	19869085	33957	9.89737	10.5682	10.0309	9.83176	9.83221	9.76889	9.9867	9.91792	9.98261	9.99783	9.79846	10.025	10.0398	9.88357	9.75116	10.458	10.0544	9.71974	10.009	9.2429	10.027	10.0796	10.0842	9.2898	10.0247	10.0043	9.86035	9.99047	10.374	10.3595	10.0254	9.23048	9.35091	9.70052	9.82902	9.29547	9.29874	9.5085	9.95962	9.35356	9.19101	9.50604	10.3072	9.92869	10.1105
629	15	20002200	20069823	67623	10.067	10.3886	10.0939	10.4822	10.4958	10.4099	10.1277	10.0599	10.0439	10.0583	10.4722	10.0838	10.0793	10.1229	10.4543	10.3923	10.0971	10.5179	10.2858	10.062	10.3381	10.1149	10.0915	10.0908	10.061	10.0456	10.4183	10.1158	10.4139	10.3435	10.0937	10.0463	10.0066	10.3928	10.3137	10.4787	10.3114	10.4872	10.0966	10.1641	10.7017	10.1294	10.3039	10.2086	10.1095
630	15	21134231	21172655	38424	9.4465	10.2998	9.51728	9.98837	9.91623	9.41428	9.44551	9.44338	9.99047	9.92058	10.0153	9.98104	10.2413	9.79354	9.41963	10.0444	9.42522	9.41413	10.1096	10.0388	9.44084	10.05	9.4334	9.97672	9.84266	10.0526	9.97585	10.0044	10.0167	9.79097	9.89207	9.99432	9.36705	9.46458	10.2006	9.38954	9.67087	9.46434	9.91088	9.87316	9.399	9.99879	9.88744	9.85514	10.1903
631	15	21563129	21834835	271706	10.0919	10.554	10.0805	10.1239	10.1096	10.1284	10.0784	10.1269	10.0421	10.1243	10.1815	10.4306	10.3019	10.1389	10.1476	10.1467	10.0846	10.1815	10.3698	10.1832	10.1851	10.2046	10.1903	10.0841	10.1601	10.1623	10.0649	10.0985	10.2309	10.1465	10.1462	10.1094	9.8497	10.0332	10.4211	10.1479	10.1075	10.1894	10.5744	10.0978	10.1872	10.1635	10.514	9.9982	10.3488
632	15	22146459	22192021	45562	9.61087	10.2523	9.65492	9.62749	9.60624	9.23518	9.66601	9.11969	9.58704	9.69885	10.0015	10.0598	10.1048	9.77872	9.25327	9.73903	9.68236	9.12082	10.0625	10.0937	9.30279	9.96561	9.21179	9.54881	9.9845	10.0252	9.56186	9.69757	10.1013	9.83905	9.84024	9.64974	9.3902	9.54945	10.1749	9.03968	9.78347	8.99131	10.2261	9.7437	8.93987	10.1169	10.0947	9.45694	10.0029
633	15	22457663	22478262	20599	10.3278	10.5904	10.3893	10.3458	10.2999	10.1258	10.32	10.2089	10.3786	10.3656	10.6411	10.3289	10.3302	10.4333	10.0395	10.4081	10.4025	10.0153	10.5024	10.6652	10.1546	10.6635	10.106	10.3598	10.6841	10.6911	10.2986	10.3663	10.4527	10.3285	10.2974	10.3319	9.72109	10.2851	10.2673	9.77496	10.0171	9.961	10.602	10.1215	9.57635	10.4102	10.6525	10.0996	10.5712
634	15	25938508	25938536	28	10.4637	9.74848	9.82008	9.60006	9.6815	9.80191	9.73043	9.94316	10.4108	10.4164	9.7335	9.698	10.5329	10.5165	9.71666	9.82605	10.4791	9.75477	10.4538	9.72698	8.06051	9.71198	10.4938	9.82425	7.92975	9.70324	10.3278	9.8158	10.3308	10.4703	10.4496	9.68423	10.0531	9.78235	10.3605	10.4652	9.98741	8.055	10.3415	9.58815	9.82423	9.58586	10.4365	9.67182	9.67846
635	15	26971755	26975305	3550	10.5077	10.527	10.5497	10.4863	10.5508	10.5612	9.15349	10.5433	9.22736	10.5798	10.5167	9.0706	9.01161	9.21139	9.12827	9.17752	9.16287	10.4894	10.3557	10.4273	11.211	9.20957	11.2567	9.05219	10.5192	9.23043	8.99003	9.33989	9.08619	9.17604	9.17419	9.14396	10.3665	10.4613	9.11967	10.3962	10.5416	10.5936	8.97335	10.5301	9.15784	9.06399	9.0898	10.4187	10.2739
636	15	29502036	29545764	43728	10.5759	10.6053	10.4876	10.621	10.6226	10.1625	10.5582	10.4443	10.1862	10.5295	10.6141	10.609	10.635	10.5712	10.1662	10.6023	10.1418	10.6213	10.1702	10.6085	10.551	10.1923	10.186	10.567	10.5814	10.1487	10.5577	10.5594	10.6135	10.607	10.5559	10.5492	10.7709	10.5276	10.3525	10.2335	10.8136	10.5259	10.1297	10.6429	10.3739	10.692	10.1501	10.5719	10.4329
637	15	33880442	33900991	20549	10.995	10.468	10.9366	9.42757	10.3994	10.95	10.3297	10.8427	10.3865	10.9392	10.3665	11.006	10.4213	10.9453	10.9559	10.7364	11.0092	11.0095	10.4907	10.3881	10.4372	10.4253	10.402	10.4456	9.42252	10.5188	11.0048	10.6812	10.9767	10.9071	10.8901	10.4472	10.281	10.404	10.901	10.9475	10.9798	10.9247	10.9115	10.9506	10.8296	10.9415	10.9488	10.977	10.4432
638	15	42106513	42112059	5546	9.06013	10.369	10.069	11.0009	10.3672	10.7701	10.8398	10.7745	10.6816	10.3832	10.9207	8.94191	10.3157	10.3907	10.8748	10.7848	10.2553	11.0572	8.89424	10.3497	10.7819	10.2697	10.3166	10.909	10.8736	10.2519	10.9885	9.13348	10.3515	10.2441	10.8829	10.9263	10.3054	10.2779	8.88976	10.9073	11.1891	10.3594	10.5549	10.957	11.2521	8.87565	10.8924	10.2569	10.5872
639	15	46239982	46247063	7081	10.29	10.2415	10.193	9.82753	9.83528	10.155	10.1536	10.1511	10.1773	9.77899	10.1524	10.235	10.3038	9.78641	9.74745	9.85933	10.2317	9.76352	10.176	10.1789	9.83464	9.87974	10.2384	10.2554	10.2508	9.84729	9.73196	10.248	9.81837	9.73631	10.1655	10.2075	9.6763	10.1605	10.2857	9.90009	9.98072	9.85607	9.68718	10.2769	10.4998	10.2803	10.1355	9.79123	9.96418
640	15	47636509	47639595	3086	10.3565	10.9888	10.7763	10.427	11.0096	10.8398	10.2829	10.2475	10.843	10.8431	9.54355	10.4151	10.3874	10.4119	10.3751	10.9105	10.9037	9.646	10.8441	10.9305	10.3476	10.3184	10.4104	10.9249	11.0233	10.3205	10.9914	10.3059	10.4119	10.9434	10.9089	10.3793	11.141	11.0076	11.0912	10.3302	11.4667	9.64855	11.1053	9.93371	10.8454	10.482	11.0778	10.9875	9.68984
641	15	47861366	47886626	25260	10.1924	10.3895	10.1142	10.2411	10.1828	10.0708	9.67118	9.98128	10.0262	10.0988	10.2287	9.83725	10.2858	9.7185	9.72818	10.2025	10.1353	9.75797	9.98677	10.2477	10.1344	10.042	10.1803	10.1704	10.314	10.1964	10.2617	9.92764	9.76506	10.2402	10.0735	9.62656	10.0469	10.1748	10.1354	9.6672	10.2813	9.04856	10.3338	10.3046	9.76594	9.87014	10.207	10.1252	10.0316
642	15	47894162	47942137	47975	10.2106	10.5629	10.502	10.2032	10.5536	10.5488	10.5447	10.2707	10.5458	10.6167	9.7702	10.672	10.2065	10.6114	10.6026	10.6174	10.5752	10.1329	10.5741	10.5674	10.158	10.1426	10.186	10.5884	10.5577	10.1768	10.5721	10.2207	10.6635	10.6072	10.6104	10.5833	10.4724	10.6293	10.6443	10.6757	10.6489	10.6199	10.6504	9.80294	10.583	10.5689	10.6497	10.5629	9.94661
643	15	48458300	48477647	19347	9.80139	10.505	10.4009	10.0623	10.4543	10.5013	9.93144	9.96315	9.04985	9.85242	10.4633	9.7405	10.1221	9.92102	8.9321	9.93736	10.0712	9.91648	10.5708	9.76253	10.0771	9.98427	10.0636	10.452	10.0338	9.92128	9.87309	10.1177	9.82611	9.78589	10.532	9.82114	8.90251	9.78722	8.85088	8.89406	10.5476	9.09055	10.3967	10.5567	9.92648	9.94114	8.85281	9.93931	10.1996
644	15	54022603	54023121	518	9.80336	10.142	10.2342	10.2283	10.1843	9.95081	10.1827	9.82684	8.71629	9.69219	9.26911	10.2288	9.61843	10.232	8.45538	9.79329	10.2648	9.65758	10.1599	9.78916	9.64517	10.2505	9.32132	9.52401	9.65523	9.78727	10.1415	9.34788	10.2641	10.1336	10.1794	10.1342	10.2901	9.86935	10.3122	9.48169	10.0423	10.317	10.1428	9.76212	10.4217	10.2283	10.2706	9.89605	9.84869
645	15	55025921	55026265	344	9.8066	9.92429	10.362	9.68327	8.77441	9.78775	10.3478	9.73015	8.90555	9.70514	8.74525	10.6625	9.9544	10.5343	8.74013	9.79756	10.3888	9.91319	10.5051	9.89491	9.7461	10.3575	8.70425	9.92874	8.83186	9.87962	10.5749	8.93904	9.84796	9.85119	10.3887	10.4153	10.4786	9.91008	10.4333	8.70017	9.7348	10.379	9.82613	9.77813	10.407	10.5488	10.5528	8.73557	9.82928
646	15	56628058	56711813	83755	10.2055	10.1568	10.1597	10.1378	10.5949	10.1199	10.1152	10.0131	10.0495	10.1205	10.123	10.1728	10.2005	10.2018	10.1387	10.1637	10.5196	10.093	10.5419	10.6141	10.1508	10.5373	10.1055	10.1363	10.074	10.1815	10.0387	10.1966	10.1802	10.1252	10.0809	10.5887	10.4424	10.1535	10.5517	9.92293	10.0827	10.1813	10.2612	9.97315	10.6163	10.1167	10.2197	10.0035	9.97097
647	15	57135310	57181123	45813	10.2034	10.1541	10.1129	10.2413	10.9043	10.1131	10.2084	10.1938	10.2109	10.2362	10.1932	10.2178	10.2806	10.184	10.2241	10.2256	10.7957	10.2594	10.8189	10.8713	10.2058	10.7698	10.1439	10.1796	10.0633	10.2275	10.0998	10.1382	10.2474	10.2059	10.1828	10.8458	10.9851	10.1076	10.863	10.226	10.3595	10.1295	10.2944	10.2925	11.0554	10.2839	10.1166	10.123	9.99564
648	15	57340168	57347478	7310	10.2588	10.2507	10.5853	10.5768	10.6175	10.19	10.2957	9.90028	9.84731	10.211	9.74166	10.1704	10.2442	9.80765	9.84029	10.2347	10.2174	10.2249	10.6909	10.1956	10.1795	10.2094	9.82415	10.1896	9.84548	10.1908	9.87173	10.2261	10.2084	9.8102	10.1922	10.61	10.6858	10.2683	10.6685	9.82171	10.2645	10.2527	10.2159	9.85847	10.6655	10.1995	10.2513	9.80554	10.2111
649	15	57941561	57943509	1948	10.083	9.962	10.1692	10.0633	10.2943	9.95376	10.0322	9.69561	9.84244	10.0481	9.82261	10.3694	10.1647	9.73525	9.94799	10.0654	10.0613	10.1183	10.2168	10.0385	10.0402	10.0383	9.71324	10.0334	9.72345	10.0621	9.81064	9.87588	10.0291	9.87755	10.0457	10.3062	10.7347	10.1318	10.4816	9.95798	10.5474	10.3934	10.1269	10.0069	10.7338	10.489	10.1084	9.89532	9.73667
650	15	59688211	59688516	305	10.4337	11.1184	10.1151	10.3017	10.3805	10.9519	10.2587	10.8542	9.14028	10.4187	9.2017	11.0318	11.1199	10.6589	10.8919	10.1958	10.2704	10.4955	10.9173	10.5346	10.9269	10.4547	9.40072	10.409	10.263	10.2602	10.5768	9.97128	9.26775	11.1207	9.7975	10.3683	11.2925	10.1052	10.9985	10.277	10.7943	10.3353	9.95599	9.20249	11.2741	11.0393	10.3418	9.85007	9.66986
651	15	59826344	59837575	11231	10.6233	10.5663	10.0262	10.168	10.1572	10.4865	10.1081	10.3055	9.45341	10.1574	9.59262	10.6771	10.667	10.5933	10.6277	10.0428	10.0968	10.2628	10.57	10.6895	10.5632	10.6364	9.41419	10.102	10.0945	10.1351	10.6714	10.1039	9.45172	10.6822	10.1784	10.2165	10.7165	10.0799	10.5971	10.1371	10.8564	10.0924	10.1272	9.66061	10.8301	10.6783	10.5669	10.0695	9.99803
652	15	59995445	60044261	48816	10.7134	10.6707	10.6682	9.97409	9.97733	10.6501	10.0266	10.6924	8.94316	10.0086	8.75065	10.764	10.7203	10.7488	10.6905	10.0436	10.6846	9.96371	10.6885	10.7153	10.6995	10.6676	8.83673	10.0059	9.91933	9.92368	10.6623	9.99471	8.93263	10.6887	10.7084	10.6966	10.8648	10.0398	10.7295	10.1298	10.8754	10.6724	9.96614	8.9351	10.812	10.8137	10.7176	9.96727	9.98586
653	15	66051348	66054407	3059	9.92655	10.5342	9.89616	10.4997	9.96974	9.86657	9.88367	10.2877	10.3555	9.92372	10.4765	10.039	10.5534	10.4771	9.98902	10.4492	9.97533	9.99904	10.0085	10.5345	9.88178	10.4542	10.0051	10.0964	10.4585	10.4769	10.6419	9.5622	9.97986	9.97794	9.90932	10.0166	10.0229	10.0222	10.4367	10.422	9.98203	10.4089	10.6045	10.4994	9.6067	9.91785	10.0003	10.494	10.4159
654	15	67155975	67185571	29596	9.87895	9.84247	9.79861	9.88149	10.1936	9.90092	9.88565	9.83727	9.81535	9.81687	10.249	10.3373	10.1472	9.77356	9.81947	9.92361	9.76851	10.7476	10.3907	10.353	9.94701	10.3395	10.1612	9.88461	9.85124	10.1817	9.92144	9.74498	10.3048	10.2884	9.80923	9.8907	9.85691	9.78039	10.7406	9.8199	9.83346	10.3412	9.90937	9.78348	9.85343	10.3685	9.84562	9.87474	9.76253
655	15	68444814	68498293	53479	9.49256	9.7916	9.43922	9.46862	9.73667	9.41508	9.40342	9.66639	9.4011	9.37605	9.47259	9.91306	9.793	9.40861	9.47801	9.44873	9.46154	9.83217	9.87564	9.82514	9.74555	9.43824	10.206	9.40002	9.45995	9.46665	9.49082	9.27074	9.80345	9.43382	9.50573	9.45292	9.34964	9.42389	9.40157	9.30915	9.46051	9.75782	9.46763	9.37261	9.44181	9.79425	9.35661	9.40629	9.28517
656	15	91559592	91567072	7480	9.69322	9.69852	10.2275	9.75501	9.68891	9.7508	10.2357	10.2217	9.84309	9.75766	10.312	9.77946	10.3297	9.68281	9.75184	9.74563	9.77577	9.69589	10.6182	10.3183	10.293	9.76357	10.3467	9.7673	9.64184	9.70311	9.73795	10.4764	9.72704	9.68404	9.78342	9.76046	10.6464	9.7082	9.74185	10.3066	9.79578	9.72775	9.67642	9.68261	9.68183	9.7013	10.3032	10.254	10.1291
657	15	95128952	95144563	15611	10.9494	10.5705	10.9488	10.9495	10.9729	10.9524	10.9974	10.9523	10.5631	10.5422	10.9238	10.4783	11.0084	10.5859	10.9601	10.5732	10.9522	10.9114	10.9448	10.9771	10.5513	10.9316	10.9348	10.9734	10.6039	10.943	10.9816	10.6227	10.5573	10.9632	10.9526	10.9861	11.0557	10.9948	10.9364	10.9503	10.5669	10.9981	10.5357	10.5724	10.949	10.5979	10.5621	10.9707	10.972
658	15	97858331	97859240	909	10.5245	10.3748	9.86082	10.5367	9.75714	9.81564	9.81295	10.0886	9.81684	9.77718	9.64528	9.44373	10.3817	10.4456	9.68487	10.373	10.3209	9.49819	9.65845	10.4046	10.2853	9.7826	10.3431	9.59203	10.496	9.78912	10.4284	9.83377	10.4032	9.4878	10.3569	10.3615	9.54956	10.4179	9.81434	9.80389	9.50719	10.4259	9.56735	9.78306	10.4213	9.76196	9.68259	9.84031	10.0893
659	15	100148252	100195778	47526	10.2286	10.5565	10.4866	10.5272	10.5254	10.3135	10.5147	10.2302	10.4815	10.2186	10.328	10.2523	10.329	10.5609	10.5313	10.3255	10.2542	10.5141	10.3468	10.5452	10.529	10.2891	10.5394	10.3257	10.5403	10.5287	10.3317	10.3315	10.3009	10.5145	10.4902	10.5545	10.3898	10.3204	10.2696	9.98983	10.3361	10.0146	10.6039	10.4886	10.5532	10.2425	10.5563	10.3501	10.461
660	16	32184109	32184127	18	10.1007	10.1592	9.98137	10.0381	9.89862	9.00385	10.4866	8.97318	8.89047	10.4835	10.0541	8.94585	10.6309	10.6982	8.97896	10.0915	10.6266	10.6282	10.0349	10.0941	8.97943	10.0872	8.80335	10.1291	10.7221	9.03082	10.1096	9.99004	10.0775	10.0011	10.5347	10.0453	9.03443	10.248	10.0795	10.1128	9.04107	10.6797	10.2015	10.1264	9.15462	9.20582	10.1598	10.6579	10.0151
661	16	36257364	36334363	76999	9.45579	10.2325	10.2279	10.2297	10.2315	9.54105	9.45557	9.51202	10.571	9.47214	9.44503	9.39833	9.44148	9.43942	9.50164	9.53208	9.48963	10.2463	9.49159	9.49058	10.2996	9.56265	10.6496	9.4744	9.50604	10.2186	9.50521	9.54428	9.48346	9.41765	9.42775	10.2399	10.2774	10.215	10.1981	9.4619	10.7558	9.43802	9.44914	9.55396	10.3138	10.2579	10.219	9.49597	9.58849
662	16	39667623	39667660	37	11.0151	11.1819	10.5328	11.2011	10.8831	10.4501	10.7907	10.7993	9.41824	11.0602	10.9981	11.19	11.0355	11.1162	11.0142	11.1063	10.5483	11.081	10.8469	10.223	10.7871	11.1606	10.5597	10.4241	10.5804	11.1049	11.297	10.6596	10.9691	11.1251	10.8867	11.2488	10.4593	10.7955	10.2981	10.1266	10.9819	10.8521	11.2914	10.7337	10.3232	11.1565	11.2314	10.5728	10.9563
663	16	44159384	44159604	220	9.6233	9.82207	9.89632	9.77272	9.77651	9.61893	9.56103	9.67951	9.70873	9.69114	9.60222	10.0672	9.65807	9.774	9.72768	9.58246	9.70785	10.5225	9.68175	9.59532	9.62121	9.59795	9.58348	9.68164	9.60509	9.78904	9.50857	9.68611	9.76016	9.78149	9.70823	9.77025	11.5621	10.5657	11.2664	11.1243	11.6802	11.0126	10.0236	11.2428	11.5065	11.171	9.61125	11.0213	10.6971
664	16	45375511	45390941	15430	9.81694	10.7614	10.364	10.5207	10.4171	9.60282	10.3973	10.6417	10.3051	9.54431	9.40753	9.40179	10.6135	9.61327	9.51138	10.5689	10.556	10.286	9.67389	10.2647	9.924	9.92274	10.4525	10.3033	10.7592	9.63533	9.46918	10.3615	9.94657	10.341	10.5751	10.7594	9.94482	9.37526	9.29321	10.1607	10.0804	9.46722	10.3514	9.73621	10.5176	9.75681	9.39069	10.1739	9.61978
665	16	62626563	62633214	6651	10.6857	10.7531	10.6747	10.5696	10.6071	10.7894	10.6127	10.7468	10.631	10.6429	10.6534	10.6974	10.6368	10.709	10.713	10.7644	10.7318	10.5627	10.7424	10.7293	10.7072	10.6617	10.7319	10.7769	10.7196	10.7323	10.6963	10.676	10.6545	10.6972	10.6293	10.7422	9.62251	10.5982	9.9536	10.0277	9.39891	10.2988	10.5329	9.83492	9.46986	10.066	10.6463	10.2761	10.5817
666	16	70097687	70137600	39913	9.96601	9.80887	9.89565	10.1386	9.99214	9.93589	10.266	10.0339	9.83952	9.97148	10.0859	9.37348	9.96316	9.9953	9.38374	10.1384	9.73286	9.36648	9.41503	9.92381	9.49107	10.1983	9.70821	9.70484	9.81569	10.0765	9.43391	9.63618	10.098	9.97845	9.97338	9.445	9.11183	9.90843	10.0496	9.83927	9.54892	10.0323	9.72174	9.45669	9.7645	9.56397	9.93626	9.85699	9.87869
667	16	72099380	72103464	4084	9.56408	9.49888	10.1297	9.47186	10.1062	9.55776	9.46724	9.64484	10.0478	10.0608	9.39103	10.1853	10.2073	10.2204	10.7309	9.71137	9.53739	10.0939	10.6982	9.5092	10.5614	9.56039	10.7726	10.2267	9.55638	9.59793	10.7508	10.1953	10.1182	10.0995	10.0111	10.055	10.6287	9.60127	9.51385	9.53674	10.766	10.1336	10.198	10.8437	10.1938	10.2304	10.3534	10.2063	10.1305
668	16	82784724	82800887	16163	10.0591	10.1034	10.0309	9.98674	10.0457	9.59113	10.0387	9.98202	10.3856	10.0317	10.5688	10.5115	10.577	9.50295	10.0002	10.4971	9.51591	9.48222	9.55053	10.4988	10.495	10.0896	9.45913	10.5778	9.62966	10.048	10.1164	10.0975	10.4119	10.5064	10.3888	10.0387	10.0884	10.1157	9.90824	9.43964	9.87512	9.43768	10.097	10.3046	9.48747	9.98612	10.6418	10.504	10.3656
669	16	83059531	83101057	41526	10.52	10.5086	10.5059	10.5437	10.4697	9.89048	10.4876	10.4456	10.8902	10.5301	10.8494	10.8631	10.9056	9.94347	10.5542	10.8909	10.0347	9.78354	9.94433	10.8575	10.8106	10.5552	9.89102	10.7809	9.88566	10.494	10.4336	10.5646	10.9313	10.8266	10.8925	10.5139	10.3994	10.4321	10.2541	9.76946	10.1839	9.88825	10.4158	10.7229	9.49079	10.2971	10.783	10.5555	10.7189
670	16	90821219	90821219	0	10.8714	11.6947	12.0643	12.2877	11.5498	11.0466	11.6991	10.7981	11.233	8.34099	11.6165	11.8408	8.47889	11.7114	11.1268	11.7606	12.1306	8.24679	11.1946	11.3301	10.846	11.8286	12.444	11.1655	8.41073	11.4674	11.9305	11.4586	12.228	8.54185	8.56297	8.41563	11.6731	8.52613	12.5953	11.9554	8.48804	11.6389	11.8746	11.8159	11.6486	12.7322	12.0429	12.3999	11.2158
671	17	3865865	3901219	35354	9.98308	10.5234	10.1308	10.0982	10.052	10.0979	10.0699	9.9378	10.0996	9.94137	9.9155	10.1129	10.0854	9.91024	9.94911	9.95052	9.93623	10.1069	10.4911	9.91181	9.9432	10.0645	10.526	10.1011	10.4871	10.1039	10.0853	10.0924	9.94037	10.095	9.8594	9.91505	10.0301	10.0831	10.0836	10.0607	10.131	10.1479	10.6022	10.1071	10.1455	10.1391	9.89115	9.99663	9.94199
672	17	4743771	4743805	34	10.8369	9.09358	10.8643	10.766	10.6989	10.8155	9.23931	10.8454	9.21644	9.02668	8.95007	8.98916	9.02463	10.8923	11.4999	11.4011	9.14901	9.04979	9.09115	10.8265	11.6017	9.26369	9.19381	10.8922	9.14965	9.23804	9.00936	9.18018	11.6524	9.22213	9.07922	10.7524	11.212	9.20194	10.8212	9.13677	11.2242	9.22515	8.96061	9.02367	11.169	8.99673	10.7203	10.8478	11.4374
673	17	6255961	6909183	653222	11.0752	11.5564	11.2614	11.4682	11.4616	11.0325	11.2282	11.1136	11.0062	11.2294	10.7729	11.2842	10.7566	11.1438	11.3704	11.2196	10.8679	11.5997	11.3573	11.0905	11.3801	10.7511	11.252	11.4578	11.3774	11.2477	11.328	11.0531	11.3947	11.5321	10.7598	11.374	11.1621	11.2919	11.5004	10.7916	11.4966	11.2908	11.3412	11.3755	11.4902	11.2973	11.3235	11.1198	11.3723
674	17	7098601	7157189	58588	10.3557	10.8745	10.4644	10.4256	10.4079	10.4811	10.7711	10.8326	10.4153	10.3631	10.3255	10.3608	10.3298	10.8744	10.4428	10.4851	10.8393	10.307	10.8106	10.3428	10.4391	10.4874	10.8496	10.3749	10.4232	10.416	10.309	10.3923	10.3727	10.7803	10.398	11.0334	10.3094	10.3106	10.4673	10.4124	10.3271	10.3576	10.4213	10.8304	10.4166	10.4346	10.4005	10.3595	10.4965
675	17	13259210	13301725	42515	9.96187	10.0592	9.80383	10.4065	10.34	9.86783	9.86874	9.69918	9.85648	10.2679	10.3651	10.4113	9.94259	9.89858	9.89354	9.8256	9.90817	10.4508	10.2887	9.98469	9.87748	9.94349	9.96917	10.3392	10.3766	10.4966	10.361	9.82896	9.84295	10.3152	9.83526	9.97168	10.017	9.89957	10.2993	9.88392	10.6855	10.3559	10.1179	10.3569	10.5308	10.4565	10.0382	10.0822	9.87224
676	17	13398037	13649185	251148	10.6873	10.666	10.3963	11.0721	11.0404	10.6909	10.6723	10.6967	10.6735	11.0282	10.6762	11.0265	10.6295	10.6598	10.6229	10.368	10.5954	11.1161	11.1129	10.6337	10.6379	10.6946	10.6263	11.0535	11.0445	11.0308	10.7113	10.6687	10.6604	10.9836	10.6601	10.6542	10.6786	10.6745	10.6928	10.6438	11.2363	11.066	10.6915	10.999	10.9716	11.0364	10.7022	10.7104	10.7666
677	17	21378620	21419945	41325	10.5772	10.5143	10.8126	10.8782	10.8677	10.4324	10.4731	10.4594	10.4904	10.5384	10.538	10.6231	10.6204	10.4914	10.5401	10.8343	10.5729	10.5936	10.808	11.097	10.5945	10.3567	10.5419	10.7684	10.7837	10.5764	10.5225	10.4894	10.5259	10.6254	10.5935	10.5882	10.5703	10.4991	10.5071	10.6279	10.9643	10.5224	10.688	10.9495	10.9724	10.6775	10.552	10.5505	10.4686
678	17	23102933	23283132	180199	10.6435	10.3773	10.3061	10.363	10.3689	10.569	10.6401	10.8399	10.5731	10.9618	11.0366	10.9866	11.0731	10.6429	10.6676	10.338	10.992	11.0563	10.289	10.3234	10.9441	11.0524	10.6651	10.6275	10.714	10.6377	11.0267	10.9626	10.6823	10.6872	10.9515	10.6316	10.5564	10.8894	10.3839	10.8199	10.1335	10.5118	10.3113	10.2584	10.405	10.9017	10.9518	10.491	10.4135
679	17	27427669	27585674	158005	10.8101	10.4733	10.6988	10.8134	10.7889	11.0095	10.997	10.5788	10.6467	10.812	10.8062	10.4742	10.6854	10.9385	10.8124	10.463	10.9682	10.4888	10.8075	10.4897	10.9596	10.6062	10.4522	10.7962	10.7668	10.863	10.5158	10.7113	10.7566	10.523	10.7689	10.8085	11.0043	11.0028	10.5797	10.5702	10.468	10.7812	10.5603	10.6956	10.383	10.6806	10.8191	11.0239	10.6196
680	17	30582926	31058945	476019	10.8798	10.4207	10.3936	10.6951	10.6747	10.8343	10.6378	10.5842	10.3897	11.0115	10.6896	10.9094	11.1712	11.1588	11.0264	10.6453	10.8383	11.0636	10.8436	10.6773	10.8291	10.8544	10.8895	10.6891	10.8882	11.0054	10.8984	10.3638	10.8484	10.4107	11.11	11.1498	10.952	11.0442	10.4089	10.4082	10.9019	10.6437	10.4204	10.8611	10.8684	10.6604	10.8934	10.65	10.9154
681	17	31987684	31988529	845	9.75689	10.3941	10.7113	9.84684	9.89735	10.4594	9.89479	10.0874	10.4458	9.88185	9.96807	10.416	10.4246	10.4563	10.762	10.8056	10.4328	10.4589	10.4252	10.4588	9.93152	10.4982	10.429	10.3691	10.4571	9.93848	10.711	10.4492	10.6521	9.96685	10.4783	9.95519	9.79174	10.4095	10.6122	10.4012	10.352	9.80474	10.653	9.80456	9.76739	9.79782	9.69195	9.70504	10.6234
682	17	32776807	32785160	8353	9.08041	10.4934	10.4592	9.15364	9.10606	10.3206	9.0614	9.21073	10.3316	9.63419	9.03344	10.5584	9.68949	9.68885	10.4758	10.5412	9.71048	10.4291	10.3436	10.3517	9.12961	10.3927	10.4474	10.3796	9.7276	9.07844	10.5133	10.3434	10.8475	9.72085	9.70976	9.70677	9.1099	9.71733	10.9083	10.4435	10.3816	9.18867	10.8928	9.14582	9.72942	9.73816	9.68318	9.19509	10.851
683	17	33066096	33073239	7143	10.3132	10.6019	10.5963	10.2672	10.2571	10.2809	10.588	10.5468	10.2474	10.5965	10.6679	10.6348	10.6185	10.8612	10.6403	10.6254	10.8214	10.6744	10.2956	10.2857	10.2749	10.6529	10.6403	10.661	10.9453	10.6274	10.6414	10.6024	10.2054	10.8363	10.6023	10.8655	10.3011	10.5945	10.2782	10.2745	10.2574	10.617	10.1715	10.5571	10.2362	10.5916	10.8448	10.6431	10.2489
684	17	33712337	33713456	1119	10.5952	10.6271	10.5505	10.5865	10.6015	10.5617	9.94082	10.0103	10.9908	10.571	9.93252	10.6928	10.6968	9.98519	9.93071	9.85086	9.95245	10.6526	10.6409	10.0146	10.5661	10.6404	10.6817	10.7438	9.91262	9.96452	10.6342	9.94171	10.5551	9.93549	10.6482	10.0219	10.8052	9.88353	10.8375	10.4255	10.4027	10.5767	11.0173	10.3512	10.206	9.9161	10.5856	10.4968	10.4025
685	17	34521273	34521839	566	9.23994	9.2757	9.33958	9.30973	9.24228	10.5978	10.488	10.5333	9.28842	9.22608	10.4947	9.14168	9.12837	10.5857	10.5672	9.3889	10.6179	9.09906	9.30037	9.18194	9.32545	10.5062	9.17317	9.19294	9.2495	10.5632	9.22092	11.0887	9.29645	10.5818	9.22939	10.5594	9.30255	9.14513	9.29155	10.0508	9.15178	10.2894	9.2685	9.98733	9.25662	9.32852	9.12518	10.1315	9.53471
686	17	34644200	34650995	6795	9.45263	10.2462	10.2159	9.45209	9.40901	9.5665	9.37053	9.60285	9.47742	10.2405	9.31467	10.6774	10.2319	10.2311	10.2395	10.7646	10.3409	10.1873	9.46119	10.2508	9.52321	9.48065	10.2903	10.2481	10.7567	9.52541	10.2041	9.55841	10.264	10.2299	10.2231	10.2859	9.32827	10.0521	9.41564	9.4639	9.99601	9.37585	9.31999	9.37827	9.39768	10.0757	10.0806	9.4092	10.1526
687	17	35482411	35482653	242	9.95219	10.4327	10.1502	9.98851	9.89569	9.77503	9.7553	8.8995	10.122	9.76653	9.93887	10.3616	9.84149	10.266	10.3222	10.1858	10.2091	10.446	9.92834	9.08343	9.86492	9.86915	9.93291	10.3581	10.4295	9.81893	9.96618	9.77616	10.279	9.81736	9.7615	9.82406	10.4581	9.89579	10.2391	9.70691	10.0594	10.2257	10.3754	10.372	10.2295	9.97631	10.3557	9.81697	9.65826
688	17	35565259	35576419	11160	10.065	10.427	10.3996	10.1036	10.1173	10.1458	10.0285	9.6672	10.4005	10.0776	10.0918	10.8823	10.0807	10.4498	10.4859	10.8727	10.4417	10.3676	10.0483	9.55924	10.1132	10.1745	10.064	10.8626	10.9427	10.1444	10.0395	10.072	10.3779	10.0522	10.0227	10.1399	10.5314	10.1117	10.4003	10.0589	10.21	10.3533	10.3293	10.402	10.2431	10.6454	10.8334	10.1201	10.1772
689	17	36151872	36151991	119	10.1666	9.02235	8.98008	10.0608	10.1535	10.0418	10.2464	10.587	8.75086	10.0934	10.0647	10.0994	10.0364	10.0522	8.85934	10.0499	8.83627	8.96099	10.2602	10.7031	10.1214	10.1654	10.0545	10.2474	10.1398	10.2044	10.1619	9.99999	8.75881	10.1843	10.0505	10.1272	8.95493	10.1466	8.86549	10.1444	10.196	8.77608	9.03423	10.0372	10.1723	10.7494	10.024	9.95873	9.91433
690	17	36167127	36248347	81220	10.1216	9.77077	9.87865	10.0808	10.0952	10.2931	10.1428	10.4962	9.88155	10.2803	10.2578	10.0748	10.1103	10.1483	9.75689	10.1675	9.78112	9.71917	10.1453	10.4312	10.1312	10.3076	10.2651	10.2706	10.2398	10.1422	10.271	10.2781	9.85588	10.2632	10.2992	10.2932	9.73958	10.099	9.81367	10.2971	10.2509	9.79371	9.76615	10.1643	10.1076	10.3237	10.147	10.2733	10.3362
691	17	36257749	36302789	45040	10.1256	9.77985	9.82133	10.1331	10.1578	10.0828	10.1213	10.2934	9.80535	10.0121	9.998	10.1556	10.1678	10.187	9.74076	10.2107	9.77022	9.73013	10.169	10.3029	10.1894	10.0391	10.0014	9.99305	10.0248	10.1712	10.0264	10.0657	9.78072	9.96502	9.99737	10.0214	9.72452	10.1659	9.82576	10.0243	10.0006	9.80098	9.78238	10.2184	10.1634	10.4153	10.1977	10.0784	10.1242
692	17	41139041	41176614	37573	10.5543	10.6422	9.98559	10.0308	9.96571	10.4137	9.44492	9.93524	10.5351	10.6158	10.0086	10.6472	10.588	10.0807	9.97678	10.5243	9.47068	10.0945	9.95797	9.97047	9.99314	10.4581	10.6084	10.4982	10.1054	10.5419	10.5294	9.64223	10.5428	10.5503	10.488	10.5563	10.4982	9.48719	10.5354	9.96762	10.0423	9.98364	10.6424	10.5463	10.6082	10.055	10.5782	9.93761	10.4552
693	17	43655463	43661943	6480	10.4346	9.62425	10.0501	10.3994	10.4466	10.0698	10.4605	10.1667	9.73889	10.4841	9.97567	9.59292	10.0209	10.5664	10.5338	10.048	10.4085	10.4608	10.3641	10.4228	10.4681	10.0725	10.0551	10.5367	10.0332	10.0605	10.0221	10.4088	10.0004	9.57926	10.0875	10.5588	10.5186	10.5494	9.75908	10.3395	10.4876	10.3802	9.58653	10.4194	10.1505	10.0071	9.98523	10.0084	10.0763
694	17	43822177	43822413	236	11.065	9.63164	10.4595	10.4768	10.453	10.4292	10.5118	9.623	9.50307	11.0498	10.5074	10.5752	10.5553	11.0177	11.016	10.5319	10.9822	11.0416	10.5209	10.5522	10.4268	10.5048	10.5234	10.9817	10.515	10.5078	10.5201	10.9482	10.4746	9.50149	10.4508	10.9846	11.0878	11.0229	9.44161	10.9925	11.007	11.0815	9.53646	10.9245	10.3669	10.4163	10.476	10.467	10.4375
695	17	45324397	45349233	24836	10.649	9.88521	10.7698	10.6707	10.6773	10.9747	9.95787	10.6491	9.99781	10.7714	10.8315	9.88694	10.8925	11.0261	11.01	10.5929	10.9588	10.6576	10.5622	10.3857	10.0127	10.7206	10.6979	9.90619	10.9701	9.94751	9.91322	10.6849	9.92139	10.6276	10.5772	9.88725	11.1356	11.0798	9.95851	11.014	10.9748	10.5988	9.8526	10.8526	10.6549	9.99145	10.7428	10.619	10.8058
696	17	47888395	47889838	1443	10.1966	10.7491	10.1729	10.1602	10.2082	10.2255	10.2838	9.5788	9.49435	10.0941	10.2257	10.1209	10.5321	9.97806	10.1645	9.45259	9.44241	10.1189	10.1889	10.6305	10.0885	10.4545	10.6814	9.48967	10.127	10.2499	9.50502	9.50973	9.41887	10.176	10.3028	9.50212	9.46888	9.94061	10.2416	10.3695	10.2979	9.46221	10.8288	10.6184	10.9342	10.2156	10.1321	10.0133	10.6964
697	17	49818440	49818487	47	10.8464	10.9126	10.6832	10.7026	10.9204	10.7868	9.93974	10.2089	10.1909	10.8352	10.0917	11.0121	11.0083	11.1363	11.0186	10.2872	10.9289	10.0965	10.8106	10.9622	10.1778	10.7584	10.8265	10.1244	10.8169	10.7938	10.0631	8.54446	10.1649	11.07	10.9627	10.8337	10.916	11.0428	9.85709	10.7493	10.7222	9.89977	11.0409	10.7525	10.6453	10.8371	10.1051	10.0585	10.7477
698	17	50132851	50143591	10740	11.1927	10.7395	10.7401	10.7695	10.71	10.7179	10.5886	10.8447	10.9794	11.0864	10.6244	10.0285	11.139	11.0805	10.6876	10.9989	11.1056	11.1822	10.739	10.7254	10.7397	10.0524	11.1024	11.1179	11.1358	10.7521	10.7802	10.9858	11.0381	11.1459	10.7141	10.7892	11.2171	11.1812	10.5491	11.1098	11.2006	11.0301	9.99324	11.1411	10.7908	10.7487	11.1008	11.0787	11.0704
699	17	50703622	50708249	4627	9.60844	9.40352	9.39364	9.34453	9.35932	9.31008	9.29331	9.44262	9.43265	9.49475	9.41852	9.6735	9.65993	9.62421	9.32789	9.55929	9.67033	9.91054	9.36609	9.44725	9.41335	9.55377	9.58774	9.49952	9.70144	9.39343	9.42055	9.56517	9.60924	9.72014	9.38655	9.36536	10.3756	9.89118	9.84397	10.1574	10.4527	9.8569	9.70892	10.0942	10.0613	9.90699	9.46182	10.1126	9.83206
700	17	52525043	52562891	37848	10.1112	10.0981	10.0363	10.0276	10.0594	9.91394	10.0032	10.3695	10.0473	10.0489	10.0893	10.5308	10.3679	10.0311	9.86339	10.4697	10.0641	10.1033	10.4776	9.90972	10.1234	10.0027	10.0175	10.1159	10.1127	10.055	10.0995	9.89861	9.85645	10.373	10.3116	10.0474	10.1019	9.98763	9.95556	10.0849	10.2059	9.91651	9.87255	10.1235	10.198	10.5391	9.98091	10.061	10.4148
701	17	53145663	53184954	39291	10.1986	10.2787	9.94038	10.6217	10.5846	10.5606	10.2521	10.1753	9.93095	10.546	10.1941	10.5713	10.6092	10.1592	10.1919	10.6042	10.1696	10.5669	10.1735	10.1862	10.225	10.2293	10.276	10.0863	10.6021	9.97523	10.566	10.1492	10.2174	10.5526	10.5209	10.1589	10.5699	10.0623	10.1579	9.97047	10.7165	9.98646	9.94662	10.2532	10.0131	10.304	10.1218	10.1549	10.5088
702	17	54423215	54423500	285	10.9587	11.125	11.0434	10.8049	10.8361	11.1472	9.49158	10.9881	11.0206	11.2133	9.41154	10.7387	11.2441	11.0632	11.0951	11.0467	11.0712	11.2943	9.2708	11.284	9.41437	11.0587	11.17	11.162	11.0589	10.7194	11.1399	11.0563	10.7248	11.3031	11.1915	11.3258	11.2628	11.0974	11.0242	11.1386	11.0883	10.7137	11.4562	11.3292	11.1173	10.7661	11.1063	10.6843	10.8137
703	17	69208113	69208347	234	10.2257	10.2124	10.8577	10.7828	10.8825	10.8488	10.8399	10.3095	10.7753	10.783	10.7518	8.92454	10.13	10.7704	10.7289	10.8354	10.7391	10.6806	8.95739	10.7898	10.8019	10.8168	10.7793	10.8681	10.7906	10.8019	10.2354	10.2564	10.7137	10.7946	10.2815	10.623	10.457	10.6829	9.00811	9.87531	9.75895	10.5687	10.2478	10.3161	10.2329	9.88923	10.2255	10.3737	10.1072
704	17	70419780	70420015	235	11.2085	11.3177	11.1606	11.2315	11.1839	10.538	10.5487	11.1151	10.5948	10.5945	9.30958	11.3247	11.2439	11.2963	10.6359	10.669	11.1785	10.6778	11.2325	11.1872	11.1102	11.1225	9.49501	10.6345	10.5911	11.2567	11.2372	10.523	11.2158	11.1918	11.0612	11.2214	10.9636	11.4069	11.2369	11.2822	10.941	9.52393	11.2831	10.5353	10.8907	11.1985	11.3446	11.3329	10.6829
705	17	70731388	70734298	2910	10.5139	11.0235	10.4521	10.54	10.4975	10.3971	11.1336	10.502	10.4364	11.1561	11.1473	10.5533	11.1514	10.4717	10.5641	10.6155	11.0486	11.2189	10.9668	10.971	10.5014	10.5138	11.1648	10.4227	10.6106	10.389	10.4586	11.0776	9.61207	9.59433	10.5266	9.49687	10.4775	11.1393	11.1272	10.5345	10.4612	11.0996	10.4524	10.5913	10.3926	10.5019	11.1084	9.67406	11.0802
706	17	72689319	72703908	14589	10.2618	9.78826	10.3305	9.79889	10.202	10.2748	9.8511	10.4496	10.2557	10.1972	10.3126	10.2927	10.2541	10.1388	9.78369	10.291	10.6258	9.81114	10.188	10.3329	10.084	10.3174	9.80993	10.3036	10.2088	10.2515	10.3171	10.1615	9.79952	10.2601	10.6447	10.7365	10.4111	10.2858	10.2828	10.619	10.8033	10.7025	10.2532	10.3265	10.3874	10.2933	10.2904	10.679	10.1573
707	17	74806574	74808253	1679	10.1112	10.5062	10.2699	10.4348	10.5158	10.0017	10.4306	9.93185	10.0296	10.1949	10.5964	10.2499	10.2849	10.5506	10.4625	10.0431	9.36057	10.5507	10.3846	10.2095	10.4947	10.2178	10.5542	9.41285	10.2	10.443	10.2134	10.5113	10.269	10.2816	10.1012	10.1661	10.0533	10.0994	9.90876	9.86023	9.38647	10.2436	10.2899	9.39456	10.3122	10.1091	10.4961	9.42871	10.1268
708	17	76673848	76684159	10311	10.0581	10.1753	10.1592	10.6154	10.1239	10.0563	10.5681	9.81037	9.97202	10.0447	9.42707	9.81856	9.52474	9.51486	10.6065	9.90577	10.0718	10.6127	10.0737	10.562	10.0316	9.53134	10.134	9.86787	10.1104	10.121	10.6256	10.1496	9.8325	9.79686	10.0921	9.52255	9.7606	10.1552	10.0161	9.86086	9.89241	10.1385	10.0191	9.87827	10.2187	10.0754	10.1207	10.6022	10.4487
709	17	80443846	80449220	5374	10.2633	9.98899	10.1414	9.86804	10.1308	10.185	10.1588	10.0907	10.1595	10.1976	9.9275	10.3737	9.98978	10.2108	9.95524	9.89418	9.88588	10.2638	9.90477	9.94066	9.86129	9.8775	10.273	9.49426	9.96617	9.89953	10.2736	10.1766	9.88412	9.88922	10.1784	9.92771	10.235	10.3461	10.0047	10.3077	10.019	9.9968	10.3291	9.90099	9.51816	10.0464	10.3276	9.6697	9.92045
710	17	82353226	82354184	958	10.6348	10.0829	10.7098	10.6973	9.86887	10.7226	10.6578	10.6383	10.7296	8.26974	10.7626	10.0959	10.8172	10.8162	10.8368	10.7383	10.6965	9.98369	10.0192	10.7073	10.7565	9.96317	10.8279	10.0237	10.794	10.688	10.7123	10.7247	9.95531	10.8097	9.84388	10.7421	10.1173	10.1619	10.8049	10.8864	10.0873	10.0915	10.1465	10.0264	10.9068	10.1425	10.8676	10.8577	10.458
711	17	85125658	85126027	369	10.5662	10.5894	10.1018	10.231	10.1521	10.1493	10.1412	9.5473	10.1032	10.1368	10.1563	10.6201	10.6661	10.5804	10.1685	10.1563	10.1855	10.4795	10.1521	10.6451	10.4825	9.55776	10.2261	10.147	10.5852	10.5395	10.5741	9.56073	10.1378	10.6291	10.5219	10.0866	9.49594	10.0459	9.9902	9.76981	9.64243	9.92655	10.6128	9.98086	9.75594	9.72884	10.6581	10.1265	10.221
712	17	87411269	87421277	10008	10.7251	10.3393	10.6874	10.7569	10.7844	10.3319	10.2437	10.6412	10.7146	10.7727	10.7771	11.2934	11.3778	10.8322	10.7406	10.8288	10.7887	10.7888	10.2273	10.2192	10.7433	10.7589	10.3626	10.7702	10.2758	11.1091	10.7473	11.2302	10.3301	10.7944	10.7569	10.2953	10.7329	10.8059	11.1383	10.2919	10.7119	11.1184	10.7096	10.8397	10.8201	11.212	10.785	11.1421	10.6394
713	17	88952743	88963711	10968	10.3489	9.6632	10.2408	10.0008	10.0415	9.64796	10.0548	10.013	10.0323	10.323	10.0764	10.4175	10.0769	10.0968	10.3741	10.352	10.056	10.1106	10.0563	10.3278	10.3511	10.2533	10.0616	10.1221	10.4877	10.3546	9.69383	10.0549	9.63616	10.3173	10.044	9.66923	10.3717	9.71933	10.3526	9.58207	10.0001	10.362	10.3552	10.0561	10.3356	10.4215	10.1035	10.0447	10.0171
714	17	92827951	92923001	95050	10.1378	10.6455	10.5253	10.2077	10.1478	10.4906	10.1551	10.4485	10.5891	10.1236	10.6622	10.1667	10.7013	10.1405	10.1357	10.5915	10.5749	10.1697	10.5953	10.1798	10.1787	10.1948	10.6152	10.1665	10.1212	10.5526	10.0847	10.1789	10.661	10.6458	10.0956	10.1254	10.1074	10.5858	10.064	10.6224	10.2745	10.5352	10.6635	10.755	10.3251	10.2317	10.1501	10.5293	10.4362
715	18	8199910	8205008	5098	10.7348	10.8289	9.43889	10.821	10.8382	10.7221	10.6921	10.2181	10.7963	10.8211	10.3074	10.433	10.8809	10.753	10.3239	10.7363	10.3596	10.8912	10.4285	10.8489	10.8639	10.8439	10.3859	10.2437	10.2637	10.8097	10.8614	10.6386	10.8815	10.9124	10.8338	10.8582	10.7444	10.8498	10.8877	10.887	10.4063	10.2839	10.9066	10.4133	10.9971	11.0258	10.8346	10.8677	10.167
716	18	11268641	11308509	39868	9.91778	10.7212	9.83367	10.5894	9.79754	9.80269	10.561	10.1508	10.1599	10.1659	10.2388	9.88426	9.86072	10.1719	10.1789	10.2536	10.2211	10.2365	10.2383	9.83699	10.1702	10.2256	10.1778	9.86335	9.81592	10.1434	10.2249	10.1446	10.1757	9.81369	10.17	10.1833	9.997	9.94768	10.2828	9.98647	10.3993	9.94916	10.7252	9.85462	10.4061	10.2989	9.91486	10.2776	10.2279
717	18	12384760	12387394	2634	10.5095	10.8344	10.8688	10.285	10.2925	10.4554	9.97922	10.845	10.3547	10.3716	10.8773	10.8576	9.85548	10.4462	10.8663	10.4192	10.4051	10.4033	10.8405	10.5204	10.3332	10.3252	10.469	10.4891	10.9099	10.4335	10.4568	10.0689	10.4057	10.379	9.88574	9.83768	10.2266	10.4637	10.7514	10.2768	10.2133	10.8768	10.7985	10.2187	10.1436	10.2025	9.89441	10.8118	10.3419
718	18	28685988	28686474	486	10.3207	10.8521	10.6828	10.4758	10.3794	10.7324	10.4082	10.6845	10.3306	10.7295	10.8218	10.7613	10.9009	10.846	10.8185	10.8086	10.7375	10.7827	10.7933	10.3014	10.7065	10.3955	10.3398	10.8466	10.4819	10.3795	10.386	10.4143	10.7914	10.802	10.8556	10.3688	11.1158	10.2692	10.7436	10.8077	10.6383	10.228	10.7046	10.8047	11.1066	10.7594	10.782	10.7117	10.6132
719	18	32594220	32604842	10622	9.58395	10.1761	10.2154	10.1346	9.73281	9.86378	10.3397	10.2388	10.1788	9.99138	9.96705	10.1882	10.1625	10.3461	10.3428	10.3158	10.211	10.3	10.3563	9.97956	9.89935	10.3396	9.86805	10.3475	9.99636	9.5644	9.96654	9.89253	10.1708	10.194	10.355	9.83622	10.2318	9.94797	10.0842	10.1322	10.0363	9.96347	10.1822	10.0594	9.70025	10.0644	10.2085	10.1273	10.2163
720	18	43568830	43609197	40367	10.0177	10.079	10.3951	10.3677	10.016	10.4294	10.4013	10.3939	10.4028	10.0701	10.4398	10.3828	10.0529	10.0455	10.4309	9.68401	10.0089	10.042	10.3691	10.4062	10.3866	10.3935	10.0448	10.0433	10.4698	10.4046	10.4198	10.399	10.431	10.0406	10.0422	10.394	9.99083	10.3495	9.96635	9.95969	10.0371	9.99112	10.013	9.98583	10.3605	10.4038	9.55819	10.3669	10.3402
721	18	44715384	44733855	18471	10.0305	10.5386	10.3847	10.312	9.94432	10.3949	10.3779	10.2804	10.3973	9.31	10.0968	10.1415	10.4933	10.3336	10.0073	10.4228	10.4119	10.0414	9.95498	10.4231	10.4846	10.0927	10.3718	10.1129	10.4054	10.4452	10.4129	9.9988	10.4693	10.5361	10.4058	10.3601	10.1342	10.0202	9.92892	10.4495	10.1647	10.426	10.3332	10.0601	10.5261	9.97646	10.4849	10.3373	10.3404
722	18	44814127	44831000	16873	10.3062	10.7981	10.6789	10.7164	10.3827	10.7188	10.6669	10.5761	10.6161	9.84374	10.3919	10.3519	10.7541	10.7053	10.3727	10.7013	10.667	10.3869	10.3513	10.7841	10.6488	10.2501	10.7023	10.3625	10.7723	10.6167	10.8133	10.2953	10.6737	10.7286	10.687	10.7148	10.354	10.3417	10.3443	10.7589	10.4469	10.7081	10.8921	10.4395	10.8753	10.458	10.8201	10.8545	10.7498
723	18	57820265	57902448	82183	10.4604	11.1273	10.8655	10.8936	10.4562	10.8956	11.2173	11.1627	11.179	11.2295	11.2944	10.902	11.1363	10.8922	11.1218	10.9119	11.0701	11.1136	10.8866	11.2643	11.0828	10.4656	11.1121	11.2282	11.1183	11.1346	11.2948	10.8829	11.2359	11.2255	11.0961	10.9343	11.1512	11.2901	10.9472	11.1353	11.2683	11.2916	11.1741	10.956	10.9462	10.9825	11.1719	10.9859	11.2492
724	18	59506767	59507938	1171	9.59602	9.58514	9.55424	10.3629	9.49518	10.4833	10.4812	9.6447	9.54485	10.465	9.69068	8.44431	9.58053	10.5104	10.3913	10.412	10.4361	10.3942	9.72842	8.52332	9.69233	9.60113	9.6377	10.4126	9.63289	10.4364	8.54375	9.7027	10.324	8.47808	10.3252	10.4089	10.4303	8.59048	9.69287	10.5187	9.6913	10.3717	9.53189	10.4256	8.57494	8.61855	9.77738	8.52584	10.5152
725	18	69835601	69836287	686	10.2054	10.3366	9.99674	10.6942	10.658	10.1721	10.1181	10.0074	10.0309	10.1069	10.3388	10.2881	10.7433	10.6792	10.2559	10.5894	10.218	10.2202	10.116	10.287	10.0281	10.1651	10.2612	10.2608	10.3497	10.1016	10.3043	9.9765	10.2235	10.2431	10.5561	10.2546	9.29551	10.0382	9.34517	9.4331	9.21757	9.63166	10.3604	9.36906	9.03141	9.41731	10.6992	9.55095	10.0917
726	18	70602756	70623157	20401	10.3953	10.1797	10.3929	10.4216	10.404	10.384	10.4093	10.1335	10.4173	10.4084	10.201	10.0905	10.4838	10.424	10.0907	10.1616	10.5196	10.4454	10.1068	10.4359	10.1668	10.4528	10.4687	10.3823	10.3987	10.4181	10.3874	10.429	10.4917	10.2401	10.4659	10.4115	10.4512	10.4219	10.4082	10.2342	10.4762	10.2798	10.3999	10.4643	10.4718	10.0342	9.98554	10.0344	9.68787
727	18	71609676	71611282	1606	10.3082	10.3859	10.5728	10.4966	10.3985	10.19	10.2576	9.8795	10.4609	10.5143	10.4863	10.036	10.6575	10.2705	10.1124	9.90138	10.1883	10.427	9.96654	10.6182	9.98249	10.0627	10.3204	10.0509	10.6915	10.6807	10.2646	10.1848	10.5869	10.6066	10.5958	10.1969	10.1431	10.5466	10.3376	10.1614	10.8853	10.0841	10.3104	10.3704	10.44	10.0735	9.85104	9.86457	9.07106
728	18	72536401	72559030	22629	10.295	10.2824	10.3659	10.2099	10.2636	10.1919	10.2188	9.89201	10.3377	10.3625	10.3464	9.48257	10.2748	10.1874	9.86688	9.84628	10.1841	10.2729	10.0229	10.3766	9.99696	10.4642	10.233	10.4717	10.2922	10.0147	10.3103	10.0718	10.4736	10.2405	10.2261	10.2853	10.2862	10.4212	10.2164	9.92658	10.4441	10.2384	10.3694	10.2861	10.3255	9.53397	9.97549	10.0059	9.49113
729	18	72714633	72727773	13140	10.0203	10.0517	9.97375	10.1141	9.98481	9.95371	10.016	9.53986	9.91268	10.0368	10.0458	8.97745	10.1107	10.1171	9.62374	9.61409	10.0086	10.0888	9.50552	10.0992	9.61701	10.0664	10.1306	10.024	10.1219	9.57985	10.1069	10.1039	10.0217	10.0413	9.97551	10.0625	9.98021	10.0117	10.0083	9.57231	10.136	10.0819	9.98497	10.1587	10.1666	8.87051	9.50463	9.45559	9.04462
730	18	74314441	74314504	63	10.2311	10.5023	10.0802	10.2219	10.3695	10.1121	10.1887	9.33642	10.0784	10.2584	10.3886	9.4796	10.431	10.286	9.41049	9.44906	10.1775	10.3623	9.42646	10.3696	9.48295	10.2733	9.41258	10.4068	10.3131	9.3857	10.2613	10.3044	10.2887	10.3592	10.2432	10.2086	10.2784	10.2133	10.1051	9.44012	10.1861	10.1403	10.3074	10.3335	10.0887	8.49677	10.3412	9.43678	9.4195
731	18	74681698	74696062	14364	10.691	10.7632	10.3189	10.8005	10.7201	10.6522	10.6428	10.1617	10.2102	10.2836	10.7894	10.8538	10.7381	10.2454	10.3099	10.2959	10.7026	10.8911	10.7783	10.7508	10.2383	9.80914	10.7334	10.7441	10.7348	10.4008	10.8256	10.5846	10.3483	10.7256	10.5877	10.8071	10.7631	10.8226	10.8186	10.799	10.8333	10.3657	10.8385	10.3875	10.382	10.4233	10.4481	10.5096	10.3501
732	18	74750012	74750945	933	11.4601	11.3719	10.9377	11.3646	11.3891	11.4035	11.4899	10.9668	10.9547	10.8671	11.456	11.4644	11.4354	10.8906	10.8575	10.9322	11.4174	11.5227	11.4616	11.4488	10.8886	9.81564	11.4413	11.4953	11.4372	10.8869	11.4334	11.332	10.9129	11.4474	11.4257	11.442	11.6083	11.6826	11.6324	11.4731	11.6034	11.1452	11.4383	10.9671	10.9572	10.9153	10.9831	11.1294	11.0927
733	18	75257879	75261870	3991	10.5805	10.5966	10.0449	10.6018	10.6083	10.6084	10.648	10.0624	10.059	10.046	10.6411	10.5933	10.6128	10.0724	10.0785	10.0791	10.5882	10.6201	10.5976	10.6439	10.0395	9.33739	10.6276	10.6094	10.6194	10.0094	10.588	10.5579	10.035	10.6626	10.6376	10.5734	10.708	10.5869	10.4351	10.5537	10.5172	10.0162	10.542	10.5382	9.9423	9.96426	10.0729	9.8663	9.83947
734	18	85052526	85055530	3004	10.0644	10.2196	9.6598	10.3285	9.99017	10.324	10.4622	10.3823	10.0554	9.43417	10.374	10.2385	10.1099	10.1051	10.146	10.0513	10.441	9.92351	10.1958	9.95484	9.99075	9.57365	10.3182	9.15944	9.13901	10.0304	9.96889	9.46381	10.1037	10.3524	10.2287	10.0523	9.45543	9.00788	10.6138	9.4815	10.4905	10.2805	10.5354	10.7762	9.76361	10.2843	10.0624	10.1712	10.5432
735	19	7348368	7349675	1307	10.4352	10.7906	9.79519	9.57735	10.5259	10.3696	10.4448	10.3169	9.76818	10.3586	10.5279	10.4996	10.3901	9.68447	10.4211	10.4562	10.8716	10.5853	9.6911	10.4879	10.4253	10.7709	10.5432	10.478	10.4915	10.3848	10.5246	10.3858	9.78616	10.5297	9.74331	9.69224	10.5151	10.4017	10.3791	10.4632	10.3028	10.7079	10.3789	9.66936	9.748	10.4245	9.56161	9.64625	9.8433
736	19	8566372	8598321	31949	10.6297	10.6812	10.5902	10.7416	10.703	10.1138	10.1674	10.0943	10.046	10.6409	9.06378	10.7254	10.6925	10.6234	10.6335	10.1673	10.0578	10.1116	10.1683	10.1247	10.5834	10.6935	9.19457	10.6882	10.6612	10.6551	10.6546	10.0657	10.7363	10.6883	10.599	10.1051	10.746	10.6505	10.1276	10.1907	10.8427	9.23218	10.1398	10.2995	10.8468	10.7293	10.7435	10.1546	10.1057
737	19	9210938	9398238	187300	10.0587	10.0353	10.0365	9.395	9.38967	9.43003	10.4314	9.52825	10.0303	10.0123	10.4311	10.0802	9.35885	10.4619	10.429	10.0695	9.42418	10.0428	9.43766	10.032	9.49347	9.45006	10.4672	10.0293	10.3947	9.42125	9.36169	9.45698	10.0426	9.37564	10.0657	10.0508	9.95686	9.35988	10.4061	9.38926	9.34545	10.427	10.0335	10.0804	9.42205	10.0736	9.33553	10.0133	9.49034
738	19	11666254	11674336	8082	10.8524	10.9885	10.9023	11.4699	11.5346	11.4435	10.8732	11.3114	11.4107	10.9229	10.9583	11.4631	10.9832	10.9172	10.9008	11.4153	10.8826	10.9459	11.3613	10.9485	11.3715	10.9846	10.9316	10.9472	10.3194	10.8626	10.8995	10.9634	11.438	10.3286	10.876	10.8503	10.067	11.438	11.3154	10.7106	10.5739	11.4206	11.5033	10.2628	11.0804	11.3732	11.4112	10.7884	10.7092
739	19	12220912	12308914	88002	9.35307	10.4984	9.33578	9.92205	9.89174	10.2132	9.31263	10.4273	10.3915	9.27008	9.18443	9.19311	10.2536	9.96515	10.2072	10.3048	10.2407	10.7266	10.2316	9.95142	9.97579	10.705	10.2419	10.7111	10.2418	9.86536	9.20637	10.9193	9.30876	9.22173	10.2271	10.7193	10.1082	10.6501	11.0201	10.1876	10.2244	10.65	9.84055	10.7566	9.82506	9.29616	9.17893	9.85106	9.87812
740	19	13926464	13952598	26134	9.62114	10.4718	10.28	9.83409	9.79313	10.3331	10.3462	10.3391	10.3314	9.67521	10.4105	9.59243	10.484	9.62027	10.4589	10.35	10.3619	10.7564	10.6999	9.61244	9.87765	10.5116	10.443	10.7408	10.4644	9.78707	9.67279	10.4153	10.0181	9.67455	10.3215	10.6497	10.429	10.6776	10.6498	10.3717	10.4442	10.7046	10.48	10.7218	10.4682	9.70973	10.5273	9.60271	9.74382
741	19	14845431	14846370	939	10.4451	10.2886	10.1108	10.5185	10.4647	10.3118	10.385	10.3498	9.92416	10.855	10.8461	10.447	9.91453	10.8608	10.6081	10.391	10.3938	9.9718	9.81985	10.6446	10.4026	10.7822	10.6046	9.92633	10.5458	10.5317	10.6054	10.7614	10.7861	10.4767	10.3861	10.4576	10.5618	9.48461	10.7307	10.5209	10.4706	9.98438	10.394	10.0684	10.398	10.6178	10.6725	10.5384	10.8869
742	19	15223352	15236075	12723	10.1512	10.5104	10.2107	10.2007	10.1392	9.99236	10.1323	10.0513	9.9976	10.403	10.4753	10.2866	9.97048	10.518	9.9891	10.0204	10.0073	9.95139	10.011	10.119	10.2198	10.4779	10.4982	10.0722	10.4975	10.1464	10.1413	10.4873	10.0117	10.1452	9.9957	10.4348	10.5867	9.66655	10.2354	10.096	10.1721	9.99508	10.1087	10.0928	10.5779	10.2927	10.5162	10.1175	10.0936
743	19	18618198	18644452	26254	9.86473	10.8211	9.31507	10.6087	10.6828	10.4406	10.01	10.2928	10.326	9.95533	10.574	10.1561	10.5442	9.99937	10.6388	10.4673	10.3992	10.1418	9.94151	10.5534	10.4934	10.4666	9.97715	10.4713	10.4648	10.4479	10.7241	10.4343	10.5714	10.5386	9.86895	10.4905	10.5263	10.5613	10.6571	10.492	10.6936	10.3576	10.807	10.4962	10.73	10.1995	10.5295	10.4999	10.3877
744	19	19959182	19972780	13598	10.2471	10.2925	10.1974	10.2866	10.2077	10.1852	10.0805	10.0072	10.1033	10.1661	10.2322	10.1997	10.5445	10.1669	10.2478	10.1029	10.3271	10.4963	10.3503	10.212	10.2026	10.1506	10.2225	10.1327	10.1711	10.2208	10.3587	10.53	10.1872	10.368	10.2626	10.1504	10.1304	10.2106	10.5587	10.2997	10.5223	10.2648	10.8942	10.7306	10.4936	10.2891	10.6905	10.1988	9.83149
745	19	20020406	20021069	663	9.76148	8.54366	9.64172	9.66479	9.77457	9.76076	9.6962	10.2572	10.2524	10.4175	9.70205	10.5432	10.3982	10.3821	8.50884	10.3356	10.3503	10.4856	10.6499	10.3961	9.80243	10.3465	10.4365	9.91567	9.82804	9.70167	9.72208	10.4091	9.79408	10.0079	10.389	9.75199	9.80201	9.74191	9.65374	8.48713	10.6389	10.2015	9.74232	9.63462	9.95181	10.3314	10.4053	9.6625	10.2198
746	19	22260383	22278255	17872	10.6703	10.3953	10.708	10.7922	10.8036	10.6611	10.7375	10.2983	10.364	9.90297	10.3301	10.3919	10.4447	10.3705	10.2273	10.3844	10.7567	10.7651	10.7328	9.74257	10.7481	10.278	10.412	10.2584	10.336	10.3286	10.3122	10.0153	10.436	10.4164	10.7061	10.7883	10.3714	10.6971	9.8934	10.338	10.4708	10.3255	10.8014	10.0319	10.0901	10.5209	9.92823	9.88906	10.2618
747	19	26846010	26846087	77	9.60686	10.6793	10.5939	11.067	11.0862	10.5047	9.39406	9.22729	10.7191	10.754	10.8507	10.8726	10.7972	9.5922	10.6948	10.6125	10.687	10.7863	10.5236	11.2999	11.1899	11.1725	10.9116	9.48856	10.6758	10.6371	11.2144	11.162	10.6521	9.53855	9.20161	9.43185	9.62651	9.36745	10.1282	9.88413	9.84738	10.4414	11.2638	10.4827	10.0979	10.065	11.059	10.3036	9.35678
748	19	33386117	33438568	52451	10.6781	10.3757	10.6989	10.3047	10.2693	10.7191	10.2647	10.6939	10.7004	9.63373	10.5405	10.7494	10.7396	10.3124	10.7044	10.2312	10.6911	10.7104	10.7725	10.5998	10.71	10.2376	10.7126	10.2881	10.7738	10.1438	10.3078	10.7627	10.3507	10.1529	10.6568	10.709	10.0507	10.2105	10.6274	10.5794	10.0426	10.6555	10.6411	10.2251	10.4513	10.7252	10.2418	10.6894	10.2942
749	19	33521544	33634022	112478	10.3532	10.0733	10.3157	10.0447	10.0508	10.3088	10.0146	10.269	10.2973	9.58726	10.1351	10.4141	10.4317	10.056	10.3809	10.0262	10.3994	10.3866	10.3721	10.299	10.3303	10.0708	10.3877	10.0929	10.3759	9.91679	10.0779	10.3333	10.1043	9.90463	10.389	10.3969	10.0832	10.0305	10.3661	10.3812	10.1653	10.3334	10.3291	10.143	10.4147	10.4601	10.0874	10.3655	10.0175
750	19	34662998	34681285	18287	11.1492	10.6921	10.8123	10.3214	10.2859	11.1158	10.5996	10.5088	10.8156	10.5756	11.1864	10.8916	11.1879	10.3297	10.881	10.6642	11.1041	10.8143	10.8889	10.8782	10.8504	10.3578	10.6489	10.3162	10.9662	10.6627	10.6562	10.5735	10.3258	10.5907	10.8775	10.8638	10.7503	10.643	10.8698	11.1146	10.7309	10.8505	10.8255	10.5818	11.2101	10.8852	10.237	11.1159	10.5967
751	19	35071034	35142532	71498	10.7118	10.3056	10.7201	10.2731	10.2893	10.6163	10.2692	10.6699	10.6347	10.1018	10.6859	10.7129	10.7104	10.3081	10.6972	10.2885	10.6424	10.7421	10.6641	10.2932	10.6883	10.2963	10.2848	10.3103	10.6764	10.2528	10.3039	10.3008	10.2975	10.2644	10.7133	10.6801	10.2933	10.299	10.6701	10.6839	10.2932	10.6891	10.6722	10.1362	10.7092	10.7305	10.2524	10.6817	10.6179
752	19	35148473	35148919	446	9.34577	10.1198	9.33926	10.0824	10.0858	9.38114	10.0912	9.47138	9.35959	10.5133	9.3259	9.40449	9.34911	10.0754	9.3634	10.0288	9.41283	9.33951	9.27113	10.0499	9.407	10.02	10.0408	10.1048	9.39484	9.87834	10.0844	10.0176	9.95116	9.97638	9.36182	9.38726	9.84111	10.0428	9.05703	9.05487	9.6601	9.24794	9.28113	10.3837	8.96319	9.16259	10.0627	9.14435	9.19394
753	19	38127355	38132440	5085	9.80214	9.81155	9.85093	10.3541	9.81782	9.87773	9.8399	9.87919	9.81571	10.7656	9.81303	9.79121	9.83003	10.4369	9.82342	9.84675	9.80351	9.80091	9.81946	9.83595	9.83089	9.80382	9.85017	9.82484	9.80508	9.76704	9.80291	9.88732	9.83014	9.84823	9.77304	9.81161	9.68417	9.73625	9.79579	9.82913	9.77802	9.85203	9.76217	9.83303	9.77874	9.8114	9.75666	9.83042	9.89529
754	19	44133553	44133654	101	10.2484	10.4225	8.86799	8.98006	10.3246	10.7639	8.84889	9.98158	8.84652	10.3927	10.3503	8.98736	8.77955	10.3587	8.82257	10.8184	10.3099	8.89881	8.96915	10.3677	8.95695	10.8997	10.401	8.78723	8.91949	10.2184	10.4067	10.3021	8.98173	8.91603	8.93915	8.89497	8.83466	8.86117	8.75931	10.3454	10.4718	10.8156	8.75916	8.90881	10.4601	8.90062	10.3366	10.8367	10.08
755	19	44222802	44223055	253	11.0292	10.9838	9.77373	9.79637	11.1106	11.2254	9.74721	10.8115	9.7927	11.061	11.008	9.66292	9.68776	11.0337	9.69094	11.3484	11.1152	9.74006	9.65977	11.0269	9.7772	11.3868	10.9893	9.72683	9.81238	10.926	11.0598	10.982	9.7639	9.70452	9.74819	9.6441	9.60583	9.64866	9.56737	10.9565	11.1052	11.406	9.66362	9.81143	11.0238	9.72309	10.9255	11.2692	10.8345
756	19	50825237	50868798	43561	10.3112	10.5891	10.5376	10.338	9.98186	10.668	10.2204	10.5644	10.5376	10.6174	10.2985	10.5889	10.6646	10.5244	10.6041	10.3601	10.6224	10.5995	10.5532	10.4703	10.5585	10.5202	10.3877	10.5702	10.5603	10.2416	10.5164	10.483	10.5091	10.2948	10.4987	10.5117	10.3728	10.5754	10.4757	10.4862	10.1889	10.634	10.5916	10.5635	10.6097	10.4937	10.4941	9.93922	10.1588
757	19	52231855	52248556	16701	9.5349	9.24509	9.35582	9.46243	9.49163	10.0567	9.40876	9.42644	8.66948	9.54989	10.1697	9.5804	9.81884	9.75086	8.60382	9.78369	9.50513	9.80424	9.33742	9.50129	9.21891	9.45385	9.99728	9.89674	9.79627	9.33875	9.76383	9.21416	9.66758	9.38321	9.56229	9.41554	9.79768	9.2131	8.65584	9.31661	9.59839	9.94318	9.80387	9.22074	9.92314	9.37809	9.35338	9.86545	9.04576
758	19	52346092	52353968	7876	10.6125	9.99102	10.0008	10.5994	10.5475	10.6478	10.582	10.0018	9.55152	10.5048	10.6622	10.6101	10.682	10.6883	9.43413	10.6445	10.5885	10.6452	10.5432	10.6353	10.0597	10.5745	10.6901	10.6204	10.6199	10.0207	10.6245	10.0006	10.5863	10.0022	10.5418	10.5455	10.5133	9.96486	9.43585	9.97963	9.88633	10.6669	10.7096	10.0383	10.4822	9.99213	10.0301	10.6722	10.0277
759	19	58755311	58769822	14511	9.90271	9.74904	9.92902	10.4305	10.0142	9.83102	9.69549	9.66413	9.43946	9.74911	9.76941	10.0712	10.3689	9.94459	10.028	9.78546	9.81542	9.55212	10.2182	9.94176	9.74882	9.91973	9.79427	9.52235	9.77696	9.79159	9.48902	9.92431	9.91623	9.76638	9.90553	9.50528	10.1304	9.78893	9.81004	9.8799	9.96715	9.7708	10.0285	10.4259	9.86698	9.86103	9.8565	9.9635	9.78774
760	19	60848615	60849582	967	10.8644	10.5654	10.4309	10.835	10.4905	10.3914	10.9214	10.0971	10.4965	10.5454	10.5462	10.3008	10.6353	10.213	10.8744	10.8839	10.2015	10.7717	10.5773	10.5347	10.4562	10.6055	10.5462	10.1917	10.7179	10.4498	9.54414	9.55869	10.6186	10.7688	10.5925	9.51739	10.6809	10.9665	10.0788	10.414	10.3683	10.4787	11.0302	10.3003	10.1612	9.52889	10.608	10.7441	10.2678
761	X	132892320	132962355	70035	9.15177	9.11756	9.2905	9.08239	9.11639	9.18344	9.16805	9.34587	9.20193	9.14172	9.02741	9.08493	9.01609	8.97848	9.21212	9.1853	9.18379	8.99487	9.12578	9.1075	9.25265	9.16103	9.03801	9.0806	9.09598	9.13774	9.06099	9.2299	9.10671	9.06192	9.14154	9.08581	8.91355	9.11664	9.07069	9.07302	8.9278	9.14571	9.108	9.06799	8.99424	9.11274	9.06709	9.15135	9.32439
762	X	147048432	147056301	7869	9.70006	10.6866	10.6742	10.7046	10.6584	10.6178	10.6716	9.77346	10.6107	9.73231	10.7111	10.7348	10.8238	9.78033	10.6676	10.718	10.7791	9.67265	9.81193	9.68067	10.7219	10.7245	10.7325	9.65309	10.7416	10.6679	10.7202	10.6953	10.75	10.8011	10.7731	10.7113	9.78496	10.6115	10.6528	10.7649	10.8803	10.7131	9.65719	10.7584	10.7586	10.7452	9.65156	10.5856	10.5176
763	X	154298124	154298522	398	10.2916	10.3238	10.2509	9.12227	10.4175	10.2637	9.07088	10.3529	10.3464	8.97842	10.1873	9.17265	9.12569	9.13484	9.12925	10.5206	10.464	10.3582	9.15207	9.121	10.3526	9.20365	10.4599	10.3041	10.5012	9.09106	9.03557	10.5023	10.3932	10.4107	9.06743	9.09113	9.15979	10.2939	9.28815	10.4114	10.0578	10.2226	10.4172	9.17212	9.98103	9.20592	9.09793	9.11974	9.26897
764	X	166341476	166428718	87242	11.1438	11.3534	11.077	11.2742	11.1738	11.6565	11.2904	11.1631	11.3666	11.1703	11.3108	11.1637	11.578	11.291	11.1003	11.4454	11.1326	11.4914	11.3249	11.5002	11.037	11.1995	11.7582	11.3486	11.6833	11.2463	11.4654	11.31	11.7191	11.2207	11.4444	10.8526	11.3326	11.1521	11.3219	11.6606	10.8359	11.5126	11.2658	11.303	11.4041	11.3775	11.5916	11.3306	11.4378
[truncated: 19 more columns]

## Sheet: b)
	EPM_Perc_time_open_arm	EPM_Time_immobile	EPM_Closed_arm_entries	EPM_Closed_arm_latency_to_first_entry	EPM_Open_arm_entries	EPM_Open_arm_time	EPM_Full_open_arm_entries	EPM_Perc_entries_open_arm	EPM_Total_entries	OF_Distance	OF_Time_immobile	OF_OF_inner_zone_entries	OF_OF_inner_zone_distance	OF_OF_outer_zone_distance	FST_floating_frequency	FST_floating_latency	SRT_Initial_CORT	TST_Immobility_frequency	TST_Immobility_latency
Animal1	51.37	12.6	39	0	40	138.3	2	51	79	20.306	0	3	0.326	19.973	25	66.3	56.56	2	287.8
Animal2	20.29	5.3	20	0	31	61.1	1	61	51	25.077	6.5	13	2.086	23.02	21	50	1	13	63.1
Animal3	14.62	8.1	16	0	30	45.3	0	65	46	13.326	3.5	15	1.973	11.533	24	54.8	1	5	174.3
Animal4	26.92	20.4	29	6.1	34	79.6	5	54	63	29.916	0	26	5.769	24.149	11	63.3	1.76	3	208.5
Animal5	20.01	13.8	18	0	29	58.8	2	62	47	17.209	5.7	4	1.537	15.727	3	91.9	5.53333	4	83.5
Animal6	64.77	5.9	9	0	13	192.5	2	59	22	26.887	5.5	11	1.052	25.833	9	101.9	10.0933	9	105.4
Animal7	28.41	16.8	28	0	29	79.7	2	51	57	29.861	3.6	24	4.354	25.492	25	55.7	13.7533	2	188.5
Animal8	19.33	6.1	29	0.7	37	55.7	0	56	66	39.713	0	18	3.225	36.49	23	52.2	2.05333	5	119.8
Animal9	47.38	0	36	0	35	139.9	9	49	71	28.51	6.9	11	1.754	26.903	57	98.9	4.77333	9	54
Animal10	40.09	2.1	16	3.9	29	122.3	3	64	45	19.42	0	5	1.05	18.372	20	58	5.132	1	347.5
Animal11	44.5	4.6	16	0	24	132.8	7	60	40	24.849	4.3	25	3.127	21.883	18	82.9	1.30667	9	55.2
Animal12	19.62	12.8	26	0	35	60.3	0	57	61	21.295	0	2	0.109	21.19	24	67.4	1	5	113.4
Animal13	63.8	22.7	19	0	27	179.1	5	59	46	27.497	8.2	27	4.963	22.579	31	45.8	4.02667	2	302.6
Animal14	40.98	40.3	23	0	25	113.6	1	52	48	19.999	22.5	22	2.867	17.16	24	86.7	26.7867	2	214
Animal15	55.74	9	24	0	27	161.7	5	53	51	25.147	0	16	3.12	22.047	13	116.2	45.4067	5	165.7
Animal16	51.33	20.1	16	0	25	150.7	7	61	41	22.075	3	14	2.582	19.482	46	32	28.7867	9	117.7
Animal17	46.09	31.9	20	0	22	138	5	52	42	23.981	0	11	2.308	21.744	7	61.2	3.08	6	75.6
Animal18	15.24	23.3	10	0	23	50.5	0	70	33	21.919	6.8	18	4.021	17.873	14	51.1	2.84667	7	92.5
Animal19	45.81	21	21	0	33	137.8	2	61	54	21.664	6.4	12	3.034	18.63	17	109.8	6.92667	7	94.6
Animal20	35.81	9	29	0	30	108.3	8	51	59	26.309	5.4	16	3.021	23.318	29	75.5	1	6	159.3
Animal21	51.84	2	28	0	40	149.5	9	59	68	30.066	0	17	2.888	27.192	27	46.6	2.92667	8	76.3
Animal22	82.26	0	7	0	12	250	3	63	19	36.6	4.9	20	3.031	33.555	17	121.8	30.4733	12	63
Animal23	47.17	13.7	19	0	23	147.3	5	55	42	43.56	11.2	10	1.909	41.651	20	51.8	1.60667	1	203.4
Animal24	19.48	10	17	0	35	61.6	2	67	52	25.633	7.7	27	4.925	20.794	15	59.8	1.83333	6	108.2
Animal25	27.85	25.2	19	0	31	87.4	1	62	50	22.055	0	15	2.793	19.298	34	44.1	10.3133	4	172.3
Animal26	50.99	8.7	23	0	31	149.4	7	57	54	22.287	4.1	10	2.232	20.067	41	53	10.58	4	234.5
Animal27	19.14	7.3	11	0	23	58.1	0	68	34	27.364	29.6	8	2.062	25.302	23	70.1	14.48	4	150.3
Animal28	25.3	10.7	28	4.9	44	80.7	1	61	72	24.462	22.5	14	2.413	22.059	15	52.5	1	8	111.2
Animal29	22.21	23.4	14	0	23	70.5	2	62	37	19.034	4.5	9	0.369	18.759	9	76.2	1.02	5	105.7
Animal30	43.35	8.6	14	0	21	132.7	9	60	35	30.96	4.3	10	1.251	29.697	31	60.3	17.276	4	47.1
Animal31	50.37	6.5	28	0	25	149	6	47	53	22.339	6.7	12	2.484	19.885	38	67	4.02327	5	130.3
Animal32	20.8	6.4	10	0	30	64.3	0	75	40	32.643	8.4	20	3.779	28.904	26	57.2	1.8434	5	129.5
Animal33	33.44	9.2	26	0	45	96.5	1	63	71	24.218	2.3	23	4.214	19.952	25	115.2	1.452	6	80.4
Animal34	59.75	14.3	24	0	27	185	11	53	51	21.421	2.6	17	2.351	19.197	43	59.9	24.7373	1	191.5
Animal35	34.56	2.1	22	0	27	104.8	2	55	49	39.779	8.4	13	2.122	37.657	26	86.5	6.50667	0	0
Animal36	64.19	4.8	25	0	30	185.2	16	55	55	27.614	7.2	19	4.433	23.168	20	74.4	7.80667	6	151.9
Animal37	22.12	9.9	19	0	24	67.2	3	56	43	24.136	8.8	14	1.579	22.6	27	93.6	1	8	49.3
Animal38	51.34	2.5	11	0	17	154.8	9	61	28	29.444	8.8	21	4.334	25.127	31	85.8	1.06	6	179.4
Animal39	28.17	20.7	21	0	25	84.1	2	54	46	32.064	4.2	16	3.248	28.815	4	51.6	1	10	87.1
Animal40	43.26	10.5	16	0	17	129.9	9	52	33	31.802	2.7	28	5.877	25.935	21	68	1	0	0
Animal41	48.98	9.4	20	0	19	143.4	20	49	39	34.073	0	26	4.863	29.221	38	76.5	2.78	0	0
Animal42	22.69	21.1	23	0	24	70	0	51	47	27.147	7.4	12	2.182	24.944	24	48.1	2.24	7	151
Animal43	48.91	7.7	26	0	27	145.4	5	51	53	36.735	0	28	5.901	30.842	22	114.7	1	1	165
Animal44	37.87	0	22	0	24	112.9	7	52	46	28.179	2.5	23	4.081	24.09	37	47.7	4.82667	7	89.1
Animal45	33.25	8.4	24	0	41	105.1	1	63	65	28.699	7.3	22	4.032	24.705	19	38.4	10.02	7	78.8
Animal46	35.1	8	21	0	24	104.9	3	53	45	18.836	8.3	10	1.198	17.623	16	67.9	5.64	1	236.9
Animal47	30.84	18	12	0	19	96.2	5	61	31	22.823	3.6	16	3.319	19.531	14	61.2	2.16	NA	NA
Animal48	25.33	5.7	24	0	31	76	0	56	55	13.76	2.9	0	0	13.76	10	46.9	1	6	48.3
Animal49	31.86	16.1	19	0	24	98.2	6	56	43	33.002	3.7	24	5.412	27.658	33	55.3	2.54	5	139.4
Animal50	23.73	5.2	20	0	35	77.8	0	64	55	21.371	6.6	16	3.486	18.024	17	105.8	1.11333	4	152.5
Animal51	36.31	2.1	18	0	21	109.8	5	54	39	28.21	4.8	25	4.335	23.88	15	42.2	1.49333	6	129.4
Animal52	79.56	2.1	9	0	15	246.8	2	63	24	26.174	0	21	3.627	22.589	25	64.2	1	9	58.3
Animal53	46.79	6.5	18	0	26	138.5	6	59	44	23.459	5.8	9	1.01	22.487	12	66.4	2.03333	4	214.4
Animal54	29.2	3.2	20	0	30	93.1	3	60	50	24.507	3.7	13	2.591	21.925	13	65.4	1.58	9	120.9
Animal55	37.81	6.7	18	0	20	114.6	6	53	38	25.856	10.3	9	1.179	24.714	21	84.7	16.1667	4	255.3
Animal56	15.72	9.5	9	0	27	52.5	0	75	36	15.962	6.9	1	0.234	15.728	25	82	2.50453	NA	NA
Animal57	28.39	10.9	26	0	44	88.8	1	63	70	27.605	5.7	33	4.347	23.37	29	61.8	1	4	94.8
Animal58	19.12	11.1	50	0.7	18	44	16	26	68	26.844	0	5	0.627	26.271	30	61.9	1	0	0
Animal59	48.65	17.5	17	1.2	33	151.1	9	66	50	21.74	8.7	15	2.236	19.52	45	47.1	2.31333	9	23.3
Animal60	34.62	14.5	25	0	32	101	2	56	57	25.56	3.3	16	3.272	22.282	40	108.6	1.68	5	68.2
Animal61	24.72	3	15	0	31	74.9	0	67	46	20.684	6.1	19	2.623	18	31	47.9	1	6	159.6
Animal62	24.41	13.4	18	0	29	73.7	3	62	47	17.346	9.8	7	1.152	16.252	31	60	6.18	4	143.6
Animal63	48.72	17.8	19	0	21	145.1	11	53	40	18.031	8.6	9	1.965	16.107	14	81	33.4867	4	69.9
Animal64	24.68	7	9	0	17	80.1	2	65	26	20.777	9	2	0.781	19.998	30	85.2	1	5	97

## Sheet: c)
	EPM_Perc_time_open_arm	EPM_Time_immobile	EPM_Closed_arm_entries	EPM_Closed_arm_latency_to_first_entry	EPM_Open_arm_entries	EPM_Open_arm_time	EPM_Full_open_arm_entries	EPM_Perc_entries_open_arm	EPM_Total_entries	OF_Distance	OF_Time_immobile	OF_OF_inner_zone_entries	OF_OF_inner_zone_distance	OF_OF_outer_zone_distance	FST_floating_frequency	FST_floating_latency	SRT_Initial_CORT	TST_Immobility_frequency	TST_Immobility_latency
Animal1	13.7926	2.55863	18.546	-0.271329	12.4182	25.7893	-2.12769	-6.93053	30.9821	-5.27522	-5.7468	-11.8734	-2.33514	-2.9189	-1.3799	-3.01873	48.8186	-3.43936	160.948
Animal2	-18.1355	-6.81702	-0.534915	-0.271329	3.59529	-52.9364	-3.5888	2.99238	3.4868	-0.541	1.25948	-2.0876	-0.616121	0.104609	3.58155	-19.1931	-6.79359	7.72437	-61.847
Animal3	-24.27	-2.92397	-4.08962	-0.271329	2.52286	-69.4213	-4.22485	6.96154	-1.46652	-12.2014	-2.29368	-0.483915	-0.799392	-11.2938	-1.3799	-14.4301	-6.82628	0.125282	47.2531
Animal4	-9.82887	8.82157	8.61525	5.78164	6.41477	-30.7552	0.934295	-3.95366	14.9194	4.26069	-5.75899	11.4979	3.0949	1.22491	-15.272	-5.99561	-5.57719	-2.21356	84.8933
Animal5	-16.9097	1.50818	-3.2007	-0.271329	1.35697	-51.9945	-2.41371	3.98467	-2.13644	-8.34834	0.544248	-12.2274	-1.36112	-7.13217	-20.2334	22.3839	-1.51999	-0.978676	-45.1087
Animal6	25.2102	-4.4579	-12.0053	-0.271329	-14.5887	76.1929	-3.18489	1.0078	-27.1648	1.25505	-0.215745	-4.50773	-1.77223	2.89592	-14.2797	32.3068	2.55538	3.90761	-23.2697
Animal7	-7.98014	6.56758	7.28902	-0.271329	1.33272	-30.2833	-1.78199	-6.93053	8.17857	4.20612	-2.16917	9.03067	1.6788	2.55755	-0.387614	-13.537	5.85207	-3.3394	60.7662
Animal8	-19.8894	-4.86969	8.87405	0.423274	9.4586	-60.0955	-4.55211	-1.96908	18.3769	13.9822	-5.81594	2.43646	0.432999	13.4708	-0.387614	-17.01	-5.46139	-0.702001	-4.40137
Animal9	10.4602	-11.391	15.3757	-0.271329	7.387	28.9379	4.81785	-8.91511	22.5779	2.86553	1.36595	-4.26849	-0.995146	3.95767	35.3348	29.3299	-2.9416	3.70522	-72.9101
Animal10	2.89829	-9.47097	-4.53829	3.5986	1.52233	10.8133	-1.27043	5.96925	-2.87207	-6.15439	-5.96042	-10.2059	-1.66239	-4.50756	4.57384	-11.2547	-3.13805	-4.09793	219.879
Animal11	6.61189	-6.33499	-4.26871	-0.271329	-3.44928	19.6419	2.65598	2.00009	-7.6552	-0.767242	-1.47889	10.0942	0.407935	-1.02363	-13.2874	13.4533	-6.88102	4.07714	-73.8179
Animal12	-16.8782	0.359698	5.25377	-0.271329	7.36939	-49.7761	-3.64926	-0.976786	12.4705	-4.29384	-5.80162	-13.2788	-2.60955	-1.71128	8.543	-1.92721	-6.25592	-0.777027	-13.2049
Animal13	26.2682	11.3404	-2.16765	-0.271329	-0.485502	66.8741	0.611754	1.0078	-2.49251	1.86034	1.80569	11.7776	2.2287	-0.332991	5.56613	-23.3607	-3.33678	-3.0843	175.778
Animal14	2.49336	29.5391	2.22635	-0.271329	-2.45778	-0.455829	-3.486	-5.93824	-0.084111	-5.57985	16.5877	6.51288	0.0614579	-5.71021	1.59697	17.224	19.5308	-2.87936	84.5957
Animal15	18.0743	-2.30647	4.01117	-0.271329	-0.565269	48.8027	1.06356	-4.94595	3.14919	-0.47154	-5.42264	0.288328	0.340032	-0.86089	-14.2797	46.4966	38.0704	-0.484038	39.0064
Animal16	15.2808	8.30358	-4.31763	-0.271329	-2.51913	40.9996	2.97683	2.99238	-6.97999	-3.51986	-2.71367	-0.829996	-0.0969838	-3.40612	29.3811	-37.0543	21.9289	3.51644	-6.70086
Animal17	8.2694	20.4625	-0.900968	-0.271329	-5.54775	25.3639	0.526905	-5.93824	-6.64337	-1.62855	-5.7649	-4.59058	-0.476171	-1.16155	-11.3028	-8.07942	-4.92384	1.13804	-50.536
Animal18	-22.0598	12.049	-10.7874	-0.271329	-4.52306	-61.1478	-4.28251	11.923	-15.4277	-3.67465	1.10267	2.96122	1.29728	-5.00271	-9.31823	-18.1016	-4.65798	1.76751	-34.4677
Animal19	8.62876	9.67178	0.724159	-0.271329	5.49462	26.2182	-2.22335	2.99238	6.31645	-3.92769	0.734456	-3.00467	0.332651	-4.25155	-6.34136	40.1459	-0.655568	1.77401	-32.4329
Animal20	-0.655899	-3.71188	8.50439	-0.271329	2.35748	-1.9356	4.27142	-6.93053	10.464	0.681502	-0.118525	0.533885	0.25731	0.400312	8.543	6.11034	-6.21206	0.871872	33.2766
Animal21	16.2277	-9.50286	7.05427	-0.271329	12.3013	41.1232	5.04149	1.0078	19.0754	4.40954	-5.70962	2.04308	0.196403	4.24445	-1.3799	-22.5669	-4.76343	2.91092	-52.0126
Animal22	47.1369	-11.8739	-14.023	-0.271329	-15.5886	142.265	-1.3315	4.97696	-30.2265	10.8932	-0.652367	5.47198	0.434203	10.5584	-10.3105	52.0534	23.4867	7.38656	-66.7177
Animal23	10.0785	1.80055	-1.03616	-0.271329	-4.55692	35.8649	0.94452	-2.96137	-5.95027	17.7995	5.40584	-5.01754	-0.793515	18.592	-10.3105	-17.4069	-6.17798	-4.52982	75.7946
Animal24	-17.9327	-1.38137	-2.85843	-0.271329	7.54436	-50.5854	-2.37386	8.94612	4.91386	0.0107136	2.00617	11.6779	2.17675	-2.10423	1.59697	-9.46862	-5.75097	0.70475	-17.7515
Animal25	-9.24681	15.2149	-0.283272	-0.271329	3.5932	-24.3103	-3.14306	3.98467	3.5217	-3.5397	-5.81637	0.0452434	0.103285	-3.5887	8.543	-25.0476	2.7465	-1.63439	46.4963
Animal26	13.4395	-2.17315	2.69565	-0.271329	3.58974	37.0222	2.35744	-0.976786	6.64815	-3.30949	-1.53245	-5.23866	-0.463231	-2.82563	12.5122	-16.2162	3.31598	-1.51088	112.224
Animal27	-18.7564	-5.34831	-9.61131	-0.271329	-4.47852	-54.4869	-4.31979	9.93841	-14.1006	1.72837	23.815	-7.56251	-0.694589	2.36902	7.55071	0.75197	6.86441	-0.766344	21.8723
Animal28	-13.4762	0.117237	7.49346	4.59089	16.3745	-34.171	-3.21511	2.99238	23.8731	-1.15126	17.2936	-1.94593	-0.401823	-0.848982	-5.34907	-16.7123	-6.78919	2.6438	-15.6589
Animal29	-15.7079	12.3738	-6.15904	-0.271329	-4.52838	-42.6506	-2.31009	3.98467	-10.9287	-6.53741	-1.05211	-6.32922	-2.37257	-4.12354	-27.1795	6.80494	-7.19627	-0.485303	-20.031
Animal30	6.35182	-2.2897	-6.92355	-0.271329	-6.49346	21.7002	4.57786	2.00009	-13.4561	5.29665	-1.32706	-5.36531	-1.49263	6.73013	24.4197	-8.97248	10.0719	-1.50478	-76.456
Animal31	12.0225	-8.07151	7.17509	-0.271329	-2.53495	36.154	1.86252	-10.8997	4.49373	-3.25789	-0.0611181	-4.17456	-0.337387	-3.00622	11.5199	-2.32413	-4.0221	0.372435	-3.58649
Animal32	-16.5147	-5.70421	-10.8877	-0.271329	2.50727	-47.3297	-4.28933	16.8844	-8.20834	6.96667	2.72354	5.4859	1.13881	5.94325	-5.34907	-12.0486	-5.96547	0.347218	0.980814
Animal33	-4.39541	-1.90873	5.52903	-0.271329	17.4484	-16.5282	-3.50438	4.97696	23.2005	-1.39338	-3.28723	7.75004	1.484	-2.93974	3.58155	45.5043	-5.50437	1.21663	-43.0164
Animal34	22.5495	3.67727	3.48095	-0.271329	-0.532633	73.2914	6.51339	-4.94595	2.81501	-4.16881	-3.04203	1.75475	-0.372622	-3.68892	20.4505	-9.36939	17.6427	-4.32621	66.045
Animal35	-2.31007	-7.6803	1.7131	-0.271329	-0.451895	-6.23033	-2.17499	-2.96137	1.36963	14.0477	2.89019	-2.0122	-0.57178	14.6288	0.604677	17.0255	-0.843223	-5.07526	-126.296
Animal36	24.2577	-5.31729	5.64172	-0.271329	2.72407	67.6864	11.8273	-2.96137	9.00946	1.97644	1.66143	4.15551	1.79191	0.251468	1.59697	5.01882	0.443454	0.150265	28.6744
Animal37	-16.2129	-0.7604	-1.0174	-0.271329	-3.35511	-46.8132	-1.75237	-1.96908	-4.08001	-1.47475	3.37308	-1.61167	-1.22122	-0.312153	3.58155	24.0708	-6.00182	2.68108	-74.8747
Animal38	14.3825	-8.15493	-9.83689	-0.271329	-10.3769	43.4011	4.18908	2.99238	-20.0155	3.79233	3.14604	5.74858	1.59587	2.19537	9.53529	16.3309	-5.98865	0.773784	56.7961
Animal39	-9.04603	9.91402	0.85002	-0.271329	-2.43119	-27.8687	-2.50067	-3.95366	-1.49963	6.39213	-1.68594	0.567584	0.501004	5.85493	-22.218	-17.6054	-6.117	3.975	-34.0255
Animal40	7.63031	-1.37412	-4.4632	-0.271329	-10.4299	21.3969	4.55211	-5.93824	-14.9217	6.13215	-3.06659	12.5565	3.13188	2.99714	-6.34136	-1.33184	-5.9112	-5.13316	-123.514
Animal41	12.9492	-0.966819	-0.17282	-0.271329	-8.41319	33.7629	15.7541	-8.91511	-8.56749	8.38565	-5.70631	10.3375	2.06925	6.2578	21.4428	7.10263	-4.01862	-5.23037	-124.612
Animal42	-12.2938	10.5233	2.09863	-0.271329	-3.68646	-37.2622	-4.2939	-6.93053	-2.2091	1.51304	2.17761	-2.43441	-0.44683	2.01378	-3.36449	-21.0784	-4.23464	2.20802	28.5383
Animal43	13.2014	-3.00535	5.58864	-0.271329	-0.602596	36.3344	0.748494	-6.93053	4.60643	11.0271	-5.5846	12.1939	3.09231	7.86631	3.58155	45.0081	-5.82358	-4.27285	40.9462
Animal44	0.61988	-10.5238	1.57163	-0.271329	-3.41367	1.12251	2.6297	-5.93824	-1.66007	2.53709	-3.27614	8.0893	1.38558	1.16636	13.5045	-21.4753	-2.89778	2.0934	-37.4689
Animal45	-4.31461	-1.63415	3.05024	-0.271329	13.4935	-7.1468	-3.89768	4.97696	16.9228	3.05308	1.91815	6.75547	1.29497	1.77662	-15.272	-30.7036	3.30989	1.95086	-44.2745
Animal46	-1.71611	-2.70356	0.291074	-0.271329	-3.5837	-6.01622	-1.41506	-4.94595	-3.62381	-6.73389	2.81885	-5.47984	-1.55985	-5.25078	-2.37219	-1.43107	-1.52707	-4.40427	114.1
Animal47	-5.56679	8.12379	-8.30223	-0.271329	-8.39225	-14.1074	0.634381	2.99238	-16.5484	-2.77762	-1.97633	1.27605	0.662026	-3.35749	-14.2797	-8.07942	-4.8019	NA	NA
Animal48	-10.4684	-5.30809	3.54098	-0.271329	3.50322	-32.7246	-4.53366	-1.96908	7.13139	-11.7708	-2.80118	-15.3892	-2.77253	-9.084	-20.2334	-22.2692	-6.159	1.08968	-75.5981
Animal49	-6.88567	6.0515	-0.809798	-0.271329	-3.35629	-16.7264	1.32511	-1.96908	-3.86385	7.3229	-1.84558	8.35045	2.64382	4.70685	7.55071	-13.9339	-4.65058	-0.470999	16.8365
Animal50	-13.5249	-5.77318	-0.830809	-0.271329	7.46285	-34.0729	-4.28694	5.96925	6.75087	-4.21843	1.06361	0.502622	0.716033	-4.85287	-0.387614	36.1767	-5.91629	-1.16705	29.2263
Animal51	0.200784	-8.65347	-2.48359	-0.271329	-6.57303	0.12453	0.888955	-3.95366	-9.46967	2.56785	-1.03232	9.22206	1.53401	0.957979	-18.2488	-26.9329	-5.37421	0.99669	4.14258
Animal52	43.6611	-9.8125	-11.5158	-0.271329	-12.54	137.644	-2.20892	4.97696	-24.4729	0.547543	-5.74568	5.31023	0.802754	-0.323068	8.543	-5.10254	-6.50466	3.72779	-65.7396
Animal53	6.33002	-3.60955	-1.48527	-0.271329	-1.27531	20.1185	1.82709	1.0078	-2.17266	-2.14653	0.182577	-6.55367	-1.73736	-0.424282	-12.2951	-2.91951	-6.47719	-2.36076	92.8265
Animal54	-8.11246	-6.96361	-0.643756	-0.271329	2.48586	-18.73	-1.57599	2.00009	1.86209	-1.10661	-1.92075	-2.48424	-0.182181	-0.981949	-23.2103	-3.9118	-5.67764	4.1451	-4.77582
Animal55	2.62791	-3.69343	-2.5438	-0.271329	-7.39508	7.02948	1.46259	-4.94595	-9.75834	0.231994	4.95391	-6.41938	-1.56815	1.78555	10.5276	15.2394	9.56494	-0.587333	132.312
Animal56	-20.4538	-1.55215	-11.6717	-0.271329	-0.560502	-57.2434	-4.43116	16.8844	-12.4052	-9.58573	1.51684	-14.3291	-2.49455	-7.13117	0.604677	12.5602	-4.53706	NA	NA
Animal57	-8.44088	-0.298262	5.04138	-0.271329	16.3794	-21.9057	-3.32851	4.97696	21.52	1.96751	-0.0606756	17.8559	1.61653	0.451911	0.604677	-7.48404	-5.98915	-0.844499	-30.0918
Animal58	-18.3265	0.559314	30.0865	0.423274	-9.40388	-68.12	11.5172	-31.7378	20.6419	1.21238	-5.82066	-10.2791	-2.11886	3.33055	3.58155	-7.38481	-5.97706	-5.14954	-124.959
Animal59	11.4233	6.29854	-3.05088	0.919419	5.57386	39.2566	4.73261	7.95383	2.80512	-3.85227	3.13939	-0.38976	-0.528618	-3.36841	18.4659	-22.0707	-4.59808	3.76331	-100.061
Animal60	-2.02155	3.96215	4.10202	-0.271329	4.32309	-9.86407	-2.0038	-1.96908	8.03543	-0.0617236	-2.05081	0.927513	0.593901	-0.627701	15.489	38.9552	-5.38593	-0.328749	-55.8539
Animal61	-13.2196	-7.79489	-5.61399	-0.271329	3.558	-38.0727	-4.79718	8.94612	-1.7743	-4.90013	0.889023	3.74503	-0.119459	-4.87669	4.57384	-21.2769	-6.38019	1.03402	37.3419
Animal62	-14.549	1.74532	-1.87668	-0.271329	1.61217	-41.4786	-1.59508	3.98467	0.0232971	-8.2124	3.90439	-8.5793	-1.6344	-6.61121	6.55842	-9.27017	-1.56622	-1.02218	17.2867
Animal63	11.9348	6.36896	-1.01603	-0.271329	-6.46442	33.9676	6.96856	-4.94595	-7.59714	-7.53268	2.84466	-6.0007	-0.733045	-6.7551	-13.2874	11.5679	26.4545	-1.19528	-56.0158
Animal64	-12.1687	-3.28043	-11.5221	-0.271329	-10.4214	-31.0023	-2.5616	6.96154	-21.9199	-4.80785	3.51941	-13.2721	-1.94761	-2.89409	1.59697	15.7356	-6.11373	0.10527	-27.3087
