# Supplementary material for: Connecting Anxiety and Genomic Copy Number Variation: A Genome-Wide Analysis in CD-1 Mice
Source: PLoS One. 2015 May 26;10(5):e0128465. doi: 10.1371/journal.pone.0128465 (PMC4444327; doi:10.1371/journal.pone.0128465)
Supplement: S5 Table — For each test parameter of all performed behavioral tests (EPM, FST, OF, TST, SRT), the nominal p-values and p-values corrected for multiple testing using Holm’s correction method are shown. Further columns show information on CNVs’ chromosomal positions and the number of probes on the array (JaxMDGA) targeting the respective CNV. (XLS) [file pone.0128465.s011.xls]

## Sheet: Supplemenary Table S5
CNV information						EPM - Percent time on open arm		EPM - Time immobile		EPM - Entries closed arm		EPM - Latency to first entry of closed arm		EPM - Entries open arm		EPM - Time on open arm		EPM - Entries full open arm		EPM - Percent entries open arm		EPM - Total entries		FST - Swimming frequency		FST - Floating latency		OF - Total distance travelled		OF - Time immobile		OF - Entries inner zone		OF - Distance travelled inner zone		OF - Distance travelled outer zone		TST - Immobility frequency		TST - Immobility latency		SRT - Initial corticosterone concentration
CNV no.	Chr	Start	End	Size	No. of Probes in CNV	pVal	pVal_Holm	pVal	pVal_Holm	pVal	pVal_Holm	pVal	pVal_Holm	pVal	pVal_Holm	pVal	pVal_Holm	pVal	pVal_Holm	pVal	pVal_Holm	pVal	pVal_Holm	pVal	pVal_Holm	pVal	pVal_Holm	pVal	pVal_Holm	pVal	pVal_Holm	pVal	pVal_Holm	pVal	pVal_Holm	pVal	pVal_Holm	pVal	pVal_Holm	pVal	pVal_Holm	pVal	pVal_Holm
1	1	16147549	16166507	18958	8	0.382683	1	0.236543	1	0.71776	1	0.881107	1	0.837439	1	0.401575	1	0.24884	1	0.484948	1	0.915323	1	0.225903	1	0.874572	1	0.396712	1	0.774396	1	0.753713	1	0.679101	1	0.283943	1	0.644928	1	0.23648	1	0.618155	1
2	1	20549514	20552454	2940	4	0.995024	1	0.919167	1	0.837427	1	0.0678203	1	0.5502	1	0.995596	1	0.455675	1	0.773275	1	0.649199	1	0.933021	1	0.427943	1	0.921357	1	0.96107	1	0.946352	1	0.975824	1	0.918551	1	0.342198	1	0.117647	1	0.50524	1
3	1	23385680	23385855	175	3	0.498263	1	0.570391	1	0.42995	1	0.582686	1	0.996077	1	0.557214	1	0.534473	1	0.341183	1	0.638089	1	0.101035	1	0.409944	1	0.770176	1	0.745351	1	0.393644	1	0.401178	1	0.580489	1	0.751185	1	0.684885	1	0.797685	1
4	1	31776449	31799110	22661	4	0.129831	1	0.365626	1	0.641041	1	0.397636	1	0.943528	1	0.134343	1	0.127819	1	0.796752	1	0.753517	1	0.99338	1	0.602657	1	0.487833	1	0.608575	1	0.496998	1	0.729223	1	0.491867	1	0.962777	1	0.582838	1	0.110075	1
5	1	35232073	35235862	3789	4	0.440498	1	0.534735	1	0.812478	1	0.297316	1	0.498751	1	0.420352	1	0.68955	1	0.364557	1	0.800457	1	0.153846	1	0.470561	1	0.135178	1	0.0915773	1	0.675113	1	0.967957	1	0.0989661	1	0.98578	1	0.0746804	1	0.140208	1
6	1	36837694	36838290	596	10	0.821186	1	0.818297	1	0.578703	1	0.469396	1	0.256815	1	0.803779	1	0.758712	1	0.821952	1	0.336471	1	0.577965	1	0.457443	1	0.239662	1	0.097503	1	0.879093	1	0.351284	1	0.1161	1	0.552256	1	0.325147	1	0.436254	1
7	1	39032035	39038959	6924	11	0.744413	1	0.575	1	0.609943	1	0.501394	1	0.669775	1	0.720893	1	0.45562	1	0.930725	1	0.586636	1	0.824273	1	0.815962	1	0.361609	1	0.927055	1	0.607127	1	0.610339	1	0.246828	1	0.435433	1	0.934508	1	0.695689	1
8	1	42233858	42246588	12730	4	0.363074	1	0.958391	1	0.696404	1	0.872899	1	0.856153	1	0.291815	1	0.749532	1	0.945652	1	0.74365	1	0.917795	1	0.247585	1	0.407956	1	0.034735	1	0.141096	1	0.102804	1	0.647507	1	0.67103	1	0.992761	1	0.414323	1
9	1	52348330	52357761	9431	3	0.0238254	1	0.177765	1	0.0381853	1	0.804734	1	0.451546	1	0.0274456	1	0.106275	1	0.0197289	1	0.0995018	1	0.559282	1	0.693437	1	0.0940645	1	0.525221	1	0.187387	1	0.304567	1	0.117155	1	0.17476	1	0.82105	1	0.885878	1
10	1	55456409	55456847	438	4	0.602114	1	0.710169	1	0.0643627	1	0.925142	1	0.195872	1	0.647122	1	0.980976	1	0.247019	1	0.0669956	1	0.296664	1	0.133483	1	0.263487	1	0.276244	1	0.930046	1	0.839666	1	0.19588	1	0.845557	1	0.7487	1	0.395481	1
11	1	55818726	55848831	30105	9	0.960083	1	0.768084	1	0.0065011	1	0.55073	1	0.158404	1	0.811092	1	0.653919	1	0.0281686	1	0.0157464	1	0.270634	1	0.953024	1	0.443243	1	0.520152	1	0.888866	1	0.987115	1	0.397346	1	0.700498	1	0.952906	1	0.854787	1
12	1	59336832	59337495	663	4	0.484201	1	0.804245	1	0.68374	1	0.84509	1	0.404086	1	0.486615	1	0.515346	1	0.986665	1	0.485101	1	0.310104	1	0.113397	1	0.843249	1	0.0761914	1	0.231906	1	0.352843	1	0.989639	1	0.150649	1	0.43697	1	0.588504	1
13	1	71734705	71741575	6870	8	0.099774	1	0.741817	1	0.484326	1	0.946508	1	0.833092	1	0.0858021	1	0.270389	1	0.666947	1	0.600474	1	0.0719204	1	0.0237819	1	0.659573	1	0.836368	1	0.16505	1	0.22785	1	0.415582	1	0.443519	1	0.564437	1	0.765682	1
14	1	72198891	72210724	11833	11	0.00542056	1	0.935265	1	0.814472	1	0.924222	1	0.436527	1	0.00476267	1	0.0498014	1	0.591029	1	0.561759	1	0.0226502	1	0.269109	1	0.835418	1	0.695358	1	0.35305	1	0.602068	1	0.708803	1	0.415628	1	0.441186	1	0.477465	1
15	1	77743451	77769548	26097	15	0.747153	1	0.289891	1	0.234855	1	0.559036	1	0.672438	1	0.709545	1	0.354903	1	0.266705	1	0.346597	1	0.25205	1	0.025523	1	0.45564	1	0.328931	1	0.368016	1	0.508065	1	0.517648	1	0.580284	1	0.640961	1	0.216444	1
16	1	78229021	78245671	16650	10	0.962994	1	0.836916	1	0.0166822	1	0.793228	1	0.110185	1	0.955969	1	0.531715	1	0.304482	1	0.0211544	1	0.485773	1	0.879911	1	0.803734	1	0.520651	1	0.434332	1	0.670632	1	0.872457	1	0.600687	1	0.735685	1	0.703271	1
17	1	79034685	79074361	39676	13	0.48634	1	0.555104	1	0.160959	1	0.544006	1	0.434521	1	0.46689	1	0.710468	1	0.178169	1	0.21316	1	0.621328	1	0.0618343	1	0.985611	1	0.181467	1	0.70763	1	0.616424	1	0.874955	1	0.0089721	1	0.586764	1	0.366596	1
18	1	95748149	95795140	46991	8	0.741271	1	0.50135	1	0.248352	1	0.38784	1	0.204972	1	0.642859	1	0.0582063	1	0.025948	1	0.954894	1	0.601038	1	0.768335	1	0.10411	1	0.982018	1	0.729289	1	0.687586	1	0.0534093	1	0.120022	1	0.483809	1	0.945232	1
19	1	97254323	97293244	38921	6	0.11135	1	0.48928	1	0.0293033	1	0.385692	1	0.0403554	1	0.158027	1	0.582771	1	0.178893	1	0.0145501	1	0.833357	1	0.780189	1	0.998487	1	0.917933	1	0.137054	1	0.0771976	1	0.61921	1	0.285566	1	0.364983	1	0.652709	1
20	1	97405881	97405894	13	2	0.774168	1	0.9946	1	0.0865977	1	0.617508	1	0.111022	1	0.623244	1	0.0315953	1	0.0144778	1	0.894579	1	0.557807	1	0.824811	1	0.829427	1	0.930919	1	0.557723	1	0.412542	1	0.635078	1	0.384281	1	0.109695	1	0.758595	1
21	1	111646054	111711660	65606	7	0.55323	1	0.073574	1	0.109187	1	0.98933	1	0.0566695	1	0.613292	1	0.00871469	1	0.520046	1	0.0467383	1	0.630989	1	0.450706	1	0.506405	1	0.950096	1	0.485432	1	0.441617	1	0.605076	1	0.529531	1	0.351008	1	0.316334	1
22	1	116260504	116348067	87563	21	0.282252	1	0.533197	1	0.353964	1	0.395238	1	0.57965	1	0.227119	1	0.80691	1	0.596918	1	0.377881	1	0.773632	1	0.51176	1	0.321876	1	0.844644	1	0.0560609	1	0.0333893	1	0.60614	1	0.857947	1	0.587339	1	0.813024	1
23	1	117256807	117267404	10597	4	0.291325	1	0.753314	1	0.333616	1	0.380477	1	0.726545	1	0.226441	1	0.806063	1	0.433082	1	0.4311	1	0.644697	1	0.337144	1	0.294396	1	0.893232	1	0.0730411	1	0.0410682	1	0.547479	1	0.994212	1	0.335528	1	0.531985	1
24	1	118847466	118897095	49629	12	0.267848	1	0.734505	1	0.889383	1	0.362015	1	0.764108	1	0.249381	1	0.643138	1	0.783645	1	0.82372	1	0.308851	1	0.00397964	1	0.866501	1	0.448039	1	0.844809	1	0.517272	1	0.710665	1	0.538228	1	0.377993	1	0.178024	1
25	1	124786026	124822324	36298	17	0.383156	1	0.586336	1	0.21394	1	0.683287	1	0.861949	1	0.296812	1	0.640503	1	0.107149	1	0.422468	1	0.124677	1	0.697767	1	0.863396	1	0.908224	1	0.573761	1	0.707752	1	0.768335	1	0.220207	1	0.595868	1	0.517617	1
26	1	125564862	125583245	18383	5	0.546499	1	0.407872	1	0.0908157	1	0.725753	1	0.426233	1	0.454341	1	0.832636	1	0.144569	1	0.155003	1	0.10269	1	0.851428	1	0.82388	1	0.650792	1	0.674601	1	0.697813	1	0.725464	1	0.285623	1	0.699407	1	0.693912	1
27	1	129051041	129076535	25494	4	0.789141	1	0.796057	1	0.52447	1	0.915281	1	0.381561	1	0.893197	1	0.596584	1	0.983932	1	0.365962	1	0.145116	1	0.384358	1	0.0305285	1	0.364061	1	0.653118	1	0.556745	1	0.025374	1	0.352784	1	0.443281	1	0.153412	1
28	1	130723207	130733460	10253	10	0.631123	1	0.728262	1	0.456653	1	0.381734	1	0.0937462	1	0.741324	1	0.028287	1	0.368959	1	0.172965	1	0.0317243	1	0.411813	1	0.593385	1	0.300701	1	0.645168	1	0.99904	1	0.545614	1	0.633704	1	0.624462	1	0.87215	1
29	1	132430355	132474622	44267	14	0.0930138	1	0.536666	1	0.904899	1	0.579321	1	0.54957	1	0.134954	1	0.399583	1	0.811144	1	0.675582	1	0.0404933	1	0.614174	1	0.341501	1	0.737042	1	0.995695	1	0.897733	1	0.300834	1	0.111918	1	0.470448	1	0.292834	1
30	1	135250842	135255585	4743	16	0.0746349	1	0.384344	1	0.911015	1	0.565105	1	0.462413	1	0.0811386	1	0.761401	1	0.379793	1	0.618399	1	0.888836	1	0.184438	1	0.987163	1	0.413445	1	0.043789	1	0.0264907	1	0.556211	1	0.827635	1	0.768606	1	0.362546	1
31	1	141633508	141686866	53358	21	0.65992	1	0.757234	1	0.168517	1	0.397122	1	0.779287	1	0.671701	1	0.702478	1	0.154811	1	0.340207	1	0.935655	1	0.429928	1	0.480706	1	0.281892	1	0.717567	1	0.458188	1	0.331492	1	0.698189	1	0.892814	1	0.876771	1
32	1	142515175	142625802	110627	19	0.861241	1	0.275018	1	0.312141	1	0.328458	1	0.839678	1	0.829179	1	0.682658	1	0.20237	1	0.489559	1	0.488693	1	0.953723	1	0.579827	1	0.339936	1	0.876798	1	0.645204	1	0.468389	1	0.796632	1	0.660904	1	0.422617	1
33	1	145624593	145649348	24755	33	0.412855	1	0.00933862	1	0.351038	1	0.223435	1	0.134808	1	0.433926	1	0.744864	1	0.745454	1	0.169305	1	0.486141	1	0.819136	1	0.162999	1	0.5339	1	0.0717099	1	0.187534	1	0.0561104	1	0.816037	1	0.75521	1	0.790936	1
34	1	150529441	150543605	14164	3	0.574103	1	0.768168	1	0.577731	1	0.505477	1	0.197327	1	0.618586	1	0.5636	1	0.590508	1	0.293641	1	0.98774	1	0.67302	1	0.1963	1	0.383378	1	0.81668	1	0.782315	1	0.174496	1	0.315544	1	0.87129	1	0.717563	1
35	1	150754214	150777417	23203	9	0.673517	1	0.591576	1	0.707017	1	0.375992	1	0.157092	1	0.693301	1	0.538868	1	0.36316	1	0.30685	1	0.928514	1	0.731315	1	0.144267	1	0.518112	1	0.904017	1	0.785143	1	0.121759	1	0.208319	1	0.973177	1	0.922271	1
36	1	150869357	151048926	179569	45	0.896381	1	0.797602	1	0.718517	1	0.824142	1	0.266114	1	0.92273	1	0.699427	1	0.400434	1	0.397368	1	0.540435	1	0.591793	1	0.0678278	1	0.57767	1	0.814146	1	0.794548	1	0.0497449	1	0.166965	1	0.797556	1	0.892456	1
37	1	151114382	151189461	75079	19	0.579212	1	0.949024	1	0.433998	1	0.762255	1	0.718358	1	0.660519	1	0.478036	1	0.66201	1	0.503656	1	0.834143	1	0.356938	1	0.470267	1	0.423375	1	0.875313	1	0.792581	1	0.467015	1	0.260856	1	0.623253	1	0.912645	1
38	1	151948823	151949622	799	8	0.664181	1	0.79055	1	0.462908	1	0.998135	1	0.663982	1	0.7783	1	0.557996	1	0.758662	1	0.4918	1	0.68907	1	0.295043	1	0.438994	1	0.458907	1	0.879825	1	0.683501	1	0.454585	1	0.476017	1	0.562533	1	0.7778	1
39	1	152327228	152327348	120	2	0.789051	1	0.585329	1	0.486267	1	0.508503	1	0.56384	1	0.868762	1	0.372374	1	0.848921	1	0.460966	1	0.897387	1	0.149392	1	0.0665815	1	0.324105	1	0.158925	1	0.194595	1	0.0927336	1	0.0817039	1	0.971099	1	0.441322	1
40	1	152551280	152551619	339	6	0.855264	1	0.808231	1	0.929463	1	0.681078	1	0.487186	1	0.900419	1	0.2525	1	0.484134	1	0.653806	1	0.958255	1	0.28266	1	0.184272	1	0.494673	1	0.484396	1	0.61641	1	0.180125	1	0.205737	1	0.944886	1	0.904524	1
41	1	155362668	155395168	32500	26	0.312986	1	0.938389	1	0.960513	1	0.690389	1	0.0830455	1	0.40169	1	0.214733	1	0.0610689	1	0.340209	1	0.454565	1	0.549769	1	0.216313	1	0.72814	1	0.465063	1	0.561226	1	0.229599	1	0.0216686	1	0.51397	1	0.464608	1
42	1	159719419	160644184	924765	434	0.458056	1	0.841599	1	0.882462	1	0.932391	1	0.275416	1	0.525042	1	0.165336	1	0.188696	1	0.591882	1	0.675111	1	0.857669	1	0.5184	1	0.63361	1	0.559892	1	0.263261	1	0.689303	1	0.141987	1	0.0598469	1	0.680155	1
43	1	160802986	161749651	946665	290	0.619644	1	0.857476	1	0.377567	1	0.730724	1	0.983784	1	0.719653	1	0.393129	1	0.195179	1	0.623092	1	0.844131	1	0.542818	1	0.442523	1	0.983786	1	0.576396	1	0.396331	1	0.542394	1	0.108694	1	0.100865	1	0.878609	1
44	1	170514272	170514364	92	3	0.57359	1	0.438836	1	0.402254	1	0.934588	1	0.194901	1	0.521234	1	0.160177	1	0.959692	1	0.214863	1	0.468426	1	0.56138	1	0.898281	1	0.467935	1	0.263569	1	0.306311	1	0.897985	1	0.928197	1	0.671513	1	0.619476	1
45	1	173168430	173168911	481	10	0.560643	1	0.385376	1	0.904103	1	0.979604	1	0.963017	1	0.479273	1	0.561414	1	0.720641	1	0.971495	1	0.207934	1	0.16567	1	0.567684	1	0.586144	1	0.724274	1	0.965608	1	0.527156	1	0.563655	1	0.795622	1	0.77956	1
46	1	173219128	173222721	3593	17	0.456315	1	0.223952	1	0.68036	1	0.151819	1	0.403371	1	0.426002	1	0.332515	1	0.606388	1	0.471643	1	0.0544527	1	0.34936	1	0.533842	1	0.183984	1	0.0126352	1	0.01514	1	0.970705	1	0.768172	1	0.682346	1	0.602921	1
47	1	175732220	175912848	180628	66	0.417181	1	0.272011	1	0.821881	1	0.732655	1	0.963107	1	0.466834	1	0.151382	1	0.543325	1	0.876735	1	0.229234	1	0.36082	1	0.273924	1	0.265021	1	0.988018	1	0.571834	1	0.287838	1	0.832609	1	0.862736	1	0.851485	1
48	1	175929891	175942012	12121	4	0.764225	1	0.805428	1	0.223388	1	0.951345	1	0.358106	1	0.692154	1	0.791601	1	0.0742009	1	0.852189	1	0.183422	1	0.303191	1	0.0494098	1	0.556472	1	0.645763	1	0.270189	1	0.0613933	1	0.227819	1	0.366361	1	0.688591	1
49	1	175956768	175956788	20	3	0.943794	1	0.876391	1	0.137841	1	0.517379	1	0.468743	1	0.978903	1	0.69075	1	0.0606837	1	0.650386	1	0.238006	1	0.272895	1	0.0404926	1	0.897133	1	0.480158	1	0.169495	1	0.060032	1	0.368328	1	0.26123	1	0.995089	1
50	1	177725275	177729816	4541	7	0.556924	1	0.548695	1	0.920863	1	0.616211	1	0.598729	1	0.596593	1	0.675751	1	0.496749	1	0.801654	1	0.794332	1	0.289082	1	0.517595	1	0.669492	1	0.197991	1	0.170674	1	0.73951	1	0.85241	1	0.865629	1	0.994446	1
51	1	177998116	178000769	2653	5	0.508197	1	0.527375	1	0.301041	1	0.633125	1	0.425027	1	0.641948	1	0.56046	1	0.790476	1	0.297007	1	0.520384	1	0.341419	1	0.575615	1	0.740849	1	0.0504385	1	0.0435774	1	0.942477	1	0.955472	1	0.581919	1	0.0140348	1
52	1	183060113	183072518	12405	24	0.0384841	1	0.286499	1	0.832707	1	0.609436	1	0.879214	1	0.0440973	1	0.319743	1	0.824385	1	0.840823	1	0.184414	1	0.873415	1	0.880611	1	0.179982	1	0.404027	1	0.330251	1	0.935551	1	0.654616	1	0.128375	1	0.706878	1
53	1	186078558	186110754	32196	11	0.646213	1	0.562203	1	0.295862	1	0.896697	1	0.0212591	1	0.594214	1	0.200247	1	0.656649	1	0.0539521	1	0.149202	1	0.751636	1	0.809253	1	0.436868	1	0.499258	1	0.852674	1	0.752623	1	0.270887	1	0.765861	1	0.452008	1
54	1	191042126	191079146	37020	18	0.385816	1	0.166103	1	0.52875	1	0.849122	1	0.240499	1	0.327536	1	0.618909	1	0.871947	1	0.294172	1	0.253509	1	0.939056	1	0.0576063	1	0.434879	1	0.0860056	1	0.186241	1	0.0840224	1	0.479507	1	0.808087	1	0.911742	1
55	2	8079421	8097887	18466	3	0.721971	1	0.394913	1	0.0378608	1	0.994466	1	0.16726	1	0.694889	1	0.953902	1	0.36526	1	0.0470698	1	0.692388	1	0.908357	1	0.994794	1	0.452218	1	0.0853188	1	0.153768	1	0.687366	1	0.283255	1	0.928212	1	0.469461	1
56	2	10026781	10026809	28	3	0.270388	1	0.0685111	1	0.560587	1	0.976619	1	0.148241	1	0.237995	1	0.488194	1	0.690338	1	0.244136	1	0.167607	1	0.885934	1	0.552064	1	0.177674	1	0.631289	1	0.925381	1	0.496183	1	0.212221	1	0.963661	1	0.655941	1
57	2	13664146	13664834	688	3	0.530695	1	0.149316	1	0.397641	1	0.0417072	1	0.923418	1	0.375895	1	0.791442	1	0.610514	1	0.568318	1	0.709628	1	0.967871	1	0.194927	1	0.415658	1	0.0786683	1	0.0314431	1	0.400523	1	0.665741	1	0.672185	1	0.420217	1
58	2	14998525	15246657	248132	47	0.768414	1	0.0911271	1	0.478533	1	0.663481	1	0.652602	1	0.63507	1	0.679149	1	0.963968	1	0.486733	1	0.723549	1	0.94523	1	0.475307	1	0.503236	1	0.0180753	1	0.00658822	1	0.949523	1	0.745528	1	0.416777	1	0.817459	1
59	2	15367870	15368633	763	3	0.535632	1	0.266116	1	0.459236	1	0.381983	1	0.677019	1	0.419018	1	0.805399	1	0.950132	1	0.481258	1	0.533745	1	0.780912	1	0.239556	1	0.417627	1	0.0543177	1	0.0381663	1	0.468446	1	0.938614	1	0.297308	1	0.529668	1
60	2	19097545	19120990	23445	8	0.937766	1	0.274199	1	0.901469	1	0.142505	1	0.618132	1	0.812654	1	0.845957	1	0.991007	1	0.840952	1	0.70594	1	0.15864	1	0.172642	1	0.670757	1	0.0430882	1	0.0127829	1	0.404583	1	0.873241	1	0.850416	1	0.600552	1
61	2	23575240	23694548	119308	14	0.649517	1	0.744253	1	0.494298	1	0.279159	1	0.0208249	1	0.761657	1	0.982088	1	0.371983	1	0.0923441	1	0.447162	1	0.147991	1	0.822246	1	0.316903	1	0.225204	1	0.361862	1	0.615795	1	0.766568	1	0.890089	1	0.438751	1
62	2	24048126	24054617	6491	5	0.903282	1	0.591036	1	0.424046	1	0.222156	1	0.0687119	1	0.992207	1	0.241112	1	0.781586	1	0.138894	1	0.0990593	1	0.520097	1	0.415277	1	0.369424	1	0.134231	1	0.150401	1	0.612272	1	0.68565	1	0.73498	1	0.275781	1
63	2	24535423	24654597	119174	107	0.643935	1	0.199556	1	0.741083	1	0.752275	1	0.34841	1	0.700708	1	0.195124	1	0.174451	1	0.728347	1	0.116625	1	0.505496	1	0.468975	1	0.142259	1	0.424962	1	0.438334	1	0.314035	1	0.952409	1	0.435765	1	0.280454	1
64	2	38974768	38976716	1948	5	0.325729	1	0.251952	1	0.383811	1	0.0230588	1	0.135617	1	0.325535	1	0.816539	1	0.834869	1	0.173312	1	0.0306614	1	0.995712	1	0.60786	1	0.364596	1	0.905736	1	0.998856	1	0.575787	1	0.496124	1	0.404539	1	0.272016	1
65	2	46736100	46736483	383	3	0.0428078	1	0.975965	1	0.330689	1	0.384614	1	0.380426	1	0.0455002	1	0.362894	1	0.585189	1	0.286017	1	0.153157	1	0.321602	1	0.636362	1	0.466237	1	0.87831	1	0.709415	1	0.677009	1	0.601305	1	0.20793	1	0.877023	1
66	2	49051169	49070497	19328	7	0.6999	1	0.407688	1	0.424146	1	0.707959	1	0.418646	1	0.746648	1	0.175366	1	0.272687	1	0.983522	1	0.0334074	1	0.527116	1	0.64795	1	0.586116	1	0.269427	1	0.233307	1	0.851979	1	0.755921	1	0.23611	1	0.899158	1
67	2	51610260	51614420	4160	4	0.317243	1	0.278773	1	0.448418	1	0.289149	1	0.263806	1	0.308919	1	0.0439132	1	0.944874	1	0.284746	1	0.462897	1	0.396871	1	0.778477	1	0.496763	1	0.989179	1	0.835819	1	0.794289	1	0.595013	1	0.518476	1	0.920648	1
68	2	55558622	55579024	20402	6	0.770467	1	0.691475	1	0.60531	1	0.0955214	1	0.633645	1	0.719572	1	0.298653	1	0.929907	1	0.572073	1	0.332059	1	0.452887	1	0.0589984	1	0.499375	1	0.804108	1	0.600419	1	0.0518105	1	0.497434	1	0.94943	1	0.298974	1
69	2	62524035	62524468	433	6	0.682867	1	0.156712	1	0.805437	1	0.0334326	1	0.535693	1	0.656008	1	0.842415	1	0.761229	1	0.60955	1	0.977939	1	0.46179	1	0.695326	1	0.886032	1	0.806435	1	0.881212	1	0.632	1	0.00856023	1	0.205395	1	0.0986279	1
70	2	63192560	63242247	49687	4	0.688483	1	0.213364	1	0.857256	1	0.528326	1	0.897964	1	0.63545	1	0.849379	1	0.828656	1	0.827927	1	0.847861	1	0.618872	1	0.211555	1	0.451795	1	0.146534	1	0.347205	1	0.263503	1	0.428851	1	0.0291322	1	0.392369	1
71	2	65188132	65192936	4804	7	0.216646	1	0.743686	1	0.658841	1	0.448296	1	0.203677	1	0.203999	1	0.539295	1	0.69852	1	0.321437	1	0.861552	1	0.878038	1	0.812095	1	0.45031	1	0.892687	1	0.682098	1	0.87595	1	0.325323	1	0.136498	1	0.130659	1
72	2	67407575	67425236	17661	4	0.0987904	1	0.241161	1	0.936325	1	0.20628	1	0.37147	1	0.124741	1	0.656351	1	0.454137	1	0.578171	1	0.389767	1	0.325967	1	0.231707	1	0.585592	1	0.139074	1	0.200771	1	0.320152	1	0.664212	1	0.0768636	1	0.0312282	1
73	2	71656510	71687549	31039	67	0.422289	1	0.851163	1	0.509094	1	0.0294303	1	0.575624	1	0.420238	1	0.983665	1	0.292964	1	0.939085	1	0.515672	1	0.691509	1	0.67866	1	0.0661971	1	0.435782	1	0.53061	1	0.519995	1	0.601221	1	0.964457	1	0.711162	1
74	2	74336997	74349334	12337	4	0.614691	1	0.952153	1	0.653764	1	0.708304	1	0.344996	1	0.609622	1	0.416313	1	0.824125	1	0.420414	1	0.917616	1	0.356942	1	0.40754	1	0.976599	1	0.281779	1	0.23572	1	0.208931	1	0.19202	1	0.40992	1	0.307552	1
75	2	77654621	77675641	21020	7	0.341779	1	0.390441	1	0.365932	1	0.288451	1	0.943293	1	0.28215	1	0.747913	1	0.584465	1	0.616128	1	0.566608	1	0.58862	1	0.418601	1	0.544055	1	0.145885	1	0.154496	1	0.608148	1	0.143077	1	0.614426	1	0.487652	1
76	2	77675871	77873766	197895	90	0.464058	1	0.981828	1	0.487285	1	0.686975	1	0.209286	1	0.429349	1	0.0242293	1	0.912534	1	0.282544	1	0.11408	1	0.0904509	1	0.400027	1	0.095306	1	0.238276	1	0.232829	1	0.539214	1	0.0775745	1	0.423968	1	0.104309	1
77	2	83693539	83697762	4223	8	0.270612	1	0.740602	1	0.810895	1	0.678453	1	0.227295	1	0.257072	1	0.0163252	1	0.496225	1	0.434426	1	0.364288	1	0.16531	1	0.427844	1	0.0946375	1	0.191392	1	0.116335	1	0.648155	1	0.0574506	1	0.270365	1	0.270296	1
78	2	85646753	85648776	2023	5	0.486622	1	0.764441	1	0.579793	1	0.196278	1	0.100159	1	0.487879	1	0.0539918	1	0.552266	1	0.220904	1	0.187082	1	0.381692	1	0.221056	1	0.275501	1	0.110597	1	0.120674	1	0.34946	1	0.166597	1	0.30058	1	0.208021	1
79	2	85832974	85867734	34760	11	0.428562	1	0.904117	1	0.781601	1	0.454654	1	0.228377	1	0.406587	1	0.0598416	1	0.573885	1	0.416019	1	0.280392	1	0.142711	1	0.160169	1	0.382711	1	0.0961888	1	0.0983823	1	0.26692	1	0.0607794	1	0.211823	1	0.185701	1
80	2	86532638	86532761	123	2	0.742882	1	0.476825	1	0.263799	1	0.427037	1	0.194518	1	0.641132	1	0.259486	1	0.905653	1	0.166027	1	0.642547	1	0.296088	1	0.0620243	1	0.894733	1	0.0262936	1	0.0139667	1	0.161941	1	0.128848	1	0.0865734	1	0.325354	1
81	2	88639234	88671005	31771	13	0.403876	1	0.200001	1	0.344647	1	0.564053	1	0.422999	1	0.360082	1	0.0750197	1	0.639839	1	0.329162	1	0.957631	1	0.260359	1	0.0480273	1	0.791693	1	0.135241	1	0.108007	1	0.0789193	1	0.167177	1	0.0970496	1	0.705862	1
82	2	89450021	89457958	7937	14	0.750311	1	0.306484	1	0.136869	1	0.394362	1	0.441529	1	0.67088	1	0.511321	1	0.364082	1	0.193914	1	0.837212	1	0.328749	1	0.542197	1	0.974558	1	0.0106636	1	0.0491361	1	0.866895	1	0.158967	1	0.837801	1	0.307375	1
83	2	89760829	89783357	22528	18	0.520924	1	0.146575	1	0.625856	1	0.992898	1	0.27968	1	0.469935	1	0.989451	1	0.930992	1	0.361927	1	0.172395	1	0.129423	1	0.785949	1	0.660966	1	0.539775	1	0.978934	1	0.784375	1	0.575668	1	0.746708	1	0.805554	1
84	2	89902828	89923597	20769	7	0.635133	1	0.0419876	1	0.969494	1	0.887677	1	0.73998	1	0.5716	1	0.203503	1	0.515529	1	0.851727	1	0.244113	1	0.210171	1	0.0313001	1	0.59927	1	0.389873	1	0.446321	1	0.0310955	1	0.793248	1	0.170912	1	0.352486	1
85	2	90107247	90107565	318	4	0.955555	1	0.240384	1	0.164306	1	0.362755	1	0.359295	1	0.960706	1	0.4344	1	0.443906	1	0.190309	1	0.425222	1	0.217203	1	0.0755992	1	0.798398	1	0.152132	1	0.109567	1	0.124552	1	0.10254	1	0.223989	1	0.313238	1
86	2	90687682	90704935	17253	30	0.312185	1	0.637597	1	0.152248	1	0.968163	1	0.937516	1	0.36106	1	0.214272	1	0.0443975	1	0.422533	1	0.145741	1	0.834566	1	0.262113	1	0.860528	1	0.872914	1	0.60585	1	0.166968	1	0.405773	1	0.200868	1	0.848502	1
87	2	95223572	95293225	69653	17	0.695117	1	0.158993	1	0.681974	1	0.318162	1	0.612229	1	0.595783	1	0.674998	1	0.441687	1	0.970853	1	0.987328	1	0.714755	1	0.473311	1	0.324768	1	0.210108	1	0.0987433	1	0.733064	1	0.398489	1	0.976562	1	0.656089	1
88	2	95432355	95501943	69588	14	0.701103	1	0.092728	1	0.681448	1	0.224687	1	0.571528	1	0.644758	1	0.884087	1	0.463196	1	0.947879	1	0.815245	1	0.391638	1	0.9273	1	0.278079	1	0.262731	1	0.213457	1	0.809418	1	0.435422	1	0.966031	1	0.834458	1
89	2	95601049	95660090	59041	14	0.686958	1	0.0704043	1	0.906555	1	0.697702	1	0.631208	1	0.627048	1	0.625364	1	0.571573	1	0.851609	1	0.768309	1	0.92189	1	0.753969	1	0.539196	1	0.538867	1	0.442404	1	0.892461	1	0.597624	1	0.936885	1	0.5961	1
90	2	97990327	98098900	108573	16	0.316616	1	0.295707	1	0.564033	1	0.988306	1	0.383986	1	0.288407	1	0.791955	1	0.902391	1	0.414176	1	0.438583	1	0.642195	1	0.205192	1	0.856641	1	0.588999	1	0.926365	1	0.148223	1	0.0586417	1	0.523148	1	0.456402	1
91	2	98502651	98504185	1534	7	0.091292	1	0.241006	1	0.260797	1	0.647994	1	0.773724	1	0.0702757	1	0.658548	1	0.642693	1	0.42338	1	0.369651	1	0.206646	1	0.841913	1	0.405294	1	0.663747	1	0.739786	1	0.753356	1	0.346456	1	0.112163	1	0.54665	1
92	2	99858667	99872693	14026	6	0.618185	1	0.449703	1	0.426154	1	0.458091	1	0.248893	1	0.579762	1	0.721117	1	0.972314	1	0.259297	1	0.560098	1	0.562325	1	0.619142	1	0.679336	1	0.0248247	1	0.00862875	1	0.880529	1	0.318503	1	0.599467	1	0.283192	1
93	2	100669661	100698052	28391	7	0.411601	1	0.297345	1	0.358165	1	0.450841	1	0.38958	1	0.356473	1	0.750278	1	0.673719	1	0.301923	1	0.523555	1	0.80546	1	0.530353	1	0.557374	1	0.041447	1	0.0156099	1	0.96924	1	0.265079	1	0.738209	1	0.229351	1
94	2	101400951	101406561	5610	7	0.993635	1	0.262114	1	0.295601	1	0.867758	1	0.251329	1	0.962	1	0.277776	1	0.649029	1	0.207803	1	0.788717	1	0.513765	1	0.516974	1	0.878205	1	0.198417	1	0.126719	1	0.764327	1	0.444187	1	0.704541	1	0.0604258	1
95	2	104754730	104755713	983	6	0.645208	1	0.552646	1	0.691575	1	0.132791	1	0.819319	1	0.635939	1	0.302845	1	0.782349	1	0.712452	1	0.592891	1	0.160603	1	0.815832	1	0.858515	1	0.216647	1	0.129783	1	0.875672	1	0.435999	1	0.393509	1	0.166785	1
96	2	107456118	107456210	92	3	0.529223	1	0.294286	1	0.447669	1	0.243695	1	0.697173	1	0.516677	1	0.547844	1	0.636402	1	0.827993	1	0.262418	1	0.293517	1	0.699143	1	0.869797	1	0.0249698	1	0.192255	1	0.441226	1	0.329884	1	0.595104	1	0.287675	1
97	2	114646550	114812772	166222	53	0.722787	1	0.778947	1	0.018448	1	2.0388e-05	0.0155764	0.531035	1	0.676854	1	0.122347	1	0.0685013	1	0.0854235	1	0.429314	1	0.284781	1	0.412132	1	0.977977	1	0.328465	1	0.762962	1	0.328131	1	0.72251	1	0.142162	1	0.550993	1
98	2	119435715	119443644	7929	14	0.565386	1	0.339331	1	0.0843488	1	0.962406	1	0.119954	1	0.441889	1	0.51691	1	0.479885	1	0.0587386	1	0.856361	1	0.0282201	1	0.164261	1	0.393945	1	0.861078	1	0.561793	1	0.165236	1	0.441327	1	0.701202	1	0.235219	1
99	2	125053391	125067750	14359	7	0.707171	1	0.39478	1	0.29269	1	0.145941	1	0.896503	1	0.705747	1	0.31557	1	0.340024	1	0.574545	1	0.872818	1	0.889735	1	0.899705	1	0.653207	1	0.164488	1	0.29687	1	0.886881	1	0.63821	1	0.369473	1	0.580565	1
100	2	128720236	128721154	918	8	0.750698	1	0.517142	1	0.479738	1	0.517469	1	0.063582	1	0.800764	1	0.0962364	1	0.274451	1	0.141785	1	0.102461	1	0.41685	1	0.19275	1	0.750374	1	0.40244	1	0.278465	1	0.251459	1	0.188571	1	0.803794	1	0.880727	1
101	2	131988279	131995341	7062	4	0.552866	1	0.192344	1	0.916608	1	0.662131	1	0.289728	1	0.493581	1	0.144951	1	0.525164	1	0.516449	1	0.387314	1	0.0619517	1	0.584989	1	0.261174	1	0.95272	1	0.848783	1	0.573708	1	0.88977	1	0.312527	1	0.15734	1
102	2	141299494	141324822	25328	10	0.250545	1	0.217666	1	0.619673	1	0.691037	1	0.863234	1	0.241889	1	0.899365	1	0.646831	1	0.722311	1	0.249401	1	0.268447	1	0.720143	1	0.0256126	1	0.606209	1	0.567384	1	0.818671	1	0.522737	1	0.383085	1	0.449934	1
103	2	142748719	142766622	17903	6	0.147114	1	0.308766	1	0.758815	1	0.68825	1	0.749549	1	0.161602	1	0.545578	1	0.982217	1	0.734826	1	0.0350258	1	0.78193	1	0.383323	1	0.100291	1	0.446076	1	0.506673	1	0.428566	1	0.737109	1	0.303667	1	0.460334	1
104	2	145449366	145461121	11755	12	0.477238	1	0.152258	1	0.595445	1	0.603978	1	0.804208	1	0.51293	1	0.85601	1	0.813139	1	0.645541	1	0.166104	1	0.0140508	1	0.39707	1	0.801666	1	0.600145	1	0.330832	1	0.232713	1	0.877557	1	0.690575	1	0.579473	1
105	2	147347705	147361349	13644	7	0.538909	1	0.179066	1	0.364272	1	0.526209	1	0.54956	1	0.494729	1	0.615892	1	0.701274	1	0.372473	1	0.478994	1	0.44103	1	0.90556	1	0.84236	1	0.0131281	1	0.0623862	1	0.722845	1	0.94781	1	0.98354	1	0.139664	1
106	2	147572128	147572911	783	5	0.0292693	1	0.864121	1	0.434474	1	0.401362	1	0.733389	1	0.0384673	1	0.218202	1	0.331454	1	0.51825	1	0.110438	1	0.124028	1	0.403993	1	0.300828	1	0.656094	1	0.953398	1	0.364902	1	0.154946	1	0.706775	1	0.0936737	1
107	2	148755144	148927143	171999	37	0.867442	1	0.00797117	1	0.577624	1	0.98954	1	0.589861	1	0.883755	1	0.89839	1	0.780394	1	0.520245	1	0.205816	1	0.574955	1	0.156729	1	0.36289	1	0.435171	1	0.310967	1	0.0623544	1	0.949915	1	0.687859	1	0.611296	1
108	2	149137132	149146946	9814	3	0.0607376	1	0.339453	1	0.982464	1	0.491533	1	0.267557	1	0.0618751	1	0.159329	1	0.579889	1	0.53011	1	0.272766	1	0.627271	1	0.133411	1	0.0345746	1	0.282994	1	0.322961	1	0.0502336	1	0.407725	1	0.726124	1	0.178097	1
109	2	150863347	151038740	175393	24	0.674336	1	0.0727502	1	0.33495	1	0.58493	1	0.479119	1	0.689434	1	0.974214	1	0.706648	1	0.334592	1	0.942801	1	0.278633	1	0.29249	1	0.0305837	1	0.350424	1	0.238978	1	0.13283	1	0.638829	1	0.504384	1	0.152779	1
110	2	152838130	152838140	10	3	0.0546469	1	0.401307	1	0.0123186	1	0.726014	1	0.781179	1	0.0729334	1	0.0982075	1	0.00845044	1	0.10998	1	0.0615148	1	0.812594	1	0.757325	1	0.0179173	1	0.574268	1	0.732001	1	0.667124	1	0.950307	1	0.666615	1	0.397594	1
111	2	157151875	157154538	2663	7	0.302075	1	0.381873	1	0.00290737	1	0.738018	1	0.915623	1	0.433762	1	0.0111872	1	0.00429559	1	0.103899	1	0.617333	1	0.0938165	1	0.906184	1	0.19324	1	0.552967	1	0.402161	1	0.707098	1	0.85228	1	0.419919	1	0.757553	1
112	2	158150954	158151984	1030	7	0.0617539	1	0.121401	1	0.506832	1	0.631897	1	0.814074	1	0.0691754	1	0.251703	1	0.404764	1	0.79433	1	0.371667	1	0.066807	1	0.101585	1	0.0644134	1	0.661907	1	0.630069	1	0.0490778	1	0.194408	1	0.172859	1	0.945013	1
113	2	158641258	158643203	1945	5	0.0177804	1	0.0221834	1	0.78788	1	0.680522	1	0.854977	1	0.0177795	1	0.228585	1	0.886497	1	0.785389	1	0.753557	1	0.130355	1	0.18594	1	0.0567157	1	0.951763	1	0.843485	1	0.123048	1	0.0894194	1	0.0948005	1	0.927112	1
114	2	159276790	159289145	12355	7	0.374187	1	0.164182	1	0.0765564	1	0.378041	1	0.15719	1	0.316823	1	0.621952	1	0.327876	1	0.0618244	1	0.11043	1	0.531134	1	0.723472	1	0.241503	1	0.459113	1	0.431709	1	0.858429	1	0.931522	1	0.391949	1	0.895397	1
115	2	159730233	159749061	18828	7	0.033951	1	0.018188	1	0.505224	1	0.845134	1	0.375078	1	0.0210457	1	0.586205	1	0.823121	1	0.367485	1	0.475976	1	0.280252	1	0.679748	1	0.1784	1	0.237191	1	0.293838	1	0.460333	1	0.789231	1	0.884785	1	0.358227	1
116	2	161562255	161562577	322	2	0.5088	1	0.533925	1	0.164475	1	0.855141	1	0.564478	1	0.550113	1	0.774766	1	0.173923	1	0.257839	1	0.360411	1	0.948387	1	0.970531	1	0.632928	1	0.237317	1	0.079007	1	0.601518	1	0.927405	1	0.748462	1	0.549301	1
117	2	162539702	162582200	42498	13	0.562489	1	0.806339	1	0.229978	1	0.580989	1	0.30162	1	0.49361	1	0.194269	1	0.508527	1	0.209962	1	0.381358	1	0.198754	1	0.899942	1	0.641274	1	0.227309	1	0.149307	1	0.798266	1	0.403387	1	0.296916	1	0.531934	1
118	2	174886491	177803022	2916531	80	0.377332	1	0.465108	1	0.604373	1	0.730097	1	0.381252	1	0.34042	1	0.440725	1	0.99672	1	0.429412	1	0.987644	1	0.0290339	1	0.15938	1	0.390696	1	0.444359	1	0.522315	1	0.166265	1	0.484018	1	0.264665	1	0.750492	1
119	2	181026765	181027369	604	7	0.885164	1	0.584596	1	0.984223	1	0.655419	1	0.292439	1	0.9838	1	0.147279	1	0.176592	1	0.54652	1	0.203575	1	0.447201	1	0.462703	1	0.993046	1	0.920681	1	0.521945	1	0.326829	1	0.174682	1	0.629382	1	0.939663	1
120	3	7421882	7421985	103	2	0.237597	1	0.115767	1	0.85189	1	0.523418	1	0.412588	1	0.201731	1	0.742651	1	0.724808	1	0.555048	1	0.881964	1	0.960571	1	0.484099	1	0.593536	1	0.437545	1	0.429581	1	0.575625	1	0.0532033	1	0.224337	1	0.867057	1
121	3	8555413	8556638	1225	7	0.708179	1	0.223478	1	0.811555	1	0.56657	1	0.212783	1	0.636899	1	0.415411	1	0.722267	1	0.399532	1	0.769148	1	0.39089	1	0.836849	1	0.808546	1	0.934832	1	0.845827	1	0.785438	1	0.0986864	1	0.157363	1	0.559012	1
122	3	10385565	10390978	5413	14	0.135595	1	0.447869	1	0.49387	1	0.327719	1	0.189198	1	0.148514	1	0.117197	1	0.67051	1	0.265657	1	0.132404	1	0.734308	1	0.574562	1	0.118945	1	0.25576	1	0.299529	1	0.361058	1	0.0997348	1	0.988217	1	0.85307	1
123	3	15340258	15819607	479349	47	0.0121259	1	0.928273	1	0.265459	1	0.533272	1	0.404183	1	0.00870654	1	0.631685	1	0.636879	1	0.256772	1	0.402408	1	0.852951	1	0.0595202	1	0.881005	1	0.329854	1	0.338265	1	0.066208	1	0.0256762	1	0.583064	1	0.252471	1
124	3	16902891	16932841	29950	7	0.737054	1	0.437998	1	0.757958	1	0.557765	1	0.90341	1	0.70764	1	0.582641	1	0.554066	1	0.891371	1	0.735969	1	0.999716	1	0.866396	1	0.859965	1	0.789057	1	0.983086	1	0.865907	1	0.105023	1	0.0974669	1	0.978076	1
125	3	18744219	18777414	33195	5	0.302266	1	0.594624	1	0.601821	1	0.405329	1	0.799234	1	0.314616	1	0.544557	1	0.384236	1	0.878091	1	0.358055	1	0.877616	1	0.268347	1	0.504799	1	0.989862	1	0.599508	1	0.163292	1	0.234607	1	0.878271	1	0.404959	1
126	3	19248566	19249465	899	4	0.25506	1	0.558134	1	0.864832	1	0.518162	1	0.277263	1	0.270335	1	0.54806	1	0.253474	1	0.595086	1	0.469104	1	0.724135	1	0.192108	1	0.438712	1	0.99533	1	0.51842	1	0.0999999	1	0.389443	1	0.884417	1	0.666006	1
127	3	19908299	19908553	254	3	0.840713	1	0.553497	1	0.503278	1	0.619447	1	0.358651	1	0.826729	1	0.909704	1	0.871798	1	0.356118	1	0.164894	1	0.939577	1	0.0150457	1	0.351893	1	0.718545	1	0.809665	1	0.00744265	1	0.735986	1	0.510658	1	0.984473	1
128	3	24116353	24157241	40888	9	0.375498	1	0.84293	1	0.0437817	1	0.628023	1	0.247284	1	0.356564	1	0.240156	1	0.360801	1	0.0626948	1	0.487012	1	0.462005	1	0.544684	1	0.038008	1	0.838934	1	0.459109	1	0.626145	1	0.110485	1	0.423156	1	0.12946	1
129	3	27091227	27091625	398	2	0.616104	1	0.983031	1	0.970226	1	0.660997	1	0.380855	1	0.754988	1	0.837843	1	0.550357	1	0.591795	1	0.340202	1	0.543759	1	0.773223	1	0.814862	1	0.922752	1	0.733256	1	0.693496	1	0.762333	1	0.842609	1	0.651733	1
130	3	36939970	36945279	5309	13	0.282612	1	0.951543	1	0.484519	1	0.356437	1	0.489766	1	0.310969	1	0.999561	1	0.740528	1	0.414365	1	0.555728	1	0.61001	1	0.710934	1	0.887809	1	0.37166	1	0.541791	1	0.554096	1	0.275727	1	0.588835	1	0.0399959	1
131	3	38148460	38176970	28510	6	0.464044	1	0.777855	1	0.29187	1	0.122124	1	0.960211	1	0.550627	1	0.956172	1	0.141529	1	0.539669	1	0.409942	1	0.294322	1	0.191191	1	0.309711	1	0.942379	1	0.903323	1	0.136362	1	0.995475	1	0.154982	1	0.0934461	1
132	3	46180539	46182502	1963	3	0.49375	1	0.670269	1	0.459946	1	0.39153	1	0.712861	1	0.579279	1	0.16278	1	0.682099	1	0.503216	1	0.452853	1	0.919988	1	0.530645	1	0.96129	1	0.250671	1	0.906423	1	0.489703	1	0.827707	1	0.656142	1	0.496996	1
133	3	46586743	46615495	28752	4	0.497847	1	0.794711	1	0.933392	1	0.376959	1	0.172416	1	0.571384	1	0.0568918	1	0.300758	1	0.430503	1	0.948351	1	0.96787	1	0.923402	1	0.905782	1	0.413383	1	0.426647	1	0.89446	1	0.920836	1	0.751089	1	0.663037	1
134	3	52324222	52329358	5136	6	0.0166822	1	0.103595	1	0.786268	1	0.712646	1	0.468626	1	0.0213769	1	0.142888	1	0.616725	1	0.57602	1	0.404971	1	0.734143	1	0.98946	1	0.632428	1	0.506711	1	0.97772	1	0.9824	1	0.956345	1	0.799678	1	0.0648804	1
135	3	73340026	73346338	6312	6	0.958935	1	0.214568	1	0.417554	1	0.548671	1	0.0977288	1	0.943588	1	0.330458	1	0.711315	1	0.164158	1	0.659132	1	0.725737	1	0.92871	1	0.0126285	1	0.397173	1	0.315055	1	0.861849	1	0.390715	1	0.731255	1	0.206608	1
136	3	73914056	74346968	432912	73	0.863271	1	0.231042	1	0.526749	1	0.389934	1	0.368729	1	0.881352	1	0.695271	1	0.8249	1	0.393449	1	0.369004	1	0.691142	1	0.691287	1	0.0122138	1	0.260626	1	0.289518	1	0.885415	1	0.379292	1	0.930981	1	0.203341	1
137	3	75378209	75414973	36764	15	0.0611498	1	0.128406	1	0.843141	1	0.350097	1	0.139184	1	0.076944	1	0.0209622	1	0.381366	1	0.361696	1	0.222134	1	0.929046	1	0.795713	1	0.0357792	1	0.621874	1	0.610869	1	0.67305	1	0.131788	1	0.87975	1	0.98908	1
138	3	75623409	75627481	4072	7	0.17954	1	0.179389	1	0.563032	1	0.305242	1	0.22364	1	0.200584	1	0.121303	1	0.660024	1	0.3204	1	0.155266	1	0.935638	1	0.661319	1	0.0498935	1	0.15762	1	0.270107	1	0.429707	1	0.053415	1	0.966326	1	0.741053	1
139	3	75701773	75712088	10315	27	0.150062	1	0.180042	1	0.690811	1	0.711781	1	0.258757	1	0.173742	1	0.0839919	1	0.622092	1	0.407983	1	0.200412	1	0.744965	1	0.922778	1	0.0251749	1	0.241502	1	0.235474	1	0.666703	1	0.0918314	1	0.968143	1	0.716496	1
140	3	75822052	75927523	105471	32	0.642813	1	0.152097	1	0.807319	1	0.207763	1	0.146605	1	0.597384	1	0.400276	1	0.40748	1	0.346222	1	0.0617562	1	0.312482	1	0.930647	1	0.0208435	1	0.509337	1	0.640041	1	0.819102	1	0.54264	1	0.386541	1	0.222061	1
141	3	76770745	76819643	48898	10	0.517463	1	0.207425	1	0.984461	1	0.235628	1	0.540143	1	0.490859	1	0.389285	1	0.424843	1	0.757204	1	0.1288	1	0.455976	1	0.837033	1	0.0289963	1	0.150524	1	0.196042	1	0.899234	1	0.586472	1	0.568998	1	0.0978978	1
142	3	76953923	76971769	17846	6	0.742183	1	0.225379	1	0.937086	1	0.256652	1	0.443992	1	0.748081	1	0.341988	1	0.447374	1	0.717842	1	0.0886771	1	0.425012	1	0.841932	1	0.0284316	1	0.232243	1	0.316968	1	0.960567	1	0.242496	1	0.226595	1	0.0938361	1
143	3	77322331	77371012	48681	13	0.522708	1	0.308159	1	0.974713	1	0.333036	1	0.629469	1	0.543521	1	0.659726	1	0.625398	1	0.792166	1	0.199279	1	0.429322	1	0.972547	1	0.0169635	1	0.251858	1	0.292752	1	0.744177	1	0.274383	1	0.391697	1	0.0968796	1
144	3	77485805	77554692	68887	15	0.63761	1	0.427545	1	0.804434	1	0.42307	1	0.601102	1	0.610881	1	0.247368	1	0.380439	1	0.905353	1	0.18418	1	0.64154	1	0.808679	1	0.054425	1	0.197758	1	0.209107	1	0.939501	1	0.363535	1	0.322628	1	0.0702438	1
145	3	77660467	77714260	53793	12	0.437921	1	0.130706	1	0.702111	1	0.384443	1	0.288119	1	0.429507	1	0.35413	1	0.744271	1	0.424962	1	0.249428	1	0.27582	1	0.849043	1	0.0247198	1	0.43459	1	0.449815	1	0.993238	1	0.282254	1	0.237351	1	0.0666004	1
146	3	79517672	79541183	23511	15	0.767203	1	0.476542	1	0.81747	1	0.986814	1	0.786926	1	0.815802	1	0.0651351	1	0.297921	1	0.993527	1	0.044289	1	0.522392	1	0.249627	1	0.763088	1	0.276181	1	0.359346	1	0.312787	1	0.781156	1	0.22954	1	0.283762	1
147	3	79891997	79907423	15426	4	0.948223	1	0.353125	1	0.831406	1	0.988609	1	0.494658	1	0.944053	1	0.63601	1	0.842211	1	0.630617	1	0.253018	1	0.747147	1	0.854415	1	0.000561215	0.428207	0.377547	1	0.362047	1	0.955385	1	0.934846	1	0.548782	1	0.851591	1
148	3	80082499	80104957	22458	7	0.836088	1	0.360501	1	0.805908	1	0.8686	1	0.537229	1	0.826353	1	0.577813	1	0.899661	1	0.646492	1	0.26246	1	0.965706	1	0.908912	1	0.00196996	1	0.366566	1	0.423043	1	0.918949	1	0.927378	1	0.430762	1	0.649293	1
149	3	80664095	80665695	1600	7	0.594567	1	0.606772	1	0.3989	1	0.343274	1	0.144948	1	0.584692	1	0.194583	1	0.975299	1	0.200158	1	0.131171	1	0.435138	1	0.368527	1	0.00337962	1	0.504079	1	0.438997	1	0.439063	1	0.563599	1	0.255662	1	0.845428	1
150	3	81739495	81746183	6688	6	0.71014	1	0.0549451	1	0.915669	1	0.227871	1	0.706968	1	0.644596	1	0.712868	1	0.702757	1	0.787124	1	0.52526	1	0.783018	1	0.682289	1	0.452149	1	0.788993	1	0.736388	1	0.719826	1	0.0733074	1	0.627227	1	0.548538	1
151	3	82811832	82812650	818	12	0.234543	1	0.0676496	1	0.622285	1	0.842557	1	0.483473	1	0.297746	1	0.109824	1	0.595098	1	0.926651	1	0.480993	1	0.0801927	1	0.245668	1	0.569063	1	0.418095	1	0.710293	1	0.234282	1	0.623264	1	0.935278	1	0.463263	1
152	3	90910494	91030404	119910	12	0.937965	1	0.878801	1	0.891378	1	0.186324	1	0.788006	1	0.868018	1	0.335763	1	0.765946	1	0.82618	1	0.640044	1	0.899578	1	0.31618	1	0.290351	1	0.462017	1	0.466124	1	0.37006	1	0.109435	1	0.621441	1	0.637283	1
153	3	91831940	91835321	3381	7	0.996743	1	0.887333	1	0.978448	1	0.233448	1	0.960021	1	0.92721	1	0.289487	1	0.805131	1	0.99967	1	0.48047	1	0.630957	1	0.370467	1	0.198406	1	0.483891	1	0.491739	1	0.430983	1	0.145987	1	0.62182	1	0.728214	1
154	3	92782636	92787763	5127	2	0.196574	1	0.126876	1	0.74441	1	0.112519	1	0.55174	1	0.162086	1	0.490044	1	0.288505	1	0.864166	1	0.936621	1	0.739184	1	0.256292	1	0.861029	1	0.749132	1	0.464488	1	0.293059	1	0.940844	1	0.220744	1	0.722744	1
155	3	93569096	94040272	471176	40	0.479709	1	0.431578	1	0.976452	1	0.0364827	1	0.901552	1	0.383381	1	0.42289	1	0.947419	1	0.914765	1	0.795454	1	0.241598	1	0.955317	1	0.930441	1	0.302284	1	0.579726	1	0.825824	1	0.55154	1	0.116242	1	0.893541	1
156	3	102697496	102739985	42489	54	0.909032	1	0.729534	1	0.486853	1	0.192633	1	0.0513507	1	0.959134	1	0.521377	1	0.507905	1	0.132907	1	0.61052	1	0.711622	1	0.836617	1	0.801418	1	0.0361547	1	0.00629978	1	0.334128	1	0.721143	1	0.103275	1	0.641137	1
157	3	103421855	103422775	920	8	0.539251	1	0.271194	1	0.708755	1	0.934139	1	0.679466	1	0.463742	1	0.985964	1	0.887266	1	0.640804	1	0.732835	1	0.324747	1	0.105236	1	0.283327	1	0.693171	1	0.457432	1	0.11517	1	0.721309	1	0.14636	1	0.56261	1
158	3	105009284	105009297	13	2	0.974859	1	0.28259	1	0.632434	1	0.121758	1	0.65487	1	0.959456	1	0.929209	1	0.427877	1	0.977254	1	0.512506	1	0.690406	1	0.506772	1	0.955689	1	0.763559	1	0.734929	1	0.515135	1	0.158846	1	0.640868	1	0.341713	1
159	3	110734020	110807739	73719	12	0.397934	1	0.761034	1	0.620467	1	0.550146	1	0.0930535	1	0.449019	1	0.243051	1	0.325247	1	0.210926	1	0.722986	1	0.880453	1	0.533143	1	0.438964	1	0.548239	1	0.240442	1	0.714441	1	0.130339	1	0.346231	1	0.171896	1
160	3	111559680	111562943	3263	4	0.373338	1	0.0744847	1	0.221812	1	0.0342807	1	0.663909	1	0.345367	1	0.815176	1	0.382777	1	0.341357	1	0.292524	1	0.684874	1	0.970883	1	0.73925	1	0.313408	1	0.274262	1	0.731758	1	0.37177	1	0.0324581	1	0.670693	1
161	3	112470201	112489449	19248	15	0.890116	1	0.11376	1	0.121312	1	0.335114	1	0.039932	1	0.820153	1	0.267673	1	0.81359	1	0.037498	1	0.495287	1	0.072598	1	0.918021	1	0.413296	1	0.175439	1	0.175913	1	0.801493	1	0.573573	1	0.662462	1	0.409476	1
162	3	114246547	114456005	209458	37	0.216064	1	0.0343034	1	0.233256	1	0.256954	1	0.00953718	1	0.211234	1	0.462293	1	0.590438	1	0.028179	1	0.159825	1	0.730816	1	0.926608	1	0.264645	1	0.77887	1	0.913233	1	0.93904	1	0.229799	1	0.157556	1	0.913998	1
163	3	116043731	116044155	424	2	0.0473359	1	0.936321	1	0.308346	1	0.819641	1	0.0201835	1	0.059754	1	0.122856	1	0.809531	1	0.0549441	1	0.265978	1	0.788043	1	0.223148	1	0.83517	1	0.313203	1	0.28664	1	0.297271	1	0.723228	1	0.463844	1	0.599871	1
164	3	116517329	116519296	1967	8	0.0554271	1	0.491403	1	0.762295	1	0.811812	1	0.117299	1	0.0680996	1	0.119928	1	0.569102	1	0.290788	1	0.306257	1	0.47342	1	0.305511	1	0.792006	1	0.298625	1	0.263608	1	0.410674	1	0.67783	1	0.796233	1	0.522443	1
165	3	116765381	116765393	12	3	0.00588143	1	0.567781	1	0.700919	1	0.948334	1	0.0896541	1	0.00759812	1	0.0719659	1	0.339077	1	0.233854	1	0.962594	1	0.56456	1	0.676748	1	0.818828	1	0.46525	1	0.41595	1	0.820191	1	0.298114	1	0.515086	1	0.456815	1
166	3	121705472	121715079	9607	33	0.927012	1	0.0572165	1	0.484396	1	0.618656	1	0.739333	1	0.775108	1	0.838713	1	0.620386	1	0.524288	1	0.107697	1	0.0941451	1	0.94029	1	0.595862	1	0.111638	1	0.0552455	1	0.559963	1	0.148256	1	0.292122	1	0.540575	1
167	3	122728997	122729137	140	3	0.508301	1	0.439124	1	0.425018	1	0.304894	1	0.87197	1	0.525211	1	0.137041	1	0.218519	1	0.712645	1	0.0903373	1	0.647491	1	0.67838	1	0.870145	1	0.63845	1	0.690054	1	0.569902	1	0.638768	1	0.757916	1	0.862352	1
168	3	133030667	133030900	233	4	0.230878	1	0.306096	1	0.86054	1	0.538982	1	0.980373	1	0.200976	1	0.916311	1	0.935698	1	0.935304	1	0.301202	1	0.548661	1	0.781886	1	0.411138	1	0.927842	1	0.746559	1	0.698179	1	0.638724	1	0.764851	1	0.904485	1
169	3	135520542	135537289	16747	22	0.315631	1	0.762151	1	0.146192	1	0.121268	1	0.0171866	1	0.273024	1	0.50528	1	0.991665	1	0.0244677	1	0.696311	1	0.464105	1	0.106543	1	0.332585	1	0.94464	1	0.602156	1	0.052781	1	0.353979	1	0.380919	1	0.245418	1
170	3	137032543	137036277	3734	6	0.40704	1	0.122254	1	0.186121	1	0.229174	1	0.121899	1	0.381565	1	0.767255	1	0.507824	1	0.101368	1	0.448593	1	0.267868	1	0.329814	1	0.579609	1	0.973924	1	0.869544	1	0.264006	1	0.202847	1	0.406099	1	0.506273	1
171	3	137487798	137529819	42021	14	0.751068	1	0.00565957	1	0.512143	1	0.0700681	1	0.448319	1	0.825969	1	0.991396	1	0.585743	1	0.413678	1	0.137225	1	0.700946	1	0.439389	1	0.315223	1	0.355488	1	0.17328	1	0.619358	1	0.211899	1	0.77873	1	0.545682	1
172	3	138263100	138275710	12610	5	0.398479	1	0.0600255	1	0.167925	1	0.0465834	1	0.126417	1	0.37923	1	0.550425	1	0.431377	1	0.0963431	1	0.399734	1	0.620899	1	0.74828	1	0.134712	1	0.155397	1	0.233828	1	0.501695	1	0.333688	1	0.826641	1	0.633085	1
173	3	141381217	141384341	3124	8	0.801927	1	0.613844	1	0.561143	1	0.901358	1	0.168874	1	0.758379	1	0.236966	1	0.142461	1	0.658272	1	0.83828	1	0.456206	1	0.800308	1	0.766614	1	0.403411	1	0.918813	1	0.763539	1	0.199465	1	0.188542	1	0.504211	1
174	3	141728366	141728691	325	4	0.441006	1	0.473501	1	0.939594	1	0.940952	1	0.934931	1	0.374579	1	0.464274	1	0.631302	1	0.93418	1	0.224854	1	0.165835	1	0.454914	1	0.675625	1	0.675526	1	0.895627	1	0.435152	1	0.36442	1	0.778688	1	0.837464	1
175	3	142632626	142644531	11905	6	0.496832	1	0.663712	1	0.102297	1	0.825487	1	0.982328	1	0.414814	1	0.831509	1	0.0779234	1	0.352425	1	0.495302	1	0.275383	1	0.884942	1	0.480811	1	0.369068	1	0.48683	1	0.984454	1	0.962164	1	0.738759	1	0.112817	1
176	3	142821258	142823735	2477	8	0.103162	1	0.782825	1	0.92637	1	0.635603	1	0.86904	1	0.0994313	1	0.140326	1	0.797687	1	0.85608	1	0.933158	1	0.373196	1	0.783937	1	0.951595	1	0.722174	1	0.830086	1	0.720697	1	0.686485	1	0.655547	1	0.819337	1
177	3	143512892	143520968	8076	4	0.0151433	1	0.266101	1	0.183169	1	0.103833	1	0.466417	1	0.0275897	1	0.065592	1	0.161487	1	0.234269	1	0.100835	1	0.487511	1	0.645982	1	0.0480464	1	0.931677	1	0.906896	1	0.594025	1	0.603915	1	0.680976	1	0.199104	1
178	4	3458919	3479026	20107	8	0.619421	1	0.272159	1	0.388765	1	0.481308	1	0.219476	1	0.566744	1	0.0994293	1	0.731541	1	0.237182	1	0.0806257	1	0.179196	1	0.0307578	1	0.981073	1	0.0306403	1	0.076941	1	0.056588	1	0.600754	1	0.951134	1	0.636306	1
179	4	6095005	6095833	828	2	0.0524448	1	0.923631	1	0.0991966	1	0.0540479	1	0.0817198	1	0.0478147	1	0.181813	1	0.397036	1	0.0528673	1	0.275305	1	0.797452	1	0.897621	1	0.450955	1	0.412848	1	0.817992	1	0.83841	1	0.704531	1	0.247057	1	0.21424	1
180	4	8414927	8415380	453	3	0.408915	1	0.711184	1	0.987794	1	0.536782	1	0.731542	1	0.422872	1	0.872949	1	0.765449	1	0.85156	1	0.499223	1	0.118255	1	0.967047	1	0.375106	1	0.516837	1	0.938892	1	0.982624	1	0.159129	1	0.659564	1	0.25453	1
181	4	12377058	12377306	248	3	0.819564	1	0.549057	1	0.603388	1	0.661476	1	0.0979598	1	0.73994	1	0.516748	1	0.65308	1	0.213615	1	0.161378	1	0.579073	1	0.862961	1	0.290197	1	0.0798865	1	0.050917	1	0.754362	1	0.706416	1	0.88684	1	0.0497425	1
182	4	19295055	19299440	4385	4	0.165489	1	0.669646	1	0.0573562	1	0.512544	1	0.109317	1	0.116745	1	0.782002	1	0.457645	1	0.043454	1	0.173749	1	0.508189	1	0.116827	1	0.437505	1	0.407506	1	0.885367	1	0.0871947	1	0.916134	1	0.472796	1	0.663908	1
183	4	21584773	21585024	251	4	0.91199	1	0.68238	1	0.482041	1	0.47835	1	0.613385	1	0.975887	1	0.479388	1	0.891127	1	0.494489	1	0.132865	1	0.92873	1	0.975313	1	0.880508	1	0.78332	1	0.400486	1	0.840863	1	0.389899	1	0.353857	1	0.697031	1
184	4	29707218	29784325	77107	22	0.259166	1	0.350857	1	0.901232	1	0.853051	1	0.212394	1	0.248963	1	0.878986	1	0.231221	1	0.422045	1	0.0805503	1	0.194147	1	0.631343	1	0.737907	1	0.558177	1	0.389291	1	0.766413	1	0.592058	1	0.564447	1	0.592199	1
185	4	30266433	30312363	45930	5	0.810565	1	0.498035	1	0.956589	1	0.976395	1	0.762361	1	0.824395	1	0.226999	1	0.631948	1	0.864456	1	0.0181867	1	0.505457	1	0.991821	1	0.93452	1	0.458631	1	0.338585	1	0.79673	1	0.707728	1	0.738166	1	0.890791	1
186	4	56211617	56212288	671	6	0.170778	1	0.875702	1	0.230892	1	0.442076	1	0.491271	1	0.169856	1	0.735782	1	0.48987	1	0.268109	1	0.514686	1	0.741736	1	0.278193	1	0.760106	1	0.630573	1	0.772216	1	0.261277	1	0.239901	1	0.283252	1	0.416805	1
187	4	57769227	57769969	742	10	0.157522	1	0.547844	1	0.754102	1	0.191449	1	0.979683	1	0.16473	1	0.308071	1	0.587564	1	0.829444	1	0.608287	1	0.888979	1	0.73344	1	0.517166	1	0.373921	1	0.436273	1	0.570259	1	0.582868	1	0.503054	1	0.837536	1
188	4	71762125	71768691	6566	4	0.528875	1	0.764832	1	0.146564	1	0.498994	1	0.583277	1	0.420404	1	0.0337564	1	0.0302934	1	0.58506	1	0.826843	1	0.647878	1	0.0167934	1	0.378426	1	0.26917	1	0.217601	1	0.0210398	1	0.0230169	1	0.630074	1	0.380909	1
189	4	77028168	77043306	15138	5	0.689402	1	0.269659	1	0.838258	1	0.273651	1	0.370111	1	0.597091	1	0.629174	1	0.913465	1	0.504239	1	0.409321	1	0.3043	1	0.917183	1	0.0757416	1	0.220563	1	0.34244	1	0.705411	1	0.0232456	1	0.215896	1	0.282893	1
190	4	77228417	77255056	26639	11	0.828811	1	0.113583	1	0.952534	1	0.221817	1	0.778338	1	0.695735	1	0.787679	1	0.895171	1	0.812292	1	0.466128	1	0.123796	1	0.433715	1	0.00756603	1	0.116557	1	0.281217	1	0.565585	1	0.043414	1	0.241794	1	0.299066	1
191	4	81900655	81923439	22784	7	0.803156	1	0.0450903	1	0.644152	1	0.434746	1	0.804494	1	0.883123	1	0.241016	1	0.558463	1	0.895362	1	0.165036	1	0.0332346	1	0.295538	1	0.705242	1	0.657848	1	0.895313	1	0.258469	1	0.203983	1	0.90953	1	0.917766	1
192	4	89041272	89044023	2751	11	0.81808	1	0.269417	1	0.456054	1	0.330747	1	0.423561	1	0.936261	1	0.840044	1	0.749737	1	0.352059	1	0.745066	1	0.359142	1	0.308305	1	0.538336	1	0.737246	1	0.917623	1	0.27246	1	0.0183501	1	0.242188	1	0.605001	1
193	4	89324010	89327913	3903	9	0.282027	1	0.0616048	1	0.602651	1	0.840249	1	0.361157	1	0.218969	1	0.495078	1	0.690472	1	0.408482	1	0.642238	1	0.399677	1	0.163861	1	0.830023	1	0.397306	1	0.533051	1	0.175836	1	0.0519819	1	0.828142	1	0.404464	1
194	4	98039179	98039527	348	2	0.678272	1	0.866297	1	0.816712	1	0.214638	1	0.923399	1	0.727309	1	0.31196	1	0.997186	1	0.868602	1	0.814573	1	0.00253166	1	0.68616	1	0.259816	1	0.337375	1	0.511306	1	0.789181	1	0.460406	1	0.657494	1	0.724191	1
195	4	99656586	99659910	3324	8	0.586144	1	0.125097	1	0.0279175	1	0.440959	1	0.194517	1	0.473738	1	0.543584	1	0.210513	1	0.0395701	1	0.257639	1	0.423075	1	0.656854	1	0.537268	1	0.177939	1	0.0976084	1	0.971464	1	0.547385	1	0.744828	1	0.919328	1
196	4	101601485	101601817	332	3	0.43261	1	0.919693	1	0.0899317	1	0.529592	1	0.409564	1	0.440056	1	0.91007	1	0.109423	1	0.13909	1	0.54192	1	0.148461	1	0.435346	1	0.703998	1	0.873931	1	0.441886	1	0.517016	1	0.964714	1	0.544669	1	0.428937	1
197	4	105739813	105741093	1280	4	0.240233	1	0.856823	1	0.688982	1	0.941345	1	0.66586	1	0.253513	1	0.0323291	1	0.577624	1	0.971522	1	0.960514	1	0.287652	1	0.708469	1	0.0630261	1	0.773256	1	0.94561	1	0.671739	1	0.0129146	1	0.148319	1	0.873293	1
198	4	108610948	108611085	137	3	0.338003	1	0.0231237	1	0.049443	1	0.668753	1	0.19426	1	0.304332	1	0.617037	1	0.194979	1	0.0593191	1	0.710925	1	0.943686	1	0.110923	1	0.220821	1	0.981514	1	0.702705	1	0.0579004	1	0.838692	1	0.892909	1	0.389062	1
199	4	111745396	112286229	540833	112	0.0451375	1	0.420057	1	0.748134	1	0.28921	1	0.605926	1	0.0491359	1	0.673167	1	0.534357	1	0.907614	1	0.653477	1	0.841578	1	0.535941	1	0.9981	1	0.907858	1	0.396845	1	0.353899	1	0.329018	1	0.0113134	1	0.115116	1
200	4	112348832	113968233	1619401	160	0.0241214	1	0.302438	1	0.0305373	1	0.346573	1	0.589213	1	0.0384372	1	0.681903	1	0.0620154	1	0.120613	1	0.301639	1	0.998387	1	0.788764	1	0.636873	1	0.951634	1	0.679977	1	0.686735	1	0.140495	1	0.0124781	1	0.0532711	1
201	4	121651872	122237050	585178	26	0.457772	1	0.203904	1	0.148449	1	0.913389	1	0.639667	1	0.474861	1	0.892498	1	0.298857	1	0.270291	1	0.419476	1	0.141269	1	0.25764	1	0.120324	1	0.577996	1	0.51678	1	0.284166	1	0.527455	1	0.74572	1	0.303489	1
202	4	143201660	143205948	4288	12	0.960772	1	0.150037	1	0.354811	1	0.39977	1	0.467313	1	0.985124	1	0.697631	1	0.722366	1	0.360966	1	0.470546	1	0.533707	1	0.403586	1	0.0129081	1	0.159115	1	0.316272	1	0.226942	1	0.20348	1	0.998824	1	0.351635	1
203	4	143539831	143555553	15722	14	0.412504	1	0.333071	1	0.139149	1	0.450164	1	0.537977	1	0.454595	1	0.298329	1	0.202046	1	0.238017	1	0.10012	1	0.766168	1	0.909591	1	0.0241995	1	0.110509	1	0.35082	1	0.889733	1	0.08391	1	0.822474	1	0.702236	1
204	4	144334174	144334795	621	4	0.607955	1	0.585199	1	0.288954	1	0.325551	1	0.835066	1	0.599909	1	0.816073	1	0.276402	1	0.602002	1	0.626493	1	0.391092	1	0.241656	1	0.609234	1	0.156898	1	0.414293	1	0.126107	1	0.46469	1	0.681147	1	0.509424	1
205	4	145452418	146034593	582175	33	0.546624	1	0.482584	1	0.521651	1	0.61649	1	0.769821	1	0.533935	1	0.365778	1	0.319451	1	0.830273	1	0.36908	1	0.689099	1	0.384783	1	0.782902	1	0.431485	1	0.927048	1	0.350732	1	0.476254	1	0.896774	1	0.681887	1
206	4	146941153	147202567	261414	33	0.775356	1	0.691947	1	0.302892	1	0.525387	1	0.718632	1	0.731804	1	0.55227	1	0.108954	1	0.694175	1	0.478744	1	0.534623	1	0.360555	1	0.740953	1	0.641876	1	0.665219	1	0.375406	1	0.440562	1	0.877198	1	0.795027	1
207	4	155497765	155507226	9461	9	0.991261	1	0.667047	1	0.917736	1	0.497638	1	0.367609	1	0.941812	1	0.804428	1	0.355291	1	0.584971	1	0.295367	1	0.77251	1	0.931458	1	0.337235	1	0.425087	1	0.52978	1	0.924937	1	0.94688	1	0.722407	1	0.669542	1
208	5	3499602	3519482	19880	13	0.200784	1	0.317076	1	0.814336	1	0.783055	1	0.427631	1	0.173015	1	0.203734	1	0.585442	1	0.567029	1	0.604784	1	0.164544	1	0.935262	1	0.389738	1	0.211561	1	0.350621	1	0.734199	1	0.17199	1	0.276454	1	0.315906	1
209	5	3884799	3922844	38045	15	0.924293	1	0.750723	1	0.478694	1	0.919341	1	0.918714	1	0.971941	1	0.780271	1	0.552485	1	0.636109	1	0.432069	1	0.157721	1	0.794624	1	0.357951	1	0.483726	1	0.963699	1	0.770861	1	0.0435907	1	0.222817	1	0.561959	1
210	5	4844004	4869796	25792	9	0.41505	1	0.21869	1	0.614779	1	0.567632	1	0.64009	1	0.358293	1	0.494708	1	0.991555	1	0.58495	1	0.414978	1	0.294029	1	0.558337	1	0.139213	1	0.34659	1	0.574436	1	0.424731	1	0.0675527	1	0.23807	1	0.23092	1
211	5	5129103	5135345	6242	9	0.819627	1	0.74336	1	0.459861	1	0.673609	1	0.816671	1	0.71395	1	0.780254	1	0.55687	1	0.56868	1	0.207785	1	0.199201	1	0.962369	1	0.439498	1	0.351873	1	0.644081	1	0.867318	1	0.048309	1	0.290738	1	0.429123	1
212	5	5538674	5547973	9299	10	0.669332	1	0.605711	1	0.52034	1	0.562315	1	0.463257	1	0.629451	1	0.331595	1	0.949988	1	0.438336	1	0.528248	1	0.272303	1	0.992348	1	0.427297	1	0.258799	1	0.516509	1	0.854437	1	0.0608492	1	0.201726	1	0.473115	1
213	5	5584666	5584972	306	7	0.211315	1	0.177277	1	0.789199	1	0.429136	1	0.469803	1	0.177092	1	0.276822	1	0.648293	1	0.583681	1	0.324676	1	0.521289	1	0.582446	1	0.331261	1	0.250125	1	0.316186	1	0.37772	1	0.0808103	1	0.194047	1	0.323035	1
214	5	5954742	6110511	155769	34	0.229818	1	0.0952588	1	0.695774	1	0.785418	1	0.277081	1	0.202881	1	0.0968274	1	0.541148	1	0.414276	1	0.674324	1	0.80916	1	0.513742	1	0.245878	1	0.330412	1	0.401517	1	0.340814	1	0.152442	1	0.13799	1	0.32374	1
215	5	6935526	6993918	58392	8	0.280589	1	0.158077	1	0.51796	1	0.676113	1	0.219496	1	0.234465	1	0.201129	1	0.788739	1	0.288354	1	0.374357	1	0.651358	1	0.575184	1	0.40123	1	0.270467	1	0.332984	1	0.379491	1	0.173496	1	0.36567	1	0.30867	1
216	5	7031786	7048239	16453	7	0.984032	1	0.189723	1	0.440039	1	0.549003	1	0.620456	1	0.977148	1	0.23137	1	0.663402	1	0.48625	1	0.714028	1	0.394586	1	0.527492	1	0.273629	1	0.198358	1	0.104051	1	0.249672	1	0.908863	1	0.807379	1	0.592507	1
217	5	7052180	7171279	119099	18	0.227811	1	0.211472	1	0.309	1	0.776774	1	0.192536	1	0.192281	1	0.302685	1	0.939567	1	0.184832	1	0.429363	1	0.341847	1	0.510748	1	0.272514	1	0.420557	1	0.624648	1	0.388452	1	0.173382	1	0.237443	1	0.152421	1
218	5	7989617	8014367	24750	6	0.619136	1	0.226377	1	0.306696	1	0.474037	1	0.519655	1	0.527177	1	0.390251	1	0.469394	1	0.3384	1	0.519974	1	0.324458	1	0.276123	1	0.645623	1	0.724185	1	0.919956	1	0.238915	1	0.783967	1	0.614744	1	0.640848	1
219	5	10100240	10117317	17077	11	0.213435	1	0.535401	1	0.522736	1	0.904632	1	0.190483	1	0.206424	1	0.209891	1	0.743018	1	0.272776	1	0.965845	1	0.0534182	1	0.485018	1	0.844435	1	0.204865	1	0.349499	1	0.610641	1	0.079519	1	0.82699	1	0.484447	1
220	5	10562250	10612072	49822	9	0.131184	1	0.306237	1	0.995399	1	0.639433	1	0.278026	1	0.145362	1	0.40746	1	0.355414	1	0.54562	1	0.802104	1	0.0191105	1	0.127887	1	0.344445	1	0.280049	1	0.204329	1	0.185388	1	0.219648	1	0.494819	1	0.107347	1
221	5	10785521	11246794	461273	17	0.450926	1	0.71549	1	0.577939	1	0.283751	1	0.897004	1	0.400192	1	0.312588	1	0.545666	1	0.703804	1	0.653343	1	0.897531	1	0.401753	1	0.479196	1	0.397628	1	0.777537	1	0.311765	1	0.358594	1	0.837494	1	0.679055	1
222	5	12178347	12178906	559	4	0.579345	1	0.213512	1	0.860627	1	0.863048	1	0.460665	1	0.673083	1	0.182979	1	0.366992	1	0.606897	1	0.143023	1	0.0619415	1	0.111183	1	0.755458	1	0.37327	1	0.4687	1	0.122203	1	0.816633	1	0.887346	1	0.94478	1
223	5	24721251	24722132	881	2	0.115218	1	0.26353	1	0.000966454	0.737405	0.220814	1	0.417844	1	0.0779747	1	0.2446	1	0.0174479	1	0.0166564	1	0.308503	1	0.189467	1	0.72768	1	0.570241	1	0.334901	1	0.155193	1	0.987798	1	0.748608	1	0.658349	1	0.650116	1
224	5	24735376	24752262	16886	8	0.75753	1	0.898547	1	0.920547	1	0.181912	1	0.106942	1	0.759388	1	0.160813	1	0.514036	1	0.336697	1	0.879977	1	0.393868	1	0.795985	1	0.64959	1	0.203795	1	0.444948	1	0.615695	1	0.869969	1	0.95607	1	0.509583	1
225	5	37404544	37441150	36606	12	0.326254	1	0.905416	1	0.439514	1	0.407548	1	0.0104215	1	0.325193	1	0.843867	1	0.602591	1	0.0626036	1	0.966681	1	0.442075	1	0.599829	1	0.763978	1	0.67935	1	0.992078	1	0.560613	1	0.527245	1	0.991433	1	0.961697	1
226	5	52175933	52192752	16819	9	0.107015	1	0.383711	1	0.600311	1	0.463697	1	0.43573	1	0.0906632	1	0.610659	1	0.903161	1	0.449183	1	0.909277	1	0.296286	1	0.0578994	1	0.357354	1	0.744923	1	0.644116	1	0.0241319	1	0.226272	1	0.183894	1	0.347094	1
227	5	54011829	54052518	40689	9	0.37464	1	0.50459	1	0.338999	1	0.694592	1	0.770531	1	0.476944	1	0.511737	1	0.204022	1	0.708024	1	0.110233	1	0.511304	1	0.142345	1	0.25446	1	0.536574	1	0.66074	1	0.130465	1	0.873968	1	0.446931	1	0.846785	1
228	5	54883390	54937412	54022	16	0.561712	1	0.731197	1	0.760537	1	0.174649	1	0.260276	1	0.545706	1	0.514225	1	0.517131	1	0.417977	1	0.658888	1	0.902815	1	0.941566	1	0.203516	1	0.457079	1	0.290416	1	0.829243	1	0.349866	1	0.157287	1	0.115984	1
229	5	55418075	55483118	65043	10	0.705763	1	0.946573	1	0.819203	1	0.299327	1	0.44746	1	0.679799	1	0.375054	1	0.303059	1	0.762539	1	0.780214	1	0.441755	1	0.509	1	0.214957	1	0.133284	1	0.162969	1	0.728603	1	0.462638	1	0.198876	1	0.114381	1
230	5	56051344	56105526	54182	22	0.788709	1	0.499133	1	0.999239	1	0.209022	1	0.167655	1	0.750954	1	0.258881	1	0.175623	1	0.432167	1	0.963915	1	0.44104	1	0.720735	1	0.138109	1	0.120721	1	0.147964	1	0.998832	1	0.58967	1	0.22614	1	0.178335	1
231	5	56305332	56639679	334347	64	0.313741	1	0.348749	1	0.941273	1	0.272579	1	0.481551	1	0.297535	1	0.436077	1	0.329457	1	0.724161	1	0.804687	1	0.167062	1	0.97143	1	0.405821	1	0.124688	1	0.172513	1	0.737244	1	0.617975	1	0.260189	1	0.128029	1
232	5	57133588	57340535	206947	46	0.615672	1	0.319428	1	0.934789	1	0.303131	1	0.295001	1	0.569652	1	0.198305	1	0.18076	1	0.589107	1	0.598823	1	0.263729	1	0.766069	1	0.339784	1	0.0688954	1	0.0947276	1	0.8985	1	0.740698	1	0.203767	1	0.227048	1
233	5	57523177	57665253	142076	34	0.491194	1	0.668039	1	0.953739	1	0.160077	1	0.479967	1	0.446991	1	0.30675	1	0.2766	1	0.717102	1	0.334325	1	0.624999	1	0.74683	1	0.49623	1	0.0798391	1	0.161123	1	0.971783	1	0.613637	1	0.187871	1	0.158963	1
234	5	57802748	57881343	78595	10	0.738768	1	0.807415	1	0.896766	1	0.250774	1	0.37868	1	0.719034	1	0.348843	1	0.352242	1	0.563996	1	0.577496	1	0.53207	1	0.582858	1	0.322619	1	0.0368087	1	0.0852307	1	0.892653	1	0.676746	1	0.237943	1	0.104744	1
235	5	58053095	58082352	29257	10	0.764037	1	0.628846	1	0.640604	1	0.270457	1	0.74797	1	0.847488	1	0.13372	1	0.203536	1	0.923131	1	0.500495	1	0.96393	1	0.612672	1	0.417501	1	0.0589019	1	0.22798	1	0.82056	1	0.612147	1	0.207803	1	0.786502	1
236	5	58311716	58332254	20538	11	0.798006	1	0.361871	1	0.743747	1	0.0830929	1	0.415756	1	0.898132	1	0.183805	1	0.190746	1	0.803201	1	0.744585	1	0.95491	1	0.755633	1	0.60047	1	0.253783	1	0.677429	1	0.644701	1	0.745998	1	0.532226	1	0.637657	1
237	5	59737484	59830718	93234	21	0.0336448	1	0.292695	1	0.683674	1	0.0389337	1	0.502915	1	0.0304039	1	0.266474	1	0.209938	1	0.885282	1	0.372859	1	0.781471	1	0.310854	1	0.690604	1	0.161667	1	0.15955	1	0.448504	1	0.792151	1	0.67096	1	0.428608	1
238	5	61916323	61982272	65949	12	0.882875	1	0.0959184	1	0.93746	1	0.554128	1	0.345006	1	0.848125	1	0.914501	1	0.749698	1	0.565685	1	0.626871	1	0.287578	1	0.42578	1	0.869666	1	0.072258	1	0.0452157	1	0.70792	1	0.316087	1	0.753256	1	0.978695	1
239	5	63315493	63315979	486	3	0.554464	1	0.137732	1	0.824431	1	0.460424	1	0.434339	1	0.630716	1	0.699685	1	0.707869	1	0.767585	1	0.254732	1	0.971589	1	0.260841	1	0.410223	1	0.0169439	1	0.00184963	1	0.665551	1	0.880774	1	0.755366	1	0.0286469	1
240	5	65457666	65458442	776	4	0.429142	1	0.733923	1	0.166085	1	0.787511	1	0.137715	1	0.519581	1	0.371717	1	0.981006	1	0.0935127	1	0.164179	1	0.575235	1	0.105022	1	0.63158	1	0.108427	1	0.0808921	1	0.193705	1	0.790297	1	0.0985077	1	1.49608e-06	0.00114301
241	5	72864953	72887910	22957	4	0.732229	1	0.675304	1	0.547639	1	0.779637	1	0.936306	1	0.699511	1	0.171516	1	0.51183	1	0.688168	1	0.3003	1	0.75336	1	0.50919	1	0.861546	1	0.675109	1	0.93087	1	0.44715	1	0.00818925	1	0.261105	1	0.0198551	1
242	5	73849774	73880229	30455	12	0.311206	1	0.282679	1	0.13263	1	0.28946	1	0.24635	1	0.30783	1	0.702298	1	0.442868	1	0.125298	1	0.597573	1	0.965501	1	0.422799	1	0.98874	1	0.843649	1	0.992891	1	0.377009	1	0.137011	1	0.425451	1	0.113498	1
243	5	77492850	77510553	17703	9	0.0892202	1	0.151589	1	0.475249	1	0.301631	1	0.936606	1	0.122329	1	0.971886	1	0.347722	1	0.654753	1	0.305148	1	0.406981	1	0.466406	1	0.835209	1	0.595791	1	0.129471	1	0.699363	1	0.915627	1	0.625167	1	0.256207	1
244	5	77654536	77670776	16240	4	0.711085	1	0.261763	1	0.961508	1	0.924739	1	0.853447	1	0.679654	1	0.711938	1	0.903385	1	0.910005	1	0.565922	1	0.194071	1	0.280351	1	0.67403	1	0.394071	1	0.144428	1	0.428635	1	0.177261	1	0.208021	1	0.0199034	1
245	5	79306300	79320284	13984	5	0.014508	1	0.282964	1	0.893663	1	0.395549	1	0.77034	1	0.0150235	1	0.95073	1	0.999585	1	0.790186	1	0.808278	1	0.521763	1	0.347622	1	0.417151	1	0.597633	1	0.287277	1	0.458796	1	0.391913	1	0.602014	1	0.301421	1
246	5	84551530	84563500	11970	10	0.43494	1	0.275285	1	0.395909	1	0.303047	1	0.407191	1	0.357147	1	0.961105	1	0.167585	1	0.961345	1	0.269185	1	0.53	1	0.769443	1	0.926964	1	0.899112	1	0.736216	1	0.8211	1	0.974503	1	0.392477	1	0.753619	1
247	5	85651181	85653617	2436	3	0.507931	1	0.188818	1	0.359193	1	0.283041	1	0.40869	1	0.414987	1	0.971604	1	0.135068	1	0.928974	1	0.32931	1	0.879309	1	0.934521	1	0.537497	1	0.763006	1	0.653121	1	0.828194	1	0.916124	1	0.351911	1	0.585473	1
248	5	88583061	88583112	51	4	0.363351	1	0.636246	1	0.742182	1	0.121577	1	0.964535	1	0.355727	1	0.557128	1	0.853213	1	0.810226	1	0.42911	1	0.851239	1	0.712031	1	0.458467	1	0.305072	1	0.642674	1	0.595416	1	0.085612	1	0.0838761	1	0.659184	1
249	5	89769116	89769508	392	3	0.57156	1	0.908086	1	0.549734	1	0.394874	1	0.487883	1	0.515516	1	0.499665	1	0.884746	1	0.46129	1	0.446377	1	0.908626	1	0.673562	1	0.139753	1	0.121273	1	0.369337	1	0.478401	1	0.136188	1	0.0199474	1	0.088472	1
250	5	91008627	91008703	76	3	0.667331	1	0.0532633	1	0.0579827	1	0.768217	1	0.00961572	1	0.663989	1	0.589637	1	0.570427	1	0.00951127	1	0.865394	1	0.471431	1	0.277961	1	0.726128	1	0.0057905	1	0.15461	1	0.411219	1	0.629414	1	0.952755	1	0.608311	1
251	5	93157395	93174537	17142	3	0.678808	1	0.428144	1	0.615784	1	0.0762418	1	0.217372	1	0.64944	1	0.361594	1	0.50079	1	0.324892	1	0.729476	1	0.943089	1	0.817949	1	0.190967	1	0.847652	1	0.939206	1	0.825807	1	0.405744	1	0.346254	1	0.471053	1
252	5	94161655	96262456	2100801	10	0.553898	1	0.414931	1	0.452084	1	0.32139	1	0.625045	1	0.516335	1	0.340348	1	0.832195	1	0.463036	1	0.553909	1	0.523608	1	0.789783	1	0.398603	1	0.847232	1	0.527302	1	0.643627	1	0.656272	1	0.379642	1	0.178757	1
253	5	105034912	105359320	324408	61	0.0359293	1	0.465909	1	0.954224	1	0.36015	1	0.238336	1	0.0369333	1	0.37684	1	0.209554	1	0.542169	1	0.657244	1	0.526622	1	0.117516	1	0.369289	1	0.117789	1	0.472041	1	0.121258	1	0.110968	1	0.725894	1	0.632009	1
254	5	105511760	105511768	8	3	0.0290679	1	0.328463	1	0.115765	1	0.52335	1	0.602164	1	0.0365235	1	0.628103	1	0.0527826	1	0.224534	1	0.56247	1	0.304137	1	0.153869	1	0.854374	1	0.159087	1	0.28949	1	0.191915	1	0.469009	1	0.201795	1	0.793108	1
255	5	108854265	108854385	120	4	0.578306	1	0.0712812	1	0.498692	1	0.620512	1	0.641901	1	0.587741	1	0.812134	1	0.601975	1	0.49888	1	0.364557	1	0.503144	1	0.245578	1	0.805925	1	0.410192	1	0.864866	1	0.215685	1	0.408431	1	0.414515	1	0.399278	1
256	5	109297277	109405615	108338	12	0.823159	1	0.903731	1	0.318077	1	0.179518	1	0.893776	1	0.735735	1	0.614432	1	0.113362	1	0.607897	1	0.181382	1	0.197624	1	0.6243	1	0.922479	1	0.938189	1	0.899872	1	0.55324	1	0.903973	1	0.578674	1	0.441282	1
257	5	112964873	112965257	384	3	0.377493	1	0.33481	1	0.503843	1	0.228398	1	0.634309	1	0.374756	1	0.742402	1	0.675628	1	0.514852	1	0.229314	1	0.583001	1	0.368669	1	0.861539	1	0.187142	1	0.293195	1	0.188595	1	0.93546	1	0.471296	1	0.0947288	1
258	5	114023755	114025841	2086	5	0.743145	1	0.329736	1	0.551694	1	0.0547585	1	0.363003	1	0.668951	1	0.8854	1	0.868027	1	0.384017	1	0.449153	1	0.46529	1	0.476693	1	0.391079	1	0.92311	1	0.752397	1	0.475279	1	0.830686	1	0.663438	1	0.854327	1
259	5	116694063	116703656	9593	6	0.116772	1	0.52172	1	0.781344	1	0.86456	1	0.673655	1	0.111738	1	0.19798	1	0.793218	1	0.689199	1	0.773916	1	0.53071	1	0.992053	1	0.268019	1	0.472682	1	0.37501	1	0.816208	1	0.267747	1	0.505298	1	0.824391	1
260	5	118388158	118390795	2637	9	0.0865783	1	0.786389	1	0.00504146	1	0.278756	1	0.00670139	1	0.0570844	1	0.0762684	1	0.379726	1	0.00131551	1	0.119759	1	0.604793	1	0.933747	1	0.698602	1	0.448875	1	0.584601	1	0.950821	1	0.534474	1	0.786778	1	0.295759	1
261	5	139004112	139005838	1726	8	0.606531	1	0.276382	1	0.0955118	1	0.0777615	1	0.248278	1	0.453515	1	0.322022	1	0.261812	1	0.0934269	1	0.179313	1	0.83445	1	0.674817	1	0.137077	1	0.515274	1	0.275638	1	0.440081	1	0.853805	1	0.685122	1	0.831856	1
262	5	147753247	147754272	1025	9	0.618311	1	0.816569	1	0.655286	1	0.282728	1	0.70647	1	0.580976	1	0.355421	1	0.278292	1	0.979052	1	0.00370711	1	0.277205	1	0.549027	1	0.865613	1	0.504943	1	0.408228	1	0.373797	1	0.279818	1	0.298171	1	0.572977	1
263	5	148493203	148495504	2301	12	0.0368095	1	0.283529	1	0.906076	1	0.685786	1	0.766001	1	0.0382576	1	0.969759	1	0.704866	1	0.928205	1	0.635647	1	0.125521	1	0.599723	1	0.731703	1	0.573607	1	0.639569	1	0.470628	1	0.487118	1	0.790497	1	0.765315	1
264	6	7932634	7938483	5849	11	0.0703018	1	0.482502	1	0.988932	1	0.663621	1	0.555797	1	0.0776184	1	0.00838148	1	0.8088	1	0.753684	1	0.147153	1	0.339552	1	0.486374	1	0.819761	1	0.949959	1	0.803341	1	0.472919	1	0.0664918	1	0.430215	1	0.711701	1
265	6	8041854	8049012	7158	12	0.044231	1	0.981441	1	0.743494	1	0.983688	1	0.333541	1	0.0491687	1	0.00673668	1	0.794248	1	0.476181	1	0.179857	1	0.189605	1	0.319488	1	0.855857	1	0.818027	1	0.58932	1	0.331908	1	0.0310773	1	0.374507	1	0.826991	1
266	6	15857424	15864027	6603	8	0.15464	1	0.304009	1	0.378379	1	0.0736103	1	0.357614	1	0.149941	1	0.776483	1	0.993198	1	0.316973	1	0.606643	1	0.0984582	1	0.861103	1	0.687824	1	0.404851	1	0.57437	1	0.731522	1	0.758711	1	0.183783	1	0.220312	1
267	6	23304438	23304526	88	2	0.0496762	1	0.438527	1	0.0513376	1	0.550807	1	0.443481	1	0.03837	1	0.899476	1	0.145785	1	0.120901	1	0.119983	1	0.478572	1	0.69402	1	0.146305	1	0.859705	1	0.75595	1	0.73146	1	0.542226	1	0.255674	1	0.823326	1
268	6	24062606	24063639	1033	6	0.310346	1	0.508559	1	0.00715614	1	0.786267	1	0.073758	1	0.263312	1	0.356091	1	0.0889775	1	0.00903793	1	0.860345	1	0.59976	1	0.823527	1	0.00135719	1	0.596219	1	0.319698	1	0.986239	1	0.266505	1	0.67255	1	0.400562	1
269	6	33119386	33120432	1046	3	0.645843	1	0.743936	1	0.100522	1	0.258963	1	0.18365	1	0.600929	1	0.829118	1	0.178821	1	0.0862062	1	0.0153767	1	0.16148	1	0.390997	1	0.780254	1	0.900418	1	0.752342	1	0.379359	1	0.933789	1	0.297022	1	0.730746	1
270	6	34205393	34221475	16082	8	0.243613	1	0.90266	1	0.146592	1	0.0377027	1	0.0147817	1	0.252993	1	0.149588	1	0.799833	1	0.0249027	1	0.0367251	1	0.123449	1	0.569352	1	0.302062	1	0.713141	1	0.500031	1	0.641054	1	0.665994	1	0.0798242	1	0.799717	1
271	6	41994493	42018238	23745	6	0.661197	1	0.82183	1	0.765749	1	0.955275	1	0.147118	1	0.691094	1	0.0786744	1	0.0798901	1	0.502903	1	0.808067	1	0.479448	1	0.342433	1	0.74646	1	0.795149	1	0.82294	1	0.258088	1	0.000619687	0.473441	0.361055	1	0.550302	1
272	6	45499299	45520306	21007	9	0.437096	1	0.237678	1	0.490472	1	0.993457	1	0.100034	1	0.444821	1	0.0367608	1	0.770555	1	0.17688	1	0.555219	1	0.372455	1	0.0228543	1	0.0754664	1	0.39187	1	0.0867661	1	0.0421483	1	0.867513	1	0.339196	1	0.734951	1
273	6	67402363	67416752	14389	10	0.924884	1	0.69498	1	0.317792	1	0.136385	1	0.459714	1	0.992195	1	0.363928	1	0.0270296	1	0.883928	1	0.807362	1	0.494695	1	0.374357	1	0.22524	1	0.636516	1	0.900105	1	0.308904	1	0.629403	1	0.129793	1	0.194295	1
274	6	67506071	67662275	156204	15	0.794395	1	0.819868	1	0.921924	1	0.641272	1	0.41841	1	0.816892	1	0.713159	1	0.387311	1	0.598696	1	0.840266	1	0.618888	1	0.67974	1	0.450908	1	0.617545	1	0.770601	1	0.591977	1	0.355608	1	0.125123	1	0.135175	1
275	6	67876359	68253141	376782	109	0.38535	1	0.560772	1	0.14227	1	0.695713	1	0.821549	1	0.298194	1	0.385635	1	0.0552362	1	0.332779	1	0.7103	1	0.600096	1	0.708595	1	0.0152103	1	0.507171	1	0.467536	1	0.545654	1	0.986372	1	0.232497	1	0.311161	1
276	6	68387772	68420548	32776	16	0.120245	1	0.49791	1	0.317557	1	0.532849	1	0.873978	1	0.0884294	1	0.417727	1	0.0995818	1	0.508568	1	0.990212	1	0.64013	1	0.505118	1	0.98776	1	0.807073	1	0.836702	1	0.43683	1	0.807001	1	0.198556	1	0.222375	1
277	6	68535332	68785029	249697	67	0.914904	1	0.487404	1	0.168996	1	0.480778	1	0.787418	1	0.782457	1	0.176189	1	0.0212734	1	0.528903	1	0.653237	1	0.75924	1	0.500279	1	0.0030463	1	0.582044	1	0.490841	1	0.352757	1	0.824334	1	0.296176	1	0.218762	1
278	6	68860428	68900983	40555	15	0.789861	1	0.25003	1	0.129595	1	0.234546	1	0.824959	1	0.642149	1	0.430998	1	0.0185892	1	0.459911	1	0.609022	1	0.797452	1	0.856297	1	0.00117528	0.895561	0.496625	1	0.513645	1	0.71239	1	0.617357	1	0.529333	1	0.468232	1
279	6	69017899	69193441	175542	21	0.651071	1	0.522034	1	0.292693	1	0.753676	1	0.944639	1	0.541465	1	0.311303	1	0.132865	1	0.522956	1	0.459342	1	0.467162	1	0.756319	1	0.00468886	1	0.498894	1	0.490843	1	0.598895	1	0.954315	1	0.23621	1	0.336797	1
280	6	69452717	69650773	198056	45	0.513024	1	0.490107	1	0.271938	1	0.799127	1	0.912845	1	0.417026	1	0.280767	1	0.122185	1	0.488009	1	0.502212	1	0.534921	1	0.807854	1	0.012148	1	0.451203	1	0.499439	1	0.655442	1	0.962903	1	0.213265	1	0.376686	1
281	6	70210441	70265090	54649	19	0.213673	1	0.880001	1	0.866545	1	0.866842	1	0.506599	1	0.210049	1	0.983734	1	0.495557	1	0.779961	1	0.591232	1	0.583489	1	0.920208	1	0.354086	1	0.463869	1	0.419573	1	0.740411	1	0.674288	1	0.602651	1	0.483108	1
282	6	70355698	70356974	1276	7	0.379309	1	0.634474	1	0.276108	1	0.860311	1	0.534646	1	0.321834	1	0.719701	1	0.292766	1	0.32583	1	0.66655	1	0.98476	1	0.924158	1	0.00215479	1	0.419363	1	0.253052	1	0.682242	1	0.874436	1	0.557681	1	0.40082	1
283	6	70471117	70538758	67641	9	0.859885	1	0.372241	1	0.0217419	1	0.356637	1	0.851895	1	0.695908	1	0.538475	1	0.00471606	1	0.158962	1	0.734958	1	0.725727	1	0.920858	1	0.00240139	1	0.495166	1	0.496337	1	0.769384	1	0.951702	1	0.358702	1	0.440346	1
284	6	70686052	70700249	14197	8	0.172689	1	0.952212	1	0.54384	1	0.52916	1	0.995885	1	0.161727	1	0.988869	1	0.372643	1	0.729832	1	0.315711	1	0.490573	1	0.597279	1	0.971656	1	0.152225	1	0.159692	1	0.33653	1	0.951334	1	0.409028	1	0.171982	1
285	6	74552424	74645435	93011	29	0.610389	1	0.38772	1	0.143457	1	0.501141	1	0.954001	1	0.462665	1	0.357164	1	0.0381961	1	0.374375	1	0.346453	1	0.840272	1	0.501149	1	0.516261	1	0.733082	1	0.964684	1	0.459634	1	0.723318	1	0.583909	1	0.252565	1
286	6	74899205	74998745	99540	16	0.885681	1	0.379809	1	0.165529	1	0.652485	1	0.881345	1	0.734283	1	0.431331	1	0.0634159	1	0.472256	1	0.865859	1	0.775642	1	0.91567	1	0.48793	1	0.447905	1	0.927119	1	0.936341	1	0.889148	1	0.633107	1	0.278041	1
287	6	75304536	75338698	34162	33	0.819988	1	0.163334	1	0.152044	1	0.735461	1	0.411877	1	0.997179	1	0.015246	1	0.00555898	1	0.70994	1	0.134516	1	0.571585	1	0.775391	1	0.633498	1	0.79924	1	0.892078	1	0.781896	1	0.29755	1	0.755329	1	0.66606	1
288	6	75345457	75345955	498	7	0.875963	1	0.0736463	1	0.909033	1	0.602841	1	0.165041	1	0.879052	1	0.484007	1	0.255044	1	0.465406	1	0.670162	1	0.0137153	1	0.767906	1	0.37578	1	0.80814	1	0.639732	1	0.656515	1	0.690413	1	0.664627	1	0.961118	1
289	6	75438396	75448628	10232	6	0.724894	1	0.710349	1	0.329479	1	0.645935	1	0.560453	1	0.617406	1	0.243762	1	0.151264	1	0.795662	1	0.356763	1	0.245727	1	0.92632	1	0.169377	1	0.517568	1	0.924444	1	0.923132	1	0.786899	1	0.921384	1	0.329112	1
290	6	75938517	76017583	79066	26	0.943051	1	0.390955	1	0.254575	1	0.960228	1	0.445678	1	0.780813	1	0.0852636	1	0.0216416	1	0.821735	1	0.246277	1	0.824713	1	0.883128	1	0.512579	1	0.599303	1	0.860516	1	0.920864	1	0.497338	1	0.637676	1	0.361528	1
291	6	79445527	79447101	1574	5	0.699636	1	0.591289	1	0.0156171	1	0.863772	1	0.389725	1	0.569806	1	0.0491328	1	0.00243874	1	0.373282	1	0.102671	1	0.708483	1	0.880649	1	0.369091	1	0.166493	1	0.291546	1	0.899738	1	0.617413	1	0.209924	1	0.152286	1
292	6	82601443	82602661	1218	9	0.143936	1	0.445605	1	0.253405	1	0.353078	1	0.086115	1	0.142272	1	0.95986	1	0.975879	1	0.103311	1	0.648712	1	0.894832	1	0.675223	1	0.557517	1	0.716561	1	0.844381	1	0.601475	1	0.811289	1	0.085838	1	0.191119	1
293	6	93784886	93785383	497	3	0.496409	1	0.862729	1	0.274703	1	0.47404	1	0.265596	1	0.571327	1	0.421019	1	0.875452	1	0.207776	1	0.481898	1	0.198544	1	0.213967	1	0.0673285	1	0.133424	1	0.134824	1	0.0734189	1	0.0342147	1	0.587162	1	0.59194	1
294	6	97429680	97475425	45745	19	0.297493	1	0.359994	1	0.381537	1	0.744998	1	0.846392	1	0.221322	1	0.503785	1	0.127656	1	0.685637	1	0.586095	1	0.340023	1	0.766932	1	0.298413	1	0.409592	1	0.642376	1	0.639774	1	0.238258	1	0.45281	1	0.19121	1
295	6	98496702	98523715	27013	7	0.199414	1	0.129263	1	0.801475	1	0.619411	1	0.55062	1	0.238928	1	0.208068	1	0.535035	1	0.872391	1	0.231717	1	0.61485	1	0.904347	1	0.32431	1	0.815455	1	0.900811	1	0.870121	1	0.207441	1	0.344741	1	0.731981	1
296	6	101279285	101286899	7614	6	0.399695	1	0.986432	1	0.457419	1	0.584948	1	0.696594	1	0.536706	1	0.568423	1	0.19824	1	0.832633	1	0.397609	1	0.60872	1	0.649657	1	0.789829	1	0.903449	1	0.743238	1	0.558375	1	0.373561	1	0.813282	1	0.662231	1
297	6	102304927	102326421	21494	6	0.506914	1	0.561492	1	0.426356	1	0.160909	1	0.700788	1	0.583232	1	0.915362	1	0.605986	1	0.496527	1	0.402995	1	0.594316	1	0.562553	1	0.81975	1	0.578091	1	0.292688	1	0.720967	1	0.406694	1	0.528472	1	0.521144	1
298	6	103383705	103460909	77204	19	0.601725	1	0.45137	1	0.981748	1	0.213151	1	0.516495	1	0.615553	1	0.758986	1	0.602327	1	0.688467	1	0.705266	1	0.907379	1	0.582314	1	0.0727623	1	0.0620165	1	0.197632	1	0.342257	1	0.96782	1	0.593635	1	0.781286	1
299	6	104527703	104528363	660	2	0.0913661	1	0.263858	1	0.647362	1	0.743894	1	0.577483	1	0.0899074	1	0.0880616	1	0.265939	1	0.98601	1	0.311789	1	0.536716	1	0.838175	1	0.996476	1	0.0274926	1	0.110285	1	0.837645	1	0.921834	1	0.25419	1	0.0656558	1
300	6	106983886	107033569	49683	20	0.0779817	1	0.248323	1	0.990739	1	0.580505	1	0.652967	1	0.0613208	1	0.520968	1	0.766038	1	0.812944	1	0.961063	1	0.933592	1	0.476392	1	0.599248	1	0.157797	1	0.468135	1	0.324449	1	0.899846	1	0.198023	1	0.0947056	1
301	6	107044360	107080793	36433	6	0.105544	1	0.301051	1	0.782123	1	0.994076	1	0.472826	1	0.0979167	1	0.525747	1	0.688502	1	0.569695	1	0.676676	1	0.378104	1	0.274076	1	0.753348	1	0.5237	1	0.958881	1	0.22866	1	0.706805	1	0.231986	1	0.03264	1
302	6	107165345	107215744	50399	14	0.0478123	1	0.134371	1	0.89702	1	0.624769	1	0.602603	1	0.036532	1	0.418661	1	0.780717	1	0.720426	1	0.88346	1	0.862398	1	0.635478	1	0.737046	1	0.11036	1	0.425342	1	0.458443	1	0.960892	1	0.179288	1	0.142712	1
303	6	110118673	110222644	103971	35	0.653652	1	0.164037	1	0.641125	1	0.484247	1	0.902752	1	0.603279	1	0.234101	1	0.691607	1	0.833941	1	0.475826	1	0.689269	1	0.4261	1	0.591797	1	0.842514	1	0.559367	1	0.475196	1	0.777429	1	0.35063	1	0.248606	1
304	6	116198049	116199740	1691	2	0.842951	1	0.947246	1	0.193699	1	0.540482	1	0.771713	1	0.999967	1	0.797129	1	0.463787	1	0.355843	1	0.576135	1	0.759026	1	0.692596	1	0.424902	1	0.0128484	1	0.0165961	1	0.83885	1	0.584817	1	0.777941	1	0.571555	1
305	6	126749487	126750695	1208	6	0.138103	1	0.419494	1	0.196913	1	0.202271	1	0.160138	1	0.126994	1	0.870277	1	0.768624	1	0.121312	1	0.944482	1	0.412828	1	0.238604	1	0.119037	1	0.0862068	1	0.0287528	1	0.463105	1	0.0522307	1	0.288171	1	0.890652	1
306	6	128202481	128204309	1828	5	0.224898	1	0.172839	1	0.331755	1	0.495941	1	0.943329	1	0.203467	1	0.11882	1	0.332462	1	0.533038	1	0.845693	1	0.741333	1	0.0471499	1	0.592637	1	0.282865	1	0.158615	1	0.0668832	1	0.815255	1	0.576101	1	0.88456	1
307	6	128595431	128596253	822	3	0.16324	1	0.498524	1	0.952499	1	0.415211	1	0.486847	1	0.160259	1	0.273815	1	0.524603	1	0.732536	1	0.509929	1	0.859834	1	0.0716479	1	0.269408	1	0.214447	1	0.224449	1	0.0952956	1	0.801598	1	0.575879	1	0.683891	1
308	6	128729176	128769001	39825	28	0.965604	1	0.38212	1	0.183748	1	0.857122	1	0.111069	1	0.925437	1	0.827046	1	0.966263	1	0.0907901	1	0.719135	1	0.324308	1	0.974138	1	0.39578	1	0.761879	1	0.83138	1	0.964129	1	0.989312	1	0.865625	1	0.835259	1
309	6	130065363	130316515	251152	113	0.538867	1	0.3266	1	0.858411	1	0.202913	1	0.10441	1	0.479024	1	0.857658	1	0.457631	1	0.315344	1	0.431982	1	0.687554	1	0.651546	1	0.0948143	1	0.402463	1	0.44434	1	0.476246	1	0.862189	1	0.435498	1	0.526714	1
310	6	130707413	130787067	79654	17	0.933764	1	0.612748	1	0.554567	1	0.224973	1	0.400315	1	0.97489	1	0.969281	1	0.286566	1	0.914244	1	0.948434	1	0.643812	1	0.707807	1	0.0699208	1	0.29273	1	0.535346	1	0.553751	1	0.772266	1	0.561129	1	0.536207	1
311	6	137984036	137984036	0	1	0.00220219	1	0.438987	1	0.45934	1	0.608183	1	0.224841	1	0.00249228	1	0.422528	1	0.901621	1	0.254706	1	0.825806	1	0.237798	1	0.349271	1	0.821402	1	0.543419	1	0.429977	1	0.20831	1	0.913879	1	0.65139	1	0.240198	1
312	6	138231553	138237439	5886	11	0.0199503	1	0.97206	1	0.570894	1	0.617528	1	0.160771	1	0.017231	1	0.392987	1	0.623506	1	0.245341	1	0.979625	1	0.326281	1	0.134882	1	0.533915	1	0.806949	1	0.877383	1	0.0862243	1	0.630085	1	0.944315	1	0.211441	1
313	6	138345026	138345242	216	3	0.00471823	1	0.95415	1	0.851834	1	0.812908	1	0.22792	1	0.00352671	1	0.325551	1	0.486088	1	0.40618	1	0.976773	1	0.155705	1	0.260153	1	0.401161	1	0.784351	1	0.910455	1	0.198527	1	0.66656	1	0.84344	1	0.171276	1
314	6	139364857	139412174	47317	19	0.968952	1	0.798683	1	0.439763	1	0.865213	1	0.282237	1	0.93426	1	0.857556	1	0.966756	1	0.294118	1	0.640165	1	0.837647	1	0.762457	1	0.286988	1	0.60869	1	0.294762	1	0.541139	1	0.0643215	1	0.0385795	1	0.205064	1
315	6	139788838	139789925	1087	7	0.640851	1	0.932224	1	0.788791	1	0.265433	1	0.531782	1	0.517008	1	0.846232	1	0.691487	1	0.605771	1	0.324237	1	0.157246	1	0.405815	1	0.140818	1	0.904061	1	0.616279	1	0.296574	1	0.275123	1	0.599325	1	0.597496	1
316	6	139864605	139882163	17558	9	0.236028	1	0.607423	1	0.298215	1	0.322864	1	0.804734	1	0.204754	1	0.111616	1	0.187976	1	0.465723	1	0.987444	1	0.679585	1	0.475165	1	0.268036	1	0.461096	1	0.164684	1	0.671444	1	0.701507	1	0.960321	1	0.258349	1
317	6	139939182	139950758	11576	9	0.0282056	1	0.507763	1	0.924913	1	0.260309	1	0.966968	1	0.030263	1	0.581127	1	0.778946	1	0.963243	1	0.935341	1	0.950791	1	0.501037	1	0.434509	1	0.407164	1	0.261055	1	0.296187	1	0.806909	1	0.792028	1	0.277099	1
318	6	140731823	140757346	25523	9	0.09164	1	0.224469	1	0.501587	1	0.160903	1	0.795234	1	0.095273	1	0.934913	1	0.316303	1	0.801184	1	0.67404	1	0.431688	1	0.422709	1	0.579912	1	0.371139	1	0.307936	1	0.245163	1	0.603677	1	0.877642	1	0.135529	1
319	6	142719701	142721973	2272	9	0.53933	1	0.522301	1	0.0776302	1	0.985034	1	0.388206	1	0.549911	1	0.756053	1	0.268288	1	0.12744	1	0.41777	1	0.660483	1	0.412472	1	0.375033	1	0.90755	1	0.475621	1	0.270268	1	0.356828	1	0.983041	1	0.402355	1
320	6	142768112	142806140	38028	29	0.736813	1	0.299089	1	0.025447	1	0.235324	1	0.132814	1	0.714224	1	0.971414	1	0.161795	1	0.030521	1	0.192344	1	0.352823	1	0.362429	1	0.827652	1	0.83432	1	0.946697	1	0.30599	1	0.325776	1	0.853257	1	0.450243	1
321	6	143197769	143206183	8414	12	0.801929	1	0.744257	1	0.0773234	1	0.426067	1	0.0942565	1	0.749256	1	0.436217	1	0.598501	1	0.0457164	1	0.514188	1	0.742375	1	0.801548	1	0.644209	1	0.900253	1	0.821513	1	0.810287	1	0.218246	1	0.760167	1	0.805178	1
322	6	143508240	143525815	17575	8	0.633667	1	0.201408	1	0.0200183	1	0.847789	1	0.14138	1	0.514423	1	0.995678	1	0.160824	1	0.0270598	1	0.909189	1	0.0286266	1	0.757125	1	0.202553	1	0.652828	1	0.907996	1	0.741959	1	0.856641	1	0.922725	1	0.0989255	1
323	6	143640052	143657471	17419	8	0.556698	1	0.855994	1	0.64604	1	0.206263	1	0.696633	1	0.509778	1	0.596773	1	0.968242	1	0.605479	1	0.360536	1	0.857039	1	0.392236	1	0.641341	1	0.376885	1	0.218589	1	0.536045	1	0.33457	1	0.559458	1	0.368188	1
324	6	145108944	145120036	11092	15	0.746066	1	0.457002	1	0.0782871	1	0.397368	1	0.20066	1	0.788642	1	0.956781	1	0.48155	1	0.0833858	1	0.710969	1	0.922247	1	0.51084	1	0.137052	1	0.784857	1	0.745612	1	0.519763	1	0.35111	1	0.410529	1	0.886007	1
325	6	145308959	145315910	6951	3	0.453879	1	0.951585	1	0.134619	1	0.844385	1	0.545945	1	0.523859	1	0.592958	1	0.250389	1	0.236663	1	0.711045	1	0.79261	1	0.663524	1	0.0808116	1	0.866631	1	0.82829	1	0.673519	1	0.561186	1	0.245011	1	0.870809	1
326	7	5363956	5499501	135545	21	0.494869	1	0.956164	1	0.578762	1	0.500149	1	0.52507	1	0.427478	1	0.041669	1	0.792555	1	0.500434	1	0.357525	1	0.946324	1	0.679924	1	0.854643	1	0.955977	1	0.869538	1	0.689348	1	0.126666	1	0.295456	1	0.537731	1
327	7	6274816	6275328	512	4	0.650233	1	0.622096	1	0.820764	1	0.0802277	1	0.0529767	1	0.603434	1	0.00654219	1	0.306169	1	0.23889	1	0.725443	1	0.056987	1	0.15635	1	0.501652	1	0.994202	1	0.845598	1	0.125966	1	0.421006	1	0.563029	1	0.778663	1
328	7	9155987	10622466	1466479	32	0.525177	1	0.201171	1	0.566682	1	0.083855	1	0.957149	1	0.496581	1	0.782555	1	0.454141	1	0.758718	1	0.452338	1	0.742869	1	0.322705	1	0.144697	1	0.737702	1	0.93069	1	0.278487	1	0.835282	1	0.841526	1	0.602456	1
329	7	10962599	10978345	15746	36	0.90322	1	0.752157	1	0.888938	1	0.0668535	1	0.176239	1	0.95585	1	0.51255	1	0.257915	1	0.398569	1	0.304942	1	0.785639	1	0.259346	1	0.0897375	1	0.795441	1	0.732582	1	0.242646	1	0.660088	1	0.742959	1	0.843968	1
330	7	12198129	12258765	60636	14	0.661324	1	0.490961	1	0.297896	1	0.135052	1	0.898821	1	0.653775	1	0.264646	1	0.336709	1	0.486856	1	0.879664	1	0.739371	1	0.239462	1	0.0367866	1	0.714153	1	0.874457	1	0.170375	1	0.92469	1	0.359468	1	0.996388	1
331	7	12671417	12671825	408	6	0.638215	1	0.927412	1	0.656367	1	0.0965567	1	0.803618	1	0.657646	1	0.841536	1	0.688024	1	0.887958	1	0.786854	1	0.228263	1	0.822517	1	0.213249	1	0.525984	1	0.417178	1	0.625141	1	0.754811	1	0.48217	1	0.42475	1
332	7	12712933	12770476	57543	23	0.882031	1	0.893031	1	0.615051	1	0.0420529	1	0.552886	1	0.886911	1	0.964594	1	0.434803	1	0.979897	1	0.528867	1	0.533843	1	0.583676	1	0.103367	1	0.723856	1	0.705837	1	0.465149	1	0.535335	1	0.570251	1	0.371782	1
333	7	16481510	16489413	7903	14	0.463123	1	0.477667	1	0.355718	1	0.254271	1	0.510562	1	0.487629	1	0.19954	1	0.563157	1	0.351596	1	0.5795	1	0.38263	1	0.295881	1	0.579163	1	0.775165	1	0.918429	1	0.257583	1	0.367043	1	0.719234	1	0.397555	1
334	7	20658198	24083399	3425201	25	0.902828	1	0.224801	1	0.779232	1	0.974789	1	0.683643	1	0.965576	1	0.175727	1	0.91277	1	0.698266	1	0.13802	1	0.466175	1	0.455995	1	0.666654	1	0.455685	1	0.528976	1	0.508826	1	0.367117	1	0.144427	1	0.489197	1
335	7	27627143	27736250	109107	13	0.932222	1	0.441038	1	0.66159	1	0.269479	1	0.470474	1	0.968805	1	0.251998	1	0.811812	1	0.514928	1	0.993298	1	0.0685284	1	0.991934	1	0.290133	1	0.705941	1	0.876255	1	0.959232	1	0.255987	1	0.50817	1	0.259852	1
336	7	31017542	31018654	1112	15	0.232536	1	0.363624	1	0.722962	1	0.852698	1	0.721839	1	0.242449	1	0.0483604	1	0.731482	1	0.713222	1	0.426815	1	0.530485	1	0.661736	1	0.480906	1	0.60156	1	0.911638	1	0.59905	1	0.991115	1	0.391014	1	0.671266	1
337	7	32532002	32694597	162595	16	0.870387	1	0.406923	1	0.700268	1	0.670715	1	0.744588	1	0.815099	1	0.958919	1	0.558653	1	0.70021	1	0.465243	1	0.391059	1	0.651732	1	0.299996	1	0.568872	1	0.660199	1	0.540989	1	0.957286	1	0.460587	1	0.441379	1
338	7	35461546	35461901	355	5	0.398219	1	0.827771	1	0.305854	1	0.46918	1	0.51536	1	0.371158	1	0.636821	1	0.426979	1	0.341137	1	0.786053	1	0.0566836	1	0.383218	1	0.554981	1	0.674192	1	0.935713	1	0.324667	1	0.347137	1	0.467004	1	0.540239	1
339	7	35802070	35807318	5248	12	0.550951	1	0.838135	1	0.453385	1	0.866321	1	0.631899	1	0.523423	1	0.409794	1	0.52502	1	0.496419	1	0.942554	1	0.0548559	1	0.187019	1	0.87662	1	0.272398	1	0.613118	1	0.187456	1	0.811652	1	0.965686	1	0.472901	1
340	7	38961668	38997301	35633	20	0.76455	1	0.0142251	1	0.824029	1	0.139703	1	0.78928	1	0.858399	1	0.846416	1	0.6647	1	0.786226	1	0.445858	1	0.143776	1	0.676376	1	0.887483	1	0.737345	1	0.636756	1	0.736927	1	0.426382	1	0.977241	1	0.828839	1
341	7	39096069	46665068	7568999	70	0.60208	1	0.23671	1	0.488877	1	0.244902	1	0.361475	1	0.7186	1	0.440562	1	0.656206	1	0.358851	1	0.645338	1	0.377991	1	0.450126	1	0.470046	1	0.466312	1	0.683258	1	0.470896	1	0.480562	1	0.83963	1	0.76303	1
342	7	48319662	48548430	228768	41	0.589236	1	0.250625	1	0.996428	1	0.476058	1	0.34386	1	0.623599	1	0.0935975	1	0.535337	1	0.592473	1	0.604408	1	0.921827	1	0.948103	1	0.833029	1	0.66958	1	0.749667	1	0.978117	1	0.428835	1	0.640593	1	0.208508	1
343	7	50914593	50919381	4788	12	0.69771	1	0.676989	1	0.931676	1	0.448538	1	0.522978	1	0.766944	1	0.24933	1	0.834399	1	0.684467	1	0.333242	1	0.907251	1	0.763774	1	0.703616	1	0.249684	1	0.391432	1	0.92549	1	0.135664	1	0.343197	1	0.154213	1
344	7	54636276	54680897	44621	11	0.532347	1	0.84666	1	0.53044	1	0.87006	1	0.135911	1	0.609711	1	0.0286504	1	0.0646381	1	0.643803	1	0.730307	1	0.969224	1	0.982191	1	0.88064	1	0.824309	1	0.908849	1	0.986202	1	0.563527	1	0.33153	1	0.0578613	1
345	7	54813251	54974058	160807	21	0.241121	1	0.548981	1	0.340791	1	0.800572	1	0.196419	1	0.28652	1	0.00740331	1	0.0306949	1	0.86926	1	0.650067	1	0.827054	1	0.794756	1	0.932468	1	0.792374	1	0.721613	1	0.695066	1	0.661714	1	0.348447	1	0.0783151	1
346	7	54976185	55008187	32002	13	0.957753	1	0.756623	1	0.444916	1	0.366305	1	0.296528	1	0.946085	1	0.0897053	1	0.0861707	1	0.89898	1	0.1963	1	0.448289	1	0.930251	1	0.98599	1	0.697325	1	0.856803	1	0.968728	1	0.770387	1	0.535569	1	0.138205	1
347	7	55012164	55036726	24562	3	0.495332	1	0.784702	1	0.29001	1	0.588863	1	0.388716	1	0.591377	1	0.0250525	1	0.0434345	1	0.885271	1	0.869403	1	0.44682	1	0.996393	1	0.878876	1	0.991524	1	0.963084	1	0.992897	1	0.897677	1	0.357698	1	0.0834809	1
348	7	55052585	55194801	142216	47	0.778376	1	0.686639	1	0.404884	1	0.55566	1	0.223953	1	0.87745	1	0.0921568	1	0.0639899	1	0.849343	1	0.294371	1	0.672998	1	0.875287	1	0.997293	1	0.674311	1	0.722479	1	0.945355	1	0.779531	1	0.42982	1	0.0734688	1
349	7	55454535	55702761	248226	42	0.541267	1	0.693893	1	0.310683	1	0.475562	1	0.228317	1	0.642674	1	0.0346383	1	0.0336279	1	0.93912	1	0.479834	1	0.71964	1	0.944781	1	0.829417	1	0.704843	1	0.703149	1	0.973108	1	0.966943	1	0.375264	1	0.0467558	1
350	7	60618457	60731880	113423	23	0.873736	1	0.461979	1	0.373276	1	0.629282	1	0.584853	1	0.943842	1	0.816669	1	0.426544	1	0.401791	1	0.212924	1	0.342155	1	0.74018	1	0.143392	1	0.618719	1	0.755682	1	0.781544	1	0.286576	1	0.64238	1	0.555455	1
351	7	78961795	78971649	9854	10	0.323146	1	0.091424	1	0.941246	1	0.347828	1	0.673843	1	0.334684	1	0.163522	1	0.60367	1	0.845489	1	0.0568666	1	0.413465	1	0.650154	1	0.143205	1	0.299795	1	0.464967	1	0.482493	1	0.965505	1	0.761973	1	0.693726	1
352	7	79385029	79385270	241	3	0.720064	1	0.968367	1	0.761274	1	0.448598	1	0.909383	1	0.687253	1	0.505166	1	0.65717	1	0.905869	1	0.249799	1	0.994752	1	0.942147	1	0.328099	1	0.382337	1	0.689666	1	0.978512	1	0.423497	1	0.937982	1	0.415503	1
353	7	83036560	83045516	8956	6	0.598044	1	0.93874	1	0.93418	1	0.983606	1	0.128182	1	0.665248	1	0.311767	1	0.116081	1	0.425804	1	0.668675	1	0.130083	1	0.550501	1	0.343623	1	0.306604	1	0.605646	1	0.607363	1	0.890934	1	0.312316	1	0.583847	1
354	7	86827857	86840870	13013	32	0.453312	1	0.115631	1	0.87269	1	0.936685	1	0.855476	1	0.479669	1	0.501483	1	0.669669	1	0.841333	1	0.672473	1	0.0314577	1	0.454789	1	0.46399	1	0.902581	1	0.617408	1	0.335188	1	0.173586	1	0.272732	1	0.134614	1
355	7	109754987	109760894	5907	3	0.289925	1	0.0100783	1	0.868668	1	0.260968	1	0.948865	1	0.297136	1	0.61819	1	0.993329	1	0.917807	1	0.943126	1	0.380947	1	0.533913	1	0.630528	1	0.0549976	1	0.105856	1	0.799157	1	0.681102	1	0.903445	1	0.268911	1
356	7	109794774	109817326	22552	8	0.487873	1	0.00906496	1	0.717509	1	0.473508	1	0.829046	1	0.503417	1	0.959196	1	0.914509	1	0.756278	1	0.907728	1	0.553172	1	0.473396	1	0.430038	1	0.0937103	1	0.158585	1	0.680061	1	0.581086	1	0.989417	1	0.228121	1
357	7	109855744	109858484	2740	7	0.333486	1	0.0108434	1	0.665164	1	0.350695	1	0.733392	1	0.328352	1	0.861828	1	0.882893	1	0.672765	1	0.903056	1	0.370799	1	0.598966	1	0.539961	1	0.109004	1	0.168992	1	0.832679	1	0.736094	1	0.871467	1	0.343753	1
358	7	110073824	110096332	22508	20	0.733179	1	0.0159547	1	0.661114	1	0.931583	1	0.936985	1	0.720868	1	0.706991	1	0.737446	1	0.776291	1	0.8198	1	0.73101	1	0.262125	1	0.341687	1	0.0948986	1	0.0980865	1	0.424326	1	0.740533	1	0.793748	1	0.177206	1
359	7	110142788	110201227	58439	14	0.361657	1	0.0127132	1	0.745749	1	0.470741	1	0.780629	1	0.359002	1	0.889507	1	0.964271	1	0.742817	1	0.907706	1	0.540078	1	0.25108	1	0.616113	1	0.0634269	1	0.0903631	1	0.414118	1	0.652637	1	0.813457	1	0.233883	1
360	7	110370159	110491407	121248	30	0.433474	1	0.0167923	1	0.604357	1	0.635294	1	0.865817	1	0.428298	1	0.879204	1	0.674697	1	0.704705	1	0.901839	1	0.685205	1	0.49543	1	0.465967	1	0.112025	1	0.17602	1	0.695321	1	0.718349	1	0.898449	1	0.321847	1
361	7	111067015	111077749	10734	10	0.295194	1	0.0191267	1	0.700749	1	0.509919	1	0.850467	1	0.29516	1	0.868791	1	0.819025	1	0.753095	1	0.948528	1	0.571432	1	0.301687	1	0.575767	1	0.0793836	1	0.115324	1	0.471029	1	0.752892	1	0.811018	1	0.271764	1
362	7	111120174	111154197	34023	18	0.377144	1	0.0137446	1	0.626779	1	0.709572	1	0.638163	1	0.386375	1	0.877966	1	0.962913	1	0.593083	1	0.994566	1	0.630767	1	0.348787	1	0.606633	1	0.0682079	1	0.117486	1	0.538211	1	0.553905	1	0.890451	1	0.25636	1
363	7	111428102	111428284	182	3	0.777149	1	0.019866	1	0.425025	1	0.950775	1	0.673786	1	0.759434	1	0.569881	1	0.599655	1	0.485568	1	0.532052	1	0.890187	1	0.277138	1	0.41796	1	0.184903	1	0.172748	1	0.400535	1	0.961867	1	0.605556	1	0.150789	1
364	7	111485184	111501846	16662	20	0.429076	1	0.0112902	1	0.478036	1	0.527078	1	0.713156	1	0.442721	1	0.895391	1	0.742144	1	0.54593	1	0.923949	1	0.88928	1	0.473346	1	0.377522	1	0.0897189	1	0.118308	1	0.710949	1	0.661859	1	0.989891	1	0.190302	1
365	7	111647983	111683670	35687	15	0.611579	1	0.00925216	1	0.498506	1	0.775528	1	0.635647	1	0.60517	1	0.81528	1	0.778422	1	0.511943	1	0.651023	1	0.774343	1	0.221636	1	0.448938	1	0.12264	1	0.129222	1	0.342948	1	0.801982	1	0.655802	1	0.198165	1
366	7	112352842	112433900	81058	21	0.412688	1	0.170986	1	0.504429	1	0.941337	1	0.658641	1	0.410855	1	0.776436	1	0.734726	1	0.533624	1	0.657879	1	0.545023	1	0.118182	1	0.489477	1	0.189514	1	0.214438	1	0.165042	1	0.380454	1	0.276234	1	0.273182	1
367	7	113403102	113539296	136194	13	0.193677	1	0.185825	1	0.757555	1	0.938071	1	0.852818	1	0.207883	1	0.579787	1	0.49478	1	0.927437	1	0.50132	1	0.196048	1	0.0764787	1	0.745377	1	0.044765	1	0.0799487	1	0.138256	1	0.160846	1	0.715075	1	0.688781	1
368	7	115004586	115041563	36977	9	0.283962	1	0.0913712	1	0.765915	1	0.397006	1	0.725122	1	0.297172	1	0.813097	1	0.776134	1	0.700264	1	0.706924	1	0.392732	1	0.37596	1	0.282794	1	0.341531	1	0.540869	1	0.413369	1	0.617041	1	0.549679	1	0.842099	1
369	7	115270034	115271579	1545	5	0.299456	1	0.10121	1	0.619753	1	0.691748	1	0.377413	1	0.291519	1	0.497888	1	0.910333	1	0.413414	1	0.590316	1	0.775353	1	0.847309	1	0.249828	1	0.551896	1	0.98103	1	0.831978	1	0.573045	1	0.757448	1	0.893717	1
370	7	115300845	115399384	98539	22	0.446906	1	0.058602	1	0.402516	1	0.467646	1	0.576065	1	0.526007	1	0.884612	1	0.468712	1	0.399817	1	0.953228	1	0.512584	1	0.660768	1	0.222319	1	0.393584	1	0.671619	1	0.712656	1	0.18298	1	0.643134	1	0.96896	1
371	7	115400336	115401546	1210	6	0.751271	1	0.0110225	1	0.593369	1	0.294118	1	0.981465	1	0.637482	1	0.487043	1	0.418349	1	0.723518	1	0.771869	1	0.871842	1	0.885548	1	0.195747	1	0.580007	1	0.864918	1	0.910758	1	0.134508	1	0.39827	1	0.995131	1
372	7	115511458	115540995	29537	9	0.388522	1	0.0875435	1	0.572665	1	0.486413	1	0.613923	1	0.424517	1	0.621776	1	0.698821	1	0.520794	1	0.712408	1	0.675807	1	0.740993	1	0.190857	1	0.419215	1	0.692442	1	0.794323	1	0.372443	1	0.910419	1	0.934604	1
373	7	115566346	115604872	38526	12	0.262479	1	0.228589	1	0.639823	1	0.474949	1	0.696839	1	0.272108	1	0.889038	1	0.757424	1	0.612371	1	0.726602	1	0.281217	1	0.51411	1	0.283263	1	0.403012	1	0.563787	1	0.56921	1	0.589792	1	0.723255	1	0.861182	1
374	7	115735206	115755917	20711	5	0.291555	1	0.0787912	1	0.538015	1	0.425962	1	0.749036	1	0.342005	1	0.839727	1	0.496491	1	0.563434	1	0.887928	1	0.616232	1	0.58195	1	0.108028	1	0.369615	1	0.714331	1	0.609782	1	0.357685	1	0.712056	1	0.872566	1
375	7	116229414	116230142	728	2	0.322653	1	0.103493	1	0.545713	1	0.328473	1	0.539989	1	0.358386	1	0.497804	1	0.65941	1	0.465716	1	0.769767	1	0.944188	1	0.480038	1	0.128086	1	0.31891	1	0.732739	1	0.489246	1	0.403495	1	0.589893	1	0.889219	1
376	7	116559867	116581880	22013	9	0.266908	1	0.0457133	1	0.818948	1	0.356853	1	0.506575	1	0.270523	1	0.403173	1	0.574063	1	0.790078	1	0.995625	1	0.635592	1	0.762367	1	0.275054	1	0.207644	1	0.388308	1	0.574286	1	0.922854	1	0.588376	1	0.564151	1
377	7	117633683	117650114	16431	5	0.383048	1	0.0671454	1	0.839141	1	0.592671	1	0.407627	1	0.392695	1	0.44463	1	0.542217	1	0.702204	1	0.868901	1	0.571268	1	0.815738	1	0.215774	1	0.11227	1	0.293827	1	0.588186	1	0.977537	1	0.592876	1	0.854591	1
378	7	126424614	126433784	9170	7	0.153914	1	0.183861	1	0.100234	1	0.176758	1	0.0797827	1	0.20937	1	0.505648	1	0.351801	1	0.0509596	1	0.0394337	1	0.572109	1	0.705912	1	0.511439	1	0.533622	1	0.718082	1	0.606617	1	0.607798	1	0.763419	1	0.238649	1
379	7	126590644	126592641	1997	7	0.127065	1	0.219714	1	0.0213176	1	0.136019	1	0.0157109	1	0.174642	1	0.587354	1	0.222277	1	0.00627248	1	0.100611	1	0.846023	1	0.914582	1	0.530194	1	0.300354	1	0.4753	1	0.756794	1	0.452778	1	0.839299	1	0.325192	1
380	7	130213756	130215357	1601	3	0.770125	1	0.0713046	1	0.583956	1	0.0638502	1	0.284206	1	0.770043	1	0.411356	1	0.82863	1	0.345747	1	0.351015	1	0.624328	1	0.206146	1	0.684052	1	0.708912	1	0.782048	1	0.138033	1	0.0197625	1	0.165702	1	0.532958	1
381	7	133164530	133182625	18095	5	0.508447	1	0.925253	1	0.765341	1	0.308765	1	0.388566	1	0.394622	1	0.963897	1	0.560645	1	0.720633	1	0.327482	1	0.53689	1	0.511598	1	0.822344	1	0.851358	1	0.965063	1	0.488107	1	0.0606569	1	0.637995	1	0.507201	1
382	8	28371247	28479196	107949	43	0.287464	1	0.220818	1	0.607945	1	0.971447	1	0.878226	1	0.325363	1	0.0317373	1	0.568809	1	0.834725	1	0.142021	1	0.6843	1	0.400388	1	0.773909	1	0.347302	1	0.749763	1	0.313133	1	0.600313	1	0.16298	1	0.971617	1
383	8	28519836	28531880	12044	14	0.366268	1	0.703666	1	0.851487	1	0.826565	1	0.349616	1	0.401179	1	0.0756146	1	0.506697	1	0.665716	1	0.159798	1	0.768778	1	0.88689	1	0.858098	1	0.335772	1	0.856414	1	0.846368	1	0.214726	1	0.343664	1	0.85605	1
384	8	28608199	28691596	83397	34	0.830509	1	0.231299	1	0.762602	1	0.781769	1	0.848348	1	0.843205	1	0.353855	1	0.776103	1	0.744785	1	0.156412	1	0.401343	1	0.865594	1	0.408907	1	0.0613925	1	0.191331	1	0.601118	1	0.806611	1	0.409621	1	0.540404	1
385	8	28730777	28743469	12692	10	0.910775	1	0.346282	1	0.379831	1	0.722737	1	0.386408	1	0.940133	1	0.0536359	1	0.653808	1	0.327869	1	0.040508	1	0.157968	1	0.468813	1	0.242008	1	0.339864	1	0.716324	1	0.372567	1	0.722345	1	0.113708	1	0.784241	1
386	8	29493904	29531641	37737	6	0.344893	1	0.950792	1	0.677223	1	0.701643	1	0.822367	1	0.338313	1	0.530098	1	0.527305	1	0.718122	1	0.175084	1	0.0669496	1	0.495139	1	0.876362	1	0.0573553	1	0.21646	1	0.672242	1	0.587361	1	0.823923	1	0.506366	1
387	8	30463842	30483664	19822	4	0.5699	1	0.861267	1	0.750997	1	0.322173	1	0.978876	1	0.570535	1	0.611318	1	0.497883	1	0.848306	1	0.0532119	1	0.0744397	1	0.406647	1	0.51083	1	0.034799	1	0.108412	1	0.625719	1	0.752428	1	0.680844	1	0.99008	1
388	8	34256748	34305880	49132	12	0.529045	1	0.880228	1	0.840265	1	0.153028	1	0.887851	1	0.411537	1	0.796128	1	0.785403	1	0.939054	1	0.779265	1	0.117271	1	0.27527	1	0.208801	1	0.254366	1	0.356631	1	0.334349	1	0.340373	1	0.0922082	1	0.569789	1
389	8	50456466	50456470	4	3	0.993919	1	0.926725	1	6.20121e-05	0.0473772	0.232809	1	0.782557	1	0.846048	1	0.0991667	1	6.27352e-05	0.0479297	0.0391952	1	0.185479	1	0.336855	1	0.849861	1	0.160395	1	0.176802	1	0.159088	1	0.855839	1	0.189097	1	0.944795	1	0.727262	1
390	8	52224120	52273067	48947	10	0.956299	1	0.332627	1	0.00931994	1	0.469503	1	0.157335	1	0.861718	1	0.851671	1	0.0725625	1	0.0196504	1	0.855235	1	0.256585	1	0.385149	1	0.548628	1	0.7327	1	0.791151	1	0.365699	1	0.505037	1	0.995022	1	0.709491	1
391	8	52394663	52466264	71601	14	0.521103	1	0.693067	1	0.235997	1	0.375562	1	0.737859	1	0.596252	1	0.0667337	1	0.0568583	1	0.604703	1	0.398941	1	0.00674054	1	0.530984	1	0.736094	1	0.943403	1	0.949309	1	0.493998	1	0.397103	1	0.770707	1	0.978001	1
392	8	52870886	52923754	52868	16	0.226198	1	0.834711	1	0.290362	1	0.981726	1	0.160852	1	0.207759	1	0.194483	1	0.940256	1	0.160677	1	0.847896	1	0.0180669	1	0.848135	1	0.699422	1	0.655029	1	0.919478	1	0.859051	1	0.404966	1	0.568528	1	0.36362	1
393	8	53127775	53284994	157219	33	0.464603	1	0.868253	1	0.00143717	1	0.319633	1	0.0116326	1	0.390246	1	0.775198	1	0.175514	1	0.000842777	0.643882	0.435432	1	0.182386	1	0.601322	1	0.979675	1	0.905375	1	0.917467	1	0.534345	1	0.718801	1	0.978538	1	0.991377	1
394	8	55050369	55055813	5444	9	0.991496	1	0.879886	1	0.335921	1	0.919405	1	0.625704	1	0.894456	1	0.25221	1	0.185865	1	0.79915	1	0.900916	1	0.0661033	1	0.283888	1	0.826033	1	0.249747	1	0.1619	1	0.414068	1	0.619533	1	0.505192	1	0.775773	1
395	8	62393103	62420070	26967	13	0.350016	1	0.937607	1	0.0857533	1	0.0685473	1	0.480793	1	0.339163	1	0.388447	1	0.251221	1	0.154901	1	0.454309	1	0.125636	1	0.506058	1	0.779949	1	0.946754	1	0.995092	1	0.456271	1	0.730559	1	0.639021	1	0.863823	1
396	8	76812850	76823496	10646	6	0.527308	1	0.921844	1	0.763358	1	0.810103	1	0.387898	1	0.526244	1	0.417736	1	0.766103	1	0.502208	1	0.49108	1	0.0844359	1	0.531866	1	0.400713	1	0.584984	1	0.821295	1	0.444011	1	0.0634215	1	0.674025	1	0.942517	1
397	8	79438032	79453386	15354	17	0.0141112	1	0.150077	1	0.582414	1	0.573	1	0.367919	1	0.0105104	1	0.457899	1	0.794009	1	0.417082	1	0.329241	1	0.751535	1	0.0629089	1	0.141313	1	0.668141	1	0.938154	1	0.0419306	1	0.724995	1	0.597121	1	0.954081	1
398	8	80087901	80089033	1132	7	0.413819	1	0.298045	1	0.210437	1	0.730021	1	0.887483	1	0.510278	1	0.117893	1	0.0758596	1	0.518678	1	0.329287	1	0.765051	1	0.58365	1	0.0344478	1	0.0261487	1	0.037757	1	0.968954	1	0.732125	1	0.992714	1	0.229986	1
399	8	80089624	80092244	2620	6	0.460927	1	0.735348	1	0.368301	1	0.822033	1	0.637258	1	0.418821	1	0.943937	1	0.538934	1	0.429166	1	0.751278	1	0.480858	1	0.101824	1	0.253937	1	0.00603736	1	0.0211373	1	0.240887	1	0.985697	1	0.552658	1	0.466791	1
400	8	80263027	80263410	383	3	0.0561722	1	0.577469	1	0.704868	1	0.468512	1	0.971863	1	0.0615141	1	0.373252	1	0.716136	1	0.818881	1	0.364021	1	0.828035	1	0.950481	1	0.456021	1	0.307735	1	0.263027	1	0.698422	1	0.711237	1	0.772911	1	0.154934	1
401	8	80806213	80834051	27838	15	0.0543472	1	0.896003	1	0.125097	1	0.0354376	1	0.0420804	1	0.0533805	1	0.0616057	1	0.833495	1	0.042726	1	0.593426	1	0.814394	1	0.34264	1	0.604642	1	0.219805	1	0.138593	1	0.519508	1	0.958597	1	0.23204	1	0.293993	1
402	8	86886841	86904371	17530	11	0.817582	1	0.101707	1	0.730325	1	0.690402	1	0.507939	1	0.670232	1	0.628281	1	0.779703	1	0.551369	1	0.379065	1	0.727355	1	0.136197	1	0.352826	1	0.928587	1	0.949115	1	0.10022	1	0.414305	1	0.833849	1	0.226853	1
403	8	98500773	98502741	1968	6	0.303372	1	0.367934	1	0.468646	1	0.746089	1	0.432063	1	0.264874	1	0.0484189	1	0.923428	1	0.377865	1	0.878748	1	0.606996	1	0.808792	1	0.387973	1	0.814757	1	0.514564	1	0.929238	1	0.976805	1	0.256292	1	0.751524	1
404	8	99022008	99032230	10222	9	0.389145	1	0.985872	1	0.952039	1	0.660469	1	0.849348	1	0.334876	1	0.10149	1	0.703802	1	0.929867	1	0.366735	1	0.166134	1	0.891931	1	0.898904	1	0.612017	1	0.547231	1	0.987099	1	0.782755	1	0.163489	1	0.725601	1
405	8	99036252	99037492	1240	6	0.395347	1	0.760368	1	0.649739	1	0.50055	1	0.52829	1	0.354421	1	0.295914	1	0.858852	1	0.547244	1	0.153248	1	0.301361	1	0.664982	1	0.963616	1	0.499024	1	0.479297	1	0.498855	1	0.365347	1	0.126332	1	0.341828	1
406	8	117488656	117647628	158972	46	0.940725	1	0.67546	1	0.257487	1	0.391707	1	0.265447	1	0.931155	1	0.757276	1	0.689085	1	0.200271	1	0.421544	1	0.709899	1	0.941274	1	0.860078	1	0.0307255	1	0.0694607	1	0.575867	1	0.124309	1	0.453844	1	0.248226	1
407	8	124603535	124616409	12874	7	0.656321	1	0.461792	1	0.16568	1	0.120809	1	0.300397	1	0.661445	1	0.36745	1	0.477211	1	0.162872	1	0.562253	1	0.298966	1	0.765269	1	0.526998	1	0.591965	1	0.823973	1	0.789332	1	0.308934	1	0.0678588	1	0.897427	1
408	9	17303897	17358876	54979	15	0.0467047	1	0.0524846	1	0.221983	1	0.840229	1	0.998037	1	0.0353403	1	0.523531	1	0.129621	1	0.475627	1	0.646379	1	0.461511	1	0.315483	1	0.345216	1	0.105576	1	0.239854	1	0.433841	1	0.433995	1	0.478604	1	0.207729	1
409	9	24281885	24282276	391	5	0.719475	1	0.760418	1	0.344922	1	0.649868	1	0.453817	1	0.793241	1	0.0699041	1	0.314555	1	0.312865	1	0.373189	1	0.0691043	1	0.772819	1	0.34434	1	0.0816779	1	0.254336	1	0.987168	1	0.372143	1	0.598437	1	0.551359	1
410	9	35652844	35929172	276328	71	0.592385	1	0.181834	1	0.277826	1	0.572879	1	0.442206	1	0.470327	1	0.188502	1	0.0900438	1	0.87375	1	0.998114	1	0.974638	1	0.495957	1	0.383229	1	0.78777	1	0.666817	1	0.530434	1	0.149246	1	0.912258	1	0.455963	1
411	9	37086445	37086843	398	5	0.761758	1	0.222666	1	0.816086	1	0.808596	1	0.793129	1	0.670468	1	0.56482	1	0.620238	1	0.769075	1	0.12998	1	0.214111	1	0.430538	1	0.702265	1	0.459886	1	0.813111	1	0.424798	1	0.5226	1	0.88482	1	0.925428	1
412	9	38126083	38141452	15369	15	0.697566	1	0.237168	1	0.48134	1	0.324066	1	0.103291	1	0.633988	1	0.681046	1	0.820668	1	0.182918	1	0.352222	1	0.331226	1	0.410223	1	0.106604	1	0.884004	1	0.842961	1	0.392964	1	0.825766	1	0.695037	1	0.172994	1
413	9	38480102	38488311	8209	9	0.915285	1	0.660156	1	0.039241	1	0.438345	1	0.111601	1	0.933416	1	0.819199	1	0.329212	1	0.0355759	1	0.652916	1	0.93644	1	0.350587	1	0.798803	1	0.0832595	1	0.0535233	1	0.61822	1	0.667472	1	0.887977	1	0.328968	1
414	9	39149141	39234634	85493	13	0.653728	1	0.368523	1	0.923405	1	0.923529	1	0.585806	1	0.643704	1	0.656013	1	0.772273	1	0.789065	1	0.185111	1	0.793354	1	0.70428	1	0.546991	1	0.266457	1	0.618907	1	0.783833	1	0.671204	1	0.23543	1	0.682399	1
415	9	48364375	48368373	3998	5	0.827356	1	0.8304	1	0.275467	1	0.983342	1	0.441318	1	0.780344	1	0.126164	1	0.599653	1	0.287219	1	0.706438	1	0.191049	1	0.7729	1	0.236982	1	0.404909	1	0.153128	1	0.962828	1	0.657711	1	0.973475	1	0.483277	1
416	9	49959080	49978944	19864	10	0.133814	1	0.909411	1	0.101453	1	0.244197	1	0.224016	1	0.164512	1	0.685998	1	0.242701	1	0.0953272	1	0.996207	1	0.511824	1	0.833189	1	0.560892	1	0.727024	1	0.90713	1	0.836423	1	0.550236	1	0.0442257	1	0.135605	1
417	9	83521018	83522534	1516	5	0.753886	1	0.590228	1	0.629741	1	0.181975	1	0.538776	1	0.714671	1	0.973215	1	0.790426	1	0.514016	1	0.537884	1	0.655411	1	0.62332	1	0.468783	1	0.652375	1	0.652743	1	0.509209	1	0.940869	1	0.646602	1	0.0741468	1
418	9	88476937	88499227	22290	15	0.93891	1	0.452186	1	0.309002	1	0.658249	1	0.690703	1	0.981707	1	0.0909962	1	0.165209	1	0.719016	1	0.352058	1	0.283198	1	0.212705	1	0.958984	1	0.172289	1	0.314679	1	0.269243	1	0.49621	1	0.0293716	1	0.985095	1
419	9	103355461	103358235	2774	4	0.445098	1	0.914734	1	0.498489	1	0.336307	1	0.869222	1	0.399841	1	0.79391	1	0.510752	1	0.637852	1	0.479857	1	0.8375	1	0.0939539	1	0.647866	1	0.167842	1	0.141729	1	0.146182	1	0.983358	1	0.76473	1	0.791444	1
420	9	113721718	113722368	650	6	0.234893	1	0.751671	1	0.251967	1	0.511052	1	0.524437	1	0.285972	1	0.643781	1	0.381151	1	0.302144	1	0.642822	1	0.801724	1	0.628104	1	0.0546864	1	0.383526	1	0.568344	1	0.694051	1	0.175536	1	0.577229	1	0.498729	1
421	9	114756414	114766671	10257	11	0.835882	1	0.0760202	1	0.858323	1	0.255169	1	0.215779	1	0.806827	1	0.98981	1	0.47814	1	0.542288	1	0.500281	1	0.506153	1	0.911639	1	0.371186	1	0.423888	1	0.197163	1	0.830035	1	0.115622	1	0.866712	1	0.396242	1
422	9	114814094	114815852	1758	8	0.622454	1	0.343245	1	0.609978	1	0.617458	1	0.341778	1	0.521297	1	0.797808	1	0.213849	1	0.809695	1	0.217113	1	0.593988	1	0.198702	1	0.657984	1	0.764634	1	0.759419	1	0.132173	1	0.685086	1	0.925951	1	0.922883	1
423	9	118476311	118491621	15310	19	0.708792	1	0.29644	1	0.206111	1	0.308194	1	0.32873	1	0.755797	1	0.10743	1	0.535808	1	0.192149	1	0.243939	1	0.0904508	1	0.831678	1	0.0438795	1	0.635157	1	0.350819	1	0.630921	1	0.671499	1	0.31646	1	0.953184	1
424	10	7534475	7534653	178	4	0.41214	1	0.521183	1	0.0603234	1	0.642253	1	0.793411	1	0.316127	1	0.278549	1	0.12006	1	0.217171	1	0.518859	1	0.22211	1	0.945118	1	0.958234	1	0.74996	1	0.651388	1	0.847516	1	0.194316	1	0.399701	1	0.717492	1
425	10	9122767	9150853	28086	12	0.844528	1	0.263449	1	0.98545	1	0.303839	1	0.582543	1	0.956404	1	0.746652	1	0.662007	1	0.766269	1	0.792654	1	0.0208883	1	0.717057	1	0.651198	1	0.701685	1	0.475741	1	0.561684	1	0.511603	1	0.936636	1	0.972073	1
426	10	12334301	12334411	110	3	0.450416	1	0.80812	1	0.753187	1	0.103063	1	0.899039	1	0.506269	1	0.56081	1	0.592001	1	0.903316	1	0.555906	1	0.983178	1	0.721281	1	0.857642	1	0.407837	1	0.958438	1	0.703685	1	0.298667	1	0.482947	1	0.695434	1
427	10	15272668	15281790	9122	3	0.611086	1	0.12314	1	0.997879	1	0.607572	1	0.266171	1	0.657124	1	0.373723	1	0.565682	1	0.554711	1	0.955245	1	0.586249	1	0.449196	1	0.918954	1	0.717985	1	0.633281	1	0.488346	1	0.61679	1	0.507206	1	0.189994	1
428	10	15385518	15432971	47453	8	0.188066	1	0.634493	1	0.599153	1	0.8379	1	0.0411573	1	0.215938	1	0.833553	1	0.436308	1	0.151813	1	0.75376	1	0.264439	1	0.834035	1	0.338399	1	0.723229	1	0.793268	1	0.761452	1	0.640634	1	0.648286	1	0.883718	1
429	10	20924226	20938033	13807	10	0.809935	1	0.850084	1	0.815901	1	0.582705	1	0.704029	1	0.859302	1	0.370672	1	0.508106	1	0.712553	1	0.465607	1	0.258479	1	0.310367	1	0.792099	1	0.228491	1	0.606575	1	0.328881	1	0.677655	1	0.822164	1	0.762261	1
430	10	21769739	22093887	324148	86	0.468945	1	0.0260715	1	0.531149	1	0.794473	1	0.529024	1	0.474038	1	0.843952	1	0.391903	1	0.470461	1	0.869482	1	0.640229	1	0.644684	1	0.507074	1	0.185796	1	0.342751	1	0.442136	1	0.778917	1	0.0307442	1	0.691859	1
431	10	24369091	24369167	76	3	0.976114	1	0.24363	1	0.226987	1	0.574689	1	0.918355	1	0.903737	1	0.252829	1	0.161717	1	0.526571	1	0.409923	1	0.0925544	1	0.0368263	1	0.609281	1	0.986754	1	0.925455	1	0.0184431	1	0.877195	1	0.877671	1	0.118059	1
432	10	27471662	27497089	25427	11	0.967889	1	0.428432	1	0.946677	1	0.996859	1	0.750262	1	0.908896	1	0.127937	1	0.525341	1	0.829716	1	0.139926	1	0.275994	1	0.30851	1	0.90393	1	0.296304	1	0.40467	1	0.374142	1	0.378943	1	0.626612	1	0.981967	1
433	10	44430245	44548182	117937	25	0.0695961	1	0.854605	1	0.692523	1	0.654944	1	0.710668	1	0.0861911	1	0.662421	1	0.819366	1	0.676924	1	0.0785182	1	0.652159	1	0.925153	1	0.217551	1	0.977195	1	0.662794	1	0.989562	1	0.0907083	1	0.930358	1	0.162998	1
434	10	53563604	53572451	8847	6	0.208994	1	0.959071	1	0.545159	1	0.833347	1	0.720874	1	0.23489	1	0.613874	1	0.249785	1	0.865096	1	0.196276	1	0.862165	1	0.739927	1	0.473747	1	0.394528	1	0.239824	1	0.961032	1	0.904697	1	0.0415684	1	0.161222	1
435	10	54019992	54044971	24979	6	0.21582	1	0.823181	1	0.533775	1	0.293473	1	0.583782	1	0.207596	1	0.618538	1	0.784119	1	0.515634	1	0.812908	1	0.629635	1	0.9653	1	0.502805	1	0.847163	1	0.666629	1	0.861044	1	0.900707	1	0.0408833	1	0.596053	1
436	10	55530107	55533033	2926	3	0.322686	1	0.850531	1	0.432841	1	0.283568	1	0.600217	1	0.304697	1	0.874667	1	0.617698	1	0.464662	1	0.765545	1	0.561484	1	0.942636	1	0.456442	1	0.859188	1	0.66288	1	0.962897	1	0.779289	1	0.0415115	1	0.954121	1
437	10	61300867	61301038	171	3	0.723228	1	0.716529	1	0.226078	1	0.00550704	1	0.439119	1	0.685981	1	0.390369	1	0.614904	1	0.242827	1	0.000659449	1	0.889983	1	0.994071	1	0.637559	1	0.374814	1	0.281242	1	0.770257	1	0.856319	1	0.0609636	1	0.847873	1
438	10	64959612	64965464	5852	4	0.425632	1	0.27496	1	0.730607	1	0.766102	1	0.727987	1	0.440023	1	0.910158	1	0.83138	1	0.977902	1	0.0881425	1	0.467527	1	0.195328	1	0.590283	1	0.0985313	1	0.0662777	1	0.353111	1	0.11968	1	0.0514799	1	0.245305	1
439	10	65108691	65113379	4688	7	0.376897	1	0.484653	1	0.679031	1	0.987185	1	0.8147	1	0.426488	1	0.383375	1	0.814221	1	0.692693	1	0.0737439	1	0.348708	1	0.11947	1	0.909229	1	0.0288148	1	0.034979	1	0.253747	1	0.128201	1	0.260649	1	0.517922	1
440	10	65208081	65240478	32397	5	0.683199	1	0.381899	1	0.284971	1	0.954086	1	0.931778	1	0.659339	1	0.776645	1	0.419254	1	0.546538	1	0.172702	1	0.455062	1	0.161846	1	0.593078	1	0.125826	1	0.0715336	1	0.291982	1	0.245672	1	0.0440494	1	0.415331	1
441	10	70494361	70494548	187	4	0.821938	1	0.525145	1	0.659984	1	0.0292659	1	0.543281	1	0.803584	1	0.0679412	1	0.764544	1	0.558623	1	0.987225	1	0.731761	1	0.690944	1	0.923538	1	0.942575	1	0.641177	1	0.734192	1	0.0742632	1	0.432264	1	0.646951	1
442	10	72164250	72231618	67368	11	0.0132052	1	0.617544	1	0.920874	1	0.631775	1	0.559557	1	0.0121549	1	0.113002	1	0.804442	1	0.786806	1	0.703629	1	0.37787	1	0.655339	1	0.321492	1	0.780612	1	0.945027	1	0.639466	1	0.27317	1	0.85955	1	0.745582	1
443	10	73046724	73090099	43375	9	0.0394078	1	0.975703	1	0.944467	1	0.209368	1	0.98473	1	0.0366299	1	0.0264274	1	0.982379	1	0.957204	1	0.840546	1	0.109499	1	0.877523	1	0.704303	1	0.803463	1	0.680287	1	0.946048	1	0.316516	1	0.629929	1	0.85722	1
444	10	87785880	87786384	504	4	0.28386	1	0.728625	1	0.697922	1	0.652803	1	0.84701	1	0.266898	1	0.265109	1	0.672169	1	0.761077	1	0.815184	1	0.329157	1	0.365428	1	0.932407	1	0.544443	1	0.597586	1	0.372405	1	0.313107	1	0.652248	1	0.160652	1
445	10	99340365	99364548	24183	8	0.184971	1	0.198029	1	0.136257	1	0.345554	1	0.902779	1	0.229745	1	0.00658937	1	0.217163	1	0.345325	1	0.197275	1	0.229135	1	0.679445	1	0.561854	1	0.444133	1	0.813841	1	0.688205	1	0.557494	1	0.752987	1	0.211307	1
446	10	103379190	103397024	17834	12	0.673926	1	0.733725	1	0.300922	1	0.405963	1	0.625796	1	0.639778	1	0.750689	1	0.897054	1	0.380323	1	0.37088	1	0.0987058	1	0.414817	1	0.809134	1	0.193659	1	0.446579	1	0.481466	1	0.443425	1	0.577002	1	0.466683	1
447	10	103726788	103890930	164142	35	0.654707	1	0.846626	1	0.201907	1	0.184371	1	0.929095	1	0.597996	1	0.00988375	1	0.284974	1	0.428497	1	0.458257	1	0.402151	1	0.104386	1	0.295432	1	0.0197928	1	0.0688785	1	0.185868	1	0.273584	1	0.617196	1	0.170496	1
448	10	109341525	109363075	21550	12	0.491269	1	0.680463	1	0.637859	1	0.0316262	1	0.605281	1	0.481251	1	0.838857	1	0.837923	1	0.572304	1	0.441328	1	0.133894	1	0.953496	1	0.277054	1	0.99748	1	0.985573	1	0.945388	1	0.256328	1	0.710998	1	0.643474	1
449	10	111372429	111375473	3044	5	0.461103	1	0.601326	1	0.436987	1	0.257719	1	0.247112	1	0.470616	1	0.522448	1	0.938952	1	0.283659	1	0.418493	1	0.144432	1	0.687162	1	0.781862	1	0.705184	1	0.757068	1	0.721976	1	0.0250127	1	0.00549491	1	0.927784	1
450	10	115399439	115404360	4921	6	0.0734349	1	0.345238	1	0.982163	1	0.858088	1	0.361844	1	0.0762356	1	0.291897	1	0.563607	1	0.605936	1	0.984757	1	0.752999	1	0.220665	1	0.966703	1	0.800284	1	0.972431	1	0.170667	1	0.146948	1	0.00115101	0.87822	0.240508	1
451	10	117614479	117746451	131972	25	0.988682	1	0.192859	1	0.697142	1	0.000477309	0.363709	0.600606	1	0.930065	1	0.808551	1	0.487807	1	0.946063	1	0.815521	1	0.889339	1	0.91453	1	0.0100873	1	0.6834	1	0.915159	1	0.950359	1	0.756389	1	0.661051	1	0.812095	1
452	10	123514580	123514754	174	2	0.68801	1	0.513278	1	0.991402	1	0.336967	1	0.716654	1	0.628565	1	0.655406	1	0.596462	1	0.825289	1	0.982884	1	0.93276	1	0.448651	1	0.779545	1	0.531341	1	0.375341	1	0.548587	1	0.286743	1	0.568471	1	0.358459	1
453	10	126303572	126304575	1003	4	0.979105	1	0.171647	1	0.494093	1	0.717456	1	0.79392	1	0.961058	1	0.213537	1	0.36282	1	0.799457	1	0.910558	1	0.960472	1	0.225741	1	0.253645	1	0.711088	1	0.297153	1	0.289889	1	0.561279	1	0.651378	1	0.108282	1
454	10	126764978	126765568	590	9	0.719622	1	0.858565	1	0.936437	1	0.760855	1	0.103308	1	0.77812	1	0.672969	1	0.395024	1	0.343278	1	0.300096	1	0.863962	1	0.338389	1	0.727714	1	0.915493	1	0.800337	1	0.254962	1	0.84804	1	0.976373	1	0.676668	1
455	10	129849758	129883067	33309	10	0.671351	1	0.826639	1	0.871453	1	0.999983	1	0.116238	1	0.767099	1	0.990551	1	0.0714822	1	0.427726	1	0.16742	1	0.0946414	1	0.817102	1	0.174142	1	0.636303	1	0.879762	1	0.745003	1	0.241375	1	0.249412	1	0.618287	1
456	11	3416276	3416511	235	6	0.820761	1	0.926268	1	0.903821	1	0.115194	1	0.891017	1	0.783794	1	0.657722	1	0.669081	1	0.901461	1	0.724035	1	0.120781	1	0.174548	1	0.395568	1	0.462274	1	0.503097	1	0.0927532	1	0.936961	1	0.646882	1	0.733209	1
457	11	21397151	21398878	1727	6	0.570739	1	0.337104	1	0.493247	1	0.411844	1	0.966627	1	0.657474	1	0.368743	1	0.588618	1	0.693457	1	0.11798	1	0.442466	1	0.829213	1	0.720583	1	0.381995	1	0.352466	1	0.623796	1	0.475663	1	0.720503	1	0.0612803	1
458	11	22235060	22253961	18901	8	0.627651	1	0.590023	1	0.539096	1	0.805416	1	0.789337	1	0.601112	1	0.723756	1	0.802574	1	0.592811	1	0.448574	1	0.272952	1	0.690788	1	0.771555	1	0.526245	1	0.503239	1	0.527917	1	0.245653	1	0.746763	1	0.668675	1
459	11	29035527	29037126	1599	5	0.41259	1	0.749095	1	0.964686	1	0.202832	1	0.24425	1	0.355003	1	0.799709	1	0.4982	1	0.482817	1	0.386313	1	0.791367	1	0.491094	1	0.669157	1	0.975842	1	0.357197	1	0.307194	1	0.574029	1	0.132654	1	0.212205	1
460	11	29170076	29217510	47434	9	0.460451	1	0.727382	1	0.913449	1	0.181441	1	0.476557	1	0.39866	1	0.571869	1	0.670818	1	0.713734	1	0.728194	1	0.766655	1	0.817189	1	0.802258	1	0.212299	1	0.0540936	1	0.432238	1	0.426868	1	0.345624	1	0.961932	1
461	11	32188750	32201707	12957	10	0.764879	1	0.270901	1	0.506158	1	0.143658	1	0.54533	1	0.587407	1	0.911799	1	0.370946	1	0.951856	1	0.822582	1	0.400965	1	0.981281	1	0.334646	1	0.901989	1	0.617926	1	0.917241	1	0.321363	1	0.83224	1	0.707001	1
462	11	33113226	33113486	260	5	0.0950347	1	0.326456	1	0.24638	1	0.285201	1	0.288433	1	0.129754	1	0.158225	1	0.584405	1	0.193784	1	0.427872	1	0.880231	1	0.67869	1	0.550588	1	0.710996	1	0.239487	1	0.883957	1	0.0803068	1	0.10784	1	0.0854881	1
463	11	33359372	33375067	15695	4	0.0293195	1	0.54089	1	0.274823	1	0.210192	1	0.358121	1	0.0465217	1	0.100486	1	0.488416	1	0.242516	1	0.495602	1	0.716337	1	0.659174	1	0.48153	1	0.664164	1	0.24398	1	0.862053	1	0.061117	1	0.111427	1	0.0445986	1
464	11	33520397	33534591	14194	17	0.0731808	1	0.448756	1	0.318605	1	0.315744	1	0.302682	1	0.109825	1	0.121551	1	0.603616	1	0.237138	1	0.707579	1	0.652708	1	0.745276	1	0.478147	1	0.537845	1	0.158546	1	0.986914	1	0.0596821	1	0.110737	1	0.138123	1
465	11	35243687	35260436	16749	9	0.992308	1	0.223996	1	0.699897	1	0.877435	1	0.523718	1	0.949691	1	0.235721	1	0.343472	1	0.895144	1	0.540728	1	0.45059	1	0.00733049	1	0.835669	1	0.131647	1	0.194777	1	0.00900675	1	0.712278	1	0.869386	1	0.0507395	1
466	11	40938197	40942448	4251	3	0.419705	1	0.33136	1	0.270081	1	0.424553	1	0.342685	1	0.365001	1	0.781642	1	0.494386	1	0.234575	1	0.432072	1	0.483647	1	0.0763639	1	0.213916	1	0.137937	1	0.0253731	1	0.181038	1	0.200822	1	0.864265	1	0.173214	1
467	11	41644605	41644707	102	2	0.872409	1	0.716907	1	0.0300834	1	0.317161	1	0.0931667	1	0.761805	1	0.327433	1	0.197403	1	0.0238555	1	0.242266	1	0.508453	1	0.941071	1	0.229024	1	0.573546	1	0.643349	1	0.972266	1	0.321275	1	0.531578	1	0.0145909	1
468	11	45592572	45593461	889	3	0.884881	1	0.310668	1	0.878309	1	0.544995	1	0.715649	1	0.927117	1	0.73012	1	0.379164	1	0.934518	1	0.127175	1	0.76716	1	0.785879	1	0.586136	1	0.454077	1	0.535019	1	0.905319	1	0.644794	1	0.861263	1	0.514782	1
469	11	46482581	46488864	6283	4	0.800731	1	0.666444	1	0.772868	1	0.668395	1	0.909804	1	0.770224	1	0.743338	1	0.902436	1	0.822412	1	0.671219	1	0.227536	1	0.868312	1	0.678079	1	0.456606	1	0.727384	1	0.932128	1	0.247886	1	0.523869	1	0.184097	1
470	11	47002461	47007067	4606	6	0.322009	1	0.435	1	0.810609	1	0.900396	1	0.564511	1	0.338731	1	0.798793	1	0.995	1	0.630913	1	0.419675	1	0.350994	1	0.124042	1	0.738977	1	0.173134	1	0.136531	1	0.195708	1	0.398664	1	0.932173	1	0.699308	1
471	11	48851297	48886868	35571	11	0.195036	1	0.507044	1	0.144745	1	0.544008	1	0.380684	1	0.165201	1	0.373855	1	0.394671	1	0.167501	1	0.782593	1	0.207939	1	0.751278	1	0.832289	1	0.685894	1	0.751406	1	0.807786	1	0.222884	1	0.325988	1	0.948486	1
472	11	59279699	59279901	202	2	0.283869	1	0.153083	1	0.464257	1	0.49517	1	0.99102	1	0.273832	1	0.265554	1	0.255152	1	0.667158	1	0.992648	1	0.870034	1	0.256438	1	0.873364	1	0.50383	1	0.337982	1	0.123252	1	0.798818	1	0.644599	1	0.91811	1
473	11	60139991	60140876	885	2	0.457853	1	0.216447	1	0.913122	1	0.500334	1	0.459399	1	0.483636	1	0.105762	1	0.256576	1	0.725834	1	0.810534	1	0.528866	1	0.0171838	1	0.716486	1	0.650432	1	0.785778	1	0.00953675	1	0.679206	1	0.848102	1	0.583467	1
474	11	62217314	62234630	17316	19	0.766828	1	0.0318204	1	0.93779	1	0.192821	1	0.553263	1	0.787564	1	0.87572	1	0.689017	1	0.765207	1	0.481745	1	0.429258	1	0.0339984	1	0.924573	1	0.051953	1	0.195946	1	0.0449822	1	0.374132	1	0.299931	1	0.769237	1
475	11	64416011	64432150	16139	6	0.595172	1	0.499485	1	0.20223	1	0.00277501	1	0.657473	1	0.629461	1	0.663405	1	0.21112	1	0.31345	1	0.230331	1	0.60595	1	0.974855	1	0.548344	1	0.331383	1	0.0905852	1	0.66242	1	0.401324	1	0.824495	1	0.422847	1
476	11	70974623	71017152	42529	41	0.968678	1	0.977139	1	0.905495	1	0.527637	1	0.41816	1	0.962523	1	0.834461	1	0.74068	1	0.666209	1	0.912734	1	0.283761	1	0.623213	1	0.791921	1	0.73116	1	0.730519	1	0.526488	1	0.162985	1	0.669885	1	0.200557	1
477	11	73070371	73074216	3845	3	0.676792	1	0.447692	1	0.00643495	1	0.652505	1	0.859888	1	0.528076	1	0.889787	1	0.025767	1	0.0969387	1	0.359011	1	0.430698	1	0.193643	1	0.135771	1	0.0532639	1	0.0441456	1	0.380523	1	0.330141	1	0.87839	1	0.211265	1
478	11	73503033	73598632	95599	21	0.465779	1	0.341166	1	0.853567	1	0.760451	1	0.484121	1	0.41558	1	0.785692	1	0.287581	1	0.746824	1	0.234524	1	0.986413	1	0.646769	1	0.585726	1	0.574323	1	0.337709	1	0.802212	1	0.361621	1	0.643571	1	0.830736	1
479	11	91182491	91224527	42036	10	0.596401	1	0.159781	1	0.556308	1	0.948572	1	0.25184	1	0.587518	1	0.333677	1	0.949635	1	0.321278	1	0.747723	1	0.959699	1	0.941826	1	0.365479	1	0.0428492	1	0.100949	1	0.714987	1	0.786645	1	0.752133	1	0.93658	1
480	11	91549365	91640179	90814	26	0.208566	1	0.330525	1	0.323166	1	0.714381	1	0.138156	1	0.217747	1	0.544581	1	0.486651	1	0.151966	1	0.489679	1	0.790674	1	0.218183	1	0.319273	1	0.0247188	1	0.035916	1	0.423485	1	0.604616	1	0.758875	1	0.689468	1
481	11	99948025	99948032	7	3	0.175354	1	0.628193	1	0.632767	1	0.0421918	1	0.927968	1	0.159634	1	0.518629	1	0.645444	1	0.741931	1	0.0879994	1	0.168506	1	0.342234	1	0.0449445	1	0.612809	1	0.891766	1	0.270057	1	0.954758	1	0.484156	1	0.819972	1
482	11	112741985	112742345	360	2	0.140893	1	0.342457	1	0.593166	1	0.20107	1	0.272955	1	0.189328	1	0.145172	1	0.240336	1	0.75733	1	0.828256	1	0.392672	1	0.573892	1	0.849737	1	0.682328	1	0.596314	1	0.633025	1	0.684539	1	0.481111	1	0.312928	1
483	11	116602360	116630414	28054	33	0.0105269	1	0.508491	1	0.930881	1	0.52048	1	0.876744	1	0.0100332	1	0.359598	1	0.918297	1	0.898685	1	0.311175	1	0.369137	1	0.357161	1	0.858962	1	0.894211	1	0.831412	1	0.282685	1	0.379357	1	0.587241	1	0.00442534	1
484	11	120870358	120888586	18228	9	0.0655878	1	0.526557	1	0.164854	1	0.734091	1	0.636805	1	0.0922204	1	0.876089	1	0.0330568	1	0.592678	1	0.302426	1	0.658155	1	0.764169	1	0.710934	1	0.790398	1	0.987742	1	0.721362	1	0.608361	1	0.084219	1	0.357239	1
485	11	121303097	121310264	7167	6	0.394432	1	0.378665	1	0.241784	1	0.639319	1	0.831566	1	0.50322	1	0.981862	1	0.0674416	1	0.57198	1	0.520538	1	0.844956	1	0.688464	1	0.999063	1	0.429843	1	0.432125	1	0.503755	1	0.654122	1	0.0606437	1	0.609429	1
486	12	11545659	11610212	64553	13	0.0415826	1	0.454473	1	0.0898013	1	0.59103	1	0.26543	1	0.0445368	1	0.470244	1	0.117051	1	0.109304	1	0.908316	1	0.440185	1	0.651831	1	0.184572	1	0.753453	1	0.985301	1	0.62741	1	0.308542	1	0.577806	1	0.367644	1
487	12	15689452	15691335	1883	4	0.564948	1	0.16577	1	0.484793	1	0.446678	1	0.0211198	1	0.566352	1	0.235394	1	0.57922	1	0.0872172	1	0.685528	1	0.824222	1	0.87744	1	0.486184	1	0.930168	1	0.804603	1	0.819484	1	0.275151	1	0.21329	1	0.652616	1
488	12	18193095	18552020	358925	63	0.513384	1	0.742017	1	0.681954	1	0.854744	1	0.803865	1	0.618397	1	0.4282	1	0.594217	1	0.903843	1	0.491968	1	0.0256099	1	0.917085	1	0.781091	1	0.325126	1	0.146054	1	0.783346	1	0.958142	1	0.823304	1	0.659561	1
489	12	28320295	28349039	28744	15	0.863777	1	0.876306	1	0.846858	1	0.271377	1	0.76756	1	0.991649	1	0.359998	1	0.698541	1	0.770675	1	0.254715	1	0.516613	1	0.0260604	1	0.608575	1	0.0851395	1	0.0595259	1	0.0518887	1	0.231791	1	0.0289414	1	0.000737525	0.562732
490	12	29152942	29155139	2197	3	0.314523	1	0.810593	1	0.849278	1	0.971279	1	0.403441	1	0.219841	1	0.783433	1	0.59524	1	0.728345	1	0.76522	1	0.08373	1	0.216651	1	0.98884	1	0.0383235	1	0.188525	1	0.308037	1	0.0689228	1	0.798849	1	0.66924	1
491	12	30667058	30671688	4630	16	0.831587	1	0.935769	1	0.340677	1	0.22553	1	0.741902	1	0.783452	1	0.923818	1	0.436301	1	0.458289	1	0.180787	1	0.835144	1	0.434686	1	0.202506	1	0.396627	1	0.549302	1	0.481863	1	0.617961	1	0.429851	1	0.460033	1
492	12	32849195	32849548	353	2	0.260208	1	0.0108826	1	0.384621	1	0.327734	1	0.142406	1	0.283107	1	0.33632	1	0.981393	1	0.180311	1	0.13017	1	0.576827	1	0.0335083	1	0.438032	1	0.245527	1	0.213316	1	0.0449952	1	0.288242	1	0.711589	1	0.806127	1
493	12	33508991	33511756	2765	8	0.389978	1	0.0598679	1	0.481605	1	0.24315	1	0.2018	1	0.407644	1	0.403126	1	0.954395	1	0.257616	1	0.286323	1	0.427145	1	0.0530497	1	0.50595	1	0.26506	1	0.288907	1	0.0648634	1	0.254211	1	0.682246	1	0.755894	1
494	12	38175763	38194460	18697	6	0.355931	1	0.648437	1	0.582758	1	0.334865	1	0.0983188	1	0.345782	1	0.755586	1	0.631445	1	0.198491	1	0.295864	1	0.604934	1	0.921464	1	0.227339	1	0.914346	1	0.902787	1	0.897007	1	0.850295	1	0.992493	1	0.131688	1
495	12	49411350	49474614	63264	14	0.918355	1	0.536461	1	0.921959	1	0.651461	1	0.810956	1	0.948331	1	0.960494	1	0.508872	1	0.856227	1	0.698999	1	0.948245	1	0.814349	1	0.804094	1	0.515114	1	0.416267	1	0.636291	1	0.40411	1	0.148197	1	0.152919	1
496	12	50509608	50895726	386118	74	0.411268	1	0.631976	1	0.874456	1	0.858046	1	0.857992	1	0.411133	1	0.346126	1	0.818751	1	0.988225	1	0.815658	1	0.581455	1	0.273383	1	0.40614	1	0.483802	1	0.140132	1	0.4099	1	0.90838	1	0.318403	1	0.849783	1
497	12	57140406	57157776	17370	11	0.00649267	1	0.068534	1	0.805294	1	0.664232	1	0.602371	1	0.00426466	1	0.315356	1	0.656049	1	0.862862	1	0.521393	1	0.749131	1	0.490773	1	0.428676	1	0.400964	1	0.410624	1	0.580416	1	0.498149	1	0.668246	1	0.400554	1
498	12	57366059	57387621	21562	8	0.000897547	0.685726	0.054302	1	0.944898	1	0.615474	1	0.560533	1	0.000512058	0.391212	0.303814	1	0.811775	1	0.755223	1	0.435264	1	0.545151	1	0.668651	1	0.456689	1	0.601249	1	0.525789	1	0.754936	1	0.416932	1	0.487441	1	0.209511	1
499	12	60477871	60593624	115753	26	0.685904	1	0.642741	1	0.933966	1	0.109963	1	0.622875	1	0.602121	1	0.203887	1	0.682149	1	0.73383	1	0.801967	1	0.68178	1	0.220538	1	0.283618	1	0.922645	1	0.844832	1	0.159786	1	0.144512	1	0.273804	1	0.0305556	1
500	12	63970065	63970552	487	4	0.832114	1	0.203554	1	0.285059	1	0.233629	1	0.244116	1	0.829953	1	0.836911	1	0.902148	1	0.198104	1	0.548623	1	0.280419	1	0.774739	1	0.252103	1	0.466844	1	0.917556	1	0.772714	1	0.0730686	1	0.243747	1	0.225355	1
501	12	64045150	64099191	54041	11	0.994627	1	0.245129	1	0.237976	1	0.287594	1	0.188609	1	0.985779	1	0.457594	1	0.903416	1	0.151239	1	0.455396	1	0.509465	1	0.846212	1	0.210975	1	0.42309	1	0.928186	1	0.807259	1	0.135079	1	0.445637	1	0.495146	1
502	12	66669557	66671717	2160	5	0.159093	1	0.0429073	1	0.0861293	1	0.285803	1	0.0115702	1	0.170881	1	0.917444	1	0.99324	1	0.0137391	1	0.125815	1	0.170555	1	0.797691	1	0.636831	1	0.494397	1	0.702692	1	0.691248	1	0.415224	1	0.401002	1	0.101412	1
503	12	68607278	68622771	15493	7	0.206731	1	0.024746	1	0.0536004	1	0.241273	1	0.00537507	1	0.212513	1	0.911367	1	0.89907	1	0.00584037	1	0.0582256	1	0.163349	1	0.881686	1	0.590093	1	0.643327	1	0.788884	1	0.806284	1	0.623252	1	0.39703	1	0.0690566	1
504	12	69722650	69722675	25	2	0.600545	1	0.54473	1	0.459176	1	0.802501	1	0.436676	1	0.674929	1	0.926206	1	0.773927	1	0.377163	1	0.329966	1	0.10419	1	0.563684	1	0.271205	1	0.552209	1	0.740362	1	0.586616	1	0.815448	1	0.814762	1	0.0734593	1
505	12	75478580	75484124	5544	6	0.548037	1	0.87988	1	0.687608	1	0.940367	1	0.673938	1	0.520534	1	0.505099	1	0.962203	1	0.607988	1	0.811563	1	0.632194	1	0.0141738	1	0.467379	1	0.00918405	1	0.0203882	1	0.0367777	1	0.0955977	1	0.00545215	1	0.109767	1
506	12	75965852	75973713	7861	4	0.954731	1	0.461243	1	0.464941	1	0.436786	1	0.595618	1	0.960029	1	0.362208	1	0.337276	1	0.890265	1	0.10862	1	0.735667	1	0.373588	1	0.265178	1	0.584768	1	0.794736	1	0.359302	1	0.828953	1	0.939172	1	0.115944	1
507	12	77072190	77074593	2403	3	0.286195	1	0.0800152	1	0.890125	1	0.706782	1	0.820473	1	0.246066	1	0.169665	1	0.69202	1	0.926641	1	0.496743	1	0.397134	1	0.186414	1	0.116156	1	0.163389	1	0.252973	1	0.244992	1	0.177588	1	0.0108329	1	0.36614	1
508	12	77397670	77403999	6329	18	0.0604414	1	0.394712	1	0.819739	1	0.130351	1	0.463696	1	0.0744122	1	0.440533	1	0.403709	1	0.765366	1	0.83803	1	0.334463	1	0.718949	1	0.160185	1	0.247236	1	0.60357	1	0.599674	1	0.364434	1	0.336542	1	0.0690286	1
509	12	85202936	85230001	27065	4	0.63754	1	0.279339	1	0.452851	1	0.623538	1	0.810819	1	0.686215	1	0.186861	1	0.881149	1	0.757022	1	0.73816	1	0.288525	1	0.664403	1	0.977166	1	0.66864	1	0.546711	1	0.511561	1	0.340595	1	0.0963914	1	0.813539	1
510	12	89139185	89415572	276387	30	0.542648	1	0.437215	1	0.30048	1	0.529821	1	0.495876	1	0.541548	1	0.185337	1	0.223054	1	0.328062	1	0.040004	1	0.986811	1	0.111275	1	0.942734	1	0.407142	1	0.508246	1	0.111673	1	0.966812	1	0.430103	1	0.828076	1
511	12	93121761	93132845	11084	12	0.866025	1	0.961467	1	0.0725393	1	0.801029	1	0.358566	1	0.889844	1	0.0758722	1	0.00648324	1	0.606025	1	0.0748654	1	0.9866	1	0.537764	1	0.0700808	1	0.587009	1	0.810048	1	0.447114	1	0.932258	1	0.0833721	1	0.373176	1
512	12	94915259	94917313	2054	6	0.793311	1	0.835674	1	0.286898	1	0.711998	1	0.517413	1	0.768296	1	0.35701	1	0.196737	1	0.802384	1	0.0974867	1	0.389158	1	0.25902	1	0.116675	1	0.752775	1	0.869269	1	0.186951	1	0.792102	1	0.236367	1	0.523524	1
513	12	94931070	94939081	8011	3	0.80479	1	0.140734	1	0.984899	1	0.653887	1	0.946113	1	0.718631	1	0.377095	1	0.797043	1	0.984004	1	0.27884	1	0.890694	1	0.701781	1	0.137415	1	0.787478	1	0.53287	1	0.791454	1	0.544252	1	0.197634	1	0.530739	1
514	12	96196196	96223173	26977	11	0.310783	1	0.69353	1	0.516789	1	0.260929	1	0.483494	1	0.275282	1	0.405092	1	0.596878	1	0.442284	1	0.102293	1	0.0762038	1	0.814224	1	0.00267144	1	0.843116	1	0.951754	1	0.808708	1	0.975219	1	0.884028	1	0.956417	1
515	12	96623312	96623586	274	2	0.679524	1	0.460734	1	0.731702	1	0.122013	1	0.18542	1	0.595462	1	0.751819	1	0.138594	1	0.588951	1	0.205699	1	0.18183	1	0.0641095	1	0.605706	1	0.268508	1	0.891723	1	0.0432717	1	0.491623	1	0.414232	1	0.118244	1
516	12	100077912	100080008	2096	7	0.00117845	0.899161	0.0204735	1	0.352938	1	0.916303	1	0.180959	1	0.00158425	1	0.00298127	1	0.0483871	1	0.839478	1	0.627614	1	0.284114	1	0.0823885	1	0.627139	1	0.433647	1	0.915567	1	0.0555074	1	0.748538	1	0.886875	1	0.074078	1
517	12	100214407	100217042	2635	6	0.00403753	1	0.181174	1	0.652027	1	0.892395	1	0.318747	1	0.0042171	1	0.00975454	1	0.255737	1	0.778513	1	0.987389	1	0.738882	1	0.0252139	1	0.00484446	1	0.0443848	1	0.055279	1	0.0509857	1	0.733703	1	0.272371	1	0.376559	1
518	12	102582454	102828642	246188	96	0.0760982	1	0.508271	1	0.554465	1	0.868298	1	0.166845	1	0.0858822	1	0.895713	1	0.840817	1	0.24378	1	0.821834	1	0.560807	1	0.462832	1	0.968956	1	0.472536	1	0.533788	1	0.318358	1	0.931688	1	0.307722	1	0.696445	1
519	12	110355216	110412139	56923	8	0.0669036	1	0.537698	1	0.464689	1	0.226434	1	0.418857	1	0.0659973	1	0.710755	1	0.980477	1	0.387244	1	0.455409	1	0.226787	1	0.498469	1	0.975046	1	0.628228	1	0.885557	1	0.484288	1	0.0617906	1	0.217236	1	0.910437	1
520	12	111254016	111287270	33254	5	0.174219	1	0.664127	1	0.23177	1	0.0795354	1	0.0371714	1	0.178975	1	0.0699827	1	0.894241	1	0.0590636	1	0.875716	1	0.326952	1	0.401392	1	0.327615	1	0.797189	1	0.350146	1	0.497168	1	0.372704	1	0.654142	1	0.964667	1
521	12	112776324	112778081	1757	12	0.622879	1	0.0107157	1	0.748118	1	0.851028	1	0.591768	1	0.527263	1	0.528222	1	0.879964	1	0.612319	1	0.445539	1	0.702661	1	0.509934	1	0.499012	1	0.761455	1	0.813447	1	0.41918	1	0.0597886	1	0.041519	1	0.0232235	1
522	12	114835711	114963919	128208	50	0.293531	1	0.25814	1	0.411328	1	0.718022	1	0.589113	1	0.200801	1	0.88396	1	0.383692	1	0.857451	1	0.63295	1	0.367125	1	0.373318	1	0.94286	1	0.540807	1	0.230259	1	0.193906	1	0.358022	1	0.543127	1	0.483041	1
523	12	115034479	115040077	5598	8	0.461402	1	0.2951	1	0.934789	1	0.177893	1	0.563125	1	0.446999	1	0.778231	1	0.40629	1	0.777476	1	0.245246	1	0.670962	1	0.666678	1	0.795098	1	0.566283	1	0.544852	1	0.754664	1	0.56649	1	0.437423	1	0.392644	1
524	12	115186599	115379105	192506	64	0.850434	1	0.743992	1	0.661739	1	0.744922	1	0.921434	1	0.763414	1	0.246593	1	0.906217	1	0.840535	1	0.376709	1	0.812073	1	0.625769	1	0.365325	1	0.437735	1	0.207489	1	0.38764	1	0.749749	1	0.177533	1	0.372063	1
525	12	115674340	115700639	26299	6	0.893574	1	0.467013	1	0.606277	1	0.621628	1	0.680342	1	0.745037	1	0.149464	1	0.612772	1	0.94011	1	0.295558	1	0.5651	1	0.566163	1	0.281983	1	0.229438	1	0.114804	1	0.296639	1	0.238962	1	0.262102	1	0.389734	1
526	12	115795799	115842787	46988	18	0.944627	1	0.85558	1	0.702375	1	0.788228	1	0.901959	1	0.831117	1	0.181896	1	0.858157	1	0.877174	1	0.364676	1	0.776631	1	0.58115	1	0.409749	1	0.447964	1	0.254964	1	0.365737	1	0.6441	1	0.171611	1	0.430255	1
527	12	115869496	115975158	105662	31	0.576049	1	0.559959	1	0.844955	1	0.917196	1	0.625005	1	0.470216	1	0.229472	1	0.896492	1	0.877551	1	0.391723	1	0.685238	1	0.515135	1	0.557962	1	0.415038	1	0.235461	1	0.304466	1	0.415834	1	0.270301	1	0.297757	1
528	12	116056336	116152952	96616	27	0.379708	1	0.276136	1	0.794979	1	0.880924	1	0.554252	1	0.274029	1	0.347534	1	0.760778	1	0.859273	1	0.666206	1	0.83516	1	0.297604	1	0.496979	1	0.358307	1	0.194866	1	0.135476	1	0.412766	1	0.277746	1	0.26375	1
529	12	116193887	116195061	1174	6	0.81109	1	0.910367	1	0.664951	1	0.684926	1	0.901681	1	0.71842	1	0.208345	1	0.847036	1	0.853229	1	0.473272	1	0.680382	1	0.918381	1	0.341354	1	0.349657	1	0.209533	1	0.660756	1	0.718209	1	0.140853	1	0.257101	1
530	12	116359895	116583730	223835	83	0.504168	1	0.637248	1	0.843917	1	0.878451	1	0.538548	1	0.403395	1	0.235654	1	0.814021	1	0.819221	1	0.499117	1	0.657109	1	0.402947	1	0.591174	1	0.473825	1	0.245141	1	0.21848	1	0.571205	1	0.18981	1	0.233378	1
531	12	116745882	117040993	295111	41	0.707813	1	0.259178	1	0.934715	1	0.672681	1	0.217422	1	0.559465	1	0.142126	1	0.511845	1	0.525272	1	0.466927	1	0.733098	1	0.577752	1	0.996131	1	0.319717	1	0.181309	1	0.335666	1	0.183354	1	0.302523	1	0.300812	1
532	12	117059447	117200047	140600	41	0.691051	1	0.970702	1	0.987867	1	0.713952	1	0.892168	1	0.624794	1	0.402381	1	0.65456	1	0.947382	1	0.59247	1	0.524976	1	0.706051	1	0.422724	1	0.530883	1	0.301832	1	0.493636	1	0.934678	1	0.233836	1	0.389503	1
533	12	117219726	117240329	20603	9	0.8403	1	0.235719	1	0.743392	1	0.884843	1	0.34105	1	0.696521	1	0.214155	1	0.430478	1	0.737438	1	0.888699	1	0.901809	1	0.451849	1	0.969178	1	0.362231	1	0.211769	1	0.245888	1	0.234615	1	0.343306	1	0.415561	1
534	12	117915807	117945526	29719	12	0.392421	1	0.756933	1	0.420831	1	0.616925	1	0.287755	1	0.36889	1	0.77972	1	0.931	1	0.286643	1	0.865947	1	0.825285	1	0.735668	1	0.501472	1	0.686285	1	0.49811	1	0.582066	1	0.382488	1	0.51229	1	0.742817	1
535	13	7649110	7724259	75149	19	0.899841	1	0.991488	1	0.802732	1	0.659047	1	0.802912	1	0.895463	1	0.678648	1	0.573804	1	0.78696	1	0.632862	1	0.762787	1	0.900171	1	0.912541	1	0.761216	1	0.935622	1	0.90051	1	0.756224	1	0.95868	1	0.837065	1
536	13	12573915	12574894	979	3	0.794034	1	0.30779	1	0.567845	1	0.480231	1	0.243813	1	0.757114	1	0.293623	1	0.874026	1	0.3315	1	0.780879	1	0.270483	1	0.67692	1	0.0185268	1	0.629215	1	0.84009	1	0.606002	1	0.968163	1	0.42835	1	0.550077	1
537	13	13804037	13805108	1071	5	0.979453	1	0.639776	1	0.353948	1	0.801053	1	0.491768	1	0.885534	1	0.0498845	1	0.119563	1	0.861301	1	0.933814	1	0.691314	1	0.546689	1	0.0310211	1	0.57863	1	0.358621	1	0.665451	1	0.229763	1	0.396178	1	0.533687	1
538	13	13972917	13987506	14589	8	0.893864	1	0.614818	1	0.288129	1	0.945718	1	0.291841	1	0.995051	1	0.0147232	1	0.0416279	1	0.964514	1	0.912122	1	0.662145	1	0.296254	1	0.0471914	1	0.549599	1	0.290737	1	0.378261	1	0.0792505	1	0.320238	1	0.474809	1
539	13	15251117	15261775	10658	7	0.929179	1	0.542944	1	0.406788	1	0.242728	1	0.896735	1	0.977118	1	0.389023	1	0.278546	1	0.689063	1	0.414967	1	0.765407	1	0.0370283	1	0.487231	1	0.165709	1	0.213436	1	0.0457019	1	0.0205237	1	0.910966	1	0.298183	1
540	13	16433591	16468016	34425	6	0.4293	1	0.737509	1	0.790572	1	0.843664	1	0.175974	1	0.41542	1	0.825128	1	0.37394	1	0.356689	1	0.644182	1	0.547498	1	0.728514	1	0.399253	1	0.962277	1	0.83414	1	0.67062	1	0.319097	1	0.708442	1	0.200931	1
541	13	17090987	17129337	38350	12	0.79286	1	0.567547	1	0.317556	1	0.895974	1	0.0486408	1	0.815355	1	0.24785	1	0.463576	1	0.0910101	1	0.264605	1	0.278027	1	0.708699	1	0.910928	1	0.394137	1	0.184968	1	0.95988	1	0.724428	1	0.799787	1	0.206378	1
542	13	17220681	17226530	5849	6	0.727546	1	0.42389	1	0.196869	1	0.56201	1	0.12736	1	0.727509	1	0.549829	1	0.864455	1	0.108568	1	0.760332	1	0.130172	1	0.182721	1	0.0803654	1	0.242789	1	0.283878	1	0.227469	1	0.425064	1	0.177511	1	0.610097	1
543	13	17390746	17391604	858	3	0.489431	1	0.927044	1	0.413556	1	0.60482	1	0.0184225	1	0.52054	1	0.445774	1	0.2619	1	0.0719939	1	0.420994	1	0.346422	1	0.60924	1	0.813788	1	0.797508	1	0.641591	1	0.669879	1	0.399072	1	0.839144	1	0.285623	1
544	13	17574927	17603308	28381	9	0.488932	1	0.266626	1	0.927051	1	0.27511	1	0.77168	1	0.472817	1	0.951731	1	0.870541	1	0.920266	1	0.238594	1	0.834124	1	0.984623	1	0.552547	1	0.664703	1	0.247841	1	0.737068	1	0.782812	1	0.951134	1	0.0301779	1
545	13	18383273	18417107	33834	17	0.704374	1	0.727323	1	0.511178	1	0.194011	1	0.561766	1	0.694344	1	0.743163	1	0.798279	1	0.487189	1	0.353716	1	0.424591	1	0.644199	1	0.49256	1	0.821905	1	0.425979	1	0.465262	1	0.297038	1	0.970542	1	0.0276434	1
546	13	19273334	19275613	2279	9	0.373977	1	0.293139	1	0.210599	1	0.835523	1	0.538019	1	0.398856	1	0.565654	1	0.71704	1	0.274376	1	0.986243	1	0.046253	1	0.327998	1	0.93791	1	0.486026	1	0.30998	1	0.429102	1	0.256033	1	0.646563	1	0.436036	1
547	13	22180406	22247428	67022	20	0.520095	1	0.876108	1	0.952135	1	0.586573	1	0.994917	1	0.596047	1	0.639191	1	0.671744	1	0.970844	1	0.557291	1	0.0956855	1	0.403734	1	0.693352	1	0.440151	1	0.758261	1	0.400571	1	0.247551	1	0.859811	1	0.680142	1
548	13	23653701	23668319	14618	21	0.767032	1	0.0576978	1	0.791495	1	0.485771	1	0.173731	1	0.721507	1	0.101775	1	0.177077	1	0.547109	1	0.809051	1	0.566056	1	0.58535	1	0.338381	1	0.602515	1	0.972623	1	0.534017	1	0.657833	1	0.200229	1	0.841251	1
549	13	25099130	25099212	82	3	0.235694	1	0.0448526	1	0.813864	1	0.519469	1	0.58412	1	0.236125	1	0.632331	1	0.756224	1	0.64103	1	0.944141	1	0.18407	1	0.610985	1	0.503477	1	0.604614	1	0.24782	1	0.808777	1	0.888852	1	0.677661	1	0.978727	1
550	13	25542964	25545689	2725	3	0.694016	1	0.0491736	1	0.864101	1	0.285338	1	0.588531	1	0.711821	1	0.572107	1	0.594644	1	0.833277	1	0.884518	1	0.0475244	1	0.612428	1	0.531591	1	0.678335	1	0.236023	1	0.809715	1	0.766253	1	0.939454	1	0.944007	1
551	13	26062769	26097780	35011	6	0.28507	1	0.134978	1	0.559159	1	0.333337	1	0.733402	1	0.31497	1	0.417397	1	0.52822	1	0.881178	1	0.465771	1	0.485224	1	0.817936	1	0.552941	1	0.929612	1	0.58303	1	0.68726	1	0.996481	1	0.389338	1	0.973557	1
552	13	47103645	47106624	2979	8	0.702489	1	0.81721	1	0.173742	1	0.940326	1	0.950955	1	0.651976	1	0.641747	1	0.297348	1	0.440857	1	0.529806	1	0.872298	1	0.167541	1	0.0455366	1	0.0201711	1	0.01185	1	0.396488	1	0.850935	1	0.906395	1	0.408958	1
553	13	51435014	51439412	4398	4	0.180436	1	0.984261	1	0.582	1	0.516918	1	0.0458118	1	0.189472	1	0.480923	1	0.29371	1	0.148334	1	0.707585	1	0.6561	1	0.794123	1	0.585623	1	0.680437	1	0.483964	1	0.626198	1	0.888253	1	0.945014	1	0.271718	1
554	13	52271399	52275352	3953	6	0.123592	1	0.0161788	1	0.186641	1	0.528315	1	0.118898	1	0.097405	1	0.592087	1	0.558143	1	0.0949843	1	0.958669	1	0.628731	1	0.0765545	1	0.548549	1	0.144444	1	0.305441	1	0.0917439	1	0.368986	1	0.676475	1	0.574018	1
555	13	65478774	66913713	1434939	36	0.172889	1	0.800759	1	0.884165	1	0.48519	1	0.415506	1	0.13954	1	0.359937	1	0.574793	1	0.721182	1	0.0426508	1	0.392587	1	0.21024	1	0.0721857	1	0.49574	1	0.776747	1	0.184435	1	0.235542	1	0.46536	1	0.65414	1
556	13	67635961	67639652	3691	5	0.896552	1	0.680747	1	0.829934	1	0.179358	1	0.617075	1	0.973144	1	0.18191	1	0.485043	1	0.880108	1	0.3598	1	0.18655	1	0.400049	1	0.276245	1	0.382696	1	0.589812	1	0.421405	1	0.207028	1	0.436366	1	0.455423	1
557	13	70109094	70129981	20887	9	0.680818	1	0.320472	1	0.849898	1	0.392777	1	0.63407	1	0.656021	1	0.776598	1	0.689801	1	0.873014	1	0.154756	1	0.852253	1	0.775287	1	0.141333	1	0.376001	1	0.384228	1	0.93808	1	0.694447	1	0.514512	1	0.939729	1
558	13	70444536	70451412	6876	16	0.844611	1	0.6563	1	0.163139	1	0.785988	1	0.557907	1	0.778261	1	0.994144	1	0.263798	1	0.251479	1	0.435411	1	0.142039	1	0.247588	1	0.733465	1	0.298465	1	0.107029	1	0.397866	1	0.528588	1	0.707298	1	0.243462	1
559	13	71170616	71187686	17070	5	0.71898	1	0.97472	1	0.204836	1	0.290636	1	0.363327	1	0.645015	1	0.988266	1	0.3502	1	0.207591	1	0.0773942	1	0.477823	1	0.510613	1	0.803502	1	0.735939	1	0.874136	1	0.48467	1	0.219773	1	0.778801	1	0.678179	1
560	13	73527064	73546036	18972	7	0.322181	1	0.577368	1	0.796909	1	0.0843498	1	0.902708	1	0.313884	1	0.570013	1	0.732906	1	0.823638	1	0.832826	1	0.0966386	1	0.260819	1	0.688923	1	0.804755	1	0.929267	1	0.216952	1	0.0903816	1	0.991452	1	0.473405	1
561	13	73546675	73574553	27878	11	0.0473194	1	0.777576	1	0.991716	1	0.580133	1	0.521153	1	0.0471045	1	0.236232	1	0.857141	1	0.723441	1	0.697576	1	0.464353	1	0.438852	1	0.120838	1	0.96023	1	0.76283	1	0.342585	1	0.433056	1	0.752118	1	0.267193	1
562	13	74876460	74877016	556	4	0.150699	1	0.707756	1	0.920932	1	0.164828	1	0.848789	1	0.143738	1	0.577042	1	0.897652	1	0.952	1	0.287143	1	0.423796	1	0.554888	1	0.165293	1	0.719094	1	0.762745	1	0.555482	1	0.131917	1	0.815001	1	0.260512	1
563	13	87580492	87732309	151817	19	0.469954	1	0.0546809	1	0.707387	1	0.963203	1	0.17154	1	0.484036	1	0.383684	1	0.395031	1	0.318	1	0.333447	1	0.395479	1	0.148385	1	0.349693	1	0.311328	1	0.111778	1	0.236872	1	0.146385	1	0.493952	1	0.649924	1
564	13	95862954	95864309	1355	4	0.25565	1	0.302723	1	0.607014	1	0.311709	1	0.418535	1	0.253439	1	0.34294	1	0.210082	1	0.860783	1	0.0688266	1	0.596084	1	0.223966	1	0.00133587	1	0.752722	1	0.613402	1	0.21912	1	0.0809252	1	0.999696	1	0.952978	1
565	13	101131358	101185606	54248	42	0.145263	1	0.882939	1	0.0324014	1	0.406338	1	0.115166	1	0.18243	1	0.186174	1	0.0918546	1	0.0310089	1	0.275635	1	0.830097	1	0.516155	1	0.00339682	1	0.136683	1	0.0658804	1	0.824583	1	0.615347	1	0.237787	1	0.578385	1
566	13	101744103	101745478	1375	4	0.500471	1	0.213334	1	0.125876	1	0.621166	1	0.99263	1	0.59155	1	0.860079	1	0.0485782	1	0.362221	1	0.562438	1	0.0849267	1	0.615067	1	0.464382	1	0.463862	1	0.527186	1	0.70368	1	0.0958065	1	0.454566	1	0.0724098	1
567	13	104201097	104203640	2543	4	0.885677	1	0.900374	1	0.792975	1	0.589232	1	0.767051	1	0.803727	1	0.92759	1	0.540395	1	0.746745	1	0.73338	1	0.145388	1	0.46455	1	0.852707	1	0.572185	1	0.21624	1	0.624165	1	0.577828	1	0.527497	1	0.347792	1
568	13	104734657	104736352	1695	4	0.65186	1	0.939386	1	0.570316	1	0.51631	1	0.405066	1	0.670591	1	0.594565	1	0.942762	1	0.416215	1	0.100522	1	0.532899	1	0.00848517	1	0.710276	1	0.0231818	1	0.0139482	1	0.025158	1	0.515721	1	0.264453	1	0.0132152	1
569	13	109177164	109203852	26688	19	0.203779	1	0.107781	1	0.452974	1	0.102123	1	0.671371	1	0.216306	1	0.700728	1	0.614322	1	0.503228	1	0.0917093	1	0.611116	1	0.166693	1	0.797538	1	0.892948	1	0.781229	1	0.109582	1	0.721068	1	0.0370862	1	0.0212736	1
570	13	110143424	110148369	4945	4	0.238209	1	0.189442	1	0.87828	1	0.663042	1	0.48935	1	0.206003	1	0.140019	1	0.637764	1	0.625446	1	0.0496545	1	0.741729	1	0.115064	1	0.844363	1	0.927657	1	0.510533	1	0.0519621	1	0.593548	1	0.0557434	1	0.365737	1
571	13	110285017	110360210	75193	25	0.258199	1	0.0153233	1	0.892599	1	0.618575	1	0.598795	1	0.220735	1	0.171032	1	0.60237	1	0.813583	1	0.128713	1	0.25948	1	0.10299	1	0.545007	1	0.437639	1	0.922973	1	0.0641712	1	0.186832	1	0.0200214	1	0.752127	1
572	13	110512099	110531531	19432	16	0.469204	1	0.0777753	1	0.548331	1	0.309519	1	0.615444	1	0.497425	1	0.296392	1	0.837629	1	0.53655	1	0.12687	1	0.231738	1	0.39579	1	0.904837	1	0.627743	1	0.287141	1	0.511919	1	0.982188	1	0.670929	1	0.469757	1
573	13	111250585	111303484	52899	9	0.24628	1	0.122854	1	0.835828	1	0.277334	1	0.909763	1	0.280274	1	0.613619	1	0.908933	1	0.832707	1	0.581306	1	0.556851	1	0.86891	1	0.533732	1	0.989522	1	0.344081	1	0.663011	1	0.630318	1	0.320573	1	0.0577413	1
574	13	112541067	112542692	1625	9	0.229045	1	0.132196	1	0.968227	1	0.421038	1	0.98458	1	0.235907	1	0.694192	1	0.890891	1	0.969061	1	0.971038	1	0.360739	1	0.82881	1	0.923933	1	0.932333	1	0.275862	1	0.955861	1	0.311068	1	0.567501	1	0.160076	1
575	13	114694855	114724317	29462	12	0.384957	1	0.395745	1	0.41968	1	0.597623	1	0.270835	1	0.325958	1	0.193522	1	0.580344	1	0.272858	1	0.349404	1	0.478566	1	0.331883	1	0.407121	1	0.556378	1	0.391318	1	0.4121	1	0.269441	1	0.722649	1	0.254643	1
576	13	115684513	115685411	898	2	0.0994685	1	0.359094	1	0.683799	1	0.793357	1	0.959833	1	0.100359	1	0.251062	1	0.604462	1	0.789268	1	0.724692	1	0.814068	1	0.586839	1	0.534205	1	0.336703	1	0.386012	1	0.719771	1	0.944373	1	0.46782	1	0.111993	1
577	13	118198423	118226410	27987	14	0.665607	1	0.660125	1	0.110433	1	0.562111	1	0.770535	1	0.677118	1	0.89094	1	0.152754	1	0.269658	1	0.277469	1	0.863682	1	0.768831	1	0.405436	1	0.34381	1	0.417714	1	0.575889	1	0.996416	1	0.485685	1	0.943812	1
578	13	118327963	118338845	10882	6	0.431577	1	0.159371	1	0.0240068	1	0.926306	1	0.163767	1	0.347	1	0.779417	1	0.16743	1	0.0330613	1	0.325317	1	0.331941	1	0.727499	1	0.741414	1	0.160493	1	0.0583595	1	0.361205	1	0.732781	1	0.509662	1	0.373203	1
579	14	3200632	7671143	4470511	61	0.463278	1	0.688822	1	0.913712	1	0.807612	1	0.734794	1	0.37802	1	0.735832	1	0.92192	1	0.908066	1	0.317291	1	0.105881	1	0.821354	1	0.918395	1	0.215153	1	0.415807	1	0.973889	1	0.725204	1	0.985432	1	0.421259	1
580	14	9476924	9491919	14995	7	0.065303	1	0.646119	1	0.387673	1	0.461303	1	0.137255	1	0.0574989	1	0.769287	1	0.620027	1	0.168017	1	0.103243	1	0.88551	1	0.471142	1	0.620642	1	0.269357	1	0.240413	1	0.259851	1	0.828533	1	0.441989	1	0.217916	1
581	14	11851066	11874015	22949	9	0.499771	1	0.951814	1	0.666832	1	0.398074	1	0.329831	1	0.57614	1	0.477686	1	0.565264	1	0.422817	1	0.376047	1	0.226018	1	0.741781	1	0.874288	1	0.745739	1	0.850983	1	0.763254	1	0.0223505	1	0.742072	1	0.625268	1
582	14	13703652	13703878	226	2	0.507073	1	0.754343	1	0.982838	1	0.318403	1	0.495179	1	0.550574	1	0.468008	1	0.485815	1	0.71374	1	0.518484	1	0.736083	1	0.484556	1	0.947112	1	0.518877	1	0.681104	1	0.510632	1	0.322582	1	0.385106	1	0.32967	1
583	14	13832594	13842014	9420	6	0.564067	1	0.579274	1	0.6586	1	0.21335	1	0.603317	1	0.669093	1	0.0576567	1	0.237645	1	0.975189	1	0.350292	1	0.5328	1	0.558693	1	0.218664	1	0.494339	1	0.617196	1	0.619219	1	0.137542	1	0.33714	1	0.296932	1
584	14	17144372	17180428	36056	17	0.658034	1	0.688844	1	0.799592	1	0.79879	1	0.610977	1	0.603144	1	0.953412	1	0.392423	1	0.888834	1	0.755014	1	0.730744	1	0.259375	1	0.478808	1	0.291901	1	0.559372	1	0.284718	1	0.18137	1	0.31895	1	0.164732	1
585	14	31420361	31420623	262	6	0.580414	1	0.352805	1	0.268502	1	0.246589	1	0.189742	1	0.615563	1	0.178901	1	0.813165	1	0.162204	1	0.314575	1	0.108026	1	0.502685	1	0.0411876	1	0.974048	1	0.738259	1	0.409585	1	0.702643	1	0.124636	1	0.85034	1
586	14	34491963	34505348	13385	5	0.590439	1	0.970292	1	0.855267	1	0.977836	1	0.218125	1	0.531475	1	0.295284	1	0.460709	1	0.435226	1	0.868074	1	0.253461	1	0.25251	1	0.345468	1	0.393098	1	0.302104	1	0.322465	1	0.312181	1	0.0811983	1	0.577429	1
587	14	34935044	34947005	11961	4	0.900649	1	0.511943	1	0.828829	1	0.467613	1	0.359225	1	0.816674	1	0.164706	1	0.408422	1	0.716839	1	0.353819	1	0.85288	1	0.822189	1	0.182762	1	0.484573	1	0.72868	1	0.88302	1	0.389782	1	0.181844	1	0.0775348	1
588	14	35539377	35543834	4457	7	0.942291	1	0.433959	1	0.318719	1	0.173318	1	0.0113674	1	0.972007	1	0.578301	1	0.599556	1	0.0478647	1	0.0743643	1	0.931743	1	0.327075	1	0.869361	1	0.18226	1	0.15575	1	0.487139	1	0.711272	1	0.816058	1	0.109084	1
589	14	36416179	36417134	955	4	0.738131	1	0.415606	1	0.84663	1	0.859398	1	0.0627843	1	0.769999	1	0.689999	1	0.340356	1	0.25912	1	0.112578	1	0.195087	1	0.430244	1	0.608039	1	0.196214	1	0.293313	1	0.548621	1	0.260088	1	0.255847	1	0.19423	1
590	14	36600804	36600995	191	3	0.417988	1	0.418439	1	0.874626	1	0.3916	1	0.110728	1	0.353689	1	0.557399	1	0.315735	1	0.44102	1	0.152192	1	0.995628	1	0.345213	1	0.478215	1	0.109334	1	0.11536	1	0.544838	1	0.568552	1	0.797903	1	0.106272	1
591	14	37935152	37946976	11824	22	0.237781	1	0.461014	1	0.412154	1	0.907272	1	0.738817	1	0.315012	1	0.0630221	1	0.155019	1	0.778153	1	0.301683	1	0.195231	1	0.786268	1	0.0283342	1	0.851131	1	0.851963	1	0.720825	1	0.394894	1	0.499149	1	0.219084	1
592	14	40544167	40564409	20242	9	0.873725	1	0.799506	1	0.3378	1	0.777091	1	0.374669	1	0.872206	1	0.717823	1	0.808242	1	0.294791	1	0.830154	1	0.932139	1	0.696669	1	0.681174	1	0.288497	1	0.969969	1	0.643561	1	0.718273	1	0.864106	1	0.532937	1
593	14	40716609	40737506	20897	5	0.76966	1	0.855728	1	0.0451802	1	0.307847	1	0.126944	1	0.767429	1	0.732303	1	0.145655	1	0.0414353	1	0.502296	1	0.885459	1	0.150485	1	0.460109	1	0.189041	1	0.291731	1	0.191344	1	0.2649	1	0.542939	1	0.601382	1
594	14	40897017	40992496	95479	21	0.988321	1	0.399601	1	0.0875345	1	0.20342	1	0.0469692	1	0.946827	1	0.481962	1	0.678563	1	0.0336122	1	0.229231	1	0.779325	1	0.583099	1	0.772014	1	0.931904	1	0.980714	1	0.538708	1	0.707898	1	0.665892	1	0.928741	1
595	14	41640656	41648076	7420	5	0.75771	1	0.498264	1	0.112941	1	0.654703	1	0.610746	1	0.74457	1	0.738932	1	0.111537	1	0.229119	1	0.560398	1	0.717356	1	0.152212	1	0.579222	1	0.393138	1	0.742306	1	0.131693	1	0.881238	1	0.257869	1	0.963095	1
596	14	42076755	42953331	876576	23	0.270727	1	0.959566	1	0.350675	1	0.692988	1	0.764504	1	0.271191	1	0.498706	1	0.22093	1	0.467185	1	0.338771	1	0.112935	1	0.654454	1	0.716985	1	0.969826	1	0.65646	1	0.53671	1	0.752887	1	0.71185	1	0.846154	1
597	14	44396801	45349904	953103	75	0.686327	1	0.244918	1	0.855061	1	0.364927	1	0.258457	1	0.55943	1	0.737188	1	0.283268	1	0.614225	1	0.372974	1	0.88565	1	0.995031	1	0.550283	1	0.587895	1	0.306642	1	0.773028	1	0.0224562	1	0.208626	1	0.302925	1
598	14	52484180	52492450	8270	8	0.536386	1	0.554053	1	0.38293	1	0.723703	1	0.298173	1	0.454502	1	0.572194	1	0.804332	1	0.266026	1	0.631723	1	0.883066	1	0.822805	1	0.362593	1	0.990288	1	0.848327	1	0.767418	1	0.657725	1	0.472563	1	0.863357	1
599	14	63523410	63543436	20026	8	0.104895	1	0.390337	1	0.668582	1	0.211704	1	0.08644	1	0.120863	1	0.131877	1	0.427111	1	0.222976	1	0.478696	1	0.176969	1	0.309672	1	0.185816	1	0.6188	1	0.685558	1	0.316308	1	0.0407221	1	0.0688513	1	0.538113	1
600	14	63715836	63731412	15576	7	0.0418305	1	0.27903	1	0.636999	1	0.732797	1	0.101855	1	0.0418538	1	0.286797	1	0.764662	1	0.232208	1	0.775292	1	0.405701	1	0.488646	1	0.193548	1	0.944168	1	0.956544	1	0.437607	1	0.416187	1	0.0255993	1	0.610202	1
601	14	68685551	68694460	8909	3	0.83041	1	0.628133	1	0.948846	1	0.672578	1	0.463617	1	0.769384	1	0.776484	1	0.735297	1	0.689911	1	0.889086	1	0.390202	1	0.588466	1	0.900591	1	0.27148	1	0.2886	1	0.766485	1	0.777958	1	0.493158	1	0.984818	1
602	14	72880516	72895559	15043	6	0.81558	1	0.0399005	1	0.895169	1	0.709671	1	0.93486	1	0.759454	1	0.577881	1	0.929912	1	0.913466	1	0.202091	1	0.869206	1	0.979384	1	0.543564	1	0.487856	1	0.148118	1	0.670219	1	0.620333	1	0.912377	1	0.110374	1
603	14	72957542	72959141	1599	7	0.435948	1	0.0901048	1	0.855179	1	0.203737	1	0.632842	1	0.476893	1	0.171647	1	0.415645	1	0.87905	1	0.0753063	1	0.502589	1	0.864115	1	0.95606	1	0.434811	1	0.0947146	1	0.790713	1	0.754567	1	0.881067	1	0.146044	1
604	14	73243966	73249111	5145	6	0.579758	1	0.00793913	1	0.452082	1	0.532498	1	0.694582	1	0.616559	1	0.368799	1	0.449222	1	0.500534	1	0.109134	1	0.79052	1	0.940688	1	0.899527	1	0.456616	1	0.0692146	1	0.678603	1	0.657974	1	0.723338	1	0.0975443	1
605	14	74318558	74331581	13023	7	0.204525	1	0.0499482	1	0.479203	1	0.514337	1	0.733099	1	0.218026	1	0.425999	1	0.216936	1	0.553673	1	0.128307	1	0.665342	1	0.896258	1	0.473171	1	0.0411842	1	0.122345	1	0.573147	1	0.608036	1	0.0952887	1	0.819327	1
606	14	75621182	75623938	2756	8	0.307705	1	0.132327	1	0.790256	1	0.602109	1	0.906808	1	0.296347	1	0.241964	1	0.435683	1	0.824018	1	0.254168	1	0.649258	1	0.364094	1	0.885241	1	0.0916167	1	0.320618	1	0.195341	1	0.293133	1	0.142371	1	0.780122	1
607	14	78207014	78207745	731	3	0.0296085	1	0.398034	1	0.91233	1	0.805464	1	0.240983	1	0.0291431	1	0.016057	1	0.386561	1	0.557527	1	0.0556402	1	0.953049	1	0.445814	1	0.315616	1	0.697556	1	0.385173	1	0.277455	1	0.341575	1	0.848787	1	0.174528	1
608	14	79921672	79935942	14270	5	0.0951897	1	0.862308	1	0.880094	1	0.302061	1	0.210434	1	0.0995533	1	0.00412654	1	0.427237	1	0.428026	1	0.24037	1	0.655459	1	0.0119591	1	0.430872	1	0.399501	1	0.584401	1	0.00843203	1	0.267548	1	0.595677	1	0.389555	1
609	14	81762359	82272046	509687	95	0.187394	1	0.273795	1	0.443152	1	0.263796	1	0.192105	1	0.223843	1	0.856052	1	0.815108	1	0.223343	1	0.315128	1	0.366565	1	0.0238042	1	0.668066	1	0.521005	1	0.754805	1	0.0153004	1	0.26284	1	0.398606	1	0.0128846	1
610	14	83692252	83699784	7532	4	0.96858	1	0.990353	1	0.866613	1	0.807518	1	0.503121	1	0.911406	1	0.705302	1	0.876215	1	0.758213	1	0.705712	1	0.789953	1	0.0337058	1	0.728042	1	0.695203	1	0.541527	1	0.0101348	1	0.783025	1	0.152199	1	0.28599	1
611	14	84107263	84127489	20226	7	0.321387	1	0.793893	1	0.191041	1	0.300724	1	0.340633	1	0.30359	1	0.152136	1	0.325744	1	0.197769	1	0.821041	1	0.0681813	1	0.706014	1	0.211518	1	0.863815	1	0.500124	1	0.546105	1	0.780135	1	0.760305	1	0.545905	1
612	14	84464875	84610363	145488	25	0.176225	1	0.7048	1	0.479762	1	0.43265	1	0.79061	1	0.157412	1	0.177909	1	0.183542	1	0.803323	1	0.279277	1	0.183743	1	0.76762	1	0.185928	1	0.532599	1	0.201412	1	0.493231	1	0.288796	1	0.478178	1	0.652014	1
613	14	85098924	85109651	10727	4	0.266216	1	0.494457	1	0.591293	1	0.521769	1	0.242922	1	0.254374	1	0.480857	1	0.84607	1	0.328721	1	0.802758	1	0.230041	1	0.435203	1	0.74829	1	0.65963	1	0.702566	1	0.330414	1	0.794087	1	0.236065	1	0.159712	1
614	14	90380187	90380247	60	2	0.597449	1	0.0223809	1	0.968059	1	0.330197	1	0.83647	1	0.55426	1	0.322253	1	0.833081	1	0.88876	1	0.389524	1	0.518535	1	0.0421937	1	0.257743	1	0.655454	1	0.903686	1	0.0254221	1	0.523689	1	0.644702	1	0.797757	1
615	14	91461859	91492733	30874	4	0.840788	1	0.0522782	1	0.56453	1	0.682937	1	0.305408	1	0.813616	1	0.973863	1	0.991865	1	0.353656	1	0.235978	1	0.783624	1	0.117024	1	0.608111	1	0.558836	1	0.896085	1	0.0886126	1	0.64261	1	0.483583	1	0.282345	1
616	14	95445940	95528057	82117	17	0.270167	1	0.242868	1	0.124157	1	0.823087	1	0.0887604	1	0.219476	1	0.884775	1	0.561827	1	0.0585826	1	0.239206	1	0.434003	1	0.267796	1	0.380495	1	0.654526	1	0.730649	1	0.248119	1	0.916552	1	0.664447	1	0.869717	1
617	14	97780779	97832155	51376	11	0.752685	1	0.0171157	1	0.0926809	1	0.518695	1	0.700981	1	0.613415	1	0.22651	1	0.0813551	1	0.228282	1	0.106507	1	0.173235	1	0.399895	1	0.751335	1	0.866727	1	0.630306	1	0.420775	1	0.0965421	1	0.494491	1	0.962399	1
618	14	99527482	99532575	5093	5	0.621392	1	0.0159046	1	0.910512	1	0.411946	1	0.930032	1	0.589132	1	0.914155	1	0.799745	1	0.997979	1	0.439929	1	0.935262	1	0.577231	1	0.254388	1	0.81483	1	0.881682	1	0.502022	1	0.758531	1	0.757869	1	0.387078	1
619	14	108869805	109052336	182531	21	0.231546	1	0.567283	1	0.454476	1	0.0170188	1	0.769826	1	0.235205	1	0.269977	1	0.288999	1	0.537327	1	0.692405	1	0.817548	1	0.865675	1	0.849322	1	0.508951	1	0.549922	1	0.991655	1	0.367034	1	0.0394066	1	0.224774	1
620	14	110067383	110117892	50509	23	0.260786	1	0.576141	1	0.368353	1	0.0196034	1	0.61512	1	0.27006	1	0.241897	1	0.307162	1	0.413969	1	0.865619	1	0.764873	1	0.749275	1	0.805817	1	0.305039	1	0.267561	1	0.966265	1	0.393006	1	0.0825982	1	0.190249	1
621	14	110191067	110226475	35408	15	0.158805	1	0.721373	1	0.28512	1	0.0156543	1	0.67735	1	0.161476	1	0.270424	1	0.186067	1	0.38779	1	0.732624	1	0.988348	1	0.607173	1	0.843262	1	0.231028	1	0.230313	1	0.812638	1	0.57622	1	0.116337	1	0.165832	1
622	14	111421090	111489633	68543	8	0.610114	1	0.703262	1	0.325869	1	0.0142816	1	0.240944	1	0.593597	1	0.458425	1	0.701495	1	0.216555	1	0.6402	1	0.135106	1	0.716349	1	0.0162677	1	0.822839	1	0.996498	1	0.700548	1	0.0647637	1	0.585087	1	0.690998	1
623	14	112786859	112786924	65	2	0.966897	1	0.189731	1	0.917643	1	0.322602	1	0.862891	1	0.938116	1	0.166319	1	0.702857	1	0.952962	1	0.160667	1	0.151642	1	0.259773	1	0.782225	1	0.0307804	1	0.0109041	1	0.569009	1	0.0558167	1	0.293992	1	0.983968	1
624	14	116640642	116643475	2833	7	0.213027	1	0.747877	1	0.937895	1	0.628254	1	0.975991	1	0.18438	1	0.920168	1	0.71567	1	0.934103	1	0.481261	1	0.59718	1	0.594885	1	0.34646	1	0.173855	1	0.168939	1	0.838817	1	0.639523	1	0.784159	1	0.843559	1
625	14	122006064	122006350	286	6	0.0353453	1	0.899853	1	0.537897	1	0.793934	1	0.981354	1	0.0426449	1	0.49456	1	0.484905	1	0.728882	1	0.151144	1	0.505129	1	0.554158	1	0.592626	1	0.831524	1	0.865516	1	0.486673	1	0.71574	1	0.330216	1	0.517183	1
626	15	18654064	18701020	46956	15	0.289049	1	0.786371	1	0.256431	1	0.154275	1	0.502124	1	0.290948	1	0.240522	1	0.291011	1	0.293219	1	0.685884	1	0.372459	1	0.907688	1	0.438154	1	0.854124	1	0.917364	1	0.86657	1	0.982656	1	0.414526	1	0.20258	1
627	15	18713339	18756200	42861	14	0.231598	1	0.556692	1	0.429793	1	0.377556	1	0.0558411	1	0.324482	1	0.0103124	1	0.0227581	1	0.547909	1	0.259091	1	0.902612	1	0.83809	1	0.335526	1	0.857749	1	0.676246	1	0.724658	1	0.0336093	1	0.0504714	1	0.299687	1
628	15	19835128	19869085	33957	5	0.771771	1	0.652716	1	0.459159	1	0.96375	1	0.98138	1	0.739228	1	0.467498	1	0.487251	1	0.664375	1	0.507017	1	0.126945	1	0.860304	1	0.308691	1	0.180909	1	0.0868071	1	0.789094	1	0.513131	1	0.672769	1	0.864663	1
629	15	20002200	20069823	67623	20	0.68961	1	0.363776	1	0.432539	1	0.984727	1	0.250698	1	0.629394	1	0.102468	1	0.892705	1	0.268239	1	0.521064	1	0.371444	1	0.763966	1	0.639643	1	0.995157	1	0.831056	1	0.771274	1	0.617927	1	0.869697	1	0.692128	1
630	15	21134231	21172655	38424	11	0.331622	1	0.79704	1	0.125316	1	0.596786	1	0.943987	1	0.417369	1	0.0291173	1	0.125808	1	0.40065	1	0.621504	1	0.864389	1	0.631931	1	0.0705995	1	0.811291	1	0.984843	1	0.60676	1	0.159214	1	0.939863	1	0.383905	1
631	15	21563129	21834835	271706	50	0.60074	1	0.513398	1	0.380766	1	0.482489	1	0.551418	1	0.546051	1	0.946708	1	0.125581	1	0.846415	1	0.28125	1	0.673048	1	0.0554786	1	0.599652	1	0.962096	1	0.744534	1	0.0403629	1	0.91809	1	0.865899	1	0.50856	1
632	15	22146459	22192021	45562	7	0.230736	1	0.210981	1	0.314194	1	0.608653	1	0.919144	1	0.215757	1	0.0897175	1	0.158068	1	0.592712	1	0.295272	1	0.838913	1	0.531456	1	0.885087	1	0.387956	1	0.245085	1	0.724461	1	0.901677	1	0.591957	1	0.756989	1
633	15	22457663	22478262	20599	9	0.382723	1	0.240873	1	0.31634	1	0.88127	1	0.893069	1	0.405861	1	0.144502	1	0.29209	1	0.610859	1	0.208461	1	0.417101	1	0.54398	1	0.877025	1	0.465666	1	0.401443	1	0.678139	1	0.492588	1	0.7486	1	0.896113	1
634	15	25938508	25938536	28	2	0.896492	1	0.511593	1	0.199632	1	0.959182	1	0.738274	1	0.966887	1	0.925775	1	0.0728893	1	0.577673	1	0.654166	1	0.0866628	1	0.932942	1	0.119934	1	0.229036	1	0.17749	1	0.652713	1	0.0981926	1	0.356297	1	0.358299	1
635	15	26971755	26975305	3550	3	0.683686	1	0.402999	1	0.360094	1	0.343051	1	0.440358	1	0.585238	1	0.900576	1	0.0647203	1	0.92551	1	0.884765	1	0.892583	1	0.492005	1	0.223954	1	0.992071	1	0.814315	1	0.411523	1	0.36804	1	0.734054	1	0.497629	1
636	15	29502036	29545764	43728	18	0.00966453	1	0.66522	1	0.770261	1	0.328507	1	0.124737	1	0.0066321	1	0.26413	1	0.415297	1	0.296057	1	0.322081	1	0.0693337	1	0.00715669	1	0.397398	1	0.796564	1	0.473547	1	0.00530363	1	0.430544	1	0.602482	1	0.616761	1
637	15	33880442	33900991	20549	7	0.622551	1	0.461444	1	0.534182	1	0.0729289	1	0.0402959	1	0.642228	1	0.78579	1	0.369961	1	0.127708	1	0.873549	1	0.756714	1	0.974182	1	0.206228	1	0.193642	1	0.0846293	1	0.68724	1	0.983603	1	0.891907	1	0.266272	1
638	15	42106513	42112059	5546	4	0.831042	1	0.52726	1	0.295391	1	0.649743	1	0.306133	1	0.823468	1	0.0496891	1	0.664837	1	0.238897	1	0.759173	1	0.702755	1	0.265322	1	0.472172	1	0.00161057	1	0.0018797	1	0.680629	1	0.791555	1	0.392878	1	0.326406	1
639	15	46239982	46247063	7081	8	0.59707	1	0.60096	1	0.283778	1	0.382587	1	0.801116	1	0.566942	1	0.9835	1	0.103398	1	0.633932	1	0.790211	1	0.587284	1	0.567992	1	0.477293	1	0.778121	1	0.895084	1	0.5	1	0.130947	1	0.849877	1	0.241163	1
640	15	47636509	47639595	3086	5	0.357689	1	0.472378	1	0.390382	1	0.632651	1	0.387483	1	0.349616	1	0.307069	1	0.463374	1	0.322423	1	0.0770551	1	0.382514	1	0.490795	1	0.972542	1	0.125614	1	0.0460196	1	0.802766	1	0.845375	1	0.725779	1	0.573945	1
641	15	47861366	47886626	25260	5	0.956842	1	0.602897	1	0.072239	1	0.706418	1	0.396464	1	0.925371	1	0.760263	1	0.123292	1	0.122164	1	0.696307	1	0.123768	1	0.466417	1	0.175674	1	0.978782	1	0.635436	1	0.350023	1	0.861649	1	0.604902	1	0.156787	1
642	15	47894162	47942137	47975	12	0.147179	1	0.792388	1	0.681921	1	0.232553	1	0.805037	1	0.157239	1	0.385414	1	0.673138	1	0.919189	1	0.145935	1	0.14332	1	0.0854609	1	0.377838	1	0.0449262	1	0.0447907	1	0.170572	1	0.785089	1	0.325125	1	0.543005	1
643	15	48458300	48477647	19347	3	0.522647	1	0.165974	1	0.429242	1	0.912916	1	0.237511	1	0.550899	1	0.651068	1	0.624392	1	0.255154	1	0.122036	1	0.026781	1	0.349281	1	0.979281	1	0.989737	1	0.735202	1	0.342338	1	0.12847	1	0.161677	1	0.216104	1
644	15	54022603	54023121	518	4	0.079112	1	0.114719	1	0.142117	1	0.946736	1	0.180494	1	0.0757011	1	0.184578	1	0.533212	1	0.102473	1	0.374321	1	0.976465	1	0.393204	1	0.870783	1	0.248711	1	0.306622	1	0.495355	1	0.769168	1	0.395762	1	0.282513	1
645	15	55025921	55026265	344	3	0.456307	1	0.405185	1	0.188836	1	0.263839	1	0.603338	1	0.467783	1	0.0867302	1	0.258319	1	0.286925	1	0.956134	1	0.786234	1	0.917294	1	0.691079	1	0.744208	1	0.72783	1	0.831564	1	0.994468	1	0.986878	1	0.744968	1
646	15	56628058	56711813	83755	18	0.630889	1	0.282963	1	0.23409	1	0.449816	1	0.13495	1	0.623668	1	0.485909	1	0.821973	1	0.119038	1	0.227575	1	0.0505904	1	0.531854	1	0.549803	1	0.637203	1	0.772055	1	0.537798	1	0.943031	1	0.0718847	1	0.776813	1
647	15	57135310	57181123	45813	11	0.894005	1	0.502753	1	0.325724	1	0.406644	1	0.372702	1	0.92376	1	0.496488	1	0.836341	1	0.275503	1	0.280185	1	0.0293033	1	0.661771	1	0.474144	1	0.607231	1	0.691866	1	0.709265	1	0.910081	1	0.023297	1	0.91906	1
648	15	57340168	57347478	7310	10	0.347025	1	0.556426	1	0.507073	1	0.214083	1	0.68224	1	0.343807	1	0.569185	1	0.238184	1	0.879112	1	0.090491	1	0.98828	1	0.225942	1	0.280032	1	0.413733	1	0.801785	1	0.201429	1	0.802377	1	0.305312	1	0.531522	1
649	15	57941561	57943509	1948	10	0.533031	1	0.921234	1	0.455855	1	0.69913	1	0.723168	1	0.452403	1	0.910419	1	0.691363	1	0.518552	1	0.866233	1	0.0685031	1	0.381995	1	0.202251	1	0.46023	1	0.71522	1	0.38216	1	0.65583	1	0.735219	1	0.645414	1
650	15	59688211	59688516	305	3	0.553742	1	0.988859	1	0.714106	1	0.447515	1	0.615857	1	0.444156	1	0.188025	1	0.564832	1	0.94262	1	0.900843	1	0.243639	1	0.901331	1	0.667719	1	0.592641	1	0.79424	1	0.928895	1	0.607173	1	0.42626	1	0.414121	1
651	15	59826344	59837575	11231	5	0.902129	1	0.730831	1	0.82992	1	0.353889	1	0.865771	1	0.756608	1	0.133791	1	0.805961	1	0.974244	1	0.753473	1	0.0666883	1	0.903856	1	0.819664	1	0.590873	1	0.791626	1	0.92955	1	0.652742	1	0.206102	1	0.12601	1
652	15	59995445	60044261	48816	12	0.716432	1	0.756388	1	0.91699	1	0.272017	1	0.772219	1	0.593801	1	0.0911877	1	0.813515	1	0.915205	1	0.738163	1	0.208878	1	0.757749	1	0.965364	1	0.570696	1	0.818841	1	0.763002	1	0.777754	1	0.168887	1	0.271814	1
653	15	66051348	66054407	3059	8	0.16841	1	0.761428	1	0.388122	1	0.393641	1	0.143823	1	0.180003	1	0.964307	1	0.918567	1	0.193114	1	0.898463	1	0.508073	1	0.142684	1	0.469256	1	0.188333	1	0.123573	1	0.224456	1	0.128418	1	0.434379	1	0.914802	1
654	15	67155975	67185571	29596	8	0.923718	1	0.707719	1	0.0862027	1	0.110395	1	0.0508296	1	0.876122	1	0.901934	1	0.605469	1	0.0309513	1	0.0584122	1	0.546508	1	0.971541	1	0.791245	1	0.173091	1	0.317206	1	0.750927	1	0.813902	1	0.160189	1	0.813471	1
655	15	68444814	68498293	53479	9	0.578117	1	0.1349	1	0.652143	1	0.117818	1	0.706799	1	0.616178	1	0.841339	1	0.892287	1	0.614346	1	0.248984	1	0.211331	1	0.733524	1	0.945522	1	0.432049	1	0.468311	1	0.563317	1	0.867545	1	0.703794	1	0.164292	1
656	15	91559592	91567072	7480	11	0.700345	1	0.500213	1	0.034148	1	0.73464	1	0.000996946	0.761667	0.754887	1	0.984595	1	0.646288	1	0.00179509	1	0.93568	1	0.354035	1	0.0713647	1	0.894512	1	0.00464008	1	0.00595938	1	0.207395	1	0.96157	1	0.61029	1	0.0593632	1
657	15	95128952	95144563	15611	9	0.421534	1	0.4164	1	0.797154	1	0.45324	1	0.674097	1	0.429372	1	0.619871	1	0.677691	1	0.690726	1	0.781893	1	0.433037	1	0.228729	1	0.488875	1	0.115458	1	0.095348	1	0.377307	1	0.245097	1	0.833492	1	0.995699	1
658	15	97858331	97859240	909	5	0.88631	1	0.164444	1	0.630043	1	0.833852	1	0.476575	1	0.857723	1	0.735833	1	0.887589	1	0.509342	1	0.558857	1	0.0117522	1	0.630281	1	0.390268	1	0.849756	1	0.931851	1	0.614055	1	0.308386	1	0.0372105	1	0.545339	1
659	15	100148252	100195778	47526	23	0.324739	1	0.227923	1	0.644917	1	0.767007	1	0.780615	1	0.300096	1	0.810151	1	0.550159	1	0.942631	1	0.717619	1	0.423088	1	0.900196	1	0.511432	1	0.272212	1	0.214085	1	0.832888	1	0.785295	1	0.0218369	1	0.671889	1
660	16	32184109	32184127	18	3	0.170475	1	0.00928051	1	0.586489	1	0.534959	1	0.561396	1	0.158002	1	0.783381	1	0.546665	1	0.550811	1	0.804712	1	0.158846	1	0.0353544	1	0.327595	1	0.896237	1	0.571029	1	0.0126644	1	0.415919	1	0.344944	1	0.636184	1
661	16	36257364	36334363	76999	28	0.827051	1	0.328775	1	0.999952	1	0.922203	1	0.840599	1	0.885932	1	0.775684	1	0.835994	1	0.923935	1	0.306535	1	0.483236	1	0.085088	1	0.732416	1	0.797236	1	0.683918	1	0.0708662	1	0.941771	1	0.220264	1	0.122342	1
662	16	39667623	39667660	37	2	0.775078	1	0.450631	1	0.376639	1	0.617917	1	0.72437	1	0.756854	1	0.0676501	1	0.836377	1	0.476233	1	0.0884121	1	0.347517	1	0.705069	1	0.889425	1	0.267854	1	0.379958	1	0.859012	1	0.557611	1	0.0378828	1	0.529126	1
663	16	44159384	44159604	220	3	0.0815317	1	0.539893	1	0.748055	1	0.889301	1	0.924983	1	0.0741362	1	0.765405	1	0.891711	1	0.90536	1	0.61117	1	0.923111	1	0.859535	1	0.525059	1	0.763892	1	0.919432	1	0.816551	1	0.759187	1	0.567206	1	0.804483	1
664	16	45375511	45390941	15430	5	0.170695	1	0.321078	1	0.447957	1	0.640598	1	0.932879	1	0.162866	1	0.242768	1	0.594574	1	0.609178	1	0.743732	1	0.0013297	1	0.410248	1	0.198058	1	0.260896	1	0.205371	1	0.569158	1	0.554883	1	0.15205	1	0.0263227	1
665	16	62626563	62633214	6651	7	0.698799	1	0.415886	1	0.988739	1	0.857881	1	0.888071	1	0.60412	1	0.444432	1	0.548488	1	0.937322	1	0.345191	1	0.133669	1	0.473095	1	0.718474	1	0.404605	1	0.600838	1	0.524014	1	0.272211	1	0.929004	1	0.595265	1
666	16	70097687	70137600	39913	11	0.0908973	1	0.876773	1	0.302675	1	0.610518	1	0.0373226	1	0.0815572	1	0.502498	1	0.631547	1	0.0743134	1	0.85034	1	0.434562	1	0.791434	1	0.541244	1	0.669874	1	0.966371	1	0.76819	1	0.334642	1	0.042392	1	0.31463	1
667	16	72099380	72103464	4084	5	0.469289	1	0.938687	1	0.919913	1	0.641888	1	0.48002	1	0.448124	1	0.408904	1	0.595473	1	0.744161	1	0.620103	1	0.110652	1	0.681197	1	0.12647	1	0.902177	1	0.716828	1	0.739627	1	0.869938	1	0.270669	1	0.339844	1
668	16	82784724	82800887	16163	7	0.695992	1	0.037884	1	0.247936	1	0.867639	1	0.0512087	1	0.680744	1	0.66543	1	0.795732	1	0.0769177	1	0.368205	1	0.567669	1	0.145537	1	0.329001	1	0.603912	1	0.283286	1	0.192168	1	0.427002	1	0.595701	1	0.798543	1
669	16	83059531	83101057	41526	8	0.719726	1	0.029289	1	0.124035	1	0.688121	1	0.0411411	1	0.698273	1	0.577859	1	0.955686	1	0.0405797	1	0.539963	1	0.616342	1	0.17717	1	0.317895	1	0.530868	1	0.255148	1	0.242698	1	0.436261	1	0.738502	1	0.939011	1
670	16	90821219	90821219	0	1	0.757411	1	0.955896	1	0.630593	1	0.94862	1	0.802526	1	0.713061	1	0.288288	1	0.828631	1	0.861372	1	0.0489235	1	0.196451	1	0.556981	1	0.315325	1	0.955333	1	0.829348	1	0.550433	1	0.233096	1	0.694994	1	0.931997	1
671	17	3865865	3901219	35354	14	0.348208	1	0.0892533	1	0.378254	1	0.617406	1	0.253807	1	0.397824	1	0.625495	1	0.858735	1	0.251387	1	0.466961	1	0.678938	1	0.293963	1	0.77505	1	0.499046	1	0.963183	1	0.233393	1	0.679867	1	0.705363	1	0.317656	1
672	17	4743771	4743805	34	2	0.530357	1	0.814994	1	0.108072	1	0.952746	1	0.133341	1	0.409475	1	0.727075	1	0.384334	1	0.072581	1	0.699362	1	0.770177	1	0.601941	1	0.275958	1	0.10549	1	0.525513	1	0.697976	1	0.77394	1	0.502815	1	0.305026	1
673	17	6255961	6909183	653222	59	0.00169821	1	0.638598	1	0.420479	1	0.668991	1	0.810916	1	0.00283779	1	0.201721	1	0.231373	1	0.752461	1	0.455409	1	0.0763849	1	0.727306	1	0.515267	1	0.693181	1	0.86802	1	0.744203	1	0.501662	1	0.211074	1	0.218869	1
674	17	7098601	7157189	58588	18	0.955054	1	0.761773	1	0.927628	1	0.42386	1	0.302743	1	0.953939	1	0.374491	1	0.561707	1	0.525109	1	0.584834	1	0.511454	1	0.418845	1	0.781177	1	0.633631	1	0.59927	1	0.299844	1	0.943141	1	0.147118	1	0.754937	1
675	17	13259210	13301725	42515	15	0.0737553	1	0.718177	1	0.112427	1	0.648915	1	0.417765	1	0.081866	1	0.804232	1	0.27218	1	0.175079	1	0.940459	1	0.854754	1	0.68851	1	0.981408	1	0.666497	1	0.897269	1	0.628401	1	0.455588	1	0.823844	1	0.163855	1
676	17	13398037	13649185	251148	40	0.0724967	1	0.679087	1	0.242811	1	0.271627	1	0.720608	1	0.0891783	1	0.445541	1	0.310782	1	0.39089	1	0.31377	1	0.850864	1	0.508729	1	0.603005	1	0.621729	1	0.852461	1	0.425626	1	0.42816	1	0.609164	1	0.13825	1
677	17	21378620	21419945	41325	23	0.172187	1	0.15727	1	0.632841	1	0.614547	1	0.328489	1	0.181465	1	0.432747	1	0.400165	1	0.777556	1	0.182633	1	0.634245	1	0.360031	1	0.43055	1	0.372828	1	0.101966	1	0.140031	1	0.82917	1	0.590285	1	0.201796	1
678	17	23102933	23283132	180199	16	0.952835	1	0.946512	1	0.658399	1	0.953019	1	0.89222	1	0.989549	1	0.873727	1	0.752109	1	0.867096	1	0.188308	1	0.88517	1	0.800179	1	0.722178	1	0.336728	1	0.461075	1	0.949854	1	0.24003	1	0.36779	1	0.83936	1
679	17	27427669	27585674	158005	67	0.304656	1	0.751921	1	0.798119	1	0.689895	1	0.497903	1	0.347756	1	0.395598	1	0.837142	1	0.61115	1	0.20922	1	0.305565	1	0.097346	1	0.517129	1	0.166418	1	0.527738	1	0.0436739	1	0.31879	1	0.0209997	1	0.289463	1
680	17	30582926	31058945	476019	439	0.393023	1	0.266177	1	0.883444	1	0.229877	1	0.21872	1	0.47535	1	0.566689	1	0.493298	1	0.426415	1	0.679002	1	0.280233	1	0.216972	1	0.934372	1	0.786395	1	0.662642	1	0.208527	1	0.00495679	1	0.00741659	1	0.158667	1
681	17	31987684	31988529	845	12	0.89544	1	0.0387401	1	0.996135	1	0.205436	1	0.561889	1	0.807807	1	0.870292	1	0.666896	1	0.753206	1	0.615928	1	0.589395	1	0.634711	1	0.0318355	1	0.656504	1	0.363207	1	0.786902	1	0.288721	1	0.134457	1	0.295649	1
682	17	32776807	32785160	8353	9	0.552654	1	0.343994	1	0.848379	1	0.396769	1	0.298735	1	0.647867	1	0.946533	1	0.72799	1	0.490086	1	0.455421	1	0.887966	1	0.469057	1	0.0843814	1	0.256866	1	0.218408	1	0.250515	1	0.175821	1	0.0629648	1	0.898861	1
683	17	33066096	33073239	7143	22	0.730522	1	0.718294	1	0.142958	1	0.417338	1	0.134281	1	0.644416	1	0.267823	1	0.596609	1	0.0881817	1	0.172361	1	0.0957167	1	0.776105	1	0.598486	1	0.480213	1	0.676321	1	0.666283	1	0.573324	1	0.221799	1	0.765374	1
684	17	33712337	33713456	1119	7	0.558272	1	0.115643	1	0.805753	1	0.970603	1	0.707704	1	0.526716	1	0.61411	1	0.718186	1	0.710774	1	0.375791	1	0.0314892	1	0.297854	1	0.827562	1	0.379851	1	0.882891	1	0.230972	1	0.447272	1	0.519591	1	0.0794674	1
685	17	34521273	34521839	566	4	0.17675	1	0.835808	1	0.408368	1	0.618237	1	0.0343823	1	0.168713	1	0.604674	1	0.597745	1	0.0936395	1	0.311497	1	0.627585	1	0.596519	1	0.664935	1	0.714999	1	0.734733	1	0.621893	1	0.360626	1	0.111624	1	0.284115	1
686	17	34644200	34650995	6795	8	0.469224	1	0.0417568	1	0.243862	1	0.203224	1	0.929329	1	0.577411	1	0.202927	1	0.308395	1	0.46356	1	0.18352	1	0.0188324	1	0.111923	1	0.690212	1	0.492876	1	0.284818	1	0.141445	1	0.877142	1	0.169455	1	0.742114	1
687	17	35482411	35482653	242	6	0.283857	1	0.0154776	1	0.490359	1	0.263145	1	0.33903	1	0.243558	1	0.70833	1	0.946078	1	0.351201	1	0.595719	1	0.155182	1	0.377875	1	0.782338	1	0.596968	1	0.460625	1	0.242105	1	0.563992	1	0.655336	1	0.514251	1
688	17	35565259	35576419	11160	9	0.280048	1	0.0340401	1	0.726484	1	0.212947	1	0.965447	1	0.251312	1	0.204287	1	0.804294	1	0.863201	1	0.563659	1	0.900738	1	0.341858	1	0.293612	1	0.706851	1	0.658793	1	0.242597	1	0.943322	1	0.902836	1	0.784898	1
689	17	36151872	36151991	119	3	0.768861	1	0.788271	1	0.473584	1	0.48714	1	0.628984	1	0.819585	1	0.749292	1	0.793261	1	0.494659	1	0.281955	1	0.124476	1	0.982187	1	0.829158	1	0.617268	1	0.615708	1	0.92224	1	0.285434	1	0.606962	1	0.9085	1
690	17	36167127	36248347	81220	71	0.569412	1	0.15472	1	0.98579	1	0.392103	1	0.913025	1	0.517711	1	0.92607	1	0.738578	1	0.961868	1	0.374694	1	0.0883286	1	0.746705	1	0.381083	1	0.535702	1	0.419013	1	0.571982	1	0.940245	1	0.946446	1	0.72388	1
691	17	36257749	36302789	45040	66	0.871958	1	0.530754	1	0.143419	1	0.534077	1	0.55607	1	0.991502	1	0.680488	1	0.276222	1	0.241743	1	0.331513	1	0.114756	1	0.702881	1	0.923902	1	0.530312	1	0.552824	1	0.785202	1	0.0878774	1	0.415321	1	0.700514	1
692	17	41139041	41176614	37573	8	0.792279	1	0.13306	1	0.479995	1	0.308534	1	0.167056	1	0.845205	1	0.983299	1	0.899021	1	0.245081	1	0.444917	1	0.803402	1	0.149738	1	0.637906	1	0.13018	1	0.34906	1	0.0631611	1	0.949301	1	0.753256	1	0.730225	1
693	17	43655463	43661943	6480	9	0.677935	1	0.370093	1	0.690881	1	0.260081	1	0.161303	1	0.650486	1	0.892169	1	0.198478	1	0.582035	1	0.0418783	1	0.74305	1	0.0767981	1	0.35321	1	0.214806	1	0.160342	1	0.0172376	1	0.145081	1	0.0218762	1	0.148695	1
694	17	43822177	43822413	236	4	0.732664	1	0.125989	1	0.153989	1	0.539137	1	0.52087	1	0.721438	1	0.839454	1	0.0893078	1	0.653948	1	0.122827	1	0.590624	1	0.0197248	1	0.214184	1	0.321102	1	0.196952	1	0.00284357	1	0.386378	1	0.000540135	0.412663	0.0769029	1
695	17	45324397	45349233	24836	10	0.00534917	1	0.214646	1	0.706324	1	0.243779	1	0.201154	1	0.00477736	1	0.0677219	1	0.444146	1	0.350942	1	0.492314	1	0.476252	1	0.477918	1	0.412481	1	0.186636	1	0.220957	1	0.252831	1	0.544974	1	0.323081	1	0.0770797	1
696	17	47888395	47889838	1443	5	0.14488	1	0.715919	1	0.51938	1	0.410824	1	0.388633	1	0.144016	1	0.748988	1	0.759947	1	0.379522	1	0.259373	1	0.785378	1	0.100196	1	0.14086	1	0.167537	1	0.184348	1	0.146402	1	0.99593	1	0.918968	1	0.732846	1
697	17	49818440	49818487	47	2	0.086107	1	0.11241	1	0.677569	1	0.0489669	1	0.249566	1	0.106662	1	0.361155	1	0.150301	1	0.695643	1	0.681344	1	0.877229	1	0.734913	1	0.0077751	1	0.700621	1	0.72218	1	0.778338	1	0.524388	1	0.256644	1	0.344701	1
698	17	50132851	50143591	10740	8	0.621939	1	0.252645	1	0.958161	1	0.750847	1	0.670042	1	0.617751	1	0.487941	1	0.889321	1	0.767565	1	0.219604	1	0.371689	1	0.435452	1	0.66707	1	0.465226	1	0.286448	1	0.243273	1	0.151164	1	0.11109	1	0.514745	1
699	17	50703622	50708249	4627	6	0.856127	1	0.366223	1	0.762678	1	0.516898	1	0.859207	1	0.83841	1	0.580248	1	0.82174	1	0.795671	1	0.371813	1	0.88436	1	0.553576	1	0.824824	1	0.435572	1	0.427952	1	0.66447	1	0.857524	1	0.703716	1	0.550463	1
700	17	52525043	52562891	37848	12	0.327444	1	0.703047	1	0.641395	1	0.215346	1	0.386609	1	0.336044	1	0.11213	1	0.189287	1	0.830973	1	0.0498458	1	0.991959	1	0.207137	1	0.665993	1	0.0558703	1	0.227935	1	0.286023	1	0.731135	1	0.813858	1	0.755332	1
701	17	53145663	53184954	39291	15	0.0525082	1	0.535048	1	0.0590789	1	0.432171	1	0.906845	1	0.0672934	1	0.00601022	1	0.018807	1	0.301114	1	0.563369	1	0.723017	1	0.0744114	1	0.724333	1	0.0500589	1	0.142662	1	0.111072	1	0.990419	1	0.727917	1	0.69808	1
702	17	54423215	54423500	285	3	0.9719	1	0.792884	1	0.263954	1	0.574949	1	0.0467374	1	0.978078	1	0.889648	1	0.976484	1	0.0769626	1	0.481223	1	0.570277	1	0.84959	1	0.43898	1	0.118957	1	0.475331	1	0.706713	1	0.754214	1	0.702509	1	0.509952	1
703	17	69208113	69208347	234	3	0.896331	1	0.664113	1	0.528456	1	0.784671	1	0.689705	1	0.893983	1	0.172908	1	0.778884	1	0.546433	1	0.713256	1	0.465378	1	0.792875	1	0.491144	1	0.0875922	1	0.177945	1	0.517791	1	0.960399	1	0.150788	1	0.71115	1
704	17	70419780	70420015	235	4	0.136427	1	0.0998553	1	0.163643	1	0.937711	1	0.18064	1	0.100343	1	0.466202	1	0.782285	1	0.110227	1	0.762948	1	0.874185	1	0.043977	1	0.706219	1	0.0355476	1	0.144294	1	0.0669143	1	0.720719	1	0.957502	1	0.465075	1
705	17	70731388	70734298	2910	4	0.196951	1	0.998164	1	0.487292	1	0.317461	1	0.73171	1	0.182886	1	0.827078	1	0.466016	1	0.552613	1	0.789812	1	0.446613	1	0.700513	1	0.701845	1	0.490978	1	0.461537	1	0.827444	1	0.431828	1	0.24683	1	0.663806	1
706	17	72689319	72703908	14589	13	0.816299	1	0.340397	1	0.992934	1	0.274478	1	0.868138	1	0.870964	1	0.315729	1	0.616362	1	0.950224	1	0.277195	1	0.803323	1	0.820491	1	0.595859	1	0.825257	1	0.795065	1	0.860183	1	0.222406	1	0.551476	1	0.953327	1
707	17	74806574	74808253	1679	6	0.592919	1	0.945212	1	0.946557	1	0.476413	1	0.926809	1	0.586375	1	0.791115	1	0.667919	1	0.991997	1	0.16106	1	0.959423	1	0.774356	1	0.602874	1	0.462759	1	0.658692	1	0.834789	1	0.806532	1	0.134647	1	0.792587	1
708	17	76673848	76684159	10311	8	0.640825	1	0.533458	1	0.636203	1	0.154786	1	0.904789	1	0.716633	1	0.860957	1	0.634763	1	0.748347	1	0.946605	1	0.24962	1	0.929724	1	0.772569	1	0.831901	1	0.332884	1	0.701167	1	0.853346	1	0.30135	1	0.872905	1
709	17	80443846	80449220	5374	17	0.890378	1	0.512289	1	0.151893	1	0.78516	1	0.738469	1	0.888464	1	0.555865	1	0.22522	1	0.304793	1	0.180384	1	0.970212	1	0.413822	1	0.268964	1	0.0153536	1	0.0841011	1	0.648849	1	0.684018	1	0.216898	1	0.329936	1
710	17	82353226	82354184	958	3	0.742381	1	0.219134	1	0.11919	1	0.129067	1	0.771658	1	0.911743	1	0.0409255	1	0.0606353	1	0.458289	1	0.275622	1	0.997918	1	0.0200162	1	0.309578	1	0.150958	1	0.186973	1	0.0261007	1	0.298956	1	0.415104	1	0.135827	1
711	17	85125658	85126027	369	8	0.916058	1	0.212273	1	0.741636	1	0.0754758	1	0.968709	1	0.875396	1	0.919435	1	0.854262	1	0.807398	1	0.408104	1	0.0251665	1	0.589237	1	0.712438	1	0.978879	1	0.910474	1	0.526568	1	0.269676	1	0.238918	1	0.797533	1
712	17	87411269	87421277	10008	11	0.362374	1	0.970884	1	0.828017	1	0.201778	1	0.633963	1	0.388726	1	0.862446	1	0.914052	1	0.698148	1	0.255457	1	0.957399	1	0.824267	1	0.863534	1	0.77292	1	0.990882	1	0.799454	1	0.771916	1	0.401079	1	0.729219	1
713	17	88952743	88963711	10968	20	0.387626	1	0.999668	1	0.3637	1	0.911219	1	0.941325	1	0.463471	1	0.754502	1	0.276285	1	0.637113	1	0.48216	1	0.791151	1	0.468306	1	0.0172934	1	0.0776759	1	0.150402	1	0.667875	1	0.632393	1	0.723751	1	0.397281	1
714	17	92827951	92923001	95050	18	0.512527	1	0.725453	1	0.167125	1	0.126686	1	0.202194	1	0.477461	1	0.417842	1	0.798185	1	0.131228	1	0.737986	1	0.303428	1	0.975407	1	0.392819	1	0.776832	1	0.760755	1	0.950718	1	0.378625	1	0.956136	1	0.179864	1
715	18	8199910	8205008	5098	4	0.101151	1	0.404037	1	0.666483	1	0.534993	1	0.576621	1	0.108772	1	0.165432	1	0.801164	1	0.57265	1	0.0245522	1	0.522696	1	0.251445	1	0.346759	1	0.554694	1	0.808789	1	0.180542	1	0.890891	1	0.868298	1	0.513872	1
716	18	11268641	11308509	39868	13	0.145247	1	0.11324	1	0.91395	1	0.115433	1	0.861273	1	0.147565	1	0.636722	1	0.915648	1	0.991845	1	0.931162	1	0.415504	1	0.224108	1	0.490752	1	0.612708	1	0.496045	1	0.237803	1	0.148419	1	0.498409	1	0.691929	1
717	18	12384760	12387394	2634	7	0.929472	1	0.394319	1	0.222487	1	0.317386	1	0.940359	1	0.754859	1	0.196194	1	0.214977	1	0.507544	1	0.473053	1	0.845057	1	0.328418	1	0.48594	1	0.666361	1	0.453367	1	0.380125	1	0.0239905	1	0.433171	1	0.604383	1
718	18	28685988	28686474	486	9	0.961339	1	0.849743	1	0.107183	1	0.236411	1	0.436775	1	0.98903	1	0.615433	1	0.645287	1	0.166608	1	0.456795	1	0.410622	1	0.485952	1	0.399432	1	0.438002	1	0.484689	1	0.324212	1	0.775668	1	0.611656	1	0.732402	1
719	18	32594220	32604842	10622	20	0.702065	1	0.370977	1	0.55349	1	0.503704	1	0.881998	1	0.810084	1	0.0408795	1	0.454624	1	0.790085	1	0.40919	1	0.465911	1	0.966444	1	0.485936	1	0.0722329	1	0.0845871	1	0.678261	1	0.094867	1	0.247622	1	0.267547	1
720	18	43568830	43609197	40367	17	0.611174	1	0.382505	1	0.212532	1	0.890904	1	0.907124	1	0.719362	1	0.436942	1	0.233235	1	0.500446	1	0.189589	1	0.489665	1	0.679299	1	0.618238	1	0.939018	1	0.513781	1	0.788783	1	0.350303	1	0.647274	1	0.966637	1
721	18	44715384	44733855	18471	4	0.300203	1	0.586052	1	0.121364	1	0.0907589	1	0.362953	1	0.404094	1	0.0118418	1	0.00352112	1	0.693464	1	0.25962	1	0.203745	1	0.0115622	1	0.806522	1	0.022746	1	0.0626411	1	0.0228916	1	0.930114	1	0.370483	1	0.842944	1
722	18	44814127	44831000	16873	8	0.644844	1	0.343218	1	0.0870287	1	0.180281	1	0.543105	1	0.796436	1	0.0530319	1	0.0056837	1	0.507896	1	0.385279	1	0.243154	1	0.0652522	1	0.91976	1	0.136375	1	0.246055	1	0.085056	1	0.772193	1	0.460684	1	0.699982	1
723	18	57820265	57902448	82183	39	0.0536709	1	0.724799	1	0.741472	1	0.49963	1	0.509408	1	0.0629167	1	0.953222	1	0.973235	1	0.575318	1	0.651203	1	0.585333	1	0.866401	1	0.726003	1	0.740652	1	0.756175	1	0.788551	1	0.927774	1	0.651345	1	0.108815	1
724	18	59506767	59507938	1171	3	0.999335	1	0.130803	1	0.49994	1	0.433944	1	0.616242	1	0.873581	1	0.940444	1	0.718881	1	0.473966	1	0.0924856	1	0.136619	1	0.908622	1	0.767969	1	0.130452	1	0.0623879	1	0.537633	1	0.189085	1	0.29552	1	0.491286	1
725	18	69835601	69836287	686	4	0.9558	1	0.0648901	1	0.396283	1	0.795424	1	0.998709	1	0.979668	1	0.451134	1	0.576936	1	0.619059	1	0.173208	1	0.359101	1	0.296607	1	0.637055	1	0.699452	1	0.983611	1	0.243698	1	0.993592	1	0.713701	1	0.889298	1
726	18	70602756	70623157	20401	18	0.750064	1	0.40416	1	0.664761	1	0.440222	1	0.284789	1	0.760926	1	0.517197	1	0.926046	1	0.391378	1	0.430027	1	0.706991	1	0.809041	1	0.530824	1	0.776624	1	0.944455	1	0.798844	1	0.0968133	1	0.978656	1	0.24373	1
727	18	71609676	71611282	1606	4	0.917125	1	0.532643	1	0.976129	1	0.76962	1	0.282932	1	0.93355	1	0.148891	1	0.475323	1	0.539383	1	0.0553792	1	0.654163	1	0.545672	1	0.693211	1	0.764486	1	0.95598	1	0.519162	1	0.115802	1	0.821142	1	0.397568	1
728	18	72536401	72559030	22629	10	0.764771	1	0.371499	1	0.125661	1	0.940273	1	0.133217	1	0.702497	1	0.648996	1	0.370753	1	0.0823708	1	0.951959	1	0.476129	1	0.69235	1	0.576973	1	0.283821	1	0.917678	1	0.644681	1	0.658326	1	0.806564	1	0.597044	1
729	18	72714633	72727773	13140	6	0.890471	1	0.953077	1	0.288507	1	0.330542	1	0.226092	1	0.863489	1	0.3509	1	0.588683	1	0.198702	1	0.804872	1	0.687394	1	0.907445	1	0.163302	1	0.268851	1	0.631702	1	0.995511	1	0.203096	1	0.803896	1	0.767193	1
730	18	74314441	74314504	63	3	0.757724	1	0.960579	1	0.337412	1	0.420877	1	0.589329	1	0.789168	1	0.902975	1	0.319543	1	0.399249	1	0.951021	1	0.498208	1	0.451186	1	0.47213	1	0.240449	1	0.521196	1	0.307423	1	0.682604	1	0.412079	1	0.581942	1
731	18	74681698	74696062	14364	9	0.00845652	1	0.139067	1	0.377082	1	0.783806	1	0.141651	1	0.00897615	1	0.689299	1	0.725604	1	0.165575	1	0.704787	1	0.283749	1	0.347095	1	0.339862	1	0.353796	1	0.58777	1	0.371397	1	0.448205	1	0.618206	1	0.262835	1
732	18	74750012	74750945	933	4	0.00839237	1	0.121797	1	0.136212	1	0.908854	1	0.0465205	1	0.00818101	1	0.849669	1	0.930898	1	0.0404127	1	0.805684	1	0.168187	1	0.327872	1	0.324168	1	0.436741	1	0.618858	1	0.340951	1	0.19455	1	0.843084	1	0.31422	1
733	18	75257879	75261870	3991	6	0.0355476	1	0.126006	1	0.198299	1	0.725101	1	0.141741	1	0.0329994	1	0.817005	1	0.756913	1	0.105344	1	0.750667	1	0.489079	1	0.574676	1	0.394991	1	0.755302	1	0.874878	1	0.501952	1	0.205361	1	0.442121	1	0.346962	1
734	18	85052526	85055530	3004	4	0.687256	1	0.968978	1	0.868154	1	0.30223	1	0.0922849	1	0.611585	1	0.250639	1	0.0921242	1	0.373075	1	0.389833	1	0.599695	1	0.0785285	1	0.976737	1	0.794712	1	0.854253	1	0.0457477	1	0.796741	1	0.210837	1	0.813682	1
735	19	7348368	7349675	1307	7	0.0875601	1	0.581479	1	0.311257	1	0.247461	1	0.700147	1	0.073744	1	0.792276	1	0.550852	1	0.409637	1	0.386457	1	0.74778	1	0.1386	1	0.903638	1	0.552757	1	0.536535	1	0.138998	1	0.120536	1	0.589341	1	0.305975	1
736	19	8566372	8598321	31949	6	0.233974	1	0.34573	1	0.458027	1	0.964488	1	0.113938	1	0.181759	1	0.190113	1	0.834138	1	0.182869	1	0.353107	1	0.154417	1	0.0462696	1	0.341507	1	0.54725	1	0.734963	1	0.0337566	1	0.137577	1	0.49233	1	0.132238	1
737	19	9210938	9398238	187300	34	0.668933	1	0.989512	1	0.294405	1	0.107629	1	0.0947234	1	0.696984	1	0.195563	1	0.910536	1	0.114591	1	0.242655	1	0.442225	1	0.672425	1	0.988687	1	0.623139	1	0.4519	1	0.794922	1	0.957787	1	0.189745	1	0.446208	1
738	19	11666254	11674336	8082	7	0.821067	1	0.718029	1	0.0944329	1	0.494706	1	0.673164	1	0.908263	1	0.0982588	1	0.0233236	1	0.462798	1	0.988249	1	0.822122	1	0.0305271	1	0.642462	1	0.682489	1	0.746186	1	0.0200508	1	0.674526	1	0.646717	1	0.546591	1
739	19	12220912	12308914	88002	18	0.392553	1	0.818767	1	0.976123	1	0.641022	1	0.934152	1	0.362653	1	0.391032	1	0.813744	1	0.990631	1	0.131064	1	0.854987	1	0.0180541	1	0.597486	1	0.0653309	1	0.0435607	1	0.0391059	1	0.377221	1	0.0108688	1	0.616206	1
740	19	13926464	13952598	26134	18	0.290663	1	0.684123	1	0.603708	1	0.445532	1	0.305432	1	0.270654	1	0.219225	1	0.958792	1	0.38308	1	0.53625	1	0.240045	1	0.00884561	1	0.506626	1	0.00387733	1	0.00460842	1	0.0329274	1	0.870776	1	0.0627696	1	0.26252	1
741	19	14845431	14846370	939	5	0.830696	1	0.355691	1	0.139796	1	0.297885	1	0.880951	1	0.731778	1	0.0458498	1	0.21066	1	0.440031	1	0.0410312	1	0.538816	1	0.921398	1	0.130269	1	0.249352	1	0.193293	1	0.821965	1	0.41219	1	0.182749	1	0.364658	1
742	19	15223352	15236075	12723	12	0.899118	1	0.610714	1	0.202344	1	0.196223	1	0.893771	1	0.851537	1	0.593383	1	0.222825	1	0.422839	1	0.829921	1	0.692827	1	0.404245	1	0.183421	1	0.883088	1	0.781926	1	0.321626	1	0.55266	1	0.706691	1	0.640966	1
743	19	18618198	18644452	26254	8	0.647777	1	0.352369	1	0.508806	1	0.765213	1	0.739766	1	0.59422	1	0.188484	1	0.70851	1	0.576041	1	0.794438	1	0.653939	1	0.00232359	1	0.971994	1	0.0138232	1	0.0134354	1	0.007638	1	0.073334	1	0.0339856	1	0.363055	1
744	19	19959182	19972780	13598	11	0.550316	1	0.242759	1	0.378608	1	0.477091	1	0.611984	1	0.540841	1	0.753428	1	0.673386	1	0.428461	1	0.630662	1	0.27471	1	0.61107	1	0.193685	1	0.73633	1	0.808196	1	0.628649	1	0.217558	1	0.783263	1	0.222312	1
745	19	20020406	20021069	663	4	0.466898	1	0.0521246	1	0.547984	1	0.594228	1	0.929567	1	0.556797	1	0.132654	1	0.565304	1	0.730697	1	0.235467	1	0.934087	1	0.677405	1	0.260948	1	0.559488	1	0.621315	1	0.736355	1	0.787967	1	0.812281	1	0.236244	1
746	19	22260383	22278255	17872	8	0.17825	1	0.0258712	1	0.878854	1	0.237695	1	0.889471	1	0.139017	1	0.212518	1	0.751408	1	0.979481	1	0.0430668	1	0.748682	1	0.0649447	1	0.620125	1	0.332887	1	0.36947	1	0.0738852	1	0.760445	1	0.25037	1	0.788489	1
747	19	26846010	26846087	77	3	0.379397	1	0.462409	1	0.891357	1	0.136602	1	0.377322	1	0.35083	1	0.68929	1	0.698476	1	0.54619	1	0.405695	1	0.365681	1	0.461724	1	0.811809	1	0.879776	1	0.883103	1	0.438889	1	0.156728	1	0.514489	1	0.0390679	1
748	19	33386117	33438568	52451	10	0.746213	1	0.708041	1	0.229971	1	0.0967457	1	0.937875	1	0.661547	1	0.268895	1	0.150955	1	0.493481	1	0.266854	1	0.640748	1	0.705184	1	0.841371	1	0.815898	1	0.510769	1	0.809233	1	0.0514135	1	0.259153	1	0.575603	1
749	19	33521544	33634022	112478	26	0.604542	1	0.600483	1	0.215596	1	0.0599072	1	0.99714	1	0.554317	1	0.450629	1	0.204489	1	0.453208	1	0.368553	1	0.931616	1	0.488367	1	0.995794	1	0.457725	1	0.216465	1	0.667403	1	0.156891	1	0.237109	1	0.591036	1
750	19	34662998	34681285	18287	11	0.0593679	1	0.489194	1	0.825825	1	0.0343422	1	0.239632	1	0.0822287	1	0.123634	1	0.451125	1	0.430612	1	0.642715	1	0.651435	1	0.984154	1	0.150532	1	0.871596	1	0.844766	1	0.984294	1	0.371187	1	0.598267	1	0.741927	1
751	19	35071034	35142532	71498	19	0.471023	1	0.781432	1	0.413114	1	0.0259284	1	0.856127	1	0.486405	1	0.660936	1	0.376152	1	0.550017	1	0.394856	1	0.856865	1	0.934909	1	0.164272	1	0.717216	1	0.541355	1	0.945713	1	0.0498402	1	0.31043	1	0.913478	1
752	19	35148473	35148919	446	5	0.318946	1	0.776313	1	0.183404	1	0.0316649	1	0.980256	1	0.307981	1	0.676678	1	0.155442	1	0.421737	1	0.561269	1	0.876636	1	0.807514	1	0.309285	1	0.614762	1	0.483002	1	0.932585	1	0.0363127	1	0.204488	1	0.961663	1
753	19	38127355	38132440	5085	12	0.580356	1	0.595978	1	0.275494	1	0.000133257	0.101675	0.75127	1	0.523626	1	0.661434	1	0.191398	1	0.61929	1	0.862635	1	0.775622	1	0.403659	1	0.642084	1	0.271034	1	0.245531	1	0.544636	1	0.0215934	1	0.001291	0.983744	0.940295	1
754	19	44133553	44133654	101	3	0.13233	1	0.403193	1	0.500909	1	0.875938	1	0.458686	1	0.12987	1	0.323966	1	0.947953	1	0.429254	1	0.770749	1	0.445292	1	0.846855	1	0.14781	1	0.801151	1	0.703016	1	0.753164	1	0.41084	1	0.800089	1	0.208123	1
755	19	44222802	44223055	253	4	0.173054	1	0.457027	1	0.615603	1	0.861286	1	0.502125	1	0.17546	1	0.344254	1	0.842302	1	0.51644	1	0.657811	1	0.52073	1	0.816718	1	0.163847	1	0.812795	1	0.764276	1	0.737968	1	0.470241	1	0.729633	1	0.226361	1
756	19	50825237	50868798	43561	17	0.152607	1	0.642748	1	0.120185	1	0.766539	1	0.25936	1	0.123493	1	0.815463	1	0.410609	1	0.111391	1	0.586135	1	0.171498	1	0.789088	1	0.806794	1	0.71762	1	0.615823	1	0.870117	1	0.947138	1	0.832494	1	0.752042	1
757	19	52231855	52248556	16701	4	0.813115	1	0.287312	1	0.14566	1	0.579559	1	0.00811319	1	0.773957	1	0.537658	1	0.846397	1	0.0182434	1	0.49778	1	0.50176	1	0.961222	1	0.865324	1	0.517685	1	0.813314	1	0.983079	1	0.792538	1	0.622987	1	0.185167	1
758	19	52346092	52353968	7876	6	0.498914	1	0.112006	1	0.342481	1	0.971882	1	0.0428505	1	0.519817	1	0.610528	1	0.734421	1	0.0853368	1	0.138694	1	0.230022	1	0.817635	1	0.826639	1	0.43812	1	0.492937	1	0.652389	1	0.492122	1	0.965608	1	0.616325	1
759	19	58755311	58769822	14511	9	0.241792	1	0.0373312	1	0.482075	1	0.0428614	1	0.969394	1	0.306098	1	0.538169	1	0.163488	1	0.655674	1	0.0530489	1	0.298131	1	0.611368	1	0.188243	1	0.56149	1	0.283113	1	0.386459	1	0.326689	1	0.630562	1	0.565084	1
760	19	60848615	60849582	967	6	0.189303	1	0.553984	1	0.2508	1	0.461533	1	0.510805	1	0.218075	1	0.391502	1	0.457299	1	0.289254	1	0.835145	1	0.564607	1	0.419771	1	1.8462e-05	0.014105	0.43631	1	0.545897	1	0.293225	1	0.950723	1	0.345025	1	0.158232	1
761	X	132892320	132962355	70035	9	0.277954	1	0.753187	1	0.318774	1	0.837731	1	0.828173	1	0.336539	1	0.29403	1	0.0756468	1	0.635731	1	0.077594	1	0.39314	1	0.162403	1	0.530359	1	0.077825	1	0.164455	1	0.245417	1	0.0225675	1	0.818065	1	0.984199	1
762	X	147048432	147056301	7869	9	0.355592	1	0.175577	1	0.519302	1	0.888745	1	0.264444	1	0.31428	1	0.124361	1	0.74518	1	0.308895	1	0.166678	1	0.407195	1	0.26798	1	0.695383	1	0.606618	1	0.902978	1	0.201683	1	0.743928	1	0.47726	1	0.357489	1
763	X	154298124	154298522	398	5	0.5776	1	0.785139	1	0.553749	1	0.401246	1	0.198564	1	0.610441	1	0.289096	1	0.907217	1	0.283552	1	0.739384	1	0.0905807	1	0.272947	1	0.649376	1	0.0335301	1	0.0132019	1	0.578961	1	0.176509	1	0.0676289	1	0.993853	1
764	X	166341476	166428718	87242	74	0.191409	1	0.389414	1	0.577412	1	0.550577	1	0.424102	1	0.151447	1	0.914814	1	0.937134	1	0.429082	1	0.799319	1	0.511667	1	0.28313	1	0.586171	1	0.2621	1	0.185039	1	0.413159	1	0.997196	1	0.550678	1	0.0386037	1
