# Supplementary material for: Connecting Anxiety and Genomic Copy Number Variation: A Genome-Wide Analysis in CD-1 Mice
Source: PLoS One. 2015 May 26;10(5):e0128465. doi: 10.1371/journal.pone.0128465 (PMC4444327; doi:10.1371/journal.pone.0128465)
Supplement: S6 Table — (a) All probes of the expression microarray (12,171) that passed the filtering process are listed, including information about their genomic position. Up to three positions are shown if probes could be mapped to the reference genome multiple times. The p-values shown indicate differences in expression between HAB and LAB mice (significant if p < 0.05) in the respective brain area (CeA, BLA, Cg, PVN). The relative difference in expression is given as “fold change” (foldCh), with positive values indicating more expression in HAB mice. (b) All protein coding genes revealed to be differentially expressed between HAB and LAB mice by expression microarray are listed. The columns contain information about (from left to right): gene symbol, gene number (MGI), chromosome, gene start and end position, the number of microarray probes targeting the gene and showing significant expression differences (p < 0.05), and, finally, the number of probes showing more and less expression in HAB mice in the respective brain region (CeA, BLA, Cg and PVN). (XLS) [file pone.0128465.s012.xls]

## Sheet: a)
ProbeId	Chr	ProbeStart	ProbeEnd	ProbeOri	Chr_2nd	Start_2nd	End_2nd	Ori_2nd	Chr_3rd	Start_3rd	End_3rd	Ori_3rd	pVal_CeA	pVal_BLA	pVal_Cg	pVal_PVN	foldCh_CeA	foldCh_BLA	foldCh_Cg	foldCh_PVN
101940609	1	4766757	4766806	-									0.999952	0.999889	0.999971	0.999975	-1.22687	1.12124	-1.03299	-1.05101
104850050	1	4766759	4766808	-									0.999952	0.999889	0.999971	0.999975	-1.15756	1.06911	-1.05304	-1.01958
102320746	1	4771564	4771613	-									0.999952	0.999889	0.999971	0.999975	-1.08004	-1.07442	-1.05946	-1.12352
106200670	1	4835795	4835832	+									0.999952	0.999889	0.999971	0.999975	1.1947	-1.08926	-1.01303	1.00486
104610735	1	5581003	5581052	+									0.17577	0.999889	0.999971	0.908984	1.34467	-1.14647	-1.041	-1.20269
3780632	1	5592736	5592785	+									0.999952	0.999889	0.999971	0.999975	1.09167	-1.13074	1.12638	-1.15375
104850670	1	6238819	6238868	+									0.999952	0.999889	0.999971	0.999975	-1.21848	-1.07723	-1.04381	-1.13347
5720537	1	6850950	6850999	+									0.999952	0.999889	0.999971	0.999975	1.01911	-1.0922	-1.12211	-1.0045
1450603	1	7160807	7160856	+									0.999952	0.999889	0.999971	0.999975	1.04197	-1.17733	-1.00086	-1.0385
1770184	1	7162484	7162533	+									0.999952	0.999889	0.999971	0.999975	-1.09674	-1.32278	-1.20042	-1.36922
5670494	1	9616688	9616737	+									0.617462	0.999889	0.999971	0.999975	1.58879	1.1339	1.0266	-1.17853
105420735	1	9710513	9710562	-									0.999952	0.999889	0.999971	0.999975	-1.10832	1.00191	-1.00545	1.01054
100380722	1	9742588	9742637	+									0.999952	0.999889	0.999971	0.999975	-1.03239	1.08743	-1.00883	1.01674
103830603	1	9932710	9932759	-									0.999952	0.999889	0.999971	0.999975	1.02773	1.06983	-1.1055	-1.0019
5050215	1	10017215	10017264	-									0.999952	0.999889	0.999971	0.999975	-1.07831	1.10607	1.12363	-1.05946
1340722	1	10017269	10017318	-									0.999952	0.999889	0.999971	0.999975	-1.0674	1.073	1.12998	-1.0313
101770402	1	10027558	10027607	-									0.999952	0.999889	0.999971	0.999975	-1.10298	-1.13605	-1.26808	-1.08673
2360647	1	10126751	10126800	+									0.999952	0.999889	0.999971	0.999975	1.05524	1.04231	-1.06423	-1.04152
101660070	1	10128090	10128139	-									0.999952	0.999889	0.999971	0.999975	1.1234	1.10622	1.04048	-1.07849
104210372	1	10199322	10199371	-									0.999952	0.999889	0.999971	0.999975	1.06678	1.0183	1.04037	-1.04679
104920156	1	11588290	11588339	+									0.933396	0.999889	0.999971	0.999975	1.20034	1.25167	-1.07809	-1.00143
106290037	1	12851034	12851083	+									0.999952	0.999889	0.999971	0.877036	-1.09343	-1.02771	1.00563	-1.15206
2340441	1	13555051	13555100	-									0.999952	0.999889	0.999971	0.999975	-1.00958	-1.05492	-1.03178	-1.12762
5080139	1	14743468	14743517	-									0.999952	0.999889	0.999971	0.999975	-1.00449	1.01145	-1.05317	1.06305
103830593	1	15701461	15701510	+									0.999952	0.999889	0.999971	0.999975	1.0202	1.06964	1.01581	-1.05716
102570072	1	15811991	15812040	+									0.999952	0.999889	0.999971	0.999975	1.05128	-1.00803	-1.01916	-1.11924
3840647	1	16093277	16093326	-									0.999952	0.999889	0.999971	0.999975	-1.03218	1.11348	1.08447	-1.18805
6650070	1	16122265	16122314	+									0.999952	0.999889	0.999971	0.999975	1.008	-1.08586	-1.01629	-1.05934
106290403	1	16219102	16219151	-									0.999952	0.999889	0.999971	0.999975	1.08599	1.24311	1.25436	1.22928
2810411	1	16334528	16334577	-									0.999952	0.999889	0.999971	0.999975	-1.05524	1.02131	1.05294	-1.19277
1170619	1	16631999	16632048	-									0.999952	0.999889	0.999971	0.999975	1.12706	1.10297	1.16307	-1.00376
104730154	1	16985739	16985788	-									0.999952	0.999889	0.999971	0.999975	1.10252	-1.01315	-1.00558	1.04349
103610600	1	17148738	17148787	+									0.802344	0.999889	0.999971	0.999975	1.17373	-1.05582	-1.0384	-1.08743
60113	1	17153992	17154041	+									0.999952	0.999889	0.999971	0.999975	-1.07549	1.01701	1.12241	-1.15048
7050390	1	19156127	19156176	+									0.999952	0.25802	0.999971	0.999975	1.05349	-1.34649	1.05128	1.07894
106860538	1	20929297	20929346	+									0.999952	0.999889	0.999971	0.999975	-1.05841	-1.02307	-1.0764	1.01164
2470193	1	21255160	21255209	+									0.999952	0.999889	0.999971	0.671386	-1.08818	-1.0731	-1.05196	-1.24286
101780364	1	21942419	21942468	-									0.999952	0.999889	0.999971	0.999975	1.12906	-1.11446	1.02646	-1.00499
1190278	1	22277522	22277571	-									0.999952	0.999889	0.999971	0.999975	1.13233	-1.02617	-1.09914	-1.04686
100450180	1	23376607	23376653	-									0.24313	0.999889	0.999971	0.999975	1.38723	1.2716	1.28182	1.04342
103130348	1	23878282	23878331	-									0.999952	0.999889	0.999971	0.999975	-1.04345	1.27594	1.04563	1.03419
2360523	1	23898717	23898766	-									0.999952	0.999889	0.999971	0.999975	-1.08965	-1.14105	-1.03618	-1.03746
6770020	1	24003096	24003145	-									0.999952	0.999889	0.999971	0.999975	-1.07591	1.09631	1.09327	-1.21307
101190358	1	24058766	24058815	-									0.979974	0.999889	0.999971	0.999975	1.26601	-1.28329	1.12034	-1.03403
106370452	1	24619897	24619946	-									0.999952	0.999889	0.999971	0.999975	1.17098	1.21748	-1.16792	-1.10934
103140731	1	24620243	24620292	-									0.999952	0.999889	0.999971	0.999975	-1.12204	1.02258	-1.00984	1.14372
100070450	1	24620719	24620768	-									0.999952	0.999889	0.999971	0.999975	1.00423	-1.00429	1.00106	1.09726
104540722	1	24823043	24823092	+									0.999952	0.999889	0.999971	0.999975	-1.19765	1.06426	-1.10455	-1.05424
102190154	1	25124774	25124823	-									0.999952	0.999889	0.999971	0.999975	-1.00167	1.03507	1.03982	-1.00613
940692	1	25125033	25125082	-									0.999952	0.999889	0.999971	0.999975	1.02917	1.02761	1.04243	1.00001
104730022	1	25148457	25148506	-									0.999952	0.999889	0.999971	0.999975	1.1352	-1.15299	1.0247	-1.16635
106900731	1	25333526	25333575	-									0.999952	0.999889	0.999971	0.999975	1.05734	-1.14686	1.19648	-1.04426
100110687	1	25779479	25779528	-									0.999952	0.999889	0.999971	0.999975	1.11537	1.03311	1.05315	1.04897
3990044	1	30827577	30827626	+									0.999952	0.999889	0.999971	0.999975	1.10122	-1.19807	-1.02652	-1.21874
106130022	1	30859434	30859483	-									0.999952	0.999889	0.999971	0.999975	1.01037	1.10993	1.0031	-1.11495
106450450	1	30860125	30860174	-									0.999952	0.999889	0.999971	0.999975	1.07622	1.12198	1.09221	-1.05235
101240050	1	30997462	30997511	-									0.65541	0.999889	0.784583	0.176271	1.35462	1.3735	1.40515	1.56096
107100161	1	32303275	32303324	+									0.999952	0.999889	0.118186	0.889363	-1.01927	-1.20539	-1.30826	-1.16604
3520717	1	32714517	32714566	+									0.999952	0.999889	0.999971	0.999975	1.13501	-1.3181	-1.03959	-1.06247
2320671	1	33818685	33818734	-									0.999952	0.999889	0.999971	0.999975	1.10035	-1.0963	1.0271	-1.07582
1050037	1	33909014	33909063	-									0.999952	0.999889	0.999971	0.999975	1.00565	1.02212	1.00085	1.03654
2340577	1	34364332	34364381	+									0.999952	0.999889	0.999971	0.999975	-1.02957	-1.15544	-1.06733	1.02312
430026	1	34364785	34364834	+									0.999952	0.999889	0.999971	0.999975	1.02745	1.05475	1.04052	-1.03148
2760358	1	34493688	34493737	-									0.999952	0.999889	0.999971	0.999975	1.1685	1.08303	1.08909	1.00164
3140600	1	34500847	34500896	+									0.999952	0.999889	0.999971	0.923665	-1.05521	-1.09546	-1.11906	-1.23777
6550133	1	34501607	34501656	+									0.903344	0.999889	0.999971	0.999975	-1.25591	-1.01566	-1.16234	-1.21116
105340017	1	34647493	34647542	+									0.999952	0.999889	0.999971	0.999975	-1.11013	1.12879	1.10155	1.03216
610593	1	34869487	34869536	+									0.999952	0.999889	0.999971	0.999975	-1.02152	-1.00301	1.11246	-1.1485
3360746	1	34870482	34870531	-									0.999952	0.999889	0.999971	0.999975	-1.10987	-1.00276	1.03955	-1.01397
4010138	1	34935882	34935931	+									0.999952	0.999889	0.999971	0.999975	-1.07387	-1.04686	1.08161	-1.09876
4760373	1	36162889	36162938	+									0.999952	0.999889	0.999971	0.999975	-1.01783	-1.11884	-1.15099	1.07773
4230072	1	36200484	36200533	-									0.881271	0.999889	0.966687	0.176271	-1.19464	-1.12304	-1.24964	-1.3664
7380601	1	36392734	36392783	-									0.999952	0.999889	0.999971	0.999975	-1.00619	-1.00702	1.07249	-1.02758
6590100	1	36480052	36480101	-									0.701678	0.999889	0.999971	0.00118831	-1.21179	-1.16401	-1.16051	-1.61443
50079	1	36480312	36480361	-									0.199673	0.999889	0.742649	0.00151429	-1.57711	-1.40543	-1.44639	-2.15501
101990717	1	36500673	36500722	-									0.999952	0.999889	0.999971	0.999975	1.14043	-1.01587	1.07747	-1.2572
5390133	1	36595264	36595313	-									0.658218	0.999889	0.999971	0.999975	-1.2267	-1.05744	1.0531	-1.17922
105270739	1	36748437	36748486	+									0.999952	0.999889	0.999971	0.999975	-1.12531	1.06736	-1.07679	1.05099
6550670	1	36749315	36749364	+									0.999952	0.999889	0.999971	0.999975	-1.13806	1.04473	-1.03794	-1.01433
100130022	1	36755102	36755151	-									0.854371	0.999889	0.999971	0.999975	-1.40059	-1.13222	-1.28688	-1.23498
3870470	1	36756435	36756484	-									0.999952	0.999889	0.999971	0.999975	-1.10062	-1.00623	1.06603	-1.03962
4150520	1	36849983	36850032	-									0.999952	0.999889	0.999971	0.999975	-1.23715	-1.40058	1.00334	-1.14977
105570152	1	37197932	37197973	+									0.999952	0.999889	0.999971	0.999975	-1.00107	1.09075	1.16386	1.02516
6100519	1	37460425	37460474	+									0.999952	0.999889	0.999971	0.999975	-1.02778	-1.09322	-1.17965	1.00139
60100	1	37474265	37474314	-									0.999952	0.999889	0.999971	0.999975	-1.16849	-1.21904	-1.09103	-1.36168
101050161	1	37496433	37496482	-									0.999952	0.999889	0.999971	0.999975	-1.08752	1.05424	1.05545	1.05157
5690551	1	37668677	37668726	-									0.999952	0.999889	0.999971	0.999975	1.17667	1.07477	-1.05808	1.0923
4920093	1	37811730	37811779	-									0.999952	0.999889	0.999971	0.999975	1.0594	1.01382	1.02649	-1.0539
3990692	1	37937816	37937865	-									0.999952	0.999889	0.999971	0.999975	-1.02678	1.00853	1.03555	-1.09471
5700170	1	37954569	37954618	+									0.999952	0.999889	0.999971	0.999975	-1.08438	1.05234	-1.00891	-1.0965
102190735	1	38076087	38076136	+									0.999952	0.999889	0.999971	0.999975	-1.25197	-1.10294	1.00813	-1.10045
3360022	1	38109908	38109957	-									0.999952	0.999889	0.999971	0.999975	1.02334	1.11628	1.12733	-1.09345
100620750	1	38304914	38304963	-									0.999952	0.999889	0.999971	0.999975	1.06943	-1.02784	1.03879	-1.0195
100870068	1	38850723	38850772	-									0.999952	0.999889	0.999971	0.999975	-1.04176	1.07243	-1.10534	-1.10128
104810079	1	38852128	38852177	-									0.999952	0.999889	0.999971	0.999975	1.09997	-1.14457	-1.17637	-1.04556
520114	1	38920890	38920939	-									0.999952	0.999889	0.999971	0.999975	-1.03416	-1.12681	-1.02799	-1.17439
102320576	1	39419623	39419672	+									0.999952	0.105929	0.346107	0.999975	-1.07214	-1.5451	-1.36006	-1.16337
102690059	1	39424764	39424779	+	1	39424994	39425024	+					0.999952	0.999889	0.999971	0.999975	-1.19629	1.11297	-1.02104	1.05468
102690286	1	39424764	39424779	+	1	39424994	39425021	+					0.999952	0.999889	0.999971	0.999975	-1.28079	1.18023	-1.00205	1.04826
102900253	1	39424769	39424779	+	1	39424994	39425026	+					0.999952	0.999889	0.999971	0.999975	-1.32771	1.15632	1.00455	1.02099
105670576	1	39425030	39425075	+									0.999952	0.999889	0.999971	0.999975	-1.12019	1.08533	-1.02855	1.02094
103800484	1	39425082	39425100	+	1	39426859	39426889	+					0.999952	0.999889	0.999971	0.999975	-1.15202	1.05399	1.02018	1.03486
102190408	1	39425097	39425100	+	1	39426859	39426904	+					0.999952	0.999889	0.999971	0.999975	-1.14345	-1.03198	-1.02203	1.00492
5690685	1	39428635	39428684	+									0.63602	0.999889	0.999971	0.373119	-1.21599	-1.12601	-1.12866	-1.27739
4210315	1	39603104	39603153	+									0.999952	0.999889	0.999971	0.999975	-1.03499	1.00464	1.07808	-1.15755
5050309	1	39678179	39678228	-									0.977797	0.999889	0.545275	0.999975	-1.30376	1.16844	-1.53613	-1.12863
100610154	1	40082984	40083033	+									0.999952	0.999889	0.999971	0.999975	-1.0009	1.08119	1.02145	1.17311
104590092	1	40737457	40737506	-									0.877087	0.999889	0.999971	0.999975	1.18023	-1.12031	-1.0769	-1.11151
5910133	1	40825783	40825832	+									0.225267	0.999889	0.999971	0.999975	1.30463	-1.18698	-1.06333	1.03178
2470091	1	40829055	40829104	-									0.999952	0.999889	0.999971	0.999975	-1.05599	-1.04452	1.04063	-1.14742
3840725	1	42705167	42705216	-									0.999952	0.999889	0.999971	0.999975	1.03677	1.09053	1.05386	1.18347
5340019	1	42962333	42962382	+									0.999952	0.999889	0.999971	0.999975	1.08212	1.06529	1.07439	1.07079
101410039	1	43011468	43011517	+									0.999952	0.999889	0.999971	0.999975	-1.03258	1.01226	1.0787	-1.04642
2120088	1	43092081	43092130	+									0.999952	0.999889	0.999971	0.999975	-1.09522	1.02366	1.00585	-1.06156
1570035	1	43104155	43104204	-									0.999952	0.999889	0.999971	0.999975	-1.01298	1.03791	-1.04699	-1.06768
106110487	1	43150562	43150611	+									0.999952	0.999889	0.999971	0.999975	1.02332	1.0132	-1.04874	-1.08425
2370408	1	43172576	43172625	+									0.999952	0.999889	0.999971	0.999975	-1.14163	-1.17221	1.01153	-1.13808
1400008	1	43180290	43180339	-									0.270275	0.999889	0.999971	0.999975	1.36705	1.10154	1.03858	-1.04881
2510010	1	43627277	43627326	+									0.999952	0.999889	0.999971	0.999975	1.05305	1.05499	-1.0151	-1.16203
3130368	1	43799149	43799198	+									0.999952	0.999889	0.999971	0.0128222	-1.0504	-1.01001	1.18296	1.73702
3850093	1	44059756	44059805	+									0.999952	0.999889	0.999971	0.999975	1.0376	-1.2012	1.02594	-1.08032
3450465	1	44144707	44144756	-									0.999952	0.999889	0.999971	0.999975	1.01842	-1.08401	-1.02171	-1.01593
1570280	1	44164645	44164694	-									0.999952	0.999889	0.999971	0.999975	-1.14645	-1.04801	-1.0383	-1.14294
770025	1	44237819	44237868	+									4.05e-07	0.346844	8.14e-07	1.24e-09	2.34666	1.46738	2.28995	2.82174
106130368	1	45879317	45879366	+									0.999952	0.999889	0.999971	0.999975	-1.00561	-1.03222	-1.02214	-1.09289
2370286	1	45965105	45965154	-									0.999952	0.999889	0.999971	0.999975	1.0602	1.1715	1.14789	-1.06394
4150347	1	46864680	46864729	-									0.999952	0.999889	0.999971	0.999975	1.14382	1.1116	1.00101	-1.01922
3360292	1	51359612	51359661	+									0.999952	0.999889	0.999971	0.999975	1.10859	1.19282	1.04409	1.03127
6590553	1	52217485	52217534	+									0.999952	0.999889	0.999971	0.999975	1.06563	-1.08403	-1.09946	-1.04598
105550079	1	52221949	52221998	-									0.999952	0.999889	0.999971	0.999975	1.01672	-1.00236	-1.09202	1.03213
101580047	1	52242884	52242933	-									0.999952	0.999889	0.999971	0.999975	1.05063	1.0622	1.00835	1.091
3390736	1	52514985	52515034	-									0.999952	0.999889	0.999971	0.999975	-1.00759	1.04046	1.04855	1.06069
106760497	1	52708447	52708496	+									0.999952	0.999889	0.999971	0.999975	1.09684	-1.18358	-1.0221	-1.09845
106370161	1	52713235	52713284	-									0.999952	0.999889	0.999971	0.999975	-1.16958	1.01838	1.03206	-1.01512
1190273	1	52715082	52715131	-									0.999952	0.999889	0.999971	0.999975	1.04607	-1.06936	1.19712	-1.12812
670368	1	52846656	52846705	-									0.999952	0.999889	0.999971	0.999975	-1.1383	-1.03619	1.08124	-1.0829
2570088	1	52982200	52982249	-									0.999952	0.999889	0.999971	0.999975	-1.02817	-1.06861	1.22474	-1.0558
460731	1	53377039	53377088	+									0.999952	0.999889	0.999971	0.999975	1.02666	-1.02169	1.06912	-1.05824
101990670	1	53998484	53998533	-									0.999952	0.999889	0.999971	0.999975	-1.04283	1.00607	1.07672	1.07969
2450066	1	54454572	54454621	-									0.999952	0.999889	0.999971	0.999975	1.01243	1.13584	1.08084	1.03272
7000632	1	55042173	55042222	-									0.999952	0.999889	0.999971	0.999975	1.0765	1.06137	-1.005	1.01905
2320333	1	55128727	55128776	+									0.672042	0.999889	0.587382	0.214976	-1.32733	-1.27368	-1.41134	-1.50119
2030451	1	55134942	55134991	-									0.999952	0.999889	0.999971	0.999975	-1.06665	-1.24871	-1.0668	-1.17586
3170438	1	55147577	55147626	+									0.999952	0.999889	0.999971	0.999975	1.02107	1.04681	-1.0259	-1.05584
105910064	1	55227136	55227185	-									0.999952	0.999889	0.999971	0.999975	1.1493	1.13708	1.11316	1.0949
106130056	1	55228672	55228721	-									0.999952	0.999889	0.999971	0.999975	1.13626	1.29777	1.20396	1.10826
101980091	1	57031848	57031897	+									0.999952	0.999889	0.999971	0.999975	1.11245	-1.04199	-1.02804	-1.06638
3390136	1	57470155	57470204	+									0.999952	0.999889	0.999971	0.999975	-1.01551	-1.01271	-1.0053	-1.03785
1570086	1	58005115	58005164	+									0.949735	0.999889	0.999971	0.999975	-1.13457	-1.01762	1.00766	-1.11218
110082	1	58163173	58163222	+									0.515679	0.549563	0.999971	0.00725154	-1.24069	-1.3393	-1.17237	-1.50907
4180592	1	58257032	58257081	+									0.999952	0.999889	0.999971	0.999975	1.05361	-1.01889	-1.04526	-1.01575
460270	1	58463103	58463152	+									0.999952	0.999889	0.999971	0.999975	1.16116	-1.04628	1.07558	1.12012
104810484	1	58464125	58464174	+									0.593365	0.999889	0.999971	0.999975	-1.25592	1.01424	-1.12107	1.00972
1780551	1	58468983	58469032	-									0.999952	0.999889	0.999971	0.999975	1.00497	-1.08811	-1.12981	-1.01336
2340347	1	58469127	58469176	-									0.999952	0.999889	0.999971	0.999975	1.02129	1.03278	1.01053	-1.03571
2100102	1	58476980	58477029	-									0.999952	0.999889	0.999971	0.999975	1.06209	1.18401	-1.083	1.0083
630037	1	58487939	58487988	-									0.999952	0.999889	0.999971	0.999975	1.07853	1.18946	1.11618	1.05312
102340390	1	58579905	58579954	-									0.977797	0.999889	0.999971	0.999975	-1.32296	-1.11645	-1.30368	-1.1977
6660315	1	58584380	58584429	-									0.999952	0.999889	0.999971	0.999975	1.05716	-1.01911	1.00639	-1.29572
1230068	1	58622730	58622779	-									0.999952	0.999889	0.999971	0.999975	-1.17351	-1.07217	-1.00757	-1.19401
4610687	1	58648036	58648085	+									0.999952	0.999889	0.999971	0.999975	-1.06421	1.03851	1.02217	-1.04655
104070056	1	58770649	58770698	+									0.999952	0.999889	0.999971	0.999975	-1.00029	1.01972	-1.01814	-1.06054
430736	1	58957604	58957653	-									0.999952	0.999889	0.999971	0.999975	-1.06703	-1.01281	-1.06963	-1.05999
6450128	1	59051615	59051664	+									0.999952	0.999889	0.999971	0.999975	-1.00216	1.05907	1.08922	-1.02835
103840750	1	59162452	59162501	-									0.000539011	0.0921881	0.00393595	0.000690059	-2.00932	-1.71153	-1.8479	-1.99315
3130546	1	59219894	59219943	-									0.999952	0.999889	0.999971	0.999975	1.02992	1.08832	1.05008	1.02756
6400070	1	59220920	59220969	-									0.999952	0.999889	0.999971	0.999975	1.03941	-1.05365	1.04711	-1.00664
6380195	1	59696304	59696353	-									0.999952	0.999889	0.999971	0.999975	-1.05773	-1.01338	-1.05881	-1.07832
1990364	1	59727601	59727650	-									0.999952	0.999889	0.999971	0.999975	-1.08033	-1.09617	-1.06492	-1.14514
580731	1	59765848	59765897	+									0.880681	0.999889	0.999971	0.809298	-1.34179	1.00694	-1.00666	-1.4117
104920333	1	59819156	59819205	-									0.999952	0.999889	0.999971	0.999975	-1.05692	1.01606	-1.00689	-1.05156
106370066	1	59934165	59934214	+									0.999952	0.999889	0.999971	0.999975	1.034	1.10327	-1.06762	-1.04655
102100341	1	60042076	60042125	+									0.999952	0.999889	0.999971	0.999975	-1.11724	-1.00594	-1.04704	-1.10317
4850181	1	60045940	60045989	-									0.999952	0.999889	0.999971	0.999975	1.03025	-1.10986	-1.07484	-1.03232
106020168	1	60542020	60542069	-									0.999952	0.999889	0.999971	0.999975	1.16104	1.17629	1.07168	-1.02005
104150372	1	62864886	62864935	+									0.999952	0.999889	0.999971	0.999975	-1.16584	1.02693	1.08897	-1.1086
5900180	1	63112300	63112349	-									0.380242	0.999889	0.999971	0.999975	-1.5612	-1.1651	-1.05152	-1.22747
4850400	1	63223714	63223763	+									0.999952	0.999889	0.999971	0.999975	-1.04406	-1.04401	1.10227	1.05576
6130161	1	63225069	63225118	+									0.999952	0.999889	0.999971	0.999975	-1.03726	-1.22905	-1.0293	-1.04287
103710592	1	63360506	63360555	+									0.999952	0.999889	0.999971	0.999975	-1.10718	-1.08945	1.02215	-1.21731
2450156	1	63631948	63631997	+									0.999952	0.999889	0.999971	0.830147	-1.07515	1.01913	1.0329	-1.26071
460091	1	63639352	63639401	+									0.999952	0.999889	0.999971	0.75641	-1.14091	1.03048	-1.0031	-1.3104
7000484	1	63642598	63642647	+									0.999952	0.999889	0.999971	0.999975	-1.04988	1.09461	1.07564	-1.08676
940050	1	63745425	63745474	-									0.999952	0.999889	0.999971	0.999975	-1.09006	-1.0844	-1.00724	-1.07829
101190719	1	64079594	64079643	-									0.999952	0.999889	0.999971	0.999975	1.20096	1.15743	1.08971	-1.09012
102340592	1	64080213	64080262	-									0.999952	0.999889	0.999971	0.999975	1.08589	1.00587	1.00689	-1.14294
50390	1	64125333	64125382	-									0.999952	0.999889	0.999971	0.999975	1.26534	1.14986	1.33968	-1.11589
105550390	1	64160850	64160899	-									0.999952	0.999889	0.999971	0.999975	1.00464	1.10326	1.03039	1.03895
2230358	1	64622849	64622898	+									0.607515	0.999889	0.999971	0.999975	-1.3353	-1.2881	-1.02278	-1.17362
106130086	1	64771906	64771955	+									0.999952	0.999889	0.999971	0.999975	-1.03077	1.13566	-1.06259	1.01869
620296	1	64777519	64777568	-									0.999952	0.999889	0.999971	0.999975	1.04831	-1.04682	1.00598	1.05473
103990138	1	64835898	64835947	-									0.999952	0.999889	0.999971	0.999975	1.03252	1.05309	-1.02608	-1.03365
104880288	1	65205335	65205384	-									0.999952	0.999889	0.999971	0.999975	-1.06032	1.06188	1.08539	1.06538
1990021	1	65205989	65206038	-									0.999952	0.999889	0.999971	0.999975	1.03967	-1.03759	1.10552	-1.03172
101410300	1	66450504	66450553	+									0.999952	0.999889	0.999971	0.999975	-1.37673	-1.0934	1.05975	-1.34697
103830193	1	66454490	66454539	+									0.999952	0.999889	0.999971	0.999975	1.15071	-1.07265	1.14452	-1.1852
1500026	1	66462660	66462709	+									0.0970615	0.999889	0.999971	0.999975	-2.86645	-1.78206	1.07792	-1.6825
102900458	1	66720767	66720816	+									0.999952	0.999889	0.999971	0.999975	1.22096	-1.14239	-1.14638	-1.06638
104560136	1	66738546	66738595	+									0.999952	0.999889	0.999971	0.999975	1.01402	-1.07569	1.03156	-1.16205
2650092	1	66742961	66743010	+									0.999952	0.999889	0.999971	0.999975	1.14347	1.1258	1.24338	-1.00253
1770079	1	67047147	67047196	-									0.698468	0.999889	0.999971	0.999975	1.26263	1.08201	1.07547	-1.01098
6420670	1	67053511	67053560	-									0.999952	0.999889	0.999971	0.999975	1.00037	1.05213	1.0143	1.00264
730685	1	70778628	70778677	+									0.999952	0.999889	0.999971	0.814535	-1.06936	-1.11379	1.06932	-1.22691
2350717	1	72349458	72349507	+									0.999952	0.999889	0.999971	0.999975	-1.10426	-1.04454	1.00364	-1.19494
102450619	1	72473836	72473885	-									0.999952	0.999889	0.999971	0.999975	-1.14558	1.0069	-1.13954	-1.03761
7040717	1	72758298	72758347	+									0.999952	0.999889	0.999971	0.999975	-1.06706	-1.03373	1.04733	-1.02515
5220563	1	72871436	72871485	+									0.999952	0.999889	0.000508938	0.999975	1.04315	-1.1608	-1.54995	1.02062
2360592	1	72904658	72904706	-									0.999952	0.999889	0.999971	0.999975	-1.02739	1.02678	1.19267	1.00297
104560022	1	72904829	72904878	-									0.999952	0.999889	0.999971	0.999975	-1.08212	1.05935	-1.00274	1.05103
6940458	1	73959629	73959678	-									0.999952	0.999889	0.999971	4.83e-09	-1.04222	1.07156	1.00799	-3.19356
6620102	1	74194572	74194621	+									0.999952	0.999889	0.999971	0.00726772	-1.00842	-1.03228	1.06027	-1.42919
6020484	1	74314484	74314533	+									0.999952	0.999889	0.999971	0.999975	1.13818	-1.13862	-1.08711	-1.08327
2640059	1	74326514	74326563	-									0.999952	0.999889	0.999971	0.999975	-1.07996	-1.03169	-1.07873	-1.06405
3520592	1	74400062	74400111	+									0.772596	0.999889	0.999971	0.999975	-1.34976	-1.3328	-1.36241	-1.24904
940286	1	74432558	74432607	+									0.999952	0.999889	0.999971	0.999975	-1.14428	-1.13142	-1.1505	-1.19072
6940731	1	74443117	74443166	+									0.999952	0.999889	0.999971	0.999975	1.01697	1.12687	1.05732	-1.05226
105960452	1	74482429	74482478	-									0.999952	0.999889	0.999971	0.999975	-1.01836	1.00434	-1.00599	-1.02404
102480458	1	74484200	74484249	-									0.999952	0.999889	0.999971	0.999975	1.03294	-1.11974	-1.03668	-1.05132
1850139	1	74577091	74577140	+									0.999952	0.999889	0.999971	0.999975	-1.09209	-1.01881	1.08499	-1.08516
5360102	1	74638608	74638657	+									0.999952	0.999889	0.999971	0.999975	-1.11626	1.04457	-1.03211	-1.16817
2120632	1	74640580	74640629	-									0.999952	0.999889	0.999971	0.276893	-1.19201	1.17383	1.01026	-1.70252
6760563	1	74641155	74641204	-									0.999952	0.999889	0.999971	0.263063	-1.08905	1.01774	-1.10106	-1.59998
106200170	1	74683293	74683342	+									0.999952	0.999889	0.999971	0.519046	-1.13221	-1.00916	-1.12956	-1.23459
102510463	1	74747952	74748001	+									0.999952	0.999889	0.999971	0.999975	1.04979	-1.0732	-1.05818	-1.03556
2190619	1	74948950	74948999	-									0.999952	0.999889	0.999971	0.999975	-1.06023	-1.06945	-1.04095	-1.02346
5820376	1	75144408	75144457	+									0.999952	0.999889	0.999971	0.999975	1.0669	-1.17846	-1.03393	-1.13189
5050156	1	75166136	75166185	+									0.999952	0.999889	0.999971	0.999975	-1.04753	-1.00403	-1.10379	-1.07053
6650047	1	75167565	75167614	+									0.999952	0.999889	0.999971	0.999975	-1.06397	-1.03331	-1.04226	-1.02947
4040047	1	75168025	75168074	+									0.999952	0.999889	0.999971	0.999975	-1.10086	1.05466	-1.00874	1.00927
6350138	1	75168422	75168471	-									0.999952	0.999889	0.999971	0.999975	-1.09447	-1.08043	1.19031	-1.12071
100540286	1	75177673	75177722	-									0.999952	0.999889	0.999971	0.999975	-1.13159	-1.00853	-1.08813	-1.07938
50121	1	75195719	75195768	+									0.999952	0.999889	0.999971	0.999975	-1.15857	-1.05574	-1.10609	-1.06417
3610750	1	75195813	75195862	+									0.999952	0.999889	0.999971	0.999975	-1.10559	-1.0925	-1.01083	-1.12162
940239	1	75211651	75211700	-									0.999952	0.999889	0.999971	0.999975	-1.08425	1.02881	1.00934	-1.01643
450301	1	75242154	75242203	+									0.999952	0.999889	0.999971	0.999975	-1.10557	1.03389	1.04475	-1.04638
5900577	1	75243762	75243811	-									0.850586	0.999889	0.999971	0.999975	-1.21139	-1.04949	-1.03234	1.07328
5220594	1	75268803	75268852	-									0.566763	0.999889	0.999971	0.999975	-1.22969	-1.06189	1.02608	-1.12415
520450	1	75433535	75433584	+									0.999952	0.999889	0.999971	0.999975	-1.03681	-1.08461	-1.09338	1.03554
3120497	1	75439537	75439586	+									0.999952	0.999889	0.999971	0.999975	-1.11436	-1.02827	-1.00378	-1.07437
2350520	1	75471217	75471266	-									0.999952	0.999889	0.999971	0.999975	-1.07212	-1.01163	1.01617	-1.02782
6560379	1	75481774	75481823	+									0.999952	0.999889	0.999971	0.999975	1.12873	-1.03824	1.01923	1.13201
106200097	1	75482465	75482514	-									0.999952	0.999889	0.999971	0.142293	-1.04987	-1.03281	-1.12277	-1.33269
6100102	1	75506386	75506435	+									0.999952	0.999889	0.999971	0.999975	-1.06185	-1.11368	1.00807	-1.05243
6380347	1	75545587	75545636	+									0.76587	0.999889	0.999971	0.999975	-1.42286	-1.12297	1.05284	-1.00814
360603	1	75554375	75554375	+	1	75555388	75555436	+					0.999952	0.999889	0.999971	0.999975	-1.04473	1.08296	1.06653	-1.05922
103440097	1	75557748	75557797	+									0.999952	0.999889	0.999971	0.999975	1.02741	1.0482	-1.0377	1.00725
460750	1	77364650	77364699	-									0.999952	0.999889	0.999971	0.999975	1.11227	-1.04586	1.02945	-1.02824
2030079	1	78440265	78440314	-									0.999952	0.999889	0.999971	0.999975	-1.23503	-1.03429	-1.07582	-1.18379
5670438	1	79431994	79432043	-									0.999952	0.999889	0.999971	0.999975	-1.32866	-1.54353	-1.37347	-1.14598
101170044	1	79701979	79702028	-									0.643898	0.999889	0.999971	0.999975	-1.37831	-1.29799	-1.05116	-1.13854
3940315	1	79776174	79776223	+									0.999952	0.999889	0.999971	0.999975	-1.05766	-1.01227	1.02236	-1.0864
2810390	1	79790837	79790886	-									0.999952	0.999889	0.999971	0.999975	-1.03336	-1.11365	1.00301	1.03735
101940008	1	79791276	79791320	-									0.999952	0.999889	0.999971	0.999975	-1.06774	-1.00886	-1.03679	1.0942
100450403	1	79919524	79919573	-									0.999952	0.999889	0.999971	0.999975	1.11074	-1.00186	-1.16686	-1.02896
106940603	1	80262477	80262526	-									0.999952	0.999889	0.999971	0.999975	-1.00555	-1.00304	-1.07003	-1.12189
1850520	1	80263578	80263627	-									0.999952	0.999889	0.999971	0.999975	-1.10947	1.09223	1.0416	-1.18025
6770025	1	80498278	80498327	-									0.999952	0.999889	0.999971	0.999975	1.04715	-1.11789	1.12289	1.01094
5890402	1	80500511	80500560	-									0.999952	0.999889	0.999971	0.999975	-1.26853	-1.14619	1.10571	-1.1263
106040170	1	80579933	80579982	-									0.999952	0.999889	0.999971	0.999975	1.20114	-1.05458	1.06009	1.14063
100450332	1	80615077	80615126	-									0.999952	0.999889	0.999971	0.999975	-1.04406	-1.0754	-1.02231	1.06303
106350008	1	80743804	80743853	-									0.999952	0.999889	0.999971	0.999975	1.23959	-1.04867	1.0691	-1.04399
102470139	1	82230182	82230231	-									0.999952	0.999889	0.999971	0.999975	-1.04389	1.04415	1.00002	1.08454
870619	1	82441557	82441606	+									0.999952	0.999889	0.999971	0.999975	-1.10041	1.0896	1.09365	1.12288
1410301	1	82738415	82738464	+									0.999952	0.999889	0.999971	0.999975	1.00759	-1.01129	1.11593	-1.04086
1660397	1	82892648	82892697	+									0.999952	0.999889	0.999971	0.999975	1.06524	1.00406	1.00015	1.01631
106420463	1	82897362	82897411	+									0.999952	0.999889	0.999971	0.999975	-1.05361	-1.01426	-1.13394	-1.07737
100450519	1	83009537	83009586	-									0.999952	0.999889	0.999971	0.999975	-1.03638	1.0859	-1.0354	1.09696
100510397	1	83252668	83252717	-									0.999952	0.999889	0.999971	0.999975	-1.04687	-1.01882	1.08831	-1.12493
840181	1	84033176	84033225	-									0.485251	0.999889	0.999971	0.999975	-1.21298	-1.07472	-1.01944	1.02901
3610170	1	84366548	84366597	-									0.999952	0.999889	0.999971	0.999975	-1.04279	1.04701	1.01368	-1.00344
104540438	1	84718110	84718159	-									0.999952	0.999889	0.999971	0.999975	-1.00964	1.04794	1.06018	-1.01963
5720446	1	84720883	84720932	-									0.999952	0.999889	0.999971	0.999975	1.01946	-1.06237	1.01295	-1.02196
130154	1	84721229	84721278	-									0.999952	0.999889	0.999971	0.999975	-1.02563	-1.07095	1.03599	-1.10815
5080288	1	84721231	84721280	-									0.999952	0.999889	0.999971	0.999975	1.00356	-1.05379	1.05664	-1.10539
1410086	1	84896746	84896795	+									0.999952	0.999889	0.999971	0.999975	-1.05972	1.02416	1.04058	-1.00534
780647	1	87805141	87805190	+									0.999952	0.999889	0.999971	0.999975	1.05253	1.0126	1.09809	-1.05651
3800091	1	87828205	87828254	+									0.999952	0.999889	0.999971	0.999975	1.09276	1.05336	1.08907	-1.14011
105550167	1	87951731	87951780	+									0.999952	0.999889	0.999971	0.999975	-1.07682	1.10169	1.11202	1.12239
102470156	1	88024814	88024863	+									0.999952	0.999889	0.999971	0.999975	-1.00624	1.05748	-1.02097	1.00733
106620411	1	88027234	88027283	+									0.999952	0.999889	0.999971	0.999975	-1.16291	1.02098	-1.02181	-1.04843
103800465	1	88066695	88066744	+									0.301374	0.999889	0.999971	0.999975	1.2974	-1.07277	1.05317	1.02726
5420471	1	88174077	88174126	+									0.999952	0.999889	0.999971	0.999975	1.00937	-1.00722	1.02342	-1.14316
3440707	1	88174315	88174364	+									0.999952	0.999889	0.999971	0.999975	-1.05492	-1.05026	-1.06174	-1.14251
4540279	1	88246234	88246283	-									0.880681	0.999889	0.999971	0.923665	-1.17603	1.02313	1.04136	-1.18847
2360463	1	88246258	88246307	-									0.999952	0.999889	0.999971	0.999975	1.03826	-1.2157	1.14229	-1.19961
101850113	1	88423502	88423525	+	1	88425748	88425763	+					0.999952	0.999889	0.999971	0.999975	-1.07039	-1.22197	-1.07318	-1.1275
5570148	1	88427080	88427129	+									0.999952	0.999889	0.999971	0.999975	1.01942	-1.05142	-1.20251	-1.13055
3130537	1	88440063	88440112	-									0.999952	0.999889	0.999971	0.999975	1.17326	1.03471	1.04203	1.04004
3390014	1	88442299	88442348	-									0.999952	0.999889	0.999971	0.999975	1.06715	-1.02708	1.05043	-1.00765
4280022	1	88502507	88502556	+									0.999952	0.999889	0.999971	0.999975	-1.07551	1.00798	1.05483	-1.18454
2970484	1	88502719	88502768	+									0.964264	0.999889	0.999971	0.999975	1.19582	-1.15155	-1.03152	-1.03358
4760711	1	88946340	88946389	+									0.999952	0.999889	0.999971	0.999975	1.03005	1.08682	1.1311	1.12116
5700504	1	89044556	89044605	-									0.636908	0.999889	0.999971	0.999975	-1.3108	-1.33531	-1.1879	-1.07082
5910609	1	89122726	89122775	+									0.999952	0.999889	0.999971	0.999975	-1.064	1.04961	-1.05105	-1.04829
2760072	1	89134809	89134858	+									0.999952	0.999889	0.999971	0.999975	-1.10631	1.01743	-1.16428	-1.03472
4070358	1	89207047	89207096	+									0.326388	0.999889	0.999971	0.999975	-1.3303	1.03486	-1.09377	1.13185
100050110	1	89346797	89346846	+									0.999952	0.999889	0.999971	0.999975	1.02871	1.01566	-1.04304	-1.08218
7100292	1	89371963	89372012	+									0.145335	0.999889	0.406553	0.635009	1.33549	-1.0023	1.28781	1.23266
3190538	1	89373482	89373531	-									0.47541	0.999889	0.999971	0.999975	1.24931	1.06221	1.09886	-1.06478
6510711	1	89494310	89494359	+									0.321073	0.999889	0.999971	0.999975	1.29147	1.20836	1.08497	1.04728
5390292	1	89688708	89688757	+									0.999952	0.999889	0.999971	0.999975	-1.09317	1.01155	-1.00693	1.02887
6550603	1	89741597	89741646	+									0.961374	0.999889	0.999971	0.999975	1.15354	1.04196	-1.03143	1.06334
106620008	1	89840957	89841006	+									0.999952	0.999889	0.999971	0.999975	-1.05168	1.01698	-1.17768	-1.11378
5290195	1	89848915	89848946	-	1	89848266	89848283	-					0.999952	0.999889	0.999971	0.999975	-1.07362	-1.07137	1.1027	-1.13948
1190279	1	90595196	90595245	-									0.999952	0.999889	0.999971	0.999975	-1.12878	-1.0478	-1.03817	-1.12293
104480092	1	91355869	91355918	+									0.999952	0.999889	0.999971	0.999975	1.0801	1.05849	1.22617	-1.07334
4210053	1	91786460	91786507	+									0.999952	0.999889	0.999971	0.999975	1.07401	-1.04222	1.05435	-1.1131
3940736	1	91824627	91824676	-									0.999952	0.999889	0.999971	0.286587	1.02652	1.03859	1.03543	1.51752
101780093	1	92000424	92000473	-									0.999952	0.999889	0.999971	0.999975	1.04046	1.02677	-1.12175	-1.02799
2810541	1	92509380	92509429	+									0.999952	0.999889	0.999971	0.999975	-1.05949	-1.13148	-1.01159	-1.04774
2640717	1	92663606	92663655	-									9.05e-06	0.999889	0.999971	2.18e-09	-2.0746	-1.30414	-1.26859	-2.71404
870259	1	93025013	93025062	+									0.999952	0.999889	0.999971	0.999975	1.014	1.03253	1.03944	-1.14606
2320168	1	93119931	93119980	+									0.999952	0.999889	0.999971	0.999975	-1.03058	1.12756	1.04153	-1.05265
6980041	1	93121430	93121479	+									0.999952	0.999889	0.999971	0.950734	-1.08401	1.12524	1.0041	-1.17667
5890687	1	93182389	93182438	+									0.999952	0.999889	0.999971	0.999975	-1.12276	1.06471	-1.11388	-1.02764
730497	1	93217320	93217369	+									0.256406	0.999889	0.999971	0.999975	-1.27454	1.03605	1.03298	1.00113
6770136	1	93272918	93272967	-									0.999952	0.999889	0.999971	0.999975	-1.16849	-1.05011	-1.07423	-1.16085
540411	1	93308099	93308148	-									0.999952	0.999889	0.999971	0.977041	-1.09241	1.04618	1.18276	-1.16544
3390593	1	93312648	93312697	-									0.999952	0.999889	0.999971	0.999975	1.10721	1.04077	-1.0224	-1.18357
102060131	1	93451611	93451660	+									0.999952	0.999889	0.999971	0.999975	1.04759	1.10256	-1.03713	-1.08129
105340152	1	93455865	93455914	+									0.999952	0.999889	0.999971	0.999975	-1.02262	1.14098	-1.01048	-1.10132
460079	1	93829688	93829737	-									0.999952	0.999889	0.999971	0.999975	-1.00802	-1.05868	1.01444	-1.26274
105390369	1	94335753	94335802	-									0.999952	0.999889	0.999971	0.999975	-1.1338	-1.00409	-1.06437	-1.12085
5570347	1	94336338	94336387	-									0.999952	0.999889	0.999971	0.999975	-1.02135	-1.09631	1.0173	-1.11047
4150136	1	94533848	94533897	-									0.940679	0.999889	0.999971	0.999975	-1.1939	-1.00194	-1.04319	-1.03937
2640593	1	94756686	94756735	+									0.999952	0.999889	0.999971	0.999975	1.1677	1.06635	1.09591	1.12295
4480088	1	94804345	94804394	+									0.999952	0.999889	0.999971	0.999975	-1.02497	-1.23962	1.1081	-1.02616
5290465	1	94817050	94817099	+									0.999952	0.999889	0.999971	0.999975	1.06314	1.08119	-1.00803	-1.05538
100050037	1	94837126	94837175	+									0.997447	0.999889	0.999971	0.999975	-1.20613	-1.02796	-1.06047	-1.07783
103850671	1	94837472	94837521	+									0.869916	0.999889	0.999971	0.999975	-1.24841	-1.11708	-1.11233	-1.14696
3940133	1	94844288	94844337	+									0.999952	0.999889	0.999971	0.999975	-1.04518	1.02635	1.01957	-1.03963
102690674	1	94912415	94912464	-									0.999952	0.999889	0.999971	0.999975	-1.07876	1.0676	1.02694	1.1087
450632	1	94915531	94915580	-									0.929014	0.999889	0.999971	0.999975	-1.16531	1.06224	1.00441	-1.04904
6860082	1	95197555	95197604	+									0.964872	0.999889	0.999971	0.999975	1.21915	1.10472	-1.05695	-1.15491
1570333	1	95197825	95197874	-									0.999952	0.999889	0.999971	0.999975	-1.06856	1.06263	-1.02321	-1.12844
4670037	1	95518283	95518332	+									0.999952	0.999889	0.999971	0.999975	1.09879	1.04797	-1.0331	-1.02511
1500193	1	95520045	95520094	-									0.999952	0.999889	0.999971	0.999975	1.06728	-1.09191	-1.00497	-1.00729
1090519	1	95521623	95521672	-									0.999952	0.999889	0.999971	0.999975	1.07366	-1.03253	-1.00888	1.07903
1170373	1	95592254	95592303	+									0.999952	0.999889	0.999971	0.999975	1.03349	-1.02701	-1.07789	1.08671
7040181	1	95602012	95602061	-									0.999952	0.999889	0.999971	0.999975	1.10409	-1.05008	-1.02315	1.03778
2570014	1	95685886	95685935	+									0.999952	0.999889	0.999971	0.855727	-1.03718	-1.01973	-1.01487	-1.22279
103710433	1	95689445	95689494	-									0.999952	0.999889	0.999971	0.981702	-1.02248	1.00347	-1.1082	-1.28118
2340377	1	95697199	95697248	-									0.999952	0.999889	0.999971	0.999975	1.13414	1.01403	1.04245	1.10508
3060215	1	97484364	97484413	-									0.999952	0.999889	0.999971	0.999975	1.05071	-1.00715	1.06278	-1.04036
104760605	1	99674090	99674139	+									0.0644056	0.165272	0.0107075	0.0492777	2.05581	2.15937	2.39643	2.10726
5050563	1	102382415	102382464	+									0.999952	0.999889	0.999971	0.999975	-1.06984	-1.23373	1.00181	-1.07214
4200546	1	107176602	107176651	-									0.999952	0.999889	0.999971	0.999975	-1.02275	-1.06698	1.25483	-1.16896
100610056	1	107651349	107651398	+									0.999952	0.999889	0.999971	0.999975	-1.07635	1.01468	-1.00009	-1.06811
103840278	1	108183824	108183873	+									0.977797	0.999889	0.999971	0.999975	-1.21426	1.03154	1.20299	1.02357
3440563	1	108290520	108290569	+									0.999952	0.999889	0.999971	0.999975	-1.1205	1.04252	-1.05958	-1.02934
3800044	1	108434925	108434974	-									0.999952	0.999889	0.999971	0.999975	1.00053	-1.04426	-1.10315	-1.18907
5690068	1	108435430	108435479	-									0.999952	0.999889	0.999971	0.557241	1.05539	-1.02401	-1.03056	-1.26885
4810037	1	108608812	108608861	-									0.999952	0.999889	0.999971	0.999975	-1.05188	-1.01518	-1.01147	-1.02162
840020	1	108620613	108620662	-									0.999952	0.999889	0.999971	0.999975	1.1427	1.10734	1.20981	1.08465
6620722	1	112035299	112035348	+									0.999952	0.234504	0.999971	0.999975	1.14205	1.46534	1.00774	1.06357
1740037	1	113755879	113755928	-									0.999952	0.999889	0.999971	0.999975	-1.02464	-1.01887	1.03571	1.07712
6840050	1	120201293	120201342	-									0.999952	0.999889	0.999971	0.999975	1.00785	-1.14793	1.24902	1.02206
3060132	1	120229788	120229837	+									0.999952	0.999889	0.999971	0.999975	1.01509	1.02791	1.08155	-1.0912
103290563	1	120230244	120230293	+									0.999952	0.999889	0.999971	0.999975	1.12469	1.19483	1.05386	1.0994
102810039	1	120355742	120355791	-									0.999952	0.999889	0.999971	0.999975	-1.34918	-1.17506	-1.04325	-1.26953
105080722	1	120399619	120399668	+									0.999952	0.999889	0.999971	0.999975	-1.01409	-1.0527	-1.02708	-1.07649
104850041	1	120403789	120403838	+									0.760818	0.999889	0.999971	0.999975	1.26305	1.0321	1.15263	-1.07256
5340497	1	120581559	120581608	+									0.999952	0.999889	0.999971	0.999975	-1.05329	-1.01465	1.044	-1.14664
105910687	1	120730894	120730943	-									0.485251	0.999889	0.779878	0.999975	-1.17922	-1.05954	-1.17878	-1.08562
6130397	1	121367008	121367057	-									0.999952	0.999889	0.999971	0.999975	-1.1056	1.07596	1.06925	-1.02893
5080577	1	121424614	121424663	+									0.999952	0.999889	0.999971	0.999975	-1.06505	-1.02818	-1.02167	-1.13887
104480471	1	121441939	121441988	-									0.999952	0.999889	0.999971	0.999975	-1.06779	1.03824	1.01247	-1.11372
101170593	1	121549328	121549377	-									0.999952	0.999889	0.999971	0.999975	1.05182	-1.18969	-1.00825	1.04933
3520746	1	121806298	121806347	-									0.999952	0.999889	0.999971	0.999975	-1.08439	-1.03987	-1.03244	-1.10359
1090706	1	122009894	122009943	-									0.96307	0.999889	0.999971	0.999975	-1.18905	-1.00626	1.00383	-1.02005
630091	1	122084678	122084727	+									0.999952	0.999889	0.999971	0.999975	-1.08961	-1.05653	-1.11043	-1.13257
6020706	1	122239675	122239724	+									0.999952	0.999889	3.48e-05	0.999975	-1.15339	-1.1543	2.23042	-1.19182
5700605	1	123201415	123201464	-									0.999952	0.999889	0.999971	0.999975	-1.0687	-1.01775	-1.03489	-1.05396
6450451	1	123203466	123203515	-									0.999952	0.999889	0.999971	0.999975	-1.14247	-1.07963	-1.04373	-1.18028
6980619	1	123451796	123451845	-									0.999952	0.999889	0.999971	0.999975	-1.097	-1.0589	-1.15158	-1.12548
4730746	1	125229254	125229303	-									0.999952	0.999889	0.999971	0.999975	1.09406	1.03546	1.07411	1.10172
6980050	1	127768775	127768824	-									0.999952	0.999889	0.999971	0.999975	1.17443	1.27627	1.08424	1.00908
103840142	1	127769675	127769724	+									0.999952	0.999889	0.999971	0.999975	1.17182	-1.01095	-1.00497	-1.24194
4780575	1	127810396	127810445	-									0.999952	0.999889	0.999971	0.999975	-1.01439	1.03843	1.08175	1.06852
104050725	1	129295227	129295276	+									0.627161	0.999889	0.999971	0.999975	1.26143	1.12509	1.04943	-1.0179
101400451	1	129650322	129650371	-									0.999952	0.999889	0.999971	0.999975	1.07868	-1.00719	-1.04888	-1.03894
100670368	1	129692148	129692197	+									0.999952	0.999889	0.999971	0.999975	1.11484	-1.00622	1.01351	-1.1473
1770128	1	129840349	129840398	+									0.999952	0.999889	0.999971	0.999975	-1.0223	-1.00792	1.01589	-1.1204
3990364	1	129850825	129850874	-									0.999952	0.999889	0.999971	0.999975	1.10979	1.16151	-1.06775	-1.05351
3290161	1	130059368	130059417	+									0.168536	0.999889	0.999971	0.999975	-2.25993	-1.35535	-1.09119	-1.4361
102260292	1	130133783	130133832	+									0.999952	0.999889	0.999971	0.999975	1.04866	1.15083	-1.02994	-1.01203
102350138	1	130181469	130181518	-									0.999952	0.999889	0.999971	0.835731	1.03866	1.00561	1.03172	1.36496
540181	1	130228232	130228281	-									0.999952	0.999889	0.999971	0.999975	-1.06376	-1.00739	-1.06492	-1.12449
6510110	1	130231429	130231478	-									0.999952	0.999889	0.999971	0.999975	-1.09432	-1.04609	1.004	-1.06541
3840139	1	130285708	130285757	-									0.999952	0.999889	0.999971	0.999975	1.00485	-1.05299	-1.18565	-1.02028
4590519	1	130485064	130485113	-									0.999952	0.999889	0.999971	0.999975	1.06645	-1.08228	-1.02354	-1.02946
2570750	1	132115759	132115808	+									0.999952	0.999889	0.999971	0.999975	-1.09213	1.04627	1.02879	-1.04937
7100059	1	132585994	132586043	-									0.999952	0.999889	0.999971	0.999975	1.09609	1.05968	-1.01159	-1.11578
840037	1	132618004	132618053	+									0.999952	0.999889	0.999971	0.999975	1.17831	1.05101	1.10379	-1.07367
2850500	1	132950601	132950650	-									0.999952	0.999889	0.999971	0.999975	1.02711	-1.00183	1.1885	1.00896
1090014	1	133025259	133025308	-									0.999952	0.999889	0.999971	0.999975	1.14923	1.04654	1.18781	-1.07437
3450193	1	133073562	133073611	-									0.128079	0.999889	0.999971	0.999975	-1.3563	1.00792	1.12706	-1.10697
101050450	1	133191994	133192043	-									0.999952	0.999889	0.999971	0.999975	-1.09358	1.03532	1.05812	1.04826
104060687	1	133547096	133547145	+									0.999952	0.999889	0.999971	0.999975	1.17139	1.11341	1.13288	1.04742
103390253	1	133547811	133547860	+									0.57517	0.999889	0.999971	0.999975	1.49351	1.19245	1.41352	1.35587
430450	1	133769135	133769184	+									0.999952	0.999889	0.999971	0.999975	-1.03312	-1.13235	-1.01543	1.03349
103800279	1	133923815	133923864	-									0.999952	0.999889	0.999971	0.999975	1.10857	-1.01767	-1.02381	-1.08773
101340239	1	133924053	133924102	-									0.999952	0.999889	0.999971	0.999975	1.16354	-1.00323	-1.03032	-1.04718
102850411	1	133928651	133928700	+									0.999952	0.999889	0.999971	0.999975	1.08807	1.05069	-1.01759	-1.05232
103780113	1	133962810	133962859	-									0.999952	0.999889	0.999971	0.999975	1.03257	-1.00998	1.05062	1.01892
3990132	1	134153552	134153601	+									0.999952	0.999889	0.999971	0.999975	1.08015	1.18249	1.17354	1.12687
5690600	1	134229736	134229785	+									0.999952	0.999889	0.999971	0.999975	-1.11518	1.06464	1.03003	-1.01128
6900762	1	134253218	134253267	-									0.999952	0.999889	0.999971	0.999975	1.0007	-1.09155	-1.06366	-1.05616
105910471	1	134401637	134401686	+									0.999952	0.999889	0.999971	0.999975	-1.11858	-1.00616	-1.09192	-1.08951
4560750	1	134405104	134405153	+									0.999952	0.999889	0.999971	0.999975	-1.09084	-1.0871	-1.03141	-1.11427
2760204	1	134409652	134409701	-									5.23e-11	0.177763	1.35e-08	6.53e-05	-4.30446	-1.71761	-3.43301	-2.38301
4280292	1	134836439	134836488	+									0.999952	0.999889	0.999971	0.999975	1.14245	-1.14462	1.0058	-1.04776
5900390	1	135806918	135806967	-									0.999952	0.999889	0.999971	0.999975	1.23682	1.34526	-1.13585	-1.2525
1170039	1	136086423	136086472	+									0.999952	0.999889	0.999971	0.999975	-1.05209	1.19268	1.04834	-1.0572
6370520	1	136098200	136098249	-									0.999952	0.999889	0.999971	0.999975	1.23692	1.05679	1.13624	-1.06533
5890458	1	136242897	136242946	-									0.999952	0.999889	0.999971	0.999975	-1.03203	-1.03575	1.11251	-1.01455
450377	1	136308045	136308094	+									0.999952	0.999889	0.999971	0.999975	-1.02508	-1.1477	1.03073	-1.0799
3140440	1	136328667	136328716	+									0.999952	0.999889	0.999971	0.999975	-1.1383	-1.05456	-1.02103	-1.04198
5910543	1	136403989	136404038	+									0.999952	0.999889	0.999971	0.999975	1.05118	-1.0523	-1.01016	-1.16406
105080458	1	136527837	136527884	+									0.999952	0.999889	0.999971	0.999975	1.07723	1.04232	1.04543	-1.17111
4730494	1	136529186	136529235	+									0.999952	0.999889	0.999971	0.999975	-1.01447	-1.01073	1.05129	-1.0797
100770070	1	136676414	136676463	-									0.999952	0.999889	0.999971	0.740523	-1.10463	-1.08975	1.04999	-1.23563
1450088	1	136772551	136772600	-									0.636908	0.999889	0.999971	0.999975	-1.6103	-1.14855	-1.06111	-1.17979
101660164	1	136789927	136789952	-	1	136788856	136788879	-					0.950088	0.999889	0.999971	0.999975	-1.24301	-1.16281	-1.1066	-1.13313
4810162	1	137052721	137052770	+									0.999952	0.999889	0.999971	0.999975	1.07299	-1.24913	-1.01586	-1.0311
5900373	1	137057233	137057282	-									0.999952	0.999889	0.999971	0.999975	-1.25744	-1.14341	-1.13404	-1.1439
2650685	1	137159453	137159502	-									0.999952	0.999889	0.999971	0.999975	-1.13277	1.03859	-1.04576	-1.11402
130092	1	137198146	137198195	-									0.999952	0.999889	0.999971	0.826641	-1.06045	1.0084	-1.0524	-1.17454
1690048	1	137268120	137268169	-									0.999952	0.999889	0.999971	0.999975	1.07679	1.11341	1.07311	1.05599
102680603	1	137270678	137270727	-									0.999952	0.999889	0.999971	0.999975	1.01979	1.04888	1.07461	-1.05003
4560132	1	137281133	137281182	-									0.999952	0.999889	0.999971	0.999975	1.09373	-1.10316	-1.03504	-1.21445
103990746	1	137335166	137335215	-									0.977797	0.999889	0.999971	0.999975	-1.19496	1.04776	1.00847	-1.06515
6620129	1	137335466	137335515	-									0.999952	0.999889	0.999971	0.999975	-1.02676	1.10177	1.13136	-1.12198
2450364	1	137748721	137748770	+									0.999952	0.999889	0.999971	0.999975	-1.02993	-1.04147	1.14291	1.03285
4230440	1	137850246	137850295	-									0.999952	0.999889	0.999971	0.999975	-1.03014	1.02923	-1.12458	1.05081
130039	1	137931119	137931168	+									0.999952	0.999889	0.999971	0.999975	-1.09699	-1.16339	1.0558	-1.11542
2630026	1	138070129	138070178	+									0.999952	0.999889	0.999971	0.999975	-1.08867	-1.02193	-1.02586	1.11408
100730692	1	138146688	138146737	+									0.999952	0.999889	0.999971	0.999975	-1.11473	-1.0095	-1.00715	-1.00645
103360050	1	138165114	138165163	-									0.999952	0.999889	0.999971	0.999975	-1.073	1.13125	-1.02788	-1.0983
4730132	1	138524504	138524553	+									0.999952	0.999889	0.999971	0.999975	1.16583	1.0006	1.04912	-1.09976
104590079	1	138526417	138526466	+									0.999952	0.999889	0.999971	0.999975	1.01634	1.03345	-1.05227	-1.11442
106220369	1	139866367	139866416	+									0.222693	0.999889	0.999971	0.999975	1.35047	-1.04869	1.0114	1.01523
105550722	1	140750178	140750227	-									0.999952	0.999889	0.999971	0.999975	-1.09049	1.08363	1.03753	1.10205
2480112	1	141345504	141345553	+									0.999952	0.999889	0.999971	0.999975	-1.13053	-1.10186	-1.02913	1.01597
104210086	1	141349199	141349248	+									0.999952	0.999889	0.999971	0.999975	1.07655	1.04978	-1.00241	-1.05898
106520427	1	145451577	145451626	-									0.999952	0.999889	0.999971	0.999975	-1.08712	-1.01886	-1.04532	-1.05877
104280706	1	145586784	145586833	+									0.999952	0.999889	0.999971	0.999975	-1.10305	-1.0312	1.09554	1.12325
940433	1	145592296	145592345	+									0.999952	0.999889	0.999971	0.999975	-1.15936	-1.04268	-1.08765	-1.15217
106130082	1	145598071	145598120	-									0.999952	0.999889	0.999971	0.999975	1.01828	1.02199	-1.01746	-1.10914
107100601	1	145600570	145600599	-									0.999952	0.999889	0.999971	0.999975	-1.14722	-1.03465	-1.06666	-1.06704
4850458	1	145603027	145603076	-									0.999952	0.999889	0.999971	0.999975	-1.02166	1.06773	1.0728	-1.08533
540139	1	145641419	145641468	+									0.999952	0.999889	0.999971	0.999975	1.08857	-1.02474	1.06022	-1.00053
1690053	1	145645619	145645623	+	1	145647051	145647095	+					0.999952	0.999889	0.999971	0.999975	-1.08857	-1.16373	1.08902	-1.07311
102370592	1	145653931	145653980	+									0.999952	0.999889	0.999971	0.999975	1.0476	1.06447	-1.01383	-1.07655
1090736	1	145847183	145847232	-									0.999952	0.999889	0.999971	0.999975	-1.08025	1.00578	-1.02451	-1.08024
1980164	1	152209749	152209798	-									2.87e-09	0.00133785	2.45e-10	3.79e-07	5.29697	3.00169	6.00972	4.0345
6550390	1	152294739	152294760	+	1	152296273	152296300	+					7.76e-05	0.0113569	4.61e-05	0.00389135	2.48053	2.175	2.55028	2.03819
6520113	1	153210259	153210308	+									0.999952	0.999889	0.999971	0.999975	1.15199	-1.10708	1.08275	-1.25815
102940520	1	153211447	153211496	+									0.999952	0.999889	0.999971	0.999975	1.07102	1.09871	1.01676	-1.188
3710605	1	153215055	153215104	-									0.0881595	0.999889	0.368751	0.232347	-1.52167	-1.18523	-1.41432	-1.43836
102060273	1	153305072	153305121	+									0.904955	0.999889	0.999971	0.999975	1.27337	1.22724	1.1676	1.10777
100110369	1	153738123	153738172	-									0.304509	0.999889	0.466617	0.768227	1.33853	1.22483	1.33586	1.25782
6020451	1	153739785	153739834	-									0.999952	0.999889	0.999971	0.999975	1.08434	-1.11617	1.12091	1.06019
3780484	1	154217990	154218039	-									0.999952	0.999889	0.999971	0.846215	-1.03628	-1.06831	-1.08515	-1.27357
1500097	1	154364795	154364844	-									0.999952	0.999889	0.999971	0.999975	1.04598	1.18497	-1.00948	1.0394
3450300	1	154616005	154616054	+									0.999952	0.999889	0.999971	0.999975	-1.01306	1.02401	-1.09941	1.00537
102370010	1	154621489	154621538	+									0.999952	0.999889	0.999971	0.999975	-1.01475	1.00767	-1.06438	-1.01822
2650133	1	154683315	154683364	+									0.999952	0.999889	0.999971	0.999975	1.05694	-1.01317	-1.18237	-1.05477
103170068	1	154684311	154684360	-									0.999952	0.999889	0.999971	0.999975	-1.05741	1.04758	-1.06955	-1.21284
102260082	1	154966059	154966108	+									0.999952	0.999889	0.999971	0.999975	-1.06901	1.15099	-1.00583	1.0831
4730025	1	155066120	155066169	-									0.830141	0.999889	0.999971	0.822264	-1.16817	-1.00529	-1.0176	-1.18739
1170095	1	155303245	155303294	-									0.999952	0.999889	0.999971	0.999975	1.08907	-1.11646	1.11486	-1.03513
6760440	1	155544494	155544543	+									0.999952	0.999889	0.999971	0.999975	-1.08611	1.26664	-1.12586	1.11881
780091	1	155592371	155592420	+									0.999952	0.999889	0.0266606	0.999975	1.14839	1.22154	-1.61013	1.08223
6040253	1	155756756	155756805	+									0.436672	0.999889	0.691914	0.779205	-1.39318	-1.25555	-1.39046	-1.32932
6770278	1	157049727	157049776	+									0.999952	0.999889	0.999971	0.999975	1.0529	-1.03475	-1.00556	-1.12922
4070609	1	157059620	157059669	-									0.881842	0.999889	0.999971	0.999975	1.12039	1.05186	1.05655	1.10997
106660112	1	157123005	157123054	-									0.999952	0.999889	0.999971	0.999975	-1.21122	1.07774	-1.01412	-1.1468
101850750	1	157123088	157123137	-									0.999952	0.999889	0.999971	0.999975	-1.21055	-1.01041	-1.03631	-1.06093
4200446	1	157534154	157534203	+									0.999952	0.999889	0.999971	0.999975	-1.10357	1.04573	-1.0107	-1.09782
106760047	1	157625412	157625461	-									0.999952	0.999889	0.999971	0.999975	-1.13899	1.05779	-1.00508	-1.00173
106900112	1	157692319	157692368	-									0.999952	0.999889	0.999971	0.999975	-1.11997	1.12857	-1.01875	-1.08252
6370706	1	157854150	157854199	-									0.930757	0.999889	0.999971	0.629543	-1.14022	-1.06135	-1.10666	-1.19563
106450725	1	158358689	158358738	-									0.999952	0.999889	0.999971	0.999975	-1.02416	1.01019	-1.17815	-1.12693
1190019	1	158359959	158360008	-									0.999952	0.999889	0.999971	0.999975	-1.21269	-1.12778	-1.27056	-1.05525
2030215	1	158611231	158611280	-									0.311899	0.999889	0.999971	0.999975	-1.43538	-1.20395	-1.05549	-1.19273
103800088	1	158734429	158734478	-									0.999952	0.999889	0.999971	0.999975	1.08044	1.16213	1.26948	-1.0309
4780270	1	158738413	158738462	-									0.999952	0.999889	0.999971	0.999975	-1.02315	-1.05104	1.12683	-1.0752
3780687	1	159068469	159068518	-									0.999952	0.999889	0.999971	0.999975	1.04823	-1.10533	-1.00109	1.02801
1690377	1	159107784	159107833	-									0.999952	0.999889	0.999971	0.999975	1.03219	-1.0791	1.0163	-1.15434
101990093	1	159216912	159216961	-									0.999952	0.999889	0.999971	0.999975	1.15079	1.0695	1.03348	1.02749
6520176	1	159350217	159350266	+									0.999952	0.999889	0.999971	0.999975	-1.04305	1.01681	1.05979	-1.02435
4210364	1	159418787	159418836	+									0.999952	0.999889	0.999971	0.966035	-1.0286	-1.10509	1.10752	-1.16271
5420463	1	160175574	160175623	-									0.999952	0.999889	0.999971	0.929294	-1.02862	-1.02069	-1.1827	-1.22913
5690180	1	160621610	160621659	+									0.999952	0.999889	0.999971	0.999975	-1.17297	1.01411	1.00099	-1.14898
1690162	1	161275270	161275319	+									0.999952	0.999889	0.999971	0.999975	-1.18536	-1.27605	-1.07525	-1.18614
106940368	1	161277631	161277680	+									0.999952	0.999889	0.999971	0.999975	-1.09387	-1.00251	-1.08333	-1.07417
1410014	1	162133331	162133380	-									0.999952	0.999889	0.999971	0.999975	1.07219	-1.18794	-1.0985	-1.17378
102690017	1	162153702	162153751	-									0.999952	0.999889	0.999971	0.999975	1.0133	-1.0381	-1.08968	-1.08331
3190014	1	162272176	162272225	-									0.879693	0.999889	0.999971	0.999975	-1.3619	-1.16016	-1.02427	-1.1363
100670717	1	162898012	162898061	+									0.999952	0.999889	0.999971	0.999975	-1.06389	-1.2131	-1.01625	-1.05145
4210551	1	162967253	162967297	+									0.999952	0.999889	0.999971	0.999975	-1.10912	1.03812	1.07034	-1.03272
6200484	1	162972007	162972056	-									0.999952	0.999889	0.999971	0.999975	-1.05494	1.05302	1.11022	-1.00364
6380601	1	163171347	163171396	-									0.999952	0.999889	0.999971	0.999975	-1.06809	-1.02805	-1.04182	-1.06199
102260458	1	163179009	163179058	-									0.999952	0.999889	0.999971	0.999975	-1.11137	1.04049	1.02336	-1.07174
510497	1	164463925	164463974	-									0.999952	0.999889	0.999971	0.999975	-1.06069	1.03544	1.0489	-1.02606
105340035	1	164525086	164525135	+									0.999952	0.999889	0.999971	0.999975	-1.102	1.02232	-1.0492	-1.08618
4150102	1	164529056	164529105	+									0.999952	0.999889	0.999971	0.999975	-1.02231	1.05075	1.09011	-1.06028
4060279	1	164600986	164601035	-									0.999952	0.999889	0.999971	0.999975	1.04962	1.05578	-1.0178	-1.03513
104560619	1	164640508	164640557	-									0.439051	0.999889	0.999971	0.999975	-1.99027	-1.29427	-1.10492	1.05409
102340332	1	164640509	164640558	-									0.364203	0.999889	0.999971	0.999975	-1.75244	-1.18236	1.06069	1.05219
103290369	1	164640669	164640718	-									0.305455	0.999889	0.999971	0.999975	-1.91238	-1.45045	-1.18868	1.01716
102260400	1	164654835	164654866	-	1	164653401	164653418	-					0.999952	0.999889	0.999971	0.660646	-1.22625	-1.12854	-1.09353	-1.46475
106620114	1	164670456	164670476	-	1	164654974	164655000	-					0.999952	0.999889	0.999971	0.999975	-1.15221	-1.14511	-1.07482	-1.26272
102450025	1	165183120	165183169	-									0.999952	0.999889	0.999971	0.999975	-1.0513	1.08574	1.01885	1.06457
6940075	1	165846921	165846970	+									0.999952	0.999889	0.999971	0.999975	-1.03728	-1.13144	1.05708	-1.0957
3140253	1	165885010	165885059	+									0.999952	0.999889	0.999971	0.999975	1.04758	1.04652	-1.13189	-1.00892
7000551	1	165927132	165927181	+									0.999952	0.999889	0.999971	0.999975	-1.02393	-1.08966	-1.00618	-1.07825
6200750	1	166195371	166195420	+									0.999952	0.999889	0.999971	0.999975	-1.01106	1.08198	1.05434	-1.03804
1450446	1	166217766	166217815	+									0.999952	0.999889	0.999971	0.999975	-1.13304	1.01939	1.04939	-1.1318
2850333	1	166333154	166333203	+									0.999952	0.999889	0.999971	0.999975	-1.21006	-1.01534	-1.01397	-1.11788
4200102	1	166367179	166367228	+									0.999952	0.999889	0.999971	0.843894	-1.06534	-1.05634	-1.00784	-1.2244
103710546	1	166367261	166367310	-									0.999952	0.999889	0.999971	0.999975	-1.00582	-1.02232	-1.09889	-1.03084
106940632	1	166367275	166367324	-									0.999952	0.999889	0.999971	0.999975	1.03154	-1.01289	-1.15057	1.00428
101690170	1	166367292	166367341	-									0.999952	0.999889	0.999971	0.999975	-1.00072	-1.09404	-1.15915	-1.11699
3130594	1	166367693	166367742	-									0.999952	0.999889	0.999971	0.999975	1.05408	-1.08924	1.04294	-1.01524
106100035	1	167104536	167104585	-									0.999952	0.999889	0.999971	0.999975	-1.12181	1.02786	-1.24153	-1.07251
6100129	1	167104785	167104834	-									0.999952	0.999889	0.999971	0.999975	-1.15367	-1.01259	-1.11868	-1.03828
160475	1	167263442	167263491	-									0.999952	0.999889	0.999971	0.999975	1.1132	-1.02548	-1.03653	1.01765
3390372	1	167391494	167391543	+									0.999952	0.999889	0.999971	0.999975	-1.08318	-1.01626	-1.01015	1.00791
2120369	1	167409629	167409678	+									0.999952	0.999889	0.999971	0.999975	-1.02338	-1.11633	-1.04515	1.04091
6040280	1	167579154	167579203	-									0.999952	0.999889	0.999971	0.999975	-1.14425	1.12295	-1.1945	-1.13903
70577	1	167805816	167805865	-									0.999952	0.999889	0.999971	0.999975	-1.04673	1.02243	1.15349	-1.12461
106420008	1	168245365	168245414	+									0.999952	0.999889	0.999971	0.999975	1.02362	1.00689	-1.03634	1.07878
104200044	1	168246775	168246824	+									0.999952	0.999889	0.999971	0.999975	1.13041	1.2685	-1.03956	1.05747
3850440	1	168323293	168323342	+									0.999952	0.999889	0.999971	0.999975	-1.0899	-1.07982	-1.06192	-1.27442
102850088	1	168325196	168325245	-									0.999952	0.999889	0.999971	0.999975	-1.03061	-1.04693	-1.07435	-1.07565
100360044	1	168325617	168325666	-									0.999952	0.999889	0.999971	0.999975	-1.12332	-1.04682	-1.01853	-1.1284
5220142	1	169153052	169153101	-									0.999952	0.999889	0.999971	0.999975	1.0188	1.19271	1.04972	1.02748
3610040	1	169156410	169156459	-									0.905108	0.999889	0.999971	0.999975	-1.12241	1.0192	-1.04331	-1.02764
4480463	1	169260533	169260582	+									0.999952	0.999889	0.999971	0.999975	-1.14396	-1.06883	-1.04673	-1.13668
3450338	1	169302611	169302660	-									0.999952	0.999889	0.999971	0.999975	1.13593	1.08403	1.196	1.03775
5290736	1	169303925	169303974	-									0.999952	0.999889	0.999971	0.999975	1.15165	1.01103	1.22102	1.08454
7040008	1	169569353	169569402	+									0.999952	0.999889	0.999971	0.999975	-1.04986	-1.07809	1.19775	-1.17438
6660301	1	170050381	170050430	-									0.942509	0.999889	0.999971	0.999975	-1.23198	-1.03143	1.06571	-1.05081
105080204	1	170084327	170084376	-									0.999952	0.999889	0.999971	0.999975	1.00626	-1.11098	1.02668	1.00888
106840546	1	170223163	170223212	-									0.999952	0.999889	0.999971	0.999975	-1.19892	1.06665	1.02248	-1.09246
670685	1	170349824	170349873	-									0.999952	0.999889	0.999971	0.999975	1.19306	-1.11222	1.10975	-1.05093
102100546	1	170355703	170355752	-									0.999952	0.999889	0.999971	0.999975	1.12176	-1.20381	1.06542	-1.11023
101410068	1	171623368	171623417	+									0.999952	0.999889	0.999971	0.999975	-1.09851	-1.15958	-1.21663	-1.41005
2970711	1	171672462	171672511	-									0.999952	0.999889	0.999971	0.999975	1.03125	-1.10146	-1.25727	-1.19831
100050181	1	171864481	171864530	+									0.999952	0.999889	0.999971	0.999975	-1.05033	-1.01251	-1.047	1.00222
7000142	1	171879733	171879782	-									0.999952	0.999889	0.999971	0.999975	-1.02196	-1.10624	-1.07548	-1.02596
106620692	1	171880938	171880963	-									0.999952	0.999889	0.999971	0.999975	-1.08654	-1.01171	-1.00114	-1.09445
103170136	1	171902646	171902695	-									0.890327	0.999889	0.999971	0.999975	1.18859	-1.01527	-1.06371	1.01808
3060093	1	172072553	172072602	-									0.999952	0.999889	0.999971	0.999975	-1.06931	-1.03813	-1.01774	1.05927
101780253	1	172123588	172123637	-									0.999952	0.999889	0.999971	0.999975	-1.0136	1.18396	-1.01613	1.03755
106650471	1	172257548	172257597	-									0.999952	0.999889	0.999971	0.999975	-1.17136	-1.10788	1.13325	-1.01095
4060056	1	172612689	172612738	+									0.999952	0.999889	0.999971	0.999975	1.01767	-1.13125	-1.03239	1.31691
3840184	1	172981699	172981748	-									0.446211	0.999889	0.560225	0.411435	-1.29266	-1.15214	-1.31034	-1.31708
5700551	1	173056769	173056818	+									0.999952	0.999889	0.999971	0.999975	-1.08868	-1.08355	1.03114	-1.05396
3140347	1	173059465	173059514	-									0.999952	0.999889	0.999971	0.999975	-1.1353	1.08786	-1.12895	-1.10166
103710092	1	173103570	173103619	-									0.700604	0.999889	0.999971	0.999975	-1.35975	1.03056	-1.19071	-1.22849
102480347	1	173104042	173104091	-									0.0872746	0.999889	0.999971	0.999975	-1.6931	-1.1369	-1.01449	-1.16112
105080114	1	173149354	173149403	-									0.999952	0.999889	0.999971	0.999975	-1.07443	1.01977	-1.1164	1.00412
106840154	1	173149422	173149471	-									0.999952	0.999889	0.999971	0.999975	-1.21167	1.03552	-1.14755	1.00087
4850020	1	173168673	173168722	-									0.999952	0.999889	0.999971	0.999975	1.03172	-1.14218	-1.06246	-1.06646
6200402	1	173168863	173168912	-									0.999952	0.999889	0.999971	0.999975	1.09284	-1.14297	-1.02626	-1.04463
6040064	1	173206017	173206066	+									0.999952	0.999889	0.999971	0.999975	1.11058	-1.1035	1.0039	-1.08957
2640678	1	173207220	173207269	-									0.999952	0.999889	0.999971	0.999975	-1.07478	-1.04051	1.00385	-1.07554
3060446	1	173212297	173212346	-									0.880857	0.999889	0.999971	0.999975	-1.2208	1.01952	-1.00728	-1.15066
6860546	1	173219048	173219097	-									0.999952	0.999889	0.999971	0.999975	-1.07977	1.04861	1.00637	-1.07678
3940671	1	173272391	173272440	-									0.999952	0.999889	0.999971	0.999975	1.03866	-1.16624	-1.04088	-1.23693
102230184	1	173272400	173272449	+									0.999952	0.999889	0.999971	0.999975	1.03737	1.10708	1.03601	-1.08938
4230156	1	173286889	173286938	+									0.999952	0.999889	0.999971	0.999975	1.02333	1.15269	1.3086	1.05664
2260403	1	173288886	173288935	-									0.999952	0.999889	0.959275	0.997111	1.19826	1.11407	1.32324	1.25088
6370113	1	173348750	173348799	+									0.999952	0.999889	0.999971	0.999975	-1.03529	-1.10422	-1.10825	-1.09315
105570368	1	173350335	173350384	+									0.0273292	0.999889	0.999971	5.9e-15	1.43414	1.05669	1.20013	3.243
7000324	1	173434804	173434853	+									0.999952	0.999889	0.999971	0.879924	-1.03405	-1.06531	-1.11869	-1.20544
101990707	1	173931414	173931463	-									0.999952	0.999889	0.999971	0.999975	-1.00409	-1.0393	1.03416	-1.1458
870075	1	173934521	173934570	-									0.999952	0.999889	0.999971	0.999975	-1.09564	-1.02767	1.04121	-1.11467
6400594	1	173996283	173996332	-									0.999952	0.999889	0.999971	0.999975	-1.09924	-1.07299	1.05719	-1.13609
2570519	1	174052232	174052281	+									0.999952	0.999889	0.999971	0.999975	-1.07127	-1.03084	1.08757	1.04108
3140037	1	174065346	174065395	+									0.999952	0.999889	0.999971	0.999975	1.05644	-1.05316	-1.02172	-1.07511
6200019	1	174125334	174125383	+									0.999952	0.999889	0.999971	0.999975	-1.21607	-1.09015	1.01944	-1.09013
4590685	1	174127048	174127097	-									0.999952	0.999889	0.999971	0.999975	-1.09189	1.14438	1.05543	1.00485
105420390	1	174129242	174129271	-	1	174128802	174128821	-					0.999952	0.999889	0.999971	0.999975	1.06526	-1.16649	-1.19021	-1.06659
110278	1	174206051	174206100	-									0.999952	0.999889	0.999971	0.999975	-1.04822	-1.08334	-1.08139	-1.33199
106590647	1	174250927	174250976	-									0.999952	0.999889	0.999971	0.999975	-1.08175	1.00638	1.0197	-1.00185
3440292	1	174253156	174253205	-									0.999952	0.999889	0.999971	0.999975	1.1671	-1.03628	1.07834	-1.02952
4560121	1	174437134	174437183	+									0.999952	0.999889	0.999971	0.999975	-1.08723	-1.09325	-1.02428	-1.06716
3780408	1	174475928	174475977	+									0.999952	0.999889	0.999971	0.999975	-1.1773	-1.10024	-1.11308	-1.13015
6100632	1	174560945	174560994	-									0.999952	0.999889	0.999971	0.999975	-1.08004	-1.06541	-1.04115	-1.13837
3890376	1	174561591	174561637	-									0.999952	0.999889	0.999971	0.752119	1.01643	-1.00684	-1.07961	-1.15627
3940050	1	175262178	175262227	-									0.999952	0.999889	0.999971	0.999975	-1.13942	-1.01004	-1.02389	1.05414
6660072	1	175264563	175264612	-									0.999952	0.999889	0.999971	0.999975	-1.08345	-1.05259	-1.15542	-1.04162
102940332	1	175628286	175628335	+									0.999952	0.999889	0.999971	0.999975	-1.09415	1.09992	-1.05983	-1.18198
450463	1	176751678	176751727	+									0.999952	0.999889	0.999971	0.999975	-1.04351	-1.09196	1.05556	-1.27408
3390044	1	176989663	176989712	-									0.999952	0.999889	0.999971	0.999975	-1.05214	-1.01837	-1.0001	-1.01032
2510575	1	177531618	177531667	-									0.999952	0.999889	0.999971	0.999975	1.00401	-1.07715	-1.00604	-1.04947
2690427	1	177745803	177745852	+									0.999952	0.999889	0.999971	0.999975	1.04667	1.05166	-1.05531	1.06225
102940341	1	178664007	178664056	-									0.999952	0.999889	0.999971	0.999975	-1.0384	1.13001	1.00952	-1.10576
1580270	1	178952271	178952320	-									0.999952	0.999889	0.999971	0.999975	1.16674	-1.04989	-1.01629	-1.15896
5050537	1	179379334	179379383	+									0.789931	0.999889	0.999971	0.999975	1.44086	-1.03718	-1.1243	1.0335
5550072	1	179380688	179380737	+									0.784901	0.999889	0.999971	0.999975	1.50824	-1.05127	-1.05596	1.09786
106200348	1	180123985	180124034	+									0.999952	0.999889	0.999971	0.999975	1.18333	-1.03165	1.05868	-1.1074
5670280	1	180182631	180182680	+									0.999952	0.999889	0.999971	0.999975	1.07699	-1.05601	1.04862	-1.13829
5420433	1	180251906	180251955	+									0.999952	0.999889	0.999971	0.999975	-1.04271	-1.03876	-1.00931	-1.16498
3190358	1	180413323	180413372	+									0.999952	0.999889	0.999971	0.783793	-1.14206	-1.13176	1.00139	-1.30328
103780088	1	180414570	180414619	+									0.999952	0.999889	0.999971	0.999975	-1.07754	1.06154	1.21342	-1.15367
1940288	1	180862769	180862818	+									0.999952	0.999889	0.999971	0.923665	-1.10885	-1.0437	1.03877	-1.15452
106980647	1	180869195	180869244	+									0.999952	0.999889	0.999971	0.999975	-1.0321	-1.03451	-1.06018	-1.11965
5720053	1	180885519	180885568	-									0.999952	0.999889	0.999971	0.999975	-1.07893	-1.09366	1.22575	-1.10384
103610044	1	181167505	181167554	-									0.999952	0.999889	0.999971	0.999975	1.1618	1.00158	1.26144	-1.10085
4210088	1	181557154	181557203	+									0.999952	0.999889	0.999971	0.999975	1.03874	1.002	1.03163	-1.14644
6180014	1	181617241	181617290	+									0.999952	0.999889	0.999971	0.999975	-1.00106	1.07104	1.08024	-1.07315
100060576	1	181675221	181675270	-									0.999952	0.999889	0.999971	0.999975	1.10175	1.10075	1.00531	-1.06656
100240180	1	181675223	181675272	-									0.999952	0.999889	0.999971	0.999975	1.06333	1.1162	1.00581	-1.03083
7040100	1	181676280	181676329	-									0.999952	0.999889	0.999971	0.999975	1.02381	1.02445	1.03977	-1.14165
101940438	1	182059270	182059319	+									0.999952	0.999889	0.999971	0.999975	-1.05283	1.01138	1.11524	-1.03015
101740575	1	182095740	182095789	-									0.999952	0.999889	0.999971	0.999975	1.0455	-1.01902	1.03149	-1.01963
130382	1	182157439	182157488	-									0.999952	0.999889	0.999971	0.999975	-1.0992	1.03798	1.05335	-1.08521
103170725	1	182257140	182257189	-									0.999952	0.999889	0.999971	0.999975	-1.00987	1.05129	-1.19181	-1.07402
1660458	1	182257154	182257203	-									0.999952	0.999889	0.999971	0.999975	-1.13053	-1.05347	1.06098	-1.11345
102100373	1	182354702	182354751	+									0.569307	0.999889	0.999971	0.999975	-1.28321	-1.12158	-1.13944	1.03429
105420242	1	182362723	182362772	-									0.503341	0.999889	0.999971	0.999975	1.58022	1.13892	1.07892	1.00559
4780446	1	182530816	182530865	+									0.999952	0.999889	0.999971	0.999975	1.08316	1.0709	1.11105	1.01963
2760170	1	182684124	182684173	+									0.999952	0.999889	0.999971	0.999975	1.02548	-1.01763	1.04538	-1.12906
2900086	1	182732796	182732845	-									0.999952	0.999889	0.999971	0.999975	1.00466	-1.02621	-1.0024	-1.05966
106770438	1	182740248	182740276	-	1	182733320	182733336	-					0.999952	0.999889	0.999971	0.999975	-1.00058	-1.02014	-1.03589	-1.02255
106840110	1	182740248	182740289	-	1	182733330	182733336	-					0.999952	0.999889	0.999971	0.999975	-1.01943	-1.04741	-1.05739	-1.05135
105570021	1	182786035	182786051	+	1	182788254	182788286	+					0.999952	0.999889	0.999971	0.999975	-1.09224	-1.0549	-1.00387	-1.10794
5890594	1	182904875	182904924	+									0.999952	0.999889	0.999971	0.910996	-1.1353	1.04793	1.07046	1.22854
1740136	1	182919841	182919890	-									0.999952	0.999889	0.999971	0.999975	-1.11566	1.03142	-1.04584	-1.05205
100380504	1	183023298	183023347	-									0.999952	0.999889	0.999971	0.999975	-1.01316	1.10572	1.05711	1.01094
103290040	1	183085997	183086046	+									0.999952	0.999889	0.999971	0.999975	-1.0528	-1.05049	-1.02467	-1.06649
2810278	1	183389955	183390004	+									0.999952	0.999889	0.999971	0.999975	-1.08272	1.04703	1.12276	1.07941
4570193	1	183440037	183440086	-									0.999952	0.999889	0.999971	0.999975	1.01742	1.02769	-1.0894	-1.0643
4540671	1	183745539	183745588	-									0.999952	0.999889	0.999971	0.999975	1.06865	1.04212	1.0893	-1.04043
102690446	1	183834626	183834675	-									0.999952	0.999889	0.999971	0.999975	-1.18582	-1.13189	-1.14861	-1.20753
5700300	1	183835712	183835761	-									0.93647	0.999889	0.999971	0.999975	1.18579	1.20309	1.19784	-1.01603
103170673	1	183886266	183886315	-									0.999952	0.999889	0.999971	0.999975	-1.06695	-1.10717	-1.03378	1.11167
3170053	1	184062205	184062254	+									0.999952	0.999889	0.999971	0.999975	-1.02684	1.04058	-1.00285	-1.08939
5910021	1	184206212	184206261	-									0.999952	0.999889	0.999971	0.999975	1.04742	1.13994	1.09654	-1.05198
1340358	1	184245820	184245869	-									0.999952	0.999889	0.999971	0.999975	-1.00508	1.03715	1.04664	-1.06306
4480041	1	184391984	184392033	+									0.999952	0.999889	0.999971	0.999975	-1.01762	-1.02289	1.02693	-1.03261
2360601	1	184397559	184397608	-									0.600789	0.999889	0.999971	0.999975	-1.33336	-1.00184	-1.02429	-1.25483
101410086	1	184414175	184414224	-									0.928184	0.999889	0.999971	0.593172	-1.16054	-1.05728	-1.00392	-1.23145
1850017	1	184825473	184825522	+									0.905032	0.999889	0.999971	0.954218	-1.41891	-1.03979	-1.17135	-1.45593
101230504	1	184826527	184826576	+									0.999952	0.999889	0.999971	0.999975	-1.19197	1.17418	-1.04361	-1.0979
5130673	1	186695894	186695943	-									0.999952	0.999889	0.999971	0.999975	-1.04971	1.21482	1.10375	-1.08005
450484	1	186721689	186721738	-									0.999952	0.999889	0.999971	0.999975	1.14924	1.06708	1.09062	-1.09123
4850377	1	187107777	187107826	+									0.999952	0.999889	0.999971	0.999975	1.04829	1.09724	-1.07605	-1.09885
105910020	1	187110369	187110418	+									0.916752	0.999889	0.999971	0.999975	-1.22288	1.09823	-1.07618	-1.11034
4760204	1	187110874	187110923	-									0.999952	0.999889	0.999971	0.999975	-1.11325	-1.05189	-1.07498	-1.03845
1570551	1	187181364	187181413	+									0.999952	0.999889	0.999971	0.999975	1.03969	-1.02394	-1.08315	-1.25406
102760133	1	187289089	187289138	+									0.999952	0.999889	0.999971	0.999975	1.05032	-1.05069	1.02606	1.01447
5670048	1	187911837	187911886	-									0.999952	0.999889	0.999971	0.999975	1.01123	-1.28185	-1.07235	-1.18038
102470451	1	188446818	188446867	-									0.999952	0.999889	0.999971	0.999975	1.0554	1.01004	-1.13048	1.05038
4920292	1	188447787	188447836	-									0.999952	0.999889	0.999971	0.999975	1.23791	-1.02678	1.07889	1.11329
102760047	1	188470148	188470197	-									0.999952	0.999889	0.999971	0.999975	-1.06885	1.07679	1.11575	-1.04233
3360113	1	188545180	188545229	-									0.999952	0.999889	0.999971	0.999975	-1.12179	-1.01865	1.01958	-1.09568
3850647	1	189175156	189175205	+									0.999952	0.999889	0.999971	0.999975	1.03877	-1.11223	1.0155	-1.07223
4120538	1	190795003	190795052	-									0.999952	0.999889	0.999971	0.999975	-1.04346	1.02258	-1.10056	-1.00488
7000497	1	191031833	191031882	-									0.999952	0.999889	0.999971	0.654421	1.10417	-1.03493	-1.08771	-1.32501
102360746	1	191168617	191168666	+									0.999952	0.999889	0.999971	0.999975	-1.06115	-1.04702	1.03496	-1.12801
5050026	1	191712699	191712748	-									0.999952	0.999889	0.999971	0.999975	1.06873	1.07458	1.12008	-1.13078
4210193	1	191946388	191946437	-									0.999952	0.999889	0.999971	0.999975	-1.09062	1.10451	-1.02024	1.00524
3780240	1	192769298	192769347	+									0.999952	0.999889	0.999971	0.999975	1.13687	-1.04265	1.03865	-1.098
3130300	1	192770054	192770103	+									0.999952	0.999889	0.999971	0.999975	1.04603	1.0339	1.08834	-1.03342
2030059	1	192771654	192771703	-									0.999952	0.999889	0.999971	0.999975	-1.13011	-1.1454	1.16421	-1.09346
106940037	1	192829920	192829969	-									0.999952	0.999889	0.999971	0.999975	-1.11585	1.08081	-1.02416	-1.03091
4210731	1	193130679	193130728	-									0.999952	0.999889	0.999971	0.999975	-1.04118	-1.05391	1.03389	-1.12714
101410022	1	193176815	193176864	-									0.999952	0.999889	0.999971	0.999975	1.1714	1.03585	-1.07287	-1.15172
1990497	1	193176828	193176877	-									0.999952	0.999889	0.999971	0.999975	1.17252	-1.07857	-1.04097	-1.12347
7040440	1	193446218	193446267	+									0.999952	0.999889	0.999971	0.999975	1.03636	-1.07866	1.00465	-1.11329
105670162	1	193607855	193607904	+									0.999952	0.999889	0.999971	0.999975	-1.04708	1.04528	1.07291	1.04575
3120068	1	193733701	193733750	+									0.999952	0.999889	0.999971	0.999975	1.06702	-1.04681	-1.10806	-1.05695
101410551	1	193736855	193736904	+									0.999952	0.999889	0.999971	0.999975	1.01998	1.17061	-1.10412	-1.03903
6660181	1	194330787	194330836	+									0.000744753	0.873261	1.23e-05	0.0317767	-4.41215	-2.24212	-6.43793	-2.99718
130593	1	194671172	194671221	-									0.0513412	0.999889	0.239565	0.0612624	-2.21311	-1.56915	-1.92839	-2.17196
5270014	1	194930813	194930862	-									0.999952	0.999889	0.999971	0.999975	1.02838	1.04434	1.05085	-1.01815
4210673	1	194933662	194933711	-									0.999952	0.999889	0.999971	0.999975	-1.00225	1.00588	-1.01943	-1.04289
1990026	1	194939989	194940038	-									0.999952	0.999889	0.999971	0.999975	1.02778	1.00355	-1.04351	-1.00294
5290497	1	195002224	195002273	+									0.999952	0.999889	0.999971	0.999975	1.02306	-1.00285	-1.05517	-1.06488
450066	1	195048156	195048205	-									0.999952	0.999889	0.999971	0.999975	1.15732	1.27846	1.20276	1.11999
5550408	1	195049887	195049936	-									0.999952	0.999889	0.999971	0.999975	1.12184	1.28466	1.18876	1.11388
6550020	1	195098646	195098695	-									0.999952	0.999889	0.999971	0.999975	-1.09693	-1.03668	1.05901	1.09474
7100301	1	195169793	195169842	+									0.999952	0.999889	0.999971	0.999975	-1.17376	-1.32891	1.08122	-1.07687
1190037	1	195172894	195172943	-									0.999952	0.999889	0.999971	0.999975	-1.17944	-1.00314	1.07187	-1.01544
100380373	1	196506522	196506571	+									0.999952	0.999889	0.999971	0.999975	-1.03912	1.00953	1.01255	-1.07958
6450132	1	196638623	196638672	+									0.999952	0.999889	0.999971	0.999975	1.04227	-1.03002	-1.04221	-1.06882
6650270	1	196787331	196787380	+									0.999952	0.999889	0.999971	0.999975	-1.06496	-1.03102	1.12691	-1.05973
107000722	1	196842267	196842316	+									0.999952	0.999889	0.999971	0.999975	1.13605	1.05725	1.10907	-1.11101
105290041	1	196863114	196863163	-									0.999952	0.999889	0.999971	0.999975	-1.06097	-1.08554	-1.01426	-1.02632
100430603	1	196863331	196863380	-									0.999952	0.999889	0.999971	0.999975	-1.14411	-1.0937	1.05117	-1.03842
2370086	2	3144914	3144963	+									0.999952	0.999889	0.999971	0.999975	-1.01781	1.02639	-1.02385	-1.05587
107100594	2	3224184	3224233	+									0.999952	0.999889	0.999971	0.999975	1.09309	-1.08442	1.01968	-1.12768
2450164	2	3246608	3246657	-									0.999952	0.999889	0.999971	0.999975	-1.08259	-1.06882	1.01738	-1.0089
3060563	2	3326411	3326460	-									0.999952	0.999889	0.999971	0.999975	1.08677	-1.12014	-1.02109	-1.07921
3520093	2	3699057	3699106	+									0.999952	0.999889	0.999971	0.999975	-1.09031	-1.05438	1.04178	-1.01932
102900176	2	4337181	4337230	+									0.999952	0.999889	0.999971	0.999975	-1.06359	-1.04072	1.07858	-1.02144
100520433	2	4354354	4354403	+									0.999952	0.999889	0.999971	0.999975	-1.02826	-1.00016	-1.0322	-1.05615
100870546	2	4458592	4458641	+									0.999952	0.999889	0.999971	0.867349	-1.0283	-1.0328	1.02317	-1.21919
105910551	2	4459708	4459757	+									0.999952	0.999889	0.999971	0.999975	1.11325	1.0875	1.0081	-1.05158
2190176	2	4534845	4534894	+									0.426693	0.999889	0.999971	0.642324	-1.2992	-1.15693	-1.10717	-1.27101
4230725	2	4831402	4831451	+									0.999952	0.999889	0.999971	0.999975	1.03837	1.01585	-1.02601	-1.11908
7000441	2	5151809	5151858	+									0.49735	0.999889	0.999971	0.999975	1.70468	1.16319	-1.00042	1.05386
101230692	2	5215003	5215052	-									0.999952	0.999889	0.999971	0.999975	1.18025	1.02314	1.08961	-1.01861
1660100	2	5218078	5218127	-									0.287383	0.999889	0.999971	0.999975	1.3251	-1.07748	1.17648	-1.03535
105080687	2	5475302	5475351	-									0.999952	0.999889	0.999971	0.999975	1.02595	1.09826	1.07956	-1.06867
3710035	2	5715752	5715801	-									0.999952	0.999889	0.999971	0.999975	-1.08442	-1.09892	-1.03294	-1.11807
6940408	2	5789172	5789221	+									0.999952	0.999889	0.999971	0.618351	-1.18343	-1.03294	-1.23724	-1.36071
2260168	2	5792236	5792285	-									0.821131	0.999889	0.999971	0.999975	-1.30855	1.00998	-1.1116	-1.11712
4810471	2	5977675	5977724	+									0.999952	0.999889	0.999971	0.999975	-1.09103	1.07544	1.04378	-1.0654
106590047	2	6364673	6364722	+									0.999952	0.999889	0.999971	0.999975	1.00979	1.07479	1.0301	-1.04267
6180121	2	6463017	6463066	-									0.999952	0.999889	0.999971	0.999975	-1.00098	-1.12344	1.02956	1.04099
6840139	2	6466046	6466095	-									0.999952	0.999889	0.999971	0.999975	1.30836	-1.13987	1.215	1.04066
102940070	2	6527523	6527572	-									0.999952	0.999889	0.999971	0.999975	1.17594	-1.09666	-1.03173	-1.02153
103610113	2	6529334	6529383	-									0.999952	0.999889	0.999971	0.999975	1.02362	-1.16301	1.03155	1.05588
106020100	2	6544840	6544889	-									0.999952	0.999889	0.999971	0.999975	1.20241	-1.11364	1.07885	-1.07003
104150170	2	6707594	6707643	-									0.918838	0.999889	0.999971	0.999975	1.22777	-1.11713	1.07225	1.05735
105050193	2	6871588	6871637	-									0.439051	0.999889	0.999971	0.999975	1.49895	-1.00377	1.19587	1.24784
103290605	2	9970695	9970744	+									0.999952	0.999889	0.999971	0.999975	1.06273	1.15785	-1.08689	-1.0677
5910601	2	9980652	9980701	-									0.999952	0.999889	0.999971	0.999975	-1.0132	1.18098	-1.07276	-1.05515
6550014	2	10013754	10013803	+									0.999952	0.999889	0.999971	0.999975	1.0695	-1.26924	1.07305	-1.02571
104060403	2	10516292	10516341	+									0.880681	0.999889	0.999971	0.0689582	-1.18408	-1.08743	1.21874	-1.40317
630706	2	11393940	11393989	-									0.999952	0.999889	0.999971	0.999975	1.01083	-1.08832	1.01022	-1.1092
870592	2	11507481	11507530	-									0.999952	0.999889	0.999971	0.999975	-1.03145	-1.02123	-1.06321	-1.12298
1240731	2	11664449	11664498	-									0.999952	0.999889	0.999971	0.999975	-1.11902	1.03889	-1.04285	-1.04703
130136	2	11711803	11711852	+									0.984643	0.999889	0.999971	0.999975	1.15654	1.00603	-1.00606	-1.10389
4050086	2	12028753	12028802	-									0.999952	0.999889	0.999971	0.999975	-1.07196	1.04772	1.03113	1.18809
100110053	2	12171461	12171510	-									0.999952	0.999889	0.999971	0.999975	1.08939	1.15489	-1.04074	1.08525
107040008	2	12321340	12321389	-									0.999952	0.999889	0.999971	0.999975	-1.01735	-1.04119	-1.00727	1.01886
103390072	2	12923752	12923801	-									0.760818	0.999889	0.999971	0.999975	1.18672	1.04007	1.10066	-1.09195
100130017	2	12924924	12924973	+									0.999952	0.999889	0.999971	0.999975	1.13028	1.17028	1.19402	-1.00407
5420546	2	12926004	12926053	-									0.951217	0.999889	0.999971	0.999975	1.32986	-1.58063	-1.14542	1.07378
20431	2	13503301	13503325	+	2	13504100	13504124	+					0.940169	0.999889	0.999971	0.999975	-1.25826	-1.15348	-1.11866	-1.06019
5340180	2	13966430	13966479	-									0.999952	0.999889	0.999971	0.999975	-1.07286	-1.04672	1.012	-1.24254
101690162	2	14373648	14373697	+									0.999952	0.999889	0.999971	0.999975	-1.09431	-1.03803	-1.06336	1.01767
106980341	2	14625998	14626047	+									0.999952	0.999889	0.999971	0.999975	1.14237	-1.01731	-1.06342	1.06981
104570408	2	14885242	14885291	+									0.999952	0.999889	0.999971	0.999975	-1.03289	-1.09864	-1.04826	-1.21149
1500095	2	14908345	14908394	+									0.999952	0.999889	0.999971	0.999975	1.0715	-1.10569	-1.15922	-1.01421
102030524	2	17264948	17264997	-									0.999952	0.999889	0.999971	0.999975	-1.04255	1.02866	-1.07148	-1.07649
2480286	2	17451564	17451613	-									0.999952	0.999889	0.999971	0.999975	1.13979	-1.03311	-1.00521	-1.02742
106550152	2	17649714	17649763	-									0.999952	0.999889	0.999971	0.999975	-1.03556	-1.08584	-1.05909	-1.05982
100050601	2	18230374	18230421	-									0.999952	0.999889	0.999971	0.999975	-1.08387	-1.0571	-1.11106	-1.11955
2510259	2	18597552	18597601	+									0.999952	0.999889	0.999971	0.999975	-1.05692	1.05093	1.00527	-1.02295
2630204	2	18607799	18607848	+									0.999952	0.999889	0.999971	0.999975	-1.01465	1.07424	1.00234	-1.22271
5220497	2	18763907	18763956	-									1.92e-06	0.00142249	3.04e-05	6.85e-05	-3.52866	-2.85777	-3.03809	-2.90962
1410601	2	19231702	19231751	+									0.999952	0.999889	0.999971	0.995751	1.04349	1.02019	-1.00821	1.25149
3940338	2	19316007	19316056	+									0.999952	0.999889	0.999971	0.618351	-1.11178	-1.30746	-1.43077	-1.46381
103850605	2	19581086	19581135	+									0.999952	0.999889	0.999971	0.999975	1.07443	-1.07915	-1.07935	1.00009
103290286	2	19932884	19932933	+									0.107702	0.431993	3.41e-06	0.999975	1.82297	1.81791	3.51815	1.23698
1340100	2	20732040	20732089	+									0.999952	0.999889	0.999971	0.999975	1.12523	1.05819	1.05513	-1.21146
2100168	2	20769597	20769646	-									0.999952	0.999889	0.999971	0.999975	1.00477	1.03058	1.09587	-1.02429
104480528	2	21135032	21135081	+									0.118358	0.999889	0.999971	0.484218	-1.39256	-1.15333	-1.20346	-1.29073
102630148	2	21751899	21751948	+									0.999952	0.999889	0.999971	0.999975	1.02998	1.16342	-1.09233	-1.02643
104670039	2	22549035	22549084	+									0.999952	0.999889	0.999971	0.999975	-1.27885	-1.02566	-1.12616	-1.0055
2850152	2	22796121	22796170	-									0.999952	0.999889	0.999971	0.999975	-1.01193	-1.10667	1.00481	-1.19878
6020600	2	22931058	22931107	+									0.0760648	0.999889	0.999971	0.999975	-1.84081	-1.23388	-1.00392	-1.01989
2360102	2	23054005	23054054	+									0.999952	0.999889	0.999971	0.999975	-1.07393	-1.11458	1.04181	-1.06239
3360347	2	23257259	23257308	+									0.999952	0.999889	0.999971	0.999975	-1.04743	-1.04512	-1.0327	1.02231
6980014	2	24646548	24646597	-									0.999952	0.999889	0.999971	0.999975	-1.06331	1.02424	-1.0261	-1.15289
5910086	2	24647820	24647869	-									0.999952	0.999889	0.999971	0.999975	-1.00074	-1.1486	-1.11036	-1.01441
5290433	2	24732997	24733046	-									0.0430058	0.999889	0.999971	0.999975	-2.11582	-1.18732	1.06837	-1.24039
103830731	2	24912058	24912107	+									0.880681	0.999889	0.999971	0.999975	-1.2322	-1.06833	-1.02229	-1.11802
104070039	2	24913489	24913490	+	2	24913773	24913820	+					0.999952	0.999889	0.999971	0.999975	1.1664	-1.15411	-1.06999	1.00136
5910026	2	24918317	24918366	+									0.47541	0.999889	0.999971	0.999975	1.3127	1.00396	1.08873	-1.07608
2630037	2	25038528	25038577	+									0.999952	0.999889	0.999971	0.999975	-1.00157	1.05572	1.09831	1.02166
6840184	2	25056223	25056272	-									0.999952	0.999889	0.999971	0.999975	1.01422	-1.02198	1.03152	-1.15138
3830672	2	25077930	25077979	-									0.999952	0.999889	0.999971	0.999975	-1.14999	1.01395	-1.02278	-1.16431
3360692	2	25099692	25099741	+									0.999952	0.999889	0.999971	0.999975	-1.04378	1.02486	1.0564	-1.02015
4200066	2	25100549	25100598	-									0.999952	0.999889	0.999971	0.999975	1.11578	-1.09099	-1.0046	-1.08934
103190044	2	25102768	25102817	-									0.999952	0.999889	0.999971	0.999975	1.03015	1.112	-1.05017	-1.06884
5900204	2	25111717	25111766	+									0.999952	0.999889	0.999971	0.999975	1.12169	1.02163	-1.02731	1.02234
2370347	2	25125228	25125277	+									0.999952	0.999889	0.999971	0.999975	-1.14033	1.16253	1.03199	1.11106
360593	2	25126842	25126891	-									0.999952	0.999889	0.999971	0.999975	-1.08234	1.09258	-1.04345	-1.00962
6660438	2	25141038	25141087	+									0.774897	0.999889	0.999971	0.999975	-1.19065	1.02551	1.01457	-1.03294
4200156	2	25207470	25207519	+									0.999952	0.999889	0.999971	0.999975	-1.19387	1.03825	1.11579	-1.07905
4230520	2	25207841	25207890	-									0.999952	0.999889	0.999971	0.628113	1.03384	-1.08698	-1.08303	-1.32226
1230372	2	25217021	25217070	-									0.999952	0.999889	0.999971	0.999975	-1.08116	1.10727	-1.02747	1.02057
4590739	2	25256650	25256699	+									0.999952	0.999889	0.862666	0.999975	-1.10972	1.12669	1.33395	1.07413
2100445	2	25264460	25264509	+									0.999952	0.999889	0.999971	0.999975	-1.06297	-1.10013	1.00735	-1.08897
5050039	2	25303509	25303558	+									0.000111556	0.000473562	6.65e-06	5.46e-07	2.82259	3.10518	3.32184	3.7715
3390397	2	25315109	25315158	-									0.896548	0.999889	0.999971	0.999975	-1.26939	1.04339	-1.02017	1.02082
3610519	2	25323375	25323424	-									0.999952	0.999889	0.999971	0.999975	-1.0736	1.76641	-1.27637	1.40028
4810102	2	25360898	25360947	+									0.605684	0.999889	0.231575	0.270217	-1.25832	-1.14958	-1.37871	-1.34962
2640161	2	25416159	25416208	+									0.999952	0.999889	0.999971	0.999975	1.01626	1.05359	1.06909	-1.06699
1660035	2	25417533	25417582	+									0.999952	0.999889	0.999971	0.999975	-1.05839	1.00333	1.08081	-1.12335
7050537	2	25429129	25429178	-									0.999952	0.999889	0.999971	0.999975	-1.24495	-1.04264	-1.03544	1.04418
5080671	2	25440850	25440899	-									0.843151	0.999889	0.999971	0.999975	-1.34028	-1.22183	1.00334	1.01166
106510022	2	25475809	25475858	-									0.69484	0.999889	0.999971	0.999975	-1.2183	1.07083	-1.06407	1.03433
104780068	2	25771776	25771825	+									0.999952	0.999889	0.999971	0.827374	1.04002	1.03417	1.00949	-1.18473
5700008	2	25854109	25854158	-									0.999952	0.999889	0.999971	0.999975	-1.08347	-1.04792	1.01538	1.02743
1170300	2	25860872	25860921	-									0.999952	0.999889	0.999971	0.999975	-1.0615	1.05464	-1.11005	-1.08173
103610692	2	25992420	25992469	-									0.999952	0.999889	0.999971	0.999975	1.19505	1.19401	1.05582	-1.04177
103450403	2	26065745	26065794	-									0.999952	0.999889	0.999971	0.999975	-1.00194	-1.10435	-1.14911	-1.11803
2230735	2	26203664	26203713	+									0.999952	0.999889	0.999971	0.999975	1.02683	-1.03127	1.09696	-1.07212
101990711	2	26205991	26206040	-									0.999952	0.999889	0.999971	0.999975	-1.26718	1.09821	-1.10448	-1.0174
2190184	2	26219160	26219209	-									0.999952	0.999889	0.999971	0.999975	-1.09813	1.0356	1.01292	-1.07275
102510253	2	26238806	26238855	-									0.999952	0.999889	0.999971	0.999975	-1.02281	1.07284	-1.14029	-1.13284
770300	2	26239097	26239146	-									0.999952	0.999889	0.999971	0.999975	-1.05122	1.03085	-1.15089	-1.04085
6840408	2	26252361	26252410	+									0.999952	0.999889	0.999971	0.999975	-1.037	1.00102	1.04718	-1.09545
5690280	2	26265158	26265207	-									0.999952	0.999889	0.999971	0.999975	-1.16818	1.01461	1.06133	-1.11098
105670497	2	26289424	26289473	-									0.999952	0.999889	0.999971	0.999975	1.01392	-1.03107	-1.02388	-1.02318
3390114	2	26313589	26313638	-									0.999952	0.999889	0.999971	0.999975	1.08247	-1.01851	1.06256	-1.19039
670170	2	26447736	26447785	+									0.999952	0.999889	0.999971	0.999975	-1.12112	1.05074	1.03026	-1.21971
150113	2	26447992	26448041	+									0.999952	0.999889	0.999971	0.999975	-1.05805	1.03663	1.12251	-1.2094
5270020	2	26491379	26491428	+									0.999952	0.999889	0.999971	0.999975	-1.15459	-1.01883	1.01068	-1.05739
105890600	2	26492842	26492891	-									0.999952	0.999889	0.999971	0.999975	1.12358	-1.07181	-1.00943	1.00074
104010440	2	26744183	26744232	-									0.999952	0.999889	0.999971	0.999975	-1.02646	-1.052	-1.10377	1.06719
5420458	2	26766577	26766626	+									0.999952	0.999889	0.999971	0.999975	1.0486	-1.04823	1.0641	-1.01229
102190086	2	26767603	26767628	+									0.999952	0.999889	0.999971	0.999975	1.02597	1.01068	-1.01064	1.11843
100430670	2	26768276	26768321	+									0.999952	0.999889	0.999971	0.999975	-1.03174	-1.05332	1.02594	1.07868
102680400	2	26768562	26768577	+	2	26768685	26768716	+					0.999952	0.999889	0.999971	0.999975	-1.05901	1.09507	-1.08353	1.01382
5130048	2	26770964	26771013	-									0.999952	0.999889	0.999971	0.999975	-1.0627	1.00878	-1.03287	-1.14095
2810224	2	26774512	26774561	+									0.999952	0.999889	0.999971	0.999975	1.01311	-1.07542	1.02473	-1.10001
6020315	2	26775697	26775746	-									0.999952	0.999889	0.999971	0.999975	1.02475	-1.08404	1.04219	-1.05933
5690433	2	26871018	26871067	+									0.999952	0.999889	0.999971	0.999975	-1.08302	1.01045	1.00962	-1.01309
105570148	2	26872602	26872651	+									0.999952	0.999889	0.999971	0.999975	-1.09499	-1.0625	1.03345	1.02367
103520193	2	26876364	26876413	+									0.999952	0.999889	0.999971	0.999975	-1.15345	-1.02667	-1.12663	-1.10182
450609	2	26876919	26876968	-									0.999952	0.999889	0.999971	0.999975	1.02716	-1.02045	-1.02017	-1.03012
5340132	2	26964074	26964123	+									0.703689	0.999889	0.999971	0.999975	-1.39237	1.10124	-1.36716	-1.26547
105050551	2	27117655	27117704	-									0.999952	0.999889	0.999971	0.999975	1.01007	1.00083	1.00926	-1.0011
106130369	2	27299529	27299578	+									0.999952	0.999889	0.999971	0.663402	-1.15905	-1.03874	-1.2389	-1.32305
106220484	2	27301213	27301262	-									0.999952	0.999889	0.999971	0.999975	-1.22247	-1.14814	-1.13351	-1.09795
6130672	2	27303370	27303419	-									0.999952	0.999889	0.999971	0.999975	1.08724	-1.06113	1.01157	-1.1557
4150736	2	27391750	27391799	+									0.999952	0.999889	0.999971	0.999975	1.04492	-1.05661	-1.01888	-1.08181
2230050	2	27892889	27892938	+									0.188102	0.999889	0.999971	0.999975	1.35252	1.10157	1.05058	-1.02316
3360161	2	28061209	28061251	+									0.999952	0.999889	0.999971	0.999975	1.29781	1.00118	1.04023	1.17514
105080593	2	28069664	28069713	+									0.999952	0.999889	0.999971	0.999975	1.09664	1.11053	-1.02987	1.07591
5570066	2	28085714	28085763	+									0.999952	0.999889	0.999971	0.999975	-1.0139	1.18034	1.00187	-1.01189
2480128	2	28320663	28320712	-									0.999952	0.999889	0.999971	0.999975	-1.17603	-1.16275	-1.07542	-1.06638
5860725	2	28326276	28326325	+									0.999952	0.999889	0.963044	0.999975	1.02272	-1.09152	-1.20677	-1.12938
4540280	2	28422261	28422310	-									0.999952	0.999889	0.999971	0.999975	-1.09123	-1.00414	1.02483	-1.02784
103610746	2	28528862	28528911	+									0.999952	0.999889	0.999971	0.999975	1.05726	-1.1299	1.01144	-1.08179
106130164	2	28546605	28546654	+									0.999952	0.999889	0.999971	0.999975	1.05066	-1.06273	1.07342	-1.05878
5220047	2	28668447	28668496	+									0.999952	0.999889	0.999971	0.999975	1.07738	1.09016	1.10355	-1.13953
4730114	2	28681174	28681223	-									0.999952	0.999889	0.999971	0.999975	1.01474	-1.0039	-1.00776	-1.01358
6450039	2	28941935	28941984	+									0.999952	0.999889	0.999971	0.999975	-1.09195	1.03035	1.03504	1.02014
2630050	2	29037856	29037905	+									0.999952	0.999889	0.999971	0.999975	1.09471	-1.05766	-1.02712	-1.082
101990300	2	29068291	29068340	-									0.977797	0.999889	0.999971	0.999975	1.16771	1.15376	1.00946	1.00145
104780142	2	29100684	29100733	-									0.999952	0.999889	0.999971	0.999975	-1.01842	1.11546	1.03734	1.00713
1450546	2	29380074	29380123	+									0.999952	0.999889	0.999971	0.999975	-1.13237	-1.01057	-1.04512	-1.07065
100730647	2	29595786	29595835	+									0.999952	0.999889	0.999971	0.999975	1.00924	1.11629	-1.06658	-1.08787
4570019	2	29632006	29632055	-									0.999952	0.999889	0.999971	0.999975	-1.15305	1.01862	-1.06976	-1.10727
4920369	2	29700446	29700495	+									0.999952	0.999889	0.999971	0.999975	-1.03849	-1.07514	1.0421	-1.07844
102060392	2	29724477	29724526	-									0.999952	0.999889	0.999971	0.999975	1.08426	-1.00604	1.09773	1.02455
780605	2	29738230	29738279	+									0.999952	0.999889	0.999971	0.999975	-1.1167	1.02144	1.13643	-1.14294
104150039	2	29774327	29774376	+									0.999952	0.999889	0.999971	0.999975	1.11237	-1.06227	-1.11375	-1.14299
4150484	2	29776601	29776628	+	2	29777733	29777754	+					0.999952	0.999889	0.999971	0.999975	-1.16923	1.03502	1.03802	-1.20061
6940121	2	29777934	29777983	+									0.999952	0.999889	0.999971	0.999975	-1.14604	1.04822	1.13869	-1.01925
102810440	2	29786023	29786072	+									0.999952	0.999889	0.999971	0.999975	1.02311	-1.01217	-1.01482	-1.1069
3850019	2	29814386	29814435	+									0.999952	0.999889	0.999971	0.999975	1.05926	-1.04767	1.03067	-1.04292
106370685	2	29849373	29849422	+									0.900086	0.999889	0.999971	0.999975	-1.36534	-1.30208	-1.03237	-1.19589
101170347	2	29886821	29886870	+									0.999952	0.999889	0.999971	0.999975	-1.06663	1.12468	-1.031	1.00441
6100215	2	29887381	29887430	-									0.999952	0.999889	0.999971	0.999975	-1.15389	1.01203	-1.05086	-1.12394
105690373	2	29925775	29925820	+									0.999952	0.999889	0.999971	0.999975	1.04623	-1.13935	-1.14829	1.16251
100360082	2	29926957	29927004	+									0.999952	0.999889	0.999971	0.999975	1.18604	1.15715	1.13834	-1.07496
3450377	2	29946514	29946563	-									0.999952	0.999889	0.999971	0.999975	1.00014	1.10175	1.04895	-1.08277
580524	2	29952835	29952884	-									0.999952	0.999889	0.999971	0.999975	-1.00676	1.04094	1.0617	-1.09787
107100300	2	29961488	29961537	-									0.999952	0.999889	0.999971	0.999975	1.00625	-1.14357	-1.02121	-1.05983
104670154	2	29962032	29962081	-									0.49735	0.999889	0.999971	0.999975	-1.2593	-1.18608	-1.02767	-1.08744
870010	2	30007288	30007337	+									0.999952	0.999889	0.999971	0.999975	-1.21114	-1.06867	1.05719	-1.09825
3610735	2	30029228	30029277	+									0.999952	0.999889	0.999971	0.999975	-1.15935	1.02887	1.01161	-1.07881
2350082	2	30041732	30041781	-									0.999952	0.999889	0.999971	0.999975	1.07525	-1.26082	-1.07645	-1.03578
102760010	2	30118915	30118964	+									0.807159	0.999889	0.999971	0.999975	-1.25555	1.05743	-1.09925	-1.0409
2510193	2	30136570	30136619	+									0.999952	0.999889	0.999971	0.999975	1.00128	-1.02892	1.02916	-1.17585
5220524	2	30139967	30140016	-									0.999952	0.999889	0.999971	0.999975	-1.14806	-1.0093	-1.04079	-1.11349
2030086	2	30200727	30200776	-									0.999952	0.999889	0.999971	0.999975	1.00753	1.03124	1.08802	-1.01966
5720707	2	30240817	30240866	+									0.999952	0.999889	0.999971	0.999975	-1.1327	1.06819	1.06148	-1.09703
6400053	2	30255835	30255884	+									0.999952	0.999889	0.999971	0.999975	-1.05701	-1.11881	1.05131	-1.09502
540020	2	30257849	30257898	-									0.999952	0.999889	0.999971	0.999975	-1.06242	1.08632	1.04496	-1.03689
670280	2	30303120	30303169	+									0.999952	0.999889	0.999971	0.999975	-1.16192	-1.02521	1.0361	-1.06908
2450154	2	30327375	30327424	-									0.999952	0.999889	0.999971	0.999975	1.22403	1.28655	1.23099	1.11643
450670	2	30677942	30677991	+									0.999952	0.999889	0.999971	0.999975	1.07946	1.0044	1.08467	-1.10138
3850092	2	30678932	30678981	-									0.999952	0.999889	0.999971	0.999975	-1.09363	-1.06486	-1.02941	1.01853
1050390	2	30813658	30813707	+									0.999952	0.999889	0.999971	0.999975	-1.17271	-1.26124	1.0179	-1.08205
107040487	2	30814342	30814391	+									0.999952	0.999889	0.999971	0.999975	-1.04778	1.09641	-1.15447	-1.10838
670139	2	30816251	30816300	-									0.999952	0.999889	0.999971	0.999975	-1.06924	-1.08471	1.00506	-1.00506
5890288	2	30819014	30819063	-									0.999952	0.999889	0.999971	0.999975	1.00793	-1.01899	-1.08053	-1.04777
520128	2	30878089	30878138	+									0.999952	0.999889	0.999971	0.859019	1.01027	1.01853	1.06479	-1.16496
100770156	2	30881815	30881864	-									0.999952	0.999889	0.999971	0.999975	-1.14162	1.05084	-1.02536	1.03968
104760458	2	30885163	30885212	-									0.999952	0.999889	0.999971	0.56762	1.07863	1.17535	1.07659	1.23946
7050131	2	31071746	31071795	+									0.999952	0.999889	0.999971	0.999975	-1.13641	-1.01381	-1.08456	-1.1083
3140039	2	31150806	31150855	+									0.988236	0.999889	0.999971	0.999975	-1.24449	1.02224	1.00599	1.02635
102030164	2	31151332	31151381	+									0.536925	0.999889	0.999971	0.999975	-1.25653	1.17549	-1.11798	-1.0195
1580632	2	31376010	31376059	+									0.270921	0.999889	0.999971	0.999975	-1.38659	-1.00934	1.04133	-1.06682
102030041	2	31472839	31472888	+									0.999952	0.999889	0.999971	0.999975	1.08262	1.17567	1.01138	-1.03901
104230128	2	31536563	31536612	+									0.846679	0.999889	0.999971	0.999975	-1.25366	-1.05663	-1.14876	-1.16478
1500500	2	31668838	31668887	-									0.999952	0.999889	0.323174	0.648415	1.09772	1.281	1.47305	1.35477
3520372	2	31828726	31828775	+									0.999952	0.999889	0.999971	0.999975	1.06051	1.10168	1.14744	1.04853
105900524	2	31906635	31906668	+	2	31907294	31907309	+					0.999952	0.999889	0.999971	0.999975	1.13246	1.18928	1.18508	1.06174
6110164	2	31922471	31922520	-									0.627403	0.999889	0.999971	0.999975	1.25897	1.29883	1.07535	1.08532
1500086	2	32089925	32089974	+									0.999952	0.999889	0.999971	0.999975	1.04796	1.07174	1.13113	-1.00802
5130725	2	32110537	32110586	-									0.999952	0.999889	0.999971	0.999975	1.02041	-1.17958	-1.03427	-1.14688
510333	2	32134454	32134503	-									0.999952	0.999889	0.999971	0.999975	-1.10761	-1.03405	1.03687	-1.05138
6520746	2	32147627	32147676	+									0.412962	0.999889	0.999971	0.999975	-1.57014	-1.11083	-1.01517	-1.10811
6510537	2	32163306	32163355	+									0.999952	0.999889	0.999971	0.999975	-1.0325	1.02941	-1.02274	-1.08153
5340519	2	32164480	32164529	-									0.999952	0.999889	0.999971	0.999975	-1.19009	-1.08547	1.04412	1.01936
4150128	2	32233724	32233773	+									0.999952	0.999889	0.999971	0.999975	1.02123	-1.08699	-1.09928	-1.16475
6250576	2	32234748	32234797	-									0.999952	0.999889	0.999971	0.999975	-1.21326	1.17575	-1.04505	-1.03546
4210097	2	32258002	32258051	+									0.999952	0.999889	0.999971	0.999975	-1.04095	1.0299	1.07124	1.03359
1230605	2	32270257	32270306	-									0.999952	0.999889	0.999971	0.999975	1.03955	-1.07606	1.00627	-1.18945
6900075	2	32425134	32425183	+									0.999952	0.999889	0.999971	0.999975	1.01715	1.0638	1.03632	-1.04493
3610253	2	32428997	32429046	+									0.999952	0.999889	0.999971	0.999975	1.04947	1.03365	1.04963	-1.04725
4920068	2	32451265	32451314	+									0.999952	0.999889	0.999971	0.999975	-1.14546	-1.01066	1.00575	-1.01879
130605	2	32490205	32490254	+									0.999952	0.999889	0.999971	0.999975	1.08781	-1.0639	1.12464	1.02822
4280270	2	32537324	32537373	+									0.999952	0.999889	0.999971	0.557646	-1.10376	-1.14824	-1.04074	-1.27533
630707	2	32563655	32563704	-									0.999952	0.999889	0.999971	0.999975	1.07678	-1.13811	1.06351	-1.06674
1400026	2	32617383	32617432	+									0.999952	0.999889	0.999971	0.999975	-1.04314	1.05414	1.12555	-1.04288
104560133	2	32633000	32633049	-									0.999952	0.999889	0.999971	0.999975	-1.04323	1.10315	1.01077	1.20543
6220717	2	32643520	32643569	-									0.999952	0.999889	0.999971	0.999975	-1.08009	1.06828	1.04105	-1.04982
360072	2	32651560	32651609	-									0.558828	0.999889	0.999971	0.999975	-1.54116	-1.36638	-1.14795	-1.2648
580193	2	32780677	32780726	+									0.999952	0.999889	0.999971	0.999975	-1.0281	1.16137	1.04236	-1.11487
2510603	2	32780766	32780815	-									0.999952	0.999889	0.999971	0.999975	-1.05924	1.00465	1.08097	-1.03586
7100750	2	32818536	32818585	+									0.999952	0.999889	0.999971	0.999975	1.06035	1.08105	1.09499	-1.01143
105220280	2	32818841	32818890	+									0.999952	0.999889	0.999971	0.999975	-1.18282	-1.08692	-1.08118	-1.02475
2120278	2	32828760	32828809	-									0.999952	0.999889	0.963044	0.999975	-1.06385	1.05226	1.21495	1.08277
6380131	2	32841966	32842015	-									0.999952	0.999889	0.999971	0.999975	1.10962	1.07008	1.15985	-1.04168
102340427	2	32989148	32989197	-									0.942509	0.999889	0.999971	0.999975	1.2162	1.21572	1.12968	1.05898
2260181	2	33309192	33309241	-									0.351821	0.999889	0.539392	0.999975	-1.35742	-1.29592	-1.35476	-1.21801
5900725	2	33585813	33585862	-									0.999952	0.999889	0.999971	0.999975	1.02771	1.00107	1.13417	1.05363
101740673	2	33729302	33729351	-									0.141111	0.152229	0.34545	0.0236191	1.54585	1.69617	1.47939	1.729
102900204	2	34194800	34194849	-									0.811776	0.999889	0.999971	0.999975	1.23854	1.09569	1.01877	1.0034
1660161	2	34479020	34479069	+									0.999952	0.999889	0.999971	0.999975	1.12965	-1.00391	1.02249	1.03664
2450575	2	34479304	34479353	+									0.999952	0.999889	0.999971	0.999975	1.01755	1.12016	1.06819	1.01365
104540270	2	34480120	34480169	+									0.999952	0.999889	0.999971	0.999975	-1.0881	1.05377	-1.18049	-1.09168
1660524	2	34532665	34532714	-									0.999952	0.999889	0.999971	0.999975	1.05567	-1.05248	1.10223	-1.16819
5130671	2	34631670	34631719	+									0.999952	0.999889	0.999971	0.88514	-1.05662	-1.04939	-1.06369	-1.18872
104210288	2	34667488	34667537	-									0.999952	0.999889	0.999971	0.999975	-1.13286	-1.0214	-1.01627	-1.11668
101410132	2	34667855	34667901	-									0.404161	0.999889	0.999971	0.155865	-1.25304	-1.01151	-1.18674	-1.32557
6860139	2	35037709	35037758	-									0.999952	0.999889	0.999971	0.999975	1.10544	-1.06139	1.00725	-1.09192
102100133	2	35043426	35043475	-									0.999952	0.999889	0.999971	0.999975	1.10545	-1.03922	1.02317	-1.19218
1450671	2	35169634	35169683	-									0.172206	0.999889	0.42223	0.0621909	-1.44246	-1.34175	-1.38762	-1.53484
3170064	2	35586363	35586412	+									0.999952	0.999889	0.999971	0.999975	1.07456	1.06353	1.11652	-1.09995
3460491	2	35899917	35899966	-									0.999952	0.999889	0.999971	0.999975	-1.11044	1.01888	-1.0386	-1.04936
4210008	2	35910538	35910587	+									0.999952	0.999889	0.999971	0.999975	1.10175	-1.11775	1.02426	1.01027
2900600	2	35935045	35935094	+									0.999952	0.999889	0.999971	0.999975	1.07923	-1.08638	-1.2096	1.00966
6660411	2	35971860	35971909	-									0.999952	0.999889	0.999971	0.999975	-1.02518	-1.01754	-1.04301	-1.0874
6400086	2	37230880	37230929	-									0.999952	0.999889	0.999971	0.999975	1.27748	1.032	1.02098	-1.27823
100840047	2	37243579	37243628	-									0.276683	0.62199	0.406553	0.211937	-1.3476	-1.39538	-1.34759	-1.38298
6520152	2	37374673	37374722	+									0.999952	0.999889	0.999971	0.999975	1.07655	1.0349	1.0713	1.04958
106380079	2	37414974	37415023	+									0.999952	0.999889	0.999971	0.999975	1.11385	1.02132	1.08065	-1.11654
5050397	2	37421825	37421874	+									0.999952	0.999889	0.999971	0.999975	-1.03783	1.01802	1.00849	-1.06767
104280193	2	37425461	37425510	-									0.793899	0.999889	0.999971	0.999975	1.25332	1.03957	-1.06422	1.05413
4540270	2	37433187	37433236	-									0.999952	0.999889	0.999971	0.999975	-1.07512	-1.04049	-1.03959	-1.05495
105860446	2	37439128	37439177	-									0.999952	0.999889	0.999971	0.999975	1.02977	1.14639	1.00249	-1.0367
106590110	2	37439268	37439317	-									0.999952	0.999889	0.999971	0.999975	1.00118	1.08441	-1.0593	-1.04329
104780605	2	37466330	37466379	-									0.999952	0.999889	0.999971	0.999975	-1.08235	-1.08786	-1.05522	-1.07759
105080181	2	37654396	37654445	+									0.999952	0.999889	0.999971	0.999975	1.11647	1.1976	1.06703	-1.0941
3130280	2	37655115	37655164	-									0.999952	0.999889	0.999971	0.999975	1.02006	-1.10886	1.04147	-1.21882
3610463	2	38224609	38224658	+									0.999952	0.999889	0.999971	0.999975	1.08578	-1.03676	1.06447	1.14253
102480239	2	38446294	38446343	-									0.999952	0.999889	0.999971	0.999975	-1.12486	1.09532	-1.08411	-1.03268
5570088	2	38489404	38489453	-									0.999952	0.999889	0.999971	0.999975	-1.03271	-1.00917	-1.00181	-1.05641
5890647	2	38498891	38498940	-									0.999952	0.999889	0.999971	0.999975	-1.02399	-1.05703	-1.03458	1.0118
6940070	2	38860275	38860324	-									0.999952	0.999889	0.999971	0.999975	1.02923	-1.00206	1.05079	-1.08568
1090148	2	38871075	38871124	+									0.999952	0.999889	0.999971	0.999975	-1.06238	-1.25032	-1.19153	1.00326
5860471	2	38872189	38872238	-									0.999952	0.999889	0.999971	0.999975	-1.04317	-1.00766	1.09829	-1.1663
104920524	2	38922521	38922570	-									0.999952	0.999889	0.999971	0.999975	1.00456	1.1437	1.08334	-1.02392
106940066	2	39050397	39050446	-									0.999952	0.999889	0.999971	0.999975	-1.04624	1.05705	-1.01985	-1.09394
2450670	2	39052476	39052525	-									0.999952	0.999889	0.999971	0.999975	-1.00178	1.02406	1.01837	-1.03962
102470176	2	42506034	42506083	-									0.999952	0.999889	0.999971	0.999975	1.03413	-1.11325	1.02434	1.01879
2900438	2	44178223	44178272	+									0.999952	0.999889	0.999971	0.999975	1.02446	-1.04149	-1.00332	1.03544
4730739	2	44420585	44420634	-									0.999952	0.999889	0.999971	0.999975	1.00341	1.0355	-1.02722	-1.02785
101940592	2	44488729	44488778	-									0.366997	0.999889	0.999971	0.999975	1.28993	-1.00893	1.1362	-1.06276
4150215	2	44843946	44843995	-									0.999952	0.999889	0.999971	0.999975	1.12107	-1.06089	1.05441	-1.03478
103990390	2	44847727	44847776	-									0.459046	0.999889	0.999971	0.999975	1.3443	1.0488	1.00875	1.03372
100730450	2	44864172	44864221	-									0.999952	0.999889	0.999971	0.999975	-1.06593	-1.05823	1.03185	1.15701
104540040	2	44878210	44878259	-									0.999952	0.999889	0.999971	0.999975	1.06119	-1.05592	-1.05618	-1.01487
100450706	2	44929186	44929235	-									0.999952	0.999889	0.999971	0.999975	1.11698	-1.02825	-1.03622	1.02112
100380497	2	44931446	44931495	-									0.999952	0.999889	0.999971	0.999975	1.081	1.00973	1.04217	1.09431
100670301	2	49171921	49171970	+									0.999952	0.999889	0.999971	0.999975	1.06649	-1.06084	-1.03684	-1.04679
102450377	2	49175067	49175116	+									0.999952	0.999889	0.999971	0.999975	1.16417	-1.00993	-1.00324	-1.12858
2470095	2	49406505	49406554	+									0.999952	0.999889	0.999971	0.999975	1.00953	-1.01036	1.05476	-1.17327
6370717	2	49630170	49630219	+									0.999952	0.999889	0.999971	0.999975	-1.09311	1.07487	-1.02507	1.0001
1740685	2	49804193	49804242	+									0.999952	0.999889	0.19236	0.999975	1.0563	1.11909	1.35505	1.12068
1990020	2	50047963	50048012	+									0.0143834	0.0613206	3.72e-06	0.0258423	1.77314	1.81302	2.57734	1.71884
100870152	2	50048832	50048881	+									0.424564	0.999889	0.999971	0.999975	-1.39591	1.07924	-1.08982	-1.111
2340435	2	50146932	50146981	-									0.89801	0.999889	0.999971	0.999975	1.25145	1.10552	1.22425	1.05416
100940538	2	51726581	51726630	-									0.999952	0.999889	0.999971	0.999975	-1.02767	1.04648	-1.06423	1.07641
1580168	2	51780290	51780339	-									0.999952	0.999889	0.999971	0.999975	-1.0953	-1.05282	-1.02436	-1.01705
104120711	2	52284062	52284111	-									0.999952	0.999889	0.999971	0.999975	1.06576	1.03192	1.04441	-1.08471
105890451	2	52729177	52729226	+									0.999952	0.999889	0.999971	0.406434	-1.16976	1.0571	1.09888	-1.38329
4060438	2	52992171	52992220	+									0.999952	0.999889	0.999971	0.999975	-1.27349	1.03245	1.16995	-1.41763
106020541	2	52996440	52996489	-									0.999952	0.999889	0.999971	0.999975	1.08179	-1.09464	-1.07003	-1.01006
1190138	2	52997753	52997802	-									0.999952	0.999889	0.999971	0.999975	1.05677	-1.06044	1.03231	-1.10917
1580706	2	53936662	53936711	-									0.999952	0.999889	0.999971	0.999975	-1.03129	-1.13403	1.31211	-1.02149
104920411	2	56960471	56960520	-									0.688331	0.999889	0.999971	0.999975	1.18129	1.05267	1.04756	1.01657
60273	2	56960685	56960734	-									0.999952	0.999889	0.999971	0.999975	1.17714	1.04615	1.00733	1.01291
2350075	2	57219805	57219854	+									0.999952	0.999889	0.999971	0.999975	1.11083	-1.01113	1.12122	-1.21005
2690411	2	57219938	57219987	+									0.999952	0.999889	0.999971	0.999975	1.01919	-1.11929	-1.06527	1.06674
5890044	2	58124452	58124501	-									0.999952	0.999889	0.999971	0.999975	1.22746	1.1466	1.05996	1.14002
6840671	2	58298950	58298999	-									0.999952	0.999889	0.999971	0.999975	-1.00365	1.06996	1.07862	-1.1119
5890097	2	59175677	59175726	+									0.999952	0.999889	0.999971	0.999975	1.13011	-1.0488	1.09458	1.12652
102970452	2	59188584	59188633	+									0.999952	0.999889	0.999971	0.999975	1.10107	-1.09592	1.01728	1.06392
106940451	2	59193173	59193222	+									0.999952	0.999889	0.999971	0.999975	-1.03079	1.09976	1.05491	1.09811
101050152	2	59522687	59522736	+									0.999952	0.999889	0.999971	0.999975	1.03281	-1.15832	1.13044	-1.00039
100610278	2	59659264	59659313	+									0.999952	0.999889	0.999971	0.999975	1.1687	1.11572	1.03758	-1.00679
3450180	2	59683692	59683741	+									0.999952	0.999889	0.999971	0.999975	1.20855	-1.1005	-1.10496	1.07701
1850717	2	59690855	59690904	-									0.999952	0.999889	0.999971	0.75142	-1.03311	-1.09502	-1.06709	-1.27658
3800020	2	60086247	60086296	+									0.999952	0.999889	0.999971	0.999975	-1.05732	-1.02513	1.04858	-1.00479
104060113	2	60088585	60088634	+									0.999952	0.999889	0.999971	0.999975	1.11268	-1.02739	-1.03251	-1.22515
106400097	2	60289246	60289294	-									0.999952	0.999889	0.999971	0.999975	-1.06633	1.16241	1.03913	1.07489
6400014	2	60600116	60600165	-									0.999952	0.999889	0.999971	0.999975	1.07038	1.01878	1.0701	-1.16898
102350397	2	60744864	60744913	-									0.999952	0.999889	0.999971	0.804314	-1.02006	1.11742	-1.00751	-1.23882
2370400	2	61491529	61491578	+									0.999952	0.999889	0.999971	0.999975	1.00271	1.12058	-1.03509	-1.21649
5690593	2	61638289	61638338	+									0.999952	0.999889	0.999971	0.999975	1.12217	1.03647	-1.02495	-1.05513
5130053	2	61651498	61651547	+									0.999952	0.999889	0.999971	0.999975	1.26187	1.04594	1.08078	1.04133
2120576	2	62531651	62531700	+									0.999952	0.999889	0.999971	0.999975	1.05826	-1.08315	-1.01081	-1.01915
100630372	2	62624608	62624657	-									0.740231	0.999889	0.999971	0.999975	1.21827	1.1104	1.08477	1.03134
7000601	2	63816331	63816380	-									0.999952	0.999889	0.999971	0.822264	1.10592	1.01442	-1.00155	-1.30788
3060369	2	64752804	64752853	-									0.999952	0.999889	0.999971	0.999975	-1.0213	-1.04499	1.08789	1.0389
106100315	2	65298300	65298349	-									0.999952	0.999889	0.999971	0.999975	1.07016	-1.098	1.01812	-1.12836
105670093	2	65603120	65603169	+									0.999952	0.999889	0.999971	0.999975	1.10173	1.00188	-1.03866	1.04735
103120576	2	65603878	65603927	+									0.997011	0.999889	0.999971	0.999975	-1.36735	-1.36522	1.01881	-1.21452
106350279	2	65604252	65604301	+									0.999952	0.999889	0.999971	0.999975	-1.05112	-1.00639	-1.02173	-1.17969
100450348	2	65604774	65604823	+									0.999952	0.999889	0.999971	0.999975	1.12078	-1.04358	1.02916	1.03706
70142	2	66111017	66111066	-									0.966259	0.999889	0.999971	0.999975	-1.32483	-1.014	1.02863	-1.21791
100540139	2	66511747	66511796	-									0.999952	0.999889	0.999971	0.999975	-1.04867	1.07402	-1.16474	-1.0832
102630484	2	67960620	67960669	+									0.999952	0.999889	0.999971	0.999975	1.0496	-1.01096	-1.05389	-1.23308
50692	2	68048719	68048768	-									0.999952	0.999889	0.999971	0.999975	-1.09138	1.12654	1.13878	-1.04163
360040	2	69027256	69027305	+									0.999952	0.999889	0.999971	0.0601387	-1.11851	-1.07947	-1.09702	-1.41305
6480626	2	69505282	69505331	+									0.999952	0.999889	0.999971	0.999975	-1.03337	-1.03369	1.0172	-1.07924
2320037	2	69525136	69525185	-									0.999952	0.999889	0.999971	0.999975	1.0736	-1.08538	-1.01386	-1.07215
6840592	2	69547851	69547900	-									0.999952	0.999889	0.999971	0.999975	1.14084	-1.10565	1.11805	-1.06798
106940139	2	69584089	69584128	+									0.999952	0.999889	0.999971	0.999975	-1.24044	-1.09828	-1.09649	-1.27827
2450286	2	69635029	69635078	+									0.999952	0.999889	0.999971	0.999975	1.06447	-1.00758	1.01255	-1.14894
100450411	2	69709341	69709390	+									0.999952	0.999889	0.999971	0.999975	1.00299	-1.10017	-1.05209	-1.05606
102940692	2	70378844	70378893	+									0.999952	0.999889	0.999971	0.999975	-1.1338	-1.16058	-1.03747	1.08722
101240020	2	70423078	70423127	+									0.566763	0.999889	0.999971	0.999975	-1.46364	1.07531	-1.00459	1.10789
2360035	2	70439446	70439495	+									0.999952	0.999889	0.999971	0.999975	-1.07313	-1.10823	1.04909	1.08116
3140167	2	70439916	70439965	+									0.999952	0.999889	0.999971	0.999975	-1.06805	-1.07696	-1.09113	-1.04678
7040706	2	70526466	70526515	+									0.999952	0.999889	0.999971	0.999975	-1.05948	-1.12432	-1.06471	-1.15404
2970059	2	70529746	70529795	+									0.999952	0.999889	0.999971	0.999975	1.07343	-1.05556	-1.09582	-1.17676
7100605	2	70550620	70550669	-									0.999952	0.999889	0.999971	0.999975	-1.00198	1.16654	1.02071	-1.06066
6760711	2	70802952	70803001	-									0.999952	0.999889	0.999971	0.999975	-1.08266	-1.09484	-1.00221	-1.12882
103290181	2	71049796	71049836	+									0.999952	0.999889	0.999971	0.999975	-1.08631	1.0544	1.0139	1.06897
3360441	2	71100796	71100845	+									0.999952	0.999889	0.999971	0.999975	-1.02914	-1.01216	1.0832	-1.02387
100380040	2	71109447	71109496	-									0.587678	0.999889	0.999971	0.999975	-1.19065	1.06457	1.08792	-1.01378
7400731	2	71112619	71112668	-									0.999952	0.999889	0.999971	0.999975	-1.0068	-1.02362	1.08089	-1.12313
3710082	2	71279413	71279462	+									0.999952	0.999889	0.999971	0.999975	-1.00362	-1.05005	-1.02111	-1.07677
104280152	2	71359913	71359962	+									0.999952	0.999889	0.999971	0.999975	1.08518	-1.01877	1.04524	-1.01975
360168	2	71371638	71371687	+									0.999952	0.999889	0.999971	0.999975	-1.203	1.00792	1.25038	1.05385
4200673	2	71381637	71381686	-									0.999952	0.999889	0.999971	0.999975	-1.05874	1.0463	1.12748	-1.01208
101660647	2	71695970	71696019	+									0.999952	0.999889	0.999971	0.999975	1.11429	1.11094	1.03109	-1.07272
5290427	2	71739490	71739539	+									0.999952	0.999889	0.999971	0.999975	1.15452	1.23038	1.23202	1.15482
103450541	2	71979286	71979335	+									0.0848171	0.999889	0.490354	0.999975	1.50494	1.25434	1.37211	1.19141
1850504	2	72001346	72001395	+									0.23971	0.999889	0.00529324	0.999975	1.47817	1.41991	1.8704	1.25134
3060097	2	72324659	72324708	+									0.999952	0.999889	0.999971	0.999975	1.03195	-1.14293	1.0675	1.14951
1780634	2	72994851	72994900	-									0.880681	0.999889	0.999971	0.999975	-1.36152	-1.15954	1.01876	-1.2597
104670398	2	73036698	73036747	-									0.999952	0.999889	0.999971	0.999975	1.13219	-1.00303	-1.04097	-1.14473
3140403	2	73122312	73122361	-									0.999952	0.999889	0.999971	0.999975	1.08284	-1.11103	1.08372	-1.01954
101940577	2	73179862	73179911	-									0.999952	0.999889	0.999971	0.999975	1.05717	1.03085	-1.06813	1.01336
4230551	2	73746665	73746714	-									0.999952	0.999889	0.999971	0.999975	1.01241	1.00093	-1.0105	-1.00217
102970605	2	74358917	74358966	-									0.999952	0.999889	0.999971	0.999975	1.05841	-1.08057	-1.01005	-1.00818
100130086	2	75538685	75538734	-									0.999952	0.999889	0.999971	0.999975	-1.12463	1.14784	-1.04137	1.04055
6980184	2	75767065	75767114	+									0.999952	0.999889	0.999971	0.999975	-1.14926	-1.0733	1.16324	-1.1511
106650142	2	75774284	75774333	-									0.999952	0.999889	0.999971	0.999975	-1.10073	1.06346	1.05448	-1.15045
3120730	2	76218481	76218530	+									0.999952	0.999889	0.999971	0.999975	1.06033	-1.02113	-1.02917	1.03515
2630112	2	76221654	76221703	+									0.999952	0.999889	0.999971	0.999975	1.01568	-1.08203	-1.00883	-1.13885
105550017	2	76362118	76362167	+									0.999952	0.999889	0.999971	0.999975	1.04869	1.0335	1.0636	-1.1609
3800072	2	76434019	76434068	+									0.150249	0.999889	0.999971	0.999975	-1.62642	-1.40138	-1.02133	-1.22713
102650735	2	76434519	76434568	+									0.999952	0.999889	0.999971	0.999975	-1.09338	1.07251	-1.11693	-1.0842
2510600	2	76468202	76468251	-									0.914922	0.999889	0.999971	0.999975	-1.20075	-1.13704	-1.00615	-1.09548
5080068	2	76534413	76534462	+									0.999952	0.999889	0.999971	0.999975	1.05332	1.01661	1.00217	-1.03684
100050050	2	77018520	77018569	-									0.999952	0.999889	0.999971	0.999975	1.17055	1.04027	1.09665	-1.08918
1090333	2	77024931	77024979	-									0.999952	0.999889	0.999971	0.999975	-1.01247	-1.04797	1.04433	1.01939
2570047	2	77769533	77769582	-									0.0647398	0.999889	0.999971	0.999975	-2.21074	-1.59234	-1.14646	-1.28877
2030347	2	78710653	78710702	+									0.999952	0.999889	0.999971	0.999975	1.02814	-1.05818	-1.08034	1.02726
105670471	2	78726144	78726193	+									0.106429	0.999889	0.999971	0.999975	1.52948	1.17072	1.10607	1.03015
3060619	2	79292820	79292869	-									0.999952	0.999889	0.999971	0.999975	1.03701	1.03384	1.03875	-1.03292
102480095	2	79512566	79512615	+									0.999952	0.999889	0.999971	0.999975	1.17034	1.09687	-1.06823	-1.02964
1050458	2	79705238	79705287	-									0.999952	0.999889	0.999971	0.999975	-1.08721	-1.27279	1.12086	-1.05324
2570563	2	79705263	79705312	-									0.999952	0.999889	0.999971	0.999975	-1.10131	-1.08752	1.2094	-1.12673
6110110	2	80346330	80346335	-	2	80342428	80342471	-					0.999952	0.999889	0.999971	0.999975	-1.15025	-1.23987	-1.18248	-1.57462
6290601	2	80471272	80471321	+									0.913259	0.999889	0.999971	0.999975	-1.22302	-1.2504	-1.26765	-1.22077
105220368	2	80474538	80474587	+									0.999952	0.999889	0.999971	0.999975	-1.07284	-1.00827	-1.03034	-1.17425
1230138	2	83504534	83504583	+									0.999952	0.999889	0.999971	0.999975	1.08213	-1.06086	1.01085	-1.05197
100110411	2	83581986	83582035	+									0.999952	0.999889	0.999971	0.999975	1.07392	1.03617	-1.04542	1.06182
1190022	2	83721300	83721349	+									0.999952	0.999889	0.999971	0.999975	1.07572	-1.03101	-1.0327	-1.19415
106110707	2	84427502	84427551	-									0.999952	0.999889	0.999971	0.999975	1.16865	1.02204	-1.05449	-1.02245
106400139	2	84441180	84441229	-									0.999952	0.999889	0.999971	0.999975	-1.14197	1.00102	-1.16216	-1.04798
101690086	2	84509467	84509516	-									0.999952	0.999889	0.999971	0.999975	-1.1277	-1.04286	-1.09849	-1.04082
6840286	2	84515932	84515981	-									0.999952	0.999889	0.999971	0.999975	1.01506	-1.15705	-1.17695	-1.21238
105550600	2	84518785	84518818	+	2	84525348	84525363	+					0.999952	0.999889	0.999971	0.999975	-1.11756	-1.03775	-1.09626	-1.04078
1690711	2	84528242	84528291	-									0.999952	0.999889	0.999971	0.228713	-1.09916	1.02773	1.01404	-1.23989
103850288	2	84577613	84577662	+									0.999952	0.999889	0.999971	0.999975	1.07749	-1.10158	-1.11836	1.07486
5550440	2	84605748	84605797	-									0.999952	0.999889	0.999971	0.999975	1.0559	1.04325	1.00759	-1.05462
2450601	2	84670084	84670133	+									0.999952	0.999889	0.999971	0.999975	-1.06543	1.00985	-1.01502	-1.12435
7040184	2	84912900	84912949	+									0.999952	0.999889	0.999971	0.999975	-1.15509	-1.08193	-1.03158	1.02534
104670239	2	85028326	85028375	-									0.999952	0.999889	0.999971	0.999975	1.04963	1.09045	-1.08892	-1.20931
3850110	2	85514851	85514900	-									0.999952	0.999889	0.999971	0.999975	-1.06861	-1.00726	-1.00028	-1.01903
1990551	2	90575970	90576019	+									0.977797	0.999889	0.999971	0.999975	1.16401	1.01306	-1.01485	-1.02104
1740139	2	90620721	90620770	+									0.999952	0.999889	0.999971	0.999975	-1.0782	-1.05007	1.02421	-1.06942
102690114	2	90655930	90655979	+									0.999952	0.999889	0.999971	0.999975	-1.00748	-1.00191	1.03267	-1.01341
6620215	2	90687449	90687498	+									0.999952	0.999889	0.999971	0.999975	-1.05134	-1.10674	-1.0506	-1.12037
3780603	2	90706296	90706345	+									0.999952	0.999889	0.999971	0.999975	-1.04282	1.02739	1.01836	-1.16936
60619	2	90730244	90730293	+									0.999952	0.999889	0.999971	0.999975	1.01834	1.02887	1.0679	-1.0444
5340528	2	90738836	90738885	-									0.999952	0.999889	0.999971	0.999975	-1.0667	1.04564	1.06596	-1.02837
1690136	2	90744811	90744860	-									0.999952	0.999889	0.999971	0.999975	1.06067	-1.10895	-1.0249	-1.06727
4610047	2	90751396	90751445	-									0.999952	0.999889	0.999971	0.999975	-1.11698	1.11308	1.01276	-1.10271
103390025	2	90758337	90758386	+									0.999952	0.999889	0.999971	0.999975	-1.20155	1.02375	-1.03857	-1.04779
106130215	2	90811018	90811067	+									0.999952	0.999889	0.999971	0.999975	-1.08395	-1.26676	-1.04695	1.04399
7050176	2	90857077	90857126	+									0.999952	0.999889	0.999971	0.896624	-1.03468	1.0235	-1.1063	-1.18107
2480184	2	90899210	90899259	+									0.999952	0.999889	0.999971	0.999975	-1.11799	1.02943	-1.01151	-1.03229
104730739	2	90902080	90902129	-									0.722336	0.999889	0.999971	0.999975	-1.24703	1.13146	-1.16454	1.00428
1990369	2	91052024	91052073	+									0.999952	0.999889	0.999971	0.887285	-1.0456	-1.02422	-1.04058	-1.20275
4850184	2	91052034	91052083	-									0.999952	0.999889	0.999971	0.999975	-1.02493	-1.03777	1.01822	-1.05315
104780162	2	91052747	91052796	+									0.999952	0.999889	0.999971	0.999975	-1.02703	-1.04657	1.01338	-1.12971
4540400	2	91104596	91104645	+									0.999952	0.999889	0.999971	0.999975	-1.15194	-1.03429	1.04344	-1.0392
3870711	2	91115966	91116015	+									0.999952	0.999889	0.999971	0.999975	1.05247	-1.0993	1.01709	-1.0242
5340373	2	91116851	91116900	+									0.999952	0.999889	0.999971	0.999975	-1.17585	1.0702	1.05169	-1.0437
102650044	2	91139205	91139254	-									0.999952	0.999889	0.999971	0.999975	1.07686	-1.13667	-1.07478	-1.08062
1740253	2	91353783	91353832	+									0.999952	0.999889	0.999971	0.999975	-1.00789	-1.09053	-1.02411	-1.12542
70086	2	91400993	91401042	+									0.280612	0.999889	0.999971	0.999975	-2.13901	-1.34945	-1.07153	-1.50715
870538	2	91460512	91460561	+									0.999952	0.999889	0.999971	0.999975	-1.06501	-1.01887	1.03226	-1.05783
5270064	2	91511231	91511280	+									0.760818	0.999889	0.999971	0.999975	-1.15082	1.02203	-1.01288	-1.01417
2810010	2	91512118	91512167	+									0.999952	0.999889	0.999971	0.999975	-1.19584	-1.11036	1.09512	1.0648
1940292	2	91514988	91515037	-									0.999952	0.999889	0.999971	0.999975	1.01612	1.03668	-1.0638	-1.03312
105130026	2	91561067	91561116	+									0.607515	0.999889	0.999971	0.999975	-1.18445	-1.00378	-1.02764	-1.04532
6450102	2	91758533	91758582	+									0.905108	0.999889	0.992623	0.999975	-1.30219	-1.31276	-1.39875	-1.29546
3840020	2	91770011	91770060	-									0.999952	0.999889	0.999971	0.999975	1.02583	1.07166	1.13109	1.09911
6400129	2	91773464	91773513	-									0.999952	0.999889	0.999971	0.999975	1.23529	-1.01486	1.11131	-1.15333
100730398	2	92134866	92134915	+									0.999952	0.999889	0.999971	0.999975	1.00835	-1.06363	1.23368	-1.07026
1660446	2	92224528	92224577	-									0.999952	0.999889	0.999971	0.999975	1.20843	-1.10403	1.01077	-1.28595
6290722	2	92244339	92244388	-									0.999952	0.999889	0.999971	0.999975	1.08808	-1.02815	1.09332	-1.11486
4540154	2	92293068	92293117	-									0.999952	0.999889	0.999971	0.999975	-1.04945	1.02741	1.05324	-1.15132
50601	2	92455211	92455260	+									0.999952	0.999889	0.999971	0.999975	1.17327	-1.08962	-1.08662	1.06277
5910110	2	92796000	92796049	+									0.846351	0.999889	0.999971	0.422111	-1.29641	-1.30197	-1.24046	-1.44814
3710288	2	93033284	93033333	+									0.96019	0.999889	0.999971	0.999975	1.24853	1.02561	1.02609	-1.22559
102650647	2	93041653	93041702	+									0.999952	0.999889	0.999971	0.999975	1.04084	1.11222	-1.24404	-1.05725
4150400	2	93042199	93042248	-									0.999952	0.999889	0.999971	0.999975	-1.00636	-1.0639	1.01852	1.02543
940435	2	93043488	93043537	-									0.999952	0.999889	0.999971	0.999975	-1.10607	-1.11371	-1.18758	1.02645
4780711	2	93259576	93259625	-									0.19946	0.471108	0.999971	0.999975	1.41539	1.46228	1.23488	1.12599
3990487	2	93820858	93820907	-									0.999952	0.999889	0.999971	0.999975	-1.01075	1.07896	1.02266	-1.06712
5290373	2	93873064	93873113	-									0.999952	0.999889	0.999971	0.999975	1.01068	1.16207	-1.05084	-1.18387
2470440	2	94140985	94141034	-									4.4e-07	0.000489424	1.98e-05	6.53e-05	1.9048	1.71837	1.7283	1.67623
103440278	2	96318320	96318369	+									0.999952	0.999889	0.999971	0.999975	1.09427	-1.19833	-1.03843	-1.08733
4810292	2	101540996	101541045	+									0.977797	0.999889	0.999971	0.999975	1.14663	1.09965	1.18125	-1.01604
2100373	2	101741456	101741505	+									0.999952	0.999889	0.999971	0.999975	-1.16409	1.01129	1.0946	-1.11715
103710035	2	102140309	102140358	-									0.999952	0.999889	0.999971	0.999975	-1.08762	1.1129	-1.04972	-1.00357
101770722	2	102289798	102289847	-									0.999952	0.999889	0.999971	0.999975	-1.26901	-1.0812	-1.18204	-1.15391
3390035	2	102290627	102290676	-									0.0274646	0.894053	0.753243	0.654421	-2.53624	-1.95179	-1.76129	-1.70577
4260669	2	102482788	102482837	+									0.999952	0.999889	0.0705444	0.999975	1.00286	-1.02732	1.39869	1.07612
102810286	2	102621830	102621879	+									0.104322	0.0289512	0.999971	0.00320092	1.41391	1.62929	1.16234	1.63505
106400010	2	102629632	102629681	+									0.00183534	0.0189604	0.00405386	0.00374162	6.85034	6.74915	6.23027	6.22009
100580504	2	102630876	102630925	+									0.999952	0.999889	0.999971	0.999975	1.12601	1.24736	1.07054	1.16083
104060358	2	102652950	102652999	-									0.481174	0.999889	0.999971	0.999975	1.24078	-1.04715	1.05557	1.0662
2480440	2	102932694	102932743	+									0.999952	0.999889	0.999971	0.999975	-1.04151	-1.10904	-1.09819	-1.22997
6420079	2	103605986	103606035	-									0.999952	0.999889	0.999971	0.999975	1.0515	-1.14737	1.07194	-1.09807
780551	2	103606693	103606742	-									0.999952	0.999889	0.999971	0.999975	-1.03102	-1.05099	-1.02322	-1.23469
5360450	2	103821843	103821892	+									0.999952	0.999889	0.999971	0.394871	1.10683	1.15087	1.12321	-1.37477
6760673	2	103900350	103900399	+									0.999952	0.999889	0.999971	0.999975	-1.26214	-1.26242	-1.21157	-1.28024
610112	2	103921215	103921255	+	2	103924579	103924587	+					0.999952	0.999889	0.845091	0.999975	1.06755	1.22584	1.26068	-1.03256
4610441	2	103955399	103955448	+									0.0264639	0.246207	0.234084	0.00415093	1.51753	1.46242	1.38109	1.63221
102120333	2	103986317	103986366	-									0.0445814	0.071639	0.00083973	0.519046	2.24721	2.5068	3.09677	1.70679
105220129	2	103987273	103987322	-									0.000314277	0.675455	0.999971	0.999975	2.0345	1.47879	1.30701	1.17195
100730706	2	104266687	104266736	-									0.999952	0.999889	0.999971	0.999975	1.02551	1.04027	1.05247	-1.00993
3850156	2	104449267	104449316	+									0.999952	0.999889	0.999971	0.999975	-1.23972	-1.07206	1.06429	-1.06057
5570458	2	104505474	104505523	+									0.999952	0.999889	0.999971	0.999975	1.04151	-1.22459	-1.00006	-1.1124
5890021	2	104595350	104595399	-									0.222186	0.999889	0.302698	0.999975	1.37173	-1.09973	1.37495	1.06544
100450112	2	104658461	104658510	+									0.999952	0.999889	0.999971	0.594613	1.05658	1.13236	1.18065	1.21341
101660253	2	105515933	105515982	+									0.688331	0.999889	0.999971	0.822264	1.25728	-1.0444	1.11078	-1.25494
4850341	2	109741043	109741092	+									0.999952	0.999889	0.999971	0.999975	1.00434	-1.06824	1.042	1.01393
6900594	2	109884414	109884463	+									0.999952	0.999889	0.999971	0.999975	1.00708	-1.12473	-1.01334	-1.07064
2030538	2	110105559	110105608	-									0.999952	0.999889	0.999971	0.999975	-1.00432	-1.06897	-1.12725	1.03096
2810603	2	112086992	112087041	+									0.999952	0.999889	0.999971	0.999975	-1.08293	-1.03334	-1.03608	-1.08188
6940687	2	112102169	112102218	+									0.999952	0.999889	0.999971	0.999975	-1.15216	-1.0953	-1.15296	-1.10445
101940286	2	112199688	112199737	-									0.999952	0.999889	0.999971	0.779205	-1.03744	-1.04486	-1.10946	-1.21433
610278	2	112202848	112202897	+									0.999952	0.999889	0.999971	0.999975	-1.09396	1.0083	1.01476	-1.03239
5910148	2	112208012	112208061	-									0.999952	0.999889	0.999971	0.999975	-1.01866	1.05959	1.0194	-1.06751
2360239	2	112307458	112307507	+									0.999952	0.999889	0.999971	0.999975	-1.01034	-1.0272	-1.07169	-1.07207
106840435	2	112312002	112312051	+									0.999952	0.999889	0.999971	0.999975	-1.08725	-1.04082	-1.03459	-1.00872
106940068	2	112471280	112471329	+									0.999952	0.999889	0.999971	0.999975	1.02644	-1.01138	-1.10512	-1.04856
1660156	2	112472111	112472160	-									0.999952	0.999889	0.999971	0.999975	-1.03475	-1.13955	1.1178	1.00425
4390328	2	113616801	113616850	-									0.999952	0.999889	0.999971	0.999975	-1.0498	1.00967	-1.05385	-1.07752
2100670	2	113835526	113835575	-									0.999952	0.999889	0.999971	0.999975	1.0046	-1.18303	1.0458	-1.13527
102640600	2	114342469	114342506	-									0.70241	0.999889	0.691914	0.00529422	-1.22488	-1.23814	-1.27618	-1.57492
2690538	2	115604204	115604253	+									0.999952	0.999889	0.999971	0.999975	1.08373	1.04659	1.07361	-1.09503
5130088	2	115688906	115688955	-									0.999952	0.999889	0.999971	0.999975	1.06625	-1.1423	-1.07242	1.03107
103360184	2	115692563	115692612	-									7.69e-06	0.0903016	0.000125657	0.999975	-1.98601	-1.52751	-1.81966	-1.06017
100610193	2	115823630	115823679	-									0.999952	0.999889	0.999971	0.999975	1.04742	-1.11879	-1.05201	1.0584
106620452	2	117007807	117007856	+									0.910979	0.999889	0.999971	0.999975	-1.23504	1.00791	-1.15145	-1.16045
1050148	2	117105869	117105918	-									0.268266	0.999889	0.999971	0.599774	1.51226	1.03064	1.09365	1.41661
6510671	2	117107667	117107716	-									0.999952	0.999889	0.999971	0.999975	-1.31041	-1.50363	1.01317	1.07871
130017	2	118103002	118103051	-									0.999952	0.999889	0.999971	0.999975	-1.13099	-1.25599	1.00282	-1.05926
5390747	2	118301771	118301820	-									0.999952	0.999889	0.999971	0.999975	1.00595	-1.00391	1.02852	-1.02663
101740110	2	118382827	118382855	+									0.999952	0.999889	0.999971	0.999975	1.03028	-1.09249	-1.04835	-1.02188
3940162	2	118383564	118383613	+									0.999952	0.999889	0.999971	0.999975	-1.02679	-1.11754	-1.01882	1.0388
106370619	2	118574344	118574393	+									0.999952	0.999889	0.999971	0.999975	1.0657	1.09217	-1.06889	1.01036
2510673	2	118706837	118706886	+									0.999952	0.999889	0.999971	0.999975	-1.07069	1.16832	1.11116	-1.04865
3840398	2	118844215	118844264	-									0.999952	0.999889	0.999971	0.999975	1.05865	-1.05171	-1.0514	-1.1985
7050672	2	118964093	118964142	-									0.999952	0.999889	0.999971	0.999975	-1.07294	-1.10147	-1.02437	-1.13297
2350750	2	119005117	119005166	-									0.999952	0.999889	0.999971	0.999975	-1.12016	1.01712	1.02056	-1.01588
102360088	2	119075184	119075233	+									0.999952	0.660251	0.999971	0.999975	-1.03111	-1.37809	-1.06889	1.1746
2570609	2	119123932	119123981	+									0.999952	0.999889	0.999971	0.999975	1.01879	-1.05046	1.05447	-1.15093
7100725	2	119179972	119180021	+									0.293579	0.999889	0.999971	0.999975	-1.31094	-1.04318	-1.0832	-1.18446
110014	2	119199062	119199111	-									0.999952	0.999889	0.999971	0.999975	-1.08342	-1.00972	1.07977	-1.0602
100610736	2	119304257	119304306	+									0.999952	0.999889	0.999971	0.999975	1.01093	-1.0001	1.09246	-1.08935
1740706	2	119412685	119412734	+									0.999952	0.999889	0.999971	0.999975	1.07335	-1.21646	-1.01489	-1.12205
103120066	2	119428416	119428465	+									0.999952	0.999889	0.999971	0.999975	1.24621	-1.00007	-1.16522	-1.0443
130113	2	119481253	119481302	-									0.999952	0.999889	0.999971	0.999975	-1.03976	-1.09082	-1.04404	-1.08879
6220075	2	119576736	119576785	+									0.999952	0.999889	0.999971	0.999975	1.0557	1.29485	1.08265	1.20519
5550184	2	119577207	119577256	-									0.999952	0.999889	0.999971	0.874105	1.09671	1.2135	1.17512	1.16623
6450068	2	119589863	119589912	-									0.999952	0.999889	0.999971	0.999975	-1.02096	1.03995	1.04266	-1.08623
3130193	2	119642877	119642926	+									0.976056	0.999889	0.999971	0.999975	1.23106	-1.07789	1.05376	1.03698
103170576	2	119643532	119643581	+									0.999952	0.999889	0.999971	0.999975	1.02687	1.11092	1.05631	1.13698
101690458	2	119786259	119786308	+									0.999952	0.999889	0.999971	0.830147	-1.00004	-1.08875	-1.04077	-1.25184
6900064	2	119790595	119790640	+									0.999952	0.999889	0.999971	0.999975	-1.01223	1.04935	1.15884	-1.04084
106220088	2	119853030	119853079	+									0.999952	0.999889	0.999971	0.999975	-1.08095	1.03437	-1.07036	-1.04594
5890278	2	119915286	119915335	-									0.999952	0.999889	0.999971	0.999975	-1.05238	1.11106	1.00886	-1.07755
103610088	2	119992262	119992311	-									0.999952	0.999889	0.999971	0.999975	1.00563	1.04821	1.09063	1.00446
2230528	2	120181149	120181198	-									0.999952	0.999889	0.999971	0.999975	-1.00041	-1.0753	1.00434	-1.19304
106040056	2	120285618	120285667	+									0.999952	0.999889	0.999971	0.999975	1.0628	-1.02617	-1.00976	1.02519
1980451	2	120329121	120329168	+									0.999952	0.999889	0.999971	0.999975	1.14164	-1.0528	-1.01905	1.01733
2370315	2	120335628	120335677	-									0.999952	0.999889	0.999971	0.999975	-1.07625	1.07925	1.03579	-1.07053
130292	2	120359411	120359460	-									0.999952	0.999889	0.999971	0.999975	-1.00597	-1.05068	1.01226	-1.05695
50037	2	120430072	120430121	-									0.999952	0.999889	0.999971	0.999975	1.00323	-1.06268	-1.00366	-1.04592
106510408	2	120543978	120544027	-									0.999952	0.999889	0.999971	0.999975	1.0128	1.04283	-1.01197	-1.10961
107000390	2	120558833	120558882	-									0.999952	0.999889	0.999971	0.999975	1.01524	1.07483	1.02613	-1.03886
100380592	2	120686659	120686707	-									0.999952	0.999889	0.999971	0.999975	1.02332	1.03883	1.10186	-1.07448
3170441	2	120832967	120833016	+									0.999952	0.999889	0.999971	0.999975	-1.05666	-1.06842	1.05968	-1.12809
104920053	2	120834210	120834259	+									0.999952	0.999889	0.999971	0.999975	1.14006	1.01228	-1.03491	-1.05648
6040446	2	120842190	120842239	+									0.999952	0.999889	0.999971	0.999975	1.03142	1.10302	-1.02191	-1.01921
102120538	2	120971144	120971193	+									0.999952	0.999889	0.999971	0.999975	1.00138	-1.08596	-1.06589	-1.04501
105910400	2	120981961	120982010	+									0.999952	0.999889	0.999971	0.999975	-1.08959	-1.19976	-1.06039	-1.12506
100670288	2	121012386	121012435	+									0.999952	0.999889	0.999971	0.791646	1.11988	1.07891	-1.03618	-1.24996
450333	2	121024187	121024236	-									0.999952	0.999889	0.999971	0.999975	-1.0679	-1.00124	1.02591	-1.13211
630082	2	121025365	121025414	-									0.999952	0.999889	0.999971	0.999975	1.02768	-1.18514	-1.06585	-1.25529
4920576	2	121126155	121126204	+									0.0497479	0.999889	0.999971	0.999975	-3.23821	-1.65863	-1.07499	-1.01099
3440270	2	121136339	121136388	-									0.999952	0.999889	0.999971	0.999975	-1.07908	-1.0252	1.02431	-1.12711
103440707	2	121186021	121186069	+									0.999952	0.999889	0.999971	0.999975	1.07289	-1.0474	1.05774	-1.07114
1230746	2	121189400	121189449	+									0.999952	0.999889	0.999971	0.999975	-1.06581	1.01678	1.05375	1.01393
2940403	2	121220141	121220190	-									0.760818	0.999889	0.999971	0.999975	-1.13051	1.06157	-1.02433	-1.08752
2120270	2	121261678	121261727	+									0.999952	0.999889	0.999971	0.999975	-1.20314	-1.051	1.01153	-1.33991
5720010	2	121276724	121276773	+									0.808624	0.999889	0.999971	0.999975	-1.24354	1.06514	1.00318	-1.04155
6760725	2	121283942	121283991	+									0.999952	0.999889	0.999971	0.999975	-1.12106	1.00809	-1.01841	-1.14637
1240575	2	121374156	121374205	-									0.999952	0.999889	0.999971	0.999975	-1.04994	-1.02281	1.02073	1.05458
105550301	2	121725706	121725755	+									0.999952	0.999889	0.999971	0.999975	-1.00992	-1.1522	-1.0414	-1.12644
1400435	2	121761260	121761309	+									0.999952	0.999889	0.999971	0.999975	1.03509	-1.07932	-1.05005	-1.06833
106370725	2	121837639	121837688	+									0.999952	0.999889	0.999971	0.999975	-1.13267	-1.03082	-1.03467	1.02998
106020040	2	121854605	121854647	+	2	121866892	121866898	+					0.190719	0.999889	0.999971	0.999975	-1.51642	-1.06679	-1.05166	-1.10053
5080332	2	121976811	121976860	+									0.999952	0.999889	0.999971	0.999975	-1.23408	-1.08178	-1.10751	-1.22428
3710435	2	122090650	122090699	+									0.999952	0.999889	0.999971	0.999975	-1.05742	-1.03183	1.09931	-1.06349
6650445	2	122175004	122175053	-									0.999952	0.999889	0.999971	0.999975	-1.10625	-1.01484	1.01846	-1.00565
5690546	2	122573562	122573611	+									0.999952	0.999889	0.999971	0.96502	-1.01857	-1.20981	-1.02289	-1.26273
103060632	2	124132847	124132896	+									0.999952	0.999889	0.999971	0.999975	-1.10419	1.08303	1.05066	1.10045
102630100	2	124444413	124444462	+									0.999952	0.999889	0.999971	0.999975	1.06731	1.05622	1.15138	1.01859
4050324	2	124492489	124492538	+									0.999952	0.999889	0.999971	0.999975	1.07707	-1.01534	1.12251	1.0803
103800075	2	124973150	124973199	+									0.999952	0.999889	0.999971	0.999975	1.16268	1.22194	1.33268	1.17032
5690403	2	125084023	125084072	+									6.32e-08	6.97e-05	2.01e-06	4.28e-06	-2.78291	-2.42845	-2.44332	-2.3716
3840358	2	125388871	125388920	-									0.999952	0.999889	0.999971	0.999975	-1.02004	-1.03505	-1.02317	-1.03955
6620132	2	125500003	125500052	+									0.999952	0.999889	0.999971	0.999975	-1.00571	-1.05105	-1.00666	-1.00176
3060142	2	125657362	125657411	-									0.999952	0.999889	0.999971	0.832443	-1.08094	1.0444	1.01881	-1.21326
6650450	2	125990724	125990773	+									0.999952	0.999889	0.999971	0.999975	-1.02707	-1.01039	1.09323	1.01172
2320537	2	126412092	126412118	+	2	126413496	126413518	+					0.999952	0.999889	0.999971	0.999975	-1.14758	-1.01494	1.0546	-1.15437
104480458	2	126413659	126413708	+									0.882874	0.999889	0.999971	0.999975	-1.2044	-1.08701	-1.03047	-1.13553
4150463	2	126419925	126419974	-									0.999952	0.999889	0.999971	0.999975	1.01616	1.07674	-1.00159	1.08087
104060093	2	126495968	126496017	-									0.999952	0.999889	0.999971	0.999975	1.05942	-1.02546	1.01867	-1.12447
6100672	2	126584298	126584347	+									0.999952	0.999889	0.999971	0.999975	-1.1339	-1.01501	-1.01182	-1.12038
6040541	2	126730681	126730730	-									0.999952	0.999889	0.999971	0.999975	1.0891	-1.19032	-1.00491	-1.08543
104920132	2	126892895	126892944	+									0.942509	0.999889	0.999971	0.999975	1.19444	-1.12026	1.0485	1.01815
360088	2	126922734	126922783	+									0.999952	0.999889	0.999971	0.910996	-1.06733	-1.0459	-1.1519	-1.17667
6620494	2	127065951	127066000	+									0.999952	0.999889	0.999971	0.999975	-1.02616	-1.03269	-1.10712	-1.01383
5390097	2	127066994	127067043	-									0.999952	0.999889	0.999971	0.999975	-1.02318	-1.0715	-1.01355	-1.11984
1510093	2	127086335	127086384	+									0.999952	0.999889	0.999971	0.999975	-1.16035	-1.03015	-1.04071	-1.13513
270139	2	127124017	127124066	+									0.999952	0.999889	0.999971	0.999975	-1.06383	-1.04827	-1.00728	-1.08158
2940546	2	127262300	127262349	-									0.999952	0.999889	0.999971	0.999975	-1.18251	1.11341	1.05416	-1.06021
6620373	2	127266202	127266251	-									0.999952	0.999889	0.999971	0.999975	-1.03564	1.01674	1.08183	-1.08633
6290050	2	127282402	127282451	-									0.999952	0.999889	0.999971	0.999975	-1.10672	1.07525	1.09825	-1.1262
5290044	2	127401342	127401391	-									0.999952	0.999889	0.999971	0.999975	1.06456	-1.00174	-1.06778	1.14769
2450673	2	127423941	127423990	+									0.999952	0.999889	0.999971	0.999975	1.01331	-1.16742	-1.17491	-1.12336
6130181	2	127429624	127429673	+									0.999952	0.999889	0.999971	0.999975	-1.01157	-1.08995	-1.05071	-1.06248
101050019	2	127432287	127432336	+									0.999952	0.999889	0.999971	0.999975	1.01288	-1.01118	-1.06568	-1.15429
4590239	2	127459096	127459145	-									0.999952	0.999889	0.999971	0.999975	-1.09351	-1.01205	1.08402	1.18405
4280487	2	127465977	127466026	-									0.372986	0.999889	0.999971	0.999975	-1.61196	1.13238	-1.00775	1.33919
4480332	2	127571638	127571687	-									0.999952	0.999889	0.999971	0.999975	-1.10489	-1.10176	1.05825	-1.01266
1850025	2	127617955	127618004	-									0.999952	0.999889	0.999971	0.999975	-1.09001	-1.02986	1.0203	1.00293
6350162	2	128438596	128438645	-									0.910859	0.999889	0.999971	0.999975	1.19756	-1.0124	1.03295	-1.02061
6420056	2	128627827	128627876	+									0.999952	0.999889	0.999971	0.999975	-1.05787	-1.10298	-1.13675	-1.02169
101770184	2	128678131	128678180	+									0.999952	0.999889	0.999971	0.999975	1.01107	-1.02627	-1.06791	-1.07481
130711	2	128844234	128844283	+									0.999952	0.999889	0.999971	0.999975	-1.00606	-1.13084	-1.15359	-1.21298
100670278	2	128865536	128865585	+									0.999952	0.999889	0.999971	0.999975	1.06639	-1.09193	-1.0225	-1.10831
105290593	2	128921906	128921955	+									0.999952	0.999889	0.999971	0.999975	-1.12616	-1.01538	-1.1521	-1.15266
510315	2	128951868	128951917	+									0.244415	0.999889	0.999971	0.901439	1.33471	1.16535	1.16085	1.21452
3830575	2	128959566	128959615	+									0.712408	0.999889	0.999971	0.977125	-1.23342	-1.04952	-1.0849	-1.20611
105340348	2	129030728	129030777	+									0.806831	0.999889	0.999971	0.999975	1.19234	1.00427	-1.10724	-1.06901
6420014	2	129036850	129036899	+									0.999952	0.999889	0.999971	0.999975	1.0342	-1.12207	1.10187	1.02517
102900722	2	129422905	129422954	+									0.65541	0.999889	0.862666	0.999975	1.30518	1.06542	1.33583	1.08637
130465	2	129457829	129457878	+									0.999952	0.999889	0.999971	0.999975	-1.03402	1.0493	1.09236	-1.05364
5720408	2	129512986	129513035	-									0.999952	0.999889	0.999971	0.999975	1.12425	-1.343	1.03291	-1.11648
3520671	2	129997616	129997665	-									0.999952	0.999889	0.999971	0.999975	-1.11232	1.13228	1.11238	-1.13828
1230097	2	129998380	129998429	-									0.999952	0.999889	0.999971	0.999975	-1.04191	1.13365	1.16617	-1.04694
5570139	2	130102507	130102556	+									0.999952	0.999889	0.999971	0.999975	-1.19163	-1.14409	1.00913	-1.09107
5690070	2	130105169	130105218	-									0.999952	0.999889	0.999971	0.999975	-1.04803	-1.04851	-1.05681	-1.19056
103060672	2	130107976	130108025	-									0.999952	0.999889	0.999971	0.999975	-1.17702	-1.00201	-1.09922	-1.07342
3060253	2	130195644	130195693	+									0.999952	0.999889	0.999971	0.999975	-1.03237	-1.02533	1.01307	1.05256
5390725	2	130216982	130217031	-									0.579486	0.999889	0.999971	0.257733	-1.27387	-1.10729	-1.22835	-1.36792
2760154	2	130244782	130244831	-									0.999952	0.999889	0.999971	0.999975	1.03267	-1.00823	1.0932	1.0672
6860301	2	130268116	130268165	+									0.999952	0.999889	0.999971	0.999975	1.03776	-1.04336	1.08478	-1.07322
3390041	2	130269055	130269104	+									0.999952	0.999889	0.999971	0.999975	-1.05235	1.00759	-1.03539	-1.1317
7100110	2	130379330	130379379	+									0.999952	0.999889	0.999971	0.999975	1.12648	-1.00483	-1.01165	-1.02167
4120113	2	130389511	130389560	+									0.999952	0.999889	0.999971	0.999975	-1.03534	-1.09859	-1.09642	-1.27607
3850692	2	130401970	130402019	+									0.999952	0.999889	0.999971	0.999975	1.08593	1.0885	1.02832	-1.02019
2100113	2	130406501	130406550	-									0.0359963	0.999889	0.999971	0.999975	-1.93396	-1.01527	1.0264	1.24932
6380044	2	130415945	130415994	-									0.999952	0.999889	0.999971	0.999975	1.01375	1.03547	1.03355	-1.00408
4060647	2	130417088	130417137	-									0.999952	0.999889	0.999971	0.999975	1.05962	1.09729	1.0213	-1.06798
1500162	2	130439669	130439718	-									0.999952	0.999889	0.999971	0.573432	-1.08974	1.01944	1.03743	-1.27391
4670440	2	130458745	130458794	-									0.999952	0.999889	0.999971	0.999975	-1.1814	-1.01546	-1.05752	-1.2764
103990575	2	130479828	130479877	-									0.999952	0.999889	0.999971	0.999975	-1.07954	1.08697	-1.00586	-1.04273
100840292	2	130487515	130487564	-									0.999952	0.999889	0.999971	0.999975	-1.07537	-1.084	-1.054	-1.0768
101050369	2	130487813	130487836	-	2	130487549	130487574	-					0.999952	0.999889	0.999971	0.999975	-1.06691	-1.0505	-1.02686	1.01255
102970524	2	130532231	130532280	-									0.999952	0.999889	0.999971	0.999975	-1.12502	1.00618	-1.00437	-1.14966
1190164	2	130533891	130533940	-									0.999952	0.999889	0.999971	0.999975	-1.14147	-1.09637	-1.04124	-1.12307
106200026	2	130609442	130609491	-									0.999952	0.999889	0.999971	0.999975	-1.03434	-1.06005	1.03517	-1.22316
4590746	2	130866765	130866814	-									0.999952	0.999889	0.999971	0.999975	1.15216	-1.16102	-1.02677	1.09312
50594	2	130971643	130971692	+									0.999952	0.999889	0.999971	0.999975	-1.0225	1.02587	-1.13584	-1.04863
2100672	2	130972091	130972140	-									0.999952	0.999889	0.999971	0.999975	-1.10112	1.04575	1.02348	-1.17619
101410204	2	130996795	130996844	-									0.999952	0.999889	0.999971	0.999975	1.09583	1.04231	-1.12529	-1.05966
2940154	2	131003044	131003093	-									0.999952	0.999889	0.999971	0.999975	1.08029	1.02822	1.03562	-1.0525
5360358	2	131039091	131039140	+									0.999952	0.999889	0.999971	0.999975	-1.05606	1.06241	-1.0684	-1.05382
2850541	2	131073338	131073387	+									0.999952	0.999889	0.999971	0.999975	-1.08628	-1.08341	-1.09892	1.00271
130446	2	131122030	131122079	+									0.999952	0.999889	0.999971	0.999975	1.02005	1.13258	-1.01621	1.02798
50019	2	131350642	131350691	+									0.999952	0.999889	0.999971	0.999975	-1.14278	1.14	1.06658	1.09891
3140687	2	131763976	131764025	+									0.999952	0.999889	0.999971	0.999975	1.06798	1.03166	1.04036	1.09831
5720546	2	131818972	131819021	-									0.999952	0.999889	0.999971	0.746054	-1.09382	-1.0819	-1.01564	1.25829
6660722	2	131878502	131878551	-									0.999952	0.999889	0.999971	0.999975	1.09247	-1.11003	1.11616	1.1461
4570181	2	132065446	132065495	-									0.999952	0.999889	0.999971	0.999975	-1.08646	1.00174	1.00209	-1.13493
940754	2	132075170	132075219	-									0.999952	0.999889	0.999971	0.999975	1.03422	1.0043	-1.00929	1.01047
101050348	2	132121730	132121779	+									0.999952	0.999889	0.999971	0.999975	-1.008	1.10396	1.21481	1.0809
104780500	2	132355024	132355073	-									0.999952	0.999889	0.999971	0.999975	-1.00433	1.06705	1.01693	-1.12009
5720338	2	132355513	132355562	-									0.999952	0.999889	0.999971	0.999975	1.00891	1.01768	-1.00786	-1.13914
1980053	2	132619745	132619794	+									0.999952	0.999889	0.999971	0.999975	-1.202	1.08766	-1.15916	-1.13966
510112	2	132629990	132630039	-									0.999952	0.999889	0.999971	0.999975	1.04491	-1.07306	1.17596	1.0732
105720050	2	132692206	132692255	+									0.999952	0.999889	0.999971	0.999975	1.00576	-1.0356	-1.07556	-1.03527
106220736	2	134420351	134420400	-									0.999952	0.999889	0.999971	0.999975	1.00457	1.06496	-1.02805	1.06387
2570050	2	135298028	135298077	+									0.999952	0.999889	0.999971	0.999975	-1.06115	1.04281	1.05544	1.01946
3610398	2	135895411	135895460	+									0.999952	0.999889	0.999971	0.999975	-1.06045	1.07851	-1.0039	1.12314
103190138	2	136607883	136607932	+									0.999952	0.999889	0.999971	0.999975	1.01553	1.05394	1.0118	-1.00932
2760722	2	136716811	136716860	-									0.999952	0.999889	0.999971	0.999975	-1.21047	1.03435	1.05937	-1.14366
2510577	2	138104450	138104499	+									0.999952	0.999889	0.999971	0.999975	-1.16336	1.08828	1.12952	1.11326
3190053	2	138104564	138104613	+									0.57517	0.999889	0.999971	0.999975	-1.78663	-1.32456	-1.0322	1.10485
4200746	2	138110422	138110471	+									0.999952	0.999889	0.999971	0.999975	-1.06153	1.08796	-1.23512	-1.03196
1980041	2	138110475	138110524	+									0.688331	0.999889	0.999971	0.999975	-1.58655	-1.2682	-1.22633	-1.47354
3800348	2	139584184	139584233	+									0.999952	0.999889	0.999971	0.999975	-1.09572	1.1532	-1.00832	-1.15596
520403	2	139659581	139659630	-									0.999952	0.999889	0.999971	0.999975	1.04373	1.00085	-1.00347	1.00304
105130309	2	139802481	139802530	-									0.999952	0.999889	0.999971	0.999975	-1.00285	1.04736	-1.04738	1.03951
450309	2	140028621	140028670	+									0.999952	0.999889	0.999971	0.999975	-1.16662	1.02429	-1.06556	-1.12024
2030048	2	140029296	140029345	+									0.999952	0.999889	0.999971	0.999975	1.0927	-1.03453	-1.09834	-1.17983
2760497	2	140485087	140485136	-									0.999952	0.999889	0.999971	0.999975	1.04672	-1.13163	-1.1424	-1.26831
6040519	2	140489101	140489150	-									0.999952	0.999889	0.999971	0.999975	-1.05838	-1.37253	-1.13392	-1.08777
103990047	2	140661142	140661191	+									0.999952	0.999889	0.999971	0.999975	1.21092	1.07735	-1.01852	-1.01727
1430139	2	142218051	142218100	+									0.999952	0.999889	0.999971	0.999975	1.0782	1.1922	1.26548	1.05664
100780025	2	143402344	143402393	+									0.528949	0.999889	0.999971	0.999975	1.42362	1.09248	-1.04815	-1.24771
5900619	2	143639340	143639389	+									0.999952	0.999889	0.999971	0.999975	1.20929	1.08993	1.14768	1.00609
360017	2	143639408	143639457	+									0.999952	0.999889	0.999971	0.999975	1.22207	1.18495	1.07564	-1.10891
430528	2	143641826	143641875	+									0.879737	0.999889	0.999971	0.999975	1.32818	1.07355	1.08411	-1.00297
5050440	2	143773329	143773378	-									0.999952	0.999889	0.999971	0.999975	-1.17433	-1.00504	1.06518	-1.08892
4570717	2	144194797	144194846	+									0.145335	0.999889	0.999971	0.999975	-1.49022	-1.02759	-1.00922	-1.14913
5550333	2	144233275	144233324	+									0.999952	0.999889	0.999971	0.999975	-1.03405	1.12296	1.02807	-1.08194
105910110	2	144296379	144296428	-									0.999952	0.999889	0.999971	0.999975	-1.12232	-1.05521	-1.01625	-1.10324
103990735	2	144368157	144368206	-									0.999952	0.999889	0.999971	0.999975	1.04096	-1.0909	-1.17501	-1.03922
3840497	2	144412116	144412165	+									0.999952	0.999889	0.999971	0.999975	1.05197	-1.18599	-1.02027	-1.03531
106620138	2	144420927	144420976	+									0.999952	0.999889	0.999971	0.999975	-1.18978	1.08133	-1.13666	-1.06452
2640471	2	144594052	144594101	+									0.999952	0.999889	0.999971	0.999975	-1.09893	1.00984	1.03868	-1.15394
5080707	2	145467575	145467624	+									0.999952	0.999889	0.999971	0.999975	-1.11836	1.0584	-1.01591	-1.03463
2450184	2	145712787	145712836	+									0.999952	0.999889	0.999971	0.999975	1.03943	-1.08166	-1.03243	-1.11711
5050097	2	145743400	145743449	-									0.999952	0.999889	0.999971	0.999975	-1.05627	1.00508	-1.01221	-1.04898
106420056	2	146795322	146795323	+	2	146795693	146795740	+					0.999952	0.999889	0.999971	0.999975	1.0676	1.09813	1.14802	-1.05924
4150731	2	147009118	147009167	-									0.259268	0.999889	0.999971	0.999975	-1.31047	-1.08328	-1.16805	-1.18387
6770180	2	148262654	148262703	-									0.999952	0.999889	0.999971	0.512524	-1.0044	-1.19294	-1.1125	-1.24723
106450576	2	148263573	148263622	-									0.999952	0.999889	0.999971	0.12966	1.00437	-1.05525	-1.21438	-1.4388
6420446	2	148517935	148517984	+									0.999952	0.999889	0.999971	0.999975	1.04427	-1.0199	1.05879	-1.07974
100110524	2	148520596	148520645	-									0.999952	0.999889	0.999971	0.999975	1.01566	-1.03469	1.05046	-1.01417
105910592	2	148520827	148520871	-									0.999952	0.999889	0.999971	0.999975	1.04226	1.09077	1.0813	-1.06358
7050452	2	148698591	148698640	-									0.999952	0.999889	0.999971	0.999975	1.20916	1.03826	1.33988	1.17122
2120735	2	150409246	150409295	-									0.999952	0.999889	0.999971	0.999975	1.03437	1.06864	1.25006	-1.10482
6580037	2	150443914	150443963	-									0.999952	0.999889	0.999971	0.822264	-1.12101	-1.12221	1.01476	-1.20351
104050088	2	150596767	150596816	+									0.999952	0.999889	0.999971	0.999975	-1.05559	-1.095	-1.09386	-1.10465
2510731	2	150657139	150657188	+									8.36e-08	0.000331925	2.18e-07	5.83e-07	-3.73526	-2.8979	-3.57101	-3.37635
1450168	2	150658671	150658720	-									0.999952	0.999889	0.999971	0.999975	-1.21862	-1.04688	-1.04925	-1.07515
102480292	2	150663362	150663411	-									0.0289962	0.999889	0.701934	0.0622978	-1.51413	-1.21008	-1.29465	-1.46199
4760286	2	150760491	150760540	-									0.022019	0.0118568	0.0384975	0.000398083	-1.57832	-1.77481	-1.54467	-1.85485
4050670	2	151335330	151335379	+									0.999952	0.999889	0.999971	0.999975	-1.14469	-1.06866	1.0003	-1.17012
2450368	2	151386408	151386457	+									0.999952	0.999889	0.999971	0.999975	-1.09082	1.03917	1.01878	1.06617
2680484	2	151416409	151416458	-									0.999952	0.999889	0.999971	0.999975	-1.00686	1.04667	-1.02238	-1.1017
5340056	2	151544050	151544099	-									0.999952	0.999889	0.999971	0.999975	1.00199	1.07176	1.04167	-1.02454
6350082	2	151795435	151795484	-									0.885068	0.999889	0.999971	0.999975	-1.20393	-1.01176	-1.05015	-1.11779
3130195	2	151935522	151935571	+									0.999952	0.999889	0.999971	0.999975	-1.12827	-1.1903	-1.1604	-1.06959
630731	2	151936733	151936782	+									0.988125	0.999889	0.999971	0.999975	-1.3164	-1.06449	1.00101	-1.02783
101050181	2	152076249	152076298	+									0.999952	0.999889	0.999971	0.999975	-1.15426	-1.27613	1.02318	-1.19468
7000286	2	152138194	152138243	+									0.999952	0.999889	0.999971	0.999975	-1.00756	-1.0809	1.00585	-1.23663
105290139	2	152139678	152139727	+									0.999952	0.999889	0.999971	0.999975	-1.00805	-1.024	1.15915	-1.04374
2340746	2	152144871	152144920	-									0.999952	0.999889	0.999971	0.999975	1.02001	-1.04982	1.00898	-1.01935
102450193	2	152194789	152194838	-									0.0573228	0.999889	0.999971	0.999975	-1.43792	-1.05377	1.06735	-1.06529
102900040	2	152220725	152220774	-									0.999952	0.999889	0.999971	0.999975	1.00973	1.04974	-1.05723	-1.25451
580438	2	152238755	152238804	-									0.999952	0.999889	0.999971	0.999975	-1.10301	-1.08184	1.07718	-1.08164
100450541	2	152509022	152509071	+									0.999952	0.999889	0.999971	0.999975	-1.00802	-1.02671	-1.04819	-1.128
60463	2	152514629	152514678	+									0.999952	0.999889	0.999971	0.999975	-1.04783	-1.2781	-1.09477	-1.26715
940711	2	152517548	152517597	+									0.999952	0.999889	0.999971	0.999975	-1.1141	-1.23754	-1.03346	-1.23022
104780717	2	152529749	152529798	+									0.999952	0.999889	0.999971	0.999975	-1.15803	-1.02449	-1.06101	-1.09351
4850609	2	152532356	152532405	+									0.999952	0.999889	0.999971	0.846215	1.02682	-1.01363	1.05275	-1.2726
360398	2	152562859	152562908	+									0.999952	0.999889	0.999971	0.999975	-1.10204	1.04035	-1.11276	-1.12408
1580452	2	152607465	152607514	-									0.999952	0.999889	0.999971	0.999975	-1.04121	-1.24527	-1.03633	-1.03624
6650021	2	152677970	152678019	+									0.999952	0.999889	0.999971	0.999975	1.07629	-1.0958	1.02349	1.11485
1850044	2	152771166	152771215	-									0.999952	0.999889	0.999971	0.999975	-1.05712	1.1675	1.11287	1.03424
5340592	2	152834936	152834985	-									0.999952	0.999889	0.999971	0.999975	-1.05449	1.03271	1.00951	-1.12312
450538	2	153035723	153035772	+									0.999952	0.999889	0.999971	0.999975	-1.07481	-1.0384	1.05723	-1.2056
4210112	2	153035887	153035936	+									0.999952	0.999889	0.999971	0.999975	-1.17372	-1.07896	1.02131	-1.15338
106100563	2	153048225	153048274	-									0.999952	0.999889	0.999971	0.999975	-1.08403	1.03181	-1.03119	-1.11215
1770148	2	153053756	153053805	-									0.938649	0.999889	0.999971	0.999975	-1.16874	1.07866	1.01583	-1.10672
1570458	2	153092784	153092833	+									0.0356641	0.999889	0.999971	0.920464	-1.28286	1.00229	-1.02668	-1.13053
100870215	2	153158811	153158860	+									0.999952	0.999889	0.999971	0.999975	-1.06716	1.01688	-1.06697	-1.02623
106290100	2	153228442	153228491	+									0.999952	0.999889	0.999971	0.999975	1.04637	1.05811	1.03467	1.05009
100630497	2	153234472	153234521	-									0.999952	0.999889	0.999971	0.999975	1.12786	1.11339	1.00824	-1.08604
5700072	2	153444612	153444661	-									0.999952	0.999889	0.999971	0.999975	-1.043	1.13949	1.11007	-1.13797
4070059	2	153513313	153513362	+									0.722336	0.999889	0.999971	0.999975	1.14046	-1.05467	-1.08789	-1.03125
3290037	2	153594130	153594179	+									0.999952	0.999889	0.999971	0.734947	-1.18013	-1.11139	-1.28202	-1.28498
5960161	2	154161264	154161313	-									0.999952	0.999889	0.999971	0.999975	-1.04237	-1.09538	-1.0908	-1.13068
4010465	2	154168107	154168156	-									0.999952	0.999889	0.999971	0.999975	-1.12898	-1.0066	-1.05124	-1.03296
4570400	2	154202191	154202240	-									0.272891	0.0699528	0.00596871	0.0274101	1.4282	1.73106	1.7934	1.65752
101400619	2	154227812	154227861	-									0.999952	0.999889	0.999971	0.999975	1.08549	1.04315	1.09572	-1.04599
5360093	2	154385392	154385441	-									0.789931	0.999889	0.999971	0.999975	1.20789	-1.02985	1.24049	-1.04369
520066	2	154472261	154472310	+									2.17e-06	0.0015869	2.5e-07	0.00178732	2.22827	1.9499	2.40152	1.74996
106020102	2	154509072	154509121	+									1.89e-15	0.0228	8.17e-13	5.9e-15	-3.2267	-1.52407	-2.70939	-3.08159
3060338	2	154516988	154517037	+									0.999952	0.999889	0.999971	0.996317	-1.10405	-1.12363	1.10941	-1.32208
840044	2	154519835	154519884	+									0.49735	0.999889	0.999971	0.0239085	-1.71547	-1.32467	-1.26934	-2.49397
1740066	2	154692774	154692823	+									0.949215	0.999889	0.999971	0.999975	-1.30728	1.02213	-1.12166	-1.11849
102340736	2	154696446	154696495	+									0.104688	0.999889	0.999971	0.612137	-1.33414	-1.01992	-1.08341	-1.22298
770095	2	154697327	154697376	-									0.999952	0.999889	0.999971	0.999975	-1.17539	-1.30232	-1.21933	-1.20842
2810487	2	154697996	154698045	-									0.212765	0.999889	0.999971	0.999975	1.42075	1.27111	1.27558	1.01867
106130025	2	154885087	154885136	-									1.26e-07	0.000106848	1.14e-06	3.16e-09	2.11918	1.92555	1.99061	2.33257
5700022	2	154963951	154964000	+									0.999952	0.999889	0.999971	0.877036	-1.0307	-1.04029	1.06634	-1.32846
1410731	2	155051743	155051792	+									0.999952	0.999889	0.999971	0.999975	1.05238	1.04849	1.12064	1.2426
6760358	2	155075682	155075731	+									0.999952	0.999889	0.999971	0.999975	1.17494	1.28128	1.31238	1.18303
5570605	2	155102204	155102253	+									0.016256	0.114879	0.000316159	0.115699	1.53686	1.51493	1.77729	1.40755
840519	2	155103325	155103374	+									0.999952	0.999889	0.999971	0.999975	1.07539	-1.05227	1.10051	-1.00612
6290273	2	155124793	155124842	-									0.304319	0.999889	0.782197	0.999975	1.42783	1.147	1.36501	1.24769
2690435	2	155215184	155215233	+									0.999952	0.999889	0.999971	0.999975	-1.06978	-1.02969	-1.17856	-1.02588
1780333	2	155231299	155231348	-									0.999952	0.999889	0.999971	0.999975	1.14044	1.07702	1.18634	1.04193
1770288	2	155316484	155316533	-									0.999952	0.999889	0.999971	0.999975	-1.07464	1.23428	1.02702	-1.24238
1780435	2	155388240	155388289	+									0.999952	0.999889	0.999971	0.999975	1.05082	1.27256	1.08811	-1.03872
6900398	2	155389264	155389313	-									0.999952	0.999889	0.306286	0.999975	-1.0128	-1.06096	-1.36192	-1.12032
1660402	2	155460180	155460229	-									0.999952	0.999889	0.999971	0.999975	-1.20054	1.06538	1.06635	-1.04765
840520	2	155463406	155463455	-									0.999952	0.999889	0.999971	0.999975	1.08001	-1.02861	1.04697	-1.27438
7040494	2	155527821	155527870	-									0.304049	0.999889	0.131821	0.124593	-1.33117	-1.20752	-1.42095	-1.41007
102370059	2	155643558	155643607	-									0.999952	0.999889	0.999971	0.999975	-1.0245	1.03629	-1.05591	1.05857
106450368	2	155643993	155644042	+									0.999952	0.999889	0.999971	0.999975	1.11557	1.16268	1.03438	1.02806
1400541	2	155645665	155645714	-									0.853068	0.999889	0.999971	0.999975	-1.26103	-1.10036	-1.10577	-1.15687
106400451	2	155705678	155705727	-									0.0205815	0.999889	0.999971	0.999975	1.42266	1.109	1.19242	-1.01582
1400075	2	155834108	155834157	+									0.999952	0.999889	0.999971	0.999975	-1.03505	-1.12986	1.05878	-1.23555
4780047	2	155843383	155843432	+									0.319309	0.999889	0.999971	0.999975	-1.55968	1.02558	-1.01012	-1.16879
107040575	2	155895120	155895169	+									0.999952	0.999889	0.00837345	0.0351402	1.0936	1.11075	1.41467	1.35032
4570239	2	155920732	155920781	-									0.999952	0.999889	0.999971	0.999975	1.05264	1.03563	1.0124	-1.07704
6660129	2	155920741	155920790	-									0.999952	0.999889	0.999971	0.999975	-1.0602	1.03777	1.00605	-1.08073
2680563	2	155951019	155951068	-									0.999952	0.999889	0.999971	0.999975	-1.12247	1.01637	-1.02089	-1.07628
2350092	2	155970249	155970298	+									0.999952	0.999889	0.999971	0.999975	-1.00517	1.139	1.11474	1.04523
6450280	2	155973372	155973414	-									0.999952	0.999889	0.999971	0.999975	1.12033	-1.06653	1.06144	1.05563
4230458	2	156005732	156005781	-									0.999952	0.999889	0.999971	0.999975	-1.06376	-1.00022	1.0654	-1.13486
103120435	2	156113571	156113620	+									0.999952	0.999889	0.999971	0.999975	-1.21563	-1.06397	-1.17113	-1.32401
100520487	2	156113581	156113630	+									0.999952	0.999889	0.999971	0.887285	-1.24559	-1.08496	-1.18935	-1.35738
6900270	2	156135572	156135621	+									0.999952	0.999889	0.999971	0.999975	1.01077	-1.05983	-1.01494	-1.10847
6220592	2	156137833	156137882	-									0.999952	0.999889	0.999971	0.999975	-1.28431	-1.03638	-1.02772	-1.03981
102510398	2	156368600	156368649	+									0.999952	0.999889	0.999971	0.999975	-1.2096	-1.02447	-1.15075	-1.01388
5690161	2	156588509	156588558	+									0.999952	0.999889	0.999971	0.805678	-1.07419	-1.13832	-1.06254	-1.26899
105700670	2	156588618	156588667	+									0.999952	0.999889	0.999971	0.923665	-1.10258	-1.01931	-1.10895	-1.26685
7050138	2	156606235	156606284	+									0.999952	0.999889	0.999971	0.819723	-1.04914	-1.24872	-1.23612	-1.25689
4210750	2	156606805	156606854	+									0.999952	0.999889	0.999971	0.999975	-1.02965	-1.16372	-1.10868	-1.0771
102680201	2	156682627	156682676	-									0.000157258	0.42905	0.000100987	6.03e-05	-1.48652	-1.25664	-1.50281	-1.52354
100520072	2	156688430	156688479	-									0.00384106	0.0474525	0.999971	1.8e-09	-1.79489	-1.75083	-1.0357	-3.13599
1050546	2	156698968	156699017	+									0.999952	0.999889	0.999971	0.999975	1.16508	1.07278	1.05435	1.012
2320725	2	156753330	156753379	-									0.999952	0.999889	0.999971	0.999975	-1.20728	-1.06062	-1.16786	-1.25505
100540278	2	156836379	156836428	-									0.999952	0.999889	0.999971	0.805678	-1.14251	1.25352	1.18259	1.28061
1090575	2	156841833	156841882	-									0.000393077	0.236543	0.065857	7.12e-07	-1.68678	-1.4165	-1.41718	-2.03311
105690739	2	156862811	156862860	-									0.999952	0.999889	0.999971	0.9047	-1.08591	-1.19207	-1.14451	-1.17263
102570451	2	157000799	157000848	-									0.999952	0.999889	0.999971	0.999975	-1.11958	1.11251	-1.01008	1.03885
4570575	2	157155245	157155294	-									5.44e-08	0.999889	0.999971	4.54e-26	-2.36542	-1.16871	1.02869	-9.80405
2120390	2	157222399	157222448	+									1.66e-11	8.11e-09	3.29e-10	9.19e-09	4.66724	4.4163	4.10315	3.54566
101990091	2	157297502	157297551	+									0.999952	0.999889	0.999971	0.999975	1.06839	-1.01986	1.0586	1.00909
3990253	2	157382437	157382486	-									0.999952	0.999889	0.999971	0.999975	-1.15089	-1.02074	1.06793	-1.1049
103990551	2	157386277	157386326	+									0.999952	0.999889	0.238208	0.999975	1.18198	1.31003	1.41472	-1.09937
4920053	2	157386974	157387023	+									0.96019	0.999889	0.346602	0.999975	1.38298	1.07881	1.76576	-1.17241
5130253	2	157387933	157387982	+									0.988236	0.999889	0.999971	0.999975	-1.19919	-1.03441	1.21872	-1.02786
5900750	2	157709936	157709985	+									0.00131139	0.139498	0.0154691	0.0122249	-1.9993	-1.71022	-1.77835	-1.79423
6220671	2	157770386	157770435	+									0.999952	0.999889	0.950861	0.999975	1.06896	1.07568	1.27557	-1.10182
4280037	2	157807746	157807795	-									0.999952	0.999889	0.999971	0.999975	-1.03937	1.14712	1.10282	1.15438
2060689	2	157902742	157902791	+									0.999952	0.999889	0.999971	0.999975	1.01319	-1.02107	-1.02227	-1.01506
5360452	2	157942265	157942314	-									0.463454	0.999889	0.999971	0.999975	-1.31731	-1.01535	-1.23201	-1.04597
6860019	2	158157723	158157772	+									0.999952	0.999889	0.351717	0.999975	1.01527	1.08159	1.50831	1.10391
1090228	2	158181578	158181627	-									0.881842	0.999889	0.999971	0.999975	-1.13769	-1.04037	1.00968	-1.03499
4010332	2	158206790	158206839	+									0.419845	0.999889	0.999971	0.854497	1.52402	-1.05725	1.32155	-1.40025
104730114	2	158211590	158211639	+									0.439051	0.999889	0.999971	0.286061	-1.73338	-1.42844	-1.50605	-1.88664
103840138	2	158324605	158324654	+									0.999952	0.999889	0.999971	0.999975	-1.08535	1.03719	-1.08057	-1.04629
6200278	2	158441306	158441355	+									0.999952	0.999889	0.999971	0.999975	-1.11013	-1.09828	-1.02139	-1.09914
105130047	2	158454706	158454755	+									0.999952	0.999889	0.999971	0.999975	1.07745	1.01105	-1.10226	-1.07803
105420685	2	158591714	158591763	+									0.999952	0.999889	0.999971	0.999975	1.07747	1.04396	-1.21128	1.32572
6650324	2	160546758	160546807	+									0.999952	0.999889	0.999971	0.999975	1.10796	-1.18076	-1.09841	-1.0165
105130592	2	160595148	160595197	+									0.999952	0.999889	0.999971	0.999975	1.02779	1.0152	-1.0262	-1.06888
460615	2	160596228	160596277	-									0.999952	0.999889	0.999971	0.999975	-1.01506	1.02264	-1.00294	-1.06834
102480138	2	160773037	160773086	-									0.999952	0.999889	0.999971	0.999975	-1.14683	1.05812	1.03976	-1.07087
6620433	2	161353376	161353425	-									0.747275	0.999889	0.999971	0.999975	-1.41503	-1.05887	1.21669	-1.12346
106100411	2	162759140	162759189	+									0.999952	0.999889	0.999971	0.999975	1.14608	1.05942	-1.11378	1.07827
60224	2	162762662	162762711	+									0.999952	0.999889	0.999971	0.999975	-1.04852	-1.04095	1.02054	-1.09541
2030575	2	162871202	162871251	+									0.999952	0.999889	0.999971	0.999975	1.00099	1.00408	-1.06792	-1.07925
100610519	2	163245767	163245816	+									0.999952	0.999889	0.999971	0.999975	-1.12005	1.05221	1.01251	-1.14384
1660066	2	163276323	163276372	+									0.999952	0.999889	0.999971	0.999975	-1.08005	-1.12359	1.04309	-1.09957
100460315	2	163292156	163292205	-									0.999952	0.999889	0.999971	0.999975	-1.06353	1.08196	-1.00664	-1.02345
2470064	2	163442128	163442177	+									0.758457	0.999889	0.999971	0.999975	1.1488	1.00541	-1.11882	-1.00171
102370132	2	163444449	163444498	+									0.999952	0.999889	0.999971	0.999975	1.01298	1.21352	-1.23576	-1.06633
5260255	2	163551747	163551796	+									0.999952	0.999889	0.999971	0.999975	1.0511	-1.00328	-1.08953	-1.07153
106770072	2	163685880	163685929	-									0.999952	0.999889	0.999971	0.999975	-1.10293	-1.08725	-1.02577	-1.14341
1740176	2	163843764	163843813	+									0.999952	0.999889	0.999971	0.999975	-1.04222	-1.08977	1.00742	-1.14904
5690102	2	163879998	163880047	-									0.999952	0.999889	0.999971	0.999975	-1.09818	-1.20779	-1.06096	-1.25846
2640152	2	163980796	163980845	+									0.158597	0.999889	0.999971	0.999975	-1.2577	-1.2016	-1.08942	-1.12976
5270671	2	164215183	164215232	-									0.999952	0.999889	0.999971	0.999975	-1.12739	-1.07293	1.14103	-1.00849
6370411	2	164250124	164250173	-									0.999952	0.999889	0.999971	0.785803	-1.12603	-1.16958	-1.19259	-1.33686
2570121	2	164316166	164316215	+									0.999952	0.999889	0.999971	0.375856	1.06039	1.19196	1.04089	1.29158
105720372	2	164333659	164333708	+									0.999952	0.999889	0.999971	0.999975	1.05077	1.14996	-1.00265	-1.2622
5360537	2	164593633	164593682	+									0.999952	0.999889	0.999971	0.999975	-1.07154	1.01407	-1.00826	-1.00499
130333	2	164612939	164612988	+									0.999952	0.999889	0.999971	0.999975	1.0583	-1.04782	1.10525	-1.13366
2940039	2	164620519	164620568	-									0.999952	0.999889	0.999971	0.999975	-1.13723	-1.07205	-1.00875	-1.09337
1230563	2	164647435	164647484	+									0.643124	0.999889	0.999971	0.999975	-1.18773	1.14194	1.07458	-1.13395
7050239	2	164652290	164652339	+									0.999952	0.999889	0.999971	0.999975	-1.06704	1.04942	1.03746	-1.04186
630110	2	164665235	164665284	-									0.999952	0.999889	0.999971	0.999975	-1.15863	-1.01671	-1.12578	-1.05639
106100647	2	164703905	164703954	-									0.999952	0.999889	0.999971	0.999975	1.04747	-1.14991	-1.145	-1.10829
450152	2	164716740	164716789	+									0.933396	0.999889	0.999971	0.999975	-1.17974	1.11505	1.01055	-1.00229
3520181	2	164717912	164717961	-									0.999952	0.999889	0.999971	0.999975	-1.07767	1.0183	1.02706	-1.0539
1980692	2	164825147	164825196	+									0.999952	0.999889	0.999971	0.999975	-1.02726	1.02895	-1.14013	1.07215
2060647	2	164825905	164825954	-									0.999952	0.999889	0.999971	0.999975	-1.03868	1.03261	-1.00936	-1.05244
4200484	2	164937284	164937333	-									0.999952	0.999889	0.999971	0.821084	-1.00882	1.09756	-1.14283	-1.28216
770707	2	165102277	165102326	-									0.999952	0.999889	0.999971	0.999975	-1.23036	-1.01485	1.02821	1.01416
4540685	2	165113638	165113687	-									0.688331	0.999889	0.999971	0.999975	1.23169	1.07019	-1.18858	1.08498
2120168	2	165202954	165203003	-									0.999952	0.999889	0.999971	0.999975	-1.10452	-1.07954	-1.00235	-1.15055
102690497	2	165609859	165609908	-									0.999952	0.999889	0.999971	0.999975	-1.06827	-1.10039	-1.08397	-1.16437
730162	2	165611030	165611079	-									0.999952	0.999889	0.999971	0.999975	-1.17978	-1.1699	-1.07127	-1.11744
3850010	2	165611072	165611121	-									0.999952	0.999889	0.999971	0.999975	-1.08884	-1.11303	-1.01894	-1.14462
5130605	2	165652849	165652898	-									0.999952	0.999889	0.999971	0.999975	-1.13127	-1.04493	-1.0268	-1.11712
460086	2	165899720	165899769	-									0.999952	0.999889	0.999971	0.999975	-1.12777	1.04304	1.09903	-1.00962
6520288	2	166392717	166392766	-									0.332572	0.999889	0.999971	0.822264	-1.3776	-1.226	-1.2409	-1.28044
4010152	2	166621939	166621988	+									0.999952	0.999889	0.999971	0.999975	-1.06633	1.11315	1.08159	-1.01917
5550500	2	166720178	166720227	+									0.999952	0.999889	0.999971	0.999975	-1.10996	-1.0765	-1.14532	-1.14638
102970139	2	166723303	166723352	+									0.999952	0.999889	0.999971	0.999975	-1.00956	-1.01595	-1.03719	-1.02093
3850086	2	166770025	166770074	+									0.999952	0.999889	0.999971	0.999975	1.02605	-1.01485	1.00493	-1.10052
2320494	2	166773938	166773987	-									0.999952	0.999889	0.999971	0.999975	-1.1408	-1.04286	1.02406	-1.11355
107040026	2	166857080	166857129	+									0.984643	0.999889	0.999971	0.999975	-1.28869	-1.04147	-1.04159	1.09444
6840333	2	166861519	166861568	-									0.999952	0.999889	0.999971	0.999975	1.00004	1.1277	1.09457	1.02518
104850204	2	166891272	166891321	+									0.999952	0.999889	0.999971	0.999975	1.04346	1.02656	1.09143	1.16403
3610035	2	166929155	166929204	-									0.999952	0.999889	0.999971	0.999975	1.01005	-1.02933	1.04348	-1.02243
104540279	2	167017605	167017654	+									0.0553926	0.0983022	0.115892	0.0195557	1.40692	1.46502	1.37361	1.46462
6620411	2	167028847	167028896	-									0.498146	0.999889	0.999971	9.79e-05	1.25028	1.19452	-1.02497	1.75468
100730040	2	167106953	167107002	-									0.943403	0.999889	0.999971	0.999975	-1.1707	1.03247	-1.03255	-1.00962
4480138	2	167302180	167302229	+									0.999952	0.999889	0.999971	0.999975	-1.08186	1.05256	1.1538	-1.04906
4210278	2	167341564	167341613	+									0.999952	0.999889	0.999971	0.999975	1.06661	-1.08417	1.06569	1.00617
2470093	2	167434321	167434370	-									0.999952	0.999889	0.999971	0.999975	-1.05163	-1.16114	-1.20199	-1.11238
105910180	2	167469026	167469075	-									0.999952	0.999889	0.999971	0.999975	-1.03544	1.13825	-1.03802	1.11647
2970019	2	167515586	167515635	+									0.999952	0.999889	0.999971	0.999975	1.0499	1.16688	1.11298	1.00695
2650056	2	167802311	167802360	+									0.977797	0.999889	0.999971	0.999975	1.15338	-1.08828	1.0021	-1.00904
104070408	2	167804276	167804325	+									0.999952	0.999889	0.999971	0.999975	1.04034	1.02833	-1.09162	-1.00309
100610497	2	168006609	168006658	-									0.999952	0.999889	0.999971	0.999975	-1.03512	1.23459	1.05025	-1.05969
101170372	2	168007817	168007866	-									0.999952	0.999889	0.999971	0.999975	1.184	-1.10406	1.01954	-1.15998
1240050	2	168034689	168034738	-									0.999952	0.999889	0.999971	0.999975	-1.11935	1.03481	-1.04145	-1.0371
4810019	2	168043199	168043248	-									0.999952	0.999889	0.999971	0.999975	-1.05103	-1.02892	1.15394	1.00788
106450039	2	168057475	168057524	+									0.822935	0.999889	0.999971	0.999975	-1.13859	1.07616	1.02446	1.02353
101400280	2	168344797	168344846	-									0.999952	0.999889	0.784834	0.00594207	-1.0674	1.06355	1.21494	1.45135
5390280	2	168460278	168460327	-									0.999952	0.999889	0.999971	0.999975	-1.07331	-1.04524	1.09571	-1.11791
4780673	2	168475059	168475108	-									0.999952	0.999889	0.999971	0.999975	1.07533	-1.0691	1.00708	-1.10436
1090270	2	168751086	168751135	-									0.999952	0.999889	0.999971	0.999975	1.0258	-1.02559	-1.03765	-1.13422
103850093	2	169598585	169598634	+									0.999952	0.999889	0.999971	0.999975	1.1641	1.08795	-1.13973	-1.00911
106980193	2	169712021	169712070	+									0.999952	0.999889	0.92234	0.999975	1.01026	1.03558	-1.29265	-1.02761
100840397	2	169738488	169738537	+									0.999952	0.999889	0.406553	0.999975	1.02381	1.07916	-1.37937	-1.14792
102230438	2	169897053	169897102	+									0.999952	0.999889	0.999971	0.999975	-1.13492	-1.02762	-1.30832	-1.12499
2030711	2	170172727	170172776	-									0.999952	0.999889	0.999971	0.358909	-1.04181	1.27551	1.25278	1.54197
4010286	2	170342086	170342136	+									0.999952	0.999889	0.999971	0.999975	-1.00447	-1.19352	-1.01133	-1.0931
770113	2	170557638	170557684	+									0.999952	0.120808	0.0323885	0.0237345	-1.34807	-2.50192	-2.45831	-2.50983
3450156	2	170704712	170704761	+									0.752399	0.999889	0.999971	0.415524	1.29669	1.19023	1.3227	1.41222
4010451	2	171862065	171862114	-									0.999952	0.999889	0.999971	0.999975	-1.09678	-1.209	-1.1274	1.01826
3290538	2	172076486	172076535	+									0.999952	0.999889	0.999971	0.999975	-1.08919	1.01005	-1.15703	1.1075
1990133	2	172181063	172181112	+									0.999952	0.999889	0.999971	0.999975	-1.14682	-1.09999	-1.06108	1.05263
4610129	2	172206508	172206557	+									0.999952	0.999889	0.999971	0.999975	1.00148	1.00548	-1.07231	-1.08371
6590538	2	172277408	172277457	+									0.999952	0.999889	0.999971	0.829746	1.05083	-1.03561	1.15179	-1.16487
130609	2	172294243	172294292	+									0.999952	0.999889	0.999971	0.999975	-1.08205	1.12225	-1.0168	1.02884
2570594	2	172295170	172295219	+									0.999952	0.999889	0.999971	0.999975	-1.12568	-1.07887	-1.00087	-1.09071
7050121	2	172840873	172840922	+									0.999952	0.999889	0.999971	0.999975	-1.08409	1.04784	1.00983	-1.13434
105910082	2	173050228	173050277	-									0.999952	0.999889	0.999971	0.999975	1.03212	1.20303	1.0572	1.04041
3830707	2	173529904	173529953	+									0.999952	0.999889	0.999971	0.971925	1.01096	1.0364	-1.02248	-1.18494
101580440	2	173532458	173532507	+									0.999952	0.999889	0.999971	0.999975	-1.05454	1.05658	-1.03575	-1.05366
1660451	2	173601668	173601717	+									0.999952	0.999889	0.999971	0.999975	1.03683	-1.0089	1.07015	-1.04957
6130333	2	173604548	173604597	+									0.999952	0.999889	0.999971	0.791608	-1.09956	1.02394	1.04682	-1.45813
105670136	2	173609586	173609635	+									0.999952	0.999889	0.999971	0.999975	-1.10906	1.07853	1.03948	1.00842
103870315	2	173947835	173947884	+									0.85582	0.999889	0.999971	0.999975	-1.1836	-1.05728	-1.00606	-1.04105
101240152	2	174154232	174154281	+									0.24324	0.999889	0.999971	0.999975	-1.90053	-1.22831	-1.0518	1.08847
4050152	2	174155806	174155855	+									0.999952	0.999889	0.999971	0.999975	1.05932	-1.11207	-1.02718	-1.00754
106380014	2	174159370	174159419	+									0.999952	0.999889	0.999971	0.253054	-1.09332	-1.18267	-1.04856	-1.52912
630441	2	174159718	174159767	+									0.999952	0.999889	0.999971	0.999975	-1.00637	-1.25983	-1.07678	-1.26542
102030091	2	174161628	174161677	+									0.0928392	0.999889	0.999971	0.539891	-1.7654	-1.22213	1.09414	-1.50632
1190632	2	174252704	174252753	+									0.999952	0.999889	0.999971	0.999975	-1.19733	-1.02965	1.04262	1.12554
1500687	2	174253204	174253253	-									0.251873	0.999889	0.999971	0.519046	-1.39111	-1.24384	-1.06317	-1.33375
1690364	2	174253387	174253436	-									0.698468	0.999889	0.999971	0.999975	-1.27016	-1.19873	-1.0766	-1.13879
4120411	2	174288016	174288065	-									0.999952	0.999889	0.999971	0.999975	1.03474	1.0477	1.01074	1.06592
730600	2	174290620	174290669	-									0.999952	0.999889	0.999971	0.999975	-1.08843	-1.04257	-1.04926	-1.08502
106200133	2	178146189	178146238	-									0.999952	0.999889	0.999971	0.999975	-1.13591	1.10597	1.04125	-1.05243
100730279	2	178148238	178148287	-									0.999952	0.999889	0.999971	0.999975	-1.02943	1.02278	1.0954	1.023
106660278	2	178158780	178158829	+									0.999952	0.999889	0.999971	0.999975	-1.0523	1.09482	1.06456	-1.00573
106760180	2	179633943	179633992	+									0.999952	0.999889	0.999971	0.999975	1.00756	1.14532	-1.2165	-1.22404
100520097	2	179770020	179770069	+									0.999952	0.999889	0.999971	0.999975	1.02978	1.03027	-1.17406	-1.06128
2230131	2	179773437	179773486	-									0.999952	0.999889	0.999971	0.999975	-1.03502	1.01105	1.00833	-1.03442
6550068	2	179804619	179804668	+									0.999952	0.999889	0.999971	0.999975	-1.05755	1.05167	1.04997	-1.18562
3060609	2	179820491	179820540	+									0.999952	0.999889	0.999971	0.938558	-1.04055	1.03605	-1.0157	-1.17252
6180040	2	179834728	179834777	-									0.999952	0.999889	0.999971	0.999975	-1.12475	-1.1798	1.2853	1.02082
5690215	2	179897069	179897118	+									0.999952	0.999889	0.999971	0.999975	-1.17095	-1.03069	1.01584	-1.15569
670333	2	179910571	179910620	+									0.999952	0.999889	0.999971	0.999975	-1.21805	-1.03735	-1.00034	-1.02937
3120673	2	179992701	179992750	+									0.999952	0.999889	0.999971	0.999975	-1.02806	1.02326	1.06938	1.10567
104200403	2	179993772	179993821	-									0.999952	0.999889	0.999971	0.999975	-1.01803	1.12844	-1.02188	-1.08823
6510136	2	180279550	180279599	+									0.188252	0.999889	0.999971	0.999975	-1.31309	-1.07831	1.17801	-1.01307
5700397	2	180330457	180330506	+									0.999952	0.999889	0.999971	0.999975	-1.03402	1.06997	1.03515	-1.11142
1500601	2	180403238	180403287	-									0.999952	0.999889	0.999971	0.999975	1.02498	-1.11854	1.05727	-1.11423
380184	2	180452876	180452925	+									0.999952	0.999889	0.999971	0.999975	-1.1407	-1.02045	-1.01265	-1.03682
102650121	2	180455365	180455414	+									0.999952	0.999889	0.999971	0.999975	1.06056	1.05791	-1.0577	-1.19015
4070739	2	180639502	180639551	-									0.999952	0.999889	0.999971	0.999975	1.2519	1.34575	1.25688	1.15624
2650435	2	180669569	180669618	-									0.999952	0.999889	0.999971	0.999975	-1.0552	-1.03867	1.04982	-1.08356
102570092	2	180703113	180703162	+									0.999952	0.999889	0.999971	0.999975	-1.05507	-1.00546	-1.13826	-1.1091
4780364	2	180716995	180717044	+									0.999952	0.999889	0.999971	0.999975	-1.21125	-1.02779	-1.1062	-1.21288
103830110	2	180721911	180721960	+									0.999952	0.999889	0.701879	0.999975	-1.02186	-1.1164	-1.23309	-1.03831
2970136	2	180752174	180752223	+									0.00304597	0.999889	0.999971	0.856411	1.4756	-1.08046	1.17268	1.17684
2680091	2	180757028	180757077	-									0.999952	0.999889	0.999971	0.999975	-1.07413	1.06275	1.00028	1.0228
105670300	2	180810583	180810632	-									0.999952	0.999889	0.999971	0.999975	1.09398	1.14217	1.11836	1.00481
105340309	2	180819556	180819605	-									0.999952	0.999889	0.999971	0.999975	-1.13404	1.04917	1.01412	-1.12122
106040500	2	180843477	180843526	-									0.878691	0.999889	0.999971	0.999975	1.25612	1.05605	1.01216	-1.13874
2260162	2	180882407	180882456	-									0.999952	0.999889	0.999971	0.999975	-1.05418	1.0267	1.09212	1.06252
5290086	2	180888469	180888518	-									0.999952	0.999889	0.999971	0.999975	1.17749	-1.22571	-1.1249	-1.04913
102810575	2	180922135	180922159	+	2	180922370	180922394	+					0.795706	0.999889	0.999971	0.999975	1.37045	1.46956	1.29694	1.26445
5420519	2	180922315	180922364	+									0.999952	0.999889	0.999971	0.999975	-1.10382	-1.08874	-1.08846	-1.0172
6520170	2	180986572	180986621	-									0.999952	0.999889	0.999971	0.999975	-1.09435	-1.03399	1.01371	-1.12798
2690692	2	181041947	181041996	-									0.999952	0.999889	0.999971	0.999975	-1.12882	1.04517	1.05304	1.01563
106180528	2	181044363	181044412	-									0.999952	0.999889	0.999971	0.999975	1.06957	-1.01037	1.09281	-1.11977
101580338	2	181046868	181046917	-									0.999952	0.999889	0.999971	0.999975	-1.03953	-1.11633	1.0924	-1.02602
6770546	2	181090860	181090909	+									0.999952	0.999889	0.999971	0.999975	-1.01905	1.00271	1.10002	-1.09275
4560112	2	181091086	181091135	+									0.999952	0.999889	0.999971	0.810349	-1.02481	-1.11104	-1.08478	-1.21398
380441	2	181091171	181091220	+									0.999952	0.999889	0.999971	0.999975	1.08475	-1.0395	1.0465	-1.06446
1450102	2	181095723	181095772	-									0.999952	0.999889	0.999971	0.999975	-1.09196	1.00223	-1.04687	-1.07877
3850403	2	181117806	181117855	+									0.999952	0.999889	0.999971	0.999975	-1.17353	-1.13219	-1.07007	-1.20591
103870278	2	181121996	181122045	+									0.999952	0.999889	0.999971	0.999975	1.02851	1.03139	1.01202	1.04016
104560341	2	181122611	181122660	-									0.999952	0.999889	0.999971	0.999975	1.12846	1.09976	1.11607	-1.14942
106940373	2	181236732	181236758	+	2	181237581	181237583	+					0.999952	0.999889	0.999971	0.999975	1.05859	1.07873	1.08548	1.09773
6590040	2	181251359	181251408	+									0.999952	0.999889	0.999971	0.999975	-1.03585	-1.08772	-1.04067	-1.11229
2630193	2	181286628	181286677	+									0.999952	0.999889	0.999971	0.999975	1.43301	-1.00667	1.6224	1.0665
103800301	2	181287224	181287273	+									0.999952	0.999889	0.999971	0.810266	1.30607	1.53824	1.54465	1.54518
105900180	2	181316912	181316961	-									0.999952	0.999889	0.999971	0.999975	1.01029	1.07109	-1.02479	-1.06204
1580497	2	181330169	181330218	-									0.285553	0.999889	0.999971	0.999975	-1.29075	1.0171	-1.10483	-1.08117
6350332	2	181390285	181390334	+									0.999952	0.999889	0.999971	0.999975	-1.00127	-1.00121	-1.01439	-1.1032
2320086	2	181404795	181404844	-									0.999952	0.999889	0.999971	0.999975	1.04419	1.02534	1.0073	-1.21045
6370546	2	181422608	181422657	+									0.999952	0.999889	0.999971	0.999975	-1.01962	1.12123	1.05513	1.00159
540066	2	181454699	181454748	+									0.999952	0.999889	0.999971	0.999975	1.04523	1.01921	1.11447	-1.05895
6770524	2	181562348	181562397	+									0.999952	0.999889	0.992623	0.40484	1.13614	1.19984	1.25468	1.3142
1400253	2	181591462	181591511	+									0.999952	0.999889	0.999971	0.999975	1.05582	-1.05044	1.00942	1.02239
5290500	2	181604496	181604545	+									0.999952	0.999889	0.999971	0.999975	1.04212	1.01709	-1.0031	-1.08395
102360315	3	5415284	5415333	+									0.806831	0.999889	0.999971	0.999975	-1.22109	-1.08308	1.01344	-1.07051
6650671	3	5560726	5560775	-									0.999952	0.999889	0.999971	0.999975	-1.08531	1.10326	1.07972	-1.05624
4070441	3	7445021	7445070	+									0.999952	0.999889	0.999971	0.999975	-1.15106	-1.03542	-1.03422	-1.09267
3120121	3	7553480	7553529	+									0.999952	0.999889	0.999971	0.999975	1.02704	1.08944	1.07115	-1.059
6220181	3	8561306	8561355	+									0.999952	0.999889	0.999971	0.999975	-1.2903	1.03368	1.12382	1.02811
4570546	3	8663624	8663673	-									0.999952	0.999889	0.999971	0.999975	1.05053	1.10281	1.05362	1.11052
2230373	3	8802302	8802351	-									0.999952	0.999889	0.999971	0.999975	-1.12655	1.12175	-1.05578	-1.07866
6550008	3	9427326	9427375	-									0.00043158	0.00628511	1.42e-05	0.000130819	4.37427	4.27833	5.9198	4.90909
4120452	3	9445968	9446017	-									0.93647	0.999889	0.999971	0.0220507	-1.22193	-1.0942	-1.03784	-1.61918
102480139	3	10015129	10015143	+	3	10015472	10015503	+					0.999952	0.999889	0.999971	0.999975	1.04314	-1.01619	-1.09031	1.01767
870446	3	10418817	10418866	-									0.754907	0.999889	0.999971	0.999975	-1.34945	-1.05863	-1.02341	-1.16096
4210471	3	14181876	14181925	+									0.843942	0.999889	0.999971	0.999975	-1.16365	1.10259	-1.07544	-1.0457
102680082	3	14568062	14568111	+									0.393185	0.999889	0.999971	0.999975	-1.28483	-1.02272	-1.20776	-1.08729
104200064	3	14606309	14606358	-									0.999952	0.999889	0.999971	0.999975	-1.1327	-1.09078	-1.09751	-1.09952
1660600	3	14895036	14895085	+									0.999952	0.999889	0.999971	0.894355	-1.25881	1.03011	1.36137	1.52755
7040609	3	16116614	16116663	+									0.999952	0.999889	0.999971	0.999975	1.24712	-1.15977	1.06241	1.00731
100520019	3	17697605	17697654	+									0.688331	0.999889	0.999971	0.999975	1.27641	-1.17867	1.15092	-1.07001
6510520	3	17957205	17957254	+									0.999952	0.999889	0.999971	0.999975	1.14236	-1.02675	-1.10951	-1.26951
1190309	3	17972488	17972537	-									0.999952	0.999889	0.999971	0.999975	-1.11612	1.07543	-1.05312	-1.0872
6650348	3	19896597	19896646	-									0.999952	0.999889	0.999971	0.999975	1.00566	1.12216	1.0536	-1.08263
104540484	3	20017927	20017976	+									0.999952	0.999889	0.999971	0.999975	-1.03115	-1.02379	-1.01829	-1.13194
102120021	3	21974618	21974667	-									0.999952	0.999889	0.999971	0.999975	1.01573	1.05924	-1.17934	1.01602
100380162	3	22015952	22016001	+									0.833913	0.999889	0.999971	0.999975	-1.1831	1.14992	-1.06946	-1.084
106520403	3	22115298	22115347	+									0.999952	0.999889	0.999971	0.999975	1.05283	1.00051	-1.17934	-1.21641
5670278	3	25330924	25330973	-									0.999952	0.999889	0.999971	0.999975	1.11803	-1.08413	1.02602	-1.03817
1050687	3	27315410	27315459	-									0.999952	0.999889	0.999971	0.999975	1.06171	-1.12836	1.02221	-1.0128
104150433	3	28569142	28569191	+									0.999952	0.999889	0.999971	0.999975	-1.17705	1.04282	-1.03069	-1.10017
105080465	3	28571193	28571242	+									0.999952	0.999889	0.999971	0.999975	1.06839	1.00465	-1.00871	1.06117
100430148	3	28574128	28574177	+									0.999952	0.999889	0.999971	0.999975	-1.00864	-1.06794	1.06207	1.0575
5720112	3	28705692	28705741	+									0.999952	0.999889	0.999971	0.999975	-1.06231	-1.01482	-1.13925	-1.04009
102900600	3	29110764	29110813	+									0.999952	0.999889	0.999971	0.999975	-1.15625	1.0047	1.20078	-1.18964
6860497	3	29589856	29589905	+									0.698468	0.999889	0.999971	0.999975	1.20027	1.16407	1.18065	-1.0391
1980022	3	30516988	30517037	+									0.999952	0.999889	0.999971	0.999975	-1.09625	-1.00298	-1.02546	-1.12122
101980504	3	30799116	30799165	-									0.999952	0.999889	0.999971	0.999975	1.05745	-1.05444	-1.02847	1.02097
106770411	3	31021133	31021182	+									0.999952	0.999889	0.999971	0.999975	1.02881	-1.06966	1.01961	-1.0984
670338	3	31063160	31063209	+									0.999952	0.999889	0.999971	0.190795	-1.21294	1.40939	1.22765	1.66029
1010273	3	31105424	31105473	-									0.574401	0.999889	0.999971	0.999975	-1.62251	-1.33983	1.09211	-1.00552
2260035	3	31107932	31107981	-									0.688331	0.999889	0.999971	0.999975	-1.57997	-1.21681	1.14468	1.05713
450170	3	32234129	32234178	-									0.999952	0.999889	0.999971	0.999975	-1.06013	1.00926	1.11936	-1.11659
3800053	3	32419567	32419616	+									0.999952	0.999889	0.999971	0.999975	1.00507	1.05847	1.12331	-1.03975
5080546	3	32476502	32476551	+									0.999952	0.999889	0.999971	0.999975	-1.00571	1.03829	1.04818	-1.04115
3390079	3	32482597	32482646	-									0.999952	0.999889	0.999971	0.950734	1.07178	-1.00824	1.07964	-1.20281
4230035	3	32483992	32484041	-									0.999952	0.999889	0.999971	0.999975	1.10457	-1.09355	1.044	-1.13637
6290541	3	32608677	32608726	+									0.999952	0.999889	0.999971	0.999975	1.08607	-1.21545	-1.04213	-1.04039
5220543	3	32625799	32625848	+									0.999952	0.999889	0.999971	0.999975	1.08549	-1.01144	1.01215	1.04676
3800097	3	32629012	32629061	-									0.999952	0.999889	0.999971	0.999975	-1.13464	-1.11276	-1.17217	-1.24955
110685	3	32650086	32650135	+									0.999952	0.999889	0.999971	0.999975	-1.14845	-1.10728	1.01322	-1.13972
101170195	3	32923659	32923708	-									0.999952	0.999889	0.999971	0.999975	-1.09208	-1.07841	1.09415	-1.0248
105420112	3	33039151	33039200	-									0.999952	0.999889	0.999971	0.999975	1.05489	-1.07003	1.14888	-1.27061
104070717	3	33699545	33699594	+									0.999952	0.999889	0.999971	0.999975	-1.04435	-1.0062	-1.00283	-1.10508
6200114	3	33706632	33706681	+									0.999952	0.999889	0.999971	0.999975	-1.06192	-1.11975	-1.07528	-1.09813
100540161	3	33708314	33708363	+									0.999952	0.999889	0.999971	0.999975	-1.13713	-1.05622	-1.08159	-1.05732
101990161	3	33708343	33708392	+									0.999952	0.999889	0.999971	0.999975	-1.01881	1.00855	-1.02623	-1.02264
106550131	3	33709355	33709404	+									0.999952	0.999889	0.999971	0.999975	1.08526	1.05262	-1.06196	1.07604
106220273	3	33711000	33711049	+									0.999952	0.999889	0.999971	0.999975	-1.01197	1.06439	-1.06583	-1.03792
100430242	3	33719268	33719317	-									0.999952	0.999889	0.999971	0.999975	-1.00955	1.14609	-1.00319	1.0188
2230491	3	34549976	34550025	+									0.949735	0.999889	0.999971	0.999975	-1.20389	-1.23121	1.08126	-1.11099
105290110	3	35736930	35736979	+									0.415602	0.999889	0.999971	0.999975	1.63714	1.33091	1.40527	-1.33972
4230100	3	35754909	35754958	+									0.999952	0.999889	0.999971	0.999975	1.05604	-1.08994	1.17239	1.0018
3060403	3	35988274	35988323	+									0.999952	0.999889	0.999971	0.999975	-1.10786	-1.10987	-1.03415	-1.07563
4070333	3	35990618	35990667	+									0.999952	0.999889	0.999971	0.999975	1.07673	-1.05542	1.00799	-1.16969
103990050	3	36064717	36064766	+									0.999952	0.999889	0.999971	0.999975	1.11792	1.06226	1.00518	-1.04284
1050373	3	36348108	36348157	-									0.999952	0.999889	0.999971	0.999975	1.01099	1.32298	-1.01509	1.1192
4540593	3	36472267	36472316	-									0.301248	0.999889	0.999971	0.532555	-1.3567	-1.22562	-1.22828	-1.31678
100510026	3	37207981	37208030	-									0.762354	0.999889	0.999971	0.999975	-1.20819	1.09221	-1.17022	-1.04894
100770603	3	38348758	38348807	-									0.999952	0.999889	0.999971	0.999975	-1.07522	1.00741	-1.11863	-1.02903
870543	3	38351219	38351268	-									0.999952	0.999889	0.999971	0.999975	-1.08823	-1.03896	1.03349	1.07436
1190390	3	40622470	40622519	-									0.665539	0.999889	0.966687	0.999975	1.23721	1.28146	1.2516	1.12046
102230504	3	40631448	40631497	-									0.178789	0.999889	0.999971	0.999975	1.3527	1.05195	1.07272	-1.11346
106450685	3	40690036	40690085	-									0.999952	0.999889	0.999971	0.584594	1.12267	-1.09562	1.1487	-1.36678
6370739	3	40714451	40714500	+									0.33949	0.507793	0.0201308	0.999975	1.26387	1.32941	1.43746	1.10649
3140450	3	40741870	40741919	+									0.999952	0.999889	0.999971	0.40484	1.01707	-1.13551	-1.10079	-1.27762
102350338	3	40870363	40870412	-									0.999952	0.999889	0.999971	0.999975	-1.09844	-1.00819	-1.03557	-1.12979
103520673	3	40870898	40870947	-									0.999952	0.999889	0.999971	0.999975	1.00754	1.01726	-1.06419	-1.04425
1340433	3	41420496	41420545	+									0.999952	0.999889	0.916147	0.999975	1.04196	1.12153	1.31093	-1.09212
102680128	3	45085941	45085990	-									0.999952	0.999889	0.999971	0.999975	1.09258	1.10487	1.01684	1.01802
1190592	3	45185737	45185786	+									0.999952	0.999889	0.999971	0.999975	1.12686	-1.01222	1.0482	-1.08608
3190204	3	45186208	45186257	+									0.566763	0.999889	0.999971	0.999975	1.31091	-1.07026	1.14007	1.003
940014	3	45186794	45186843	+									0.207862	0.999889	0.318163	0.999975	1.28543	1.15417	1.28071	-1.05134
106980411	3	45223535	45223584	+									0.999952	0.999889	0.999971	0.999975	1.07076	1.02617	1.02922	1.01208
104150273	3	50169399	50169448	-									0.000184662	0.00677682	8.33e-05	0.000720592	1.9078	1.82447	1.96861	1.81942
50438	3	51055149	51055198	+									2.39e-09	1.42e-06	1.76e-09	1.03e-08	-5.12112	-4.51228	-5.15761	-4.66681
5130372	3	51055420	51055469	+									0.999952	0.999889	0.999971	0.999975	1.02082	-1.0324	-1.08351	-1.08158
2570377	3	51212786	51212823	-	3	51212159	51212170	-					0.999952	0.999889	0.999971	0.999975	-1.23181	-1.01768	-1.01384	-1.01135
102470091	3	51279673	51279722	+									0.999952	0.999889	0.999971	0.999975	1.01211	1.14187	1.02032	-1.00345
106760451	3	51299461	51299510	+									0.999952	0.999889	0.999971	0.999975	-1.12969	1.10013	1.01026	-1.05665
3850685	3	51299777	51299826	+									0.999952	0.999889	0.999971	0.999975	1.17007	-1.18191	1.14008	-1.15598
105550735	3	51319363	51319412	-									0.999952	0.999889	0.999971	0.999975	-1.03908	-1.0834	-1.1543	-1.11478
3120670	3	52153116	52153165	+									0.999952	0.999889	0.999971	0.999975	-1.14034	1.00016	1.1498	1.05808
3370601	3	52786575	52786624	-									0.999952	0.999889	0.999971	0.999975	-1.05171	-1.07094	1.00138	-1.09279
7040300	3	53065414	53065463	+									0.999952	0.999889	0.999971	0.999975	-1.01482	-1.05233	-1.07432	-1.15216
101770056	3	53252896	53252945	-									0.999952	0.999889	0.999971	0.999975	-1.08769	-1.0764	-1.07767	-1.11119
102470164	3	53268418	53268467	+									0.854371	0.999889	0.999971	0.999975	1.19801	1.0579	1.15511	-1.11937
50129	3	53285328	53285377	+									0.999952	0.999889	0.999971	0.999975	-1.03768	-1.02204	1.00227	-1.03225
100610102	3	54027921	54027970	+									0.999952	0.999889	0.999971	0.999975	-1.07708	-1.08332	1.01968	1.09082
360427	3	54532735	54532784	-									0.999952	0.999889	0.999971	0.999975	-1.03406	1.01298	-1.05393	-1.04107
3060692	3	54548546	54548595	+									0.999952	0.999889	0.999971	0.999975	-1.0247	-1.06201	1.02424	-1.07578
4780093	3	54550464	54550513	+									0.999952	0.999889	0.999971	0.999975	-1.01235	1.06941	1.05109	-1.05238
6590097	3	54553266	54553315	+									0.999952	0.999889	0.999971	0.999975	-1.05725	1.02071	1.00274	-1.08292
106960092	3	54607744	54607793	-									0.999952	0.999889	0.999971	0.999975	-1.02193	1.00551	-1.02818	1.05248
3290181	3	54608295	54608344	-									0.737966	0.999889	0.999971	0.999975	-1.20429	-1.06168	-1.06797	-1.13082
5290538	3	54701058	54701107	-									0.999952	0.999889	0.999971	0.999975	-1.09043	-1.03408	1.15141	-1.0628
3360202	3	54939604	54939653	+									0.999952	0.999889	0.999971	0.999975	-1.01763	1.10978	-1.0011	1.05477
102120484	3	54940974	54941023	+									0.999952	0.999889	0.999971	0.999975	-1.0426	1.08962	1.04774	1.00512
100610333	3	55075932	55075981	+									0.999952	0.999889	0.999971	0.999975	1.13788	1.00917	1.02116	-1.07113
102760131	3	55095532	55095581	+									0.999952	0.999889	0.999971	0.999975	1.10998	-1.03071	1.0369	-1.0116
103840020	3	55271681	55271730	+									0.999952	0.999889	0.999971	0.999975	1.03782	-1.10252	-1.05875	1.09604
101170026	3	55281198	55281247	+									0.999952	0.999889	0.999971	0.999975	1.19304	1.11134	1.05967	-1.07087
103450458	3	55325774	55325823	+									0.999952	0.999889	0.768507	0.999975	1.13706	1.01054	-1.29796	-1.04113
2690092	3	55340502	55340551	+									0.999952	0.999889	0.999971	0.999975	1.08527	1.00626	-1.04639	-1.13986
106620717	3	55430466	55430515	-									0.999952	0.999889	0.999971	0.999975	-1.28537	-1.17368	-1.06718	-1.08309
102060397	3	55434065	55434069	-	3	55432471	55432515	-					0.999952	0.999889	0.999971	0.999975	-1.17055	-1.05424	1.0076	1.02567
104070086	3	55756982	55757031	-									0.999952	0.999889	0.999971	0.999975	1.03385	1.08732	1.14125	1.07692
104480022	3	55812156	55812205	+									0.999952	0.999889	0.999971	0.999975	-1.16695	1.02847	-1.05751	-1.24098
107000372	3	55839803	55839836	-	3	55836477	55836492	-					0.622296	0.999889	0.999971	0.999975	-1.77698	-1.52421	1.00001	-1.21754
101090270	3	57259624	57259673	-									0.999952	0.999889	0.999971	0.999975	1.02796	1.10751	-1.05869	-1.0905
1980458	3	57262455	57262504	-									0.999952	0.999889	0.999971	0.519046	1.078	1.0362	1.18213	-1.32634
2480368	3	57449297	57449346	-									0.999952	0.999889	0.999971	0.999975	1.11248	-1.01829	-1.10027	-1.06462
730040	3	57646005	57646054	-									0.999952	0.999889	0.999971	0.999975	1.15001	-1.06457	1.02956	-1.11512
6980092	3	58265187	58265236	+									0.999952	0.999889	0.999971	0.999975	1.12148	1.1072	1.0806	-1.16014
103520435	3	58270571	58270620	+									0.999952	0.999889	0.999971	0.999975	-1.0382	1.1071	-1.03115	1.00264
100940176	3	58354518	58354567	+									0.979974	0.999889	0.999971	0.999975	1.17915	1.03019	1.03991	-1.03652
6100180	3	58359493	58359542	+									0.999952	0.999889	0.999971	0.999975	-1.33583	-1.01635	-1.03819	-1.19283
3390086	3	58361161	58361210	+									0.999952	0.999889	0.999971	0.999975	1.07196	1.07606	1.01389	-1.02228
104780338	3	58396590	58396639	+									0.999952	0.999889	0.999971	0.999975	-1.04567	-1.01435	-1.03568	-1.01575
102450592	3	58396742	58396791	+									0.999952	0.999889	0.999971	0.999975	-1.02036	1.10891	-1.0923	-1.01588
2120707	3	58456167	58456216	+									0.999952	0.999889	0.999971	0.999975	-1.2075	-1.01423	1.04368	-1.217
101570008	3	58592476	58592525	-									0.999952	0.999889	0.999971	0.999975	1.02344	1.07095	-1.11356	1.07768
6100497	3	58918605	58918654	-									0.999952	0.999889	0.999971	0.701516	1.03572	1.01118	-1.00406	-1.20315
2190010	3	59011950	59011999	-									0.999952	0.999889	0.999971	0.999975	-1.11744	1.00667	-1.00461	-1.00998
106940592	3	59121965	59122014	+									0.999952	0.999889	0.999971	0.999975	-1.05072	1.09762	-1.12553	-1.00619
7100048	3	60432861	60432910	+									0.999952	0.999889	0.999971	0.999975	1.15516	1.06226	1.06746	-1.11553
6040121	3	60812677	60812726	+									0.999952	0.00291121	0.0413129	0.202261	-1.15921	-1.82376	-1.50151	-1.38136
102120164	3	62265939	62265988	+									0.999952	0.999889	0.999971	0.999975	-1.01339	1.06756	-1.01077	1.00662
2470465	3	62274362	62274411	-									0.999952	0.999889	0.999971	0.999975	1.01474	-1.02982	-1.00015	-1.08952
5130411	3	62333379	62333428	-									0.999952	0.999889	0.999971	0.999975	-1.01197	1.01942	-1.18029	1.16569
3290156	3	65181596	65181645	+									0.999952	0.999889	0.999971	0.999975	1.10482	1.16561	1.12922	1.07465
1400040	3	65183892	65183941	-									0.999952	0.999889	0.999971	0.999975	-1.00899	-1.1465	-1.02405	1.05835
130273	3	65750675	65750724	-									0.999952	0.999889	0.999971	0.999975	1.0443	-1.03126	-1.02575	-1.12865
103290059	3	65752907	65752956	-									0.595122	0.999889	0.999971	0.999975	-1.4391	-1.17908	-1.04626	-1.31004
101850632	3	66775965	66776014	-									0.999952	0.999889	0.999971	0.0892391	1.09547	-1.03139	1.10183	1.48299
6450059	3	66777271	66777320	-									0.999952	0.999889	0.999971	0.493148	1.10325	-1.09871	1.027	1.30064
4760411	3	66886489	66886538	+									0.605684	0.999889	0.999971	0.999975	-1.49794	-1.46784	1.02267	-1.13094
5670408	3	67161925	67161974	+									0.999952	0.999889	0.999971	0.999975	-1.10014	1.01433	1.01814	-1.08093
4280026	3	67262093	67262142	-									0.999952	0.999889	0.999971	0.999975	1.00931	1.17913	1.08049	-1.05926
105670242	3	67279900	67279949	+									0.833913	0.999889	0.999971	0.999975	-1.17909	1.00362	-1.03834	-1.02172
1240102	3	67407955	67408004	+									0.999952	0.999889	0.999971	0.974058	-1.05258	-1.05541	-1.08737	-1.21092
5390341	3	67860406	67860455	+									0.784901	0.937157	0.999971	0.999975	-1.24458	-1.37463	-1.16026	-1.16386
104670685	3	68401977	68402026	+									0.999952	0.999889	0.999971	0.999975	1.03137	1.12124	1.01125	-1.13163
4560152	3	68424920	68424969	+									0.999952	0.999889	0.999971	0.999975	1.03555	1.04963	-1.07384	1.02355
7100551	3	68502118	68502167	+									0.999952	0.999889	0.0991528	0.999975	-1.04843	-1.0113	-1.27574	1.09691
4210746	3	68696681	68696730	-									0.999952	0.999889	0.999971	0.999975	1.05726	-1.07044	1.06601	-1.01683
102510047	3	68871117	68871166	-									0.999952	0.999889	0.999971	0.999975	-1.07064	1.04494	1.06143	-1.04586
380451	3	69358663	69358712	+									0.999952	0.999889	0.999971	0.999975	1.24993	-1.04526	1.22597	-1.04761
6110286	3	69358927	69358976	+									0.999952	0.999889	0.999971	0.999975	1.03646	-1.04974	1.23084	-1.12338
106200273	3	69361025	69361074	+									0.999952	0.999889	0.999971	0.999975	-1.13348	-1.24128	1.09989	-1.1819
102570082	3	69364445	69364494	+									0.999952	0.999889	0.999971	0.999975	1.1533	1.0811	1.1878	1.01401
3390746	3	69378560	69378609	-									0.999952	0.999889	0.999971	0.999975	1.06992	1.05377	1.01123	1.07821
1570026	3	69552705	69552754	+									0.999952	0.999889	0.999971	0.999975	1.04618	1.00474	1.07372	1.01788
103940707	3	69553396	69553445	+									0.999952	0.999889	0.999971	0.793698	-1.03358	-1.01585	1.01094	-1.33388
4760500	3	75320657	75320706	-									0.938456	0.999889	0.999971	0.999975	1.25591	-1.0365	1.08774	1.00123
2940468	3	75445770	75445819	+									0.999952	0.999889	0.999971	0.999975	-1.11502	-1.04166	1.17213	1.01878
770280	3	76512507	76512556	+									0.00253654	0.541073	1.1e-05	1.03e-08	2.21556	1.68708	2.97902	4.14277
106040195	3	78696117	78696166	-									0.999952	0.999889	0.999971	0.999975	-1.01042	1.03045	1.02927	-1.02168
105080278	3	78867159	78867208	-									0.999952	0.999889	0.999971	0.999975	1.21815	1.03205	-1.0084	1.09334
105220110	3	79036325	79036374	-									0.185212	0.999889	0.0034056	0.641209	1.35666	1.07309	1.61491	1.25839
2680707	3	79407121	79407170	+									0.999952	0.999889	0.999971	0.999975	-1.04731	-1.08764	-1.03804	-1.18543
4670358	3	79409630	79409679	-									0.999952	0.999889	0.999971	0.999975	-1.05539	1.03546	-1.07549	-1.18284
102480315	3	79459486	79459535	-									0.999952	0.999889	0.999971	0.999975	-1.04211	-1.02587	1.00291	1.11233
2690133	3	79746992	79747041	+									0.999952	0.999889	0.999971	0.999975	1.09857	-1.13276	1.03785	1.0154
5080088	3	80492508	80492557	-									0.999952	0.999889	0.999971	0.999975	1.05708	-1.01204	1.00819	-1.18004
106650184	3	80495513	80495562	-									0.999952	0.999889	0.999971	0.999975	1.05404	-1.09576	-1.25007	-1.08342
103850102	3	81725540	81725589	-									0.999952	0.999889	0.999971	0.999975	1.07888	-1.11409	1.04849	1.03991
2970020	3	81836345	81836394	-									0.999952	0.999889	0.999971	0.999975	1.13625	-1.01329	-1.03644	-1.12721
110253	3	81896463	81896512	-									0.999952	0.999889	0.999971	0.999975	1.12852	1.07563	-1.08355	-1.16647
4070037	3	81898142	81898191	-									0.999952	0.999889	0.999971	0.999975	1.04259	-1.0776	-1.15603	-1.11896
2640735	3	81898260	81898309	-									0.999952	0.999889	0.999971	0.999975	1.12278	-1.00732	-1.08714	-1.11495
100840093	3	81911258	81911307	-									0.999952	0.999889	0.999971	0.999975	1.12276	-1.02237	-1.12057	-1.11923
104050484	3	82180915	82180964	+									0.944476	0.999889	0.999971	0.999975	-1.35479	-1.04436	-1.11738	-1.2035
101780215	3	82198956	82199005	+									0.999952	0.999889	0.999971	0.999975	-1.24062	-1.01328	-1.11165	1.12213
6220612	3	82342609	82342658	-									0.999952	0.999889	0.999971	0.999975	1.02955	-1.07293	1.05853	1.0939
4480735	3	82876114	82876163	+									0.999952	0.999889	0.999971	0.622	-1.01924	-1.0232	-1.01856	-1.26705
3830039	3	83702161	83702210	-									0.999952	0.999889	0.999971	0.999975	1.12394	-1.0096	1.01235	1.05748
1170286	3	83964395	83964443	-									0.999952	0.999889	0.999971	0.999975	-1.01901	1.00299	-1.09823	-1.09374
430546	3	83967838	83967887	-									0.999952	0.999889	0.999971	0.999975	-1.03757	1.04759	-1.02251	-1.19886
101740687	3	83993866	83993915	-									0.350673	0.999889	0.999971	0.408315	-1.24728	1.008	-1.15691	-1.24837
2690008	3	84248086	84248135	-									0.999952	0.999889	0.999971	0.999975	1.09667	1.04823	1.00686	-1.05001
3130601	3	84300083	84300132	-									0.999952	0.999889	0.999971	0.999975	1.12848	-1.11279	1.09481	-1.05954
106550168	3	84707650	84707699	+									0.188096	0.999889	0.999971	0.999975	-1.62089	-1.33253	1.01769	-1.19502
101170487	3	84707921	84707970	+									0.277963	0.999889	0.999971	0.999975	-1.73983	-1.32746	1.02818	-1.27643
4210338	3	84756223	84756272	+									0.999952	0.999889	0.999971	0.999975	-1.21762	-1.2418	1.01231	-1.12478
7050280	3	84781473	84781522	+									0.999952	0.999889	0.999971	0.999975	1.02849	-1.04681	-1.02183	-1.02777
780142	3	85448898	85448947	+									0.999952	0.999889	0.999971	0.999975	1.05446	-1.02626	1.01601	1.0134
4200739	3	85456285	85456334	+									0.999952	0.999889	0.999971	0.999975	1.0416	-1.01312	1.00582	1.06128
2260435	3	85458013	85458062	+									0.999952	0.999889	0.999971	0.999975	1.05131	-1.16945	1.05168	-1.08825
6020520	3	85932196	85932245	+									0.999952	0.999889	0.999971	0.999975	1.05089	1.11095	1.11721	-1.02184
104230458	3	85941925	85941974	-									0.188792	0.999889	0.171582	0.104027	-1.31173	-1.26843	-1.33723	-1.35264
2470086	3	85942984	85943033	-									0.333457	0.999889	0.536249	0.809298	1.90366	1.26255	1.88174	1.65451
106520524	3	85946441	85946490	-									0.999952	0.999889	0.999971	0.999975	1.07813	1.08121	-1.1935	-1.09315
104120286	3	86550448	86550497	+									0.999952	0.999889	0.999971	0.999975	1.08618	1.19789	-1.00469	1.01774
3450402	3	86586397	86586446	+									0.722336	0.999889	0.999971	0.999975	1.25682	1.11885	1.05427	1.1188
2510291	3	86590259	86590308	-									0.999952	0.999889	0.999971	0.999975	-1.14209	1.12788	1.09168	-1.03838
2100504	3	86882776	86882825	-									0.839597	0.999889	0.999971	0.316262	-1.18471	-1.04263	1.012	-1.29268
60204	3	87054964	87055013	-									5.16e-07	0.00244388	4.8e-05	0.000224237	6.77592	4.26817	4.74877	4.21394
5360487	3	87343042	87343091	+									0.540274	0.999889	0.199516	0.999975	1.2838	1.22716	1.40817	1.12272
1780288	3	87541762	87541811	+									0.999952	0.999889	0.999971	0.999975	-1.02265	1.08388	1.06324	-1.01315
2850112	3	87662924	87662973	-									0.999952	0.999889	0.999971	0.999975	-1.05362	1.08298	-1.00825	-1.05963
5130114	3	87718869	87718918	+									0.999952	0.999889	0.999971	0.999975	-1.01657	-1.1584	-1.00709	1.06625
6590152	3	87718877	87718926	+									0.999952	0.999889	0.999971	0.999975	-1.02439	-1.11789	1.00301	1.05314
5420066	3	87719712	87719761	+									0.999952	0.999889	0.999971	0.999975	-1.08788	-1.01283	-1.0059	1.04095
1170014	3	87726090	87726139	+									0.999952	0.999889	0.999971	0.999975	-1.12178	-1.03576	-1.03939	-1.10157
104070390	3	87726706	87726755	-									0.999952	0.999889	0.999971	0.999975	-1.12816	1.06294	-1.00233	1.05594
3060408	3	87791811	87791860	-									0.999952	0.999889	0.999971	0.999975	-1.17066	-1.06032	-1.14557	-1.10764
2940736	3	87793114	87793163	-									0.999952	0.999889	0.999971	0.999975	-1.05562	-1.23183	-1.16412	-1.23587
105080168	3	87859258	87859307	+									0.350673	0.999889	0.999971	0.999975	-1.49195	-1.20398	1.05404	1.05601
5900161	3	87859819	87859868	+									0.999952	0.999889	0.999971	0.999975	-1.07637	-1.08396	1.06336	1.05119
510576	3	87860459	87860508	-									0.999952	0.999889	0.999971	0.999975	1.12341	1.1308	1.13501	1.0667
106590427	3	87975872	87975921	+									0.999952	0.999889	0.999971	0.999975	-1.00721	1.07923	-1.02837	-1.05075
104560167	3	88031373	88031422	-									0.999952	0.999889	0.999971	0.999975	1.14846	1.19069	1.15622	-1.20554
540041	3	88086696	88086745	-									0.740548	0.999889	0.999971	0.999975	1.18931	1.09315	1.13832	-1.02965
7100403	3	88117208	88117257	+									0.999952	0.999889	0.999971	0.999975	-1.02084	-1.12782	-1.04285	-1.20188
4780286	3	88131958	88132007	+									0.999952	0.999889	0.999971	0.999975	-1.02655	1.03527	1.0162	-1.01514
520397	3	88132366	88132415	+									0.999952	0.999889	0.999971	0.999975	-1.14401	1.07497	-1.10288	-1.1613
100050647	3	88166145	88166194	+									0.999952	0.999889	0.999971	0.999975	-1.03021	1.05097	1.0212	1.02182
2630093	3	88172202	88172251	+									0.999952	0.999889	0.566334	0.0524357	1.14551	1.24	1.37401	1.57416
3190010	3	88214677	88214726	-									0.999952	0.999889	0.999971	0.999975	-1.10528	1.07139	1.06171	-1.0705
5890022	3	88239977	88240026	-									0.999952	0.999889	0.999971	0.999975	1.03358	1.1267	1.17913	-1.01136
3190167	3	88287147	88287196	-									0.999952	0.999889	0.999971	0.999975	1.11329	1.2051	1.19808	1.13577
520471	3	88287969	88288014	-	3	88287865	88287868	-					0.999952	0.999889	0.999971	0.999975	1.01407	1.08537	1.10056	1.14357
4210020	3	88287992	88288041	-									0.999952	0.999889	0.999971	0.999975	1.18543	1.05903	1.14568	1.0945
1500075	3	88288560	88288609	-									0.999952	0.999889	0.999971	0.999975	1.10569	1.05565	1.16092	1.22535
4480484	3	88353825	88353874	-									0.999952	0.999889	0.999971	0.999975	1.05328	-1.07213	1.00591	-1.06863
102940019	3	88356176	88356225	-									0.213092	0.999889	0.999971	0.999975	-1.31509	1.0952	1.02074	-1.00424
102940014	3	88356818	88356849	-									0.999952	0.999889	0.999971	0.999975	1.10447	-1.04217	1.044	-1.01493
2970278	3	88373270	88373319	+									0.999952	0.999889	0.999971	0.999975	-1.07212	1.03201	-1.01726	-1.02917
5390180	3	88392125	88392174	+									0.999952	0.999889	0.999971	0.999975	-1.17647	1.01175	1.05906	-1.22202
102650082	3	88441670	88441719	+									0.999952	0.999889	0.999971	0.999975	1.05796	1.04835	-1.12674	1.03631
101570148	3	88450738	88450787	+									0.999952	0.999889	0.877906	0.999975	1.06266	1.09599	-1.17368	-1.03509
103870168	3	88505401	88505450	+									0.999952	0.999889	0.999971	0.0571712	1.02484	-1.24847	-1.15969	-1.50193
50348	3	88516531	88516580	+									0.999952	0.999889	0.999971	0.999975	1.10932	1.04828	1.02122	-1.16969
5390338	3	88533469	88533518	+									0.93152	0.999889	0.999971	0.696031	-1.16476	1.03142	-1.03891	-1.22197
102480010	3	88534597	88534646	+									0.999952	0.999889	0.999971	0.999975	-1.0626	1.11839	1.0426	1.00145
630433	3	88549757	88549806	-									0.999952	0.999889	0.999971	0.999975	1.0428	1.03913	1.11263	1.01364
2120497	3	88641206	88641255	+									0.538816	0.999889	0.999971	0.575024	-1.47353	-1.30391	-1.23877	-1.49718
106550411	3	88713907	88713956	+									0.747275	0.999889	0.972168	0.968055	-1.26846	-1.1784	-1.30299	-1.24424
2030026	3	88715281	88715330	-									0.999952	0.999889	0.999971	0.999975	1.03374	1.01399	1.03468	-1.02477
1660528	3	88727631	88727680	-									0.999952	0.999889	0.999971	0.999975	-1.07561	1.04012	1.01491	1.05172
2120039	3	88727645	88727694	-									0.999952	0.999889	0.999971	0.999975	1.04084	1.09898	-1.00361	1.00698
5420593	3	88737489	88737538	-									0.999952	0.999889	0.999971	0.999975	-1.10221	-1.03309	-1.096	-1.0757
100060731	3	88881782	88881831	+									0.999952	0.999889	0.999971	0.999975	-1.04377	-1.17702	-1.13646	-1.01316
2510402	3	88882347	88882396	+									0.999952	0.999889	0.999971	0.999975	-1.07722	-1.23952	-1.10555	-1.15224
6980575	3	88888301	88888350	-									0.999952	0.999889	0.999971	0.999975	-1.25842	1.03009	1.02301	-1.05889
60022	3	88898160	88898209	-									0.999952	0.999889	0.999971	0.999975	-1.18601	1.0791	1.12539	1.08635
106620017	3	88898973	88899021	-									0.999952	0.999889	0.999971	0.999975	-1.04338	1.03001	1.00983	1.14887
3940438	3	88951021	88951070	-									0.999952	0.999889	0.999971	0.795778	-1.12536	-1.17692	-1.02497	-1.24824
2630736	3	88980453	88980502	+									0.999952	0.999889	0.999971	0.999975	-1.07737	-1.05804	-1.07168	-1.13223
2360707	3	88986403	88986452	+									0.658218	0.999889	0.999971	0.999975	-1.23282	1.0233	-1.09112	-1.09354
5910059	3	89013077	89013126	-									0.929014	0.999889	0.999971	0.999975	-1.22057	-1.00063	-1.11888	-1.11947
6550181	3	89014522	89014571	-									0.999952	0.999889	0.999971	0.999975	-1.09494	-1.05759	-1.02507	-1.09864
2360465	3	89030553	89030602	+									0.999952	0.999889	0.999971	0.999975	-1.11312	1.03566	1.13002	-1.03599
4590010	3	89038433	89038482	-									0.999952	0.999889	0.999971	0.999975	-1.05756	1.02714	-1.09607	-1.10743
5220040	3	89053558	89053607	+									0.69484	0.999889	0.999971	0.999975	-1.18511	1.00483	-1.07553	-1.05929
50039	3	89070845	89070894	+									0.352659	0.999889	0.999971	0.999975	-1.34963	1.09624	-1.10676	-1.17505
1450008	3	89072171	89072220	-									0.999952	0.999889	0.999971	0.999975	1.08634	1.04236	1.02824	-1.06405
3840672	3	89075749	89075798	-									0.999952	0.999889	0.999971	0.999975	-1.04684	1.04905	-1.20665	-1.16652
5890707	3	89143652	89143701	-									0.999952	0.999889	0.999971	0.999975	1.06149	-1.02096	1.13139	1.13025
2630563	3	89207104	89207153	-									0.96019	0.999889	0.999971	0.999975	-1.18226	1.00805	1.00351	-1.13295
360494	3	89238978	89239027	+									0.999952	0.999889	0.999971	0.999975	1.00211	-1.04071	-1.02107	-1.02779
70131	3	89252109	89252158	+									0.977797	0.999889	0.999971	0.885642	-1.18784	-1.12947	1.14738	-1.23259
106130452	3	89254770	89254819	+									0.999952	0.999889	0.999971	0.999975	1.03337	1.13262	-1.05695	-1.11312
4010750	3	89272561	89272610	+									0.999952	0.999889	0.999971	0.999975	-1.12974	-1.00836	-1.00756	-1.00295
102120088	3	89557094	89557143	+									0.999952	0.999889	0.999971	0.999975	-1.16732	-1.15224	-1.16656	-1.0142
3120739	3	89557533	89557582	-									0.999952	0.999889	0.999971	0.999975	-1.04146	-1.15366	1.03571	-1.13697
5720484	3	89571519	89571568	-									0.999952	0.999889	0.999971	0.999975	1.01074	-1.1287	-1.14807	-1.11068
2350114	3	89586520	89586569	+									0.999952	0.999889	0.999971	0.999975	1.02797	1.00897	-1.04551	-1.05864
610348	3	89587727	89587776	+									0.999952	0.999889	0.999971	0.999975	1.12168	1.03025	-1.03388	-1.09205
5690390	3	89799736	89799756	-	3	89799603	89799632	-					0.999952	0.999889	0.999971	0.999975	-1.12202	-1.01626	1.01035	-1.10223
4150670	3	89799740	89799789	-									0.999952	0.999889	0.999971	0.999975	-1.23431	-1.0157	-1.02655	-1.13609
6650133	3	89804081	89804130	-									0.999952	0.999889	0.999971	0.428305	-1.0764	-1.01104	1.03819	-1.2236
100110706	3	89804452	89804501	-									0.733761	0.999889	0.999971	0.999975	-1.25018	1.07247	-1.09877	-1.01973
4120128	3	89812198	89812247	-									0.999952	0.999889	0.999971	0.999975	-1.09853	-1.08015	-1.07431	-1.15383
100050452	3	89846036	89846085	-									0.999952	0.999889	0.999971	0.999975	1.16981	-1.07779	-1.01207	-1.08185
2350524	3	89865627	89865676	+									0.999952	0.999889	0.999971	0.999975	-1.02333	1.01198	1.02151	-1.13981
4230411	3	89865879	89865928	+									0.999952	0.999889	0.999971	0.999975	-1.03764	1.03599	1.07704	-1.10626
6510619	3	89866059	89866108	+									0.999952	0.999889	0.999971	0.999975	-1.02998	-1.07307	1.04407	-1.07543
6650471	3	89892345	89892394	+									0.999952	0.999889	0.999971	0.999975	-1.10993	-1.21734	1.03181	-1.0512
101990167	3	89892975	89893024	+									0.999952	0.999889	0.999971	0.999975	-1.26091	-1.36753	-1.10756	-1.15465
670600	3	89903469	89903518	+									0.999952	0.999889	0.999971	0.999975	-1.02577	-1.22218	-1.05873	-1.08079
5670167	3	89904322	89904371	+									0.999952	0.999889	0.999971	0.999975	1.19374	-1.08226	-1.03411	-1.07917
5270242	3	90017139	90017188	-									0.999952	0.999889	0.999971	0.999975	-1.16779	-1.08455	1.07128	1.02295
6980400	3	90039351	90039400	+									0.999952	0.999889	0.999971	0.999975	-1.09588	1.01494	1.05135	-1.13168
2570180	3	90057362	90057411	+									0.999952	0.999889	0.999971	0.999975	-1.03324	-1.10358	-1.06578	-1.09574
6650195	3	90161879	90161928	+									0.831054	0.999889	0.999971	0.999975	-1.47617	-1.19714	-1.08218	-1.2386
100840068	3	90166741	90166790	+									0.999952	0.999889	0.999971	0.999975	-1.10236	-1.00617	-1.07819	-1.10521
6590309	3	90189184	90189233	-									0.999952	0.999889	0.999971	0.999975	-1.14877	-1.03037	1.0422	-1.11292
2850494	3	90195468	90195517	-									0.999952	0.999889	0.999971	0.999975	1.00669	1.09248	1.04155	-1.04315
6620064	3	90195836	90195885	-									0.999952	0.999889	0.999971	0.999975	-1.00001	-1.08308	1.06101	-1.03007
103390706	3	90211974	90212023	-									0.999952	0.999889	0.999971	0.999975	1.06114	-1.02301	-1.05396	-1.14224
2900253	3	90291723	90291772	+									0.999952	0.999889	0.999971	0.999975	-1.02573	-1.00272	1.0519	-1.06
6130551	3	90302988	90303037	-									0.999952	0.999889	0.999971	0.999975	-1.12701	1.07745	1.0525	-1.13821
6770707	3	90318136	90318185	-									0.47541	0.999889	0.999971	0.999975	-1.6351	-1.27085	-1.22076	-1.18894
520019	3	90319871	90319920	+									0.999952	0.999889	0.999971	0.66173	-1.15807	1.13101	1.00047	1.33909
2510546	3	90346624	90346673	+									0.574401	0.999889	0.999971	0.999975	-1.25194	-1.01835	-1.00005	1.02109
1690204	3	90418228	90418277	+									0.999952	0.999889	0.999971	0.999975	-1.23129	-1.07201	-1.00496	-1.04728
50538	3	91884237	91884286	-									0.421569	0.999889	0.999971	0.737924	-1.32689	-1.28467	-1.12572	-1.27921
101980070	3	93082741	93082790	+									0.999952	0.999889	0.999971	0.999975	1.0251	-1.00899	-1.03732	1.05097
6350010	3	93368411	93368460	+									0.999952	0.999889	0.999971	0.999975	-1.02121	-1.16877	1.00883	-1.11328
4540102	3	94229982	94230031	+									0.999952	0.999889	0.999971	0.999975	-1.01208	1.18527	1.16479	1.00848
3140671	3	94235198	94235247	+									0.999952	0.999889	0.999971	0.999975	-1.08875	-1.04569	1.02602	-1.07195
580079	3	94251951	94252000	+									0.999952	0.999889	0.999971	0.999975	-1.03353	-1.01116	-1.03891	-1.07641
103120369	3	94252067	94252116	+									0.999952	0.999889	0.999971	0.999975	-1.06169	1.03127	-1.08869	1.02264
2940044	3	94268934	94268983	-									0.506351	0.999889	0.999971	0.999975	1.47157	1.41545	1.38736	1.31936
100670563	3	94301678	94301727	-									0.999952	0.999889	0.999971	0.999975	-1.05074	1.096	1.06816	1.04618
101780139	3	94305216	94305265	-									0.999952	0.999889	0.999971	0.999975	-1.19401	-1.03414	-1.20892	-1.32251
106940487	3	94305282	94305331	-									0.999952	0.999889	0.999971	0.817903	-1.19585	-1.09546	-1.25211	-1.50196
100670411	3	94305314	94305363	-									0.999952	0.999889	0.999971	0.741608	-1.15533	-1.03871	-1.30531	-1.51998
2370010	3	94416746	94416795	-									0.38839	0.771307	0.999971	0.000184489	-1.29449	-1.34814	1.12555	-1.78687
870348	3	94684414	94684463	+									0.999952	0.999889	0.999971	0.999975	-1.03576	1.02929	1.04779	-1.10304
520402	3	94688862	94688911	-									0.999952	0.999889	0.999971	0.999975	-1.07124	1.03171	1.06235	-1.02242
2650372	3	94747787	94747836	+									0.999952	0.999889	0.999971	0.999975	-1.11247	-1.09396	1.02927	-1.11421
3850575	3	94748046	94748095	+									0.841946	0.999889	0.999971	0.999975	-1.18923	-1.07359	-1.01938	-1.05564
100020356	3	94764929	94764978	+									0.999952	0.999889	0.999971	0.999975	-1.07384	-1.02099	-1.02862	-1.00482
104210377	3	94783497	94783546	+									0.987465	0.999889	0.999971	0.999975	1.16591	1.05628	-1.01068	-1.10805
101850446	3	94806791	94806840	+									0.999952	0.999889	0.999971	0.999975	1.05294	-1.07258	-1.12769	-1.12504
1780452	3	94810248	94810297	+									0.999952	0.999889	0.999971	0.862561	-1.11106	-1.13495	-1.09785	-1.37856
430068	3	94836654	94836703	-									0.999952	0.999889	0.999971	0.999975	-1.07301	1.08172	1.0416	1.0425
100780079	3	94862991	94863040	-									0.999952	0.999889	0.999971	0.999975	1.20293	1.00262	-1.07108	-1.06216
3450113	3	94863589	94863638	-									0.999952	0.999889	0.999971	0.999975	1.05085	1.05155	-1.0427	-1.03506
6380278	3	94868330	94868379	-									0.999952	0.999889	0.999971	0.999975	1.1019	-1.04359	1.02824	-1.08661
2450181	3	94926458	94926507	+									0.517032	0.999889	0.999971	0.999975	-1.28155	-1.05562	1.00822	-1.10946
5910520	3	94933069	94933118	+									0.999952	0.999889	0.999971	0.999975	1.00254	1.01581	-1.08731	-1.07103
102030301	3	94933697	94933746	-									0.999952	0.999889	0.999971	0.999975	1.06471	-1.01671	1.0461	1.0182
100360162	3	94934175	94934224	-									0.999952	0.999889	0.999971	0.999975	-1.02388	1.04296	1.05459	1.03762
6350524	3	94943349	94943398	+									0.999952	0.999889	0.999971	0.999975	-1.03108	1.00422	1.02577	-1.1982
101770025	3	94977822	94977871	+									0.999952	0.999889	0.999971	0.999975	1.04908	1.06429	1.09326	-1.07307
5080278	3	95023109	95023158	-									0.999952	0.999889	0.999971	0.999975	-1.07037	1.07764	1.05655	1.00477
510037	3	95040162	95040211	+									0.999952	0.999889	0.999971	0.999975	-1.02129	1.14269	1.02511	-1.08088
630538	3	95057962	95058011	-									0.772596	0.999889	0.999971	0.999975	-1.20047	-1.17474	-1.09648	-1.10124
3290110	3	95099978	95100027	+									0.658218	0.999889	0.999971	0.999975	-1.20421	-1.03893	-1.06143	-1.03288
2850446	3	95115433	95115482	-									0.00993017	0.999889	0.999971	0.999975	-1.32145	-1.18937	-1.12025	-1.08406
4120086	3	95126090	95126139	+									0.999952	0.999889	0.999971	0.999975	-1.05605	1.00586	1.05725	-1.06431
[truncated: 10,172 more rows]

## Sheet: b)
Gene						No. of probes showing more expression in HAB				No. of probes showing less expression in HAB
Symbol	MGI ID	Chr	Start	End	No. of probes	CeA	BLA	PVN	Cg	CeA	BLA	PVN	Cg
Lman2l	2443010	1	36478910	36502116	2	0	0	0	0	0	0	2	0
1500015O10Rik	1926146	1	43787447	43799423	1	0	0	1	0	0	0	0	0
Ercc5	103582	1	44204692	44238105	1	1	0	1	1	0	0	0	0
Aox1	88035	1	58086775	58163257	1	0	0	0	0	0	0	1	0
Als2cr4	2138365	1	59157437	59176940	1	0	0	0	0	1	0	1	1
Igfbp2	96437	1	72871077	72899048	1	0	0	0	0	0	0	0	1
Tns1	104552	1	73956805	74171021	1	0	0	0	0	0	0	1	0
Rufy4	3588214	1	74172115	74194797	1	0	0	0	0	0	0	1	0
Col6a3	88461	1	92663435	92740529	1	0	0	0	0	1	0	1	0
Gin1	2182036	1	99666749	99690286	1	0	0	1	1	0	0	0	0
C1ql2	3032521	1	122237159	122239751	1	0	0	0	1	0	0	0	0
Cntn2	104518	1	134406002	134439517	1	0	0	0	0	1	0	1	1
BC003331	2385108	1	152208435	152240210	1	1	1	1	1	0	0	0	0
Tpr	1922066	1	152239968	152297062	1	1	1	1	1	0	0	0	0
Rgs16	108407	1	155587479	155592598	1	0	0	0	0	0	0	0	1
Tstd1	3648482	1	173349164	173350485	1	1	0	1	0	0	0	0	0
Kcnh1	1341721	1	194014666	194334041	1	0	0	0	0	1	0	1	1
Pip4k2a	1298206	2	18763882	18919753	1	0	0	0	0	1	1	1	1
Etl4	95454	2	19831407	20732340	1	0	0	0	1	0	0	0	0
Ehmt1	1924933	2	24646289	24775129	1	0	0	0	0	1	0	0	0
Abca2	99606	2	25284223	25304060	1	1	1	1	1	0	0	0	0
Fam125b	1919793	2	33585473	33743466	1	0	0	1	0	0	0	0	0
Lypd6	2443848	2	49921982	50049084	1	1	0	1	1	0	0	0	0
Rapgef4	1917723	2	71819297	72095531	1	0	0	0	1	0	0	0	0
Ttc17	1921819	2	94140924	94246845	1	1	1	1	1	0	0	0	0
Fjx1	1341907	2	102289523	102292656	1	0	0	0	0	1	0	0	0
Slc1a2	101931	2	102498816	102630941	2	1	2	2	1	0	0	0	0
Cd59a	109177	2	103935958	103955511	1	1	0	1	0	0	0	0	0
D430041D05Rik	2181743	2	103983230	104250150	2	2	0	0	1	0	0	0	0
Atpbd4	1913882	2	114342152	114480700	1	0	0	0	0	0	0	1	0
Meis2	108564	2	115688800	115891575	1	0	0	0	0	1	0	0	1
Mtap1a	1306776	2	121115336	121136568	1	0	0	0	0	1	0	0	0
Dut	1346051	2	125072926	125084344	1	0	0	0	0	1	1	1	1
Avp	88121	2	130406356	130408290	1	0	0	0	0	1	0	0	0
Pygb	97828	2	150612471	150657494	1	0	0	0	0	1	1	1	1
Abhd12	1923442	2	150658229	150730477	1	0	0	0	0	1	0	0	0
Ninl	1925427	2	150760255	150865118	1	0	0	0	0	1	1	1	1
Pofut1	2153207	2	153067269	153095983	1	0	0	0	0	1	0	0	0
Snta1	101772	2	154202049	154233835	1	0	0	1	1	0	0	0	0
Zfp341	2682937	2	154439033	154472557	1	1	1	1	1	0	0	0	0
Chmp4b	1922858	2	154477441	154520521	2	0	0	0	0	1	1	2	1
Ahcy	87968	2	154885046	154900233	1	1	1	1	1	0	0	0	0
Map1lc3a	1915661	2	155102033	155103809	1	1	0	0	1	0	0	0	0
Uqcc	1929472	2	155672630	155756046	1	1	0	0	0	0	0	0	0
Spag4	2444120	2	155890911	155896353	1	0	0	1	1	0	0	0	0
9830001H06Rik	2444575	2	156841535	156904990	1	0	0	0	0	1	0	1	0
Ghrh	95709	2	157155233	157173242	1	0	0	0	0	1	0	1	0
Manbal	1916411	2	157193330	157222499	1	1	1	1	1	0	0	0	0
Ctnnbl1	1913892	2	157563137	157717350	1	0	0	0	0	1	0	1	1
Ptgis	1097156	2	167017305	167066104	2	0	0	2	0	0	0	0	0
Nfatc2	102463	2	168301910	168427157	1	0	0	1	0	0	0	0	0
Dok5	1924079	2	170557307	170705269	1	0	0	0	0	0	0	1	1
Col20a1	1920618	2	180721240	180752245	1	1	0	0	0	0	0	0	0
Zfp704	2180715	3	9429938	9610085	1	0	0	0	0	0	0	1	0
3110057O12Rik	1915468	3	40698067	40742060	1	0	0	0	1	0	0	0	0
Slc7a11	1347355	3	50168858	50247535	1	1	1	1	1	0	0	0	0
Ccrn4l	109382	3	51028369	51055566	1	0	0	0	0	1	1	1	1
P2ry1	105049	3	60806717	60812901	1	0	0	0	0	0	1	0	1
Fstl5	2442179	3	75878192	76513941	1	1	0	1	1	0	0	0	0
Gm3491	3781668	3	78983150	79091953	1	0	0	0	1	0	0	0	0
Fcrls	1933397	3	87054680	87067660	1	1	1	1	1	0	0	0	0
Tuft1	109572	3	94416679	94462794	1	0	0	0	0	0	0	1	0
Hmgcs2	101939	3	98084358	98114661	1	0	0	0	0	1	0	1	0
Synpo2	2153070	3	122779437	122939067	1	1	0	0	0	0	0	0	0
Eltd1	2655562	3	151100851	151208050	1	0	0	0	0	0	0	1	0
St6galnac3	1341828	3	152865473	153388026	1	0	0	0	0	1	0	0	1
Lrrc40	1914394	3	157699626	157731442	1	0	0	0	0	1	1	1	1
Runx1t1	104793	4	13670583	13820796	1	0	0	0	0	1	0	1	1
Tmem55a	1919769	4	14791223	14842323	1	0	0	0	0	1	0	0	0
Pou3f2	101895	4	22413791	22415480	1	0	0	0	0	0	0	1	0
Rgp1	1915956	4	43591587	43600359	1	1	0	1	1	0	0	0	0
Hint2	1916167	4	43667099	43669338	1	1	1	1	1	0	0	0	0
Glipr2	1917770	4	43970273	43991990	1	0	0	0	0	1	1	1	1
Frmd3	2442466	4	73659346	73848118	1	0	0	0	0	1	0	1	0
Tusc1	2684283	4	93000829	93002202	1	0	0	0	0	1	0	0	1
Fam151a	2657115	4	106406494	106420897	1	0	0	0	0	0	0	1	0
Acot11	1913736	4	106417160	106477603	1	0	0	0	0	0	0	1	0
Mutyh	1917853	4	116480328	116492045	1	1	0	1	0	0	0	0	0
Hectd3	1923858	4	116667922	116677882	1	0	0	0	0	0	0	1	0
Hyi	1915430	4	118032595	118035349	1	0	0	1	1	0	0	0	0
Tmem125	1923409	4	118213546	118216649	1	1	0	1	1	0	0	0	0
Ccdc30	1920582	4	118995498	119088126	1	0	0	0	0	1	1	1	1
Hivep3	106589	4	119406389	119810650	1	0	0	0	1	0	0	0	0
Cap1	88262	4	122536290	122563299	1	0	0	1	0	0	0	0	0
C1qb	88224	4	136436044	136442102	1	0	0	0	0	1	0	1	1
Sh2d5	2446215	4	137806318	137817247	1	0	0	0	0	1	0	0	0
Kif17	1098229	4	137806350	137857882	1	0	0	0	0	1	0	0	0
Aldh4a1	2443883	4	139178781	139205605	1	0	0	0	0	1	1	1	1
Aurkaip1	1913327	4	155205381	155207239	1	0	0	0	0	1	1	1	1
Gltpd1	1933107	4	155238832	155243549	1	1	1	1	1	0	0	0	0
Fam132a	1914639	4	155336427	155340738	1	0	0	0	0	0	0	1	0
B3galt6	2152819	4	155363575	155366758	1	0	0	0	0	1	1	1	1
Sdf4	108079	4	155366981	155387719	1	1	0	1	1	0	0	0	0
Klhl17	2678948	4	155603445	155608903	1	1	0	0	1	0	0	0	0
Abcb4	97569	5	8893717	8959225	1	1	0	1	1	0	0	0	0
Mll5	1924825	5	22940259	23010053	1	0	0	0	0	1	0	1	0
Fam126a	2149839	5	23421094	23536508	1	0	0	0	0	1	0	1	0
Kcnh2	1341722	5	23825407	23857422	1	1	0	1	0	0	0	0	0
Abcb8	1351667	5	23899481	23915872	1	0	0	0	0	1	0	0	0
Rbm33	1919670	5	28643661	28745784	1	0	0	0	0	1	0	1	0
Slc30a3	1345280	5	31388479	31395988	1	1	0	0	0	0	0	0	0
Jakmip1	1923321	5	37438671	37539255	1	0	0	0	0	1	0	1	0
Shisa3	3041225	5	67999122	68014791	1	0	0	0	0	1	0	1	1
Atp8a1	1330848	5	68009379	68238671	1	0	0	0	0	1	0	1	1
Cox18	2448532	5	90643749	90653026	1	0	0	0	0	1	0	0	1
Coq2	1919133	5	101083742	101104159	1	0	0	1	1	0	0	0	0
Hsd17b11	2149821	5	104418781	104450938	1	1	0	0	1	0	0	0	0
Tmem175	1919642	5	109058789	109076789	2	1	1	0	1	0	0	1	0
Dgkq	102918	5	109075712	109098691	1	1	1	0	1	0	0	0	0
Pxmp2	107487	5	110703301	110715205	1	0	0	1	0	0	0	0	0
1500011B03Rik	1913486	5	115258205	115273477	1	0	0	0	0	1	0	1	1
2610524H06Rik	2447819	5	115271946	115273477	1	0	0	0	0	1	0	1	1
Hspb8	2135756	5	116858500	116872873	1	0	0	0	0	0	0	0	1
Srrm4	1916205	5	116889281	116917869	1	0	0	1	0	0	0	0	0
2410131K14Rik	1924042	5	118695236	118716102	1	1	1	1	1	0	0	0	0
Sdsl	2182607	5	120908195	120922819	1	0	0	0	0	0	0	1	0
Aldh2	99600	5	122016036	122043833	1	0	0	0	0	0	0	1	0
Ache	87876	5	137728747	137735694	1	0	0	0	0	1	0	0	0
Katnal1	2387638	5	149685908	149806799	1	0	0	0	1	0	0	0	0
Tac1	98474	6	7505071	7512973	1	0	0	0	0	0	0	1	0
Cttnbp2	1353467	6	18316478	18465338	1	1	0	0	1	0	0	0	0
Tmem176a	1913308	6	48791508	48795363	1	0	0	0	0	1	0	0	0
Il12rb2	1270861	6	67241312	67326182	1	0	0	1	0	0	0	0	0
Podxl2	2442488	6	88792552	88825038	1	1	0	1	1	0	0	0	0
Slc41a3	1918949	6	90554719	90596406	1	0	0	0	1	0	0	0	0
Magi1	1203522	6	93628030	94233316	2	0	0	0	0	0	0	1	1
Cntn6	1858223	6	104442784	104813400	1	0	0	0	0	0	0	1	0
Gm7292	3645786	6	117666491	117667485	1	0	0	0	0	1	1	1	1
BC048546	3039594	6	128490300	128531624	1	0	0	0	0	1	0	0	1
Aebp2	1338038	6	140570970	140626993	2	0	0	0	0	2	2	2	2
Slco1c1	1889679	6	141472907	141518241	1	0	0	0	0	1	1	1	1
Etnk1	1922570	6	143115750	143155140	2	0	0	0	0	2	0	0	1
Sox5	98367	6	143776945	144730497	1	1	0	0	1	0	0	0	0
Kras	96680	6	145165219	145198759	1	0	0	0	0	1	1	1	1
Ppfibp1	1914783	6	146837009	146980547	1	1	0	0	0	0	0	0	0
Gm5887	3645619	6	147023582	147035554	1	0	0	0	0	0	0	1	0
Ttyh1	1889007	7	4071010	4088308	2	0	0	0	0	1	0	1	1
D030047H15Rik	3698136	7	4077942	4088528	2	0	0	0	0	1	0	1	1
Tnnt1	1333868	7	4456265	4467577	1	0	0	1	0	0	0	0	0
Usp29	1888998	7	6683452	6919931	1	1	0	1	1	0	0	0	0
Kptn	1890380	7	16705244	16712865	1	0	0	0	0	0	0	1	0
Ccdc9	1921443	7	16859394	16872144	1	0	0	0	0	0	0	1	0
Ercc1	95412	7	19930127	19941873	2	1	1	1	2	0	0	0	0
1700008P20Rik	1916551	7	25118222	25118917	1	0	0	0	0	1	0	1	1
Lypd3	1919684	7	25421589	25426137	1	1	0	1	0	0	0	0	0
Pop4	1913411	7	39047839	39056367	1	0	0	0	0	1	1	1	1
Aspdh	1915602	7	51720761	51723127	1	1	0	1	1	0	0	0	0
Fuz	1917550	7	52151463	52155993	1	0	0	0	0	1	1	1	1
Tead2	104904	7	52471123	52489005	1	1	0	0	0	0	0	0	0
Fam189a1	1917888	7	71900999	72301456	1	1	0	0	0	0	0	0	0
Trpc2	109527	7	109214025	109245378	1	1	0	0	1	0	0	0	0
Hbb-b1	96021	7	110961038	110962510	2	0	0	1	0	1	0	1	1
Hbb-b2	96022	7	110975048	110976610	2	2	2	2	2	0	0	0	0
Prkcdbp	1923422	7	112629130	112630711	1	0	0	0	0	0	0	1	0
Apbb1	107765	7	112707000	112729735	1	0	0	0	0	1	0	1	1
Tpp1	1336194	7	112893532	112900743	1	0	0	0	0	0	0	1	0
Ric3	2443887	7	116177826	116226845	1	0	0	0	0	1	1	1	1
Rnf141	1914400	7	117957045	117987958	1	0	0	1	0	0	0	0	0
Dkk3	1354952	7	119259537	119301933	1	1	0	0	0	0	0	0	0
Cdr2	1100885	7	128100550	128125826	1	0	0	0	0	1	0	0	0
Prkcb	97596	7	129432265	129777916	1	0	0	0	0	1	1	0	1
Nupr1	1891834	7	133766763	133770524	1	0	0	0	0	0	1	0	1
Ccdc101	1922815	7	133792823	133816439	1	1	0	1	1	0	0	0	0
Gdpd3	1915866	7	133909928	133919157	1	1	1	1	1	0	0	0	0
Ypel3	1913340	7	133920469	133924028	1	1	0	1	1	0	0	0	0
Fam57b	1916202	7	133963344	133973728	1	0	0	1	0	0	0	0	0
Dctpp1	1913672	7	134400473	134404223	1	1	0	0	0	0	0	0	0
Cox6a2	104649	7	135349128	135349830	1	1	1	1	1	0	0	0	0
Tgfb1i1	102784	7	135390385	135397226	1	0	0	0	0	0	0	0	1
Fgfr2	95523	7	137305965	140315033	1	0	0	0	0	1	0	0	0
1190003J15Rik	1916142	7	148020917	148023865	1	0	0	0	0	0	0	0	1
Cars	1351477	7	150743135	150785995	1	1	1	1	1	0	0	0	0
Arhgef10	2444453	8	14911663	15001085	1	1	1	1	1	0	0	0	0
Brf2	1913903	8	28234304	28239104	1	0	0	0	0	1	1	1	1
Got1l1	1923865	8	28307932	28313019	1	0	0	1	0	0	0	0	0
Sc4mol	1913484	8	67196936	67212589	1	0	0	0	0	1	1	1	1
Gmip	1926066	8	72332578	72345769	1	0	0	0	0	0	0	1	0
Ndufa13	1914434	8	72418087	72425547	1	1	1	1	1	0	0	0	0
Jund	96648	8	73222848	73224514	1	0	0	0	0	1	0	0	0
Haus8	1923728	8	73772460	73796833	1	0	0	0	0	1	0	0	0
5430437P03Rik	1915501	8	73920767	73928444	1	0	0	0	0	1	0	0	0
Rnaseh2a	1916974	8	87480509	87493666	1	0	0	0	0	1	0	0	0
BC056474	3041257	8	87604639	87606238	1	0	0	0	0	1	0	1	0
Man2b1	107286	8	87607223	87621493	1	0	0	0	0	1	0	0	0
Agrp	892013	8	108090600	108092198	1	0	0	0	0	0	0	1	0
Galnt2	894694	8	122434741	126869624	1	0	0	0	0	1	0	1	1
Pard3	2135608	8	129587793	130136186	1	0	0	0	0	1	0	0	0
Robo4	1921394	9	37209482	37221608	1	0	0	0	0	0	0	1	0
Vsig2	1928009	9	37346840	37351790	1	0	0	0	0	0	0	0	1
Rnf26	2388131	9	43874410	43921600	1	0	0	0	0	1	0	1	0
Mfrp	2385957	9	43909821	43917270	1	0	0	0	0	1	0	1	0
C1qtnf5	2385958	9	43915328	43917270	1	0	0	0	0	1	0	1	0
Pdzd3	2429554	9	44055401	44059547	1	0	0	0	0	1	0	0	0
Hyou1	108030	9	44187573	44200452	1	0	0	0	0	0	0	1	0
Ddx6	104976	9	44412981	44445189	2	0	0	0	0	1	0	1	2
Megf11	1920951	9	64233433	64557012	1	0	0	0	0	0	0	1	0
Hmgn3	2138069	9	83003555	83040292	1	1	1	1	1	0	0	0	0
Bcl2a1d	1278325	9	88618126	88626688	1	1	0	1	1	0	0	0	0
Tmie	2159400	9	110768215	110782617	1	0	0	0	0	1	0	1	0
Glb1	88151	9	114310237	114383495	1	0	0	0	0	0	0	1	0
Sec22c	2447871	9	121592140	121614608	1	0	0	1	0	0	0	0	0
Ccbp2	1891697	9	121807582	121820182	1	0	0	0	0	0	0	0	1
Syne1	1927152	10	4795849	5326338	1	0	0	0	0	1	0	1	0
Zfp365	2143676	10	67348851	67375410	1	1	1	0	1	0	0	0	0
Ube2d1	2384911	10	70717728	70748010	1	0	0	0	0	0	0	1	0
Col6a1	88459	10	76171537	76188913	1	0	0	0	1	0	0	0	0
Pdxk	1351869	10	77899489	77927720	1	0	0	0	0	1	0	0	0
Slc25a3	1353498	10	90579538	90586712	1	1	0	1	1	0	0	0	0
Tmtc2	1914057	10	104624719	105011507	1	0	0	0	0	0	0	1	0
Srgap1	2152936	10	121218047	121484371	1	0	0	0	0	1	0	0	0
Kif5a	109564	10	126662755	126700136	1	0	0	0	0	1	0	0	0
Sf3a1	1914715	11	4060353	4082544	1	1	0	0	1	0	0	0	0
Gatsl3	1919212	11	4118228	4122412	1	0	0	0	0	0	0	1	0
Ccdc88a	1925177	11	29273658	29410808	1	0	0	0	0	1	1	1	1
Mtif2	1924034	11	29426408	29445279	2	0	0	0	0	2	2	2	2
Rtn4	1915835	11	29592947	29644331	1	1	1	1	1	0	0	0	0
Eml6	2442895	11	29643051	29926033	1	1	1	1	1	0	0	0	0
Nprl3	109258	11	32125628	32167707	1	1	0	0	1	0	0	0	0
Mpg	97073	11	32126505	32132700	1	1	0	0	1	0	0	0	0
Tbc1d9b	1924045	11	49944898	49986287	1	0	1	1	1	0	0	0	0
Ltc4s	107498	11	50049971	50052118	1	1	0	0	0	0	0	0	0
Aff4	2136171	11	53164335	53235332	1	1	1	0	1	0	0	0	0
Hist3h2ba	1925553	11	58762422	58763035	1	0	0	0	0	0	0	1	1
Trim11	2137355	11	58791595	58804960	1	1	0	1	1	0	0	0	0
Lrrc48	1921915	11	60166831	60207843	1	0	0	1	1	0	0	0	0
Atpaf2	2180561	11	60214128	60231959	1	0	0	0	0	1	0	0	0
Aldh3a1	1353451	11	61021039	61031923	1	0	0	1	0	0	0	0	1
Aldh3a2	1353452	11	61036919	61080966	1	1	1	1	1	0	0	0	0
Epn2	1333766	11	61330751	61393187	1	1	0	0	1	0	0	0	0
Prpsap2	2384838	11	61543156	61575564	1	0	0	1	0	0	0	0	0
Cytsb	2442356	11	61770281	62036507	1	0	0	0	0	0	0	0	1
Zswim7	1916997	11	62080726	62094877	1	0	0	0	0	0	0	1	0
Ttc19	1920045	11	62094975	62141953	1	0	0	1	0	0	0	0	0
Pigl	2681271	11	62271787	62329795	1	0	0	0	0	0	1	1	1
BC046404	2682293	11	62418386	62462025	1	1	0	0	0	0	0	0	0
Mmgt2	2448491	11	62462241	62479856	1	1	0	0	1	0	0	0	0
Zfp286	2384758	11	62566879	62602964	1	1	1	0	1	0	0	0	0
Pmp22	97631	11	62942484	62973049	1	1	1	1	1	0	0	0	0
Hs3st3a1	1333861	11	64248834	64336343	1	0	0	0	0	0	0	0	1
Elac2	1890496	11	64792540	64815571	1	0	0	0	0	1	0	1	1
Ndel1	1932915	11	68634936	68685360	1	1	0	0	0	0	0	0	0
Tax1bp3	1923531	11	72990585	72996664	2	0	0	2	2	0	0	0	0
Samd14	2384945	11	94871193	94887401	1	0	0	0	0	0	0	1	0
Pdk2	1343087	11	94887572	94902668	1	0	0	0	0	1	1	1	1
Myst2	2182799	11	95135573	95171560	1	0	0	0	0	1	1	1	1
Fam117a	2144564	11	95198332	95243186	1	0	0	0	0	1	0	0	0
Kcnj16	1314842	11	110829347	110889282	1	1	1	0	1	0	0	0	0
Npb	2387153	11	120469791	120470407	1	0	0	0	0	0	0	1	0
Sirt7	2385849	11	120479686	120486554	1	1	1	1	1	0	0	0	0
Myadml2	1915765	11	120507345	120509472	1	1	0	1	1	0	0	0	0
Rfng	894275	11	120642060	120645521	2	1	1	1	1	0	0	1	1
Dus1l	1915980	11	120650515	120657717	2	2	1	1	1	0	0	0	0
Ccdc57	1918526	11	120687843	120794186	1	1	0	0	0	0	0	0	0
1110031I02Rik	1913429	11	121038905	121066025	1	0	0	0	0	1	0	0	1
Hexdc	3605542	11	121065749	121083961	1	0	0	0	0	1	0	1	1
Tbcd	1919686	11	121313263	121478478	1	0	0	0	0	0	0	1	0
B3gntl1	2441705	11	121477511	121534467	2	0	0	0	0	1	0	2	1
Twistnb	106292	12	34114509	34122945	2	2	0	2	1	0	0	0	0
Rhoj	1931551	12	76409309	76502443	1	0	0	0	0	0	0	1	0
Vti1b	1855688	12	80257009	80273654	2	1	0	1	2	0	0	0	0
Clmn	2136957	12	106001324	106103286	2	0	0	1	0	1	1	1	1
Eml1	1915769	12	109609167	109777827	1	1	1	1	1	0	0	0	0
Slc25a47	2144766	12	110089339	110095025	1	0	0	0	0	0	0	1	1
Dlk1	94900	12	110691059	110698901	2	0	0	0	0	2	0	0	0
Wdr60	2445085	12	117445523	117501498	1	0	0	0	0	0	0	1	0
Rapgef5	2444365	12	118754952	118995118	1	1	0	0	1	0	0	0	0
Gtpbp4	1916487	13	8971710	8995258	1	1	0	1	1	0	0	0	0
Zmynd11	1913755	13	9684082	9764567	1	1	0	0	0	0	0	0	0
Agtr1a	87964	13	30428310	30474736	1	0	0	0	0	0	0	1	0
Riok1	1918590	13	38129164	38153298	1	1	0	0	0	0	0	0	0
Tmem14c	1913404	13	41111673	41117950	2	0	0	0	0	1	0	2	0
Edn1	95283	13	42396845	42403358	1	1	0	1	0	0	0	0	0
Mef2c	99458	13	83643194	83802927	1	0	1	0	1	0	0	0	0
F2r	101802	13	96371744	96388388	1	0	0	0	0	1	1	1	1
Ankra2	1915808	13	99033113	99044705	1	0	0	0	0	0	0	1	1
Mrps27	1919064	13	100114745	100185517	1	0	0	0	0	1	1	1	1
Cartpt	1351330	13	100668439	100670638	1	0	0	0	0	0	1	0	0
Pde4d	99555	13	109240142	110743669	3	2	1	1	2	0	0	0	0
Rpp14	1914303	14	8912881	8924350	1	0	0	0	0	1	0	1	1
Fezf2	1859823	14	13174616	13178342	1	1	0	0	0	0	0	0	0
Rpl15	1913730	14	19100337	19103905	1	1	0	1	1	0	0	0	0
Mipep	1917728	14	61403425	61522447	1	0	0	0	0	1	1	1	1
Ctsb	88561	14	63741353	63761971	1	0	0	0	0	1	1	1	1
Mtmr9	2442842	14	64142447	64162790	1	0	1	1	1	0	0	0	0
Pdlim2	2384850	14	70564025	70577488	1	0	0	1	0	0	0	0	0
Dgkh	2444188	14	78969416	79124896	1	1	0	1	1	0	0	0	0
1300010F03Rik	1919008	14	79248991	79602117	1	1	0	1	1	0	0	0	0
Naa16	1914147	14	79734317	79790475	1	1	1	1	1	0	0	0	0
Dct	102563	14	118412029	118451407	1	0	0	0	0	0	0	0	1
Nipbl	1913976	15	8241225	8394463	1	0	0	0	0	1	1	1	1
Rai14	1922896	15	10498734	10643295	1	0	0	0	1	0	0	0	0
Spag1	1349387	15	36109123	36165365	1	0	0	0	0	1	0	1	1
Ubr5	1918040	15	37897083	37978898	1	0	0	0	0	1	0	0	1
Tg	98733	15	66502332	66682275	1	0	0	0	1	0	0	0	0
Sla	104295	15	66612434	66644284	1	0	0	0	1	0	0	0	0
Rbm9	1933973	15	76912769	77137035	1	1	0	0	0	0	0	0	0
Myh9	107717	15	77591017	77672605	1	0	0	0	0	1	0	1	1
Foxred2	106315	15	77770952	77787152	1	0	0	1	1	0	0	0	0
Card10	2146012	15	78605570	78633472	1	0	0	0	0	1	0	1	0
Slc25a17	1342248	15	81149351	81191195	1	0	0	0	0	0	0	1	1
Alg1	2384774	16	5233714	5245005	1	0	1	1	1	0	0	0	0
Fam86	1917761	16	5244245	5256076	1	0	1	1	1	0	0	0	0
Scarf2	1858430	16	17797408	17808385	1	1	0	0	0	0	0	0	0
Dgkg	105060	16	22468534	22657294	1	1	0	0	0	0	0	0	0
4930455C21Rik	1922139	16	38498429	38522747	1	0	0	0	0	0	0	1	0
Cxadr	1201679	16	78301741	78360030	1	1	1	1	1	0	0	0	0
Wtap	1926395	17	13159662	13185412	1	1	1	1	1	0	0	0	0
Ncrna00085	1922452	17	17967683	17979973	1	0	1	0	1	0	0	0	0
Fpr2	1278319	17	18024788	18030916	1	1	0	1	1	0	0	0	0
Fpr3	1194495	17	18024816	18108641	1	1	0	1	1	0	0	0	0
6330416L07Rik	2442394	17	22474961	22498355	1	0	0	0	0	1	1	1	1
Zfp40	99185	17	23310836	23330219	1	0	0	0	0	0	0	1	0
Zfp213	3053094	17	23693737	23701096	1	0	0	0	0	0	0	1	0
Slc9a3r2	1890662	17	24776233	24787223	1	0	0	0	0	1	0	0	0
Rps2	105110	17	24855061	24858874	1	1	1	1	1	0	0	0	0
Telo2	1918968	17	25236515	25252912	1	0	0	0	0	1	1	1	1
Unkl	1921404	17	25325342	25371388	1	0	0	0	0	1	0	0	0
Gnptg	2147006	17	25371262	25377061	1	0	0	0	0	1	0	0	0
Ube2i	107365	17	25397456	25410336	2	1	0	1	1	1	0	1	1
4930539E08Rik	1925441	17	29033342	29052269	1	0	0	0	0	0	0	1	0
Fgd2	1347084	17	29497859	29516605	1	0	0	0	0	1	0	1	1
Glo1	95742	17	30729806	30749539	1	0	0	0	0	1	0	1	1
Zfp871	1921793	17	32910210	32924492	1	0	0	0	0	1	0	1	1
Cyp4f14	1927669	17	33042016	33054023	1	0	0	0	0	1	0	1	0
Angptl4	1888999	17	33911845	33918451	1	0	0	0	0	1	0	0	0
Vars2	1916165	17	35793335	35804537	1	0	0	0	0	1	1	1	1
Ddr1	99216	17	35818512	35841566	1	1	0	1	1	0	0	0	0
H2-T23	95957	17	36166921	36169646	3	3	3	3	3	0	0	0	0
H2-T22	95956	17	36175352	36179692	2	2	2	2	2	0	0	0	0
H2-T9	95965	17	36175352	36179692	2	2	2	2	2	0	0	0	0
Enpp5	1933830	17	44215762	44223516	1	0	0	0	0	1	1	1	1
Slc35b2	1921086	17	45701101	45704618	2	1	2	1	1	0	0	0	0
Hsp90ab1	96247	17	45704724	45710220	1	0	0	0	0	1	0	1	1
Rsph9	1922814	17	46258984	46281165	1	0	0	1	1	0	0	0	0
Mad2l1bp	1913841	17	46284338	46290453	1	0	0	0	1	0	0	0	0
Gtpbp2	1860138	17	46298020	46306316	1	0	0	0	1	0	0	0	0
Abcc10	2386976	17	46440182	46464972	1	0	0	0	0	0	0	0	1
Ttbk1	2147036	17	46579373	46624947	1	1	1	1	1	0	0	0	0
Cnpy3	1919279	17	46872654	46889163	1	0	0	0	0	1	0	1	0
Tomm6	1913369	17	47823595	47825335	1	0	0	0	0	1	0	0	0
Prickle4	2685785	17	47823688	47831685	1	0	0	0	0	1	0	0	0
Frs3	2135965	17	47825979	47841235	1	0	0	0	0	1	0	1	1
Foxp4	1921373	17	48004082	48061594	1	0	0	0	0	1	0	1	0
Satb1	105084	17	51875512	51972615	1	1	1	1	1	0	0	0	0
C030034I22Rik	1924783	17	69766801	69768271	1	1	1	1	1	0	0	0	0
Alk	103305	17	72218328	72953049	1	0	0	0	0	1	0	1	0
Ehd3	1928900	17	74154181	74181433	1	0	0	0	1	0	0	0	0
Slc30a6	2386741	17	74794972	74823569	1	1	1	1	1	0	0	0	0
Ttc27	1921446	17	75117090	75262909	1	0	0	0	0	1	1	1	1
Hnrpll	1919942	17	80429683	80461608	1	0	0	0	0	0	0	1	0
Morn2	2674071	17	80689572	80696813	1	1	0	1	0	0	0	0	0
Map4k3	2154405	17	80979852	81127433	1	1	1	1	1	0	0	0	0
2610044O15Rik	1919389	17	95159284	95164201	1	0	0	0	0	1	1	1	1
A730017C20Rik	2442934	18	59221902	59236616	2	0	0	0	0	2	0	1	0
Hmgxb3	2441817	18	61290933	61336704	2	1	0	0	0	1	0	1	1
Il17b	1928397	18	61847589	61852191	1	0	0	0	0	1	0	1	0
Elac1	1890495	18	73894692	73914133	1	1	1	1	1	0	0	0	0
Me2	2147351	18	73929694	73975046	1	0	0	0	0	1	0	1	0
Stx3	103077	19	11849609	11893893	1	1	1	1	1	0	0	0	0
Gnaq	95776	19	16207321	16461943	1	1	1	1	1	0	0	0	0
Cbwd1	2385089	19	24994923	25036021	1	1	0	1	1	0	0	0	0
Il33	1924375	19	29999604	30035194	1	0	0	0	0	0	0	1	0
Opalin	2657025	19	41137910	41151603	1	0	0	1	0	0	0	0	0
Marveld1	2147570	19	42221879	42224737	1	0	0	0	0	0	0	1	1
Cwf19l1	1919752	19	44183134	44210366	1	0	0	0	1	0	0	0	0
Ccdc147	2685815	19	48012202	48109868	1	0	0	0	0	1	0	1	0
Sorcs1	1929666	19	50225463	50752975	1	0	0	0	0	1	0	0	1
Add3	1351615	19	53277904	53321577	1	1	0	1	1	0	0	0	0
Atrnl1	2147749	19	57685535	58207833	1	1	0	0	0	0	0	0	0
Nanos1	2669254	19	60831890	60835816	1	0	0	0	0	0	0	1	0
Dgkk	3580254	X	6450610	6525489	1	0	0	0	0	1	0	0	0
Chic1	1344694	X	100551815	100591431	1	0	0	1	0	0	0	0	0
Sytl4	1351606	X	130470924	130516351	1	0	0	0	0	1	0	1	0
Mcart6	1914312	X	133515655	133572841	1	0	0	0	0	0	0	1	0
