# Supplementary material for: Connecting Anxiety and Genomic Copy Number Variation: A Genome-Wide Analysis in CD-1 Mice
Source: PLoS One. 2015 May 26;10(5):e0128465. doi: 10.1371/journal.pone.0128465 (PMC4444327; doi:10.1371/journal.pone.0128465)
Supplement: S8 Table — Genes in regions of CNVs detected in HAB/LAB mice by (a) aCGH, (b) JaxMDGA and (c) NGS, respectively, are listed and the position information of genes and correspondent CNVs are shown. Genes are listed multiple times if overlapping with more than one CNV. In (d) those genes overlapping CNVs detected in HAB/LAB mice by all of the three detection methods are displayed. (e) Genes in genomic regions of CNVs detected in 64 CD-1 mice by JaxMDGA are listed and the position information of genes and correspondent CNVs are shown. (f) Reduction of table (e) to those genes overlapping CNVs that could be best associated with the time the animals spent on the open arm of the EPM (nominal p-values < 0.1, or < 0.05). (XLS) [file pone.0128465.s014.xls]

## Sheet: a)
Gene					CNV (aCGH)
Symbol	MGI.ID	Chr	start	end	Chr	Start	End
C130026I21Rik	MGI:3612702	1	84989265	85267141	1	85068489	87505075
A530032D15Rik	MGI:3037746	1	85084714	85106428	1	85068489	87505075
A530040E14Rik	MGI:3612703	1	85102521	85110610	1	85068489	87505075
Gm2397	MGI:3780565	1	85107922	85115098	1	85068489	87505075
Gm11120	MGI:3779373	1	85256405	85257589	1	85068489	87505075
Gm2619	MGI:3780787	1	85310071	85323971	1	85068489	87505075
Gm2666	MGI:3780835	1	87380827	87381717	1	85068489	87505075
Gm2427	MGI:3780593	1	87386276	87411814	1	85068489	87505075
Gm7592	MGI:3644077	1	87423175	87465775	1	85068489	87505075
Sp110	MGI:1923364	1	87473474	87495392	1	85068489	87505075
Sp140	MGI:3702467	1	87496953	87541612	1	85068489	87505075
Gm10552	MGI:3642083	1	87500660	87547257	1	85068489	87505075
Gm9931	MGI:3642402	1	149128702	149129037	1	148961518	151058888
BC003331	MGI:2385108	1	152208435	152240210	1	152191453	154189680
Tpr	MGI:1922066	1	152239968	152297062	1	152191453	154189680
Prg4	MGI:1891344	1	152296946	152313295	1	152191453	154189680
Hmcn1	MGI:2685047	1	152409654	152840565	1	152191453	154189680
Gm9690	MGI:3780098	1	153029696	153031375	1	152191453	154189680
Gm8947	MGI:3648958	1	153039504	153041184	1	152191453	154189680
Gm8951	MGI:3779826	1	153045534	153047211	1	152191453	154189680
3110040M04Rik	MGI:1920426	1	153051249	153052926	1	152191453	154189680
Gm4337	MGI:3782521	1	153057256	153058933	1	152191453	154189680
Ivns1abp	MGI:2152389	1	153191628	153211575	1	152191453	154189680
1200016B10Rik	MGI:1914125	1	153214829	153275585	1	152191453	154189680
1190005F20Rik	MGI:1916185	1	153275778	153305289	1	152191453	154189680
Rnf2	MGI:1101759	1	153316657	153347933	1	152191453	154189680
Fam129a	MGI:2137237	1	153418316	153569069	1	152191453	154189680
Edem3	MGI:1914217	1	153602504	153669181	1	152191453	154189680
1700025G04Rik	MGI:1916649	1	153737978	153853897	1	152191453	154189680
E330020D12Rik	MGI:3761270	1	155251957	155255559	1	155192808	156075508
1700012A16Rik	MGI:1919086	1	155272292	155299704	1	155192808	156075508
Dhx9	MGI:108177	1	155302943	155334738	1	155192808	156075508
Npl	MGI:1921341	1	155350146	155396844	1	155192808	156075508
Rgs8	MGI:108408	1	155500155	155544797	1	155192808	156075508
Rgs16	MGI:108407	1	155587479	155592598	1	155192808	156075508
Rnasel	MGI:1098272	1	155600061	155609471	1	155192808	156075508
5830403L16Rik	MGI:1923273	1	155696672	155747338	1	155192808	156075508
Gm5531	MGI:3646829	1	155721475	155724001	1	155192808	156075508
Teddm1	MGI:2668439	1	155738922	155740188	1	155192808	156075508
Glul	MGI:95739	1	155747074	155756853	1	155192808	156075508
Gm11074	MGI:3779301	1	155752801	155764441	1	155192808	156075508
Gm4387	MGI:3782572	1	155874493	155881431	1	155192808	156075508
Zfp648	MGI:2685049	1	156051227	156052804	1	155192808	156075508
Cacnb2	MGI:894644	2	14525933	14909535	2	14767424	15852084
Nsun6	MGI:1921705	2	14916758	14976511	2	14767424	15852084
Arl5b	MGI:1923119	2	14971022	15004083	2	14767424	15852084
Gm1631	MGI:2686477	2	71557446	71569023	2	71567613	72077804
Itga6	MGI:96605	2	71583673	71696473	2	71567613	72077804
Pdk1	MGI:1926119	2	71711281	71741915	2	71567613	72077804
Rapgef4	MGI:1917723	2	71819297	72095531	2	71567613	72077804
Gm13634	MGI:3649714	2	71935660	71986853	2	71567613	72077804
A530006G24Rik	MGI:2685849	2	147536429	147543368	2	147448370	147617209
a	MGI:87853	2	154617138	154876748	2	154730931	155890110
Gm14226	MGI:3649244	2	154844002	154852840	2	154730931	155890110
Ahcy	MGI:87968	2	154885046	154900233	2	154730931	155890110
Itch	MGI:1202301	2	154959245	155052591	2	154730931	155890110
Dynlrb1	MGI:1914318	2	155062269	155076013	2	154730931	155890110
Map1lc3a	MGI:1915661	2	155102033	155103809	2	154730931	155890110
Pigu	MGI:3039607	2	155103979	155183166	2	154730931	155890110
Trp53inp2	MGI:1915978	2	155206795	155215586	2	154730931	155890110
Ncoa6	MGI:1929915	2	155216401	155299630	2	154730931	155890110
Ggt7	MGI:1913385	2	155316115	155343973	2	154730931	155890110
Acss2	MGI:1890410	2	155343684	155411460	2	154730931	155890110
Gss	MGI:95852	2	155388917	155418546	2	154730931	155890110
Myh7b	MGI:3710243	2	155436948	155460043	2	154730931	155890110
Trpc4ap	MGI:1930751	2	155460007	155518120	2	154730931	155890110
Edem2	MGI:1915540	2	155527413	155555211	2	154730931	155890110
Procr	MGI:104596	2	155576853	155581207	2	154730931	155890110
Mmp24	MGI:1341867	2	155601078	155644102	2	154730931	155890110
BC029722	MGI:3584273	2	155643466	155645162	2	154730931	155890110
Eif6	MGI:1196288	2	155645568	155652661	2	154730931	155890110
Fam83c	MGI:1918655	2	155653284	155660590	2	154730931	155890110
Uqcc	MGI:1929472	2	155672630	155756046	2	154730931	155890110
Gm15557	MGI:3783006	2	155766464	155768486	2	154730931	155890110
Gdf5	MGI:95688	2	155766759	155771103	2	154730931	155890110
Cep250	MGI:108084	2	155782194	155824636	2	154730931	155890110
6430550D23Rik	MGI:2443361	2	155799015	155833713	2	154730931	155890110
Ergic3	MGI:1913616	2	155833781	155844015	2	154730931	155890110
Fer1l4	MGI:1921812	2	155844875	155878683	2	154730931	155890110
Ndrg3	MGI:1352499	2	156753081	156817792	2	156737595	159424407
Dsn1	MGI:1914184	2	156821001	156832890	2	156737595	159424407
9830001H06Rik	MGI:2444575	2	156841535	156904990	2	156737595	159424407
Gm1332	MGI:2686178	2	156914189	156922218	2	156737595	159424407
Samhd1	MGI:1927468	2	156923269	156961001	2	156737595	159424407
Rbl1	MGI:103300	2	156971629	157030270	2	156737595	159424407
2610301H18Rik	MGI:1919739	2	157030040	157032550	2	156737595	159424407
4922505G16Rik	MGI:3603828	2	157034286	157105285	2	156737595	159424407
Rpn2	MGI:98085	2	157104753	157152055	2	156737595	159424407
Ghrh	MGI:95709	2	157155233	157173242	2	156737595	159424407
Manbal	MGI:1916411	2	157193330	157222499	2	156737595	159424407
Gm4584	MGI:3782767	2	157193333	157194339	2	156737595	159424407
Src	MGI:98397	2	157244180	157297598	2	156737595	159424407
Blcap	MGI:1858907	2	157382098	157392097	2	156737595	159424407
Nnat	MGI:104716	2	157385846	157388258	2	156737595	159424407
Ctnnbl1	MGI:1913892	2	157563137	157717350	2	156737595	159424407
Vstm2l	MGI:2685537	2	157740389	157770455	2	156737595	159424407
Tti1	MGI:1922675	2	157807539	157854169	2	156737595	159424407
Rprd1b	MGI:1917720	2	157854233	157958033	2	156737595	159424407
Tgm2	MGI:98731	2	157942138	157972172	2	156737595	159424407
D630003M21Rik	MGI:3606579	2	158008269	158054958	2	156737595	159424407
1700060C20Rik	MGI:1920649	2	158017745	158021478	2	156737595	159424407
Bpi	MGI:3045315	2	158083830	158110267	2	156737595	159424407
Lbp	MGI:1098776	2	158132229	158158588	2	156737595	159424407
9430008C03Rik	MGI:1915358	2	158181043	158187316	2	156737595	159424407
Snhg11	MGI:2441845	2	158201374	158211881	2	156737595	159424407
Ralgapb	MGI:2444531	2	158235584	158324989	2	156737595	159424407
Adig	MGI:2675492	2	158328348	158333934	2	156737595	159424407
Arhgap40	MGI:3649852	2	158338532	158376498	2	156737595	159424407
Slc32a1	MGI:1194488	2	158436503	158441484	2	156737595	159424407
Actr5	MGI:1924748	2	158450624	158464947	2	156737595	159424407
Ppp1r16b	MGI:2151841	2	158491134	158592070	2	156737595	159424407
Fam83d	MGI:1919128	2	158593829	158612373	2	156737595	159424407
Dhx35	MGI:1918965	2	158620543	158683950	2	156737595	159424407
Gm4713	MGI:3782893	2	158682832	158683965	2	156737595	159424407
Sirpb1a	MGI:2444824	3	15371819	15426504	3	15339647	15767115
Sirpb1b	MGI:3779828	3	15495754	15575065	3	15339647	15767115
Sirpb1c	MGI:3807521	3	15695145	15748528	3	15339647	15767115
Gm6639	MGI:3779620	3	35518546	35565048	3	34703578	35619447
Dclk2	MGI:1918012	3	86590081	86724774	3	86721045	87488250
Cd1d2	MGI:107675	3	86790508	86793455	3	86721045	87488250
Cd1d1	MGI:107674	3	86799756	86803363	3	86721045	87488250
Kirrel	MGI:1891396	3	86882515	86978622	3	86721045	87488250
Fcrls	MGI:1933397	3	87054680	87067660	3	86721045	87488250
Cd5l	MGI:1334419	3	87161897	87174995	3	86721045	87488250
Fcrl1	MGI:2442862	3	87180370	87196055	3	86721045	87488250
Fcrl5	MGI:3053558	3	87239704	87271446	3	86721045	87488250
Etv3	MGI:1350926	3	87329329	87344078	3	86721045	87488250
Arhgef11	MGI:2441869	3	87421481	87541956	3	86721045	87488250
Gm6570	MGI:3644100	3	87483496	87484000	3	86721045	87488250
Gm9418	MGI:3646900	3	143239578	143252134	3	143018945	143917151
Gm6260	MGI:3645891	3	143333854	143375107	3	143018945	143917151
Gm2514	MGI:3780681	3	143767461	143795994	3	143018945	143917151
Lmo4	MGI:109360	3	143851494	143868184	3	143018945	143917151
Gm6391	MGI:3779590	4	41752437	41754670	4	41733843	42748212
Ccl21b	MGI:1349182	4	41774204	41775337	4	41733843	42748212
Gm13308	MGI:3650431	4	41812314	41813866	4	41733843	42748212
Gm13298	MGI:3701946	4	41836784	41842582	4	41733843	42748212
Gm10598	MGI:3711244	4	41902019	41906852	4	41733843	42748212
Gm10597	MGI:3641628	4	41905836	41906261	4	41733843	42748212
Gm2438	MGI:3780605	4	41924280	41938942	4	41733843	42748212
Gm3892	MGI:3782065	4	41925875	41960431	4	41733843	42748212
Gm2442	MGI:3780609	4	41941854	41943487	4	41733843	42748212
Gm10596	MGI:3836443	4	41954622	41955014	4	41733843	42748212
Gm3893	MGI:3782066	4	41961930	41963010	4	41733843	42748212
Gm13304	MGI:3710514	4	41985540	41986640	4	41733843	42748212
Gm13306	MGI:3713752	4	42024159	42029562	4	41733843	42748212
Gm13305	MGI:3801997	4	42029565	42039326	4	41733843	42748212
1700045I11Rik	MGI:1920600	4	42041568	42042058	4	41733843	42748212
Gm2478	MGI:3780645	4	42087631	42090601	4	41733843	42748212
Gm10595	MGI:3641751	4	42090151	42090576	4	41733843	42748212
Gm10931	MGI:3779142	4	42215271	42215822	4	41733843	42748212
Gm1987	MGI:3780156	4	42231044	42232175	4	41733843	42748212
Gm2023	MGI:3780192	4	42248431	42250498	4	41733843	42748212
Gm2091	MGI:3780258	4	42269495	42271067	4	41733843	42748212
Gm10930	MGI:3779141	4	42289139	42289564	4	41733843	42748212
Gm2500	MGI:3780667	4	42336584	42336979	4	41733843	42748212
Gm2002	MGI:3780172	4	42339260	42349021	4	41733843	42748212
Gm2506	MGI:3780673	4	42349029	42354382	4	41733843	42748212
Ccl21c	MGI:1891386	4	42391950	42393080	4	41733843	42748212
Gm10929	MGI:3779140	4	42423572	42424498	4	41733843	42748212
Gm2537	MGI:3780705	4	42439644	42454306	4	41733843	42748212
Gm10594	MGI:3641750	4	42472325	42472750	4	41733843	42748212
Gm2542	MGI:3780710	4	42536112	42541707	4	41733843	42748212
Gm6389	MGI:3643815	4	42564415	42579081	4	41733843	42748212
Gm10593	MGI:3710526	4	42566010	42600570	4	41733843	42748212
Gm10592	MGI:3704230	4	42594761	42595153	4	41733843	42748212
Gm2163	MGI:3780332	4	42602069	42603149	4	41733843	42748212
Gm10591	MGI:3711256	4	42625653	42626784	4	41733843	42748212
Gm2564	MGI:3708691	4	42643230	42645246	4	41733843	42748212
Ccl27b	MGI:1891389	4	42664172	42669525	4	41733843	42748212
Il11ra2	MGI:109123	4	42669533	42679294	4	41733843	42748212
Gm9969	MGI:3710519	4	42681536	42682026	4	41733843	42748212
Gm10590	MGI:3641654	4	42728990	42729415	4	41733843	42748212
Skint4	MGI:2444425	4	111744621	111840681	4	111737341	114000805
Skint3	MGI:3045331	4	111904850	111973073	4	111737341	114000805
Skint9	MGI:3045341	4	112058574	112106590	4	111737341	114000805
Skint2	MGI:3649629	4	112286202	112320445	4	111737341	114000805
Skint10	MGI:2685416	4	112383752	112447471	4	111737341	114000805
Skint6	MGI:3649262	4	112908844	112959568	4	111737341	114000805
Skint5	MGI:3650151	4	113613249	113672102	4	111737341	114000805
Skint11	MGI:2685415	4	113835989	113917633	4	111737341	114000805
Rundc3b	MGI:2685286	5	8490334	8622952	5	8598466	10757049
Abcb1a	MGI:97570	5	8660077	8748575	5	8598466	10757049
Abcb1b	MGI:97568	5	8798186	8866308	5	8598466	10757049
Abcb4	MGI:97569	5	8893717	8959225	5	8598466	10757049
Crot	MGI:1921364	5	8966033	8997324	5	8598466	10757049
4930420K17Rik	MGI:3606159	5	9100737	9118983	5	8598466	10757049
Dmtf1	MGI:1344415	5	9118841	9161718	5	8598466	10757049
9330182L06Rik	MGI:2443264	5	9266118	9481825	5	8598466	10757049
Grm3	MGI:1351340	5	9485236	9725352	5	8598466	10757049
Gm10482	MGI:3644444	5	10187866	10237890	5	8598466	10757049
Gm6603	MGI:3647750	5	10499117	10502405	5	8598466	10757049
Gm4047	MGI:3782222	5	11190195	11222015	5	10872011	11817489
Gm4072	MGI:3782247	5	11476315	11478494	5	10872011	11817489
Gm6460	MGI:3644247	5	11594956	11599480	5	10872011	11817489
Gm16427	MGI:3704103	5	93910849	93914418	5	93891321	95954760
C87414	MGI:2141341	5	94064019	94100577	5	93891321	95954760
Gm7792	MGI:3704104	5	94281097	94284656	5	93891321	95954760
Gm16429	MGI:3704105	5	94353803	94358078	5	93891321	95954760
Gm6346	MGI:3644199	5	94365781	94368514	5	93891321	95954760
BC061212	MGI:2681870	5	94495177	94499571	5	93891321	95954760
Gm6351	MGI:3647817	5	94505411	94510023	5	93891321	95954760
Gm3106	MGI:3781282	5	94647020	94650562	5	93891321	95954760
Gm16522	MGI:4360987	5	94731544	94735821	5	93891321	95954760
Gm6502	MGI:3779601	5	94743494	94746227	5	93891321	95954760
AA792892	MGI:2140789	5	94810361	94814104	5	93891321	95954760
Gm7682	MGI:3779756	5	94874843	94877576	5	93891321	95954760
Gm3139	MGI:3781318	5	94955309	94968473	5	93891321	95954760
Gm3147	MGI:3781326	5	95041094	95045367	5	93891321	95954760
Gm6509	MGI:3779602	5	95053038	95055771	5	93891321	95954760
Gm6523	MGI:3779604	5	95206896	95210006	5	93891321	95954760
Gm3183	MGI:3781362	5	95294521	95307501	5	93891321	95954760
Gm7942	MGI:3646599	5	95537068	95540177	5	93891321	95954760
Gm16513	MGI:2141041	5	95611623	95624586	5	93891321	95954760
Gm10424	MGI:3704250	5	95697512	95701787	5	93891321	95954760
Gm6468	MGI:3646666	5	95709481	95711989	5	93891321	95954760
Gm3259	MGI:3781437	5	95734834	95772936	5	93891321	95954760
Gm7963	MGI:3643214	5	95854546	95857656	5	93891321	95954760
D5Ertd577e	MGI:1261918	5	95885825	95914583	5	93891321	95954760
Gm3286	MGI:3781464	5	95947694	95950987	5	93891321	95954760
Zfp33b	MGI:1916873	5	105000731	105012344	5	104993270	105357266
C230055K05Rik	MGI:2441896	5	105242188	105288830	5	104993270	105357266
Gm16637	MGI:4439561	6	68581957	68582424	6	68527610	68663805
Lmo3	MGI:102810	6	138311439	138530489	6	138497967	139588152
Igbp1b	MGI:1354380	6	138605934	138606965	6	138497967	139588152
Rergl	MGI:3642998	6	139441735	139450395	6	138497967	139588152
Zfp772	MGI:2385265	7	7154833	7162709	7	7156587	10630880
Vmn2r29	MGI:1923479	7	7166473	7192861	7	7156587	10630880
Clcn4-2	MGI:104571	7	7235027	7252222	7	7156587	10630880
Vmn2r30	MGI:1316729	7	7264434	7290242	7	7156587	10630880
Gm3554	MGI:3781731	7	7312678	7315071	7	7156587	10630880
Gm3912	MGI:3782085	7	7315609	7327335	7	7156587	10630880
Vmn2r31	MGI:3757688	7	7336741	7349472	7	7156587	10630880
Vmn2r32	MGI:1316696	7	7415738	7432800	7	7156587	10630880
Vmn2r33	MGI:3757694	7	7503402	7519537	7	7156587	10630880
Vmn2r34	MGI:3757700	7	7623988	7642224	7	7156587	10630880
Vmn2r35	MGI:3646200	7	7738588	7772618	7	7156587	10630880
Vmn2r36	MGI:3757866	7	7828805	7855288	7	7156587	10630880
Gm3956	MGI:3782130	7	8062819	8089272	7	7156587	10630880
Gm3962	MGI:3782136	7	8134906	8150983	7	7156587	10630880
Gm10302	MGI:3704281	7	8246140	8271350	7	7156587	10630880
Gm3972	MGI:3782146	7	8317009	8339820	7	7156587	10630880
Gm3991	MGI:3782165	7	8557157	8583640	7	7156587	10630880
Gm3607	MGI:3781784	7	8639868	8670523	7	7156587	10630880
Vmn2r37	MGI:1316711	7	8954257	8972355	7	7156587	10630880
Gm5583	MGI:3646061	7	9046767	9061104	7	7156587	10630880
Vmn2r38	MGI:3757869	7	9079992	9103276	7	7156587	10630880
Vmn2r39	MGI:3704108	7	9147119	9163358	7	7156587	10630880
Vmn2r40	MGI:3757872	7	9246337	9270665	7	7156587	10630880
Gm3644	MGI:3781820	7	9327233	9329627	7	7156587	10630880
Gm4033	MGI:3782207	7	9422918	9438995	7	7156587	10630880
Vmn2r45	MGI:3757883	7	9638195	9656739	7	7156587	10630880
Vmn2r44	MGI:3643088	7	9744040	9760130	7	7156587	10630880
Gm7696	MGI:3649133	7	9769212	9776255	7	7156587	10630880
Gm10303	MGI:3642900	7	9774107	9820158	7	7156587	10630880
Gm3654	MGI:3781830	7	9835626	9844689	7	7156587	10630880
Vmn2r43	MGI:3037819	7	9866727	9882979	7	7156587	10630880
Vmn2r42	MGI:1316666	7	9927007	9944065	7	7156587	10630880
Vmn2r41	MGI:3757876	7	9965677	9989982	7	7156587	10630880
Gm4082	MGI:3782257	7	10034293	10041283	7	7156587	10630880
Gm3670	MGI:3781846	7	10046523	10048914	7	7156587	10630880
Gm3680	MGI:3781856	7	10162947	10223709	7	7156587	10630880
Vmn2r46	MGI:3757899	7	10333109	10355920	7	7156587	10630880
Vmn2r47	MGI:3757929	7	10401183	10426790	7	7156587	10630880
2810047C21Rik1	MGI:1919966	7	10455317	10462312	7	7156587	10630880
Vmn2r48	MGI:3647749	7	10512973	10538925	7	7156587	10630880
Vmn2r49	MGI:3757933	7	10560652	10577604	7	7156587	10630880
Vmn2r50	MGI:3643086	7	10622317	10635663	7	7156587	10630880
Gm10991	MGI:3779207	7	11494168	11494649	7	11470185	12114259
Zscan4c	MGI:2685243	7	11591071	11595896	7	11470185	12114259
Zscan4d	MGI:3645954	7	11746722	11751531	7	11470185	12114259
Zscan4e	MGI:3643613	7	11891727	11896031	7	11470185	12114259
Zscan4f	MGI:3708485	7	11983264	11988090	7	11470185	12114259
Gm3804	MGI:3781977	7	12063250	12072819	7	11470185	12114259
Gm4186	MGI:3782362	7	12194634	12199462	7	12136553	12740971
Vmn1r72	MGI:2182256	7	12254948	12255868	7	12136553	12740971
Vmn1r73	MGI:2159641	7	12341606	12342517	7	12136553	12740971
Vmn1r74	MGI:2159644	7	12432124	12433038	7	12136553	12740971
Vmn1r75	MGI:2159645	7	12465692	12466609	7	12136553	12740971
Vmn1r76	MGI:2159643	7	12515660	12516634	7	12136553	12740971
Vmn1r77	MGI:3779641	7	12626648	12627568	7	12136553	12740971
Vmn1r78	MGI:2159646	7	12737813	12738754	7	12136553	12740971
Gm8040	MGI:3647077	7	15385143	15396199	7	15263229	16224724
Gm9545	MGI:3779955	7	15550579	15572398	7	15263229	16224724
Gm3959	MGI:3782133	7	15591759	15593370	7	15263229	16224724
Gm8072	MGI:3643193	7	15641545	15643153	7	15263229	16224724
Gm3968	MGI:3782142	7	15709499	15715462	7	15263229	16224724
Gm3977	MGI:3782150	7	15724895	15726833	7	15263229	16224724
Gm3980	MGI:3782153	7	15736263	15738201	7	15263229	16224724
Gm3981	MGI:3782154	7	15747593	15749531	7	15263229	16224724
Gm3984	MGI:3782157	7	15758674	15760612	7	15263229	16224724
Gm3987	MGI:3782160	7	15770015	15771953	7	15263229	16224724
Gm3989	MGI:3782163	7	15781328	15783224	7	15263229	16224724
Gm3994	MGI:3782168	7	15792659	15794597	7	15263229	16224724
Gm3996	MGI:3782170	7	15803989	15805927	7	15263229	16224724
Gm3998	MGI:3782172	7	15815293	15817231	7	15263229	16224724
Gm4001	MGI:3782175	7	15826621	15828559	7	15263229	16224724
Gm4003	MGI:3782177	7	15837960	15839898	7	15263229	16224724
Obox2	MGI:2149033	7	15982194	15983380	7	15263229	16224724
Gm4016	MGI:3782190	7	16076788	16088118	7	15263229	16224724
Obox1	MGI:1918718	7	16132606	16142195	7	15263229	16224724
Obox3	MGI:2149032	7	16210740	16213211	7	15263229	16224724
Vmn1r107	MGI:3780017	7	21253034	21255190	7	21203259	21559010
Gm4144	MGI:3782320	7	21287648	21290505	7	21203259	21559010
Gm5156	MGI:3648210	7	21309861	21312330	7	21203259	21559010
Vmn1r109	MGI:3782702	7	21336572	21358986	7	21203259	21559010
Vmn1r110	MGI:3782704	7	21452703	21454859	7	21203259	21559010
Vmn1r111	MGI:3645811	7	21487315	21490172	7	21203259	21559010
Gm10668	MGI:3642587	7	21509544	21512013	7	21203259	21559010
Vmn1r112	MGI:3649076	7	21554842	21557259	7	21203259	21559010
Vmn1r121	MGI:3648662	7	21882495	21884610	7	21877030	23892316
Vmn1r122	MGI:3647341	7	21918230	21920358	7	21877030	23892316
Vmn1r123	MGI:2686292	7	21945268	21948127	7	21877030	23892316
Vmn1r124	MGI:3779910	7	22044713	22045636	7	21877030	23892316
Vmn1r125	MGI:3704112	7	22057198	22058121	7	21877030	23892316
Vmn1r126	MGI:3782346	7	22085521	22087648	7	21877030	23892316
Vmn1r127	MGI:3779578	7	22103963	22104880	7	21877030	23892316
Vmn1r128	MGI:3643535	7	22133033	22135478	7	21877030	23892316
Vmn1r129	MGI:3645471	7	22145387	22146310	7	21877030	23892316
Gm6882	MGI:3645601	7	22210877	22214131	7	21877030	23892316
Vmn1r130	MGI:3782726	7	22295568	22297722	7	21877030	23892316
Gm4172	MGI:3782348	7	22330189	22331109	7	21877030	23892316
Vmn1r132	MGI:3647009	7	22379150	22400150	7	21877030	23892316
Gm4175	MGI:3782351	7	22545550	22546494	7	21877030	23892316
Gm4177	MGI:3782353	7	22580830	22581747	7	21877030	23892316
Vmn1r135	MGI:3648167	7	22616009	22618456	7	21877030	23892316
Gm5725	MGI:3644396	7	22628363	22629286	7	21877030	23892316
Gm5891	MGI:3649014	7	22694453	22706310	7	21877030	23892316
Vmn1r137	MGI:3782735	7	22779606	22780529	7	21877030	23892316
Gm4179	MGI:3782355	7	22812996	22813916	7	21877030	23892316
Gm6176	MGI:3644439	7	22835224	22837694	7	21877030	23892316
Vmn1r139	MGI:3644494	7	22880539	22882941	7	21877030	23892316
Gm10666	MGI:3704285	7	22918795	22919760	7	21877030	23892316
Vmn1r142	MGI:3644264	7	22921033	22949054	7	21877030	23892316
Vmn1r143	MGI:3644289	7	22973034	22975482	7	21877030	23892316
Gm8653	MGI:3647206	7	22985360	22986283	7	21877030	23892316
Gm8453	MGI:3644807	7	23013583	23016408	7	21877030	23892316
Gm4557	MGI:3782741	7	23041055	23053029	7	21877030	23892316
Gm4187	MGI:3782363	7	23113813	23115951	7	21877030	23892316
Gm4562	MGI:3782746	7	23149347	23150697	7	21877030	23892316
Gm8660	MGI:3645692	7	23155411	23156058	7	21877030	23892316
Vmn1r148	MGI:3033483	7	23198602	23199525	7	21877030	23892316
Vmn1r149	MGI:3782370	7	23222325	23224770	7	21877030	23892316
Gm10665	MGI:3642415	7	23248129	23249094	7	21877030	23892316
Vmn1r151	MGI:3644394	7	23283780	23284697	7	21877030	23892316
Vmn1r152	MGI:3643438	7	23304677	23308909	7	21877030	23892316
Gm8677	MGI:3646576	7	23318983	23319906	7	21877030	23892316
Gm4201	MGI:3782378	7	23349442	23352258	7	21877030	23892316
Vmn1r155	MGI:3646821	7	23441804	23443960	7	21877030	23892316
Gm8693	MGI:3642968	7	23476416	23479273	7	21877030	23892316
Gm4567	MGI:3809658	7	23498630	23501099	7	21877030	23892316
Vmn1r157	MGI:3646139	7	23545352	23547771	7	21877030	23892316
Gm4569	MGI:3782752	7	23558213	23560407	7	21877030	23892316
Vmn1r158	MGI:3646143	7	23574878	23577983	7	21877030	23892316
Vmn1r159	MGI:3642763	7	23627707	23628624	7	21877030	23892316
Vmn1r160	MGI:3779564	7	23654307	23657166	7	21877030	23892316
Gm4214	MGI:3782390	7	23768748	23770864	7	21877030	23892316
Gm4216	MGI:3782392	7	23804025	23806166	7	21877030	23892316
Vmn1r163	MGI:3644349	7	23839198	23841645	7	21877030	23892316
Gm8720	MGI:3647550	7	23851552	23852475	7	21877030	23892316
Gm6605	MGI:3644762	7	39231315	39237190	7	39158079	46642089
Gm5591	MGI:3648692	7	39303158	39313212	7	39158079	46642089
Gm4454	MGI:3782638	7	39351859	39356187	7	39158079	46642089
Gm1988	MGI:3780157	7	46425170	46435208	7	39158079	46642089
Gm6124	MGI:3779556	7	46474468	46480344	7	39158079	46642089
Gm16387	MGI:3646111	7	46511994	46519904	7	39158079	46642089
Gm6833	MGI:3645553	7	46562898	46572951	7	39158079	46642089
Gm9271	MGI:3646449	7	46617645	46623502	7	39158079	46642089
Stim1	MGI:107476	7	109416338	109585374	7	109440882	110596321
Rrm1	MGI:98180	7	109590381	109617440	7	109440882	110596321
Olfr543	MGI:3030377	7	109625372	109626382	7	109440882	110596321
Olfr544	MGI:3030378	7	109632628	109633632	7	109440882	110596321
Olfr545	MGI:3030379	7	109642337	109643287	7	109440882	110596321
Olfr547	MGI:3030381	7	109683263	109684202	7	109440882	110596321
Olfr549	MGI:3030383	7	109702800	109703750	7	109440882	110596321
Trim21	MGI:106657	7	109706436	109713983	7	109440882	110596321
Olfr550	MGI:3030384	7	109727011	109727961	7	109440882	110596321
Olfr551	MGI:3030385	7	109736308	109737255	7	109440882	110596321
Olfr552	MGI:3030386	7	109752870	109753823	7	109440882	110596321
Olfr553	MGI:3030387	7	109762521	109763501	7	109440882	110596321
Olfr554	MGI:3030388	7	109788762	109789715	7	109440882	110596321
Olfr555	MGI:3030389	7	109807337	109808284	7	109440882	110596321
Olfr556	MGI:3030390	7	109818436	109819410	7	109440882	110596321
Trim68	MGI:2142077	7	109826096	109835768	7	109440882	110596321
Olfr557	MGI:3030391	7	109846754	109847722	7	109440882	110596321
Olfr558	MGI:3030392	7	109850845	109860568	7	109440882	110596321
Olfr33	MGI:109302	7	109861969	109862925	7	109440882	110596321
Olfr559	MGI:3030393	7	109872046	109873002	7	109440882	110596321
Olfr78	MGI:2157548	7	109889265	109907909	7	109440882	110596321
Olfr560	MGI:3030394	7	109901497	109902441	7	109440882	110596321
Olfr561	MGI:3030395	7	109923040	109923984	7	109440882	110596321
Olfr564	MGI:3030398	7	109951994	109952987	7	109440882	110596321
Olfr566	MGI:3030400	7	110004835	110005785	7	109440882	110596321
Olfr568	MGI:3030402	7	110025636	110026577	7	109440882	110596321
Olfr569	MGI:3030403	7	110035721	110036665	7	109440882	110596321
Olfr570	MGI:3030404	7	110048883	110049821	7	109440882	110596321
Olfr571	MGI:3030405	7	110057383	110058351	7	109440882	110596321
Olfr572	MGI:3030406	7	110076144	110077100	7	109440882	110596321
Olfr574	MGI:3030408	7	110096981	110098021	7	109440882	110596321
Olfr575	MGI:3030409	7	110103178	110104134	7	109440882	110596321
Olfr576	MGI:3030410	7	110113616	110114554	7	109440882	110596321
Olfr577	MGI:3030411	7	110121566	110122504	7	109440882	110596321
Olfr578	MGI:3030412	7	110132735	110133676	7	109440882	110596321
Olfr582	MGI:3030416	7	110189995	110190954	7	109440882	110596321
Olfr583	MGI:3030417	7	110199814	110200773	7	109440882	110596321
Olfr584	MGI:3030418	7	110234034	110234993	7	109440882	110596321
Olfr585	MGI:3030419	7	110246257	110247213	7	109440882	110596321
Olfr586	MGI:3030420	7	110270343	110271296	7	109440882	110596321
Olfr589	MGI:3030423	7	110303306	110304259	7	109440882	110596321
Olfr591	MGI:3030425	7	110321205	110322149	7	109440882	110596321
Olfr592	MGI:3030426	7	110333317	110336055	7	109440882	110596321
Olfr593	MGI:3030427	7	110360376	110361359	7	109440882	110596321
Olfr594	MGI:3030428	7	110368234	110369169	7	109440882	110596321
Dub2a	MGI:3051372	7	110398251	110401019	7	109440882	110596321
Olfr596	MGI:3030430	7	110458237	110459175	7	109440882	110596321
Olfr597	MGI:3030431	7	110468915	110469874	7	109440882	110596321
Olfr598	MGI:3030432	7	110477002	110477961	7	109440882	110596321
Olfr599	MGI:3030433	7	110486570	110487517	7	109440882	110596321
Olfr600	MGI:3030434	7	110494496	110495440	7	109440882	110596321
Olfr601	MGI:3030435	7	110506762	110507706	7	109440882	110596321
Olfr603	MGI:3030437	7	110531576	110532514	7	109440882	110596321
Usp17l5	MGI:107698	7	110563586	110568394	7	109440882	110596321
Olfr605	MGI:3030439	7	110590691	110591635	7	109440882	110596321
Olfr609	MGI:3030443	7	110640431	110641390	7	110630868	111067634
Olfr610	MGI:3030444	7	110654511	110655458	7	110630868	111067634
Olfr611	MGI:3030445	7	110665925	110666896	7	110630868	111067634
Olfr612	MGI:3030446	7	110686775	110687746	7	110630868	111067634
Olfr613	MGI:3030447	7	110698882	110704018	7	110630868	111067634
Olfr615	MGI:3030449	7	110708993	110709934	7	110630868	111067634
Olfr616	MGI:3030450	7	110712838	110713791	7	110630868	111067634
Gm3705	MGI:3781881	7	110728969	110729689	7	110630868	111067634
Olfr617	MGI:3030451	7	110732538	110733494	7	110630868	111067634
Olfr618	MGI:3030452	7	110745832	110746788	7	110630868	111067634
Olfr619	MGI:3030453	7	110752170	110753132	7	110630868	111067634
Olfr620	MGI:3030454	7	110759924	110760865	7	110630868	111067634
Olfr622	MGI:3030456	7	110787699	110788652	7	110630868	111067634
Olfr623	MGI:3030457	7	110808809	110809762	7	110630868	111067634
Olfr624	MGI:3030458	7	110818617	110819543	7	110630868	111067634
Olfr243	MGI:3030077	7	110865110	110866060	7	110630868	111067634
Olfr628	MGI:3030462	7	110880442	110881392	7	110630868	111067634
Olfr629	MGI:3030463	7	110888808	110889752	7	110630868	111067634
Olfr630	MGI:3030464	7	110903101	110904166	7	110630868	111067634
Olfr69	MGI:1341789	7	110915959	110916909	7	110630868	111067634
Olfr68	MGI:1341790	7	110925910	110926857	7	110630868	111067634
Olfr67	MGI:1341911	7	110935827	110936789	7	110630868	111067634
Hbb-b1	MGI:96021	7	110961038	110962510	7	110630868	111067634
Hbb-b2	MGI:96022	7	110975048	110976610	7	110630868	111067634
Gm5736	MGI:3645277	7	110987659	110988941	7	110630868	111067634
Hbb-bh1	MGI:96024	7	110990150	110991678	7	110630868	111067634
Hbb-y	MGI:96027	7	111000259	111001754	7	110630868	111067634
Olfr66	MGI:1341906	7	111029820	111030755	7	110630868	111067634
Olfr64	MGI:1341900	7	111041324	111042247	7	110630868	111067634
Olfr65	MGI:1341910	7	111054955	111055902	7	110630868	111067634
Olfr635	MGI:3030469	7	111127690	111128655	7	111108434	111569665
Olfr638	MGI:3030472	7	111151773	111152738	7	111108434	111569665
Olfr639	MGI:3030473	7	111160264	111161214	7	111108434	111569665
Olfr640	MGI:3030474	7	111169886	111170830	7	111108434	111569665
Olfr641	MGI:3030475	7	111188312	111189250	7	111108434	111569665
Olfr642	MGI:3030476	7	111197922	111198866	7	111108434	111569665
Olfr643	MGI:3030477	7	111207170	111208114	7	111108434	111569665
Olfr644	MGI:3030478	7	111216599	111217543	7	111108434	111569665
Olfr645	MGI:3030479	7	111232645	111233592	7	111108434	111569665
Olfr646	MGI:3030480	7	111254795	111255733	7	111108434	111569665
4931431F19Rik	MGI:1918230	7	111276426	111278340	7	111108434	111569665
Ubqln3	MGI:3045291	7	111289137	111291793	7	111108434	111569665
Ubqlnl	MGI:2685336	7	111296773	111299070	7	111108434	111569665
E030002O03Rik	MGI:2443346	7	111301527	111313345	7	111108434	111569665
Olfr648	MGI:3030482	7	111327970	111328920	7	111108434	111569665
Olfr649	MGI:3030483	7	111337780	111344474	7	111108434	111569665
Trim6	MGI:2137352	7	111367307	111383666	7	111108434	111569665
Trim34-1	MGI:2137359	7	111392973	111489207	7	111108434	111569665
Trim5	MGI:3646853	7	111411900	111436608	7	111108434	111569665
Trim12	MGI:1923931	7	111448408	111463980	7	111108434	111569665
Gm15134	MGI:3805550	7	111448744	111485423	7	111108434	111569665
Trim12-2	MGI:4821183	7	111487268	111501876	7	111108434	111569665
Trim30-1	MGI:4821256	7	111503896	111518398	7	111108434	111569665
Trim30-2	MGI:4821257	7	111530579	111539100	7	111108434	111569665
Trim30	MGI:98178	7	111557539	111613707	7	111108434	111569665
Trim79	MGI:3035181	7	111618528	111656363	7	111647856	111694099
Olfr653	MGI:3030487	7	111728138	111729183	7	111718611	113503675
Olfr654	MGI:3030488	7	111736269	111737294	7	111718611	113503675
Olfr655	MGI:3030489	7	111744767	111745693	7	111718611	113503675
Olfr656	MGI:3030490	7	111766171	111767161	7	111718611	113503675
Olfr657	MGI:3030491	7	111784190	111785150	7	111718611	113503675
Olfr658	MGI:3030492	7	111791394	111795819	7	111718611	113503675
Olfr659	MGI:3030493	7	111819218	111820186	7	111718611	113503675
Olfr661	MGI:3030495	7	111836531	111837490	7	111718611	113503675
Olfr663	MGI:3030497	7	111852083	111853041	7	111718611	113503675
Olfr664	MGI:3030498	7	111881956	111882876	7	111718611	113503675
Dub3	MGI:107697	7	111916674	111921467	7	111718611	113503675
Gm3930	MGI:3782104	7	111933768	111937282	7	111718611	113503675
Dub1a	MGI:3051498	7	111988826	111991018	7	111718611	113503675
Dub1	MGI:107699	7	112005523	112011181	7	111718611	113503675
Olfr665	MGI:3030499	7	112029223	112030173	7	111718611	113503675
Olfr666	MGI:3030500	7	112041184	112042140	7	111718611	113503675
Olfr667	MGI:3030501	7	112064828	112065808	7	111718611	113503675
Olfr668	MGI:3030502	7	112073320	112074276	7	111718611	113503675
Olfr669	MGI:3030503	7	112087042	112087995	7	111718611	113503675
Gm10962	MGI:3779173	7	112099258	112100793	7	111718611	113503675
Olfr670	MGI:3030504	7	112108306	112109244	7	111718611	113503675
Olfr671	MGI:3030505	7	112123556	112124497	7	111718611	113503675
Olfr672	MGI:3030506	7	112144478	112145416	7	111718611	113503675
Olfr675	MGI:3030509	7	112172539	112173480	7	111718611	113503675
Olfr676	MGI:3030510	7	112183714	112184667	7	111718611	113503675
Olfr677	MGI:3030511	7	112204762	112205700	7	111718611	113503675
Olfr678	MGI:3030512	7	112217983	112218924	7	111718611	113503675
Olfr679	MGI:3030513	7	112234232	112235179	7	111718611	113503675
Olfr681	MGI:3030515	7	112269973	112270920	7	111718611	113503675
Olfr683	MGI:3030517	7	112291864	112292823	7	111718611	113503675
Olfr684	MGI:3030518	7	112305256	112306194	7	111718611	113503675
Olfr685	MGI:3030519	7	112328875	112329825	7	111718611	113503675
Olfr686	MGI:3030520	7	112351902	112352855	7	111718611	113503675
Olfr687	MGI:3030521	7	112424010	112424975	7	111718611	113503675
Olfr688	MGI:3030522	7	112436609	112437574	7	111718611	113503675
Olfr689	MGI:3030523	7	112462520	112463482	7	111718611	113503675
Olfr690	MGI:3030524	7	112477757	112478719	7	111718611	113503675
Olfr691	MGI:3030525	7	112485260	112486228	7	111718611	113503675
Olfr692	MGI:3030526	7	112516842	112517831	7	111718611	113503675
Gm5901	MGI:3643909	7	112523612	112526801	7	111718611	113503675
Fam160a2	MGI:1921599	7	112527124	112548568	7	111718611	113503675
Cnga4	MGI:2664099	7	112553082	112557252	7	111718611	113503675
Cckbr	MGI:99479	7	112574334	112584852	7	111718611	113503675
Prkcdbp	MGI:1923422	7	112629130	112630711	7	111718611	113503675
Smpd1	MGI:98325	7	112702939	112706901	7	111718611	113503675
Apbb1	MGI:107765	7	112707000	112729735	7	111718611	113503675
Hpx	MGI:105112	7	112740125	112748610	7	111718611	113503675
Trim3	MGI:1860040	7	112752977	112782085	7	111718611	113503675
Arfip2	MGI:1924182	7	112782717	112788930	7	111718611	113503675
Fxc1	MGI:1315196	7	112788570	112804262	7	111718611	113503675
Dnhd1	MGI:1924755	7	112789076	112843322	7	111718611	113503675
Gm9571	MGI:3779981	7	112861819	112870313	7	111718611	113503675
Rrp8	MGI:1914251	7	112880721	112885890	7	111718611	113503675
Ilk	MGI:1195267	7	112885106	112891439	7	111718611	113503675
Taf10	MGI:1346320	7	112887907	112892875	7	111718611	113503675
Tpp1	MGI:1336194	7	112893532	112900743	7	111718611	113503675
Dchs1	MGI:2685011	7	112901504	112936168	7	111718611	113503675
Mrpl17	MGI:1351608	7	112955172	112959613	7	111718611	113503675
Gm4070	MGI:3782245	7	113043632	113102484	7	111718611	113503675
Gvin1	MGI:1921808	7	113300049	113358854	7	111718611	113503675
Gm9572	MGI:3779982	7	113329255	113330833	7	111718611	113503675
Ppfibp2	MGI:894649	7	114738780	114888399	7	114785938	117809632
Cyb5r2	MGI:2444415	7	114891969	114901510	7	114785938	117809632
Ovch2	MGI:3045251	7	114925058	114944722	7	114785938	117809632
Olfr467	MGI:3030301	7	114958100	114959020	7	114785938	117809632
Olfr469	MGI:3030303	7	114966037	114966981	7	114785938	117809632
Olfr470	MGI:3030304	7	114988301	114989245	7	114785938	117809632
Olfr471	MGI:3030305	7	115004566	115005492	7	114785938	117809632
Olfr472	MGI:3030306	7	115046233	115047165	7	114785938	117809632
Olfr473	MGI:3030307	7	115077036	115077968	7	114785938	117809632
Olfr474	MGI:3030308	7	115098157	115099089	7	114785938	117809632
Olfr476	MGI:3030310	7	115110913	115111845	7	114785938	117809632
Olfr477	MGI:3030311	7	115133881	115134813	7	114785938	117809632
Olfr478	MGI:3030312	7	115174911	115175855	7	114785938	117809632
Olfr479	MGI:3030313	7	115198498	115199481	7	114785938	117809632
Olfr480	MGI:3030314	7	115209282	115210310	7	114785938	117809632
Olfr481	MGI:3030315	7	115224310	115225248	7	114785938	117809632
Gm4199	MGI:3782376	7	115236698	115238099	7	114785938	117809632
Olfr482	MGI:3030316	7	115238111	115239082	7	114785938	117809632
Olfr483	MGI:3030317	7	115246825	115247772	7	114785938	117809632
Olfr484	MGI:3030318	7	115267810	115268775	7	114785938	117809632
Olfr485	MGI:3030319	7	115302432	115303375	7	114785938	117809632
Olfr486	MGI:3030320	7	115315312	115316256	7	114785938	117809632
Olfr487	MGI:3030321	7	115355097	115356041	7	114785938	117809632
Olfr488	MGI:3030322	7	115398706	115399650	7	114785938	117809632
Olfr490	MGI:3030324	7	115429694	115430638	7	114785938	117809632
Olfr491	MGI:3030325	7	115460410	115461342	7	114785938	117809632
Olfr492	MGI:3030326	7	115466244	115467188	7	114785938	117809632
Olfr493	MGI:3030327	7	115489549	115490493	7	114785938	117809632
Olfr494	MGI:3030328	7	115511006	115511950	7	114785938	117809632
Olfr495	MGI:3030329	7	115538636	115539628	7	114785938	117809632
Olfr497	MGI:3030331	7	115566087	115567031	7	114785938	117809632
Olfr498	MGI:3030332	7	115608840	115609832	7	114785938	117809632
Olfr502	MGI:3030336	7	115666518	115667462	7	114785938	117809632
Olfr503	MGI:3030337	7	115688041	115689012	7	114785938	117809632
Olfr504	MGI:3030338	7	115708351	115709307	7	114785938	117809632
Olfr506	MGI:3030340	7	115755823	115756767	7	114785938	117809632
Olfr507	MGI:3030341	7	115765328	115766278	7	114785938	117809632
Olfr508	MGI:3030342	7	115773508	115774440	7	114785938	117809632
Olfr509	MGI:3030343	7	115789123	115790088	7	114785938	117809632
Olfr510	MGI:3030344	7	115810932	115811876	7	114785938	117809632
Olfr512	MGI:3030346	7	115856869	115857849	7	114785938	117809632
Olfr513	MGI:3030347	7	115898372	115899301	7	114785938	117809632
Olfr514	MGI:3030348	7	115968579	115969511	7	114785938	117809632
Olfr516	MGI:3030350	7	115988578	115989522	7	114785938	117809632
Olfr517	MGI:3030351	7	116011722	116012666	7	114785938	117809632
Olfr518	MGI:3030352	7	116024117	116025118	7	114785938	117809632
Olfr519	MGI:3030353	7	116036975	116037919	7	114785938	117809632
Nlrp10	MGI:2444084	7	116065374	116073672	7	114785938	117809632
Eif3f	MGI:1913335	7	116077931	116086465	7	114785938	117809632
BC049265	MGI:3041253	7	116094171	116095323	7	114785938	117809632
Tub	MGI:2651573	7	116154339	116177974	7	114785938	117809632
Ric3	MGI:2443887	7	116177826	116226845	7	114785938	117809632
Lmo1	MGI:102812	7	116282085	116314027	7	114785938	117809632
Stk33	MGI:2152419	7	116422737	116582595	7	114785938	117809632
1700095J03Rik	MGI:1921543	7	116582132	116588407	7	114785938	117809632
Trim66	MGI:2152406	7	116592520	116651648	7	114785938	117809632
Rpl27a	MGI:1347076	7	116662661	116665881	7	114785938	117809632
St5	MGI:108517	7	116667425	116760661	7	114785938	117809632
Gm3915	MGI:3782089	7	116843045	116847122	7	114785938	117809632
D930014E17Rik	MGI:3041226	7	116847204	116855703	7	114785938	117809632
BC051019	MGI:1928824	7	116855695	116867364	7	114785938	117809632
Ascl3	MGI:1928820	7	116870979	116875246	7	114785938	117809632
Tmem9b	MGI:1915254	7	116879348	116896389	7	114785938	117809632
4930431P19Rik	MGI:1921136	7	116895834	116898792	7	114785938	117809632
Nrip3	MGI:1925843	7	116901569	116925539	7	114785938	117809632
Scube2	MGI:1928765	7	116942204	117009193	7	114785938	117809632
Phxr5	MGI:104521	7	116988530	116990548	7	114785938	117809632
Dennd5a	MGI:1201681	7	117037294	117103984	7	114785938	117809632
Tmem41b	MGI:1289225	7	117115701	117130443	7	114785938	117809632
Ipo7	MGI:2152414	7	117161939	117198628	7	114785938	117809632
AA474408	MGI:3034216	7	117204405	117204818	7	114785938	117809632
Zfp143	MGI:1277969	7	117205216	117238906	7	114785938	117809632
Wee1	MGI:103075	7	117265570	117286798	7	114785938	117809632
Swap70	MGI:1298390	7	117365275	117427017	7	114785938	117809632
Sbf2	MGI:1921831	7	117452860	117758436	7	114785938	117809632
Adm	MGI:108058	7	117771183	117773333	7	114785938	117809632
Zfp703	MGI:2662729	8	28087826	28091938	8	27484648	28789379
Erlin2	MGI:2387215	8	28134331	28149896	8	27484648	28789379
Prosc	MGI:1891207	8	28153075	28165038	8	27484648	28789379
Gpr124	MGI:1925810	8	28196313	28233890	8	27484648	28789379
Brf2	MGI:1913903	8	28234304	28239104	8	27484648	28789379
Rab11fip1	MGI:1923017	8	28249245	28285120	8	27484648	28789379
Got1l1	MGI:1923865	8	28307932	28313019	8	27484648	28789379
Adrb3	MGI:87939	8	28336248	28340060	8	27484648	28789379
Eif4ebp1	MGI:103267	8	28370850	28385985	8	27484648	28789379
Tex24	MGI:1921539	8	28454866	28459659	8	27484648	28789379
Chrnb3	MGI:106212	8	28479183	28510201	8	27484648	28789379
Chrna6	MGI:106213	8	28513686	28524356	8	27484648	28789379
Poteg	MGI:1918202	8	28558142	28574584	8	27484648	28789379
Gm1698	MGI:2686544	8	28714823	28730924	8	27484648	28789379
Gm3985	MGI:3782158	8	33998977	34060498	8	34023573	36367982
Gm6876	MGI:3647691	8	34125161	34182427	8	34023573	36367982
Wrn	MGI:109635	8	34346172	34495969	8	34023573	36367982
Purg	MGI:1922279	8	34496797	34497860	8	34023573	36367982
5930422O12Rik	MGI:2442538	8	34539268	34542471	8	34023573	36367982
Tex15	MGI:1934816	8	34627210	34696054	8	34023573	36367982
Ppp2cb	MGI:1321161	8	34710097	34730266	8	34023573	36367982
Ubxn8	MGI:1337129	8	34731481	34752431	8	34023573	36367982
Gsr	MGI:95804	8	34762995	34808635	8	34023573	36367982
1700104B16Rik	MGI:1925886	8	34841021	34841344	8	34023573	36367982
Gtf2e2	MGI:1915403	8	34842574	34887041	8	34023573	36367982
Rbpms	MGI:1334446	8	34893116	35040313	8	34023573	36367982
Gm4021	MGI:3782195	8	35028904	35032416	8	34023573	36367982
Gm9951	MGI:3641827	8	35112316	35120100	8	34023573	36367982
Dctn6	MGI:1343154	8	35153474	35171850	8	34023573	36367982
Mboat4	MGI:2685017	8	35186798	35187772	8	34023573	36367982
Leprotl1	MGI:1915442	8	35198626	35210087	8	34023573	36367982
Tmem66	MGI:1915137	8	35217642	35233738	8	34023573	36367982
Dusp4	MGI:2442191	8	35870351	35882948	8	34023573	36367982
Gm9648	MGI:3780055	8	35872588	35873463	8	34023573	36367982
Tnks	MGI:1341087	8	35892233	36028744	8	34023573	36367982
Gm9892	MGI:3701610	8	53281117	53282553	8	52221725	53364130
Npsr1	MGI:2441738	9	23902440	24120842	9	23507439	24541121
Gm10701	MGI:3642532	9	24146101	24223153	9	23507439	24541121
Dpy19l1	MGI:1915685	9	24216220	24307584	9	23507439	24541121
Dpy19l2	MGI:2444662	9	24361497	24500737	9	23507439	24541121
Cypt4	MGI:1916573	9	24429629	24430271	9	23507439	24541121
Tbx20	MGI:1888496	9	24527648	24578746	9	23507439	24541121
Gm2073	MGI:3780240	9	83236152	83238699	9	83119691	83667276
Lca5	MGI:1923032	9	83283900	83334734	9	83119691	83667276
Sh3bgrl2	MGI:1915350	9	83441945	83493899	9	83119691	83667276
Gm2109	MGI:3780277	9	83578731	83586854	9	83119691	83667276
Osbpl10	MGI:1921736	9	114976397	115141341	9	115059785	115506808
Stt3b	MGI:1915542	9	115152921	115219586	9	115059785	115506808
Gm9757	MGI:3704346	9	115218957	115219733	9	115059785	115506808
Gm2315	MGI:3780486	9	115256593	115303644	9	115059785	115506808
Gm5921	MGI:3648968	9	115346818	115347699	9	115059785	115506808
4930444G20Rik	MGI:2149738	10	21786398	21787885	10	21752750	21879854
E030030I06Rik	MGI:2442914	10	21833938	21868629	10	21752750	21879854
Raet1c	MGI:109431	10	21878375	22093945	10	21752750	21879854
Raet1c	MGI:109431	10	21878375	22093945	10	21936146	22101677
Gm2555	MGI:3780723	10	21936313	21938830	10	21936146	22101677
H60b	MGI:3649078	10	21993152	22008655	10	21936146	22101677
Raet1d	MGI:1861032	10	22082077	22093945	10	21936146	22101677
Gm6763	MGI:3643573	10	103605569	103608038	10	102909317	105114990
Gm8764	MGI:3643666	10	103614079	103616547	10	102909317	105114990
Gm8766	MGI:3643661	10	103622588	103625055	10	102909317	105114990
Gm4340	MGI:3782524	10	103631097	103633576	10	102909317	105114990
Gm3813	MGI:3781985	10	104432415	104441921	10	102909317	105114990
Tmtc2	MGI:1914057	10	104624719	105011507	10	102909317	105114990
Gm6770	MGI:3648469	10	104981881	104987559	10	102909317	105114990
Iltifb	MGI:2151139	10	117726685	117732094	10	117703057	117764072
Llgl1	MGI:102682	11	60513225	60527688	11	60390131	64692398
Flii	MGI:1342286	11	60527625	60540765	11	60390131	64692398
Smcr7	MGI:2144199	11	60541900	60546453	11	60390131	64692398
Top3a	MGI:1197527	11	60553560	60590867	11	60390131	64692398
Gm3881	MGI:3782054	11	60579847	60583296	11	60390131	64692398
Smcr8	MGI:2444720	11	60591026	60594569	11	60390131	64692398
Shmt1	MGI:98299	11	60601606	60624663	11	60390131	64692398
Dhrs7b	MGI:2384931	11	60644181	60673697	11	60390131	64692398
Tmem11	MGI:2144726	11	60677954	60692774	11	60390131	64692398
Gm16515	MGI:1344388	11	60715748	60728252	11	60390131	64692398
Gm16516	MGI:1344334	11	60734419	60745369	11	60390131	64692398
Map2k3	MGI:1346868	11	60745535	60766313	11	60390131	64692398
Kcnj12	MGI:108495	11	60836066	60884633	11	60390131	64692398
Tnfrsf13b	MGI:1889411	11	60940257	60962874	11	60390131	64692398
Usp22	MGI:2144157	11	60965287	60988557	11	60390131	64692398
Aldh3a1	MGI:1353451	11	61021039	61031923	11	60390131	64692398
Aldh3a2	MGI:1353452	11	61036919	61080966	11	60390131	64692398
Slc47a2	MGI:3588190	11	61117423	61156352	11	60390131	64692398
Slc47a1	MGI:1914723	11	61156903	61191847	11	60390131	64692398
Gm3923	MGI:3782097	11	61204631	61211164	11	60390131	64692398
Rnf112	MGI:106611	11	61261944	61267633	11	60390131	64692398
Mfap4	MGI:1342276	11	61298933	61302402	11	60390131	64692398
Mapk7	MGI:1346347	11	61302314	61307908	11	60390131	64692398
3110043A19Rik	MGI:1920466	11	61317888	61318561	11	60390131	64692398
B9d1	MGI:1351471	11	61318646	61326433	11	60390131	64692398
Epn2	MGI:1333766	11	61330751	61393187	11	60390131	64692398
Grap	MGI:1918770	11	61466767	61486286	11	60390131	64692398
Slc5a10	MGI:1926089	11	61486283	61534328	11	60390131	64692398
Fam83g	MGI:1916890	11	61497593	61523453	11	60390131	64692398
Prpsap2	MGI:2384838	11	61543156	61575564	11	60390131	64692398
Ulk2	MGI:1352758	11	61589151	61668575	11	60390131	64692398
A530017D24Rik	MGI:2144320	11	61678705	61682270	11	60390131	64692398
Akap10	MGI:1890218	11	61684809	61743754	11	60390131	64692398
Gm12273	MGI:3650148	11	61764417	61766238	11	60390131	64692398
Cytsb	MGI:2442356	11	61770281	62036507	11	60390131	64692398
Gm3406	MGI:3781584	11	61829616	61837617	11	60390131	64692398
Adora2b	MGI:99403	11	62062486	62079955	11	60390131	64692398
Zswim7	MGI:1916997	11	62080726	62094877	11	60390131	64692398
Ttc19	MGI:1920045	11	62094975	62141953	11	60390131	64692398
Ncor1	MGI:1349717	11	62129928	62272043	11	60390131	64692398
Pigl	MGI:2681271	11	62271787	62329795	11	60390131	64692398
Cenpv	MGI:1920389	11	62338448	62352763	11	60390131	64692398
Ubb	MGI:98888	11	62364673	62366715	11	60390131	64692398
Trpv2	MGI:1341836	11	62387988	62414017	11	60390131	64692398
2410006H16Rik	MGI:1916471	11	62416379	62418309	11	60390131	64692398
BC046404	MGI:2682293	11	62418386	62462025	11	60390131	64692398
Mmgt2	MGI:2448491	11	62462241	62479856	11	60390131	64692398
Zfp287	MGI:2176561	11	62513858	62545407	11	60390131	64692398
Gm4019	MGI:3782193	11	62563799	62564849	11	60390131	64692398
Gm10428	MGI:3704375	11	62565413	62567923	11	60390131	64692398
Zfp286	MGI:2384758	11	62566879	62602964	11	60390131	64692398
Trim16	MGI:2137356	11	62633733	62664310	11	60390131	64692398
Fbxw10	MGI:3052463	11	62660571	62690967	11	60390131	64692398
Fam18b	MGI:1914760	11	62692957	62730282	11	60390131	64692398
Cdrt4	MGI:1913588	11	62764695	62806597	11	60390131	64692398
Tekt3	MGI:1918312	11	62875156	62908466	11	60390131	64692398
Pmp22	MGI:97631	11	62942484	62973049	11	60390131	64692398
Hs3st3b1	MGI:1333853	11	63699294	63735792	11	60390131	64692398
Cox10	MGI:1917633	11	63776129	63892970	11	60390131	64692398
2810001G20Rik	MGI:1913706	11	63892986	63896761	11	60390131	64692398
Gm5783	MGI:3644950	11	64076754	64087539	11	60390131	64692398
F930015N05Rik	MGI:3606161	11	64248635	64249314	11	60390131	64692398
Hs3st3a1	MGI:1333861	11	64248834	64336343	11	60390131	64692398
Gm12292	MGI:3649414	11	64654102	64657255	11	60390131	64692398
Gm2217	MGI:3780387	11	94650609	94653690	11	94624371	96334537
Col1a1	MGI:88467	11	94797538	94814356	11	94624371	96334537
Sgca	MGI:894698	11	94824105	94837641	11	94624371	96334537
Hils1	MGI:2136691	11	94828907	94829770	11	94624371	96334537
Ppp1r9b	MGI:2387581	11	94852349	94868213	11	94624371	96334537
Samd14	MGI:2384945	11	94871193	94887401	11	94624371	96334537
Pdk2	MGI:1343087	11	94887572	94902668	11	94624371	96334537
Itga3	MGI:96602	11	94905788	94938115	11	94624371	96334537
Dlx3	MGI:94903	11	94981403	94986610	11	94624371	96334537
Dlx4	MGI:94904	11	95001761	95007115	11	94624371	96334537
Gm11515	MGI:3649766	11	95084604	95086946	11	94624371	96334537
Tac4	MGI:1931130	11	95122843	95130579	11	94624371	96334537
Myst2	MGI:2182799	11	95135573	95171560	11	94624371	96334537
Fam117a	MGI:2144564	11	95198332	95243186	11	94624371	96334537
Slc35b1	MGI:1343133	11	95246006	95253090	11	94624371	96334537
Spop	MGI:1343085	11	95275394	95354720	11	94624371	96334537
Nxph3	MGI:1336188	11	95371159	95375884	11	94624371	96334537
Ngfr	MGI:97323	11	95430132	95449049	11	94624371	96334537
Phb	MGI:97572	11	95528271	95542087	11	94624371	96334537
Gm9796	MGI:3648412	11	95559134	95559694	11	94624371	96334537
Zfp652	MGI:2442221	11	95573987	95696429	11	94624371	96334537
B130006D01Rik	MGI:2444371	11	95584901	95588024	11	94624371	96334537
Gm7564	MGI:3644307	11	95685266	95685870	11	94624371	96334537
Phospho1	MGI:2447348	11	95685813	95693454	11	94624371	96334537
Abi3	MGI:1913860	11	95691388	95703790	11	94624371	96334537
Gngt2	MGI:893584	11	95698530	95707048	11	94624371	96334537
Gm11527	MGI:3649799	11	95719476	95720488	11	94624371	96334537
B4galnt2	MGI:1342058	11	95727257	95776205	11	94624371	96334537
Igf2bp1	MGI:1890357	11	95818477	95867254	11	94624371	96334537
Gm2567	MGI:3780734	11	95867647	95868469	11	94624371	96334537
Gip	MGI:107504	11	95885859	95892145	11	94624371	96334537
Snf8	MGI:1343161	11	95896199	95908744	11	94624371	96334537
Ube2z	MGI:1343160	11	95908746	95926702	11	94624371	96334537
Atp5g1	MGI:107653	11	95930166	95936984	11	94624371	96334537
Calcoco2	MGI:1343177	11	95960640	95973278	11	94624371	96334537
Ttll6	MGI:2683461	11	95995100	96026765	11	94624371	96334537
Hoxb13	MGI:107730	11	96055630	96058761	11	94624371	96334537
Gm11538	MGI:3649911	11	96064768	96066699	11	94624371	96334537
Gm53	MGI:2684899	11	96112908	96126182	11	94624371	96334537
Hoxb9	MGI:96190	11	96132823	96137909	11	94624371	96334537
Hoxb8	MGI:96189	11	96143219	96146639	11	94624371	96334537
Hoxb7	MGI:96188	11	96145877	96151650	11	94624371	96334537
Hoxb6	MGI:96187	11	96160390	96162883	11	94624371	96334537
Hoxb5	MGI:96186	11	96164826	96167435	11	94624371	96334537
Hoxb4	MGI:96185	11	96180011	96182952	11	94624371	96334537
Hoxb3	MGI:96184	11	96184640	96207999	11	94624371	96334537
Gm11536	MGI:3650116	11	96197613	96203422	11	94624371	96334537
Hoxb2	MGI:96183	11	96213125	96215330	11	94624371	96334537
Gm10980	MGI:3779193	11	96221935	96222064	11	94624371	96334537
Hoxb1	MGI:96182	11	96227066	96229570	11	94624371	96334537
Gm11529	MGI:3649352	11	96309637	96325861	11	94624371	96334537
Skap1	MGI:1925723	11	96325907	96620444	11	94624371	96334537
Gm10480	MGI:3642435	12	18223364	18224634	12	18177648	19164891
Gm9590	MGI:3779999	12	18394561	18413667	12	18177648	19164891
5730507C01Rik	MGI:1917882	12	18521544	18540997	12	18177648	19164891
Gm3944	MGI:3782118	12	18859727	18876660	12	18177648	19164891
Gm16844	MGI:4439768	12	114494412	114498447	12	114432955	117134038
Gm900	MGI:2685746	12	114509391	114511457	12	114432955	117134038
AI324046	MGI:2144790	12	114595653	114599443	12	114432955	117134038
Gm11029	MGI:3779252	12	114655095	114657149	12	114432955	117134038
Gm10423	MGI:3704397	12	114655290	114655712	12	114432955	117134038
Adam6b	MGI:2444636	12	114727776	114730046	12	114432955	117134038
Adam6a	MGI:2676316	12	114782119	114784625	12	114432955	117134038
Gm16970	MGI:4439894	12	114826478	114826911	12	114432955	117134038
Gm16948	MGI:4439872	12	114849395	114849828	12	114432955	117134038
Gm16592	MGI:4439516	12	114940335	114940789	12	114432955	117134038
Gm16609	MGI:4439533	12	115097360	115097827	12	114432955	117134038
Gm16700	MGI:4439624	12	115117307	115117740	12	114432955	117134038
Gm16698	MGI:4439622	12	115134619	115135157	12	114432955	117134038
Gm16699	MGI:4439623	12	115150236	115150694	12	114432955	117134038
Gm16996	MGI:4439920	12	115170170	115170588	12	114432955	117134038
Gm16612	MGI:4439536	12	115186493	115186943	12	114432955	117134038
Gm16683	MGI:4439607	12	115232680	115233109	12	114432955	117134038
Gm16999	MGI:4439923	12	115272016	115272487	12	114432955	117134038
Gm16840	MGI:4439764	12	115298056	115298484	12	114432955	117134038
Gm16842	MGI:4439766	12	115391395	115391855	12	114432955	117134038
Gm16839	MGI:4439763	12	115460999	115461465	12	114432955	117134038
Gm7112	MGI:3648045	12	115500863	115501161	12	114432955	117134038
Gm16932	MGI:4439856	12	115526363	115526793	12	114432955	117134038
Gm7175	MGI:3646379	12	115538172	115538465	12	114432955	117134038
Gm17000	MGI:4439924	12	115707286	115707606	12	114432955	117134038
Gm16697	MGI:4439621	12	115821780	115822213	12	114432955	117134038
Gm16735	MGI:4439659	12	116089401	116089834	12	114432955	117134038
Gm16966	MGI:4439890	12	116229319	116229612	12	114432955	117134038
AB069917	MGI:3576502	12	116396614	116397046	12	114432955	117134038
Gm9740	MGI:3815333	12	116532277	116532573	12	114432955	117134038
Gm16900	MGI:4439824	12	116597351	116597783	12	114432955	117134038
Gm9232	MGI:3704125	12	116624918	116625199	12	114432955	117134038
Gm16709	MGI:4439633	12	116996195	116996627	12	114432955	117134038
Gm16710	MGI:4439634	12	117040859	117041291	12	114432955	117134038
Gm16746	MGI:4439670	12	117100078	117100511	12	114432955	117134038
Gm16812	MGI:4439736	12	117106984	117107413	12	114432955	117134038
Adarb2	MGI:2151118	13	8202112	8767993	13	6997089	10443462
Gm8372	MGI:3644813	13	8452489	8454561	13	6997089	10443462
Wdr37	MGI:1920393	13	8802214	8870976	13	6997089	10443462
Idi1	MGI:2442264	13	8885220	8891616	13	6997089	10443462
Gm9745	MGI:3704398	13	8940951	8947489	13	6997089	10443462
Idi2	MGI:2444315	13	8952109	8960181	13	6997089	10443462
Gtpbp4	MGI:1916487	13	8971710	8995258	13	6997089	10443462
Larp4b	MGI:106330	13	9093151	9172332	13	6997089	10443462
Dip2c	MGI:1920179	13	9276228	9668171	13	6997089	10443462
Zmynd11	MGI:1913755	13	9684082	9764567	13	6997089	10443462
Chrm3	MGI:88398	13	9875859	10360049	13	6997089	10443462
Pde4d	MGI:99555	13	109240142	110743669	13	110110098	110798807
AI452195	MGI:2145249	13	110744317	110746171	13	110110098	110798807
Thrb	MGI:98743	14	18493474	18870600	14	17623262	19590407
Nr1d2	MGI:2449205	14	19036568	19071641	14	17623262	19590407
Rpl15	MGI:1913730	14	19100337	19103905	14	17623262	19590407
Nkiras1	MGI:1916971	14	19103650	19116456	14	17623262	19590407
Ube2e1	MGI:107411	14	19115236	19164373	14	17623262	19590407
Ube2e2	MGI:2384997	14	19406091	19726781	14	17623262	19590407
Dach1	MGI:1277991	14	98186072	98568984	14	96985655	100493684
Mzt1	MGI:1924039	14	99434692	99445299	14	96985655	100493684
6720463M24Rik	MGI:1924994	14	99445596	99473326	14	96985655	100493684
Dis3	MGI:1919912	14	99476489	99498959	14	96985655	100493684
Pibf1	MGI:1261910	14	99498652	99653712	14	96985655	100493684
Klf5	MGI:1338056	14	99697910	99712624	14	96985655	100493684
Klf12	MGI:1333796	14	100269869	100549015	14	96985655	100493684
Cdh10	MGI:107436	15	18750084	18943989	15	18924074	22532103
Gm6267	MGI:3779581	15	19440077	19648475	15	18924074	22532103
Acot10	MGI:1928940	15	20595089	20596408	15	18924074	22532103
Cdh12	MGI:109503	15	21041207	21519288	15	18924074	22532103
Gm2727	MGI:3780896	15	21825012	21829418	15	18924074	22532103
Kcns2	MGI:1197011	15	34767136	34772092	15	34677417	36278636
Stk3	MGI:1928487	15	34805251	35085561	15	34677417	36278636
Osr2	MGI:1930813	15	35225867	35233060	15	34677417	36278636
Vps13b	MGI:1916380	15	35301304	35859849	15	34677417	36278636
Gm7968	MGI:3644983	15	35519069	35521393	15	34677417	36278636
Cox6c	MGI:104614	15	35855641	35868001	15	34677417	36278636
Rgs22	MGI:3613651	15	35939245	36052087	15	34677417	36278636
Fbxo43	MGI:1926053	15	36079815	36094639	15	34677417	36278636
1700074I03Rik	MGI:1920780	15	36094375	36095202	15	34677417	36278636
Polr2k	MGI:102725	15	36103855	36106698	15	34677417	36278636
Spag1	MGI:1349387	15	36109123	36165365	15	34677417	36278636
Rnf19a	MGI:1353623	15	36169689	36212888	15	34677417	36278636
Pdia5	MGI:1919849	16	35397399	35490959	16	35475245	35558381
Sema5b	MGI:107555	16	35541231	35664818	16	35475245	35558381
Gm4439	MGI:3782622	16	54204783	54212403	16	54202375	54620529
Hspa13	MGI:1309463	16	75755435	75767066	16	75766687	75961458
Samsn1	MGI:1914992	16	75859038	76022515	16	75766687	75961458
Gm16509	MGI:3641946	16	80947590	80950214	16	80948755	80969579
Tcp10b	MGI:98542	17	13253977	13275092	17	13248223	13657662
Gm11166	MGI:3810119	17	13289545	13291338	17	13248223	13657662
Unc93a	MGI:1933250	17	13301483	13324657	17	13248223	13657662
Gm10512	MGI:3642173	17	13397908	13399077	17	13248223	13657662
Smok2a	MGI:1351487	17	13414054	13420524	17	13248223	13657662
Smok2b	MGI:3037705	17	13421718	13430055	17	13248223	13657662
Gm9880	MGI:3711246	17	13547438	13569717	17	13248223	13657662
BC018101	MGI:3052731	17	17201077	17226592	17	17130988	17318700
Zfp97	MGI:105921	17	17258379	17283795	17	17130988	17318700
Vmn2r113	MGI:3648972	17	23080151	23095781	17	23061697	23335002
Zfp40	MGI:99185	17	23310836	23330219	17	23061697	23335002
Btbd9	MGI:1916625	17	30357046	30667310	17	30586907	31057733
Gm9874	MGI:3642006	17	30622456	30622908	17	30586907	31057733
Glo1	MGI:95742	17	30729806	30749539	17	30586907	31057733
1700097N02Rik	MGI:1914772	17	30759394	30762030	17	30586907	31057733
Dnahc8	MGI:107714	17	30763936	31012209	17	30586907	31057733
Gm9937	MGI:3642051	17	31011751	31012146	17	30586907	31057733
Glp1r	MGI:99571	17	31038812	31073455	17	30586907	31057733
H2-T24	MGI:95958	17	36142640	36157505	17	36157330	36910353
H2-T23	MGI:95957	17	36166921	36169646	17	36157330	36910353
H2-T22	MGI:95956	17	36175352	36179692	17	36157330	36910353
H2-T9	MGI:95965	17	36175352	36179692	17	36157330	36910353
Gm6034	MGI:3646212	17	36179906	36195590	17	36157330	36910353
Gm11127	MGI:3779381	17	36193272	36193385	17	36157330	36910353
H2-Bl	MGI:892004	17	36216993	36221404	17	36157330	36910353
C920025E04Rik	MGI:2442805	17	36246172	36248792	17	36157330	36910353
H2-T10	MGI:95942	17	36254035	36258389	17	36157330	36910353
Gm10500	MGI:3641966	17	36258775	36265692	17	36157330	36910353
Gm10499	MGI:3702919	17	36278703	36282868	17	36157330	36910353
2410017I17Rik	MGI:1916967	17	36292064	36292354	17	36157330	36910353
Gm8909	MGI:3704134	17	36301918	36305467	17	36157330	36910353
H2-T3	MGI:95959	17	36322518	36327232	17	36157330	36910353
Rpp21	MGI:1914926	17	36392618	36394788	17	36157330	36910353
Trim39	MGI:1890659	17	36395818	36408949	17	36157330	36910353
H2-M10.2	MGI:1276525	17	36421224	36423385	17	36157330	36910353
H2-M10.1	MGI:1276522	17	36459803	36463100	17	36157330	36910353
H2-M10.3	MGI:1276524	17	36501950	36505361	17	36157330	36910353
Gm318	MGI:2685164	17	36533966	36535604	17	36157330	36910353
H2-M10.4	MGI:1276527	17	36595862	36599279	17	36157330	36910353
H2-M11	MGI:2676637	17	36684020	36686199	17	36157330	36910353
H2-M9	MGI:1276570	17	36777351	36779611	17	36157330	36910353
H2-M1	MGI:95913	17	36806953	36809164	17	36157330	36910353
H2-M10.5	MGI:1276526	17	36909855	36913179	17	36157330	36910353
Ehd3	MGI:1928900	17	74154181	74181433	17	74084271	76075230
Xdh	MGI:98973	17	74233248	74299522	17	74084271	76075230
Srd5a2	MGI:2150380	17	74367046	74397256	17	74084271	76075230
Memo1	MGI:1924140	17	74600046	74694156	17	74084271	76075230
Dpy30	MGI:1913560	17	74698821	74715761	17	74084271	76075230
Spast	MGI:1858896	17	74738327	74787826	17	74084271	76075230
Slc30a6	MGI:2386741	17	74794972	74823569	17	74084271	76075230
Nlrc4	MGI:3036243	17	74825635	74858448	17	74084271	76075230
Yipf4	MGI:1915114	17	74888856	74899313	17	74084271	76075230
Birc6	MGI:1276108	17	74927635	75102403	17	74084271	76075230
Ttc27	MGI:1921446	17	75117090	75262909	17	74084271	76075230
Ltbp1	MGI:109151	17	75404908	75791852	17	74084271	76075230
Rasgrp3	MGI:3028579	17	75864953	75928383	17	74084271	76075230
Fam98a	MGI:1919972	17	75936426	75951286	17	74084271	76075230
Gm10494	MGI:3642373	17	79908583	79908708	17	79820803	81008424
Gm11097	MGI:3779333	17	79926431	79927237	17	79820803	81008424
Fam82a1	MGI:2147043	17	80014240	80081492	17	79820803	81008424
4921513D11Rik	MGI:1918173	17	80026017	80028021	17	79820803	81008424
Cyp1b1	MGI:88590	17	80106293	80114381	17	79820803	81008424
1700038P13Rik	MGI:1920515	17	80112612	80115776	17	79820803	81008424
Gm9382	MGI:3644108	17	80133214	80144413	17	79820803	81008424
Atl2	MGI:1929492	17	80247732	80295463	17	79820803	81008424
Hnrpll	MGI:1919942	17	80429683	80461608	17	79820803	81008424
Galm	MGI:2442420	17	80526811	80584441	17	79820803	81008424
Srsf7	MGI:1926232	17	80600653	80606645	17	79820803	81008424
Ttc39d	MGI:1914987	17	80606800	80617276	17	79820803	81008424
Gemin6	MGI:1914492	17	80623781	80627837	17	79820803	81008424
Dhx57	MGI:2147067	17	80637652	80689816	17	79820803	81008424
Morn2	MGI:2674071	17	80689572	80696813	17	79820803	81008424
Arhgef33	MGI:2685787	17	80746880	80769745	17	79820803	81008424
Gm10190	MGI:3642237	17	80772558	80772881	17	79820803	81008424
Sos1	MGI:98354	17	80793092	80879793	17	79820803	81008424
Cdkl4	MGI:3587025	17	80923496	80963174	17	79820803	81008424
F420015M19Rik	MGI:3588283	17	80963368	80965648	17	79820803	81008424
Map4k3	MGI:2154405	17	80979852	81127433	17	79820803	81008424
Dcc	MGI:94869	18	71418392	72510723	18	71936704	74296573
Gm10533	MGI:3641672	18	72502149	72502627	18	71936704	74296573
Gm4422	MGI:3782607	18	73070187	73080742	18	71936704	74296573
Mex3c	MGI:2652843	18	73732698	73752229	18	71936704	74296573
Smad4	MGI:894293	18	73798663	73863434	18	71936704	74296573
Elac1	MGI:1890495	18	73894692	73914133	18	71936704	74296573
Me2	MGI:2147351	18	73929694	73975046	18	71936704	74296573
Mro	MGI:2152817	18	74019039	74040987	18	71936704	74296573
Mapk4	MGI:2444559	18	74088140	74225013	18	71936704	74296573
Gm9925	MGI:3641738	18	74224756	74225238	18	71936704	74296573
Gm672	MGI:2685518	18	75590878	75857208	18	75778661	76492635
Zbtb7c	MGI:2443302	18	75979832	76308215	18	75778661	76492635
1700003O11Rik	MGI:1922882	18	76173865	76175331	18	75778661	76492635
4833419G08Rik	MGI:1922092	18	76218694	76220270	18	75778661	76492635
Smad2	MGI:108051	18	76401563	76464962	18	75778661	76492635
Nfatc1	MGI:102469	18	80802944	80909797	18	80809674	81284863
Atp9b	MGI:1354757	18	80931816	81130797	18	80809674	81284863
Sall3	MGI:109295	18	81163115	81183317	18	80809674	81284863
Gm3773	MGI:3781947	19	35470644	35674415	19	35248995	36183745
A830019P07Rik	MGI:3028035	19	35910851	35999067	19	35248995	36183745
Htr7	MGI:99841	19	36033224	36131850	19	35248995	36183745
Rpp30	MGI:1859683	19	36158221	36179262	19	35248995	36183745
Gm14525	MGI:3802008	X	26099903	26129764	X	26024727	26456255
Gm2015	MGI:3780184	X	26202257	26212991	X	26024727	26456255
Gm6121	MGI:3779555	X	26339869	26362823	X	26024727	26456255
Dmrtc1c1	MGI:1918333	X	99998302	100005281	X	99995346	100053963
Dmrtc1c2	MGI:3802967	X	100042978	100049955	X	99995346	100053963
Mid1	MGI:1100537	X	166123131	166428730	X	166410784	166435099
G530011O06Rik	MGI:3603513	X	166412975	166416849	X	166410784	166435099
Gm4064	MGI:3782239	Y	2041075	2052134	Y	2043941	2419699
Rbmy1a1	MGI:104732	Y	2086609	2097407	Y	2043941	2419699
Gm10256	MGI:3710530	Y	2118068	2129384	Y	2043941	2419699
Gm10352	MGI:3708825	Y	2160043	2168098	Y	2043941	2419699
Gm3376	MGI:3781554	Y	2387258	2398856	Y	2043941	2419699

## Sheet: b)
Gene					CNV (JaxMDGA)
Symbol	MGI.ID	Chr	start	end	Chr	Start	End
Ogfrl1	MGI:1917405	1	23373263	23390014	1	23385854	23385855
Prim2	MGI:97758	1	33510659	33726600	1	33723902	33723981
Hmcn1	MGI:2685047	1	152409654	152840565	1	152551318	152551619
Npl	MGI:1921341	1	155350146	155396844	1	155364069	155371516
Ufc1	MGI:1913405	1	173218694	173225155	1	173219128	173222721
Scai	MGI:2443716	2	38921734	39046250	2	38976620	38976716
Gca	MGI:1918521	2	62502342	62532166	2	62524035	62524468
Zfp385b	MGI:2444734	2	77248691	77657696	2	77622967	77623672
Sirpb1a	MGI:2444824	3	15371819	15426504	3	15340258	15819607
Sirpb1b	MGI:3779828	3	15495754	15575065	3	15340258	15819607
Sirpb1c	MGI:3807521	3	15695145	15748528	3	15340258	15819607
Slc39a8	MGI:1914797	3	135488243	135551532	3	135520542	135521192
Emcn	MGI:1891716	3	137004031	137095149	3	137035705	137036277
Ptprd	MGI:97812	4	75587143	77857865	4	77028168	77043306
Ptprd	MGI:97812	4	75587143	77857865	4	77228417	77255056
Skint4	MGI:2444425	4	111744621	111840681	4	111745396	112236356
Skint3	MGI:3045331	4	111904850	111973073	4	111745396	112236356
Skint9	MGI:3045341	4	112058574	112106590	4	111745396	112236356
Skint6	MGI:3649262	4	112908844	112959568	4	112496803	113613316
Skint5	MGI:3650151	4	113613249	113672102	4	112496803	113613316
Skint11	MGI:2685415	4	113835989	113917633	4	113807995	113925623
Aldh4a1	MGI:2443883	4	139178781	139205605	4	139194302	139196589
Rbpj	MGI:96522	5	53947018	54048684	5	54034662	54046325
Gm3259	MGI:3781437	5	95734834	95772936	5	95772662	95914255
Gm7963	MGI:3643214	5	95854546	95857656	5	95772662	95914255
D5Ertd577e	MGI:1261918	5	95885825	95914583	5	95772662	95914255
C230055K05Rik	MGI:2441896	5	105242188	105288830	5	105072998	105359320
Sgsm1	MGI:107320	5	113672240	113739806	5	113687145	113687269
Nos1	MGI:97360	5	118231041	118408849	5	118388158	118388803
Denr	MGI:1915434	5	124357300	124377593	5	124367246	124378643
Foxp2	MGI:2148705	6	14851388	15391201	6	15022430	15034563
Slc13a1	MGI:1859937	6	24038295	24118092	6	24062940	24063639
Gm16637	MGI:4439561	6	68581957	68582424	6	68535332	68654639
Foxp1	MGI:1914004	6	98875332	99216526	6	98894638	98894702
Pdzrn3	MGI:1933157	6	101099603	101327891	6	101283676	101286899
Usp18	MGI:1344364	6	121195974	121220935	6	121211838	121212147
Lrmp	MGI:108424	6	145064173	145123454	6	145118279	145118297
Vmn1r72	MGI:2182256	7	12254948	12255868	7	12211054	12258765
Vmn1r78	MGI:2159646	7	12737813	12738754	7	12712933	12770476
V1rg10	MGI:2159654	7	12761542	12762462	7	12712933	12770476
1600014C10Rik	MGI:1919494	7	38968835	38979989	7	38968839	38982162
Gm6605	MGI:3644762	7	39231315	39237190	7	39182758	46566513
Gm5591	MGI:3648692	7	39303158	39313212	7	39182758	46566513
Gm4454	MGI:3782638	7	39351859	39356187	7	39182758	46566513
Gm1988	MGI:3780157	7	46425170	46435208	7	39182758	46566513
Gm6124	MGI:3779556	7	46474468	46480344	7	39182758	46566513
Gm16387	MGI:3646111	7	46511994	46519904	7	39182758	46566513
Gm6833	MGI:3645553	7	46562898	46572951	7	39182758	46566513
Gm2128	MGI:3780298	7	48410845	48414225	7	48376754	48548430
Gm6866	MGI:3646160	7	48465535	48474629	7	48376754	48548430
Gm5592	MGI:3648691	7	48539697	48545553	7	48376754	48548430
Siglece	MGI:1932475	7	50906442	50915515	7	50914593	50915973
5730590G19Rik	MGI:1924261	7	86805082	86843020	7	86827857	86840695
Olfr555	MGI:3030389	7	109807337	109808284	7	109794774	109817294
Olfr558	MGI:3030392	7	109850845	109860568	7	109855744	109858484
Dub2a	MGI:3051372	7	110398251	110401019	7	110370728	110491407
Olfr596	MGI:3030430	7	110458237	110459175	7	110370728	110491407
Olfr597	MGI:3030431	7	110468915	110469874	7	110370728	110491407
Olfr598	MGI:3030432	7	110477002	110477961	7	110370728	110491407
Olfr599	MGI:3030433	7	110486570	110487517	7	110370728	110491407
Olfr635	MGI:3030469	7	111127690	111128655	7	111120174	111154197
Olfr638	MGI:3030472	7	111151773	111152738	7	111120174	111154197
Trim34-1	MGI:2137359	7	111392973	111489207	7	111428102	111428284
Trim5	MGI:3646853	7	111411900	111436608	7	111428102	111428284
Trim34-1	MGI:2137359	7	111392973	111489207	7	111485184	111496828
Gm15134	MGI:3805550	7	111448744	111485423	7	111485184	111496828
Trim12-2	MGI:4821183	7	111487268	111501876	7	111485184	111496828
Olfr471	MGI:3030305	7	115004566	115005492	7	115004586	115010378
Olfr486	MGI:3030320	7	115315312	115316256	7	115315404	115395389
Olfr487	MGI:3030321	7	115355097	115356041	7	115315404	115395389
Olfr506	MGI:3030340	7	115755823	115756767	7	115735206	115755917
9130019O22Rik	MGI:1926171	7	134525774	134530680	7	134527650	134530651
Tex24	MGI:1921539	8	28454866	28459659	8	28413570	28459049
Clasp2	MGI:1923749	9	113721704	113828815	9	113721718	113722368
Gpd1l	MGI:1289257	9	114808459	114843105	9	114814744	114815708
Utrn	MGI:104631	10	12101986	12581533	10	12334301	12334411
E030030I06Rik	MGI:2442914	10	21833938	21868629	10	21842578	21901891
Raet1c	MGI:109431	10	21878375	22093945	10	21842578	21901891
Raet1e	MGI:2675273	10	21893327	21903720	10	21842578	21901891
Raet1c	MGI:109431	10	21878375	22093945	10	22001970	22093887
H60b	MGI:3649078	10	21993152	22008655	10	22001970	22093887
Raet1d	MGI:1861032	10	22082077	22093945	10	22001970	22093887
Bicc1	MGI:1933388	10	70385580	70622448	10	70494361	70494548
Iltifb	MGI:2151139	10	117726685	117732094	10	117724329	117731673
Olfr56	MGI:1333785	11	48864235	48948889	11	48872511	48886868
Tgtp2	MGI:3710083	11	48870696	48877708	11	48872511	48886868
Cdkl3	MGI:2388268	11	51817723	51903286	11	51897884	51901279
Zfp867	MGI:2681848	11	59275298	59285976	11	59279699	59279901
Zfp287	MGI:2176561	11	62513858	62545407	11	62542340	62560811
Gm10480	MGI:3642435	12	18223364	18224634	12	18193095	18552020
Gm9590	MGI:3779999	12	18394561	18413667	12	18193095	18552020
5730507C01Rik	MGI:1917882	12	18521544	18540997	12	18193095	18552020
Nampt	MGI:1929865	12	33505340	33536472	12	33508991	33511335
Eml5	MGI:2442513	12	100024814	100139694	12	100077912	100080008
Golga5	MGI:1351475	12	103707402	103736112	12	103731977	103732056
Gm16948	MGI:4439872	12	114849395	114849828	12	114835711	114849501
Gm16999	MGI:4439923	12	115272016	115272487	12	115272059	115379105
Gm16840	MGI:4439764	12	115298056	115298484	12	115272059	115379105
Gm16697	MGI:4439621	12	115821780	115822213	12	115795799	115836215
Gm16735	MGI:4439659	12	116089401	116089834	12	116067623	116152952
AB069917	MGI:3576502	12	116396614	116397046	12	116369970	116396752
Gm9740	MGI:3815333	12	116532277	116532573	12	116434487	116573983
Gm16746	MGI:4439670	12	117100078	117100511	12	117072297	117150693
Gm16812	MGI:4439736	12	117106984	117107413	12	117072297	117150693
5033411D12Rik	MGI:1923221	13	16949689	17786566	13	17222975	17223138
5033411D12Rik	MGI:1923221	13	16949689	17786566	13	17390746	17391604
Vmn1r188	MGI:2182259	13	22179747	22180673	13	22180406	22247428
Vmn1r189	MGI:2182257	13	22193596	22194534	13	22180406	22247428
Cast	MGI:1098236	13	74831734	74945369	13	74876460	74877016
Pde4d	MGI:99555	13	109240142	110743669	13	110143424	110148369
Pde4d	MGI:99555	13	109240142	110743669	13	110285017	110311302
Pde4d	MGI:99555	13	109240142	110743669	13	110333876	110360210
Pde4d	MGI:99555	13	109240142	110743669	13	110512099	110531531
4930452B06Rik	MGI:1926154	14	9263706	9498754	14	9476924	9484124
Ghitm	MGI:1913342	14	37935137	37948484	14	37934577	37948431
Gm4606	MGI:3782789	14	73240448	73263362	14	73245931	73246173
Elf1	MGI:107180	14	79881001	79982283	14	79921672	79935942
Cdh12	MGI:109503	15	21041207	21519288	15	21160286	21161985
Depdc6	MGI:2146322	15	54943872	55090826	15	55025921	55026265
Lrrk2	MGI:1913975	15	91503606	91646551	15	91561909	91562071
Cd80	MGI:101775	16	38459013	38487015	16	38482477	38482801
Impg2	MGI:3044955	16	56204426	56273869	16	56226901	56232819
Tcp10b	MGI:98542	17	13253977	13275092	17	13259210	13273029
Gm10512	MGI:3642173	17	13397908	13399077	17	13398713	13649185
Smok2a	MGI:1351487	17	13414054	13420524	17	13398713	13649185
Smok2b	MGI:3037705	17	13421718	13430055	17	13398713	13649185
Gm9880	MGI:3711246	17	13547438	13569717	17	13398713	13649185
Btbd9	MGI:1916625	17	30357046	30667310	17	30593663	31058945
Gm9874	MGI:3642006	17	30622456	30622908	17	30593663	31058945
Glo1	MGI:95742	17	30729806	30749539	17	30593663	31058945
1700097N02Rik	MGI:1914772	17	30759394	30762030	17	30593663	31058945
Dnahc8	MGI:107714	17	30763936	31012209	17	30593663	31058945
Gm9937	MGI:3642051	17	31011751	31012146	17	30593663	31058945
Glp1r	MGI:99571	17	31038812	31073455	17	30593663	31058945
H2-T24	MGI:95958	17	36142640	36157505	17	36151872	36151991
H2-T23	MGI:95957	17	36166921	36169646	17	36167127	36183978
H2-T22	MGI:95956	17	36175352	36179692	17	36167127	36183978
H2-T9	MGI:95965	17	36175352	36179692	17	36167127	36183978
Gm6034	MGI:3646212	17	36179906	36195590	17	36167127	36183978
H2-T10	MGI:95942	17	36254035	36258389	17	36257749	36299506
Gm10500	MGI:3641966	17	36258775	36265692	17	36257749	36299506
Gm10499	MGI:3702919	17	36278703	36282868	17	36257749	36299506
2410017I17Rik	MGI:1916967	17	36292064	36292354	17	36257749	36299506
Rftn1	MGI:1923688	17	50131582	50329999	17	50132851	50142478
Slc5a7	MGI:1927126	17	54412915	54436487	17	54423215	54423288
Slc30a6	MGI:2386741	17	74794972	74823569	17	74806593	74808253
Klraq1	MGI:1921075	17	88929577	88987426	17	88954202	88963711
Bin1	MGI:108092	18	32536911	32595385	18	32594657	32600787
Rcor2	MGI:1859854	19	7341815	7349715	19	7348368	7349675
Pkd2l1	MGI:1352448	19	44222127	44266932	19	44222802	44222830
Mid1	MGI:1100537	X	166123131	166428730	X	166410987	166428718
G530011O06Rik	MGI:3603513	X	166412975	166416849	X	166410987	166428718

## Sheet: c)
Gene					CNV (NGS)
Symbol	MGI.ID	Chr	start	end	Chr	Start	End
Sntg1	MGI:1918346	1	8351556	9289959	1	8496801	8502001
Sntg1	MGI:1918346	1	8351556	9289959	1	8503601	8508601
Sntg1	MGI:1918346	1	8351556	9289959	1	8941401	8943601
Sntg1	MGI:1918346	1	8351556	9289959	1	8951401	8954601
Sntg1	MGI:1918346	1	8351556	9289959	1	8958001	8965201
Sntg1	MGI:1918346	1	8351556	9289959	1	9003401	9004801
Sntg1	MGI:1918346	1	8351556	9289959	1	9211201	9212801
2610203C22Rik	MGI:1919731	1	9550913	9621256	1	9569801	9572401
Cpa6	MGI:3045348	1	10314801	10710026	1	10382801	10384401
Kcnq5	MGI:1924937	1	21388484	21952023	1	21616001	21617601
Fam135a	MGI:1915437	1	24018522	24093413	1	24031801	24033401
Col19a1	MGI:1095415	1	24268729	24594311	1	24417201	24419401
Col19a1	MGI:1095415	1	24268729	24594311	1	24425401	24428801
Gm10222	MGI:3642643	1	24619243	24619539	1	24618801	24622801
Gm10925	MGI:3809095	1	24621347	24621490	1	24618801	24622801
Bai3	MGI:2441837	1	25124321	25886552	1	25289201	25291401
Bai3	MGI:2441837	1	25124321	25886552	1	25503401	25506401
4931408C20Rik	MGI:3588222	1	26738659	26744305	1	26743001	26745001
4931428L18Rik	MGI:1918238	1	31197923	31279506	1	31207201	31209001
4931428L18Rik	MGI:1918238	1	31197923	31279506	1	31226401	31229201
Gm3224	MGI:3781403	1	32123828	32125991	1	32119201	32125801
Khdrbs2	MGI:2159649	1	32229651	32714583	1	32321401	32325401
Khdrbs2	MGI:2159649	1	32229651	32714583	1	32328601	32330601
Khdrbs2	MGI:2159649	1	32229651	32714583	1	32434401	32435801
Khdrbs2	MGI:2159649	1	32229651	32714583	1	32663801	32665801
Gm2987	MGI:3781165	1	33176423	33297462	1	33191201	33194001
Gm2987	MGI:3781165	1	33176423	33297462	1	33205601	33207801
Gm2987	MGI:3781165	1	33176423	33297462	1	33238201	33242401
Gm2987	MGI:3781165	1	33176423	33297462	1	33252201	33255201
Gm2987	MGI:3781165	1	33176423	33297462	1	33290201	33291801
Prim2	MGI:97758	1	33510659	33726600	1	33588001	33590201
Prim2	MGI:97758	1	33510659	33726600	1	33607401	33609001
Prim2	MGI:97758	1	33510659	33726600	1	33611401	33612801
Gm11158	MGI:3779410	1	34428991	34460294	1	34456401	34458801
Gm3052	MGI:3781230	1	34472608	34474843	1	34470601	34472801
Tmem131	MGI:1927110	1	36849036	36996372	1	36966601	36972201
Gm11155	MGI:3779407	1	36968172	36975575	1	36966601	36972201
Vwa3b	MGI:1918103	1	37083441	37133841	1	37124001	37126001
Npas2	MGI:109232	1	39251049	39419031	1	39413401	39415201
Tbc1d8	MGI:1927225	1	39428345	39535580	1	39457001	39459201
Gulp1	MGI:1920407	1	44608356	44853678	1	44689801	44692401
Gulp1	MGI:1920407	1	44608356	44853678	1	44742801	44745001
Dnahc7b	MGI:2684953	1	46123583	46430395	1	46196801	46198601
Aox3l1	MGI:3529596	1	58335170	58436108	1	58379601	58382401
Aox3l1	MGI:3529596	1	58335170	58436108	1	58385801	58388001
Fam126b	MGI:1098784	1	58579650	58643167	1	58605801	58607801
Casp8	MGI:1261423	1	58852276	58903851	1	58867601	58871001
Casp8	MGI:1261423	1	58852276	58903851	1	58873201	58876401
Trak2	MGI:1918077	1	58957294	59003342	1	58987401	58989801
Trak2	MGI:1918077	1	58957294	59003342	1	58990401	58992601
Cdk15	MGI:3583944	1	59313750	59409837	1	59401601	59404401
Cdk15	MGI:3583944	1	59313750	59409837	1	59405801	59407801
Tns1	MGI:104552	1	73956805	74171021	1	74161801	74163601
Rhbdd1	MGI:1924117	1	82313027	82441941	1	82339801	82343201
Rhbdd1	MGI:1924117	1	82313027	82441941	1	82398401	82400401
Rhbdd1	MGI:1924117	1	82313027	82441941	1	82417201	82420801
Rhbdd1	MGI:1924117	1	82313027	82441941	1	82422801	82424801
Col4a3	MGI:104688	1	82583496	82718634	1	82671801	82673801
Gm6217	MGI:3644079	1	82927143	82931714	1	82928201	82940401
A030003K21Rik	MGI:1925163	1	82939132	82951441	1	82928201	82940401
C130026I21Rik	MGI:3612702	1	84989265	85267141	1	85001201	85008801
C130026I21Rik	MGI:3612702	1	84989265	85267141	1	85020601	85022601
C130026I21Rik	MGI:3612702	1	84989265	85267141	1	85022801	85029201
Gm7582	MGI:3643856	1	85022924	85038530	1	85022801	85029201
C130026I21Rik	MGI:3612702	1	84989265	85267141	1	85029401	85033601
Gm7582	MGI:3643856	1	85022924	85038530	1	85029401	85033601
C130026I21Rik	MGI:3612702	1	84989265	85267141	1	85039601	85042801
C130026I21Rik	MGI:3612702	1	84989265	85267141	1	85069601	85071201
C130026I21Rik	MGI:3612702	1	84989265	85267141	1	85082001	85087801
A530032D15Rik	MGI:3037746	1	85084714	85106428	1	85082001	85087801
C130026I21Rik	MGI:3612702	1	84989265	85267141	1	85092001	85095001
A530032D15Rik	MGI:3037746	1	85084714	85106428	1	85092001	85095001
C130026I21Rik	MGI:3612702	1	84989265	85267141	1	85096401	85102801
A530032D15Rik	MGI:3037746	1	85084714	85106428	1	85096401	85102801
A530040E14Rik	MGI:3612703	1	85102521	85110610	1	85096401	85102801
C130026I21Rik	MGI:3612702	1	84989265	85267141	1	85105201	85108401
A530032D15Rik	MGI:3037746	1	85084714	85106428	1	85105201	85108401
A530040E14Rik	MGI:3612703	1	85102521	85110610	1	85105201	85108401
Gm2397	MGI:3780565	1	85107922	85115098	1	85105201	85108401
C130026I21Rik	MGI:3612702	1	84989265	85267141	1	85136401	85139001
C130026I21Rik	MGI:3612702	1	84989265	85267141	1	85150601	85165001
C130026I21Rik	MGI:3612702	1	84989265	85267141	1	85177001	85180801
C130026I21Rik	MGI:3612702	1	84989265	85267141	1	85192001	85196801
C130026I21Rik	MGI:3612702	1	84989265	85267141	1	85201201	85204001
C130026I21Rik	MGI:3612702	1	84989265	85267141	1	85205401	85213401
C130026I21Rik	MGI:3612702	1	84989265	85267141	1	85227601	85296801
Gm11120	MGI:3779373	1	85256405	85257589	1	85227601	85296801
Gm2619	MGI:3780787	1	85310071	85323971	1	85301201	85310801
Gm2619	MGI:3780787	1	85310071	85323971	1	85313201	85318201
Gm2619	MGI:3780787	1	85310071	85323971	1	85319201	85331001
Gm2666	MGI:3780835	1	87380827	87381717	1	87378601	87390201
Gm2427	MGI:3780593	1	87386276	87411814	1	87378601	87390201
Gm2427	MGI:3780593	1	87386276	87411814	1	87394601	87397001
Gm2427	MGI:3780593	1	87386276	87411814	1	87399201	87401201
Gm7592	MGI:3644077	1	87423175	87465775	1	87420001	87426201
Gm7592	MGI:3644077	1	87423175	87465775	1	87438001	87444201
Gm7592	MGI:3644077	1	87423175	87465775	1	87446201	87450401
Gm7592	MGI:3644077	1	87423175	87465775	1	87458401	87464601
Gm7592	MGI:3644077	1	87423175	87465775	1	87465401	87467801
Sp110	MGI:1923364	1	87473474	87495392	1	87474601	87477001
Sp110	MGI:1923364	1	87473474	87495392	1	87477801	87499801
Sp140	MGI:3702467	1	87496953	87541612	1	87477801	87499801
Sp140	MGI:3702467	1	87496953	87541612	1	87500401	87507801
Gm10552	MGI:3642083	1	87500660	87547257	1	87500401	87507801
Sp140	MGI:3702467	1	87496953	87541612	1	87509401	87516401
Gm10552	MGI:3642083	1	87500660	87547257	1	87509401	87516401
Sp140	MGI:3702467	1	87496953	87541612	1	87517001	87522401
Gm10552	MGI:3642083	1	87500660	87547257	1	87517001	87522401
Sp140	MGI:3702467	1	87496953	87541612	1	87541401	87549201
Gm10552	MGI:3642083	1	87500660	87547257	1	87541401	87549201
Sp100	MGI:109561	1	87546563	87606573	1	87541401	87549201
Sp100	MGI:109561	1	87546563	87606573	1	87552401	87554201
Gm7133	MGI:3643070	1	99059437	99198851	1	99068001	99069801
Gm7133	MGI:3643070	1	99059437	99198851	1	99073801	99078401
Gm7133	MGI:3643070	1	99059437	99198851	1	99117801	99119401
Gm7135	MGI:3647710	1	99243006	99375579	1	99252001	99254001
Gm7135	MGI:3647710	1	99243006	99375579	1	99313401	99314801
Gm7135	MGI:3647710	1	99243006	99375579	1	99318801	99320601
Cntnap5b	MGI:3664583	1	101669342	102382519	1	101780401	101783201
Cntnap5b	MGI:3664583	1	101669342	102382519	1	101890401	101892401
Cntnap5b	MGI:3664583	1	101669342	102382519	1	102058201	102060401
Cntnap5b	MGI:3664583	1	101669342	102382519	1	102196001	102204001
Cdh20	MGI:1346069	1	106665106	106892058	1	106781601	106784601
Pign	MGI:1351629	1	107417723	107555585	1	107457801	107459201
Pign	MGI:1351629	1	107417723	107555585	1	107464001	107466001
Pign	MGI:1351629	1	107417723	107555585	1	107500801	107505201
Pign	MGI:1351629	1	107417723	107555585	1	107510401	107513201
Vps4b	MGI:1100499	1	108660648	108693305	1	108683201	108685201
Cdh7	MGI:2442792	1	111879008	112036734	1	111929601	111940801
Cdh19	MGI:3588198	1	112785772	112873949	1	112796201	112798801
Cdh19	MGI:3588198	1	112785772	112873949	1	112835601	112839401
Cntnap5a	MGI:3643623	1	117581333	118478603	1	118091001	118092401
Cntnap5a	MGI:3643623	1	117581333	118478603	1	118351201	118355001
Cntnap5a	MGI:3643623	1	117581333	118478603	1	118357401	118359001
B020011L13Rik	MGI:3588191	1	119677710	119699938	1	119672201	119698601
Mapkapk2	MGI:109298	1	132950281	132994120	1	132965001	132966601
Lrrn2	MGI:106037	1	134776850	134836582	1	134792201	134794801
Golt1a	MGI:1915588	1	135206400	135219603	1	135216401	135218601
Fam5c	MGI:2443035	1	148342759	148749601	1	148393001	148395001
Fam5c	MGI:2443035	1	148342759	148749601	1	148442801	148445201
Fam5c	MGI:2443035	1	148342759	148749601	1	148464401	148468801
Fam5c	MGI:2443035	1	148342759	148749601	1	148469001	148475401
Fam5c	MGI:2443035	1	148342759	148749601	1	148571001	148573201
Fam5c	MGI:2443035	1	148342759	148749601	1	148575601	148577801
Fam5c	MGI:2443035	1	148342759	148749601	1	148691401	148693401
BC003331	MGI:2385108	1	152208435	152240210	1	152223201	152229401
Tpr	MGI:1922066	1	152239968	152297062	1	152294001	152295801
Hmcn1	MGI:2685047	1	152409654	152840565	1	152683801	152685801
Hmcn1	MGI:2685047	1	152409654	152840565	1	152707801	152710201
Hmcn1	MGI:2685047	1	152409654	152840565	1	152743801	152745601
Hmcn1	MGI:2685047	1	152409654	152840565	1	152814001	152816601
Gm8947	MGI:3648958	1	153039504	153041184	1	153041001	153057801
Gm8951	MGI:3779826	1	153045534	153047211	1	153041001	153057801
3110040M04Rik	MGI:1920426	1	153051249	153052926	1	153041001	153057801
Gm4337	MGI:3782521	1	153057256	153058933	1	153041001	153057801
1200016B10Rik	MGI:1914125	1	153214829	153275585	1	153222801	153227401
Fam129a	MGI:2137237	1	153418316	153569069	1	153498201	153500201
Fam129a	MGI:2137237	1	153418316	153569069	1	153504201	153506201
1700025G04Rik	MGI:1916649	1	153737978	153853897	1	153818201	153821001
Glt25d2	MGI:2138232	1	154246960	154357825	1	154323801	154327801
Glt25d2	MGI:2138232	1	154246960	154357825	1	154328001	154331801
Npl	MGI:1921341	1	155350146	155396844	1	155367001	155369201
5830403L16Rik	MGI:1923273	1	155696672	155747338	1	155695201	155697801
Rasal2	MGI:2443881	1	159070665	159342726	1	159318601	159325201
4930562F17Rik	MGI:1922506	1	161065528	161096518	1	161077001	161079401
Rfwd2	MGI:1347046	1	161162457	161277711	1	161270801	161273201
Nos1ap	MGI:1917979	1	172232799	172519992	1	172355801	172357401
Nos1ap	MGI:1917979	1	172232799	172519992	1	172497001	172498801
Mark1	MGI:2664902	1	186721482	186823358	1	186803601	186806801
Ush2a	MGI:1341292	1	190085902	190788920	1	190509601	190511601
Ush2a	MGI:1341292	1	190085902	190788920	1	190747601	190749801
Hhat	MGI:2444681	1	194336710	194597407	1	194370201	194373201
Hhat	MGI:2444681	1	194336710	194597407	1	194452601	194457801
Hhat	MGI:2444681	1	194336710	194597407	1	194564201	194567001
Plxna2	MGI:107684	1	196446023	196643063	1	196479201	196484001
Cd46	MGI:1203290	1	196867479	196918442	1	196881801	196883201
Prpf18	MGI:1914479	2	4543104	4573159	2	4573001	4577001
Bend7	MGI:2443100	2	4638877	4723188	2	4663401	4667401
Camk1d	MGI:2442190	2	5214503	5635561	2	5540201	5542401
Cdc123	MGI:2138811	2	5715340	5766210	2	5726801	5728601
Celf2	MGI:1338822	2	6462915	7002348	2	6760601	6762601
Sfmbt2	MGI:2447794	2	10292137	10516880	2	10490201	10491801
Nsun6	MGI:1921705	2	14916758	14976511	2	14917801	14920001
Nsun6	MGI:1921705	2	14916758	14976511	2	14940801	14942801
Nsun6	MGI:1921705	2	14916758	14976511	2	14946601	14949001
Gm13318	MGI:3651283	2	15963753	16072433	2	16030001	16031601
Gm13318	MGI:3651283	2	15963753	16072433	2	16052401	16055401
Gm13318	MGI:3651283	2	15963753	16072433	2	16056001	16058401
Nebl	MGI:1921353	2	17265536	17653091	2	17533401	17535401
Nebl	MGI:1921353	2	17265536	17653091	2	17537401	17540001
Armc3	MGI:1918132	2	19120929	19231868	2	19151001	19154401
Armc3	MGI:1918132	2	19120929	19231868	2	19155601	19157401
Etl4	MGI:95454	2	19831407	20732340	2	19835801	19839001
Etl4	MGI:95454	2	19831407	20732340	2	20116801	20119001
Etl4	MGI:95454	2	19831407	20732340	2	20228201	20230201
Etl4	MGI:95454	2	19831407	20732340	2	20302001	20312201
Etl4	MGI:95454	2	19831407	20732340	2	20347201	20350401
Etl4	MGI:95454	2	19831407	20732340	2	20354201	20355801
Etl4	MGI:95454	2	19831407	20732340	2	20418801	20423401
Etl4	MGI:95454	2	19831407	20732340	2	20642001	20644801
Gad2	MGI:95634	2	22477725	22549394	2	22538601	22540801
Slc25a25	MGI:1915913	2	32270007	32306965	2	32282401	32285201
St6galnac6	MGI:1355316	2	32455229	32476326	2	32457801	32460401
Garnl3	MGI:2139309	2	32841886	32987174	2	32968001	32970601
C230014O12Rik	MGI:3045377	2	33873809	33966964	2	33929601	33931401
4930402F06Rik	MGI:1922104	2	35231082	35252695	2	35237001	35238401
Dab2ip	MGI:1916851	2	35413786	35586514	2	35417001	35418801
Dab2ip	MGI:1916851	2	35413786	35586514	2	35484601	35486601
Rabgap1	MGI:2385139	2	37298799	37421974	2	37316201	37317801
Dennd1a	MGI:2442794	2	37654511	38142910	2	37909001	37910601
Psmb7	MGI:107637	2	38443556	38499607	2	38454401	38455801
Lrp1b	MGI:2151136	2	40450768	42509118	2	41067401	41071201
Lrp1b	MGI:2151136	2	40450768	42509118	2	41074801	41077801
Gm3937	MGI:3782111	2	41073913	41076698	2	41074801	41077801
Lrp1b	MGI:2151136	2	40450768	42509118	2	41205401	41207201
Lrp1b	MGI:2151136	2	40450768	42509118	2	41549601	41554001
Arhgap15	MGI:1923367	2	43604344	44251473	2	43775601	43778001
Arhgap15	MGI:1923367	2	43604344	44251473	2	43927801	43929601
Lypd6	MGI:2443848	2	49921982	50049084	2	50015201	50017401
Lypd6	MGI:2443848	2	49921982	50049084	2	50018601	50020401
Mmadhc	MGI:1923786	2	50135401	50152321	2	50141401	50143801
Fmnl2	MGI:1918659	2	52716894	52992838	2	52937801	52943201
Prpf40a	MGI:1860512	2	52993738	53050318	2	53030801	53034401
Galnt13	MGI:2139447	2	54288728	54970720	2	54337801	54339601
Galnt13	MGI:2139447	2	54288728	54970720	2	54360001	54362201
Galnt13	MGI:2139447	2	54288728	54970720	2	54522801	54524801
Galnt13	MGI:2139447	2	54288728	54970720	2	54526601	54530401
Cytip	MGI:2183535	2	57981548	58047943	2	58017401	58022601
Gm13546	MGI:3649666	2	58016412	58029474	2	58017401	58022601
Acvr1	MGI:87911	2	58241055	58419568	2	58265001	58267201
Slc4a10	MGI:2150150	2	61884519	62164787	2	61936601	61938201
Kcnh7	MGI:2159566	2	62531471	63022344	2	62546601	62548601
Kcnh7	MGI:2159566	2	62531471	63022344	2	62740401	62742801
Rapgef4	MGI:1917723	2	71819297	72095531	2	71871801	71874001
Zfp385b	MGI:2444734	2	77248691	77657696	2	77468201	77470001
Cwc22	MGI:2136773	2	77719216	77784432	2	77707801	77757601
Cwc22	MGI:2136773	2	77719216	77784432	2	77758001	77789001
4930440I19Rik	MGI:1925408	2	77889234	78034587	2	77928601	77930401
4930440I19Rik	MGI:1925408	2	77889234	78034587	2	77967201	77969601
Gm13691	MGI:3702053	2	83830710	83833202	2	83828601	83831201
Ckap5	MGI:1923036	2	91366919	91460821	2	91380801	91382201
Gm10801	MGI:3641656	2	98502394	98504240	2	98502201	98507601
Gm10800	MGI:3641657	2	98506704	98507458	2	98502201	98507601
Ldlrad3	MGI:2138856	2	101790360	102026542	2	101835001	101839401
Pamr1	MGI:2445082	2	102390169	102483198	2	102395801	102399801
Slc1a2	MGI:101931	2	102498816	102630941	2	102549601	102551001
Cd44	MGI:88338	2	102651298	102741767	2	102710401	102712001
D430041D05Rik	MGI:2181743	2	103983230	104250150	2	104092201	104093801
D430041D05Rik	MGI:2181743	2	103983230	104250150	2	104175401	104177201
D430041D05Rik	MGI:2181743	2	103983230	104250150	2	104226201	104228401
Tcp11l1	MGI:2444263	2	104497445	104552326	2	104510601	104516001
Ccdc73	MGI:3606488	2	104707962	104858061	2	104735401	104738001
Elp4	MGI:1925016	2	105537477	105744721	2	105728601	105730401
Immp1l	MGI:1913791	2	105744795	105805715	2	105788001	105790001
Gm4415	MGI:3782600	2	105786254	105791147	2	105788001	105790001
Dcdc5	MGI:3045363	2	106062214	106246308	2	106072001	106074201
Mpped2	MGI:1924265	2	106533426	106708513	2	106655601	106659801
C130023O10Rik	MGI:2443634	2	106658215	106659689	2	106655601	106659801
Sema6d	MGI:2387661	2	123915705	124493506	2	124034601	124039001
Sema6d	MGI:2387661	2	123915705	124493506	2	124081201	124084001
Sema6d	MGI:2387661	2	123915705	124493506	2	124217801	124221601
Sema6d	MGI:2387661	2	123915705	124493506	2	124281401	124283401
Fbn1	MGI:95489	2	125126330	125333729	2	125230601	125232801
Fbn1	MGI:95489	2	125126330	125333729	2	125236401	125238801
Fbn1	MGI:95489	2	125126330	125333729	2	125257801	125260201
Pak7	MGI:1920334	2	135906840	136213703	2	135967801	135969801
Macrod2	MGI:1920149	2	140221045	142218702	2	141196801	141198801
Macrod2	MGI:1920149	2	140221045	142218702	2	141321201	141325201
Macrod2	MGI:1920149	2	140221045	142218702	2	141353601	141355401
Macrod2	MGI:1920149	2	140221045	142218702	2	141539001	141541601
Macrod2	MGI:1920149	2	140221045	142218702	2	141635401	141637801
Macrod2	MGI:1920149	2	140221045	142218702	2	141665801	141668601
Macrod2	MGI:1920149	2	140221045	142218702	2	141673401	141675601
Macrod2	MGI:1920149	2	140221045	142218702	2	141694401	141697401
Macrod2	MGI:1920149	2	140221045	142218702	2	141790601	141794001
Macrod2	MGI:1920149	2	140221045	142218702	2	141862601	141865601
Slc24a3	MGI:2137513	2	144993490	145467902	2	145455201	145459201
9030622O22Rik	MGI:1918820	2	147770476	147865939	2	147808601	147810601
Cst9	MGI:1340053	2	148660883	148664474	2	148662801	148664801
Tmem90b	MGI:3702158	2	149654947	149830128	2	149807201	149809801
Chmp4b	MGI:1922858	2	154477441	154520521	2	154490201	154493801
Chmp4b	MGI:1922858	2	154477441	154520521	2	154505401	154507801
a	MGI:87853	2	154617138	154876748	2	154743601	154746601
a	MGI:87853	2	154617138	154876748	2	154798401	154800001
a	MGI:87853	2	154617138	154876748	2	154807401	154809001
a	MGI:87853	2	154617138	154876748	2	154839801	154841601
a	MGI:87853	2	154617138	154876748	2	154853001	154856201
Cep250	MGI:108084	2	155782194	155824636	2	155801401	155803401
6430550D23Rik	MGI:2443361	2	155799015	155833713	2	155801401	155803401
Phf20	MGI:2444148	2	156022202	156135688	2	156036401	156038001
4922505G16Rik	MGI:3603828	2	157034286	157105285	2	157048201	157051001
4922505G16Rik	MGI:3603828	2	157034286	157105285	2	157067601	157070801
Ghrh	MGI:95709	2	157155233	157173242	2	157162401	157164601
Manbal	MGI:1916411	2	157193330	157222499	2	157207601	157212201
D630003M21Rik	MGI:3606579	2	158008269	158054958	2	158020001	158021801
1700060C20Rik	MGI:1920649	2	158017745	158021478	2	158020001	158021801
Gm14243	MGI:3651252	2	161004800	161042313	2	161033001	161035201
Ptprt	MGI:1321152	2	161347726	162486883	2	161799601	161801201
Ptprt	MGI:1321152	2	161347726	162486883	2	161815601	161817401
Ptprt	MGI:1321152	2	161347726	162486883	2	162198601	162201201
Gm11018	MGI:3779238	2	163429141	163520600	2	163473801	163475401
Wisp2	MGI:1328326	2	163646597	163658882	2	163658801	163663001
Elmo2	MGI:2153045	2	165113531	165151979	2	165125001	165127601
Atp9a	MGI:1330826	2	168459938	168567909	2	168489801	168492401
Pfdn4	MGI:1923512	2	170321928	170344623	2	170328001	170330601
Pfdn4	MGI:1923512	2	170321928	170344623	2	170338601	170341001
Gm6236	MGI:3779577	3	9860725	9960987	3	9926601	9928601
Ralyl	MGI:1924147	3	13776848	14143963	3	13821001	13823401
Ralyl	MGI:1924147	3	13776848	14143963	3	13825001	13827201
Car13	MGI:1931322	3	14641727	14663002	3	14656801	14658401
Gm9733	MGI:3780136	3	15296551	15332302	3	15299401	15302601
Gm9733	MGI:3780136	3	15296551	15332302	3	15305401	15308201
Sirpb1a	MGI:2444824	3	15371819	15426504	3	15362001	15375601
Sirpb1a	MGI:2444824	3	15371819	15426504	3	15379001	15381401
Sirpb1a	MGI:2444824	3	15371819	15426504	3	15383001	15432401
Sirpb1b	MGI:3779828	3	15495754	15575065	3	15493001	15507601
Sirpb1b	MGI:3779828	3	15495754	15575065	3	15511401	15517201
Sirpb1b	MGI:3779828	3	15495754	15575065	3	15520601	15548601
Sirpb1b	MGI:3779828	3	15495754	15575065	3	15575001	15578001
Sirpb1c	MGI:3807521	3	15695145	15748528	3	15693401	15709801
Sirpb1c	MGI:3807521	3	15695145	15748528	3	15710201	15748001
Gm5150	MGI:3779469	3	15848070	15906332	3	15853801	15857801
Gm5150	MGI:3779469	3	15848070	15906332	3	15863401	15866001
Gm5150	MGI:3779469	3	15848070	15906332	3	15866401	15868201
Gm5150	MGI:3779469	3	15848070	15906332	3	15871401	15874201
Gm5150	MGI:3779469	3	15848070	15906332	3	15875401	15885601
Gm5150	MGI:3779469	3	15848070	15906332	3	15886401	15889601
Gm2563	MGI:3780731	3	16131708	16618043	3	16242001	16244201
Gm2563	MGI:3780731	3	16131708	16618043	3	16260401	16262201
Gm2563	MGI:3780731	3	16131708	16618043	3	16278601	16283001
Gm2563	MGI:3780731	3	16131708	16618043	3	16310801	16312601
Gm2563	MGI:3780731	3	16131708	16618043	3	16355401	16357201
Gm2563	MGI:3780731	3	16131708	16618043	3	16360001	16363601
Gm2563	MGI:3780731	3	16131708	16618043	3	16390801	16392601
Gm2563	MGI:3780731	3	16131708	16618043	3	16477801	16480001
Spata16	MGI:1918112	3	26536542	26882134	3	26700601	26703001
Tnik	MGI:1916264	3	28162136	28574757	3	28247601	28250001
Gm1527	MGI:2686373	3	28791539	28825646	3	28804201	28806001
Lrriq4	MGI:1915557	3	30543429	30571353	3	30568401	30570401
Kcnmb2	MGI:1919663	3	31801429	32099102	3	31937801	31940001
Kcnmb2	MGI:1919663	3	31801429	32099102	3	32023001	32025001
Kcnmb2	MGI:1919663	3	31801429	32099102	3	32066001	32070801
Pik3ca	MGI:1206581	3	32296593	32365029	3	32316401	32323001
Gm6639	MGI:3779620	3	35518546	35565048	3	35522001	35525001
4932438A13Rik	MGI:2444631	3	36762043	36951955	3	36765201	36768001
4932438A13Rik	MGI:2444631	3	36762043	36951955	3	36810201	36813801
Intu	MGI:2443752	3	40430208	40508696	3	40485001	40486401
Ccrn4l	MGI:109382	3	51028369	51055566	3	51043001	51045401
Ccrn4l	MGI:109382	3	51028369	51055566	3	51047801	51050401
Naa15	MGI:1922088	3	51220048	51277946	3	51239201	51240801
Clrn1	MGI:2388124	3	58647950	58689262	3	58661801	58663401
Med12l	MGI:2139916	3	58810645	59118668	3	59088801	59091401
4930449A18Rik	MGI:1921922	3	59581731	59643841	3	59600201	59603001
4930449A18Rik	MGI:1921922	3	59581731	59643841	3	59606201	59608801
Veph1	MGI:1920039	3	65860557	66100741	3	65990001	65992201
Ppm1l	MGI:2139740	3	69120783	69364724	3	69335801	69338201
Pdgfc	MGI:1859631	3	80840338	81017962	3	80880401	80882001
Pdgfc	MGI:1859631	3	80840338	81017962	3	80920401	80923201
Pdgfc	MGI:1859631	3	80840338	81017962	3	80995401	80997601
D930015E06Rik	MGI:2443399	3	83702209	83844083	3	83703001	83705201
D930015E06Rik	MGI:2443399	3	83702209	83844083	3	83707601	83711401
Mnd1	MGI:1924165	3	83891856	83959708	3	83910001	83911401
Lrba	MGI:1933162	3	86028612	86586615	3	86093401	86095801
Lrba	MGI:1933162	3	86028612	86586615	3	86211401	86213401
Lrba	MGI:1933162	3	86028612	86586615	3	86324201	86328201
Fcrl5	MGI:3053558	3	87239704	87271446	3	87271201	87274201
Kcnn3	MGI:2153183	3	89324086	89471683	3	89325601	89327401
4930558C23Rik	MGI:1914904	3	95190380	95206763	3	95199001	95201001
4930558C23Rik	MGI:1914904	3	95190380	95206763	3	95204001	95206401
Ctsk	MGI:107823	3	95303208	95313284	3	95301401	95304001
Ctss	MGI:107341	3	95330708	95360322	3	95359601	95362001
Syt6	MGI:1859544	3	103379154	103449490	3	103382001	103384401
Syt6	MGI:1859544	3	103379154	103449490	3	103394201	103400001
Lrig2	MGI:2443718	3	104257907	104315779	3	104264601	104266801
1700061I17Rik	MGI:1920612	3	116769830	116780683	3	116770201	116772601
Alg14	MGI:1914039	3	120994735	121064929	3	121055201	121058601
Abca4	MGI:109424	3	121747361	121882979	3	121868001	121870001
Fnbp1l	MGI:1925642	3	122241637	122322585	3	122312801	122314801
Arsj	MGI:2443513	3	126066770	126143292	3	126137601	126139001
Slc39a8	MGI:1914797	3	135488243	135551532	3	135507601	135509001
Bank1	MGI:2442120	3	135716327	135989010	3	135814801	135817001
Ppp3ca	MGI:107164	3	136333088	136600691	3	136584801	136586801
Emcn	MGI:1891716	3	137004031	137095149	3	137057001	137058801
Gm2475	MGI:3780642	3	142680630	142703645	3	142687401	142689601
Gm2475	MGI:3780642	3	142680630	142703645	3	142693401	142696201
Gm6260	MGI:3645891	3	143333854	143375107	3	143357201	143359601
Cryz	MGI:88527	3	154259675	154286146	3	154271401	154273401
Negr1	MGI:2444846	3	156224758	156979409	3	156687001	156689201
Negr1	MGI:2444846	3	156224758	156979409	3	156761601	156763601
Lrrc69	MGI:1920564	4	14550767	14723207	4	14559001	14560801
Lrrc69	MGI:1920564	4	14550767	14723207	4	14565401	14567401
Gm2571	MGI:3780738	4	14772219	14773063	4	14769601	14772401
Necab1	MGI:1916602	4	14879392	15076941	4	15019201	15021201
Nkain3	MGI:2444830	4	20046021	20706013	4	20231601	20233801
Nkain3	MGI:2444830	4	20046021	20706013	4	20287201	20290401
Nkain3	MGI:2444830	4	20046021	20706013	4	20335601	20340401
Gm3009	MGI:3781187	4	30828265	30925711	4	30833001	30835401
Gabrr2	MGI:95626	4	33149974	33182840	4	33168801	33171601
Lingo2	MGI:2442298	4	35654655	36898780	4	36815601	36819401
Ccl21b	MGI:1349182	4	41774204	41775337	4	41774001	41782201
Gm10598	MGI:3711244	4	41902019	41906852	4	41903401	41905001
Gm2438	MGI:3780605	4	41924280	41938942	4	41926201	41931201
Gm3892	MGI:3782065	4	41925875	41960431	4	41926201	41931201
Gm2438	MGI:3780605	4	41924280	41938942	4	41935601	41944201
Gm3892	MGI:3782065	4	41925875	41960431	4	41935601	41944201
Gm2442	MGI:3780609	4	41941854	41943487	4	41935601	41944201
Gm3892	MGI:3782065	4	41925875	41960431	4	41949401	41952201
Gm3892	MGI:3782065	4	41925875	41960431	4	41958201	41963401
Gm3893	MGI:3782066	4	41961930	41963010	4	41958201	41963401
Gm13304	MGI:3710514	4	41985540	41986640	4	41983601	41992801
Gm13306	MGI:3713752	4	42024159	42029562	4	42025801	42031801
Gm13305	MGI:3801997	4	42029565	42039326	4	42025801	42031801
Gm13305	MGI:3801997	4	42029565	42039326	4	42032001	42034401
Gm2478	MGI:3780645	4	42087631	42090601	4	42087001	42091601
Gm10595	MGI:3641751	4	42090151	42090576	4	42087001	42091601
Gm2023	MGI:3780192	4	42248431	42250498	4	42247601	42255401
Gm2091	MGI:3780258	4	42269495	42271067	4	42264401	42270801
Gm2002	MGI:3780172	4	42339260	42349021	4	42340601	42343801
Gm2002	MGI:3780172	4	42339260	42349021	4	42344201	42350201
Gm2506	MGI:3780673	4	42349029	42354382	4	42344201	42350201
Gm2506	MGI:3780673	4	42349029	42354382	4	42353801	42360401
Ccl21c	MGI:1891386	4	42391950	42393080	4	42384601	42395201
Gm2537	MGI:3780705	4	42439644	42454306	4	42434001	42440001
Gm2542	MGI:3780710	4	42536112	42541707	4	42537201	42540601
Gm6389	MGI:3643815	4	42564415	42579081	4	42567201	42570801
Gm10593	MGI:3710526	4	42566010	42600570	4	42567201	42570801
Gm6389	MGI:3643815	4	42564415	42579081	4	42578201	42582201
Gm10593	MGI:3710526	4	42566010	42600570	4	42578201	42582201
Gm10593	MGI:3710526	4	42566010	42600570	4	42598401	42603401
Gm2163	MGI:3780332	4	42602069	42603149	4	42598401	42603401
Gm10591	MGI:3711256	4	42625653	42626784	4	42626401	42631201
Gm2564	MGI:3708691	4	42643230	42645246	4	42641401	42649601
Ccl27b	MGI:1891389	4	42664172	42669525	4	42667801	42673201
Il11ra2	MGI:109123	4	42669533	42679294	4	42667801	42673201
Il11ra2	MGI:109123	4	42669533	42679294	4	42674801	42678201
4930578G10Rik	MGI:1923202	4	42749077	42859120	4	42747601	42754201
4930578G10Rik	MGI:1923202	4	42749077	42859120	4	42762201	42769001
Ccl19	MGI:1346316	4	42768057	42770109	4	42762201	42769001
4930578G10Rik	MGI:1923202	4	42749077	42859120	4	42803801	42806601
Gm12394	MGI:3649790	4	42795460	42869643	4	42803801	42806601
Rnf38	MGI:1920719	4	44139082	44246661	4	44206001	44207401
Coro2a	MGI:1345966	4	46549815	46615074	4	46586601	46599201
Gm3249	MGI:3781427	4	53906591	53999946	4	53954201	53958801
Fkbp15	MGI:2444782	4	61961376	62021582	4	61977801	61980001
Frmd3	MGI:2442466	4	73659346	73848118	4	73821001	73823601
Frmd3	MGI:2442466	4	73659346	73848118	4	73823801	73826601
Ptprd	MGI:97812	4	75587143	77857865	4	75799001	75801001
Ptprd	MGI:97812	4	75587143	77857865	4	76010001	76011801
Ptprd	MGI:97812	4	75587143	77857865	4	76138801	76141201
Ptprd	MGI:97812	4	75587143	77857865	4	77049401	77051401
Ptprd	MGI:97812	4	75587143	77857865	4	77191001	77192401
Ptprd	MGI:97812	4	75587143	77857865	4	77225201	77234801
Ptprd	MGI:97812	4	75587143	77857865	4	77240601	77243001
Ptprd	MGI:97812	4	75587143	77857865	4	77265001	77267401
Ptprd	MGI:97812	4	75587143	77857865	4	77330401	77338201
Slc24a2	MGI:1923626	4	86629028	86876381	4	86744201	86746201
Slc24a2	MGI:1923626	4	86629028	86876381	4	86862601	86864201
Dock7	MGI:1914549	4	98603366	98787551	4	98780401	98782601
Ror1	MGI:1347520	4	99768396	100117370	4	100027401	100029801
Pde4b	MGI:99557	4	101760148	102279864	4	101838801	101840601
Pde4b	MGI:99557	4	101760148	102279864	4	101906801	101909201
Pde4b	MGI:99557	4	101760148	102279864	4	102007001	102008801
Dab1	MGI:108554	4	103291964	104417449	4	103419801	103422401
Dab1	MGI:108554	4	103291964	104417449	4	103917401	103919601
Dab1	MGI:108554	4	103291964	104417449	4	103941401	103942801
Gm1027	MGI:2685873	4	106353022	106403530	4	106357201	106360801
Acot11	MGI:1913736	4	106417160	106477603	4	106423001	106424401
Glis1	MGI:2386723	4	107107196	107307666	4	107151601	107154001
Glis1	MGI:2386723	4	107107196	107307666	4	107178001	107180401
Scp2	MGI:98254	4	107716444	107817603	4	107817601	107819801
Faf1	MGI:109419	4	109349193	109636565	4	109370001	109372601
Elavl4	MGI:107427	4	109876327	110024514	4	109993201	109995601
Agbl4	MGI:1918244	4	110070266	111336929	4	110943201	110947601
Gm2744	MGI:3780913	4	110945020	110945693	4	110943201	110947601
Agbl4	MGI:1918244	4	110070266	111336929	4	111230401	111232201
Agbl4	MGI:1918244	4	110070266	111336929	4	111248201	111250601
Skint4	MGI:2444425	4	111744621	111840681	4	111736201	111777001
Skint4	MGI:2444425	4	111744621	111840681	4	111780401	111873001
Skint3	MGI:3045331	4	111904850	111973073	4	111876001	112016201
Skint9	MGI:3045341	4	112058574	112106590	4	112021801	112095001
Skint9	MGI:3045341	4	112058574	112106590	4	112099001	112124001
Skint2	MGI:3649629	4	112286202	112320445	4	112221001	112290001
Skint2	MGI:3649629	4	112286202	112320445	4	112302401	112304201
Skint10	MGI:2685416	4	112383752	112447471	4	112427201	112429201
Skint6	MGI:3649262	4	112908844	112959568	4	112884401	112946201
Skint6	MGI:3649262	4	112908844	112959568	4	112949401	113024201
Skint5	MGI:3650151	4	113613249	113672102	4	113538401	113616401
Skint5	MGI:3650151	4	113613249	113672102	4	113619601	113624601
Skint5	MGI:3650151	4	113613249	113672102	4	113625401	113628201
Skint5	MGI:3650151	4	113613249	113672102	4	113635201	113638001
Skint5	MGI:3650151	4	113613249	113672102	4	113641001	113644601
Skint5	MGI:3650151	4	113613249	113672102	4	113645201	113648601
Skint5	MGI:3650151	4	113613249	113672102	4	113665801	113667601
Skint11	MGI:2685415	4	113835989	113917633	4	113841801	113848801
Skint11	MGI:2685415	4	113835989	113917633	4	113852801	113856601
Skint11	MGI:2685415	4	113835989	113917633	4	113868601	113870601
Skint11	MGI:2685415	4	113835989	113917633	4	113877201	113883801
Skint11	MGI:2685415	4	113835989	113917633	4	113890401	113896201
Skint11	MGI:2685415	4	113835989	113917633	4	113902201	113906601
Skint11	MGI:2685415	4	113835989	113917633	4	113908601	113919201
Ipp	MGI:96581	4	116180157	116210848	4	116201401	116203201
Rnf220	MGI:1913993	4	116944068	117169657	4	117034801	117036601
St3gal3	MGI:1316659	4	117604759	117807519	4	117775601	117777801
Rimkla	MGI:3040686	4	119137888	119165233	4	119149201	119151201
Hivep3	MGI:106589	4	119406389	119810650	4	119456601	119458401
Hivep3	MGI:106589	4	119406389	119810650	4	119583201	119586001
Hivep3	MGI:106589	4	119406389	119810650	4	119781801	119786601
Scmh1	MGI:1352762	4	120077886	120202791	4	120110601	120115801
Rhbdl2	MGI:3608413	4	123465117	123507147	4	123496201	123498801
Nipal3	MGI:1921802	4	135001335	135050953	4	135012401	135014601
Pax7	MGI:97491	4	139292977	139388883	4	139342801	139348401
Gm694	MGI:2685540	4	140988587	140992020	4	140992001	140994201
Pdpn	MGI:103098	4	142857334	142889467	4	142880201	142884601
Ctnnbip1	MGI:1915756	4	148892345	148940546	4	148904001	148905801
Kcnab2	MGI:109239	4	151764851	151851980	4	151840201	151841801
Ajap1	MGI:2685419	4	152747330	152856939	4	152760601	152763001
BC039966	MGI:3039570	4	153321742	153324612	4	153320401	153322601
Megf6	MGI:1919351	4	153544839	153649822	4	153552601	153554801
Arhgef16	MGI:2446219	4	153652595	153675785	4	153675601	153678001
Abcb1a	MGI:97570	5	8660077	8748575	5	8710401	8712601
9330182L06Rik	MGI:2443264	5	9266118	9481825	5	9303201	9305601
9330182L06Rik	MGI:2443264	5	9266118	9481825	5	9340201	9342201
9330182L06Rik	MGI:2443264	5	9266118	9481825	5	9400801	9402801
9330182L06Rik	MGI:2443264	5	9266118	9481825	5	9407001	9409401
9330182L06Rik	MGI:2443264	5	9266118	9481825	5	9412201	9414601
9330182L06Rik	MGI:2443264	5	9266118	9481825	5	9426001	9428601
9330182L06Rik	MGI:2443264	5	9266118	9481825	5	9430401	9433401
Gm10482	MGI:3644444	5	10187866	10237890	5	10208801	10212401
Sema3d	MGI:1860118	5	12383556	12587058	5	12473001	12475401
Sema3d	MGI:1860118	5	12383556	12587058	5	12478001	12480201
Sema3d	MGI:1860118	5	12383556	12587058	5	12493401	12495201
Gm10354	MGI:3809109	5	14974503	14978935	5	14971001	15001801
Speer4d	MGI:2668869	5	15124882	15129682	5	15120401	15128601
Galnt11	MGI:2444392	5	24728700	24771736	5	24738201	24742201
Actr3b	MGI:2661120	5	25265815	25356160	5	25319201	25325801
Gm1979	MGI:3780148	5	26323148	26331338	5	26323601	26325601
Dpp6	MGI:94921	5	27143743	28054045	5	27691201	27692801
Dnajb6	MGI:1344381	5	30062228	30113018	5	30103401	30105601
Gpr113	MGI:2685887	5	30519971	30532262	5	30532001	30534601
Sorcs2	MGI:1932289	5	36359829	36740788	5	36511601	36514401
Sorcs2	MGI:1932289	5	36359829	36740788	5	36581001	36583401
Jakmip1	MGI:1923321	5	37438671	37539255	5	37464001	37466201
Tbc1d1	MGI:1889508	5	64547544	64742721	5	64731801	64735801
Gm3521	MGI:3781698	5	66228871	66262728	5	66242001	66244201
9130230L23Rik	MGI:3041166	5	66370597	66395524	5	66370401	66372601
9130230L23Rik	MGI:3041166	5	66370597	66395524	5	66383601	66386401
Apbb2	MGI:108405	5	66690100	67010067	5	66882801	66892201
Shisa3	MGI:3041225	5	67999122	68014791	5	68006201	68008801
Lphn3	MGI:2441950	5	81449163	82254158	5	82056401	82061801
Gnrhr	MGI:95790	5	86609779	86626926	5	86618601	86621401
Gm7714	MGI:3646267	5	88697944	88711860	5	88707001	88709001
Gm2521	MGI:3780688	5	88852242	88852640	5	88850401	88855601
Slc4a4	MGI:1927555	5	89315843	89668678	5	89407401	89408801
Slc4a4	MGI:1927555	5	89315843	89668678	5	89444801	89447201
Slc4a4	MGI:1927555	5	89315843	89668678	5	89614801	89617801
Slc4a4	MGI:1927555	5	89315843	89668678	5	89632001	89633801
Gc	MGI:95669	5	89846549	89886790	5	89874601	89876401
Npffr2	MGI:1860130	5	89956454	90012765	5	89973801	89975801
Npffr2	MGI:1860130	5	89956454	90012765	5	89978601	89981001
Adamts3	MGI:3045353	5	90105946	90312431	5	90240001	90242601
Gm10426	MGI:3642470	5	90807679	90807894	5	90805801	90807801
Gm16427	MGI:3704103	5	93910849	93914418	5	93911801	93923401
C87414	MGI:2141341	5	94064019	94100577	5	94063201	94068201
Gm7792	MGI:3704104	5	94281097	94284656	5	94284001	94302401
Gm16429	MGI:3704105	5	94353803	94358078	5	94348201	94358801
Gm16522	MGI:4360987	5	94731544	94735821	5	94732401	94738201
Gm3139	MGI:3781318	5	94955309	94968473	5	94965801	94968601
Gm3147	MGI:3781326	5	95041094	95045367	5	95028401	95147801
Gm6509	MGI:3779602	5	95053038	95055771	5	95028401	95147801
Gm6523	MGI:3779604	5	95206896	95210006	5	95194601	95228201
Gm3183	MGI:3781362	5	95294521	95307501	5	95290801	95299801
Gm3183	MGI:3781362	5	95294521	95307501	5	95302201	95339001
Gm7942	MGI:3646599	5	95537068	95540177	5	95524201	95573201
Gm16513	MGI:2141041	5	95611623	95624586	5	95603401	95614401
Gm16513	MGI:2141041	5	95611623	95624586	5	95614801	95617601
Gm16513	MGI:2141041	5	95611623	95624586	5	95620201	95656401
Gm10424	MGI:3704250	5	95697512	95701787	5	95693401	95710801
Gm6468	MGI:3646666	5	95709481	95711989	5	95693401	95710801
Gm3259	MGI:3781437	5	95734834	95772936	5	95712801	95750201
Gm3259	MGI:3781437	5	95734834	95772936	5	95750401	95753601
Gm3259	MGI:3781437	5	95734834	95772936	5	95755801	95807001
Gm7963	MGI:3643214	5	95854546	95857656	5	95842601	95889001
D5Ertd577e	MGI:1261918	5	95885825	95914583	5	95842601	95889001
D5Ertd577e	MGI:1261918	5	95885825	95914583	5	95898001	95905801
D5Ertd577e	MGI:1261918	5	95885825	95914583	5	95907801	95923801
Gm3286	MGI:3781464	5	95947694	95950987	5	95929001	95973601
Gm7971	MGI:3779772	5	96019618	96023894	5	96016201	96029801
E330014E10Rik	MGI:3615333	5	96204889	96233734	5	96221201	96223601
E330014E10Rik	MGI:3615333	5	96204889	96233734	5	96229201	96234401
Antxr2	MGI:1919164	5	98313707	98459981	5	98349801	98351201
A930011G23Rik	MGI:2442790	5	99726263	100161738	5	99900401	99902401
Hsd17b13	MGI:2140804	5	104384459	104406429	5	104384801	104386401
Gm3162	MGI:3781341	5	104668332	104700005	5	104683001	104686201
Pkd2	MGI:1099818	5	104888469	104934838	5	104905201	104907001
Pkd2	MGI:1099818	5	104888469	104934838	5	104925001	104927601
Zfp33b	MGI:1916873	5	105000731	105012344	5	105006601	105010201
C230055K05Rik	MGI:2441896	5	105242188	105288830	5	105236801	105244001
C230055K05Rik	MGI:2441896	5	105242188	105288830	5	105261001	105262601
C230055K05Rik	MGI:2441896	5	105242188	105288830	5	105265001	105268801
C230055K05Rik	MGI:2441896	5	105242188	105288830	5	105271401	105274801
C230055K05Rik	MGI:2441896	5	105242188	105288830	5	105283001	105288401
Brdt	MGI:1891374	5	107760178	107816077	5	107809601	107811201
Fam69a	MGI:1914516	5	108337072	108416104	5	108355201	108358601
Pde6b	MGI:97525	5	108817410	108861416	5	108818401	108820201
Pde6b	MGI:97525	5	108817410	108861416	5	108838201	108841001
Gak	MGI:2442153	5	108998430	109058758	5	109022801	109024401
Gm3432	MGI:3781610	5	109323598	109390640	5	109366201	109370601
Golga3	MGI:96958	5	110605720	110655489	5	110628001	110629601
Abcb9	MGI:1861729	5	124511539	124545807	5	124534801	124537601
Aacs	MGI:1926144	5	125956184	125997782	5	125978201	125980001
Aacs	MGI:1926144	5	125956184	125997782	5	125985801	125988201
Tmem132b	MGI:3609245	5	126007235	126269921	5	126194801	126198201
Tmem132b	MGI:3609245	5	126007235	126269921	5	126201401	126204601
Tmem132c	MGI:2443061	5	127722178	128046163	5	127789201	127791201
Tmem132c	MGI:2443061	5	127722178	128046163	5	127978801	127980601
Glt1d1	MGI:2442755	5	128112632	128189124	5	128165801	128167201
Tmem132d	MGI:3044963	5	128263861	128938937	5	128792201	128794001
Sfswap	MGI:101760	5	130007106	130077258	5	130076601	130079201
Caln1	MGI:2155987	5	130845346	131316515	5	131202201	131204401
Auts2	MGI:1919847	5	131913205	133019214	5	132086801	132089201
Auts2	MGI:1919847	5	131913205	133019214	5	132655601	132658401
Auts2	MGI:1919847	5	131913205	133019214	5	132788801	132794201
Emid2	MGI:2155345	5	137217629	137359079	5	137308001	137311801
Emid2	MGI:2155345	5	137217629	137359079	5	137341801	137343801
Flt1	MGI:95558	5	148373180	148537587	5	148416001	148418001
Thsd7a	MGI:2685683	6	12267087	12699410	6	12472201	12473801
Gm2796	MGI:3780965	6	13402133	13411684	6	13400401	13402601
Gm2796	MGI:3780965	6	13402133	13411684	6	13410001	13411801
B630005N14Rik	MGI:2141466	6	13578647	13627966	6	13598001	13600801
St7	MGI:1927450	6	17642933	17893025	6	17715401	17717801
Cttnbp2	MGI:1353467	6	18316478	18465338	6	18438801	18440801
Cadps2	MGI:2443963	6	23212773	23789420	6	23303601	23305201
Cadps2	MGI:2443963	6	23212773	23789420	6	23553601	23556001
Smo	MGI:108075	6	29685694	29711365	6	29697601	29699201
Plxna4	MGI:2179061	6	32095926	32538192	6	32470601	32473001
Chchd3	MGI:1913325	6	32740976	33010260	6	32750601	32753001
Chchd3	MGI:1913325	6	32740976	33010260	6	32779401	32784401
Exoc4	MGI:1096376	6	33199085	33923979	6	33353201	33360401
Exoc4	MGI:1096376	6	33199085	33923979	6	33551001	33552801
Exoc4	MGI:1096376	6	33199085	33923979	6	33580201	33582601
Exoc4	MGI:1096376	6	33199085	33923979	6	33698401	33699801
Exoc4	MGI:1096376	6	33199085	33923979	6	33706001	33708201
Bpgm	MGI:1098242	6	34426207	34455613	6	34450801	34454001
Dgki	MGI:2443430	6	36796022	37250184	6	37176601	37178801
Cntnap2	MGI:1914047	6	45010060	47251368	6	45050001	45052201
Gm5875	MGI:3647376	6	52459878	52464030	6	52459401	52460801
Grid2	MGI:95813	6	63205870	64618276	6	63515201	63516801
Grid2	MGI:95813	6	63205870	64618276	6	63534801	63537201
Grid2	MGI:95813	6	63205870	64618276	6	63546801	63548801
Grid2	MGI:95813	6	63205870	64618276	6	63623601	63626201
Gm10019	MGI:3642552	6	70648805	70672950	6	70623001	70654601
Lrrtm4	MGI:2389180	6	79968871	80760137	6	80709401	80711201
Mgll	MGI:1346042	6	88674406	88778354	6	88733801	88736001
Mcm2	MGI:105380	6	88833469	88848694	6	88847401	88849801
Gm4272	MGI:3782449	6	89126124	89131295	6	89129601	89132201
Gm6507	MGI:3645279	6	89134666	89136019	6	89134401	89137201
Gm6511	MGI:3645589	6	89154081	89155527	6	89145201	89162401
Gm839	MGI:2685685	6	89161159	89166231	6	89145201	89162401
Magi1	MGI:1203522	6	93628030	94233316	6	93957001	93959201
Fam19a1	MGI:2443695	6	96063148	96607192	6	96588201	96590401
Gm765	MGI:2685611	6	98188071	98292666	6	98280601	98282201
Gm7865	MGI:3779768	6	98457720	98647619	6	98616801	98618201
Gxylt2	MGI:2682940	6	100654728	100755075	6	100697401	100700001
Pdzrn3	MGI:1933157	6	101099603	101327891	6	101189601	101192001
Pdzrn3	MGI:1933157	6	101099603	101327891	6	101283001	101286201
Gm9871	MGI:3647145	6	101724243	101751976	6	101749801	101755201
Cntn3	MGI:99534	6	102113300	102414661	6	102402401	102404401
Chl1	MGI:1098266	6	103460870	103683029	6	103530401	103533001
Cntn6	MGI:1858223	6	104442784	104813400	6	104800801	104804601
Gm4379	MGI:3782564	6	105485938	105739128	6	105575001	105577801
Gm4379	MGI:3782564	6	105485938	105739128	6	105630601	105632401
Cntn4	MGI:1095737	6	105627654	106649304	6	105630601	105632401
Cntn4	MGI:1095737	6	105627654	106649304	6	106259201	106261201
Cntn4	MGI:1095737	6	105627654	106649304	6	106264801	106266201
Cntn4	MGI:1095737	6	105627654	106649304	6	106271001	106272801
Cntn4	MGI:1095737	6	105627654	106649304	6	106346801	106349001
Cntn4	MGI:1095737	6	105627654	106649304	6	106584201	106586201
Lrrn1	MGI:106038	6	107479777	107520204	6	107505201	107507001
Rad18	MGI:1890476	6	112569844	112646680	6	112602201	112603801
Srgap3	MGI:2152938	6	112667965	112897260	6	112858401	112861201
Arpc4	MGI:1915339	6	113328109	113340442	6	113332201	113334401
Atp2b2	MGI:105368	6	113695663	113992607	6	113939601	113942401
BC060267	MGI:2681834	6	115760914	115788430	6	115779001	115781001
Ift122	MGI:1932386	6	115803488	115876717	6	115818601	115822601
D6Wsu116e	MGI:106463	6	116158075	116212683	6	116199801	116203001
Rassf4	MGI:2386853	6	116583026	116623809	6	116598201	116601801
8430408G22Rik	MGI:1918730	6	116600717	116602812	6	116598201	116601801
Tmem72	MGI:2442707	6	116642648	116666931	6	116653201	116656001
Rasgef1a	MGI:1917977	6	117961392	118041564	6	118002201	118004401
Zfp248	MGI:1919970	6	118377337	118405546	6	118385401	118390601
Atp6v1e1	MGI:894326	6	120745262	120772703	6	120761001	120764001
Atp6v1e1	MGI:894326	6	120745262	120772703	6	120766401	120768001
Pik3c2g	MGI:1203730	6	139664382	139917807	6	139715601	139718001
Pik3c2g	MGI:1203730	6	139664382	139917807	6	139764601	139766401
Pik3c2g	MGI:1203730	6	139664382	139917807	6	139768401	139770001
Pik3c2g	MGI:1203730	6	139664382	139917807	6	139779401	139781001
Pik3c2g	MGI:1203730	6	139664382	139917807	6	139818801	139821401
Pik3c2g	MGI:1203730	6	139664382	139917807	6	139830401	139833201
Pik3c2g	MGI:1203730	6	139664382	139917807	6	139886201	139890001
Gm2010	MGI:3780179	6	140248354	140308205	6	140269601	140271801
Gm2010	MGI:3780179	6	140248354	140308205	6	140274201	140276401
Plekha5	MGI:1923802	6	140372620	140543427	6	140393401	140395801
Plekha5	MGI:1923802	6	140372620	140543427	6	140475001	140476601
Plekha5	MGI:1923802	6	140372620	140543427	6	140519601	140521801
Aebp2	MGI:1338038	6	140570970	140626993	6	140607201	140609401
Gm11077	MGI:3779304	6	140677805	140704574	6	140684201	140686801
Gm11077	MGI:3779304	6	140677805	140704574	6	140690401	140697001
Slco1c1	MGI:1889679	6	141472907	141518241	6	141511801	141513801
Slco1b2	MGI:1351899	6	141578039	141635167	6	141594401	141596001
St8sia1	MGI:106011	6	142770065	142912972	6	142837201	142839001
St8sia1	MGI:106011	6	142770065	142912972	6	142845001	142846801
D6Ertd474e	MGI:1196315	6	143194408	143245792	6	143214401	143216801
Sox5	MGI:98367	6	143776945	144730497	6	144339801	144341801
Bcat1	MGI:104861	6	144942355	145024704	6	144975001	144977201
Itpr2	MGI:99418	6	146056821	146450745	6	146199201	146202601
Itpr2	MGI:99418	6	146056821	146450745	6	146312601	146315201
Itpr2	MGI:99418	6	146056821	146450745	6	146318001	146319601
Ppfibp1	MGI:1914783	6	146837009	146980547	6	146856001	146857601
Ccdc91	MGI:1914265	6	147424393	147581134	6	147436201	147438201
Ccdc91	MGI:1914265	6	147424393	147581134	6	147472201	147474601
Gm2384	MGI:3780552	6	147591561	147626133	6	147624601	147627001
Lilrb3	MGI:894311	7	3663011	3671993	7	3668801	3675801
Gm15448	MGI:3705216	7	3768383	3777289	7	3776801	3781001
Pira2	MGI:1195970	7	3788659	3796653	7	3796601	3806001
Pira4	MGI:1195988	7	3789755	3849722	7	3796601	3806001
Pira5	MGI:1195975	7	3789755	3849722	7	3796601	3806001
Pira4	MGI:1195988	7	3789755	3849722	7	3811801	3818601
Pira5	MGI:1195975	7	3789755	3849722	7	3811801	3818601
Pira4	MGI:1195988	7	3789755	3849722	7	3819401	3824001
Pira5	MGI:1195975	7	3789755	3849722	7	3819401	3824001
Vmn1r60	MGI:3645244	7	5490908	5498753	7	5486801	5501401
Vmn1r64	MGI:3033480	7	5835182	5836144	7	5833201	5835201
Zfp78	MGI:107783	7	6316043	6335315	7	6325601	6328201
Zim2	MGI:1923887	7	6604459	6615117	7	6605801	6611201
Zfp772	MGI:2385265	7	7154833	7162709	7	7160801	7164001
Vmn2r29	MGI:1923479	7	7166473	7192861	7	7176801	7179601
Vmn2r29	MGI:1923479	7	7166473	7192861	7	7181401	7190601
Vmn2r30	MGI:1316729	7	7264434	7290242	7	7262201	7271401
Vmn2r30	MGI:1316729	7	7264434	7290242	7	7275201	7279801
Vmn2r30	MGI:1316729	7	7264434	7290242	7	7281001	7288601
Gm3554	MGI:3781731	7	7312678	7315071	7	7306601	7444001
Gm3912	MGI:3782085	7	7315609	7327335	7	7306601	7444001
Vmn2r31	MGI:3757688	7	7336741	7349472	7	7306601	7444001
Vmn2r32	MGI:1316696	7	7415738	7432800	7	7306601	7444001
Vmn2r33	MGI:3757694	7	7503402	7519537	7	7487401	7525401
Vmn2r34	MGI:3757700	7	7623988	7642224	7	7627201	7655001
Vmn2r35	MGI:3646200	7	7738588	7772618	7	7766401	7775201
Vmn2r36	MGI:3757866	7	7828805	7855288	7	7837801	7844201
Vmn2r36	MGI:3757866	7	7828805	7855288	7	7850401	7858001
Gm3956	MGI:3782130	7	8062819	8089272	7	8066801	8069801
Gm3956	MGI:3782130	7	8062819	8089272	7	8070001	8078201
Gm3956	MGI:3782130	7	8062819	8089272	7	8078401	8080401
Gm3956	MGI:3782130	7	8062819	8089272	7	8083201	8092601
Gm3991	MGI:3782165	7	8557157	8583640	7	8554001	8563401
Gm3991	MGI:3782165	7	8557157	8583640	7	8568801	8576601
Gm3991	MGI:3782165	7	8557157	8583640	7	8580601	8584801
Vmn2r37	MGI:1316711	7	8954257	8972355	7	8951801	8973401
Gm5583	MGI:3646061	7	9046767	9061104	7	9030601	9057601
Vmn2r38	MGI:3757869	7	9079992	9103276	7	9074001	9093801
Vmn2r39	MGI:3704108	7	9147119	9163358	7	9125801	9250001
Vmn2r40	MGI:3757872	7	9246337	9270665	7	9125801	9250001
Vmn2r40	MGI:3757872	7	9246337	9270665	7	9252801	9271601
Gm3644	MGI:3781820	7	9327233	9329627	7	9306201	9338401
Vmn2r45	MGI:3757883	7	9638195	9656739	7	9622001	9662401
Vmn2r44	MGI:3643088	7	9744040	9760130	7	9682601	9772601
Gm7696	MGI:3649133	7	9769212	9776255	7	9682601	9772601
Gm10303	MGI:3642900	7	9774107	9820158	7	9815801	9821401
Gm3654	MGI:3781830	7	9835626	9844689	7	9835001	9952001
Vmn2r43	MGI:3037819	7	9866727	9882979	7	9835001	9952001
Vmn2r42	MGI:1316666	7	9927007	9944065	7	9835001	9952001
Vmn2r41	MGI:3757876	7	9965677	9989982	7	9953201	9969601
Vmn2r41	MGI:3757876	7	9965677	9989982	7	9972201	9991001
Gm4082	MGI:3782257	7	10034293	10041283	7	10025601	10054601
Gm3670	MGI:3781846	7	10046523	10048914	7	10025601	10054601
Vmn2r47	MGI:3757929	7	10401183	10426790	7	10403001	10409401
Vmn2r47	MGI:3757929	7	10401183	10426790	7	10413601	10416401
Vmn2r47	MGI:3757929	7	10401183	10426790	7	10425601	10428001
2810047C21Rik1	MGI:1919966	7	10455317	10462312	7	10447001	10471801
Vmn2r48	MGI:3647749	7	10512973	10538925	7	10514001	10517401
Vmn2r48	MGI:3647749	7	10512973	10538925	7	10519201	10533801
Vmn2r48	MGI:3647749	7	10512973	10538925	7	10535001	10613601
Vmn2r49	MGI:3757933	7	10560652	10577604	7	10535001	10613601
Vmn2r50	MGI:3643086	7	10622317	10635663	7	10615401	10658801
Nlrp4b	MGI:3056570	7	11273142	11315517	7	11312801	11316001
Zscan4e	MGI:3643613	7	11891727	11896031	7	11889601	11896001
Vmn1r72	MGI:2182256	7	12254948	12255868	7	12237201	12255601
1810019N24Rik	MGI:1916336	7	13533940	13547131	7	13534801	13536601
Vmn1r90	MGI:3612342	7	15146518	15208415	7	15168201	15170201
Gm8040	MGI:3647077	7	15385143	15396199	7	15386601	15390401
Gm8040	MGI:3647077	7	15385143	15396199	7	15392001	15399001
Gm9545	MGI:3779955	7	15550579	15572398	7	15553001	15556601
Gm9545	MGI:3779955	7	15550579	15572398	7	15568001	15570401
Gm3959	MGI:3782133	7	15591759	15593370	7	15587801	15601401
Gm8072	MGI:3643193	7	15641545	15643153	7	15634801	15662001
Gm3968	MGI:3782142	7	15709499	15715462	7	15701601	15721201
Gm3977	MGI:3782150	7	15724895	15726833	7	15722201	15732001
Gm3980	MGI:3782153	7	15736263	15738201	7	15733601	15860401
Gm3981	MGI:3782154	7	15747593	15749531	7	15733601	15860401
Gm3984	MGI:3782157	7	15758674	15760612	7	15733601	15860401
Gm3987	MGI:3782160	7	15770015	15771953	7	15733601	15860401
Gm3989	MGI:3782163	7	15781328	15783224	7	15733601	15860401
Gm3994	MGI:3782168	7	15792659	15794597	7	15733601	15860401
Gm3996	MGI:3782170	7	15803989	15805927	7	15733601	15860401
Gm3998	MGI:3782172	7	15815293	15817231	7	15733601	15860401
Gm4001	MGI:3782175	7	15826621	15828559	7	15733601	15860401
Gm4003	MGI:3782177	7	15837960	15839898	7	15733601	15860401
Gm4016	MGI:3782190	7	16076788	16088118	7	16071601	16085601
Gm4016	MGI:3782190	7	16076788	16088118	7	16087201	16100801
Obox3	MGI:2149032	7	16210740	16213211	7	16204401	16214201
Gm4023	MGI:3782197	7	16276998	16278931	7	16274201	16279601
Crxos1	MGI:2451355	7	16467966	16489358	7	16475801	16477601
Gpr77	MGI:2442013	7	16820101	16827667	7	16825801	16827201
Ceacam9	MGI:1347247	7	17307278	17311459	7	17311001	17315001
Gm5155	MGI:3647191	7	18457116	18504373	7	18481801	18484601
Psg23	MGI:1891355	7	19191809	19201850	7	19179001	19193001
Ccdc61	MGI:2685005	7	19476232	19495764	7	19486401	19488201
2210010C17Rik	MGI:1917330	7	20522654	20536092	7	20533401	20536001
Ceacam20	MGI:1918851	7	20550780	20576462	7	20553601	20556201
Nlrp9b	MGI:2675377	7	20593372	20658655	7	20655201	20658201
Vmn1r91	MGI:3649070	7	20685282	20687430	7	20687201	20690201
Gm6164	MGI:3647652	7	20790033	20792784	7	20791201	20795601
Vmn1r109	MGI:3782702	7	21336572	21358986	7	21338001	21341801
Vmn1r121	MGI:3648662	7	21882495	21884610	7	21880401	21888001
Vmn1r122	MGI:3647341	7	21918230	21920358	7	21903801	21923401
Vmn1r123	MGI:2686292	7	21945268	21948127	7	21932601	21983601
Vmn1r124	MGI:3779910	7	22044713	22045636	7	22039201	22067601
Vmn1r125	MGI:3704112	7	22057198	22058121	7	22039201	22067601
Vmn1r132	MGI:3647009	7	22379150	22400150	7	22374001	22379401
Vmn1r132	MGI:3647009	7	22379150	22400150	7	22380401	22382801
Vmn1r157	MGI:3646139	7	23545352	23547771	7	23547601	23550601
Vmn1r158	MGI:3646143	7	23574878	23577983	7	23564001	23596801
Vmn1r159	MGI:3642763	7	23627707	23628624	7	23613601	23632801
Vmn1r160	MGI:3779564	7	23654307	23657166	7	23637601	23679601
Nlrp4e	MGI:3056600	7	24086294	24147289	7	24092001	24093801
Nlrp4e	MGI:3056600	7	24086294	24147289	7	24116001	24118401
Nlrp5	MGI:1345193	7	24170908	24226941	7	24179601	24184001
Zfp94	MGI:107610	7	25086723	25101685	7	25094001	25096601
Chst8	MGI:1916197	7	35459487	35597730	7	35566601	35569801
1600014C10Rik	MGI:1919494	7	38968835	38979989	7	38960801	38980801
Pop4	MGI:1913411	7	39047839	39056367	7	39053801	39055601
Gm6605	MGI:3644762	7	39231315	39237190	7	39198401	39278401
Gm5591	MGI:3648692	7	39303158	39313212	7	39280801	39339201
Gm4454	MGI:3782638	7	39351859	39356187	7	39350401	39355001
Gm1988	MGI:3780157	7	46425170	46435208	7	46403001	46545801
Gm6124	MGI:3779556	7	46474468	46480344	7	46403001	46545801
Gm16387	MGI:3646111	7	46511994	46519904	7	46403001	46545801
Gm6833	MGI:3645553	7	46562898	46572951	7	46554801	46567801
Gm6833	MGI:3645553	7	46562898	46572951	7	46569601	46573201
Gm9271	MGI:3646449	7	46617645	46623502	7	46612601	46634401
Gm6866	MGI:3646160	7	48465535	48474629	7	48469001	48470601
Gm6871	MGI:3643456	7	48792732	48803387	7	48791401	48793601
Siglece	MGI:1932475	7	50906442	50915515	7	50913401	50920001
Aldh16a1	MGI:1916998	7	52396054	52409954	7	52394201	52397001
Nell1	MGI:2443902	7	57230234	58120625	7	57626201	57628801
Nell1	MGI:2443902	7	57230234	58120625	7	57636801	57639001
Nell1	MGI:2443902	7	57230234	58120625	7	57841401	57843401
Nell1	MGI:2443902	7	57230234	58120625	7	57868601	57873601
Gabrg3	MGI:95624	7	63971835	64642558	7	64176801	64181201
Gm7339	MGI:3779732	7	67012079	67039437	7	67002201	67049601
Pcsk6	MGI:102897	7	73007099	73195220	7	73186401	73188201
Lrrk1	MGI:2142227	7	73403631	73533236	7	73458201	73467601
Klhl25	MGI:2668031	7	82993283	83012377	7	83003801	83007401
Agbl1	MGI:3646469	7	83462958	83911494	7	83580801	83583201
Agbl1	MGI:3646469	7	83462958	83911494	7	83608801	83610801
Agbl1	MGI:3646469	7	83462958	83911494	7	83668601	83674401
Agbl1	MGI:3646469	7	83462958	83911494	7	83687001	83688801
Agbl1	MGI:3646469	7	83462958	83911494	7	83903201	83905801
Ntrk3	MGI:97385	7	85337248	85723294	7	85530801	85532401
Acan	MGI:99602	7	86198369	86259985	7	86227801	86229801
P2ry2	MGI:105107	7	108145086	108160505	7	108157401	108159601
Stim1	MGI:107476	7	109416338	109585374	7	109427601	109430201
Stim1	MGI:107476	7	109416338	109585374	7	109490401	109493401
Rrm1	MGI:98180	7	109590381	109617440	7	109617401	109625401
Olfr543	MGI:3030377	7	109625372	109626382	7	109617401	109625401
Olfr559	MGI:3030393	7	109872046	109873002	7	109867001	109872801
Olfr559	MGI:3030393	7	109872046	109873002	7	109873001	109878201
Olfr564	MGI:3030398	7	109951994	109952987	7	109950201	109955601
Dub2a	MGI:3051372	7	110398251	110401019	7	110399801	110407801
Olfr597	MGI:3030431	7	110468915	110469874	7	110467001	110471001
Gm5736	MGI:3645277	7	110987659	110988941	7	110986401	110989001
Hbb-y	MGI:96027	7	111000259	111001754	7	110996601	111001601
Olfr635	MGI:3030469	7	111127690	111128655	7	111126401	111128401
Olfr639	MGI:3030473	7	111160264	111161214	7	111158001	111160601
E030002O03Rik	MGI:2443346	7	111301527	111313345	7	111301801	111310201
Trim34-1	MGI:2137359	7	111392973	111489207	7	111405001	111407401
Trim34-1	MGI:2137359	7	111392973	111489207	7	111408601	111412801
Trim5	MGI:3646853	7	111411900	111436608	7	111408601	111412801
Trim34-1	MGI:2137359	7	111392973	111489207	7	111480401	111484601
Gm15134	MGI:3805550	7	111448744	111485423	7	111480401	111484601
Trim34-1	MGI:2137359	7	111392973	111489207	7	111485001	111487201
Gm15134	MGI:3805550	7	111448744	111485423	7	111485001	111487201
Trim34-1	MGI:2137359	7	111392973	111489207	7	111487401	111489201
Trim12-2	MGI:4821183	7	111487268	111501876	7	111487401	111489201
Trim30-1	MGI:4821256	7	111503896	111518398	7	111509801	111513401
Trim79	MGI:3035181	7	111618528	111656363	7	111636801	111638801
Trim79	MGI:3035181	7	111618528	111656363	7	111641001	111643201
Trim79	MGI:3035181	7	111618528	111656363	7	111643401	111651001
Trim79	MGI:3035181	7	111618528	111656363	7	111652601	111655201
Dub3	MGI:107697	7	111916674	111921467	7	111919001	111925801
Cnga4	MGI:2664099	7	112553082	112557252	7	112550801	112553201
Gm4070	MGI:3782245	7	113043632	113102484	7	113058401	113060401
Gm4070	MGI:3782245	7	113043632	113102484	7	113093001	113094601
Gm1966	MGI:3584360	7	113744757	113770578	7	113758601	113766601
Gm10081	MGI:3647188	7	114247824	114250373	7	114250001	114263001
Syt9	MGI:1926373	7	114514242	114692170	7	114600601	114602801
Syt9	MGI:1926373	7	114514242	114692170	7	114614401	114616201
Syt9	MGI:1926373	7	114514242	114692170	7	114620801	114622601
Gm4199	MGI:3782376	7	115236698	115238099	7	115226801	115244001
Olfr482	MGI:3030316	7	115238111	115239082	7	115226801	115244001
Olfr486	MGI:3030320	7	115315312	115316256	7	115305201	115360001
Olfr487	MGI:3030321	7	115355097	115356041	7	115305201	115360001
Olfr503	MGI:3030337	7	115688041	115689012	7	115688801	115693801
Eif3f	MGI:1913335	7	116077931	116086465	7	116077801	116080401
Stk33	MGI:2152419	7	116422737	116582595	7	116433401	116435401
Scube2	MGI:1928765	7	116942204	117009193	7	116953201	116955201
Scube2	MGI:1928765	7	116942204	117009193	7	116988401	116991601
Phxr5	MGI:104521	7	116988530	116990548	7	116988401	116991601
Sbf2	MGI:1921831	7	117452860	117758436	7	117479001	117481001
Sbf2	MGI:1921831	7	117452860	117758436	7	117626001	117628801
Sbf2	MGI:1921831	7	117452860	117758436	7	117641801	117652401
Mrvi1	MGI:1338023	7	118011780	118125975	7	118067601	118070001
Spon1	MGI:2385287	7	120909512	121186884	7	121023001	121026201
Jmjd5	MGI:1924285	7	132588190	132605779	7	132604201	132607601
Gsg1l	MGI:2685483	7	133024217	133225925	7	133195401	133198001
Gdpd3	MGI:1915866	7	133909928	133919157	7	133915801	133918401
Myst1	MGI:1915023	7	135056031	135069276	7	135065401	135067001
Itgam	MGI:96607	7	135206154	135271674	7	135266801	135271201
Fgfr2	MGI:95523	7	137305965	140315033	7	138630601	138632601
Fank1	MGI:1914180	7	140968544	141073215	7	141002201	141005001
Dock1	MGI:2429765	7	141862370	142365322	7	141947001	141949001
Dock1	MGI:2429765	7	141862370	142365322	7	142248201	142249601
Inpp5a	MGI:2686961	7	146575008	146765551	7	146708601	146710201
Cln8	MGI:1349447	8	14881335	14901720	8	14884001	14885801
Rab11fip1	MGI:1923017	8	28249245	28285120	8	28271001	28273001
Tex24	MGI:1921539	8	28454866	28459659	8	28453001	28456801
Gm3985	MGI:3782158	8	33998977	34060498	8	34001801	34012001
Gm6876	MGI:3647691	8	34125161	34182427	8	34129601	34131201
Wrn	MGI:109635	8	34346172	34495969	8	34407401	34409401
Wrn	MGI:109635	8	34346172	34495969	8	34431201	34433801
Rbpms	MGI:1334446	8	34893116	35040313	8	34971801	34973801
Rbpms	MGI:1334446	8	34893116	35040313	8	35002401	35004801
Gm2745	MGI:3780914	8	56197122	56198699	8	56198401	56209001
Gm2749	MGI:3780918	8	56200420	56201997	8	56198401	56209001
Gm5927	MGI:3644093	8	56203724	56205648	8	56198401	56209001
Gm10674	MGI:3644111	8	56208108	56208614	8	56198401	56209001
Gm1153	MGI:2685999	8	57977384	57978904	8	57976601	57979001
Gm7373	MGI:3645936	8	57996505	57998072	8	57995001	57997601
Galntl6	MGI:1913581	8	60906291	61390424	8	60940001	60944801
Galntl6	MGI:1913581	8	60906291	61390424	8	60967201	60973401
Galntl6	MGI:1913581	8	60906291	61390424	8	60975001	60979801
Galntl6	MGI:1913581	8	60906291	61390424	8	61055401	61058401
Galntl6	MGI:1913581	8	60906291	61390424	8	61127201	61129601
Galntl6	MGI:1913581	8	60906291	61390424	8	61294201	61297201
Galntl6	MGI:1913581	8	60906291	61390424	8	61308601	61312201
36951	MGI:1920175	8	68141799	68995536	8	68148601	68151201
36951	MGI:1920175	8	68141799	68995536	8	68234001	68236201
36951	MGI:1920175	8	68141799	68995536	8	68350601	68352601
36951	MGI:1920175	8	68141799	68995536	8	68448001	68450601
36951	MGI:1920175	8	68141799	68995536	8	68452201	68455001
36951	MGI:1920175	8	68141799	68995536	8	68459401	68462001
36951	MGI:1920175	8	68141799	68995536	8	68828201	68830201
36951	MGI:1920175	8	68141799	68995536	8	68893801	68895401
D130040H23Rik	MGI:2444324	8	71794979	71827274	8	71815001	71816601
Gatad2a	MGI:2384585	8	72432369	72520263	8	72485801	72490201
Olfr372	MGI:3030206	8	74581581	74582506	8	74578401	74582801
Large	MGI:1342270	8	75338498	75877439	8	75438601	75440601
Large	MGI:1342270	8	75338498	75877439	8	75491001	75493401
Nfix	MGI:97311	8	87223775	87324243	8	87284401	87287201
Phkb	MGI:97578	8	88364858	88585275	8	88436601	88438001
Fto	MGI:1347093	8	93837431	94192338	8	94087801	94089801
Fto	MGI:1347093	8	93837431	94192338	8	94093801	94096001
Ces1	MGI:88378	8	95826268	95861207	8	95843001	95846601
Tmco7	MGI:2142786	8	109206968	109375339	8	109205201	109207001
Tmco7	MGI:2142786	8	109206968	109375339	8	109309201	109311001
Pkd1l3	MGI:2664670	8	112138417	112196492	8	112188401	112190801
Phlpp2	MGI:2444928	8	112392442	112468571	8	112437601	112440001
2310061C15Rik	MGI:1913781	8	119412585	119445355	8	119419601	119421201
2310061C15Rik	MGI:1913781	8	119412585	119445355	8	119426001	119428201
Atmin	MGI:2682328	8	119467308	119484344	8	119470401	119475201
Pkd1l2	MGI:2664668	8	119519579	119606349	8	119529201	119532201
Pkd1l2	MGI:2664668	8	119519579	119606349	8	119542601	119544201
Pkd1l2	MGI:2664668	8	119519579	119606349	8	119574401	119576801
Cdh13	MGI:99551	8	120807633	121848821	8	121574801	121577001
Galnt2	MGI:894694	8	122434741	126869624	8	124358001	124360401
Galnt2	MGI:894694	8	122434741	126869624	8	124362401	124364401
Galnt2	MGI:894694	8	122434741	126869624	8	125950201	125958001
Gm11168	MGI:3779420	9	3004457	3005837	9	3004401	3038401
Gm10721	MGI:3641688	9	3013170	3014344	9	3004401	3038401
Gm10720	MGI:3641687	9	3015654	3017210	9	3004401	3038401
Gm10719	MGI:3641690	9	3017408	3019022	9	3004401	3038401
Gm11167	MGI:3779419	9	3020108	3021593	9	3004401	3038401
Gm10718	MGI:3642028	9	3023547	3025218	9	3004401	3038401
Gm10717	MGI:3642031	9	3025417	3026387	9	3004401	3038401
Gm10716	MGI:3641972	9	3030099	3031071	9	3004401	3038401
Gm10106	MGI:3642872	9	3032085	3032822	9	3004401	3038401
Gm10715	MGI:3642376	9	3037111	3038316	9	3004401	3038401
Fat3	MGI:2444314	9	15714649	16182675	9	16090001	16091801
Olfr850	MGI:3030684	9	19281745	19282692	9	19280801	19282401
Npsr1	MGI:2441738	9	23902440	24120842	9	23945201	23947001
Npsr1	MGI:2441738	9	23902440	24120842	9	23947201	23950001
Npsr1	MGI:2441738	9	23902440	24120842	9	23951801	23953601
Npsr1	MGI:2441738	9	23902440	24120842	9	23961601	23965601
Npsr1	MGI:2441738	9	23902440	24120842	9	23977001	23979401
Npsr1	MGI:2441738	9	23902440	24120842	9	24077001	24079001
Gm10701	MGI:3642532	9	24146101	24223153	9	24151201	24153001
Dpy19l1	MGI:1915685	9	24216220	24307584	9	24283801	24285601
Dpy19l2	MGI:2444662	9	24361497	24500737	9	24379201	24381201
Dpy19l2	MGI:2444662	9	24361497	24500737	9	24424601	24426601
Tbx20	MGI:1888496	9	24527648	24578746	9	24532401	24534001
Pknox2	MGI:2445415	9	36698570	36954899	9	36808001	36809801
Gm3898	MGI:3809204	9	43629030	43851847	9	43663401	43666601
Phldb1	MGI:2143230	9	44494387	44543281	9	44503601	44506401
Tipin	MGI:1921571	9	64129414	64152599	9	64152201	64153801
Megf11	MGI:1920951	9	64233433	64557012	9	64257601	64260601
Megf11	MGI:1920951	9	64233433	64557012	9	64264201	64266601
Megf11	MGI:1920951	9	64233433	64557012	9	64294201	64297801
Tln2	MGI:1917799	9	67065943	67387422	9	67135201	67137001
Gm2679	MGI:3780848	9	67407144	67547969	9	67428001	67429601
Myo5a	MGI:105976	9	74918822	75071495	9	74929801	74931201
Mrap2	MGI:3609239	9	87039141	87078880	9	87070601	87072201
Clstn2	MGI:1929897	9	97344814	97933600	9	97700601	97702401
Esyt3	MGI:1098699	9	99210386	99258949	9	99226601	99228001
Stag1	MGI:1098658	9	100498217	100858964	9	100694601	100696201
Stag1	MGI:1098658	9	100498217	100858964	9	100800601	100802201
Ppp2r3a	MGI:2442104	9	101007617	101115498	9	101070801	101072401
Ephb1	MGI:1096337	9	101824458	102257023	9	101844601	101846201
9630041A04Rik	MGI:3045242	9	101840811	101845549	9	101844601	101846201
Ephb1	MGI:1096337	9	101824458	102257023	9	101992401	101994801
Nek11	MGI:2442276	9	105064797	105297854	9	105282401	105284201
Atp2c1	MGI:1889008	9	105313692	105397429	9	105384601	105389201
Rnf123	MGI:2148796	9	107953865	107985677	9	107956601	107958801
Amigo3	MGI:2444854	9	107955490	107958032	9	107956601	107958801
Ltf	MGI:96837	9	110921796	110945270	9	110930601	110932801
Dclk3	MGI:3039580	9	111341585	111392112	9	111353601	111356401
4930545L08Rik	MGI:1925278	9	111814815	111821170	9	111813601	111815801
Glb1	MGI:88151	9	114310237	114383495	9	114324801	114326601
Gm2315	MGI:3780486	9	115256593	115303644	9	115272001	115275201
Gadl1	MGI:1920998	9	115818573	115983465	9	115967601	115970201
Tgfbr2	MGI:98729	9	115996825	116084407	9	116003601	116005801
Rbms3	MGI:2444477	9	116486714	117161261	9	117049001	117051001
Rbms3	MGI:2444477	9	116486714	117161261	9	117112801	117115001
Zcwpw2	MGI:1921888	9	117833430	117923278	9	117895801	117907001
Syne1	MGI:1927152	10	4795849	5326338	10	4974201	4976401
Ust	MGI:2442406	10	7924551	8238623	10	8183401	8185601
Utrn	MGI:104631	10	12101986	12581533	10	12161801	12164401
Pex3	MGI:1929646	10	13243653	13272945	10	13253601	13255801
Txlnb	MGI:2671945	10	17516086	17565469	10	17529601	17532201
Txlnb	MGI:2671945	10	17516086	17565469	10	17539201	17541601
D10Bwg1379e	MGI:106387	10	18307817	18463564	10	18388001	18391401
Il20ra	MGI:3605069	10	19432393	19479859	10	19473801	19475201
Ahi1	MGI:87971	10	20672470	20800235	10	20766801	20768401
Gm2503	MGI:3780670	10	21463673	21466812	10	21462401	21463801
4930444G20Rik	MGI:2149738	10	21786398	21787885	10	21782801	21786801
E030030I06Rik	MGI:2442914	10	21833938	21868629	10	21802201	21836401
E030030I06Rik	MGI:2442914	10	21833938	21868629	10	21838201	21841001
E030030I06Rik	MGI:2442914	10	21833938	21868629	10	21850801	21860001
E030030I06Rik	MGI:2442914	10	21833938	21868629	10	21866001	21868801
Raet1c	MGI:109431	10	21878375	22093945	10	21876401	21879801
Raet1c	MGI:109431	10	21878375	22093945	10	21905201	21916001
Raet1c	MGI:109431	10	21878375	22093945	10	21922201	21927601
Raet1c	MGI:109431	10	21878375	22093945	10	21928201	21932001
Raet1c	MGI:109431	10	21878375	22093945	10	21934201	21951601
Gm2555	MGI:3780723	10	21936313	21938830	10	21934201	21951601
Raet1c	MGI:109431	10	21878375	22093945	10	21954401	21961201
Raet1c	MGI:109431	10	21878375	22093945	10	21984601	21987601
Raet1c	MGI:109431	10	21878375	22093945	10	21995401	22033801
H60b	MGI:3649078	10	21993152	22008655	10	21995401	22033801
Raet1c	MGI:109431	10	21878375	22093945	10	22041801	22117801
Raet1d	MGI:1861032	10	22082077	22093945	10	22041801	22117801
Gm10825	MGI:3704351	10	22124487	22124816	10	22124001	22141401
Slc2a12	MGI:3052471	10	22364817	22424091	10	22402601	22404601
Slc2a12	MGI:3052471	10	22364817	22424091	10	22406201	22411201
Slc2a12	MGI:3052471	10	22364817	22424091	10	22411401	22414401
Akap7	MGI:1859150	10	24889928	25018969	10	24933201	24936001
Akap7	MGI:1859150	10	24889928	25018969	10	24950401	24954201
Epb4.1l2	MGI:103009	10	25161393	25232886	10	25193601	25195801
Grik2	MGI:95815	10	48819266	49508572	10	48994801	48996801
Grik2	MGI:95815	10	48819266	49508572	10	49268201	49269801
Grik2	MGI:95815	10	48819266	49508572	10	49280801	49286401
Grik2	MGI:95815	10	48819266	49508572	10	49467001	49470201
Grik2	MGI:95815	10	48819266	49508572	10	49475401	49478001
Gm6996	MGI:3644596	10	52248326	52249846	10	52247801	52249401
Dux	MGI:3703875	10	57685720	57686274	10	57685801	57688801
Ctnna3	MGI:2661445	10	62892846	64466415	10	64082001	64088201
Ctnna3	MGI:2661445	10	62892846	64466415	10	64097401	64099801
Ctnna3	MGI:2661445	10	62892846	64466415	10	64262401	64264201
Ctnna3	MGI:2661445	10	62892846	64466415	10	64270001	64272001
Ctnna3	MGI:2661445	10	62892846	64466415	10	64293601	64297001
Rtkn2	MGI:2158417	10	67442318	67522488	10	67492201	67494601
Bicc1	MGI:1933388	10	70385580	70622448	10	70474801	70477401
Bicc1	MGI:1933388	10	70385580	70622448	10	70480001	70482601
Bicc1	MGI:1933388	10	70385580	70622448	10	70573001	70577401
Pcdh15	MGI:1891428	10	72562090	74112482	10	72656401	72658401
Gm6763	MGI:3643573	10	103605569	103608038	10	103602601	103638001
Gm8764	MGI:3643666	10	103614079	103616547	10	103602601	103638001
Gm8766	MGI:3643661	10	103622588	103625055	10	103602601	103638001
Gm4340	MGI:3782524	10	103631097	103633576	10	103602601	103638001
Acss3	MGI:2685720	10	106402138	106560724	10	106420001	106421601
Ptprq	MGI:1096349	10	106954416	107157083	10	107053001	107059001
Gm6924	MGI:3647600	10	107199366	107349211	10	107282001	107284201
Trhde	MGI:2384311	10	113835879	114239363	10	114225001	114231001
Tph2	MGI:2651811	10	114515697	114622078	10	114534201	114536601
Tph2	MGI:2651811	10	114515697	114622078	10	114537401	114540001
Lgr5	MGI:1341817	10	114887367	115024836	10	114964001	114965601
Mdm1	MGI:96951	10	117578888	117606053	10	117592001	117593601
Mdm1	MGI:96951	10	117578888	117606053	10	117597201	117599601
Iltifb	MGI:2151139	10	117726685	117732094	10	117724201	117761601
D930020B18Rik	MGI:2442001	10	121078644	121129948	10	121100201	121102201
Ppm1h	MGI:2442087	10	122115818	122382851	10	122358201	122359801
Usp15	MGI:101857	10	122550300	122633979	10	122573401	122575601
Fam19a2	MGI:2143691	10	122701132	123178032	10	122742001	122743801
Fam19a2	MGI:2143691	10	122701132	123178032	10	122745201	122747801
Fam19a2	MGI:2143691	10	122701132	123178032	10	122837801	122839601
Fam19a2	MGI:2143691	10	122701132	123178032	10	122965201	122970201
Gm4154	MGI:3782330	10	124924562	124927295	10	124922401	124925201
Xrcc6bp1	MGI:1916984	10	126305486	126338389	10	126315401	126317601
Olfr784	MGI:3030618	10	128824691	128825650	10	128825001	128826401
Sfi1	MGI:1926137	11	3031853	3093466	11	3032601	3035401
Hormad2	MGI:1923078	11	4245817	4341108	11	4276401	4278001
Hormad2	MGI:1923078	11	4245817	4341108	11	4307201	4309001
Ascc2	MGI:1922702	11	4537750	4585702	11	4563601	4567801
Sun3	MGI:3041199	11	8916057	8948994	11	8926001	8928801
Abca13	MGI:2388707	11	9091945	9584262	11	9344401	9347201
Cobl	MGI:105056	11	12136679	12364862	11	12141201	12143001
Cobl	MGI:105056	11	12136679	12364862	11	12330201	12332601
Ehbp1	MGI:2667252	11	21905831	22242295	11	22196001	22198601
Ehbp1	MGI:2667252	11	21905831	22242295	11	22232201	22234001
B3gnt2	MGI:1889505	11	22679269	22760488	11	22738001	22740201
Commd1	MGI:109474	11	22734744	22882382	11	22738001	22740201
Gm12665	MGI:3652165	11	24803983	24826058	11	24814401	24816801
5730522E02Rik	MGI:1917876	11	25502763	26110763	11	25512201	25514401
5730522E02Rik	MGI:1917876	11	25502763	26110763	11	25932001	25934801
Fancl	MGI:1914280	11	26286135	26371876	11	26344201	26346401
Vrk2	MGI:1917172	11	26371322	26493999	11	26408801	26411001
Acyp2	MGI:1922822	11	30405991	30549587	11	30536201	30543401
Slit3	MGI:1315202	11	34934726	35522009	11	35286001	35287801
Slit3	MGI:1315202	11	34934726	35522009	11	35444001	35446001
Odz2	MGI:1345184	11	35820158	37049466	11	36265601	36267401
Gm12128	MGI:3651507	11	37472491	37486668	11	37486601	37488401
Sgcd	MGI:1346525	11	46709755	47802471	11	47748401	47751001
Olfr56	MGI:1333785	11	48864235	48948889	11	48886601	48888001
Olfr1388	MGI:3031222	11	49257355	49258290	11	49258001	49260001
Cdkl3	MGI:2388268	11	51817723	51903286	11	51867801	51869401
Acsl6	MGI:894291	11	54117300	54178258	11	54138401	54140401
Gria1	MGI:95808	11	56824889	57143746	11	56921401	56922801
Olfr311	MGI:3030145	11	58654618	58655544	11	58653601	58656001
Wnt9a	MGI:2446084	11	59120430	59147054	11	59133601	59135601
Pemt	MGI:104535	11	59784116	59859991	11	59797201	59799401
Slc5a10	MGI:1926089	11	61486283	61534328	11	61498401	61499801
Fam83g	MGI:1916890	11	61497593	61523453	11	61498401	61499801
Ulk2	MGI:1352758	11	61589151	61668575	11	61581201	61589401
Ncor1	MGI:1349717	11	62129928	62272043	11	62184801	62187401
Zfp286	MGI:2384758	11	62566879	62602964	11	62581401	62584401
Rap1gap2	MGI:3028623	11	74196858	74403688	11	74180601	74198201
Sgsm2	MGI:2144695	11	74662763	74710562	11	74697401	74700201
Sgsm2	MGI:2144695	11	74662763	74710562	11	74704001	74705601
Myo1d	MGI:107728	11	80295628	80593527	11	80580001	80581601
Car10	MGI:1919855	11	92959342	93463059	11	93364801	93366601
Zfp652	MGI:2442221	11	95573987	95696429	11	95640801	95645801
Plcd3	MGI:107451	11	102931618	102962972	11	102949001	102951401
Ccdc57	MGI:1918526	11	120687843	120794186	11	120774001	120775801
Foxk2	MGI:1916087	11	121121304	121171210	11	121135601	121137801
Foxk2	MGI:1916087	11	121121304	121171210	11	121171201	121178801
Wdr45l	MGI:1914090	11	121188538	121215759	11	121203001	121204601
Tbcd	MGI:1919686	11	121313263	121478478	11	121331001	121334001
Tbcd	MGI:1919686	11	121313263	121478478	11	121442601	121444401
Hpcal1	MGI:1855689	12	17697620	17798732	12	17754201	17756801
Gm10480	MGI:3642435	12	18223364	18224634	12	18206801	18262401
Gm9590	MGI:3779999	12	18394561	18413667	12	18351401	18444801
5730507C01Rik	MGI:1917882	12	18521544	18540997	12	18479001	18580801
Gm3944	MGI:3782118	12	18859727	18876660	12	18863601	18868001
Gm3944	MGI:3782118	12	18859727	18876660	12	18870401	18872601
Gm9292	MGI:3647448	12	22811251	22888999	12	22830201	22831801
Sntg2	MGI:1919541	12	30859347	31058240	12	31004401	31006001
Cog5	MGI:2145130	12	32339734	32622495	12	32356201	32358801
Gm4511	MGI:3782696	12	33281577	33285361	12	33280201	33282201
Cdhr3	MGI:1916014	12	33718661	33777740	12	33729201	33731001
Bzw2	MGI:1914162	12	36818849	36883368	12	36828001	36830001
Prkd1	MGI:99879	12	51442708	51750085	12	51685201	51689201
Slc25a21	MGI:2445059	12	57813621	58298459	12	57852801	57854201
Ttc6	MGI:2684915	12	58797921	58838785	12	58825001	58827201
Ttc6	MGI:2684915	12	58797921	58838785	12	58831001	58834001
Lrfn5	MGI:2144814	12	62624137	62958915	12	62686001	62688401
Lrfn5	MGI:2144814	12	62624137	62958915	12	62877001	62878801
Mdga2	MGI:2444706	12	67572169	68322190	12	67732601	67734401
Mdga2	MGI:2444706	12	67572169	68322190	12	68052001	68053601
Prkch	MGI:97600	12	74685784	74879172	12	74740201	74743601
Rhoj	MGI:1931551	12	76409309	76502443	12	76480001	76482001
Rad51l1	MGI:1099436	12	80398338	80609643	12	80505001	80506801
Dcaf5	MGI:2444785	12	81437669	81537526	12	81532401	81534401
Nrxn3	MGI:1096389	12	90191843	91571500	12	90308001	90310001
Nrxn3	MGI:1096389	12	90191843	91571500	12	90492001	90493601
Nrxn3	MGI:1096389	12	90191843	91571500	12	90959401	90961001
Nrxn3	MGI:1096389	12	90191843	91571500	12	91152801	91154601
Nrxn3	MGI:1096389	12	90191843	91571500	12	91243801	91245601
Tshr	MGI:98849	12	92639491	92778318	12	92679401	92684201
Gtf2a1	MGI:1933277	12	92797155	92828927	12	92800001	92801801
Kcnk10	MGI:1919508	12	99672204	99816150	12	99697401	99699801
Ttc8	MGI:1923510	12	100158784	100221448	12	100167601	100169401
Catsperb	MGI:2443988	12	102642892	102864160	12	102851001	102853001
Lgmn	MGI:1330838	12	103632294	103678023	12	103649801	103651601
4831426I19Rik	MGI:2442408	12	106168159	106248019	12	106180001	106183201
Evl	MGI:1194884	12	109792930	109926723	12	109815601	109817601
Akt1	MGI:87986	12	113892032	113913095	12	113903401	113907601
Gm16948	MGI:4439872	12	114849395	114849828	12	114834201	114853801
Gm16592	MGI:4439516	12	114940335	114940789	12	114920601	114940601
Gm16698	MGI:4439622	12	115134619	115135157	12	115124401	115135001
Gm16996	MGI:4439920	12	115170170	115170588	12	115169401	115194601
Gm16612	MGI:4439536	12	115186493	115186943	12	115169401	115194601
Gm16683	MGI:4439607	12	115232680	115233109	12	115228801	115237201
Gm16999	MGI:4439923	12	115272016	115272487	12	115256801	115297601
Gm16697	MGI:4439621	12	115821780	115822213	12	115807001	115826401
Gm16900	MGI:4439824	12	116597351	116597783	12	116595801	116602001
Gm16746	MGI:4439670	12	117100078	117100511	12	117072601	117112801
Gm16812	MGI:4439736	12	117106984	117107413	12	117072601	117112801
Vipr2	MGI:107166	12	117316264	117383841	12	117329601	117332201
Wdr60	MGI:2445085	12	117445523	117501498	12	117486201	117491201
Ptprn2	MGI:107418	12	117724306	118515266	12	117784601	117786801
Ptprn2	MGI:107418	12	117724306	118515266	12	117795001	117796801
Ptprn2	MGI:107418	12	117724306	118515266	12	117801001	117803201
Ptprn2	MGI:107418	12	117724306	118515266	12	117836201	117838801
Ptprn2	MGI:107418	12	117724306	118515266	12	117861601	117866201
Ptprn2	MGI:107418	12	117724306	118515266	12	117878201	117880601
Ptprn2	MGI:107418	12	117724306	118515266	12	117922601	117924601
Ptprn2	MGI:107418	12	117724306	118515266	12	118091001	118093201
Ptprn2	MGI:107418	12	117724306	118515266	12	118331601	118334001
Dnahc11	MGI:1100864	12	119116456	119437516	12	119122801	119124601
Abcb5	MGI:1924956	12	120102826	120204894	12	120188401	120192001
Gm6768	MGI:3648259	12	120499402	120502745	12	120498801	120504201
Adarb2	MGI:2151118	13	8202112	8767993	13	8374201	8376001
Adarb2	MGI:2151118	13	8202112	8767993	13	8390201	8392601
Adarb2	MGI:2151118	13	8202112	8767993	13	8413601	8416201
Adarb2	MGI:2151118	13	8202112	8767993	13	8452801	8454601
Gm8372	MGI:3644813	13	8452489	8454561	13	8452801	8454601
Adarb2	MGI:2151118	13	8202112	8767993	13	8560201	8563001
Adarb2	MGI:2151118	13	8202112	8767993	13	8632801	8637001
Adarb2	MGI:2151118	13	8202112	8767993	13	8639201	8641601
Adarb2	MGI:2151118	13	8202112	8767993	13	8653201	8660401
Larp4b	MGI:106330	13	9093151	9172332	13	9166601	9168801
Dip2c	MGI:1920179	13	9276228	9668171	13	9345201	9350801
Chrm3	MGI:88398	13	9875859	10360049	13	9918001	9920801
Chrm3	MGI:88398	13	9875859	10360049	13	10201201	10203401
Chrm3	MGI:88398	13	9875859	10360049	13	10228001	10231801
Lyst	MGI:107448	13	13682676	13869707	13	13809601	13812401
Hecw1	MGI:2444115	13	14318705	14615495	13	14457001	14458601
Gli3	MGI:95729	13	15555068	15821859	13	15780801	15783401
5033411D12Rik	MGI:1923221	13	16949689	17786566	13	16963601	16965601
5033411D12Rik	MGI:1923221	13	16949689	17786566	13	16979401	16981601
5033411D12Rik	MGI:1923221	13	16949689	17786566	13	16982801	16986601
5033411D12Rik	MGI:1923221	13	16949689	17786566	13	17197601	17200401
5033411D12Rik	MGI:1923221	13	16949689	17786566	13	17419601	17421401
5033411D12Rik	MGI:1923221	13	16949689	17786566	13	17671201	17673001
5033411D12Rik	MGI:1923221	13	16949689	17786566	13	17705201	17707601
5033411D12Rik	MGI:1923221	13	16949689	17786566	13	17710601	17712801
5033411D12Rik	MGI:1923221	13	16949689	17786566	13	17730601	17733001
Cdk13	MGI:1916812	13	17807568	17896836	13	17878601	17880401
Rala	MGI:1927243	13	17972409	18036073	13	18027401	18030801
Vmn1r188	MGI:2182259	13	22179747	22180673	13	22177001	22183601
2610307P16Rik	MGI:1919768	13	28551903	28977489	13	28586801	28591601
F13a1	MGI:1921395	13	36959056	37141073	13	37130201	37133001
Sykb	MGI:99515	13	52678542	52744161	13	52688401	52690801
Smad5	MGI:1328787	13	56804371	56843738	13	56813601	56815201
Smad5	MGI:1328787	13	56804371	56843738	13	56820401	56822201
Spock1	MGI:105371	13	57527455	58009636	13	57545801	57548801
Spock1	MGI:105371	13	57527455	58009636	13	57758601	57760601
Spock1	MGI:105371	13	57527455	58009636	13	57855201	57857201
Ntrk2	MGI:97384	13	58907957	59231337	13	59226001	59227601
Cast	MGI:1098236	13	74831734	74945369	13	74926201	74929001
Rhobtb3	MGI:1920546	13	76006985	76081373	13	76064401	76072001
Spata9	MGI:1922821	13	76105187	76136416	13	76122001	76124001
Mctp1	MGI:1926021	13	76521983	77171071	13	77131601	77135001
Mef2c	MGI:99458	13	83643194	83802927	13	83718201	83720401
Gm4076	MGI:3782251	13	85266604	85294721	13	85271801	85276601
Gm4076	MGI:3782251	13	85266604	85294721	13	85282401	85286401
Rasa1	MGI:97860	13	85354385	85428634	13	85393001	85395001
Edil3	MGI:1329025	13	88961077	89462828	13	89132001	89136801
Gm4117	MGI:3782293	13	89879065	90026771	13	89973601	89977001
Xrcc4	MGI:1333799	13	89913632	90229213	13	89973601	89977001
Gm4117	MGI:3782293	13	89879065	90026771	13	89987401	89989401
Xrcc4	MGI:1333799	13	89913632	90229213	13	89987401	89989401
Gm4117	MGI:3782293	13	89879065	90026771	13	90000801	90002201
Xrcc4	MGI:1333799	13	89913632	90229213	13	90000801	90002201
Atg10	MGI:1914045	13	91074954	91363592	13	91081401	91083401
Atg10	MGI:1914045	13	91074954	91363592	13	91091001	91092601
Ssbp2	MGI:1914220	13	91599888	91843034	13	91645401	91647201
Ssbp2	MGI:1914220	13	91599888	91843034	13	91754401	91756601
Serinc5	MGI:2444223	13	93381093	93481902	13	93392601	93394401
Iqgap2	MGI:2449975	13	96397132	96661877	13	96647201	96648801
Sv2c	MGI:1922459	13	96729398	96902532	13	96846601	96852801
Naip1	MGI:1298223	13	101177749	101216466	13	101175001	101188401
Gm9858	MGI:3809036	13	101185515	101185930	13	101175001	101188401
Naip1	MGI:1298223	13	101177749	101216466	13	101188601	101191801
Mast4	MGI:1918885	13	103524891	104124541	13	104020201	104025401
Erbb2ip	MGI:1890169	13	104608867	104710594	13	104690201	104691801
Gm2590	MGI:3780758	13	104688065	104691410	13	104690201	104691801
Zswim6	MGI:1914513	13	108514697	108680342	13	108648401	108650201
Depdc1b	MGI:2145425	13	109106531	109179751	13	109179001	109185801
Pde4d	MGI:99555	13	109240142	110743669	13	109246401	109250001
Pde4d	MGI:99555	13	109240142	110743669	13	110192801	110195001
Pde4d	MGI:99555	13	109240142	110743669	13	110268601	110271001
Pde4d	MGI:99555	13	109240142	110743669	13	110465201	110467001
Pde4d	MGI:99555	13	109240142	110743669	13	110640201	110642201
Pxk	MGI:1289230	14	8930757	8997624	14	8986001	8987801
4930452B06Rik	MGI:1926154	14	9263706	9498754	14	9368801	9370601
4930452B06Rik	MGI:1926154	14	9263706	9498754	14	9457001	9458601
Fhit	MGI:1277947	14	10382606	11994549	14	10560601	10563401
Fhit	MGI:1277947	14	10382606	11994549	14	10566401	10568801
Fhit	MGI:1277947	14	10382606	11994549	14	10598201	10600401
Fhit	MGI:1277947	14	10382606	11994549	14	10692001	10693401
Fhit	MGI:1277947	14	10382606	11994549	14	11010401	11013601
Fhit	MGI:1277947	14	10382606	11994549	14	11016001	11019001
Fhit	MGI:1277947	14	10382606	11994549	14	11328201	11330801
Fhit	MGI:1277947	14	10382606	11994549	14	11608801	11610201
Fhit	MGI:1277947	14	10382606	11994549	14	11617601	11619201
Fhit	MGI:1277947	14	10382606	11994549	14	11708601	11710801
Fhit	MGI:1277947	14	10382606	11994549	14	11976401	11978001
Ptprg	MGI:97814	14	12386046	13074555	14	12504201	12506401
Gm5087	MGI:3643653	14	13989902	14117152	14	14090801	14093001
Synpr	MGI:1919253	14	14117294	14447973	14	14131401	14133801
Synpr	MGI:1919253	14	14117294	14447973	14	14210201	14212201
Synpr	MGI:1919253	14	14117294	14447973	14	14268401	14269801
Synpr	MGI:1919253	14	14117294	14447973	14	14339201	14340601
Gm281	MGI:2685127	14	14647463	14746992	14	14710401	14712001
Atxn7	MGI:2179277	14	14845005	14936574	14	14874401	14876401
Nek10	MGI:2685128	14	15653279	15839445	14	15707201	15709201
Rarb	MGI:97857	14	17263353	17407724	14	17372401	17374601
Thrb	MGI:98743	14	18493474	18870600	14	18613401	18616001
Thrb	MGI:98743	14	18493474	18870600	14	18741001	18743601
Thrb	MGI:98743	14	18493474	18870600	14	18754001	18757801
Thrb	MGI:98743	14	18493474	18870600	14	18767601	18770401
Thrb	MGI:98743	14	18493474	18870600	14	18826001	18832401
Ube2e1	MGI:107411	14	19115236	19164373	14	19141201	19143801
Ube2e2	MGI:2384997	14	19406091	19726781	14	19491001	19492801
Ube2e2	MGI:2384997	14	19406091	19726781	14	19529601	19531801
Ube2e2	MGI:2384997	14	19406091	19726781	14	19541001	19543401
Ube2e2	MGI:2384997	14	19406091	19726781	14	19600401	19602001
Ube2e2	MGI:2384997	14	19406091	19726781	14	19697601	19699601
Myst4	MGI:1858746	14	22319076	22491354	14	22413001	22417201
1700112E06Rik	MGI:1923883	14	22838934	23875307	14	22846801	22848201
1700112E06Rik	MGI:1923883	14	22838934	23875307	14	23180601	23182001
Erc2	MGI:1098749	14	28435628	29291723	14	28806201	28807601
Erc2	MGI:1098749	14	28435628	29291723	14	29238601	29241001
Cacna2d3	MGI:1338890	14	29718133	30535050	14	30068001	30070001
Cacna2d3	MGI:1338890	14	29718133	30535050	14	30441201	30443001
Sfmbt1	MGI:1859609	14	31528035	31635899	14	31548801	31550601
Sfmbt1	MGI:1859609	14	31528035	31635899	14	31595201	31597201
Phf11	MGI:1918441	14	59895750	59916359	14	59893601	59899401
Phf11	MGI:1918441	14	59895750	59916359	14	59899601	59907201
Phf11	MGI:1918441	14	59895750	59916359	14	59908401	59919401
Gm4902	MGI:3645789	14	59939808	59960188	14	59937801	59951601
Gm4902	MGI:3645789	14	59939808	59960188	14	59952401	59968801
D14Ertd668e	MGI:1277133	14	59966244	59984307	14	59952401	59968801
D14Ertd668e	MGI:1277133	14	59966244	59984307	14	59970201	59973001
Mipep	MGI:1917728	14	61403425	61522447	14	61438601	61440601
Mipep	MGI:1917728	14	61403425	61522447	14	61444201	61446201
Mipep	MGI:1917728	14	61403425	61522447	14	61493801	61495601
Kpna3	MGI:1100863	14	61984023	62058711	14	62029201	62031401
Defb47	MGI:3644478	14	63616939	63619903	14	63619001	63622001
Mtmr9	MGI:2442842	14	64142447	64162790	14	64160601	64162801
Slc39a14	MGI:2384851	14	70703276	70751232	14	70697601	70703401
Xpo7	MGI:1929705	14	71054053	71166435	14	71127401	71129401
Fndc3a	MGI:1196463	14	72937753	73109810	14	72991401	72993401
2900040C04Rik	MGI:1920143	14	76651264	76652137	14	76649801	76652201
Dgkh	MGI:2444188	14	78969416	79124896	14	79047201	79048801
1300010F03Rik	MGI:1919008	14	79248991	79602117	14	79255201	79257801
1300010F03Rik	MGI:1919008	14	79248991	79602117	14	79286801	79288601
Pcdh9	MGI:1306801	14	93414731	94287951	14	93690001	93691801
Pcdh9	MGI:1306801	14	93414731	94287951	14	93761801	93764201
Pcdh9	MGI:1306801	14	93414731	94287951	14	94178401	94183201
Pcdh9	MGI:1306801	14	93414731	94287951	14	94256601	94258601
Gm4385	MGI:3782570	14	94500141	94665105	14	94618201	94620201
6720463M24Rik	MGI:1924994	14	99445596	99473326	14	99460801	99465401
Pibf1	MGI:1261910	14	99498652	99653712	14	99521801	99525001
Scel	MGI:1891228	14	103912558	104012563	14	103947801	103950801
Scel	MGI:1891228	14	103912558	104012563	14	103980401	103982201
Gm4671	MGI:3782852	14	114819594	114823420	14	114818801	114824601
Gpc5	MGI:1194894	14	115491848	116923659	14	115515001	115517801
Gpc5	MGI:1194894	14	115491848	116923659	14	115571601	115573201
Gpc5	MGI:1194894	14	115491848	116923659	14	116561201	116563601
Gpc6	MGI:1346322	14	117324519	118378751	14	117607601	117609401
Gpc6	MGI:1346322	14	117324519	118378751	14	117691601	117693601
Gpc6	MGI:1346322	14	117324519	118378751	14	117751001	117753801
Ghr	MGI:95708	15	3267760	3533492	15	3511801	3515601
Wdr70	MGI:1921020	15	7823055	8049209	15	7949201	7951001
Nipbl	MGI:1913976	15	8241225	8394463	15	8301001	8307801
Ugt3a1	MGI:2146055	15	9209584	9244787	15	9228001	9232401
Ugt3a1	MGI:2146055	15	9209584	9244787	15	9233401	9236001
Ugt3a1	MGI:2146055	15	9209584	9244787	15	9237201	9242601
Gm2556	MGI:3780724	15	14728978	14978385	15	14805201	14807401
Cdh10	MGI:107436	15	18750084	18943989	15	18911401	18913401
Gm6267	MGI:3779581	15	19440077	19648475	15	19448401	19450801
Gm6267	MGI:3779581	15	19440077	19648475	15	19455601	19461801
Gm6267	MGI:3779581	15	19440077	19648475	15	19480401	19484801
Gm6267	MGI:3779581	15	19440077	19648475	15	19605201	19607401
Gm6267	MGI:3779581	15	19440077	19648475	15	19621601	19624801
Cdh12	MGI:109503	15	21041207	21519288	15	21156401	21159801
Cdh12	MGI:109503	15	21041207	21519288	15	21264201	21266001
Cdh12	MGI:109503	15	21041207	21519288	15	21308801	21312001
Cdh12	MGI:109503	15	21041207	21519288	15	21371201	21374001
Cdh12	MGI:109503	15	21041207	21519288	15	21398201	21402201
Cdh12	MGI:109503	15	21041207	21519288	15	21454401	21457001
40603	MGI:3608327	15	26238803	26339331	15	26258601	26260401
Fbxl7	MGI:3052506	15	26470214	26825319	15	26545401	26547801
Fbxl7	MGI:3052506	15	26470214	26825319	15	26590401	26594801
Fbxl7	MGI:3052506	15	26470214	26825319	15	26731801	26733801
Ctnnd2	MGI:1195966	15	30102348	30959066	15	30171601	30177001
Dap	MGI:1918190	15	31154180	31204090	15	31158601	31161601
Laptm4b	MGI:1890494	15	34167919	34214050	15	34187801	34190401
Matn2	MGI:109613	15	34236436	34365997	15	34248201	34250801
Stk3	MGI:1928487	15	34805251	35085561	15	34873001	34875201
Stk3	MGI:1928487	15	34805251	35085561	15	34922601	34924201
Stk3	MGI:1928487	15	34805251	35085561	15	34932001	34933601
Stk3	MGI:1928487	15	34805251	35085561	15	35046001	35048401
Stk3	MGI:1928487	15	34805251	35085561	15	35053201	35055201
Vps13b	MGI:1916380	15	35301304	35859849	15	35310401	35313401
Vps13b	MGI:1916380	15	35301304	35859849	15	35315801	35319401
Vps13b	MGI:1916380	15	35301304	35859849	15	35319601	35322801
Vps13b	MGI:1916380	15	35301304	35859849	15	35327601	35329401
Vps13b	MGI:1916380	15	35301304	35859849	15	35492801	35498601
Vps13b	MGI:1916380	15	35301304	35859849	15	35519401	35521001
Gm7968	MGI:3644983	15	35519069	35521393	15	35519401	35521001
Vps13b	MGI:1916380	15	35301304	35859849	15	35557201	35559601
Vps13b	MGI:1916380	15	35301304	35859849	15	35621801	35623601
Vps13b	MGI:1916380	15	35301304	35859849	15	35712601	35717201
Vps13b	MGI:1916380	15	35301304	35859849	15	35781401	35784201
Vps13b	MGI:1916380	15	35301304	35859849	15	35838201	35839601
Spag1	MGI:1349387	15	36109123	36165365	15	36108601	36110601
Spag1	MGI:1349387	15	36109123	36165365	15	36122601	36125201
Spag1	MGI:1349387	15	36109123	36165365	15	36131801	36134201
Trps1	MGI:1927616	15	50491988	50721587	15	50626201	50628601
Colec10	MGI:3606482	15	54242329	54297913	15	54282001	54283401
Gm9920	MGI:3642228	15	54931472	54945232	15	54933801	54935401
Sntb1	MGI:101781	15	55470398	55738504	15	55707801	55709401
BC026439	MGI:2446114	15	57075322	57309180	15	57139401	57149001
BC026439	MGI:2446114	15	57075322	57309180	15	57242401	57244601
Fer1l6	MGI:3645398	15	58341603	58496647	15	58345001	58347201
Fer1l6	MGI:3645398	15	58341603	58496647	15	58371601	58374201
Pvt1	MGI:97824	15	61869602	62081079	15	62071801	62073601
Eppk1	MGI:2386306	15	75932792	75950625	15	75933001	75936001
Apol7b	MGI:3583950	15	77252640	77277922	15	77260601	77262401
Apol7b	MGI:3583950	15	77252640	77277922	15	77264601	77269601
Apol7e	MGI:3704456	15	77529319	77549718	15	77532401	77535401
Apol7e	MGI:3704456	15	77529319	77549718	15	77538601	77540201
Apol7e	MGI:3704456	15	77529319	77549718	15	77541601	77544401
Apol8	MGI:2444921	15	77578229	77585678	15	77578201	77581201
Myh9	MGI:107717	15	77591017	77672605	15	77636001	77638401
Slc25a17	MGI:1342248	15	81149351	81191195	15	81148401	81150601
Efcab6	MGI:1924877	15	83697142	83895809	15	83868801	83871201
Ppp6r2	MGI:1918724	15	89041990	89116692	15	89081801	89083601
Slc2a13	MGI:2146030	15	91098127	91403692	15	91306401	91309801
Cntn1	MGI:105980	15	91881596	92172384	15	91897001	91899201
Cntn1	MGI:105980	15	91881596	92172384	15	91915001	91916401
Cntn1	MGI:105980	15	91881596	92172384	15	91931001	91933201
Cntn1	MGI:105980	15	91881596	92172384	15	91938401	91940201
Pdzrn4	MGI:3056996	15	92427557	92601321	15	92443801	92449601
Tmem117	MGI:2444580	15	94459616	94926528	15	94515001	94517401
Tmem117	MGI:2444580	15	94459616	94926528	15	94551601	94555801
Tmem117	MGI:2444580	15	94459616	94926528	15	94567001	94569601
Tmem117	MGI:2444580	15	94459616	94926528	15	94665001	94667401
Tmem117	MGI:2444580	15	94459616	94926528	15	94707401	94708801
Gm6961	MGI:3644546	15	95577674	95603734	15	95581001	95583401
Ano6	MGI:2145890	15	95621274	95805180	15	95699401	95702001
Ano6	MGI:2145890	15	95621274	95805180	15	95702601	95705001
Olfr288	MGI:3030122	15	98016446	98025973	15	98019201	98021801
Olfr288	MGI:3030122	15	98016446	98025973	15	98023001	98026601
Gm4563	MGI:3782747	15	103437732	103440060	15	103436401	103438401
Gm3707	MGI:3781883	16	3098752	3108551	16	3103001	3105601
1600021P15Rik	MGI:1917028	16	28826262	28929784	16	28866601	28869001
Pdia5	MGI:1919849	16	35397399	35490959	16	35475401	35481001
Pdia5	MGI:1919849	16	35397399	35490959	16	35482601	35486401
Sema5b	MGI:107555	16	35541231	35664818	16	35544401	35548801
Sema5b	MGI:107555	16	35541231	35664818	16	35550201	35556001
Gm10809	MGI:3642225	16	42725815	42875875	16	42798401	42800401
Drd3	MGI:94925	16	43762355	43822952	16	43793601	43795601
Gm5486	MGI:3647871	16	49923415	49955152	16	49955001	49957801
Bbx	MGI:1917758	16	50191957	50432503	16	50288601	50293001
Bbx	MGI:1917758	16	50191957	50432503	16	50322601	50324801
Bbx	MGI:1917758	16	50191957	50432503	16	50333801	50337801
Gm4439	MGI:3782622	16	54204783	54212403	16	54209801	54212201
Gm6958	MGI:3779643	16	55961428	55965167	16	55956601	55962001
Abi3bp	MGI:2444583	16	56478013	56689430	16	56497201	56500601
Abi3bp	MGI:2444583	16	56478013	56689430	16	56611801	56613601
Htr1f	MGI:99842	16	64924555	65105680	16	64966801	64969001
Cadm2	MGI:2442722	16	66655666	67621153	16	66754401	66756401
Cadm2	MGI:2442722	16	66655666	67621153	16	66941401	66943201
Cadm2	MGI:2442722	16	66655666	67621153	16	67307001	67310201
Cadm2	MGI:2442722	16	66655666	67621153	16	67334001	67335601
Cadm2	MGI:2442722	16	66655666	67621153	16	67390201	67392601
4930578N18Rik	MGI:1925465	16	76122858	76156331	16	76134601	76137801
4930578N18Rik	MGI:1925465	16	76122858	76156331	16	76140601	76145001
Usp25	MGI:1353655	16	77014314	77117024	16	77026601	77029201
Cxadr	MGI:1201679	16	78301741	78360030	16	78357001	78358401
Gm16509	MGI:3641946	16	80947590	80950214	16	80945401	80973801
4932438H23Rik	MGI:1921637	16	91054180	91095367	16	91065401	91067801
Gm10326	MGI:3714485	17	7528995	7550323	17	7547001	7550201
Gm9992	MGI:3712668	17	7568047	7583639	17	7570201	7576601
Gm9992	MGI:3712668	17	7568047	7583639	17	7577801	7586401
5830477G23Rik	MGI:1923366	17	7603874	7610959	17	7606001	7614201
Gpr31c	MGI:1354371	17	13244187	13245146	17	13231601	13263401
Tcp10b	MGI:98542	17	13253977	13275092	17	13231601	13263401
Tcp10b	MGI:98542	17	13253977	13275092	17	13267401	13277401
Gm11166	MGI:3810119	17	13289545	13291338	17	13282401	13294401
Unc93a	MGI:1933250	17	13301483	13324657	17	13304201	13321001
Unc93a	MGI:1933250	17	13301483	13324657	17	13324401	13327801
Gm10512	MGI:3642173	17	13397908	13399077	17	13360001	13436001
Smok2a	MGI:1351487	17	13414054	13420524	17	13360001	13436001
Smok2b	MGI:3037705	17	13421718	13430055	17	13360001	13436001
Gm9880	MGI:3711246	17	13547438	13569717	17	13498801	13603201
2700054A10Rik	MGI:1919828	17	13675419	13898832	17	13672801	13678601
Tcte2	MGI:98641	17	13675419	13898832	17	13672801	13678601
2700054A10Rik	MGI:1919828	17	13675419	13898832	17	13686401	13689201
Tcte2	MGI:98641	17	13675419	13898832	17	13686401	13689201
2700054A10Rik	MGI:1919828	17	13675419	13898832	17	13690001	13697001
Tcte2	MGI:98641	17	13675419	13898832	17	13690001	13697001
2700054A10Rik	MGI:1919828	17	13675419	13898832	17	13699601	13703801
Tcte2	MGI:98641	17	13675419	13898832	17	13699601	13703801
Gm16051	MGI:3801836	17	13702893	13704059	17	13699601	13703801
2700054A10Rik	MGI:1919828	17	13675419	13898832	17	13723201	13725601
Tcte2	MGI:98641	17	13675419	13898832	17	13723201	13725601
2700054A10Rik	MGI:1919828	17	13675419	13898832	17	13727401	13733801
Tcte2	MGI:98641	17	13675419	13898832	17	13727401	13733801
2700054A10Rik	MGI:1919828	17	13675419	13898832	17	13734001	13748401
Tcte2	MGI:98641	17	13675419	13898832	17	13734001	13748401
Smoc2	MGI:1929881	17	14416542	14541771	17	14477001	14479401
BC018101	MGI:3052731	17	17201077	17226592	17	17195201	17251201
Zfp97	MGI:105921	17	17258379	17283795	17	17256601	17309201
Gm5165	MGI:3646034	17	17330403	17343357	17	17340001	17344401
Lnpep	MGI:2387123	17	17664687	17761453	17	17697001	17698801
Vmn2r96	MGI:3644514	17	18701778	18753278	17	18716401	18723801
Vmn2r98	MGI:3647977	17	19096215	19218275	17	19130401	19133201
Vmn2r98	MGI:3647977	17	19096215	19218275	17	19133401	19135801
Vmn2r98	MGI:3647977	17	19096215	19218275	17	19158201	19160401
Vmn2r101	MGI:3648468	17	19716572	19749281	17	19726801	19730201
Vmn2r101	MGI:3648468	17	19716572	19749281	17	19731001	19740001
Vmn2r102	MGI:3647786	17	19766304	19831712	17	19826601	19828601
Vmn2r105	MGI:3646973	17	20344768	20393288	17	20385801	20388401
Vmn2r105	MGI:3646973	17	20344768	20393288	17	20391601	20393801
Vmn1r235	MGI:2159636	17	21397391	21399827	17	21396601	21419801
Zfp52	MGI:99199	17	21672503	21699565	17	21679801	21681601
Gm4944	MGI:3643318	17	22335459	22362581	17	22351601	22359401
Vmn2r111	MGI:3647034	17	22696025	22708020	17	22695801	22700801
Gm3950	MGI:3782124	17	22715867	22722316	17	22710001	22723001
Vmn2r112	MGI:3644292	17	22740280	22751958	17	22737401	22749001
Vmn2r112	MGI:3644292	17	22740280	22751958	17	22751201	22755001
Vmn2r113	MGI:3648972	17	23080151	23095781	17	23079601	23082801
Vmn2r114	MGI:3648252	17	23427901	23449280	17	23441201	23442601
Abca17	MGI:3625331	17	24401204	24487974	17	24473201	24475001
Nudt3	MGI:1928484	17	27716327	27760410	17	27717001	27719801
Nudt3	MGI:1928484	17	27716327	27760410	17	27725801	27729401
Zfand3	MGI:1096572	17	30142032	30346964	17	30181601	30183201
Zfand3	MGI:1096572	17	30142032	30346964	17	30343601	30345201
Btbd9	MGI:1916625	17	30357046	30667310	17	30585001	30638801
Gm9874	MGI:3642006	17	30622456	30622908	17	30585001	30638801
Btbd9	MGI:1916625	17	30357046	30667310	17	30639401	31060801
Glo1	MGI:95742	17	30729806	30749539	17	30639401	31060801
1700097N02Rik	MGI:1914772	17	30759394	30762030	17	30639401	31060801
Dnahc8	MGI:107714	17	30763936	31012209	17	30639401	31060801
Gm9937	MGI:3642051	17	31011751	31012146	17	30639401	31060801
Glp1r	MGI:99571	17	31038812	31073455	17	30639401	31060801
Gm10503	MGI:3642784	17	31060691	31100165	17	30639401	31060801
Cbs	MGI:88285	17	31749568	31774144	17	31765001	31766801
H2-T22	MGI:95956	17	36175352	36179692	17	36171801	36180201
H2-T9	MGI:95965	17	36175352	36179692	17	36171801	36180201
Gm6034	MGI:3646212	17	36179906	36195590	17	36171801	36180201
Gm6034	MGI:3646212	17	36179906	36195590	17	36180401	36186201
Gm6034	MGI:3646212	17	36179906	36195590	17	36193001	36195401
Gm11127	MGI:3779381	17	36193272	36193385	17	36193001	36195401
C920025E04Rik	MGI:2442805	17	36246172	36248792	17	36243201	36251401
H2-T10	MGI:95942	17	36254035	36258389	17	36257001	36261201
Gm10500	MGI:3641966	17	36258775	36265692	17	36257001	36261201
Gm10499	MGI:3702919	17	36278703	36282868	17	36275801	36287001
Gm8909	MGI:3704134	17	36301918	36305467	17	36295801	36318801
Gm318	MGI:2685164	17	36533966	36535604	17	36533401	36535201
Gm6780	MGI:3779630	17	39981811	39983280	17	39980801	39984801
Opn5	MGI:2662912	17	42693732	42748262	17	42696201	42697601
Opn5	MGI:2662912	17	42693732	42748262	17	42727801	42729401
Opn5	MGI:2662912	17	42693732	42748262	17	42736001	42740401
Gpr115	MGI:1925499	17	42793840	42829233	17	42816601	42820601
Gm4368	MGI:3782553	17	43671865	43680564	17	43670201	43672601
Cyp39a1	MGI:1927096	17	43804474	43887794	17	43836801	43838601
Cyp39a1	MGI:1927096	17	43804474	43887794	17	43859801	43861401
Clic5	MGI:1917912	17	44325521	44417117	17	44385201	44387401
Polh	MGI:1891457	17	46308942	46339574	17	46313801	46316401
Taf8	MGI:1926879	17	47624999	47639236	17	47628401	47630401
Bysl	MGI:1858419	17	47738186	47748167	17	47738801	47741401
Med20	MGI:1929648	17	47748531	47820810	17	47762201	47764801
Tcfeb	MGI:103270	17	47873979	47929368	17	47887601	47889801
Lrfn2	MGI:1917780	17	49071704	49236913	17	49210801	49212601
Daam2	MGI:1923691	17	49595347	49703662	17	49671001	49674201
Plcl2	MGI:1352756	17	50648742	50827795	17	50743201	50745401
Gm4445	MGI:3782629	17	51334012	51618410	17	51367601	51370401
Gm4445	MGI:3782629	17	51334012	51618410	17	51578001	51580601
Gm4445	MGI:3782629	17	51334012	51618410	17	51588801	51593601
Gm4445	MGI:3782629	17	51334012	51618410	17	51612601	51615001
Kat2b	MGI:1343094	17	53706640	53812045	17	53726001	53727401
Pot1b	MGI:1920086	17	55791323	55839517	17	55829201	55830801
Cntnap5c	MGI:3646013	17	57908993	58549765	17	58449001	58450801
2610034M16Rik	MGI:1916489	17	59018231	59130798	17	59016201	59019001
Dlgap1	MGI:1346065	17	70318413	71170753	17	70707001	70708801
Dlgap1	MGI:1346065	17	70318413	71170753	17	70764401	70767001
Fam179a	MGI:2443498	17	72022601	72079009	17	72056001	72059601
Alk	MGI:103305	17	72218328	72953049	17	72923801	72926001
Alk	MGI:103305	17	72218328	72953049	17	72926201	72929401
Xdh	MGI:98973	17	74233248	74299522	17	74273401	74275601
Yipf4	MGI:1915114	17	74888856	74899313	17	74898801	74905201
Birc6	MGI:1276108	17	74927635	75102403	17	75100001	75102401
Ttc27	MGI:1921446	17	75117090	75262909	17	75123201	75128001
Ttc27	MGI:1921446	17	75117090	75262909	17	75188201	75191001
Ltbp1	MGI:109151	17	75404908	75791852	17	75425001	75429401
Ltbp1	MGI:109151	17	75404908	75791852	17	75487001	75488801
Ltbp1	MGI:109151	17	75404908	75791852	17	75530001	75535401
Ltbp1	MGI:109151	17	75404908	75791852	17	75547601	75549801
Ltbp1	MGI:109151	17	75404908	75791852	17	75571601	75573401
Dhx57	MGI:2147067	17	80637652	80689816	17	80661401	80663601
Arhgef33	MGI:2685787	17	80746880	80769745	17	80756401	80758201
Sos1	MGI:98354	17	80793092	80879793	17	80861001	80862601
Map4k3	MGI:2154405	17	80979852	81127433	17	81093601	81096001
Ston1	MGI:1924307	17	88997024	89061926	17	89010801	89016401
Fshr	MGI:95583	17	89384292	89600015	17	89393401	89395401
Fshr	MGI:95583	17	89384292	89600015	17	89398201	89400401
Fshr	MGI:95583	17	89384292	89600015	17	89421601	89424401
Fshr	MGI:95583	17	89384292	89600015	17	89467801	89472001
Nrxn1	MGI:1096391	17	90435914	91492337	17	91076401	91079001
Nrxn1	MGI:1096391	17	90435914	91492337	17	91107401	91109801
Nrxn1	MGI:1096391	17	90435914	91492337	17	91310601	91312001
Nrxn1	MGI:1096391	17	90435914	91492337	17	91413001	91415001
Gm4618	MGI:3782800	17	91947285	91948241	17	91946401	91948401
Gm4623	MGI:3782805	17	93373516	93376142	17	93364401	93378001
6030446N20Rik	MGI:2442435	18	12139812	12279989	18	12210401	12214201
6030446N20Rik	MGI:2442435	18	12139812	12279989	18	12246601	12252801
6030446N20Rik	MGI:2442435	18	12139812	12279989	18	12254601	12258601
Lama3	MGI:99909	18	12570050	12741172	18	12633401	12636401
Fhod3	MGI:1925847	18	24867946	25292001	18	24979801	24981601
Fhod3	MGI:1925847	18	24867946	25292001	18	25000801	25003001
Rit2	MGI:108054	18	31133143	31476944	18	31274601	31276601
Rit2	MGI:108054	18	31133143	31476944	18	31298201	31303801
Rit2	MGI:108054	18	31133143	31476944	18	31341001	31343601
Camk4	MGI:88258	18	33099010	33346580	18	33203201	33205001
Camk4	MGI:88258	18	33099010	33346580	18	33327201	33329001
Pcdha1	MGI:2150982	18	37089939	37347311	18	37143801	37146601
Pcdha2	MGI:2681880	18	37098972	37347311	18	37143801	37146601
Pcdha3	MGI:2447313	18	37105861	37347311	18	37143801	37146601
Pcdha4	MGI:1298406	18	37112343	37347311	18	37143801	37146601
Pcdha5	MGI:1298371	18	37120094	37347311	18	37143801	37146601
Pcdha6	MGI:1298367	18	37127285	37347311	18	37143801	37146601
Pcdha7	MGI:1298369	18	37133578	37347311	18	37143801	37146601
Prdm6	MGI:2684938	18	53624705	53735561	18	53662601	53665401
Gramd3	MGI:1914815	18	56591786	56663446	18	56661001	56662601
Fbn2	MGI:95490	18	58168277	58369580	18	58279401	58280801
Fam38b	MGI:1918781	18	63169867	63201376	18	63173001	63174601
Ccbe1	MGI:2445053	18	66204956	66462393	18	66305401	66310201
Rab27b	MGI:1931295	18	70138785	70301259	18	70301001	70304001
Dcc	MGI:94869	18	71418392	72510723	18	71432801	71434401
Dcc	MGI:94869	18	71418392	72510723	18	71551601	71553201
Dcc	MGI:94869	18	71418392	72510723	18	72091201	72092801
Dcc	MGI:94869	18	71418392	72510723	18	72097001	72099801
Dcc	MGI:94869	18	71418392	72510723	18	72226801	72230601
Dcc	MGI:94869	18	71418392	72510723	18	72370801	72373001
Dcc	MGI:94869	18	71418392	72510723	18	72437401	72439001
Smad4	MGI:894293	18	73798663	73863434	18	73849001	73853401
Gm672	MGI:2685518	18	75590878	75857208	18	75733001	75735801
Gm672	MGI:2685518	18	75590878	75857208	18	75760001	75763401
Gm672	MGI:2685518	18	75590878	75857208	18	75789201	75790801
Gm672	MGI:2685518	18	75590878	75857208	18	75804601	75809001
Gm672	MGI:2685518	18	75590878	75857208	18	75831801	75833801
Zbtb7c	MGI:2443302	18	75979832	76308215	18	76042201	76044601
Zbtb7c	MGI:2443302	18	75979832	76308215	18	76049201	76051001
Zbtb7c	MGI:2443302	18	75979832	76308215	18	76077601	76080001
Zbtb7c	MGI:2443302	18	75979832	76308215	18	76249001	76251201
Slc14a1	MGI:1351654	18	78296830	78338858	18	78323801	78325801
Slc14a1	MGI:1351654	18	78296830	78338858	18	78331801	78333601
Pqlc1	MGI:1914193	18	80450031	80489464	18	80489201	80491001
Ctdp1	MGI:1926953	18	80604698	80666434	18	80603401	80605801
Gm2167	MGI:3780337	18	80692556	80727131	18	80693201	80695401
Gm2167	MGI:3780337	18	80692556	80727131	18	80701401	80704001
Gm2167	MGI:3780337	18	80692556	80727131	18	80709401	80711601
Nfatc1	MGI:102469	18	80802944	80909797	18	80858401	80860801
Atp9b	MGI:1354757	18	80931816	81130797	18	80975601	80977201
Atp9b	MGI:1354757	18	80931816	81130797	18	81111201	81114401
Atp9b	MGI:1354757	18	80931816	81130797	18	81121401	81123601
Socs6	MGI:1924885	18	88834616	89096873	18	88907801	88909801
Socs6	MGI:1924885	18	88834616	89096873	18	88955201	88957401
Dok6	MGI:3639495	18	89470474	89938920	18	89484401	89486001
Dok6	MGI:3639495	18	89470474	89938920	18	89568401	89570401
Dok6	MGI:3639495	18	89470474	89938920	18	89589001	89590601
Dok6	MGI:3639495	18	89470474	89938920	18	89699001	89701001
Dok6	MGI:3639495	18	89470474	89938920	18	89713601	89715801
Dok6	MGI:3639495	18	89470474	89938920	18	89845801	89847201
Ms4a4d	MGI:1913857	19	11611291	11632957	19	11626001	11628801
Ms4a6d	MGI:1916024	19	11661094	11679339	19	11665601	11668001
Stx3	MGI:103077	19	11849609	11893893	19	11853601	11855401
Gnaq	MGI:95776	19	16207321	16461943	19	16423601	16425401
Gna14	MGI:95769	19	16510252	16685310	19	16678401	16682001
Vps13a	MGI:2444304	19	16691164	16855417	19	16744801	16748801
BC016495	MGI:2147434	19	18706440	18726684	19	18711401	18714401
Trpm6	MGI:2675603	19	18824473	18967000	19	18839201	18841001
Trpm6	MGI:2675603	19	18824473	18967000	19	18881601	18884601
Trpm3	MGI:2443101	19	22213609	23064374	19	22398401	22404601
Trpm3	MGI:2443101	19	22213609	23064374	19	22724601	22726801
Trpm3	MGI:2443101	19	22213609	23064374	19	22796001	22798201
Trpm3	MGI:2443101	19	22213609	23064374	19	22801201	22803401
Dock8	MGI:1921396	19	25074019	25276922	19	25161401	25164201
1700048O14Rik	MGI:1920683	19	26112942	26546927	19	26466401	26472001
Prkg1	MGI:108174	19	30642041	31839312	19	31531401	31533201
Prkg1	MGI:108174	19	30642041	31839312	19	31615801	31618401
Gm3773	MGI:3781947	19	35470644	35674415	19	35476401	35479601
Gm3773	MGI:3781947	19	35470644	35674415	19	35534401	35536401
Gm3773	MGI:3781947	19	35470644	35674415	19	35658801	35661001
Gm3773	MGI:3781947	19	35470644	35674415	19	35663601	35666801
Gm3773	MGI:3781947	19	35470644	35674415	19	35668601	35677401
A830019P07Rik	MGI:3028035	19	35910851	35999067	19	35978001	35980001
Htr7	MGI:99841	19	36033224	36131850	19	36066801	36069001
Abcc2	MGI:1352447	19	43856682	43912441	19	43879801	43881401
Ccdc147	MGI:2685815	19	48012202	48109868	19	48062201	48063601
Mxi1	MGI:97245	19	53384996	53450300	19	53409801	53412001
Smndc1	MGI:1923729	19	53453704	53465063	19	53452001	53454201
Rbm20	MGI:1920963	19	53751796	53941570	19	53766201	53772401
Gm2015	MGI:3780184	X	26202257	26212991	X	26200201	26203001
Gm2015	MGI:3780184	X	26202257	26212991	X	26209401	26215801
Dmrtc1c1	MGI:1918333	X	99998302	100005281	X	99997401	100000801
Gm15155	MGI:3642241	X	152059284	152780430	X	152428401	152430201
Gm3322	MGI:3781500	X	156719017	156721200	X	156717601	156721401
Gm2948	MGI:3781126	X	162243110	162253436	X	162247201	162249001
Mid1	MGI:1100537	X	166123131	166428730	X	166407601	166427401
G530011O06Rik	MGI:3603513	X	166412975	166416849	X	166407601	166427401

## Sheet: d)
Gene symbol	MGI.ID	Chr	Gene start	Gene end
Hmcn1	MGI:2685047	1	152409654	152840565
Npl	MGI:1921341	1	155350146	155396844
Sirpb1a	MGI:2444824	3	15371819	15426504
Sirpb1b	MGI:3779828	3	15495754	15575065
Sirpb1c	MGI:3807521	3	15695145	15748528
Skint4	MGI:2444425	4	111744621	111840681
Skint3	MGI:3045331	4	111904850	111973073
Skint9	MGI:3045341	4	112058574	112106590
Skint6	MGI:3649262	4	112908844	112959568
Skint5	MGI:3650151	4	113613249	113672102
Skint11	MGI:2685415	4	113835989	113917633
Gm3259	MGI:3781437	5	95734834	95772936
Gm7963	MGI:3643214	5	95854546	95857656
D5Ertd577e	MGI:1261918	5	95885825	95914583
C230055K05Rik	MGI:2441896	5	105242188	105288830
Vmn1r72	MGI:2182256	7	12254948	12255868
Gm6605	MGI:3644762	7	39231315	39237190
Gm5591	MGI:3648692	7	39303158	39313212
Gm4454	MGI:3782638	7	39351859	39356187
Gm1988	MGI:3780157	7	46425170	46435208
Gm6124	MGI:3779556	7	46474468	46480344
Gm16387	MGI:3646111	7	46511994	46519904
Gm6833	MGI:3645553	7	46562898	46572951
Dub2a	MGI:3051372	7	110398251	110401019
Olfr597	MGI:3030431	7	110468915	110469874
Olfr635	MGI:3030469	7	111127690	111128655
Trim34-1	MGI:2137359	7	111392973	111489207
Trim5	MGI:3646853	7	111411900	111436608
Gm15134	MGI:3805550	7	111448744	111485423
Trim12-2	MGI:4821183	7	111487268	111501876
Olfr486	MGI:3030320	7	115315312	115316256
Olfr487	MGI:3030321	7	115355097	115356041
Tex24	MGI:1921539	8	28454866	28459659
E030030I06Rik	MGI:2442914	10	21833938	21868629
Raet1c	MGI:109431	10	21878375	22093945
H60b	MGI:3649078	10	21993152	22008655
Raet1d	MGI:1861032	10	22082077	22093945
Iltifb	MGI:2151139	10	117726685	117732094
Gm10480	MGI:3642435	12	18223364	18224634
Gm9590	MGI:3779999	12	18394561	18413667
5730507C01Rik	MGI:1917882	12	18521544	18540997
Gm16948	MGI:4439872	12	114849395	114849828
Gm16999	MGI:4439923	12	115272016	115272487
Gm16697	MGI:4439621	12	115821780	115822213
Gm16746	MGI:4439670	12	117100078	117100511
Gm16812	MGI:4439736	12	117106984	117107413
Pde4d	MGI:99555	13	109240142	110743669
Cdh12	MGI:109503	15	21041207	21519288
Tcp10b	MGI:98542	17	13253977	13275092
Gm10512	MGI:3642173	17	13397908	13399077
Smok2a	MGI:1351487	17	13414054	13420524
Smok2b	MGI:3037705	17	13421718	13430055
Gm9880	MGI:3711246	17	13547438	13569717
Btbd9	MGI:1916625	17	30357046	30667310
Gm9874	MGI:3642006	17	30622456	30622908
Glo1	MGI:95742	17	30729806	30749539
1700097N02Rik	MGI:1914772	17	30759394	30762030
Dnahc8	MGI:107714	17	30763936	31012209
Gm9937	MGI:3642051	17	31011751	31012146
Glp1r	MGI:99571	17	31038812	31073455
H2-T22	MGI:95956	17	36175352	36179692
H2-T9	MGI:95965	17	36175352	36179692
Gm6034	MGI:3646212	17	36179906	36195590
H2-T10	MGI:95942	17	36254035	36258389
Gm10500	MGI:3641966	17	36258775	36265692
Gm10499	MGI:3702919	17	36278703	36282868
Mid1	MGI:1100537	X	166123131	166428730
G530011O06Rik	MGI:3603513	X	166412975	166416849

## Sheet: e) 
Gene					CNV (in CD-1 mice)
Symbol	MGI ID	Chr	Start	End	Chr	Start	End
Pkhd1	2155808	1	20047860	20608145	1	20549514	20552454
Ogfrl1	1917405	1	23373263	23390014	1	23385680	23385855
Zap70	99613	1	36818706	36839661	1	36837694	36838290
Cdk15	3583944	1	59313750	59409837	1	59336832	59337495
Mreg	2151839	1	72206020	72258881	1	72198891	72210724
D2hgdh	2138209	1	95721817	95748925	1	95748149	95795140
Gal3st2	2685834	1	95757921	95773071	1	95748149	95795140
Dpp10	2442409	1	125228719	125942136	1	125564862	125583245
Zp3r	104965	1	132473290	132526198	1	132430355	132474622
Ren1	97898	1	135247087	135256902	1	135250842	135255585
Gm4788	3646434	1	141594672	141677745	1	141633508	141686866
Uchl5	1914848	1	145624465	145653945	1	145624593	145649348
Ptgs2	97798	1	151947254	151955140	1	151948823	151949622
Hmcn1	2685047	1	152409654	152840565	1	152551280	152551619
Npl	1921341	1	155350146	155396844	1	155362668	155395168
Fam5b	2443333	1	160175397	160286393	1	159719419	160644184
Astn1	1098567	1	160292487	160621917	1	159719419	160644184
Pappa2	3051647	1	160641862	160887870	1	159719419	160644184
Pappa2	3051647	1	160641862	160887870	1	160802986	161749651
1600012P17Rik	1919275	1	160888258	160910621	1	160802986	161749651
4930562F17Rik	1922506	1	161065528	161096518	1	160802986	161749651
Rfwd2	1347046	1	161162457	161277711	1	160802986	161749651
Gm10530	3641765	1	161544880	161615006	1	160802986	161749651
Tnr	99516	1	161667641	161854606	1	160802986	161749651
Ndufs2	2385112	1	173164984	173177253	1	173168430	173168911
Ufc1	1913405	1	173218694	173225155	1	173219128	173222721
Gm7897	3648011	1	175754707	175760157	1	175732220	175912848
Mndal	3780953	1	175779241	175810289	1	175732220	175912848
Mnda	3041120	1	175826486	175843053	1	175732220	175912848
Ifi203	96428	1	175850538	175872803	1	175732220	175912848
Ifi202b	1347083	1	175892706	175912872	1	175732220	175912848
Ifi205	101847	1	175942129	175961886	1	175956768	175956788
Wdr64	1923070	1	177628724	177745497	1	177725275	177729816
Pld5	2442056	1	177892437	178205443	1	177998116	178000769
Nvl	1914709	1	183023554	183074288	1	183060113	183072518
Kcnk2	109366	1	191031812	191167711	1	191042126	191079146
Itih2	96619	2	10016220	10053023	2	10026781	10026809
St8sia6	2386797	2	13572647	13715435	2	13664146	13664834
Arl5b	1923119	2	14971022	15004083	2	14998525	15246657
Armc3	1918132	2	19120929	19231868	2	19097545	19120990
Il1f9	2449929	2	24041996	24049088	2	24048126	24054617
Cacna1b	88296	2	24459407	24618672	2	24535423	24654597
Ehmt1	1924933	2	24646289	24775129	2	24535423	24654597
Scai	2443716	2	38921734	39046250	2	38974768	38976716
Mbd5	2138934	2	48805030	49177804	2	49051169	49070497
Gca	1918521	2	62502342	62532166	2	62524035	62524468
Slc38a11	2443383	2	65154487	65202091	2	65188132	65192936
Itga6	96605	2	71583673	71696473	2	71656510	71687549
Zfp385b	2444734	2	77248691	77657696	2	77654621	77675641
Cwc22	2136773	2	77719216	77784432	2	77675871	77873766
Fam171b	2444579	2	83652793	83723643	2	83693539	83697762
Olfr1031	3030865	2	85831976	85832986	2	85832974	85867734
Olfr1032	3030866	2	85847935	85848867	2	85832974	85867734
Gm3651	3781827	2	85859389	85860655	2	85832974	85867734
Olfr1202	3031036	2	88657330	88658259	2	88639234	88671005
Olfr1247	3031081	2	89449313	89454179	2	89450021	89457958
Olfr1248	3031082	2	89457424	89458347	2	89450021	89457958
Olfr1258	3031092	2	89767476	89770903	2	89760829	89783357
Olfr1259	3031093	2	89783341	89784270	2	89760829	89783357
Olfr140	2177523	2	89891571	89903751	2	89902828	89923597
Mtch2	1929260	2	90687312	90706967	2	90687682	90704935
Gm10801	3641656	2	98502394	98504240	2	98502651	98504185
B230118H07Rik	1915420	2	101400938	101489689	2	101400951	101406561
Ccdc73	3606488	2	104707962	104858061	2	104754730	104755713
Gm4300	3782480	2	114630072	114766408	2	114646550	114812772
Oip5	1917895	2	119435248	119444205	2	119435715	119443644
Slc12a1	103150	2	124978241	125055738	2	125053391	125067750
Fbln7	1917620	2	128688717	128722770	2	128720236	128721154
Macrod2	1920149	2	140221045	142218702	2	141299494	141324822
Slc24a3	2137513	2	144993490	145467902	2	145449366	145461121
Gm1330	2686176	2	148816079	148828987	2	148755144	148927143
Gm10750	3641996	2	148841664	148842065	2	148755144	148927143
Ninl	1925427	2	150760255	150865118	2	150863347	151038740
Nanp	1914561	2	150855421	150865134	2	150863347	151038740
Gm14151	3651016	2	150912522	150918086	2	150863347	151038740
Gm14147	3651555	2	150923981	150929554	2	150863347	151038740
Gm14149	3651549	2	151030931	151057350	2	150863347	151038740
Pdrg1	1915809	2	152834626	152841163	2	152838130	152838140
Rpn2	98085	2	157104753	157152055	2	157151875	157154538
Lbp	1098776	2	158132229	158158588	2	158150954	158151984
Dhx35	1918965	2	158620543	158683950	2	158641258	158643203
Ptprt	1321152	2	161347726	162486883	2	161562255	161562577
Gm14393	3649576	2	174887050	174893282	2	174886491	177803022
Gm14399	3650082	2	174954994	174967513	2	174886491	177803022
Gm14443	3652324	2	174991756	175001372	2	174886491	177803022
Gm14391	3709324	2	175016566	175032418	2	174886491	177803022
Gm14440	3702430	2	175100626	175112306	2	174886491	177803022
Gm4631	3782813	2	175147456	175163698	2	174886491	177803022
Gm4723	3782903	2	175197937	175209702	2	174886491	177803022
Gm4724	3782904	2	175247801	175261308	2	174886491	177803022
Gm8923	3779822	2	175295564	175307672	2	174886491	177803022
Gm11009	3779227	2	175375252	175377087	2	174886491	177803022
2210418O10Rik	1924208	2	175454411	175468170	2	174886491	177803022
Gm2004	3780174	2	175544914	175553148	2	174886491	177803022
Gm11008	3779224	2	175594033	175605283	2	174886491	177803022
Gm11007	3779223	2	175643110	175652992	2	174886491	177803022
Gm4245	3782422	2	175692089	175702778	2	174886491	177803022
Gm2007	3780177	2	175740669	175750551	2	174886491	177803022
Gm14288	3706570	2	175788489	175800225	2	174886491	177803022
Gm6710	3779623	2	175868351	175880380	2	174886491	177803022
Gm8898	3709288	2	175918013	175930232	2	174886491	177803022
Gm2026	3780195	2	175964463	175977956	2	174886491	177803022
Gm14432	3702415	2	176083705	176093584	2	174886491	177803022
Gm14436	3702427	2	176131382	176141650	2	174886491	177803022
Gm14430	3702412	2	176181277	176191160	2	174886491	177803022
Gm14431	3709638	2	176221773	176232462	2	174886491	177803022
Gm14434	3702417	2	176266735	176280240	2	174886491	177803022
Gm14435	3702420	2	176317757	176329924	2	174886491	177803022
Gm2049	3780217	2	176386900	176388685	2	174886491	177803022
Gm14308	3782921	2	176398073	176421053	2	174886491	177803022
Gm14306	3805542	2	176455231	176503794	2	174886491	177803022
Gm14305	3709632	2	176493037	176506522	2	174886491	177803022
Gm14295	3709624	2	176583317	176595928	2	174886491	177803022
Gm14408	3651910	2	176615845	176621435	2	174886491	177803022
Gm14419	3702410	2	176785661	176797492	2	174886491	177803022
Gm14401	3650075	2	176859025	176872052	2	174886491	177803022
Gm14410	3709158	2	176968158	176991126	2	174886491	177803022
Gm4418	3782603	2	177036548	177038248	2	174886491	177803022
Gm14409	3649811	2	177049359	177051741	2	174886491	177803022
Gm14412	3652251	2	177099225	177109012	2	174886491	177803022
Gm14418	3702408	2	177171829	177183025	2	174886491	177803022
Gm14420	3652255	2	177249438	177262834	2	174886491	177803022
Gm14403	3649813	2	177282920	177294176	2	174886491	177803022
Gm14406	3649838	2	177353909	177362915	2	174886491	177803022
Gm14322	3652185	2	177493993	177505177	2	174886491	177803022
Gm14325	3702875	2	177566496	177575041	2	174886491	177803022
Gm14327	3652188	2	177631801	177640489	2	174886491	177803022
C330013J21Rik	1925953	2	177638045	177660318	2	174886491	177803022
Gm14326	3709298	2	177670698	177692002	2	174886491	177803022
Etohi1	1261426	2	177757989	177768727	2	174886491	177803022
2810021G02Rik	2441662	2	177802400	177813181	2	174886491	177803022
Gm7645	3646877	2	181022488	181035063	2	181026765	181027369
Pkia	104747	3	7366604	7445366	3	7421882	7421985
Stmn2	98241	3	8509527	8561604	3	8555413	8556638
Chmp4c	1913621	3	10366907	10391005	3	10385565	10390978
Sirpb1a	2444824	3	15371819	15426504	3	15340258	15819607
Sirpb1b	3779828	3	15495754	15575065	3	15340258	15819607
Sirpb1c	3807521	3	15695145	15748528	3	15340258	15819607
Cp	88476	3	19857054	19909145	3	19908299	19908553
Hps3	2153839	3	19895945	19935315	3	19908299	19908553
Naaladl2	2685867	3	23703838	24682465	3	24116353	24157241
Nceh1	2443191	3	27081887	27183530	3	27091227	27091625
4932438A13Rik	2444631	3	36762043	36951955	3	36939970	36945279
Gm6098	3779552	3	74046186	74047168	3	73914056	74346968
Serpini1	1194506	3	75361469	75447417	3	75378209	75414973
Golim4	1920374	3	75680105	75760871	3	75701773	75712088
Fstl5	2442179	3	75878192	76513941	3	75822052	75927523
Rxfp1	2682211	3	79448638	79541716	3	79517672	79541183
Glrb	95751	3	80647521	80717582	3	80664095	80665695
Ctso	2139628	3	81736523	81760647	3	81739495	81746183
Fgg	95526	3	82811818	82818969	3	82811832	82812650
Pglyrp3	2685266	3	91818505	91835504	3	91831940	91835321
Tdpoz4	3027904	3	93600320	93601432	3	93569096	94040272
Tdpoz3	3027903	3	93629942	93631039	3	93569096	94040272
Tdpoz5	3027905	3	93764214	93765236	3	93569096	94040272
Gm9125	3702970	3	93852944	93854041	3	93569096	94040272
Gm10697	3710527	3	93875544	93876566	3	93569096	94040272
Gm10696	3702972	3	93978334	93982115	3	93569096	94040272
Gm5286	3644284	3	94000636	94003724	3	93569096	94040272
Sycp1	105931	3	102622573	102740007	3	102697496	102739985
Syt6	1859544	3	103379154	103449490	3	103421855	103422775
Cdc14a	2442676	3	115975471	116126950	3	116043731	116044155
Arhgap29	2443818	3	121656147	121719595	3	121705472	121715079
Myoz2	1913063	3	122709124	122737908	3	122728997	122729137
Ppa2	1922026	3	132973074	133041199	3	133030667	133030900
Slc39a8	1914797	3	135488243	135551532	3	135520542	135537289
Emcn	1891716	3	137004031	137095149	3	137032543	137036277
H2afz	1888388	3	137527451	137529884	3	137487798	137529819
Unc5c	1095412	3	141128528	141497888	3	141381217	141384341
Bmpr1b	107191	3	141500100	141832389	3	141728366	141728691
Tmem68	1919348	4	3476188	3502000	4	3458919	3479026
Cngb3	1353562	4	19207997	19437770	4	19295055	19299440
Palm2-Akap2	3845895	4	57581051	57909854	4	57769227	57769969
Akap2	1306795	4	57754967	57909854	4	57769227	57769969
Ptprd	97812	4	75587143	77857865	4	77028168	77043306
Ptprd	97812	4	75587143	77857865	4	77228417	77255056
Tm2d1	2137022	4	98022061	98049997	4	98039179	98039527
Pgm2	97565	4	99602019	99659899	4	99656586	99659910
Rab3b	1917158	4	108551668	108615929	4	108610948	108611085
Skint4	2444425	4	111744621	111840681	4	111745396	112286229
Skint3	3045331	4	111904850	111973073	4	111745396	112286229
Skint9	3045341	4	112058574	112106590	4	111745396	112286229
Skint2	3649629	4	112286202	112320445	4	111745396	112286229
Skint10	2685416	4	112383752	112447471	4	112348832	113968233
Skint6	3649262	4	112908844	112959568	4	112348832	113968233
Skint5	3650151	4	113613249	113672102	4	112348832	113968233
Skint11	2685415	4	113835989	113917633	4	112348832	113968233
Gm10573	3649909	4	121654799	121668854	4	121651872	122237050
Gm13083	3650232	4	143204906	143208498	4	143201660	143205948
Gm13109	3649968	4	143538483	143540919	4	143539831	143555553
Gm13101	3650204	4	143554421	143556853	4	143539831	143555553
Gm13235	3649925	4	145458697	145489878	4	145452418	146034593
Gm13248	3713585	4	145539879	145587078	4	145452418	146034593
Gm13247	3700965	4	145658647	145696012	4	145452418	146034593
2610036A22Rik	1917440	4	145729798	145765642	4	145452418	146034593
Gm13251	3700963	4	145729798	145749009	4	145452418	146034593
Rex2	1328322	4	145881260	145889548	4	145452418	146034593
Gm7026	3779649	4	145942681	145954578	4	145452418	146034593
Gm13154	3651986	4	146927386	146959307	4	146941153	147202567
2610305D13Rik	2148252	4	146986046	147016622	4	146941153	147202567
Zfp534	3650650	4	147047611	147076662	4	146941153	147202567
Gm13157	3651978	4	147128308	147149942	4	146941153	147202567
2810408P10Rik	1922865	4	147197095	147222475	4	146941153	147202567
9430015G10Rik	2444364	4	155484091	155501374	4	155497765	155507226
Gm8591	3646803	4	155503367	155512909	4	155497765	155507226
Cdk6	1277162	5	3344312	3522225	5	3499602	3519482
Mterf	1918240	5	3890581	3893933	5	3884799	3922844
Cdk14	894318	5	4803391	5380251	5	4844004	4869796
Cdk14	894318	5	4803391	5380251	5	5129103	5135345
Gtpbp10	2385599	5	5537454	5559538	5	5538674	5547973
A330021E22Rik	2443778	5	5579278	5664239	5	5584666	5584972
Gm4047	3782222	5	11190195	11222015	5	10785521	11246794
Galntl5	1915159	5	24687278	24726115	5	24721251	24722132
Galnt11	2444392	5	24728700	24771736	5	24735376	24752262
Jakmip1	1923321	5	37438671	37539255	5	37404544	37441150
Rbpj	96522	5	53947018	54048684	5	54011829	54052518
Tmem156	2685292	5	65456368	65482794	5	65457666	65458442
Corin	1349451	5	72691265	72895447	5	72864953	72887910
Dcun1d4	2140972	5	73872241	73952033	5	73849774	73880229
Epha5	99654	5	84486816	84846407	5	84551530	84563500
5830473C10Rik	1923342	5	90990244	91008734	5	91008627	91008703
Shroom3	1351655	5	93112461	93394785	5	93157395	93174537
Gm7792	3704104	5	94281097	94284656	5	94161655	96262456
Gm16429	3704105	5	94353803	94358078	5	94161655	96262456
Gm6346	3644199	5	94365781	94368514	5	94161655	96262456
BC061212	2681870	5	94495177	94499571	5	94161655	96262456
Gm6351	3647817	5	94505411	94510023	5	94161655	96262456
Gm3106	3781282	5	94647020	94650562	5	94161655	96262456
Gm16522	4360987	5	94731544	94735821	5	94161655	96262456
Gm6502	3779601	5	94743494	94746227	5	94161655	96262456
AA792892	2140789	5	94810361	94814104	5	94161655	96262456
Gm7682	3779756	5	94874843	94877576	5	94161655	96262456
Gm3139	3781318	5	94955309	94968473	5	94161655	96262456
Gm3147	3781326	5	95041094	95045367	5	94161655	96262456
Gm6509	3779602	5	95053038	95055771	5	94161655	96262456
Gm6523	3779604	5	95206896	95210006	5	94161655	96262456
Gm3183	3781362	5	95294521	95307501	5	94161655	96262456
Gm7942	3646599	5	95537068	95540177	5	94161655	96262456
Gm16513	2141041	5	95611623	95624586	5	94161655	96262456
Gm10424	3704250	5	95697512	95701787	5	94161655	96262456
Gm6468	3646666	5	95709481	95711989	5	94161655	96262456
Gm3259	3781437	5	95734834	95772936	5	94161655	96262456
Gm7963	3643214	5	95854546	95857656	5	94161655	96262456
D5Ertd577e	1261918	5	95885825	95914583	5	94161655	96262456
Gm3286	3781464	5	95947694	95950987	5	94161655	96262456
Gm7971	3779772	5	96019618	96023894	5	94161655	96262456
Gm6348	3643967	5	96031597	96034330	5	94161655	96262456
Gm7978	3704107	5	96160857	96165192	5	94161655	96262456
Gm7982	3648891	5	96171033	96175636	5	94161655	96262456
E330014E10Rik	3615333	5	96204889	96233734	5	94161655	96262456
C230055K05Rik	2441896	5	105242188	105288830	5	105034912	105359320
Gbp9	3605620	5	105508317	105539297	5	105511760	105511768
Pde6b	97525	5	108817410	108861416	5	108854265	108854385
Gm10417	3642677	5	109293852	109297373	5	109297277	109405615
Gm3432	3781610	5	109323598	109390640	5	109297277	109405615
Sez6l	1935121	5	112848180	113006205	5	112964873	112965257
Ccdc60	2141043	5	116574650	116738994	5	116694063	116703656
Nos1	97360	5	118231041	118408849	5	118388158	118390795
1700123K08Rik	1923908	5	139003068	139005922	5	139004112	139005838
Flt1	95558	5	148373180	148537587	5	148493203	148495504
Col28a1	2685312	6	7947808	8142617	6	8041854	8049012
Cadps2	2443963	6	23212773	23789420	6	23304438	23304526
Slc13a1	1859937	6	24038295	24118092	6	24062606	24063639
Cntnap2	1914047	6	45010060	47251368	6	45499299	45520306
Il23r	2181693	6	67372926	67441849	6	67402363	67416752
Gm4966	3646892	6	67892070	67892534	6	67876359	68253141
Gm5571	3647784	6	67999977	68000448	6	67876359	68253141
Gm16797	4439721	6	68071085	68071821	6	67876359	68253141
Gm16939	4439863	6	68206398	68206863	6	67876359	68253141
Gm16637	4439561	6	68581957	68582424	6	68535332	68785029
Gm10879	3642277	6	68718549	68719097	6	68535332	68785029
Gm10880	3779447	6	69134820	69135355	6	69017899	69193441
Gm1499	2686345	6	69176848	69177377	6	69017899	69193441
Gm11143	3809111	6	69548902	69567418	6	69452717	69650773
Gm1524	2686370	6	69557269	69557795	6	69452717	69650773
Gm16852	4439776	6	69631400	69631933	6	69452717	69650773
Gm11142	3779397	6	69643493	69645302	6	69452717	69650773
Pole4	1914229	6	82568986	82655359	6	82601443	82602661
Magi1	1203522	6	93628030	94233316	6	93784886	93785383
Frmd4b	2141794	6	97236861	97567535	6	97429680	97475425
Gm7865	3779768	6	98457720	98647619	6	98496702	98523715
Pdzrn3	1933157	6	101099603	101327891	6	101279285	101286899
Cntn3	99534	6	102113300	102414661	6	102304927	102326421
Chl1	1098266	6	103460870	103683029	6	103383705	103460909
Cntn6	1858223	6	104442784	104813400	6	104527703	104528363
D6Wsu116e	106463	6	116158075	116212683	6	116198049	116199740
Tead4	106907	6	128174306	128250841	6	128202481	128204309
Gm4697	3782877	6	128728503	128730111	6	128729176	128769001
Klrb1c	107538	6	128728507	128738598	6	128729176	128769001
Klrb1b	107539	6	128763724	128776317	6	128729176	128769001
Klra8	102968	6	130065244	130079916	6	130065363	130316515
Gm11082	3779313	6	130090299	130093709	6	130065363	130316515
Klra14	1321089	6	130099124	130110766	6	130065363	130316515
Klra9	1321153	6	130128771	130143130	6	130065363	130316515
Gm11081	3779312	6	130131767	130134749	6	130065363	130316515
Klra7	101901	6	130168623	130183340	6	130065363	130316515
Klra12	1321091	6	130216427	130259519	6	130065363	130316515
Klra10	1321093	6	130219212	130231946	6	130065363	130316515
Klra23	1930932	6	130241179	130258379	6	130065363	130316515
Gm11080	3779311	6	130265549	130265862	6	130065363	130316515
Klra3	101905	6	130273307	130287592	6	130065363	130316515
Klra1	101907	6	130313936	130336892	6	130065363	130316515
Gm6601	3779613	6	130738055	130750786	6	130707413	130787067
Gm7193	3648824	6	130750918	130838803	6	130707413	130787067
Slc15a5	3607714	6	137932107	138021717	6	137984036	137984036
Lmo3	102810	6	138311439	138530489	6	138345026	138345242
Pik3c2g	1203730	6	139664382	139917807	6	139788838	139789925
Pik3c2g	1203730	6	139664382	139917807	6	139864605	139882163
Plcz1	2150308	6	139938197	139989978	6	139939182	139950758
Cmas	1337124	6	142705206	142724234	6	142719701	142721973
Gm7457	3648132	6	142762751	142782014	6	142768112	142806140
St8sia1	106011	6	142770065	142912972	6	142768112	142806140
D6Ertd474e	1196315	6	143194408	143245792	6	143197769	143206183
Lrmp	108424	6	145064173	145123454	6	145108944	145120036
Ifltd1	1921321	6	145313654	145562839	6	145308959	145315910
Vmn1r58	3033473	7	5360494	5364747	7	5363956	5499501
Vmn1r59	3033479	7	5405429	5406361	7	5363956	5499501
Gm7025	3645676	7	5411721	5415102	7	5363956	5499501
Vmn2r28	3645468	7	5432058	5445453	7	5363956	5499501
Vmn1r60	3645244	7	5490908	5498753	7	5363956	5499501
Zfp583	2682297	7	6267262	6282887	7	6274816	6275328
Vmn2r39	3704108	7	9147119	9163358	7	9155987	10622466
Vmn2r40	3757872	7	9246337	9270665	7	9155987	10622466
Gm3644	3781820	7	9327233	9329627	7	9155987	10622466
Gm4033	3782207	7	9422918	9438995	7	9155987	10622466
Vmn2r45	3757883	7	9638195	9656739	7	9155987	10622466
Vmn2r44	3643088	7	9744040	9760130	7	9155987	10622466
Gm7696	3649133	7	9769212	9776255	7	9155987	10622466
Gm10303	3642900	7	9774107	9820158	7	9155987	10622466
Gm3654	3781830	7	9835626	9844689	7	9155987	10622466
Vmn2r43	3037819	7	9866727	9882979	7	9155987	10622466
Vmn2r42	1316666	7	9927007	9944065	7	9155987	10622466
Vmn2r41	3757876	7	9965677	9989982	7	9155987	10622466
Gm4082	3782257	7	10034293	10041283	7	9155987	10622466
Gm3670	3781846	7	10046523	10048914	7	9155987	10622466
Gm3680	3781856	7	10162947	10223709	7	9155987	10622466
Vmn2r46	3757899	7	10333109	10355920	7	9155987	10622466
Vmn2r47	3757929	7	10401183	10426790	7	9155987	10622466
2810047C21Rik1	1919966	7	10455317	10462312	7	9155987	10622466
Vmn2r48	3647749	7	10512973	10538925	7	9155987	10622466
Vmn2r49	3757933	7	10560652	10577604	7	9155987	10622466
Vmn2r50	3643086	7	10622317	10635663	7	9155987	10622466
Nlrp4d	3056574	7	10944250	10974284	7	10962599	10978345
Gm4186	3782362	7	12194634	12199462	7	12198129	12258765
Vmn1r72	2182256	7	12254948	12255868	7	12198129	12258765
Vmn1r78	2159646	7	12737813	12738754	7	12712933	12770476
V1rg10	2159654	7	12761542	12762462	7	12712933	12770476
Crxos1	2451355	7	16467966	16489358	7	16481510	16489413
Nlrp9b	2675377	7	20593372	20658655	7	20658198	24083399
Vmn1r91	3649070	7	20685282	20687430	7	20658198	24083399
Gm16442	3645807	7	20707005	20707928	7	20658198	24083399
Vmn1r93	3033490	7	20723472	20724437	7	20658198	24083399
Vmn1r94	3647287	7	20752809	20754950	7	20658198	24083399
Gm4494	3782679	7	20779059	20779982	7	20658198	24083399
Gm6164	3647652	7	20790033	20792784	7	20658198	24083399
Gm4498	3782683	7	20818257	20820367	7	20658198	24083399
Gm5890	3649012	7	20845734	20848210	7	20658198	24083399
Gm4133	3782309	7	20918491	20920627	7	20658198	24083399
Gm4505	3782690	7	20954049	20955399	7	20658198	24083399
Gm5728	3644398	7	20960112	20960759	7	20658198	24083399
Vmn1r100	3704284	7	21003291	21004214	7	20658198	24083399
Vmn1r101	3782311	7	21027019	21029474	7	20658198	24083399
Gm10670	3642641	7	21059309	21060274	7	20658198	24083399
Vmn1r103	3647681	7	21094966	21095883	7	20658198	24083399
Vmn1r104	3644682	7	21115876	21120109	7	20658198	24083399
Gm5726	3644395	7	21130183	21131106	7	20658198	24083399
Gm4141	3782317	7	21160670	21163486	7	20658198	24083399
Vmn1r107	3780017	7	21253034	21255190	7	20658198	24083399
Gm4144	3782320	7	21287648	21290505	7	20658198	24083399
Gm5156	3648210	7	21309861	21312330	7	20658198	24083399
Vmn1r109	3782702	7	21336572	21358986	7	20658198	24083399
Vmn1r110	3782704	7	21452703	21454859	7	20658198	24083399
Vmn1r111	3645811	7	21487315	21490172	7	20658198	24083399
Gm10668	3642587	7	21509544	21512013	7	20658198	24083399
Vmn1r112	3649076	7	21554842	21557259	7	20658198	24083399
Vmn1r113	3647303	7	21571119	21573227	7	20658198	24083399
Vmn1r114	3642588	7	21596240	21597205	7	20658198	24083399
Vmn1r115	3645605	7	21598432	21630004	7	20658198	24083399
Vmn1r116	3648873	7	21655913	21658361	7	20658198	24083399
Vmn1r118	3645425	7	21696446	21699271	7	20658198	24083399
Vmn1r119	2686293	7	21796551	21798681	7	20658198	24083399
Gm4534	3782718	7	21832092	21833442	7	20658198	24083399
Vmn1r120	3647340	7	21838156	21838803	7	20658198	24083399
Vmn1r121	3648662	7	21882495	21884610	7	20658198	24083399
Vmn1r122	3647341	7	21918230	21920358	7	20658198	24083399
Vmn1r123	2686292	7	21945268	21948127	7	20658198	24083399
Vmn1r124	3779910	7	22044713	22045636	7	20658198	24083399
Vmn1r125	3704112	7	22057198	22058121	7	20658198	24083399
Vmn1r126	3782346	7	22085521	22087648	7	20658198	24083399
Vmn1r127	3779578	7	22103963	22104880	7	20658198	24083399
Vmn1r128	3643535	7	22133033	22135478	7	20658198	24083399
Vmn1r129	3645471	7	22145387	22146310	7	20658198	24083399
Gm6882	3645601	7	22210877	22214131	7	20658198	24083399
Vmn1r130	3782726	7	22295568	22297722	7	20658198	24083399
Gm4172	3782348	7	22330189	22331109	7	20658198	24083399
Vmn1r132	3647009	7	22379150	22400150	7	20658198	24083399
Gm4175	3782351	7	22545550	22546494	7	20658198	24083399
Gm4177	3782353	7	22580830	22581747	7	20658198	24083399
Vmn1r135	3648167	7	22616009	22618456	7	20658198	24083399
Gm5725	3644396	7	22628363	22629286	7	20658198	24083399
Gm5891	3649014	7	22694453	22706310	7	20658198	24083399
Vmn1r137	3782735	7	22779606	22780529	7	20658198	24083399
Gm4179	3782355	7	22812996	22813916	7	20658198	24083399
Gm6176	3644439	7	22835224	22837694	7	20658198	24083399
Vmn1r139	3644494	7	22880539	22882941	7	20658198	24083399
Gm10666	3704285	7	22918795	22919760	7	20658198	24083399
Vmn1r142	3644264	7	22921033	22949054	7	20658198	24083399
Vmn1r143	3644289	7	22973034	22975482	7	20658198	24083399
Gm8653	3647206	7	22985360	22986283	7	20658198	24083399
Gm8453	3644807	7	23013583	23016408	7	20658198	24083399
Gm4557	3782741	7	23041055	23053029	7	20658198	24083399
Gm4187	3782363	7	23113813	23115951	7	20658198	24083399
Gm4562	3782746	7	23149347	23150697	7	20658198	24083399
Gm8660	3645692	7	23155411	23156058	7	20658198	24083399
Vmn1r148	3033483	7	23198602	23199525	7	20658198	24083399
Vmn1r149	3782370	7	23222325	23224770	7	20658198	24083399
Gm10665	3642415	7	23248129	23249094	7	20658198	24083399
Vmn1r151	3644394	7	23283780	23284697	7	20658198	24083399
Vmn1r152	3643438	7	23304677	23308909	7	20658198	24083399
Gm8677	3646576	7	23318983	23319906	7	20658198	24083399
Gm4201	3782378	7	23349442	23352258	7	20658198	24083399
Vmn1r155	3646821	7	23441804	23443960	7	20658198	24083399
Gm8693	3642968	7	23476416	23479273	7	20658198	24083399
Gm4567	3809658	7	23498630	23501099	7	20658198	24083399
Vmn1r157	3646139	7	23545352	23547771	7	20658198	24083399
Gm4569	3782752	7	23558213	23560407	7	20658198	24083399
Vmn1r158	3646143	7	23574878	23577983	7	20658198	24083399
Vmn1r159	3642763	7	23627707	23628624	7	20658198	24083399
Vmn1r160	3779564	7	23654307	23657166	7	20658198	24083399
Gm4214	3782390	7	23768748	23770864	7	20658198	24083399
Gm4216	3782392	7	23804025	23806166	7	20658198	24083399
Vmn1r163	3644349	7	23839198	23841645	7	20658198	24083399
Gm8720	3647550	7	23851552	23852475	7	20658198	24083399
Gm10662	3642760	7	23917642	23929499	7	20658198	24083399
Vmn1r165	3782762	7	24001119	24003274	7	20658198	24083399
Gm4220	3782396	7	24035781	24038453	7	20658198	24083399
Gm6902	3647238	7	24057820	24060289	7	20658198	24083399
Cyp2a5	88597	7	27620358	27628282	7	27627143	27736250
Cyp2a22	3648316	7	27716650	27724405	7	27627143	27736250
Polr2i	1917170	7	31016967	31018409	7	31017542	31018654
Ovol3	2388075	7	31018512	31020744	7	31017542	31018654
Gm6666	3646173	7	32551971	32552438	7	32532002	32694597
Chst8	1916197	7	35459487	35597730	7	35461546	35461901
Pepd	97542	7	35697398	35829729	7	35802070	35807318
1600014C10Rik	1919494	7	38968835	38979989	7	38961668	38997301
Gm6605	3644762	7	39231315	39237190	7	39096069	46665068
Gm5591	3648692	7	39303158	39313212	7	39096069	46665068
Gm4454	3782638	7	39351859	39356187	7	39096069	46665068
Gm1988	3780157	7	46425170	46435208	7	39096069	46665068
Gm6124	3779556	7	46474468	46480344	7	39096069	46665068
Gm16387	3646111	7	46511994	46519904	7	39096069	46665068
Gm6833	3645553	7	46562898	46572951	7	39096069	46665068
Gm9271	3646449	7	46617645	46623502	7	39096069	46665068
Gm5114	3647631	7	46662664	46668530	7	39096069	46665068
Gm2128	3780298	7	48410845	48414225	7	48319662	48548430
Gm6866	3646160	7	48465535	48474629	7	48319662	48548430
Gm5592	3648691	7	48539697	48545553	7	48319662	48548430
Siglece	1932475	7	50906442	50915515	7	50914593	50919381
Gm9717	3780126	7	54810742	54813572	7	54813251	54974058
Mrgpra3	2684085	7	54844320	54856742	7	54813251	54974058
Gm2707	3780876	7	54923462	54924124	7	54813251	54974058
Gm5733	3642992	7	54988369	55007892	7	54976185	55008187
Gm5734	3647104	7	55170688	55173073	7	55052585	55194801
Mrgprb4	3033119	7	55453583	55454548	7	55454535	55702761
Mrgprb13	3033193	7	55566674	55567693	7	55454535	55702761
Mrgprb8	3033134	7	55643953	55644945	7	55454535	55702761
Mrgprb1	3033115	7	55702480	55703532	7	55454535	55702761
Mctp2	2685335	7	79222718	79451481	7	79385029	79385270
5730590G19Rik	1924261	7	86805082	86843020	7	86827857	86840870
Olfr555	3030389	7	109807337	109808284	7	109794774	109817326
Olfr558	3030392	7	109850845	109860568	7	109855744	109858484
Olfr572	3030406	7	110076144	110077100	7	110073824	110096332
Olfr582	3030416	7	110189995	110190954	7	110142788	110201227
Olfr583	3030417	7	110199814	110200773	7	110142788	110201227
Dub2a	3051372	7	110398251	110401019	7	110370159	110491407
Olfr596	3030430	7	110458237	110459175	7	110370159	110491407
Olfr597	3030431	7	110468915	110469874	7	110370159	110491407
Olfr598	3030432	7	110477002	110477961	7	110370159	110491407
Olfr599	3030433	7	110486570	110487517	7	110370159	110491407
Olfr631	3030465	7	111077339	111078298	7	111067015	111077749
Olfr635	3030469	7	111127690	111128655	7	111120174	111154197
Olfr638	3030472	7	111151773	111152738	7	111120174	111154197
Trim34-1	2137359	7	111392973	111489207	7	111428102	111428284
Trim34-1	2137359	7	111392973	111489207	7	111485184	111501846
Trim5	3646853	7	111411900	111436608	7	111428102	111428284
Gm15134	3805550	7	111448744	111485423	7	111485184	111501846
Trim12-2	4821183	7	111487268	111501876	7	111485184	111501846
Trim79	3035181	7	111618528	111656363	7	111647983	111683670
Olfr686	3030520	7	112351902	112352855	7	112352842	112433900
Olfr687	3030521	7	112424010	112424975	7	112352842	112433900
Olfr471	3030305	7	115004566	115005492	7	115004586	115041563
Olfr485	3030319	7	115302432	115303375	7	115300845	115399384
Olfr486	3030320	7	115315312	115316256	7	115300845	115399384
Olfr487	3030321	7	115355097	115356041	7	115300845	115399384
Olfr488	3030322	7	115398706	115399650	7	115300845	115399384
Olfr494	3030328	7	115511006	115511950	7	115511458	115540995
Olfr495	3030329	7	115538636	115539628	7	115511458	115540995
Olfr497	3030331	7	115566087	115567031	7	115566346	115604872
Olfr506	3030340	7	115755823	115756767	7	115735206	115755917
Stk33	2152419	7	116422737	116582595	7	116559867	116581880
Sbf2	1921831	7	117452860	117758436	7	117633683	117650114
Gp2	1914383	7	126586058	126602786	7	126590644	126592641
Gsg1l	2685483	7	133024217	133225925	7	133164530	133182625
Eif4ebp1	103267	8	28370850	28385985	8	28371247	28479196
Tex24	1921539	8	28454866	28459659	8	28371247	28479196
Chrnb3	106212	8	28479183	28510201	8	28371247	28479196
Chrna6	106213	8	28513686	28524356	8	28519836	28531880
Gm1698	2686544	8	28714823	28730924	8	28730777	28743469
4930555F03Rik	1922609	8	50456240	50606449	8	50456466	50456470
Gm9892	3701610	8	53281117	53282553	8	53127775	53284994
Nr3c2	99459	8	79423341	79768911	8	79438032	79453386
Prmt10	2142651	8	80073306	80105237	8	80087901	80089033
Prmt10	2142651	8	80073306	80105237	8	80089624	80092244
Ttc29	1920551	8	80737196	80918225	8	80806213	80834051
1700047G07Rik	1920573	8	99036240	99037504	8	99036252	99037492
Wwox	1931237	8	116963555	117876608	8	117488656	117647628
Galnt2	894694	8	122434741	126869624	8	124603535	124616409
Dpy19l1	1915685	9	24216220	24307584	9	24281885	24282276
Gm9896	3641839	9	35655620	35656126	9	35652844	35929172
Gm3428	3781606	9	35656171	35657517	9	35652844	35929172
9230113P08Rik	1925158	9	35716027	35717300	9	35652844	35929172
Gm5916	3643162	9	35927519	35936364	9	35652844	35929172
Ccdc15	2444488	9	37083420	37155977	9	37086445	37086843
Olfr25	109310	9	38137174	38138115	9	38126083	38141452
Olfr918	3030752	9	38480089	38481066	9	38480102	38488311
Olfr951	3030785	9	39201378	39202322	9	39149141	39234634
Olfr952	3030786	9	39233710	39234654	9	39149141	39234634
Trim43a	3645218	9	88475874	88483657	9	88476937	88499227
Bfsp2	1333828	9	103327250	103382658	9	103355461	103358235
Clasp2	1923749	9	113721704	113828815	9	113721718	113722368
Gpd1l	1289257	9	114808459	114843105	9	114814094	114815852
Golga4	1859646	9	118415436	118491637	9	118476311	118491621
Ppil4	1914668	10	7512689	7542933	10	7534475	7534653
Utrn	104631	10	12101986	12581533	10	12334301	12334411
4930444G20Rik	2149738	10	21786398	21787885	10	21769739	22093887
E030030I06Rik	2442914	10	21833938	21868629	10	21769739	22093887
Raet1c	109431	10	21878375	22093945	10	21769739	22093887
Raet1e	2675273	10	21893327	21903720	10	21769739	22093887
Gm2555	3780723	10	21936313	21938830	10	21769739	22093887
H60b	3649078	10	21993152	22008655	10	21769739	22093887
Raet1d	1861032	10	22082077	22093945	10	21769739	22093887
Enpp1	97370	10	24357720	24431965	10	24369091	24369167
4930431F10Rik	1918888	10	44450575	44458706	10	44430245	44548182
Col13a1	1277201	10	61300984	61441856	10	61300867	61301038
Bicc1	1933388	10	70385580	70622448	10	70494361	70494548
Pcdh15	1891428	10	72562090	74112482	10	73046724	73090099
Dram1	1918962	10	87785549	87841825	10	87785880	87786384
Nav3	2183703	10	109119716	109437275	10	109341525	109363075
Il22	1355307	10	117641998	117647098	10	117614479	117746451
Iltifb	2151139	10	117726685	117732094	10	117614479	117746451
Arhgap9	2143764	10	126760783	126766999	10	126764978	126765568
Vmn2r85	3646965	10	129855317	129866668	10	129849758	129883067
Selm	2149786	11	3414687	3417354	11	3416276	3416511
Ehbp1	2667252	11	21905831	22242295	11	22235060	22253961
Pnpt1	1918951	11	29030744	29061828	11	29035527	29037126
Hba-a2	96016	11	32196489	32197298	11	32188750	32201707
Hbq1	2685722	11	32200069	32200873	11	32188750	32201707
Ranbp17	1929706	11	33111795	33413746	11	33113226	33113486
Ranbp17	1929706	11	33111795	33413746	11	33359372	33375067
D130052B06Rik	2685092	11	33499302	33524013	11	33520397	33534591
Kcnip1	1917607	11	33529339	33893152	11	33520397	33534591
Slit3	1315202	11	34934726	35522009	11	35243687	35260436
Timd2	2159681	11	46483511	46520563	11	46482581	46488864
Sgcd	1346525	11	46709755	47802471	11	47002461	47007067
9930111J21Rik2	3711310	11	48829376	48864744	11	48851297	48886868
Olfr56	1333785	11	48864235	48948889	11	48851297	48886868
Tgtp2	3710083	11	48870696	48877708	11	48851297	48886868
Zfp867	2681848	11	59275298	59285976	11	59279699	59279901
Tom1l2	2443306	11	60040217	60166407	11	60139991	60140876
Ncor1	1349717	11	62129928	62272043	11	62217314	62234630
Nlrp1b	3582959	11	70966604	71044235	11	70974623	71017152
Trpv1	1341787	11	73047794	73074744	11	73070371	73074216
Zfp735	1923640	11	73502280	73527300	11	73503033	73598632
Olfr389	3030223	11	73589889	73594091	11	73503033	73598632
Olfr390	3030224	11	73596468	73601377	11	73503033	73598632
Krt32	1309995	11	99942162	99949540	11	99948025	99948032
Gm11735	3713525	11	116599248	116611242	11	116602360	116630414
BC018473	3039625	11	116613481	116620687	11	116602360	116630414
St6galnac1	1341826	11	116626339	116636821	11	116602360	116630414
Fn3k	1926834	11	121296227	121311805	11	121303097	121310264
Gm10480	3642435	12	18223364	18224634	12	18193095	18552020
Gm9590	3779999	12	18394561	18413667	12	18193095	18552020
5730507C01Rik	1917882	12	18521544	18540997	12	18193095	18552020
Pxdn	1916925	12	30622901	30702523	12	30667058	30671688
Nampt	1929865	12	33505340	33536472	12	33508991	33511756
Tmem195	2442495	12	37968228	38308789	12	38175763	38194460
Rpl17-ps3	3642206	12	68611724	68612318	12	68607278	68622771
Syne2	2449316	12	76919121	77211913	12	77072190	77074593
Mthfd1	1342005	12	77356395	77420789	12	77397670	77403999
Numb	107423	12	85134984	85262884	12	85202936	85230001
Gm2042	3800544	12	89192947	89199118	12	89139185	89415572
Gm2046	3780214	12	89211972	89218668	12	89139185	89415572
Gm2090	3780257	12	89226481	89306748	12	89139185	89415572
Gm6803	3779631	12	89233436	89234457	12	89139185	89415572
Gm2056	3780224	12	89263475	89266819	12	89139185	89415572
Gm5955	3779537	12	89362825	89363845	12	89139185	89415572
Gm10436	3704393	12	89414029	89420263	12	89139185	89415572
Rpl31-ps1	3644997	12	93129336	93129713	12	93121761	93132845
Eml5	2442513	12	100024814	100139694	12	100077912	100080008
Ttc8	1923510	12	100158784	100221448	12	100214407	100217042
Catsperb	2443988	12	102642892	102864160	12	102582454	102828642
Eif5	95309	12	112776381	112782829	12	112776324	112778081
Gm16948	4439872	12	114849395	114849828	12	114835711	114963919
Gm16592	4439516	12	114940335	114940789	12	114835711	114963919
Gm16612	4439536	12	115186493	115186943	12	115186599	115379105
Gm16683	4439607	12	115232680	115233109	12	115186599	115379105
Gm16999	4439923	12	115272016	115272487	12	115186599	115379105
Gm16840	4439764	12	115298056	115298484	12	115186599	115379105
Gm16697	4439621	12	115821780	115822213	12	115795799	115842787
Gm16735	4439659	12	116089401	116089834	12	116056336	116152952
AB069917	3576502	12	116396614	116397046	12	116359895	116583730
Gm9740	3815333	12	116532277	116532573	12	116359895	116583730
Gm16709	4439633	12	116996195	116996627	12	116745882	117040993
Gm16710	4439634	12	117040859	117041291	12	116745882	117040993
Gm16746	4439670	12	117100078	117100511	12	117059447	117200047
Gm16812	4439736	12	117106984	117107413	12	117059447	117200047
Gm16747	4439671	12	117190749	117191042	12	117059447	117200047
Ptprn2	107418	12	117724306	118515266	12	117915807	117945526
Edaradd	1931001	13	12569175	12612715	13	12573915	12574894
Lyst	107448	13	13682676	13869707	13	13804037	13805108
5033411D12Rik	1923221	13	16949689	17786566	13	17090987	17129337
5033411D12Rik	1923221	13	16949689	17786566	13	17220681	17226530
5033411D12Rik	1923221	13	16949689	17786566	13	17390746	17391604
5033411D12Rik	1923221	13	16949689	17786566	13	17574927	17603308
Pou6f2	2443631	13	18216794	18473872	13	18383273	18417107
Vmn1r188	2182259	13	22179747	22180673	13	22180406	22247428
Vmn1r189	2182257	13	22193596	22194534	13	22180406	22247428
Hist1h3e	2448326	13	23653403	23654238	13	23653701	23668319
Hist1h2ae	2448290	13	23662531	23662990	13	23653701	23668319
Hist1h2bg	2448386	13	23663277	23663753	13	23653701	23668319
Hist1h2bf	2448383	13	23665605	23666065	13	23653701	23668319
Hist1h2ad	2448289	13	23666339	23666801	13	23653701	23668319
Hist1h3d	2448322	13	23667632	23668191	13	23653701	23668319
Mrs2	2685748	13	25084352	25112248	13	25099130	25099212
Gm7771	3779762	13	65480484	65516054	13	65478774	66913713
Gm10139	3642815	13	65613614	65613784	13	65478774	66913713
Gm6901	3647487	13	65660102	65660650	13	65478774	66913713
Gm7844	3648609	13	66035525	66051374	13	65478774	66913713
Gm6910	3648043	13	66108677	66112995	13	65478774	66913713
Gm10324	3642406	13	66139239	66141604	13	65478774	66913713
Gm3844	3782016	13	66163389	66163913	13	65478774	66913713
Gm16512	3849447	13	66222141	66222842	13	65478774	66913713
Gm10772	3704404	13	66328421	66440935	13	65478774	66913713
C330022B21Rik	1925949	13	66443221	66450214	13	65478774	66913713
2410141K09Rik	1924053	13	66519050	66534831	13	65478774	66913713
Zfp640	2678025	13	66770877	66774356	13	65478774	66913713
Gm7896	3779770	13	66815592	66903500	13	65478774	66913713
Gm3870	3782043	13	66903632	66925185	13	65478774	66913713
Zfp748	1916455	13	67639590	67654088	13	67635961	67639652
Cast	1098236	13	74831734	74945369	13	74876460	74877016
Pde8b	2443999	13	95794409	96020291	13	95862954	95864309
Naip1	1298223	13	101177749	101216466	13	101131358	101185606
Gm9858	3809036	13	101185515	101185930	13	101131358	101185606
Depdc1b	2145425	13	109106531	109179751	13	109177164	109203852
Pde4d	99555	13	109240142	110743669	13	110143424	110148369
Pde4d	99555	13	109240142	110743669	13	110285017	110360210
Pde4d	99555	13	109240142	110743669	13	110512099	110531531
Map3k1	1346872	13	112536636	112599201	13	112541067	112542692
Arl15	2442308	13	114584767	114947637	13	114694855	114724317
Itga2	96600	13	115626120	115722249	13	115684513	115685411
D830030K20Rik	2443830	14	3224446	3234345	14	3200632	7671143
Gm2938	3781116	14	3262413	3305842	14	3200632	7671143
Gm1973	3780141	14	3500831	3509259	14	3200632	7671143
Gm2971	3781149	14	3555038	3565201	14	3200632	7671143
Gm11109	3779360	14	3609811	3650049	14	3200632	7671143
Gm3012	3781190	14	3740234	3748646	14	3200632	7671143
Gm3043	3781221	14	3794441	3804604	14	3200632	7671143
Gm11108	3779358	14	3857482	3888475	14	3200632	7671143
Gm2916	3781094	14	3987268	4023710	14	3200632	7671143
Gm3029	3781207	14	4034788	4043240	14	3200632	7671143
Gm3099	3781275	14	4101430	4105967	14	3200632	7671143
Gm5796	3779522	14	4126977	4144402	14	3200632	7671143
Gm11107	3779354	14	4152594	4152947	14	3200632	7671143
Gm3115	3781291	14	4187137	4202348	14	3200632	7671143
Gm11106	3779353	14	4227660	4304206	14	3200632	7671143
Gm2969	3781147	14	4252230	4265441	14	3200632	7671143
Gm3127	3781303	14	4268063	4276545	14	3200632	7671143
Gm2974	3781152	14	4285498	4301067	14	3200632	7671143
Gm11105	3779351	14	4322357	4369319	14	3200632	7671143
Gm3149	3781328	14	4420333	4423722	14	3200632	7671143
2610042L04Rik	1914305	14	4450931	4454214	14	3200632	7671143
Gm3159	3781338	14	4500565	4509390	14	3200632	7671143
Gm3164	3781343	14	4518487	4546969	14	3200632	7671143
Gm11104	3779350	14	4523342	4620137	14	3200632	7671143
Gm3182	3781361	14	4584778	4593219	14	3200632	7671143
Gm3047	3781225	14	4658389	4663264	14	3200632	7671143
Gm8160	3779785	14	4696944	4725542	14	3200632	7671143
Gm8159	3647882	14	4735385	4743844	14	3200632	7671143
Gm7876	3779769	14	4812271	4820720	14	3200632	7671143
Gm3084	3781261	14	4854184	4876749	14	3200632	7671143
Gm9602	3780010	14	4879456	4887819	14	3200632	7671143
Gm3269	3781447	14	4941081	4949909	14	3200632	7671143
Gm3278	3781456	14	4995388	5005458	14	3200632	7671143
Gm10410	3704422	14	5033491	5070298	14	3200632	7671143
Gm8297	3643799	14	5086954	5095437	14	3200632	7671143
4930555G01Rik	1922055	14	5153654	5158193	14	3200632	7671143
Gm8279	3779794	14	5234555	5242962	14	3200632	7671143
Gm8271	3648017	14	5289766	5295956	14	3200632	7671143
Gm8265	3779792	14	5380853	5383335	14	3200632	7671143
Gm3170	3781349	14	5440426	5529224	14	3200632	7671143
Gm3187	3781366	14	5627616	5639667	14	3200632	7671143
Gm8246	3644639	14	5642315	5650767	14	3200632	7671143
Gm10411	3809931	14	5746793	6807313	14	3200632	7671143
Gm3208	3781387	14	5801656	5802210	14	3200632	7671143
Gm3215	3781394	14	5884981	5910940	14	3200632	7671143
Gm10021	3704419	14	5939043	5945054	14	3200632	7671143
Gm3424	3781602	14	5953952	5962408	14	3200632	7671143
Gm3229	3781407	14	5965032	5978214	14	3200632	7671143
Gm3453	3781629	14	6102765	6111220	14	3200632	7671143
Gm3253	3781431	14	6113825	6137717	14	3200632	7671143
Gm6337	3646283	14	6181493	6190290	14	3200632	7671143
Gm3476	3781652	14	6254438	6257817	14	3200632	7671143
Gm10412	3704421	14	6419624	6428031	14	3200632	7671143
Gm10341	3704418	14	6436949	6442922	14	3200632	7671143
Gm3532	3781709	14	6473815	6481826	14	3200632	7671143
Gm3339	3781517	14	6566120	6568602	14	3200632	7671143
Gm3341	3781519	14	6606068	6606622	14	3200632	7671143
Gm3348	3781526	14	6625664	6714472	14	3200632	7671143
Gm3518	3781695	14	6757505	6765963	14	3200632	7671143
Gm3366	3781544	14	6768607	6780658	14	3200632	7671143
Gm3537	3781714	14	6826568	6833633	14	3200632	7671143
Gm10413	3704417	14	6956283	6964644	14	3200632	7671143
Gm10409	3710610	14	6973735	6991566	14	3200632	7671143
Gm10408	3704423	14	7012367	7019561	14	3200632	7671143
Gm3411	3781589	14	7108987	7119890	14	3200632	7671143
Gm3597	3781774	14	7128838	7137317	14	3200632	7671143
Gm3618	3781794	14	7147390	7184414	14	3200632	7671143
Gm16440	3647179	14	7213235	7222886	14	3200632	7671143
Gm10407	3779113	14	7241753	7423174	14	3200632	7671143
Gm3594	3781771	14	7268307	7277125	14	3200632	7671143
Gm5957	3779539	14	7353014	7357762	14	3200632	7671143
Gm8356	3779798	14	7361348	7369724	14	3200632	7671143
Gm3460	3781636	14	7451887	7454929	14	3200632	7671143
Gm10251	3704424	14	7470934	7516684	14	3200632	7671143
Gm8050	3779779	14	7544695	7552743	14	3200632	7671143
Gm8362	3648195	14	7598473	7606931	14	3200632	7671143
Gm3475	3781651	14	7656238	7656792	14	3200632	7671143
Gm3642	3781818	14	7664528	7672902	14	3200632	7671143
4930452B06Rik	1926154	14	9263706	9498754	14	9476924	9491919
Fhit	1277947	14	10382606	11994549	14	11851066	11874015
Ngly1	1913276	14	17081809	17144440	14	17144372	17180428
Prkcd	97598	14	31408544	31439396	14	31420361	31420623
Wapal	2675859	14	35487114	35561169	14	35539377	35543834
Ghitm	1913342	14	37935137	37948484	14	37935152	37946976
Sh2d4b	1925182	14	41627078	41706555	14	41640656	41648076
Gm7929	3646066	14	42042756	42078395	14	42076755	42953331
Gm7945	3646596	14	42194917	42199642	14	42076755	42953331
Gm6482	3644578	14	42216174	42221564	14	42076755	42953331
Gm7949	3642973	14	42238091	42242180	14	42076755	42953331
Gm7954	3648778	14	42261033	42266948	14	42076755	42953331
Gm3486	3781663	14	42297518	42302789	14	42076755	42953331
Gm3522	3781699	14	42348742	42364714	14	42076755	42953331
Gm7970	3644387	14	42363409	42368866	14	42076755	42953331
Gm3539	3781716	14	42405411	42481925	14	42076755	42953331
Gm7980	3647449	14	42480620	42486091	14	42076755	42953331
1700049E17Rik1	1920665	14	42503887	42511844	14	42076755	42953331
1700024B05Rik	1922768	14	42522802	42582626	14	42076755	42953331
Gm9890	3642649	14	42525287	42526183	14	42076755	42953331
Gm6401	3645739	14	42541515	42546756	14	42076755	42953331
Gm3543	3781720	14	42556681	42562117	14	42076755	42953331
Gm7995	3779776	14	42660348	42904201	14	42076755	42953331
Gm3578	3781755	14	42670558	42674087	14	42076755	42953331
Gm7951	3648771	14	42690770	42696198	14	42076755	42953331
Gm3573	3781750	14	42764196	42769598	14	42076755	42953331
Gm9611	3780019	14	42870262	42876187	14	42076755	42953331
Gm10380	3642798	14	42872700	43018480	14	42076755	42953331
Gm7999	3643149	14	42935868	42949345	14	42076755	42953331
Gm10379	3642799	14	42948245	43218136	14	42076755	42953331
Ear1	108021	14	44396430	44397304	14	44396801	45349904
Ear10	1890464	14	44500385	44501224	14	44396801	45349904
Gm8113	3648791	14	44503055	44511076	14	44396801	45349904
Ang5	3528599	14	44534734	44540745	14	44396801	45349904
Ang3	1201793	14	44540146	44540583	14	44396801	45349904
Ang6	3528602	14	44579329	44584083	14	44396801	45349904
Gm3299	3781477	14	44612055	44615567	14	44396801	45349904
Ear2	108020	14	44680319	44681199	14	44396801	45349904
Gm3311	3781489	14	44691052	44693307	14	44396801	45349904
Gm3327	3781505	14	44701526	44706280	14	44396801	45349904
4930503E14Rik	1922204	14	44740832	44749036	14	44396801	45349904
Gm8212	3643591	14	44775332	44780798	14	44396801	45349904
Gm8220	3643828	14	44863255	44868733	14	44396801	45349904
Gm8224	3643831	14	44868096	44887627	14	44396801	45349904
Gm8229	3646979	14	44943028	44948506	14	44396801	45349904
Gm3371	3781549	14	44981840	44986482	14	44396801	45349904
Gm8232	3648583	14	45052782	45058224	14	44396801	45349904
Gm9677	3780085	14	45056919	45072083	14	44396801	45349904
BC061237	2682320	14	45119793	45126016	14	44396801	45349904
Gm8247	3644638	14	45202834	45208077	14	44396801	45349904
Gm8256	3779791	14	45233239	45238703	14	44396801	45349904
Gm6541	3647825	14	45306024	45323811	14	44396801	45349904
Gm8267	3648993	14	45325852	45344636	14	44396801	45349904
Wdfy2	2442811	14	63456581	63575291	14	63523410	63543436
Gm9195	3779838	14	72825820	72891655	14	72880516	72895559
Fndc3a	1196463	14	72937753	73109810	14	72957542	72959141
Gm4606	3782789	14	73240448	73263362	14	73243966	73249111
Lcp1	104808	14	75530908	75630649	14	75621182	75623938
Elf1	107180	14	79881001	79982283	14	79921672	79935942
Pibf1	1261910	14	99498652	99653712	14	99527482	99532575
Gpc5	1194894	14	115491848	116923659	14	116640642	116643475
Dock9	106321	14	121941261	122097639	14	122006064	122006350
Cdh10	107436	15	18750084	18943989	15	18713339	18756200
Cdh12	109503	15	21041207	21519288	15	21134231	21172655
Gm2727	3780896	15	21825012	21829418	15	21563129	21834835
Csmd3	2386403	15	47412183	48623609	15	47636509	47639595
Csmd3	2386403	15	47412183	48623609	15	47861366	47886626
Csmd3	2386403	15	47412183	48623609	15	47894162	47942137
Csmd3	2386403	15	47412183	48623609	15	48458300	48477647
Depdc6	2146322	15	54943872	55090826	15	55025921	55026265
BC026439	2446114	15	57075322	57309180	15	57135310	57181123
Atad2	1917722	15	57925602	57966637	15	57941561	57943509
Gm2682	3780851	15	59976589	59995977	15	59995445	60044261
Lrrk2	1913975	15	91503606	91646551	15	91559592	91567072
Nell2	1858510	15	95049881	95359137	15	95128952	95144563
Gm10035	3710670	15	100165360	100170600	15	100148252	100195778
Mettl7a2	3026615	15	100183631	100192250	15	100148252	100195778
Higd1c	2685767	15	100195016	100214386	15	100148252	100195778
2010005H15Rik	1924020	16	36231414	36257530	16	36257364	36334363
Stfa1	106198	16	36277234	36285457	16	36257364	36334363
Gm4758	3648404	16	36308131	36312739	16	36257364	36334363
Gm1975	3780144	16	36321751	36334418	16	36257364	36334363
Naa50	1919367	16	44139943	44163479	16	44159384	44159604
Cd200	1196990	16	45382296	45401508	16	45375511	45390941
Tmem181a	1924356	17	6270475	6305783	17	6255961	6909183
Gm2792	3780960	17	6407216	6410679	17	6255961	6909183
Dynlt1b	98643	17	6429260	6435444	17	6255961	6909183
Gm2802	3780971	17	6491318	6493657	17	6255961	6909183
Gm2808	3780977	17	6506579	6582263	17	6255961	6909183
Dynlt1f	3780996	17	6600835	6609656	17	6255961	6909183
Dynlt1c	3807476	17	6646959	6655064	17	6255961	6909183
Gm2833	3781005	17	6658217	6679001	17	6255961	6909183
Gm2827	3780999	17	6661442	6672834	17	6255961	6909183
Gm2839	3781011	17	6753404	6803325	17	6255961	6909183
Dynlt1d	3781039	17	6797760	6818159	17	6255961	6909183
Dynlt1e	3781053	17	6851795	6860617	17	6255961	6909183
Gm2867	3781044	17	6874264	6878036	17	6255961	6909183
Sytl3	1933367	17	6877808	6942391	17	6255961	6909183
1700122H20Rik	1920867	17	7100289	7106067	17	7098601	7157189
Rsph3b	3630308	17	7108762	7153031	17	7098601	7157189
Tcp10b	98542	17	13253977	13275092	17	13259210	13301725
Gm11166	3810119	17	13289545	13291338	17	13259210	13301725
Unc93a	1933250	17	13301483	13324657	17	13259210	13301725
Gm10512	3642173	17	13397908	13399077	17	13398037	13649185
Smok2a	1351487	17	13414054	13420524	17	13398037	13649185
Smok2b	3037705	17	13421718	13430055	17	13398037	13649185
Gm9880	3711246	17	13547438	13569717	17	13398037	13649185
Vmn1r235	2159636	17	21397391	21399827	17	21378620	21419945
Gm3983	3782156	17	27373557	27473294	17	27427669	27585674
Gm10505	3642687	17	27479405	27481770	17	27427669	27585674
Grm4	1351341	17	27559332	27650286	17	27427669	27585674
Btbd9	1916625	17	30357046	30667310	17	30582926	31058945
Gm9874	3642006	17	30622456	30622908	17	30582926	31058945
Glo1	95742	17	30729806	30749539	17	30582926	31058945
1700097N02Rik	1914772	17	30759394	30762030	17	30582926	31058945
Dnahc8	107714	17	30763936	31012209	17	30582926	31058945
Gm9937	3642051	17	31011751	31012146	17	30582926	31058945
Glp1r	99571	17	31038812	31073455	17	30582926	31058945
Sik1	104754	17	31981193	31992737	17	31987684	31988529
Cyp4f13	2158641	17	33061633	33084347	17	33066096	33073239
Myo1f	107711	17	33692664	33744703	17	33712337	33713456
Btnl3	1932027	17	34514077	34522973	17	34521273	34521839
Btnl6	1932038	17	34644880	34654297	17	34644200	34650995
H2-Q2	95931	17	35479278	35482667	17	35482411	35482653
H2-Q6	95935	17	35561822	35565306	17	35565259	35576419
H2-Q7	95936	17	35576161	35580588	17	35565259	35576419
H2-T24	95958	17	36142640	36157505	17	36151872	36151991
H2-T23	95957	17	36166921	36169646	17	36167127	36248347
H2-T22	95956	17	36175352	36179692	17	36167127	36248347
H2-T9	95965	17	36175352	36179692	17	36167127	36248347
Gm6034	3646212	17	36179906	36195590	17	36167127	36248347
Gm11127	3779381	17	36193272	36193385	17	36167127	36248347
H2-Bl	892004	17	36216993	36221404	17	36167127	36248347
C920025E04Rik	2442805	17	36246172	36248792	17	36167127	36248347
H2-T10	95942	17	36254035	36258389	17	36257749	36302789
Gm10500	3641966	17	36258775	36265692	17	36257749	36302789
Gm10499	3702919	17	36278703	36282868	17	36257749	36302789
2410017I17Rik	1916967	17	36292064	36292354	17	36257749	36302789
Gm8909	3704134	17	36301918	36305467	17	36257749	36302789
Cyp39a1	1927096	17	43804474	43887794	17	43822177	43822413
Tcfeb	103270	17	47873979	47929368	17	47888395	47889838
Kif6	1098238	17	49754461	50049172	17	49818440	49818487
Rftn1	1923688	17	50131582	50329999	17	50132851	50143591
Plcl2	1352756	17	50648742	50827795	17	50703622	50708249
Slc5a7	1927126	17	54412915	54436487	17	54423215	54423500
Dlgap1	1346065	17	70318413	71170753	17	70419780	70420015
Dlgap1	1346065	17	70318413	71170753	17	70731388	70734298
Alk	103305	17	72218328	72953049	17	72689319	72703908
Slc30a6	2386741	17	74794972	74823569	17	74806574	74808253
Hnrpll	1919942	17	80429683	80461608	17	80443846	80449220
Lrpprc	1919666	17	85104587	85190129	17	85125658	85126027
Pigf	99462	17	87396596	87424746	17	87411269	87421277
Klraq1	1921075	17	88929577	88987426	17	88952743	88963711
Npc1	1097712	18	12348202	12394909	18	12384760	12387394
Bin1	108092	18	32536911	32595385	18	32594220	32604842
Dpysl3	1349762	18	43480633	43597940	18	43568830	43609197
Gm3650	3781826	18	43604764	43637164	18	43568830	43609197
1700011I03Rik	1922694	18	57693434	57890719	18	57820265	57902448
Chsy3	1926173	18	59335331	59570100	18	59506767	59507938
Tcf4	98506	18	69503800	69847579	18	69835601	69836287
4930503L19Rik	1922045	18	70612794	70632134	18	70602756	70623157
Dcc	94869	18	71418392	72510723	18	71609676	71611282
Myo5b	106598	18	74600590	74931147	18	74681698	74696062
Myo5b	106598	18	74600590	74931147	18	74750012	74750945
Dym	1918480	18	75178426	75446620	18	75257879	75261870
Rcor2	1859854	19	7341815	7349715	19	7348368	7349675
Gm9750	3642669	19	9209647	9353665	19	9210938	9398238
Gm6252	3644748	19	9290335	9291995	19	9210938	9398238
Gm2601	3780769	19	9326192	9338012	19	9210938	9398238
Ms4a6d	1916024	19	11661094	11679339	19	11666254	11674336
Olfr1431	3031265	19	12284058	12284996	19	12220912	12308914
Olfr1432	3031266	19	12303105	12304034	19	12220912	12308914
Olfr1502	3031336	19	13936285	13937235	19	13926464	13952598
Trpm3	2443101	19	22213609	23064374	19	22260383	22278255
Smarca2	99603	19	26679650	26852811	19	26846010	26846087
Rnls	1915045	19	33212237	33466755	19	33386117	33438568
Gm6857	3779637	19	33572527	33592270	19	33521544	33634022
AI747699	2147592	19	33592230	33664798	19	33521544	33634022
Ifit3	1101055	19	34658021	34663221	19	34662998	34681285
Gm14446	3650685	19	34667381	34673817	19	34662998	34681285
I830134H01Rik	3588250	19	38127342	38127794	19	38127355	38132440
Cep55	1921357	19	38129579	38148911	19	38127355	38132440
Erlin1	2387613	19	44109437	44144015	19	44133553	44133654
Pkd2l1	1352448	19	44222127	44266932	19	44222802	44223055
Pnlip	97722	19	58744855	58756276	19	58755311	58769822
Eif3a	95301	19	60837025	60866546	19	60848615	60849582
Pfkfb1	107816	X	147022772	147078421	X	147048432	147056301
Cnksr2	2661175	X	154259368	154481226	X	154298124	154298522
Mid1	1100537	X	166123131	166428730	X	166341476	166428718
G530011O06Rik	3603513	X	166412975	166416849	X	166341476	166428718

## Sheet: f)
Gene					CNV (in CD-1 mice)			Association CNV with behvior (perc. Time OA of EPM)
Symbol	MGI ID	Chr	Start	End	Chr	Start	End	nominal p-value
Mreg	MGI:2151839	1	72206020	72258881	1	72198891	72210724	0.00542056
Zp3r	MGI:104965	1	132473290	132526198	1	132430355	132474622	0.0930138
Ren1	MGI:97898	1	135247087	135256902	1	135250842	135255585	0.0746349
Nvl	MGI:1914709	1	183023554	183074288	1	183060113	183072518	0.0384841
Gm10801	MGI:3641656	2	98502394	98504240	2	98502651	98504185	0.091292
Pdrg1	MGI:1915809	2	152834626	152841163	2	152838130	152838140	0.0546469
Lbp	MGI:1098776	2	158132229	158158588	2	158150954	158151984	0.0617539
Dhx35	MGI:1918965	2	158620543	158683950	2	158641258	158643203	0.0177804
Sirpb1a	MGI:2444824	3	15371819	15426504	3	15340258	15819607	0.0121259
Sirpb1b	MGI:3779828	3	15495754	15575065	3	15340258	15819607	0.0121259
Sirpb1c	MGI:3807521	3	15695145	15748528	3	15340258	15819607	0.0121259
Serpini1	MGI:1194506	3	75361469	75447417	3	75378209	75414973	0.0611498
Cdc14a	MGI:2442676	3	115975471	116126950	3	116043731	116044155	0.0473359
Skint4	MGI:2444425	4	111744621	111840681	4	111745396	112286229	0.0451375
Skint3	MGI:3045331	4	111904850	111973073	4	111745396	112286229	0.0451375
Skint9	MGI:3045341	4	112058574	112106590	4	111745396	112286229	0.0451375
Skint2	MGI:3649629	4	112286202	112320445	4	111745396	112286229	0.0451375
Skint10	MGI:2685416	4	112383752	112447471	4	112348832	113968233	0.0241214
Skint6	MGI:3649262	4	112908844	112959568	4	112348832	113968233	0.0241214
Skint5	MGI:3650151	4	113613249	113672102	4	112348832	113968233	0.0241214
Skint11	MGI:2685415	4	113835989	113917633	4	112348832	113968233	0.0241214
C230055K05Rik	MGI:2441896	5	105242188	105288830	5	105034912	105359320	0.0359293
Gbp9	MGI:3605620	5	105508317	105539297	5	105511760	105511768	0.0290679
Nos1	MGI:97360	5	118231041	118408849	5	118388158	118390795	0.0865783
Flt1	MGI:95558	5	148373180	148537587	5	148493203	148495504	0.0368095
Col28a1	MGI:2685312	6	7947808	8142617	6	8041854	8049012	0.044231
Cadps2	MGI:2443963	6	23212773	23789420	6	23304438	23304526	0.0496762
Cntn6	MGI:1858223	6	104442784	104813400	6	104527703	104528363	0.0913661
Slc15a5	MGI:3607714	6	137932107	138021717	6	137984036	137984036	0.00220219
Lmo3	MGI:102810	6	138311439	138530489	6	138345026	138345242	0.00471823
Plcz1	MGI:2150308	6	139938197	139989978	6	139939182	139950758	0.0282056
Nr3c2	MGI:99459	8	79423341	79768911	8	79438032	79453386	0.0141112
Ttc29	MGI:1920551	8	80737196	80918225	8	80806213	80834051	0.0543472
4930431F10Rik	MGI:1918888	10	44450575	44458706	10	44430245	44548182	0.0695961
Pcdh15	MGI:1891428	10	72562090	74112482	10	73046724	73090099	0.0394078
Ranbp17	MGI:1929706	11	33111795	33413746	11	33359372	33375067	0.0293195
D130052B06Rik	MGI:2685092	11	33499302	33524013	11	33520397	33534591	0.0731808
Kcnip1	MGI:1917607	11	33529339	33893152	11	33520397	33534591	0.0731808
Gm11735	MGI:3713525	11	116599248	116611242	11	116602360	116630414	0.0105269
BC018473	MGI:3039625	11	116613481	116620687	11	116602360	116630414	0.0105269
St6galnac1	MGI:1341826	11	116626339	116636821	11	116602360	116630414	0.0105269
Mthfd1	MGI:1342005	12	77356395	77420789	12	77397670	77403999	0.0604414
Eml5	MGI:2442513	12	100024814	100139694	12	100077912	100080008	0.00117845
Ttc8	MGI:1923510	12	100158784	100221448	12	100214407	100217042	0.00403753
Catsperb	MGI:2443988	12	102642892	102864160	12	102582454	102828642	0.0760982
Itga2	MGI:96600	13	115626120	115722249	13	115684513	115685411	0.0994685
4930452B06Rik	MGI:1926154	14	9263706	9498754	14	9476924	9491919	0.065303
Elf1	MGI:107180	14	79881001	79982283	14	79921672	79935942	0.0951897
Dock9	MGI:106321	14	121941261	122097639	14	122006064	122006350	0.0353453
Naa50	MGI:1919367	16	44139943	44163479	16	44159384	44159604	0.0815317
Tmem181a	MGI:1924356	17	6270475	6305783	17	6255961	6909183	0.00169821
Gm2792	MGI:3780960	17	6407216	6410679	17	6255961	6909183	0.00169821
Dynlt1b	MGI:98643	17	6429260	6435444	17	6255961	6909183	0.00169821
Gm2802	MGI:3780971	17	6491318	6493657	17	6255961	6909183	0.00169821
Gm2808	MGI:3780977	17	6506579	6582263	17	6255961	6909183	0.00169821
Dynlt1f	MGI:3780996	17	6600835	6609656	17	6255961	6909183	0.00169821
Dynlt1c	MGI:3807476	17	6646959	6655064	17	6255961	6909183	0.00169821
Gm2833	MGI:3781005	17	6658217	6679001	17	6255961	6909183	0.00169821
Gm2827	MGI:3780999	17	6661442	6672834	17	6255961	6909183	0.00169821
Gm2839	MGI:3781011	17	6753404	6803325	17	6255961	6909183	0.00169821
Dynlt1d	MGI:3781039	17	6797760	6818159	17	6255961	6909183	0.00169821
Dynlt1e	MGI:3781053	17	6851795	6860617	17	6255961	6909183	0.00169821
Gm2867	MGI:3781044	17	6874264	6878036	17	6255961	6909183	0.00169821
Sytl3	MGI:1933367	17	6877808	6942391	17	6255961	6909183	0.00169821
Tcp10b	MGI:98542	17	13253977	13275092	17	13259210	13301725	0.0737553
Gm11166	MGI:3810119	17	13289545	13291338	17	13259210	13301725	0.0737553
Unc93a	MGI:1933250	17	13301483	13324657	17	13259210	13301725	0.0737553
Gm10512	MGI:3642173	17	13397908	13399077	17	13398037	13649185	0.0724967
Smok2a	MGI:1351487	17	13414054	13420524	17	13398037	13649185	0.0724967
Smok2b	MGI:3037705	17	13421718	13430055	17	13398037	13649185	0.0724967
Gm9880	MGI:3711246	17	13547438	13569717	17	13398037	13649185	0.0724967
Kif6	MGI:1098238	17	49754461	50049172	17	49818440	49818487	0.086107
1700011I03Rik	MGI:1922694	18	57693434	57890719	18	57820265	57902448	0.0536709
Myo5b	MGI:106598	18	74600590	74931147	18	74681698	74696062	0.00839237
Dym	MGI:1918480	18	75178426	75446620	18	75257879	75261870	0.0355476
Rcor2	MGI:1859854	19	7341815	7349715	19	7348368	7349675	0.0875601
Ifit3	MGI:1101055	19	34658021	34663221	19	34662998	34681285	0.0593679
Gm14446	MGI:3650685	19	34667381	34673817	19	34662998	34681285	0.0593679
